# Supplementary material for: Altered hair root gene expression profiles highlight calcium signaling and lipid metabolism pathways to be associated with curly hair initiation and maintenance in Mangalitza pigs
Source: Front Genet. 2023 Jun 7;14:1184015. doi: 10.3389/fgene.2023.1184015 (PMC10282778; doi:10.3389/fgene.2023.1184015)
Supplement: Supplementary file 1 [file Table2.XLSX]

## Sheet: Sheet1
Table S2 Differentially expressed genes (DEGs) from CvsSt analysis. All significant DEGs (adjusted p-value <0.05, |log2(FC)| >2) are displayed.
Analysis	Ensembl ID	BaseMean	Log2FoldChange	lfcSE	Stat	p-value	padj	Target	Name	Description
CvsSt	ENSSSCG00000000010	31.434	3.43663	0.708615	4.84979	1.23593e-06	2.2186e-05	100519144	FBLN1	fibulin 1 [Source:VGNC Symbol;Acc:VGNC:103280]
CvsSt	ENSSSCG00000000020	73.7136	3.50411	0.712426	4.91856	8.71812e-07	1.64854e-05	100522673	PHF21B	PHD finger protein 21B [Source:VGNC Symbol;Acc:VGNC:91385]
CvsSt	ENSSSCG00000000029	44.2586	2.38072	0.665022	3.57992	0.000343703	0.00228714	100524621	SCUBE1	signal peptide, CUB domain and EGF like domain containing 1 [Source:VGNC Symbol;Acc:VGNC:92650]
CvsSt	ENSSSCG00000000040	311.361	2.94051	0.70066	4.19676	2.70755e-05	0.000287488	100157034	SEPTIN3	septin 3 [Source:VGNC Symbol;Acc:VGNC:92722]
CvsSt	ENSSSCG00000000046	15.2495	2.66836	0.746854	3.5728	0.00035319	0.00233472	397687	CYP2D6	cytochrome P450 family 2 subfamily D member 6 [Source:VGNC Symbol;Acc:VGNC:103547]
CvsSt	ENSSSCG00000000062	1759.92	10.7422	1.1457	9.37614	6.84327e-21	1.64455e-18	100153407	CSDC2	cold shock domain containing C2 [Source:VGNC Symbol;Acc:VGNC:87028]
CvsSt	ENSSSCG00000000078	396.934	2.23014	0.579814	3.8463	0.000119916	0.000975831	102159442	TNRC6B	trinucleotide repeat containing adaptor 6B [Source:VGNC Symbol;Acc:VGNC:94293]
CvsSt	ENSSSCG00000000082	11.4839	2.39927	0.92849	2.58406	0.00976458	0.0317835	100154640	CACNA1I	calcium voltage-gated channel subunit alpha1 I [Source:VGNC Symbol;Acc:VGNC:97908]
CvsSt	ENSSSCG00000000121	6.55844	5.34228	1.62382	3.28995	0.00100204	0.00536787	100623444	GALR3	galanin receptor 3 [Source:VGNC Symbol;Acc:VGNC:88341]
CvsSt	ENSSSCG00000000133	2468	4.68975	0.830204	5.64892	1.61463e-08	5.29427e-07	100153230	TST	thiosulfate sulfurtransferase [Source:VGNC Symbol;Acc:VGNC:94529]
CvsSt	ENSSSCG00000000142	142.545	2.40756	0.627333	3.83777	0.000124157	0.0010026	100513010	FOXRED2	FAD dependent oxidoreductase domain containing 2 [Source:VGNC Symbol;Acc:VGNC:88229]
CvsSt	ENSSSCG00000000182	120.36	3.25276	0.763746	4.25895	2.05386e-05	0.000228695	100126276	WNT10B	Wnt family member 10B [Source:VGNC Symbol;Acc:VGNC:94965]
CvsSt	ENSSSCG00000000189	1446.85	2.07816	0.471125	4.41105	1.02872e-05	0.000127899	100525991	LMBR1L	limb development membrane protein 1 like [Source:VGNC Symbol;Acc:VGNC:89753]
CvsSt	ENSSSCG00000000223	16.4289	2.55908	0.999966	2.55917	0.0104923	0.0335971	100519772	BIN2	bridging integrator 2 [Source:VGNC Symbol;Acc:VGNC:85825]
CvsSt	ENSSSCG00000000235	2546.66	8.12553	0.86474	9.3965	5.64058e-21	1.39073e-18	100523843	KRT82	keratin 82 [Source:VGNC Symbol;Acc:VGNC:89598]
CvsSt	ENSSSCG00000000238	62.083	8.49165	1.63232	5.20219	1.96955e-07	4.69543e-06
CvsSt	ENSSSCG00000000239	212922	10.9223	0.821539	13.2949	2.47849e-40	2.76789e-37	100523670	ENSSSCG00000000239
CvsSt	ENSSSCG00000000240	132436	10.3155	0.721128	14.3047	2.04585e-46	3.53095e-43	100524022	KRT85	keratin 85 [Source:HGNC Symbol;Acc:HGNC:6462]
CvsSt	ENSSSCG00000000241	12103	10.205	1.67667	6.08646	1.15433e-09	5.15892e-08	100622023	KRT84	keratin 84 [Source:VGNC Symbol;Acc:VGNC:89599]
CvsSt	ENSSSCG00000000247	124779	8.00803	0.882844	9.07072	1.18238e-19	2.55085e-17	106506651	KRT71	keratin 71 [Source:HGNC Symbol;Acc:HGNC:28927]
CvsSt	ENSSSCG00000000249	1981.4	9.45192	0.983833	9.60724	7.45181e-22	2.08048e-19	733618	KRT72	keratin 72 [Source:HGNC Symbol;Acc:HGNC:28932]
CvsSt	ENSSSCG00000000279	651.505	2.86197	0.498063	5.7462	9.12692e-09	3.25093e-07	100518969	ENSSSCG00000000279	homeobox C13 [Source:VGNC Symbol;Acc:VGNC:88951]
CvsSt	ENSSSCG00000000292	1424.6	2.88431	0.611146	4.7195	2.36421e-06	3.81671e-05	100736804	ENSSSCG00000000292	zinc finger protein 385A [Source:VGNC Symbol;Acc:VGNC:95233]
CvsSt	ENSSSCG00000000297	20.2594	2.76838	0.736163	3.76056	0.000169535	0.00129262	100521662	ENSSSCG00000000297	phosphodiesterase 1B [Source:VGNC Symbol;Acc:VGNC:91249]
CvsSt	ENSSSCG00000000363	191.088	2.48571	0.548497	4.53186	5.84656e-06	8.03162e-05	397254	ENSSSCG00000000363	growth differentiation factor 11 [Source:VGNC Symbol;Acc:VGNC:88398]
CvsSt	ENSSSCG00000000371	2713.7	8.2946	1.39507	5.94566	2.75344e-09	1.11459e-07	100626164	ENSSSCG00000000371	premelanosome protein [Source:VGNC Symbol;Acc:VGNC:91587]
CvsSt	ENSSSCG00000000377	14195.4	2.18976	0.471488	4.64435	3.41145e-06	5.12798e-05	100737962	ENSSSCG00000000377
CvsSt	ENSSSCG00000000437	26.1203	3.27984	0.814777	4.02545	5.68664e-05	0.000527926	100518732	ARHGAP9	Rho GTPase activating protein 9 [Source:VGNC Symbol;Acc:VGNC:85482]
CvsSt	ENSSSCG00000000464	40.5506	2.87192	0.710596	4.04157	5.30943e-05	0.000499502	100737998	C12orf56	chromosome 5 C12orf56 homolog [Source:VGNC Symbol;Acc:VGNC:86044]
CvsSt	ENSSSCG00000000493	1619.79	2.65841	0.573932	4.63192	3.6229e-06	5.38612e-05	100517823	FRS2	fibroblast growth factor receptor substrate 2 [Source:VGNC Symbol;Acc:VGNC:88246]
CvsSt	ENSSSCG00000000521	65.7246	2.99337	0.516485	5.79565	6.80574e-09	2.49233e-07	100523904	PHLDA1	pleckstrin homology like domain family A member 1 [Source:VGNC Symbol;Acc:VGNC:91396]
CvsSt	ENSSSCG00000000531	2.41153	4.14187	1.68609	2.4565	0.0140298	0.0420386	100511132	BICD1	BICD cargo adaptor 1 [Source:VGNC Symbol;Acc:VGNC:85818]
CvsSt	ENSSSCG00000000619	530.786	2.46687	0.662074	3.72598	0.000194561	0.00144174	100514349	FAM234B	family with sequence similarity 234 member B [Source:VGNC Symbol;Acc:VGNC:87964]
CvsSt	ENSSSCG00000000625	1869.61	2.59713	0.566294	4.5862	4.51396e-06	6.48242e-05	100515777	LRP6	LDL receptor related protein 6 [Source:VGNC Symbol;Acc:VGNC:89821]
CvsSt	ENSSSCG00000000660	46.64	5.30946	0.996258	5.32941	9.85334e-08	2.55904e-06	403166	A2M	alpha-2-macroglobulin [Source:VGNC Symbol;Acc:VGNC:103209]
CvsSt	ENSSSCG00000000672	198.051	6.70972	0.833228	8.05268	8.10021e-16	1.25026e-13	100511695	CLSTN3	calsyntenin 3 [Source:VGNC Symbol;Acc:VGNC:86786]
CvsSt	ENSSSCG00000000687	9.02433	4.39496	1.66844	2.63418	0.00843407	0.0284305	404704	CD4	CD4 molecule [Source:VGNC Symbol;Acc:VGNC:86417]
CvsSt	ENSSSCG00000000712	141.843	4.52831	0.656992	6.8925	5.48217e-12	4.41013e-10	100521792	VWF	von Willebrand factor [Source:NCBI gene (formerly Entrezgene);Acc:399543]
CvsSt	ENSSSCG00000000732	111.388	4.47269	0.933145	4.79314	1.64192e-06	2.7982e-05	100625935	CRACR2A	calcium release activated channel regulator 2A [Source:VGNC Symbol;Acc:VGNC:86974]
CvsSt	ENSSSCG00000000734	7.11302	6.10704	1.86682	3.27136	0.00107033	0.00565551	100514841	TSPAN11	tetraspanin 11 [Source:VGNC Symbol;Acc:VGNC:94500]
CvsSt	ENSSSCG00000000748	6.93149	5.60394	1.85204	3.02582	0.00247958	0.0109783	100515547	IQSEC3	IQ motif and Sec7 domain ArfGEF 3 [Source:VGNC Symbol;Acc:VGNC:89196]
CvsSt	ENSSSCG00000000749	25.6518	7.81626	1.89428	4.12624	3.68742e-05	0.00037237	100512716	SLC6A12	solute carrier family 6 member 12 [Source:VGNC Symbol;Acc:VGNC:93155]
CvsSt	ENSSSCG00000000760	2.85854	4.7448	1.87003	2.53729	0.0111713	0.0352898	100514647	LRTM2	leucine rich repeats and transmembrane domains 2 [Source:VGNC Symbol;Acc:VGNC:89866]
CvsSt	ENSSSCG00000000837	364.699	2.87183	0.602141	4.76936	1.84811e-06	3.08588e-05	100157186	CHST11	carbohydrate sulfotransferase 11 [Source:VGNC Symbol;Acc:VGNC:86675]
CvsSt	ENSSSCG00000000843	14301.8	5.3471	0.782626	6.83226	8.35875e-12	6.42474e-10	396681	TXNRD1	thioredoxin reductase 1 [Source:NCBI gene (formerly Entrezgene);Acc:396681]
CvsSt	ENSSSCG00000000854	9.92732	4.81005	1.65873	2.89984	0.00373358	0.0151102	100521556	ENSSSCG00000000854
CvsSt	ENSSSCG00000000856	7.25383	5.10896	1.86095	2.74535	0.00604461	0.0218501	100521900	PAH	phenylalanine hydroxylase [Source:VGNC Symbol;Acc:VGNC:91155]
CvsSt	ENSSSCG00000000874	77.7568	2.96594	0.487307	6.08639	1.15488e-09	5.15892e-08	100154381	GAS2L3	growth arrest specific 2 like 3 [Source:VGNC Symbol;Acc:VGNC:88357]
CvsSt	ENSSSCG00000000875	7.24398	4.62946	1.68336	2.75013	0.00595723	0.0215918	100153960	NR1H4	nuclear receptor subfamily 1 group H member 4 [Source:VGNC Symbol;Acc:VGNC:90872]
CvsSt	ENSSSCG00000000950	22.085	2.05536	0.824424	2.49309	0.0126638	0.038903	100154851	E2F7	E2F transcription factor 7 [Source:VGNC Symbol;Acc:VGNC:87518]
CvsSt	ENSSSCG00000001000	1338.57	2.18577	0.647599	3.37519	0.00073765	0.00421615	100134957	ECI2	enoyl-CoA delta isomerase 2 [Source:VGNC Symbol;Acc:VGNC:87532]
CvsSt	ENSSSCG00000001096	9.76703	6.17874	1.60078	3.85984	0.000113463	0.000936143	100516325	ARMH2	armadillo like helical domain containing 2 [Source:VGNC Symbol;Acc:VGNC:85533]
CvsSt	ENSSSCG00000001097	36.0809	2.50069	0.678975	3.68303	0.000230475	0.00166119	100154661	ENSSSCG00000001097	RHO family interacting cell polarization regulator 2 [Source:VGNC Symbol;Acc:VGNC:92322]
CvsSt	ENSSSCG00000001107	4.64713	4.54422	1.62611	2.79453	0.00519752	0.0194127	397621	SLC17A1	solute carrier family 17 member 1 [Source:VGNC Symbol;Acc:VGNC:92950]
CvsSt	ENSSSCG00000001137	96.9147	2.22941	0.606947	3.67315	0.000239579	0.00170672
CvsSt	ENSSSCG00000001347	1149.55	2.76369	0.465186	5.94103	2.83231e-09	1.13923e-07	100144450	PPP1R10	protein phosphatase 1 regulatory subunit 10 [Source:VGNC Symbol;Acc:VGNC:91717]
CvsSt	ENSSSCG00000001433	578.038	2.47092	0.498771	4.95402	7.26956e-07	1.41842e-05	100144537	ENSSSCG00000001433	palmitoyl-protein thioesterase 2 [Source:NCBI gene (formerly Entrezgene);Acc:100144537]
CvsSt	ENSSSCG00000001473	4.57071	4.62608	1.90665	2.42629	0.0152539	0.0449334	100520915	COL11A2	collagen type XI alpha 2 chain [Source:VGNC Symbol;Acc:VGNC:86863]
CvsSt	ENSSSCG00000001484	12.896	4.89398	1.69516	2.88702	0.00388909	0.0155547	100153159	TINAG	tubulointerstitial nephritis antigen [Source:VGNC Symbol;Acc:VGNC:93998]
CvsSt	ENSSSCG00000001498	21.5243	4.61318	1.47168	3.13463	0.00172069	0.00826865	100153820	BEND6	BEN domain containing 6 [Source:VGNC Symbol;Acc:VGNC:85802]
CvsSt	ENSSSCG00000001510	9.63773	3.60409	1.10034	3.27545	0.00105493	0.00559752	100154627	KIFC1	kinesin family member C1 [Source:VGNC Symbol;Acc:VGNC:89477]
CvsSt	ENSSSCG00000001513	96.4277	2.91111	0.54244	5.36669	8.0193e-08	2.13829e-06	100525524	SYNGAP1	synaptic Ras GTPase activating protein 1 [Source:VGNC Symbol;Acc:VGNC:93664]
CvsSt	ENSSSCG00000001523	20.5584	5.02975	1.15759	4.34502	1.39264e-05	0.000164526	100152616	GRM4	glutamate metabotropic receptor 4 [Source:VGNC Symbol;Acc:VGNC:98027]
CvsSt	ENSSSCG00000001539	1465.79	2.51384	0.558005	4.50504	6.63596e-06	8.89087e-05	397297	PPARD	peroxisome proliferator activated receptor delta [Source:VGNC Symbol;Acc:VGNC:91683]
CvsSt	ENSSSCG00000001559	447.863	2.81666	0.371261	7.58675	3.2804e-14	3.99221e-12	100154642	PNPLA1	patatin like phospholipase domain containing 1 [Source:VGNC Symbol;Acc:VGNC:91606]
CvsSt	ENSSSCG00000001567	135.833	2.84939	0.775615	3.67372	0.000239047	0.00170421	100152591	CPNE5	copine 5 [Source:VGNC Symbol;Acc:VGNC:86953]
CvsSt	ENSSSCG00000001589	4.55963	5.18691	1.76073	2.94588	0.00322039	0.0135076	100154059	GLP1R	glucagon like peptide 1 receptor [Source:VGNC Symbol;Acc:VGNC:88489]
CvsSt	ENSSSCG00000001597	54.1727	5.02068	1.19229	4.21095	2.54297e-05	0.000273376	100153249	LRFN2	leucine rich repeat and fibronectin type III domain containing 2 [Source:VGNC Symbol;Acc:VGNC:89805]
CvsSt	ENSSSCG00000001620	272.48	2.511	0.561411	4.47266	7.72526e-06	0.000100504	100152701	MDFI	MyoD family inhibitor [Source:VGNC Symbol;Acc:VGNC:90088]
CvsSt	ENSSSCG00000001637	66.773	3.25058	0.567727	5.72561	1.03061e-08	3.59671e-07	102167816	GUCA1B	guanylate cyclase activator 1B [Source:VGNC Symbol;Acc:VGNC:88747]
CvsSt	ENSSSCG00000001660	829.74	2.07055	0.372554	5.55773	2.73302e-08	8.49204e-07	100153873	PTK7	protein tyrosine kinase 7 (inactive) [Source:HGNC Symbol;Acc:HGNC:9618]
CvsSt	ENSSSCG00000001676	11.7528	5.0132	1.51549	3.30798	0.000939707	0.00511331	100736626	LRRC73	leucine rich repeat containing 73 [Source:VGNC Symbol;Acc:VGNC:89854]
CvsSt	ENSSSCG00000001689	1714.3	2.38815	0.584515	4.0857	4.39442e-05	0.000430264	100514413	GTPBP2	GTP binding protein 2 [Source:VGNC Symbol;Acc:VGNC:88743]
CvsSt	ENSSSCG00000001710	413.553	4.25849	0.781111	5.45183	4.98532e-08	1.40009e-06	100737965	RUNX2	RUNX family transcription factor 2 [Source:VGNC Symbol;Acc:VGNC:92517]
CvsSt	ENSSSCG00000001723	37.0068	2.86312	1.10355	2.59445	0.00947411	0.0310114	396593	PLA2G7	phospholipase A2 group VII [Source:VGNC Symbol;Acc:VGNC:91501]
CvsSt	ENSSSCG00000001725	8.32244	5.35658	1.86731	2.86861	0.00412275	0.0162758	100152930	ADGRF5	adhesion G protein-coupled receptor F5 [Source:HGNC Symbol;Acc:HGNC:19030]
CvsSt	ENSSSCG00000001734	13.088	2.00398	0.668387	2.99823	0.0027155	0.0117837
CvsSt	ENSSSCG00000001770	1979.58	2.00129	0.507669	3.94212	8.07638e-05	0.00070482	396969	CTSH	cathepsin H [Source:VGNC Symbol;Acc:VGNC:87077]
CvsSt	ENSSSCG00000001808	3.6645	5.08926	2.06674	2.46246	0.0137989	0.0415096	100048944	CPEB1	cytoplasmic polyadenylation element binding protein 1 [Source:NCBI gene (formerly Entrezgene);Acc:100048944]
CvsSt	ENSSSCG00000001835	2211.71	5.05139	0.720434	7.01159	2.35626e-12	2.08063e-10	100153434	ABHD2	abhydrolase domain containing 2, acylglycerol lipase [Source:VGNC Symbol;Acc:VGNC:84980]
CvsSt	ENSSSCG00000001836	2270.25	2.13135	0.541445	3.93641	8.27081e-05	0.000718482	100521278	RLBP1	retinaldehyde binding protein 1 [Source:VGNC Symbol;Acc:VGNC:92327]
CvsSt	ENSSSCG00000001841	130.363	2.49053	0.674494	3.69244	0.000222113	0.0016123	733644	RHCG	Rh family C glycoprotein [Source:NCBI gene (formerly Entrezgene);Acc:733644]
CvsSt	ENSSSCG00000001848	82.0361	2.61866	0.645882	4.0544	5.02639e-05	0.000479769	100153433	MESP2	mesoderm posterior bHLH transcription factor 2 [Source:VGNC Symbol;Acc:VGNC:90149]
CvsSt	ENSSSCG00000001849	59.768	3.89316	0.983806	3.95724	7.58204e-05	0.000669823	397520	ANPEP	alanyl aminopeptidase, membrane [Source:VGNC Symbol;Acc:VGNC:85362]
CvsSt	ENSSSCG00000001863	185.086	5.30478	0.851925	6.22682	4.76006e-10	2.34727e-08	100152648	TMEM266	transmembrane protein 266 [Source:VGNC Symbol;Acc:VGNC:94166]
CvsSt	ENSSSCG00000001866	8065.11	2.01543	0.538725	3.74111	0.000183207	0.00137207	100153840	RCN2	reticulocalbin 2 [Source:VGNC Symbol;Acc:VGNC:92181]
CvsSt	ENSSSCG00000001867	744.507	3.90015	0.757034	5.15189	2.57879e-07	5.91285e-06	100152628	PSTPIP1	proline-serine-threonine phosphatase interacting protein 1 [Source:VGNC Symbol;Acc:VGNC:91935]
CvsSt	ENSSSCG00000001895	9.01194	4.75778	1.6474	2.88805	0.00387638	0.0155227	100520917	CPLX3	complexin 3 [Source:VGNC Symbol;Acc:VGNC:86945]
CvsSt	ENSSSCG00000001899	255.571	2.02247	0.699808	2.89004	0.00385192	0.0154596	100158128	LMAN1L	lectin, mannose binding 1 like [Source:VGNC Symbol;Acc:VGNC:89749]
CvsSt	ENSSSCG00000001905	578.366	2.41741	0.564407	4.28309	1.84314e-05	0.00020991	100521805	ARID3B	AT-rich interaction domain 3B [Source:VGNC Symbol;Acc:VGNC:85508]
CvsSt	ENSSSCG00000001914	18.9512	5.90233	1.55131	3.80475	0.000141949	0.00111868	100154899	LOXL1	lysyl oxidase like 1 [Source:VGNC Symbol;Acc:VGNC:89780]
CvsSt	ENSSSCG00000001916	50.573	4.53508	0.719788	6.30058	2.96541e-10	1.53944e-08	100156505	INSYN1	inhibitory synaptic factor 1 [Source:VGNC Symbol;Acc:VGNC:89155]
CvsSt	ENSSSCG00000001939	5.15206	5.45827	1.61269	3.38458	0.000712881	0.00411369	100625559	TTC6	tetratricopeptide repeat domain 6 [Source:VGNC Symbol;Acc:VGNC:94556]
CvsSt	ENSSSCG00000001958	5372.39	2.38111	0.558604	4.26261	2.02052e-05	0.000225748	100151954	BAZ1A	bromodomain adjacent to zinc finger domain 1A [Source:VGNC Symbol;Acc:VGNC:85761]
CvsSt	ENSSSCG00000002032	953.109	3.67493	0.573455	6.4084	1.47055e-10	8.33387e-09	100522330	SLC7A8	solute carrier family 7 member 8 [Source:VGNC Symbol;Acc:VGNC:93176]
CvsSt	ENSSSCG00000002037	112.865	2.57108	0.569721	4.51287	6.39555e-06	8.65897e-05	100156315	CDH24	cadherin 24 [Source:VGNC Symbol;Acc:VGNC:86485]
CvsSt	ENSSSCG00000002241	21.9141	5.64499	1.56008	3.61841	0.000296423	0.00203005	100154145	NUTM1	NUT midline carcinoma family member 1 [Source:HGNC Symbol;Acc:HGNC:29919]
CvsSt	ENSSSCG00000002263	248.656	2.56018	0.646922	3.95747	7.57465e-05	0.000669482	100156054	SLCO3A1	solute carrier organic anion transporter family member 3A1 [Source:VGNC Symbol;Acc:VGNC:93197]
CvsSt	ENSSSCG00000002275	256.849	3.36655	0.666063	5.0544	4.31752e-07	9.1687e-06	100157071	PPP1R36	protein phosphatase 1 regulatory subunit 36 [Source:VGNC Symbol;Acc:VGNC:91734]
CvsSt	ENSSSCG00000002277	447.229	2.21287	0.459246	4.81848	1.44653e-06	2.52254e-05	100154659	SPTB	spectrin beta, erythrocytic [Source:VGNC Symbol;Acc:VGNC:93435]
CvsSt	ENSSSCG00000002279	2763.07	3.18502	0.507155	6.28017	3.38204e-10	1.74478e-08	767625	GPX2	glutathione peroxidase 2 [Source:VGNC Symbol;Acc:VGNC:88653]
CvsSt	ENSSSCG00000002280	836.757	2.32117	0.467875	4.96108	7.01015e-07	1.37915e-05	100512115	RAB15	RAB15, member RAS onco family [Source:VGNC Symbol;Acc:VGNC:98239]
CvsSt	ENSSSCG00000002297	2629.78	2.28764	0.335506	6.8185	9.19982e-12	7.0144e-10	100153020	RDH12	retinol dehydrogenase 12 [Source:VGNC Symbol;Acc:VGNC:96760]
CvsSt	ENSSSCG00000002306	42.7528	2.26074	0.693959	3.25774	0.00112305	0.00587358	100513992	GALNT16	polypeptide N-acetylgalactosaminyltransferase 16 [Source:VGNC Symbol;Acc:VGNC:88332]
CvsSt	ENSSSCG00000002309	143.841	6.66881	1.05339	6.33082	2.43855e-10	1.286e-08	100156934	PLEKHD1	pleckstrin homology and coiled-coil domain containing D1 [Source:VGNC Symbol;Acc:VGNC:91539]
CvsSt	ENSSSCG00000002333	8.12696	2.97198	1.13704	2.61378	0.0089547	0.0297139	100156555	DPF3	double PHD fingers 3 [Source:VGNC Symbol;Acc:VGNC:87414]
CvsSt	ENSSSCG00000002389	88.1997	3.17774	0.455631	6.97436	3.07271e-12	2.60782e-10	100511141	VASH1	vasohibin 1 [Source:VGNC Symbol;Acc:VGNC:94801]
CvsSt	ENSSSCG00000002391	4.10457	4.9205	1.63834	3.00334	0.00267038	0.0116315	100153134	LRRC74A	leucine rich repeat containing 74A [Source:VGNC Symbol;Acc:VGNC:89855]
CvsSt	ENSSSCG00000002398	280.638	2.54137	0.460894	5.51401	3.50745e-08	1.04371e-06	102158165	TMEM63C	transmembrane protein 63C [Source:VGNC Symbol;Acc:VGNC:94198]
CvsSt	ENSSSCG00000002405	5.41774	3.76456	1.5555	2.42016	0.0155139	0.04549	100518382	ENSSSCG00000002405
CvsSt	ENSSSCG00000002436	110.058	7.07745	1.2516	5.65472	1.561e-08	5.14507e-07	100154890	TTC7B	tetratricopeptide repeat domain 7B [Source:VGNC Symbol;Acc:VGNC:94558]
CvsSt	ENSSSCG00000002440	124.114	2.54056	0.628225	4.04402	5.25417e-05	0.000495286	100152429	CCDC88C	coiled-coil domain containing 88C [Source:VGNC Symbol;Acc:VGNC:97917]
CvsSt	ENSSSCG00000002450	26.0216	4.94852	2.05058	2.41323	0.015812	0.0461549	100156914	SLC24A4	solute carrier family 24 member 4 [Source:VGNC Symbol;Acc:VGNC:92988]
CvsSt	ENSSSCG00000002464	8.59784	2.34073	0.894643	2.61638	0.0088868	0.0295578	102167492	ENSSSCG00000002464
CvsSt	ENSSSCG00000002469	9537.67	7.00662	0.792034	8.84636	9.04229e-19	1.69968e-16	100151873	OTUB2	OTU deubiquitinase, ubiquitin aldehyde binding 2 [Source:VGNC Symbol;Acc:VGNC:91098]
CvsSt	ENSSSCG00000002495	315.315	3.37425	0.492056	6.85746	7.00967e-12	5.49911e-10	100525411	SYNE3	spectrin repeat containing nuclear envelope family member 3 [Source:VGNC Symbol;Acc:VGNC:98353]
CvsSt	ENSSSCG00000002506	837.821	2.33019	0.567587	4.10544	4.0355e-05	0.0004013	100157930	VRK1	VRK serine/threonine kinase 1 [Source:VGNC Symbol;Acc:VGNC:98408]
CvsSt	ENSSSCG00000002544	1034.18	2.71339	0.561502	4.83237	1.34918e-06	2.38272e-05	100521849	PPP1R13B	protein phosphatase 1 regulatory subunit 13B [Source:VGNC Symbol;Acc:VGNC:91721]
CvsSt	ENSSSCG00000002547	6925.21	2.25444	0.483131	4.66631	3.06658e-06	4.7054e-05	100523621	ENSSSCG00000002547
CvsSt	ENSSSCG00000002639	287.486	5.11831	0.73852	6.93049	4.19371e-12	3.44665e-10
CvsSt	ENSSSCG00000002669	271.736	4.06489	0.764274	5.31863	1.04553e-07	2.6946e-06	100625354	CRISPLD2	cysteine rich secretory protein LCCL domain containing 2 [Source:VGNC Symbol;Acc:VGNC:96958]
CvsSt	ENSSSCG00000002688	195.855	2.29205	0.422477	5.42525	5.78725e-08	1.59464e-06	100518663	PLCG2	phospholipase C gamma 2 [Source:VGNC Symbol;Acc:VGNC:91520]
CvsSt	ENSSSCG00000002690	595.673	2.23336	0.470361	4.74818	2.05254e-06	3.37541e-05	100518489	GAN	gigaxonin [Source:VGNC Symbol;Acc:VGNC:88343]
CvsSt	ENSSSCG00000002706	426.545	2.8465	0.609139	4.67298	2.96857e-06	4.57454e-05	100521793	ADAT1	adenosine deaminase tRNA specific 1 [Source:VGNC Symbol;Acc:VGNC:85099]
CvsSt	ENSSSCG00000002708	298.739	3.46446	0.586559	5.90641	3.49653e-09	1.37436e-07	100522137	TMEM231	transmembrane protein 231 [Source:VGNC Symbol;Acc:VGNC:98377]
CvsSt	ENSSSCG00000002709	44.5809	2.89735	0.650807	4.45193	8.51001e-06	0.000108796	100522551	ENSSSCG00000002709
CvsSt	ENSSSCG00000002712	608.861	2.6431	0.583505	4.52969	5.90691e-06	8.09111e-05	100523064	LDHD	lactate dehydrogenase D [Source:VGNC Symbol;Acc:VGNC:89670]
CvsSt	ENSSSCG00000002737	13.9576	5.60996	1.6994	3.30114	0.000962929	0.00519944	106510480	CHST4	carbohydrate sulfotransferase 4 [Source:VGNC Symbol;Acc:VGNC:86680]
CvsSt	ENSSSCG00000002764	1610.57	3.40998	0.877144	3.88759	0.000101244	0.000854272	100518128	SMPD3	sphingomyelin phosphodiesterase 3 [Source:VGNC Symbol;Acc:VGNC:93263]
CvsSt	ENSSSCG00000002767	180.428	2.68544	0.781258	3.43732	0.000587494	0.0035207	100520430	TSNAXIP1	translin associated factor X interacting protein 1 [Source:VGNC Symbol;Acc:VGNC:94497]
CvsSt	ENSSSCG00000002782	21.2904	7.10353	1.68966	4.20411	2.6211e-05	0.000280031	100524497	PLEKHG4	pleckstrin homology and RhoGEF domain containing G4 [Source:VGNC Symbol;Acc:VGNC:91545]
CvsSt	ENSSSCG00000002783	149.476	4.07995	0.769272	5.30365	1.13511e-07	2.91216e-06	396753	SLC9A5	solute carrier family 9 member A5 [Source:VGNC Symbol;Acc:VGNC:93187]
CvsSt	ENSSSCG00000002792	21.1391	2.54759	0.588335	4.33017	1.48995e-05	0.000174609	100523672	HSF4	heat shock transcription factor 4 [Source:HGNC Symbol;Acc:HGNC:5227]
CvsSt	ENSSSCG00000002802	877.721	2.57243	0.791289	3.25094	0.00115026	0.00598784	100512472	GINS3	GINS complex subunit 3 [Source:VGNC Symbol;Acc:VGNC:88452]
CvsSt	ENSSSCG00000002838	2.96814	4.30285	1.65648	2.59758	0.0093884	0.0308105	100520077	ZNF423	zinc finger protein 423 [Source:VGNC Symbol;Acc:VGNC:98752]
CvsSt	ENSSSCG00000002847	5478.54	2.55445	0.542001	4.713	2.44095e-06	3.91398e-05	100521318	GPT2	glutamic--pyruvic transaminase 2 [Source:VGNC Symbol;Acc:VGNC:88651]
CvsSt	ENSSSCG00000002852	14.8397	3.62468	1.30939	2.76822	0.00563637	0.0207075	100522869	PLEKHF1	pleckstrin homology and FYVE domain containing 1 [Source:VGNC Symbol;Acc:VGNC:91540]
CvsSt	ENSSSCG00000002916	86.1165	3.01094	0.540098	5.5748	2.47808e-08	7.77625e-07	100524259	APLP1	amyloid beta like protein 1 [Source:VGNC Symbol;Acc:VGNC:85413]
CvsSt	ENSSSCG00000002929	26.0232	4.74474	1.32082	3.59226	0.000327822	0.00220386	100521795	SYNE4	spectrin repeat containing nuclear envelope family member 4 [Source:VGNC Symbol;Acc:VGNC:93663]
CvsSt	ENSSSCG00000002967	20344.2	3.81317	0.72608	5.25172	1.50689e-07	3.68892e-06	100517656	ENSSSCG00000002967	calpain 12 [Source:VGNC Symbol;Acc:VGNC:86172]
CvsSt	ENSSSCG00000002977	11.5603	6.77726	1.93824	3.4966	0.000471221	0.00294474	396758	SPMI	seminal plasma sperm motility inhibitor/spermadhesin AQN-3-like protein [Source:NCBI gene (formerly Entrezgene);Acc:396758]
CvsSt	ENSSSCG00000002994	14.4098	3.03056	0.732633	4.13654	3.52586e-05	0.000357959	100523190	CYP2F1	cytochrome P450 family 2 subfamily F member 1 [Source:VGNC Symbol;Acc:VGNC:103348]
CvsSt	ENSSSCG00000002997	11.1566	4.17389	1.17493	3.55245	0.000381661	0.00248656	100523846	ENSSSCG00000002997	MIA SH3 domain containing [Source:VGNC Symbol;Acc:VGNC:98501]
CvsSt	ENSSSCG00000003018	23.2902	2.5801	0.669494	3.85381	0.000116293	0.000954531	397583	LIPE	lipase E, hormone sensitive type [Source:VGNC Symbol;Acc:VGNC:98493]
CvsSt	ENSSSCG00000003051	11.0199	2.93726	1.03185	2.84661	0.00441875	0.0171659	100519153	CD177	CD177 molecule [Source:VGNC Symbol;Acc:VGNC:86391]
CvsSt	ENSSSCG00000003059	337.546	3.58717	0.799264	4.48809	7.18635e-06	9.4745e-05	100519901	ZNF428	zinc finger protein 428 [Source:VGNC Symbol;Acc:VGNC:95238]
CvsSt	ENSSSCG00000003069	763.204	9.55498	1.15939	8.24135	1.70277e-16	2.78682e-14	397081	KCNN4	potassium calcium-activated channel subfamily N member 4 [Source:VGNC Symbol;Acc:VGNC:89381]
CvsSt	ENSSSCG00000003088	255.898	3.10307	0.706661	4.39118	1.1274e-05	0.000138088	397576	APOE	apolipoprotein E [Source:NCBI gene (formerly Entrezgene);Acc:397576]
CvsSt	ENSSSCG00000003105	4320.03	6.77782	0.894773	7.57491	3.59373e-14	4.34567e-12	641348	SLC1A5	solute carrier family 1 member 5 [Source:VGNC Symbol;Acc:VGNC:92967]
CvsSt	ENSSSCG00000003113	24.9995	4.58761	1.13265	4.05033	5.11463e-05	0.000485993	100515612	C5AR2	complement component 5a receptor 2 [Source:VGNC Symbol;Acc:VGNC:86039]
CvsSt	ENSSSCG00000003146	173.256	2.91257	0.584911	4.97952	6.37437e-07	1.27212e-05	100524377	NTN5	netrin 5 [Source:VGNC Symbol;Acc:VGNC:90934]
CvsSt	ENSSSCG00000003147	10.7608	2.77292	0.878966	3.15475	0.00160634	0.00783164	445526	CA11	carbonic anhydrase 11 [Source:VGNC Symbol;Acc:VGNC:96933]
CvsSt	ENSSSCG00000003149	65.2892	2.31605	0.780965	2.96563	0.00302063	0.0128387	100511262	TULP2	TUB like protein 2 [Source:VGNC Symbol;Acc:VGNC:94590]
CvsSt	ENSSSCG00000003155	6252.54	3.67473	0.834856	4.40163	1.07442e-05	0.000132282	100522679	PPP1R15A	protein phosphatase 1 regulatory subunit 15A [Source:VGNC Symbol;Acc:VGNC:91725]
CvsSt	ENSSSCG00000003159	2.44568	4.3182	1.62959	2.64987	0.00805224	0.0274062	100623314	KCNA7	potassium voltage-gated channel subfamily A member 7 [Source:VGNC Symbol;Acc:VGNC:89327]
CvsSt	ENSSSCG00000003172	8.95386	3.02323	0.984004	3.07237	0.00212365	0.00970768	100515317	KASH5	KASH domain containing 5 [Source:VGNC Symbol;Acc:VGNC:86267]
CvsSt	ENSSSCG00000003199	1931.75	2.12646	0.622483	3.4161	0.000635251	0.00375475	100520250	AP2A1	adaptor related protein complex 2 subunit alpha 1 [Source:VGNC Symbol;Acc:VGNC:85383]
CvsSt	ENSSSCG00000003228	180.796	3.09341	0.665769	4.64638	3.37817e-06	5.09813e-05	100624916	VSIG10L	V-set and immunoglobulin domain containing 10 like [Source:VGNC Symbol;Acc:VGNC:94867]
CvsSt	ENSSSCG00000003238	51.3554	2.05651	0.669518	3.07163	0.00212896	0.00972527
CvsSt	ENSSSCG00000003239	57.4448	2.01388	0.46452	4.3354	1.45497e-05	0.000171038	100191062	HAS1	hyaluronan synthase 1 [Source:VGNC Symbol;Acc:VGNC:88786]
CvsSt	ENSSSCG00000003255	4.28017	4.97444	1.58696	3.13456	0.0017211	0.00826865
CvsSt	ENSSSCG00000003271	38.9444	2.92448	0.750307	3.89772	9.71035e-05	0.000823731	100524682	ENSSSCG00000003271	tweety family member 1 [Source:VGNC Symbol;Acc:VGNC:94574]
CvsSt	ENSSSCG00000003318	2.81793	4.74742	1.69921	2.79389	0.00520783	0.0194359	396772	GALP	galanin like peptide [Source:VGNC Symbol;Acc:VGNC:88338]
CvsSt	ENSSSCG00000003336	38.7634	2.09506	0.578698	3.6203	0.000294258	0.00201824	102166129	ENSSSCG00000003336	tubulin tyrosine ligase like 10 [Source:VGNC Symbol;Acc:VGNC:94567]
CvsSt	ENSSSCG00000003371	15.5501	3.95296	0.970108	4.07477	4.60608e-05	0.000446155	100515319	GPR153	G protein-coupled receptor 153 [Source:VGNC Symbol;Acc:VGNC:88609]
CvsSt	ENSSSCG00000003377	699.267	2.45974	0.612314	4.01713	5.89122e-05	0.000543561	100514773	ACOT7	acyl-CoA thioesterase 7 [Source:VGNC Symbol;Acc:VGNC:96893]
CvsSt	ENSSSCG00000003382	63.0416	2.11188	0.496363	4.25471	2.09319e-05	0.000232393	100626842	TAS1R1	taste 1 receptor member 1 [Source:VGNC Symbol;Acc:VGNC:93740]
CvsSt	ENSSSCG00000003455	64.767	2.82183	0.679682	4.15169	3.30028e-05	0.000339414	100627409	FHAD1	forkhead associated phosphopeptide binding domain 1 [Source:VGNC Symbol;Acc:VGNC:88125]
CvsSt	ENSSSCG00000003471	930.869	2.23694	0.434557	5.14763	2.63793e-07	6.03279e-06	100522873	EPHA2	EPH receptor A2 [Source:VGNC Symbol;Acc:VGNC:87731]
CvsSt	ENSSSCG00000003481	2384.29	7.81648	0.849905	9.19688	3.68485e-20	8.53133e-18	100524567	PADI1	peptidyl arginine deiminase 1 [Source:VGNC Symbol;Acc:VGNC:91145]
CvsSt	ENSSSCG00000003482	1120.03	9.13929	1.02654	8.90304	5.43372e-19	1.04201e-16	100524379	PADI3	peptidyl arginine deiminase 3 [Source:VGNC Symbol;Acc:VGNC:91147]
CvsSt	ENSSSCG00000003483	164.754	2.20126	0.600949	3.66298	0.000249301	0.0017637	100524749	PADI4	peptidyl arginine deiminase 4 [Source:VGNC Symbol;Acc:VGNC:98175]
CvsSt	ENSSSCG00000003508	87.5536	6.19735	0.972232	6.37435	1.83745e-10	1.00241e-08
CvsSt	ENSSSCG00000003509	100.755	2.99658	0.383498	7.81381	5.54863e-15	7.63338e-13	100515781	SH2D5	SH2 domain containing 5 [Source:VGNC Symbol;Acc:VGNC:92812]
CvsSt	ENSSSCG00000003514	184.228	2.33151	0.641194	3.6362	0.000276687	0.00191851	100517288	HSPG2	heparan sulfate proteoglycan 2 [Source:VGNC Symbol;Acc:VGNC:97099]
CvsSt	ENSSSCG00000003527	28.2072	7.61744	1.75074	4.35098	1.35533e-05	0.000160618	100519549	EPHB2	EPH receptor B2 [Source:VGNC Symbol;Acc:VGNC:87737]
CvsSt	ENSSSCG00000003541	17.021	3.97733	1.2555	3.16793	0.00153528	0.00755307	100736928	STPG1	sperm tail PG-rich repeat containing 1 [Source:VGNC Symbol;Acc:VGNC:93570]
CvsSt	ENSSSCG00000003543	5516.17	3.28237	0.517186	6.34659	2.20141e-10	1.16454e-08	100521095	NIPAL3	NIPA like domain containing 3 [Source:VGNC Symbol;Acc:VGNC:90750]
CvsSt	ENSSSCG00000003561	25615.9	2.31117	0.50866	4.54364	5.5291e-06	7.67325e-05	100513544	ZDHHC18	zinc finger DHHC-type palmitoyltransferase 18 [Source:VGNC Symbol;Acc:VGNC:95120]
CvsSt	ENSSSCG00000003570	3443.34	2.01924	0.548666	3.68027	0.000232992	0.00167164	100190994	WDTC1	WD and tetratricopeptide repeats 1 [Source:VGNC Symbol;Acc:VGNC:94952]
CvsSt	ENSSSCG00000003573	401.566	2.04603	0.374312	5.46612	4.59989e-08	1.30928e-06	100512235	MAP3K6	mitogen-activated protein kinase kinase kinase 6 [Source:VGNC Symbol;Acc:VGNC:89986]
CvsSt	ENSSSCG00000003603	234.757	2.52701	0.724815	3.48642	0.000489531	0.00303618	100737666	COL16A1	collagen type XVI alpha 1 chain [Source:VGNC Symbol;Acc:VGNC:86867]
CvsSt	ENSSSCG00000003644	600.158	3.18822	0.628081	5.07612	3.85218e-07	8.29179e-06	396986	FHL3	four and a half LIM domains 3 [Source:VGNC Symbol;Acc:VGNC:88129]
CvsSt	ENSSSCG00000003684	639.018	4.00169	0.555614	7.20228	5.92133e-13	5.6776e-11	100520570	MTCL1	microtubule crosslinking factor 1 [Source:VGNC Symbol;Acc:VGNC:90438]
CvsSt	ENSSSCG00000003687	489.837	4.91697	0.799305	6.15156	7.67263e-10	3.5878e-08	100520913	EPB41L3	erythrocyte membrane protein band 4.1 like 3 [Source:VGNC Symbol;Acc:VGNC:87724]
CvsSt	ENSSSCG00000003707	2469.77	2.18661	0.540622	4.04462	5.24075e-05	0.000494423	397591	NPC1	NPC intracellular cholesterol transporter 1 [Source:VGNC Symbol;Acc:VGNC:98521]
CvsSt	ENSSSCG00000003711	96.7348	2.30018	0.488334	4.71026	2.47407e-06	3.95372e-05	100511266	CABYR	calcium binding tyrosine phosphorylation regulated [Source:VGNC Symbol;Acc:VGNC:86114]
CvsSt	ENSSSCG00000003712	2200.21	2.13131	0.49692	4.28905	1.79442e-05	0.000205224	100511459	OSBPL1A	oxysterol binding protein like 1A [Source:VGNC Symbol;Acc:VGNC:91070]
CvsSt	ENSSSCG00000003753	258.023	2.25688	0.802677	2.81169	0.00492813	0.0186636	414756	ENSSSCG00000003753	PDZK1 interacting protein 1 [Source:NCBI gene (formerly Entrezgene);Acc:414756]
CvsSt	ENSSSCG00000003762	5.32701	4.75239	1.87692	2.53202	0.0113409	0.0357237	100525348	ADGRL4	adhesion G protein-coupled receptor L4 [Source:VGNC Symbol;Acc:VGNC:85138]
CvsSt	ENSSSCG00000003768	73.4444	2.49876	0.717819	3.48105	0.000499461	0.00308753	100510913	NEXN	nexilin F-actin binding protein [Source:VGNC Symbol;Acc:VGNC:98154]
CvsSt	ENSSSCG00000003789	4470.16	8.69569	0.795603	10.9297	8.31313e-28	3.58693e-25	733654	CTH	cystathionine gamma-lyase [Source:VGNC Symbol;Acc:VGNC:96961]
CvsSt	ENSSSCG00000003795	1885.88	2.72381	0.566605	4.80724	1.53031e-06	2.63878e-05	100516916	WLS	Wnt ligand secretion mediator [Source:VGNC Symbol;Acc:VGNC:94961]
CvsSt	ENSSSCG00000003797	57.8926	4.13225	0.849676	4.86333	1.15428e-06	2.09903e-05	733668	DIRAS3	DIRAS family GTPase 3 [Source:VGNC Symbol;Acc:VGNC:87314]
CvsSt	ENSSSCG00000003799	168.82	3.20878	0.762262	4.20955	2.55879e-05	0.000274611	397178	IL12RB2	interleukin 12 receptor subunit beta 2 [Source:VGNC Symbol;Acc:VGNC:98476]
CvsSt	ENSSSCG00000003803	20.4854	4.34305	1.36042	3.19243	0.00141082	0.00704853	100519721	ENSSSCG00000003803	chromosome 6 C1orf141 homolog [Source:VGNC Symbol;Acc:VGNC:96931]
CvsSt	ENSSSCG00000003807	2482.24	6.76628	0.708637	9.54829	1.31854e-21	3.62788e-19	406190	DNAJC6	DnaJ heat shock protein family (Hsp40) member C6 [Source:VGNC Symbol;Acc:VGNC:96625]
CvsSt	ENSSSCG00000003811	34.3862	2.38867	0.718549	3.3243	0.000886411	0.00485671	100520620	ROR1	receptor tyrosine kinase like orphan receptor 1 [Source:VGNC Symbol;Acc:VGNC:98295]
CvsSt	ENSSSCG00000003821	13.4013	3.61828	1.38341	2.61548	0.00891012	0.0296146	100523255	KANK4	KN motif and ankyrin repeat domains 4 [Source:VGNC Symbol;Acc:VGNC:89298]
CvsSt	ENSSSCG00000003834	8.91327	6.10232	2.02072	3.01988	0.00252874	0.0111465	100037954	C8B	complement C8 beta chain [Source:VGNC Symbol;Acc:VGNC:86077]
CvsSt	ENSSSCG00000003876	45.9704	2.17069	0.482204	4.50159	6.74456e-06	8.98564e-05	100515210	CDKN2C	cyclin dependent kinase inhibitor 2C [Source:VGNC Symbol;Acc:VGNC:96942]
CvsSt	ENSSSCG00000003882	124.158	2.93392	0.834216	3.51698	0.000436488	0.00276963	100522082	SLC5A9	solute carrier family 5 member 9 [Source:VGNC Symbol;Acc:VGNC:93149]
CvsSt	ENSSSCG00000003897	365.366	2.53906	0.447748	5.67073	1.42193e-08	4.77793e-07	100738460	MOB3C	MOB kinase activator 3C [Source:VGNC Symbol;Acc:VGNC:90293]
CvsSt	ENSSSCG00000003898	1815.2	3.05822	0.638971	4.78616	1.70003e-06	2.88428e-05	100233194	MKNK1	MAPK interacting serine/threonine kinase 1 [Source:VGNC Symbol;Acc:VGNC:90246]
CvsSt	ENSSSCG00000003901	118.399	2.73	0.74357	3.67147	0.000241155	0.00171345	396949	FAAH	fatty acid amide hydrolase [Source:VGNC Symbol;Acc:VGNC:97056]
CvsSt	ENSSSCG00000003921	15.7947	5.04148	1.58493	3.18089	0.00146822	0.00729116	100514968	ZSWIM5	zinc finger SWIM-type containing 5 [Source:VGNC Symbol;Acc:VGNC:95334]
CvsSt	ENSSSCG00000003928	4763.02	5.208	0.813601	6.40117	1.54188e-10	8.68621e-09	397250	PLK3	polo like kinase 3 [Source:VGNC Symbol;Acc:VGNC:91564]
CvsSt	ENSSSCG00000003929	14.056	2.73619	0.822954	3.32485	0.000884675	0.0048486	100516679	BEST4	bestrophin 4 [Source:VGNC Symbol;Acc:VGNC:85806]
CvsSt	ENSSSCG00000003931	112.749	2.27306	0.425559	5.34134	9.22603e-08	2.41929e-06	100516205	KIF2C	kinesin family member 2C [Source:VGNC Symbol;Acc:VGNC:89469]
CvsSt	ENSSSCG00000003971	205.749	2.16442	0.642067	3.37102	0.000748901	0.00426195	100525880	SCMH1	Scm polycomb group protein homolog 1 [Source:VGNC Symbol;Acc:VGNC:92627]
CvsSt	ENSSSCG00000003973	1022.62	3.76868	0.46438	8.11551	4.83732e-16	7.5898e-14	100525292	CTPS1	CTP synthase 1 [Source:VGNC Symbol;Acc:VGNC:87070]
CvsSt	ENSSSCG00000003975	3.8413	4.99246	1.57733	3.16514	0.0015501	0.00761413	100526228	KCNQ4	potassium voltage-gated channel subfamily Q member 4 [Source:VGNC Symbol;Acc:VGNC:89383]
CvsSt	ENSSSCG00000004017	285.264	6.75205	1.15052	5.8687	4.39228e-09	1.6846e-07	100514201	ENSSSCG00000004017	FERM domain containing 1 [Source:VGNC Symbol;Acc:VGNC:88236]
CvsSt	ENSSSCG00000004024	660.818	2.40998	0.478517	5.03635	4.74495e-07	9.91011e-06	100157985	ENSSSCG00000004024
CvsSt	ENSSSCG00000004233	14856	4.0203	0.615175	6.53521	6.35223e-11	3.93276e-09	100153442	SMPDL3A	sphingomyelin phosphodiesterase acid like 3A [Source:VGNC Symbol;Acc:VGNC:93265]
CvsSt	ENSSSCG00000004234	756.109	8.28547	1.20574	6.87169	6.34453e-12	4.99796e-10	574075	FABP7	fatty acid binding protein 7 [Source:VGNC Symbol;Acc:VGNC:87873]
CvsSt	ENSSSCG00000004241	156066	2.21259	0.352731	6.27274	3.54738e-10	1.82019e-08	100518636	GJA1	gap junction protein alpha 1 [Source:VGNC Symbol;Acc:VGNC:103098]
CvsSt	ENSSSCG00000004291	1198.5	8.35946	0.878256	9.51824	1.76131e-21	4.64464e-19	100157995	NT5E	5'-nucleotidase ecto [Source:VGNC Symbol;Acc:VGNC:90925]
CvsSt	ENSSSCG00000004366	14.3017	4.07997	1.20451	3.38726	0.000705952	0.0040816	100153106	BVES	blood vessel epicardial substance [Source:VGNC Symbol;Acc:VGNC:103040]
CvsSt	ENSSSCG00000004369	6316.19	2.94139	0.615061	4.78228	1.73319e-06	2.93528e-05	100154284	PRDM1	PR/SET domain 1 [Source:VGNC Symbol;Acc:VGNC:91772]
CvsSt	ENSSSCG00000004371	23592.8	2.93581	0.483193	6.07585	1.23333e-09	5.44531e-08	100521168	CRYBG1	crystallin beta-gamma domain containing 1 [Source:VGNC Symbol;Acc:VGNC:87018]
CvsSt	ENSSSCG00000004373	4293	2.06396	0.420309	4.91057	9.08113e-07	1.71207e-05	100519752	RTN4IP1	reticulon 4 interacting protein 1 [Source:VGNC Symbol;Acc:VGNC:92503]
CvsSt	ENSSSCG00000004415	59.8037	3.41787	0.857631	3.98525	6.74105e-05	0.000606535	100514885	ENSSSCG00000004415
CvsSt	ENSSSCG00000004421	8150.3	2.65931	0.718277	3.70235	0.000213612	0.00155858	791125	FYN	FYN proto-onco, Src family tyrosine kinase [Source:VGNC Symbol;Acc:VGNC:88276]
CvsSt	ENSSSCG00000004445	16640.5	10.1662	0.767817	13.2404	5.1251e-40	5.40555e-37	100154559	CALHM4	calcium homeostasis modulator family member 4 [Source:VGNC Symbol;Acc:VGNC:86145]
CvsSt	ENSSSCG00000004454	655.576	2.11696	0.496137	4.26689	1.98216e-05	0.000222276	397538	ME1	malic enzyme 1 [Source:VGNC Symbol;Acc:VGNC:90095]
CvsSt	ENSSSCG00000004466	187.99	2.31434	0.442438	5.23088	1.68709e-07	4.08017e-06	100157649	TTK	TTK protein kinase [Source:VGNC Symbol;Acc:VGNC:94565]
CvsSt	ENSSSCG00000004503	5.9845	5.06588	1.65894	3.05368	0.00226051	0.0101744	100519879	LOXHD1	lipoxygenase homology domains 1 [Source:VGNC Symbol;Acc:VGNC:89779]
CvsSt	ENSSSCG00000004506	689.801	2.02236	0.581076	3.48036	0.000500735	0.00309254	100152137	CTIF	cap binding complex dependent translation initiation factor [Source:VGNC Symbol;Acc:VGNC:87062]
CvsSt	ENSSSCG00000004507	1728.6	2.04759	0.581764	3.51962	0.00043216	0.00274879	100521305	SMAD7	SMAD family member 7 [Source:VGNC Symbol;Acc:VGNC:93221]
CvsSt	ENSSSCG00000004518	14.8523	2.22818	0.732279	3.0428	0.0023439	0.0104753	100157355	SKA1	spindle and kinetochore associated complex subunit 1 [Source:VGNC Symbol;Acc:VGNC:103176]
CvsSt	ENSSSCG00000004534	37.2307	4.40086	0.849247	5.18207	2.19436e-07	5.1432e-06	100152360	CCDC68	coiled-coil domain containing 68 [Source:VGNC Symbol;Acc:VGNC:86308]
CvsSt	ENSSSCG00000004576	2332.7	2.88201	0.63097	4.56759	4.93362e-06	6.9743e-05	100156637	RORA	RAR related orphan receptor A [Source:VGNC Symbol;Acc:VGNC:92408]
CvsSt	ENSSSCG00000004615	88.6426	9.39874	1.65867	5.66643	1.45801e-08	4.86473e-07	100153251	WDR72	WD repeat domain 72 [Source:VGNC Symbol;Acc:VGNC:94938]
CvsSt	ENSSSCG00000004658	18.9998	2.08631	0.734899	2.83891	0.00452674	0.0174853	414836	FBN1	fibrillin 1 [Source:VGNC Symbol;Acc:VGNC:103090]
CvsSt	ENSSSCG00000004662	109.184	2.62219	1.0568	2.48125	0.0130922	0.0398775	100511672	SLC24A5	solute carrier family 24 member 5 [Source:VGNC Symbol;Acc:VGNC:92989]
CvsSt	ENSSSCG00000004663	40.3991	2.03991	0.521047	3.91503	9.03944e-05	0.000773383	100511850	SEMA6D	semaphorin 6D [Source:VGNC Symbol;Acc:VGNC:92711]
CvsSt	ENSSSCG00000004666	2173.41	2.63096	0.34737	7.57394	3.62072e-14	4.35059e-12	100154990	ENSSSCG00000004666	sulfide quinone oxidoreductase [Source:VGNC Symbol;Acc:VGNC:101496]
CvsSt	ENSSSCG00000004705	101.376	5.92071	1.29701	4.56489	4.99761e-06	7.04377e-05	100520470	MAP1A	microtubule associated protein 1A [Source:VGNC Symbol;Acc:VGNC:89978]
CvsSt	ENSSSCG00000004710	815.534	4.22837	0.440069	9.60842	7.36718e-22	2.08048e-19	100155388	ADAL	adenosine deaminase like [Source:VGNC Symbol;Acc:VGNC:85060]
CvsSt	ENSSSCG00000004712	2410.76	8.62344	0.721931	11.945	6.89817e-33	3.85181e-30	100152931	TGM7	transglutaminase 7 [Source:VGNC Symbol;Acc:VGNC:93938]
CvsSt	ENSSSCG00000004736	85.0038	2.99564	0.629201	4.76103	1.92608e-06	3.19639e-05	100155358	SPTBN5	spectrin beta, non-erythrocytic 5 [Source:VGNC Symbol;Acc:VGNC:103183]
CvsSt	ENSSSCG00000004737	2465.41	3.17801	0.613174	5.18288	2.18489e-07	5.13104e-06	100533119	PLA2G4B	jumonji domain containing 7 [Source:NCBI gene (formerly Entrezgene);Acc:100533119]
CvsSt	ENSSSCG00000004738	1419.49	4.52501	0.792507	5.70974	1.13148e-08	3.88447e-07	100158174	MAPKBP1	mitogen-activated protein kinase binding protein 1 [Source:VGNC Symbol;Acc:VGNC:90014]
CvsSt	ENSSSCG00000004746	33.2452	6.66615	1.59191	4.18751	2.82027e-05	0.00029746	100516235	ENSSSCG00000004746
CvsSt	ENSSSCG00000004761	746.418	2.16607	0.534409	4.0532	5.05218e-05	0.000481674	100154961	ZFYVE19	zinc finger FYVE-type containing 19 [Source:VGNC Symbol;Acc:VGNC:95158]
CvsSt	ENSSSCG00000004843	391.365	11.887	2.04038	5.82588	5.68121e-09	2.12737e-07	100158130	TRPM1	transient receptor potential cation channel subfamily M member 1 [Source:VGNC Symbol;Acc:VGNC:94466]
CvsSt	ENSSSCG00000004956	38.8075	4.93507	1.03594	4.76386	1.89928e-06	3.15744e-05	100152847	SKOR1	SKI family transcriptional corepressor 1 [Source:VGNC Symbol;Acc:VGNC:92905]
CvsSt	ENSSSCG00000004962	99.1722	2.64908	0.557986	4.74757	2.05873e-06	3.38105e-05	100520530	CORO2B	coronin 2B [Source:VGNC Symbol;Acc:VGNC:86916]
CvsSt	ENSSSCG00000004976	34.436	2.26047	0.631015	3.58228	0.000340609	0.00226814	100154470	LRRC49	leucine rich repeat containing 49 [Source:VGNC Symbol;Acc:VGNC:89846]
CvsSt	ENSSSCG00000004980	1113.49	3.36191	0.748161	4.49357	7.00394e-06	9.26619e-05	100524417	THSD4	thrombospondin type 1 domain containing 4 [Source:VGNC Symbol;Acc:VGNC:93967]
CvsSt	ENSSSCG00000005045	4668.56	5.04513	0.765776	6.58826	4.45001e-11	2.85417e-09	100113425	BMP4	bone morphotic protein 4 [Source:VGNC Symbol;Acc:VGNC:85843]
CvsSt	ENSSSCG00000005056	102.307	2.1471	0.455814	4.71046	2.47155e-06	3.95303e-05	100511173	DLGAP5	DLG associated protein 5 [Source:VGNC Symbol;Acc:VGNC:87332]
CvsSt	ENSSSCG00000005136	524.031	2.22498	0.468059	4.75364	1.99789e-06	3.30112e-05	100125969	IFNE	interferon epsilon [Source:VGNC Symbol;Acc:VGNC:89039]
CvsSt	ENSSSCG00000005193	2277.55	11.0045	2.05407	5.35739	8.44329e-08	2.23565e-06	574065	TYRP1	tyrosinase related protein 1 [Source:VGNC Symbol;Acc:VGNC:94620]
CvsSt	ENSSSCG00000005206	153.861	10.546	1.86199	5.66384	1.48026e-08	4.92406e-07	100520532	MLANA	melan-A [Source:VGNC Symbol;Acc:VGNC:90250]
CvsSt	ENSSSCG00000005268	32.1231	3.19532	0.781302	4.08974	4.31853e-05	0.000424585	100739111	RORB	RAR related orphan receptor B [Source:VGNC Symbol;Acc:VGNC:92409]
CvsSt	ENSSSCG00000005269	181.456	4.98021	0.817188	6.09432	1.09902e-09	4.96215e-08	100157775	TRPM6	transient receptor potential cation channel subfamily M member 6 [Source:VGNC Symbol;Acc:VGNC:94469]
CvsSt	ENSSSCG00000005277	49.6225	4.32194	0.740394	5.83735	5.30373e-09	2.00981e-07	106508649	GCNT1	glucosaminyl (N-acetyl) transferase 1 [Source:VGNC Symbol;Acc:VGNC:103096]
CvsSt	ENSSSCG00000005288	2445.78	2.31376	0.496804	4.65728	3.20415e-06	4.88209e-05	100156044	TLE4	TLE family member 4, transcriptional corepressor [Source:VGNC Symbol;Acc:VGNC:98372]
CvsSt	ENSSSCG00000005308	892.392	2.01001	0.512403	3.92271	8.75595e-05	0.00075252	100158062	RUSC2	RUN and SH3 domain containing 2 [Source:VGNC Symbol;Acc:VGNC:92520]
CvsSt	ENSSSCG00000005344	28.7546	2.15039	0.635675	3.38284	0.000717407	0.00413227	100519998	MELK	maternal embryonic leucine zipper kinase [Source:VGNC Symbol;Acc:VGNC:90137]
CvsSt	ENSSSCG00000005369	5.19043	5.43789	1.55694	3.49267	0.000478223	0.00298163	100157892	FOXE1	forkhead box E1 [Source:VGNC Symbol;Acc:VGNC:88202]
CvsSt	ENSSSCG00000005375	273.915	3.29186	0.657692	5.00517	5.58122e-07	1.1369e-05	100511910	CORO2A	coronin 2A [Source:VGNC Symbol;Acc:VGNC:86915]
CvsSt	ENSSSCG00000005380	105.865	5.53477	0.704941	7.85139	4.11435e-15	5.786e-13	100620394	COL15A1	collagen type XV alpha 1 chain [Source:VGNC Symbol;Acc:VGNC:86866]
CvsSt	ENSSSCG00000005465	32.0014	3.3335	0.668768	4.98453	6.21122e-07	1.24651e-05	100516174	SUSD1	sushi domain containing 1 [Source:VGNC Symbol;Acc:VGNC:93633]
CvsSt	ENSSSCG00000005487	142.528	3.57473	0.757919	4.71651	2.39925e-06	3.85492e-05	102159686	COL27A1	collagen type XXVII alpha 1 chain [Source:VGNC Symbol;Acc:VGNC:86872]
CvsSt	ENSSSCG00000005490	18.0111	3.53236	0.827063	4.27097	1.94622e-05	0.000219412	100520475	WHRN	whirlin [Source:VGNC Symbol;Acc:VGNC:94956]
CvsSt	ENSSSCG00000005498	99.8253	2.93391	0.705903	4.15625	3.23508e-05	0.000333974	397219	PAPPA	pappalysin 1 [Source:VGNC Symbol;Acc:VGNC:91170]
CvsSt	ENSSSCG00000005502	197.242	6.86778	1.05718	6.4963	8.23197e-11	4.97719e-09	100523883	ASTN2	astrotactin 2 [Source:VGNC Symbol;Acc:VGNC:85594]
CvsSt	ENSSSCG00000005503	2387.74	4.39865	0.639456	6.87874	6.03825e-12	4.79649e-10	399541	TLR4	toll like receptor 4 [Source:VGNC Symbol;Acc:VGNC:94025]
CvsSt	ENSSSCG00000005530	52.832	4.46733	0.861234	5.18713	2.13561e-07	5.04914e-06	100739090	LHX6	LIM homeobox 6 [Source:VGNC Symbol;Acc:VGNC:89716]
CvsSt	ENSSSCG00000005613	225.716	2.17794	0.546265	3.98697	6.69231e-05	0.000603007	100156738	LRSAM1	leucine rich repeat and sterile alpha motif containing 1 [Source:VGNC Symbol;Acc:VGNC:89864]
CvsSt	ENSSSCG00000005620	141.972	5.79849	0.791126	7.32941	2.31162e-13	2.34938e-11	100151897	SH2D3C	SH2 domain containing 3C [Source:VGNC Symbol;Acc:VGNC:92810]
CvsSt	ENSSSCG00000005663	174.604	2.16729	0.448151	4.83606	1.32436e-06	2.34762e-05	100515071	ENSSSCG00000005663	kynurenine aminotransferase 1 [Source:VGNC Symbol;Acc:VGNC:103115]
CvsSt	ENSSSCG00000005671	1237.53	3.13057	0.50822	6.15986	7.28079e-10	3.42992e-08	100127351	CRAT	carnitine O-acetyltransferase [Source:VGNC Symbol;Acc:VGNC:86976]
CvsSt	ENSSSCG00000005688	97.2561	2.01527	0.605044	3.33078	0.000866038	0.00476987	654407	PTGES	prostaglandin E synthase [Source:VGNC Symbol;Acc:VGNC:91950]
CvsSt	ENSSSCG00000005701	2376.71	8.63453	0.840642	10.2714	9.48626e-25	3.21601e-22	414411	ASS1	argininosuccinate synthase 1 [Source:VGNC Symbol;Acc:VGNC:85590]
CvsSt	ENSSSCG00000005710	79.7241	8.01047	1.5287	5.24005	1.60529e-07	3.90224e-06	100157958	LAMC3	laminin subunit gamma 3 [Source:VGNC Symbol;Acc:VGNC:89626]
CvsSt	ENSSSCG00000005742	3.87041	4.83823	1.7121	2.8259	0.00471473	0.0180316	733609	DBH	dopamine beta-hydroxylase [Source:VGNC Symbol;Acc:VGNC:87163]
CvsSt	ENSSSCG00000005780	4.02131	5.13326	1.75526	2.9245	0.00345013	0.0141961	100523354	KCNG2	potassium voltage-gated channel modifier subfamily G member 2 [Source:VGNC Symbol;Acc:VGNC:89340]
CvsSt	ENSSSCG00000005781	467.134	4.92119	0.9949	4.94641	7.55936e-07	1.46469e-05	100523715	TARS3	threonyl-tRNA synthetase 3 [Source:VGNC Symbol;Acc:VGNC:93739]
CvsSt	ENSSSCG00000005828	69.1686	4.97174	0.948915	5.23939	1.61107e-07	3.91126e-06	100511434	EGFL7	EGF like domain multiple 7 [Source:VGNC Symbol;Acc:VGNC:87584]
CvsSt	ENSSSCG00000005894	228.178	2.03802	0.492378	4.13915	3.48599e-05	0.00035486	100513276	ARHGAP39	Rho GTPase activating protein 39 [Source:VGNC Symbol;Acc:VGNC:85475]
CvsSt	ENSSSCG00000005902	8.79573	2.50492	0.907621	2.75987	0.00578239	0.0211154	100154027	FOXH1	forkhead box H1 [Source:VGNC Symbol;Acc:VGNC:88207]
CvsSt	ENSSSCG00000005941	35.5062	3.89339	1.12423	3.46315	0.000533886	0.00325283	100155706	KHDRBS3	KH RNA binding domain containing, signal transduction associated 3 [Source:VGNC Symbol;Acc:VGNC:89424]
CvsSt	ENSSSCG00000005943	62.8074	2.33685	0.880552	2.65384	0.00795805	0.0271391	445537	ST3GAL1	ST3 beta-galactoside alpha-2,3-sialyltransferase 1 [Source:VGNC Symbol;Acc:VGNC:98863]
CvsSt	ENSSSCG00000006023	1580.74	4.67302	0.714727	6.53819	6.22685e-11	3.87786e-09	100157483	SYBU	syntabulin [Source:VGNC Symbol;Acc:VGNC:93649]
CvsSt	ENSSSCG00000006051	4.75488	3.68486	1.51758	2.42811	0.0151777	0.0447437	100152510	CTHRC1	collagen triple helix repeat containing 1 [Source:VGNC Symbol;Acc:VGNC:87061]
CvsSt	ENSSSCG00000006053	39.6356	2.4572	0.641166	3.83239	0.000126903	0.00102173	100170128	BAALC	BAALC binder of MAP3K1 and KLF4 [Source:VGNC Symbol;Acc:VGNC:98736]
CvsSt	ENSSSCG00000006059	11.612	4.96552	1.58211	3.13854	0.00169789	0.0081855	100156785	NCALD	neurocalcin delta [Source:VGNC Symbol;Acc:VGNC:90594]
CvsSt	ENSSSCG00000006063	80087.8	2.95129	0.72969	4.04459	5.24158e-05	0.000494423	100153958	PABPC1	poly(A) binding protein cytoplasmic 1 [Source:VGNC Symbol;Acc:VGNC:98829]
CvsSt	ENSSSCG00000006140	6179.85	4.32663	0.365298	11.8441	2.30858e-32	1.25224e-29	100154873	CA2	carbonic anhydrase 2 [Source:VGNC Symbol;Acc:VGNC:98746]
CvsSt	ENSSSCG00000006153	23341.4	2.28934	0.367509	6.22935	4.68389e-10	2.32115e-08	574074	FABP5	fatty acid binding protein 5 [Source:VGNC Symbol;Acc:VGNC:98794]
CvsSt	ENSSSCG00000006164	69.4921	2.27356	0.356082	6.38495	1.71457e-10	9.49014e-09	100513655	WNT8B	Wnt family member 8B [Source:VGNC Symbol;Acc:VGNC:94977]
CvsSt	ENSSSCG00000006183	56.7008	2.3147	0.847972	2.72968	0.00633951	0.022653	100517890	SBSPON	somatomedin B and thrombospondin type 1 domain containing [Source:VGNC Symbol;Acc:VGNC:92599]
CvsSt	ENSSSCG00000006196	303.097	7.86418	1.0433	7.53779	4.7799e-14	5.60163e-12	100157250	SLCO5A1	solute carrier organic anion transporter family member 5A1 [Source:HGNC Symbol;Acc:HGNC:19046]
CvsSt	ENSSSCG00000006197	66.5043	3.40158	0.79897	4.25746	2.06763e-05	0.000229885	100152427	SULF1	sulfatase 1 [Source:VGNC Symbol;Acc:VGNC:93612]
CvsSt	ENSSSCG00000006236	5112.15	2.47701	0.630122	3.93101	8.45906e-05	0.000731642	100153039	NSMAF	neutral sphingomyelinase activation associated factor [Source:VGNC Symbol;Acc:VGNC:90909]
CvsSt	ENSSSCG00000006289	44.8785	3.80349	1.2086	3.14703	0.0016494	0.00799639	397217	F5	coagulation factor V [Source:VGNC Symbol;Acc:VGNC:87865]
CvsSt	ENSSSCG00000006302	55.1414	2.10977	0.748021	2.82047	0.00479529	0.0182808	100155594	GPR161	G protein-coupled receptor 161 [Source:VGNC Symbol;Acc:VGNC:88613]
CvsSt	ENSSSCG00000006307	202.278	2.50612	0.694527	3.60838	0.000308115	0.00209512	100152372	RCSD1	RCSD domain containing 1 [Source:VGNC Symbol;Acc:VGNC:92186]
CvsSt	ENSSSCG00000006329	5.85447	4.92048	1.81989	2.70372	0.0068567	0.0241019	100513081	LMX1A	LIM homeobox transcription factor 1 alpha [Source:VGNC Symbol;Acc:VGNC:89770]
CvsSt	ENSSSCG00000006345	11.7204	2.3963	0.846214	2.83179	0.00462883	0.0177891	100156452	OLFML2B	olfactomedin like 2B [Source:VGNC Symbol;Acc:VGNC:91034]
CvsSt	ENSSSCG00000006376	5.59039	5.6574	2.21628	2.55266	0.0106905	0.0341051	100156074	ENSSSCG00000006376
CvsSt	ENSSSCG00000006390	12.1049	2.97955	1.02067	2.91921	0.0035092	0.0143737	100156448	CASQ1	calsequestrin 1 [Source:VGNC Symbol;Acc:VGNC:86205]
CvsSt	ENSSSCG00000006394	145.644	5.7606	0.961241	5.99287	2.06167e-09	8.64035e-08	100515727	CFAP45	cilia and flagella associated protein 45 [Source:VGNC Symbol;Acc:VGNC:86600]
CvsSt	ENSSSCG00000006396	94.6005	2.80645	0.584467	4.80173	1.57299e-06	2.69523e-05	102160717	IGSF9	immunoglobulin superfamily member 9 [Source:VGNC Symbol;Acc:VGNC:98811]
CvsSt	ENSSSCG00000006399	24958.2	8.87036	0.888956	9.9784	1.89492e-23	5.99585e-21	100514765	VSIG8	V-set and immunoglobulin domain containing 8 [Source:VGNC Symbol;Acc:VGNC:98894]
CvsSt	ENSSSCG00000006474	8.14473	3.44691	1.14023	3.02299	0.00250293	0.0110533	100153933	NES	nestin [Source:VGNC Symbol;Acc:VGNC:90689]
CvsSt	ENSSSCG00000006495	1252.71	2.44586	0.562069	4.35152	1.35196e-05	0.000160346	100157147	SEMA4A	semaphorin 4A [Source:VGNC Symbol;Acc:VGNC:92700]
CvsSt	ENSSSCG00000006518	51.1087	2.05632	0.384363	5.34993	8.79862e-08	2.31681e-06	100526049	HCN3	hyperpolarization activated cyclic nucleotide gated potassium channel 3 [Source:VGNC Symbol;Acc:VGNC:88804]
CvsSt	ENSSSCG00000006579	5460.42	7.6034	0.768333	9.89598	4.33345e-23	1.3487e-20	100157925	S100A3	S100 calcium binding protein A3 [Source:VGNC Symbol;Acc:VGNC:92542]
CvsSt	ENSSSCG00000006594	25.4957	3.74421	1.36869	2.73561	0.0062264	0.0223481	494012	SMCP	sperm mitochondria associated cysteine rich protein [Source:VGNC Symbol;Acc:VGNC:93246]
CvsSt	ENSSSCG00000006595	20168.7	3.48715	0.569243	6.12595	9.01421e-10	4.17402e-08	407242	IVL	involucrin [Source:NCBI gene (formerly Entrezgene);Acc:407242]
CvsSt	ENSSSCG00000006604	338.668	8.93177	1.3813	6.46619	1.00502e-10	5.93087e-09	100154709	CRNN	cornulin [Source:VGNC Symbol;Acc:VGNC:87001]
CvsSt	ENSSSCG00000006605	1015.21	10.482	1.69876	6.17036	6.81338e-10	3.21771e-08	100155533	ENSSSCG00000006605	repetin [Source:VGNC Symbol;Acc:VGNC:98851]
CvsSt	ENSSSCG00000006609	4849.04	10.3233	1.16753	8.842	9.40167e-19	1.74991e-16	100154311	TCHHL1	trichohyalin like 1 [Source:VGNC Symbol;Acc:VGNC:93826]
CvsSt	ENSSSCG00000006624	2225.97	8.27615	0.715669	11.5642	6.2564e-31	3.12573e-28	100152724	SELENBP1	selenium binding protein 1 [Source:VGNC Symbol;Acc:VGNC:92689]
CvsSt	ENSSSCG00000006698	2068.1	2.8137	0.767231	3.66734	0.000245089	0.00173879	100155378	BCL9	BCL9 transcription coactivator [Source:VGNC Symbol;Acc:VGNC:96567]
CvsSt	ENSSSCG00000006758	5.51303	5.56906	1.55126	3.59002	0.000330651	0.00221817	100152816	SYT6	synaptotagmin 6 [Source:VGNC Symbol;Acc:VGNC:93687]
CvsSt	ENSSSCG00000006761	185.799	2.43844	0.453986	5.37117	7.8227e-08	2.0947e-06	100516672	DCLRE1B	DNA cross-link repair 1B [Source:VGNC Symbol;Acc:VGNC:87186]
CvsSt	ENSSSCG00000006767	5562.6	2.95198	0.627665	4.70311	2.5623e-06	4.05715e-05	100153223	MAGI3	membrane associated guanylate kinase, WW and PDZ domain containing 3 [Source:VGNC Symbol;Acc:VGNC:89956]
CvsSt	ENSSSCG00000006811	16.1523	3.19185	1.04863	3.04382	0.00233597	0.0104472	100156430	SLC6A17	solute carrier family 6 member 17 [Source:VGNC Symbol;Acc:VGNC:93158]
CvsSt	ENSSSCG00000006842	9.95701	6.28527	1.70697	3.68212	0.000231302	0.00166553
CvsSt	ENSSSCG00000006987	91.2271	3.48861	0.861865	4.04774	5.17136e-05	0.000489179	100037298	SLC7A2	solute carrier family 7 member 2 [Source:VGNC Symbol;Acc:VGNC:95506]
CvsSt	ENSSSCG00000007001	48.405	8.5115	1.67858	5.07065	3.9645e-07	8.49503e-06
CvsSt	ENSSSCG00000007022	8.22606	4.70277	1.60459	2.93082	0.00338064	0.013975	100157679	ANK1	ankyrin 1 [Source:VGNC Symbol;Acc:VGNC:96344]
CvsSt	ENSSSCG00000007027	18125.5	5.20562	0.816615	6.37463	1.83409e-10	1.00241e-08	100738984	SLC20A2	solute carrier family 20 member 2 [Source:VGNC Symbol;Acc:VGNC:95498]
CvsSt	ENSSSCG00000007033	81.5746	2.86965	0.593977	4.83125	1.3568e-06	2.38789e-05	100525135	AP3M2	adaptor related protein complex 3 subunit mu 2 [Source:VGNC Symbol;Acc:VGNC:96369]
CvsSt	ENSSSCG00000007058	14.7022	4.64465	1.55355	2.98969	0.00279259	0.0120302	100516581	PLCB4	phospholipase C beta 4 [Source:VGNC Symbol;Acc:VGNC:96491]
CvsSt	ENSSSCG00000007063	8.03642	5.42536	1.67657	3.23599	0.00121223	0.00624261	100517504	ANKEF1	ankyrin repeat and EF-hand domain containing 1 [Source:VGNC Symbol;Acc:VGNC:95662]
CvsSt	ENSSSCG00000007073	231.63	2.60162	0.550563	4.72538	2.29691e-06	3.72072e-05	100154170	ISM1	isthmin 1 [Source:VGNC Symbol;Acc:VGNC:95787]
CvsSt	ENSSSCG00000007084	69.3789	3.82277	0.592256	6.45458	1.08517e-10	6.37832e-09	100521759	BFSP1	beaded filament structural protein 1 [Source:VGNC Symbol;Acc:VGNC:95472]
CvsSt	ENSSSCG00000007116	4.48179	4.93108	1.57141	3.138	0.00170107	0.00819305	100155660	CD93	CD93 molecule [Source:HGNC Symbol;Acc:HGNC:15855]
CvsSt	ENSSSCG00000007125	31.7961	6.26702	1.64532	3.809	0.000139528	0.00110189	100516119	ENSSSCG00000007125
CvsSt	ENSSSCG00000007172	135.507	10.1949	1.61813	6.30045	2.96779e-10	1.53944e-08	100739527	TMC2	transmembrane channel like 2 [Source:VGNC Symbol;Acc:VGNC:95812]
CvsSt	ENSSSCG00000007235	194.972	2.06082	0.454375	4.53552	5.74622e-06	7.92819e-05	100525546	TPX2	TPX2 microtubule nucleation factor [Source:VGNC Symbol;Acc:VGNC:95559]
CvsSt	ENSSSCG00000007239	12.5625	3.79132	1.38115	2.74504	0.00605031	0.0218637	100739177	CCM2L	CCM2 like scaffold protein [Source:VGNC Symbol;Acc:VGNC:95757]
CvsSt	ENSSSCG00000007243	1155.99	2.92154	0.601102	4.86031	1.17201e-06	2.12316e-05	100624021	PLAGL2	PLAG1 like zinc finger 2 [Source:VGNC Symbol;Acc:VGNC:96490]
CvsSt	ENSSSCG00000007344	11.1312	6.748	2.17381	3.10423	0.00190776	0.00894294	100516472	KIAA1755	KIAA1755 [Source:VGNC Symbol;Acc:VGNC:96217]
CvsSt	ENSSSCG00000007351	27.0684	2.92794	0.613878	4.76957	1.84616e-06	3.08588e-05	102164658	FAM83D	family with sequence similarity 83 member D [Source:VGNC Symbol;Acc:VGNC:95747]
CvsSt	ENSSSCG00000007358	43.0358	6.20732	1.77294	3.50115	0.000463254	0.00290644	100519117	EMILIN3	elastin microfibril interfacer 3 [Source:VGNC Symbol;Acc:VGNC:95748]
CvsSt	ENSSSCG00000007359	6320.57	4.43424	0.6698	6.62024	3.58611e-11	2.36397e-09	100170771	LPIN3	lipin 3 [Source:VGNC Symbol;Acc:VGNC:95619]
CvsSt	ENSSSCG00000007370	9.32833	2.2458	0.917239	2.44844	0.0143478	0.042802	100155196	R3HDML	R3H domain containing like [Source:VGNC Symbol;Acc:VGNC:98234]
CvsSt	ENSSSCG00000007371	46.222	7.291	1.62236	4.49407	6.98737e-06	9.25717e-05	733636	HNF4A	hepatocyte nuclear factor 4 alpha [Source:VGNC Symbol;Acc:VGNC:96348]
CvsSt	ENSSSCG00000007424	18.7949	2.48352	1.00558	2.46975	0.0135209	0.0408555	414905	TNNC2	troponin C2, fast skeletal type [Source:VGNC Symbol;Acc:VGNC:95547]
CvsSt	ENSSSCG00000007463	10.2498	5.28147	1.70315	3.101	0.00192865	0.00901596	100126284	PTGIS	prostaglandin I2 synthase [Source:VGNC Symbol;Acc:VGNC:96515]
CvsSt	ENSSSCG00000007486	85.051	8.5742	1.71837	4.98973	6.04624e-07	1.21985e-05	397145	CYP24A1	cytochrome P450 family 24 subfamily A member 1 [Source:VGNC Symbol;Acc:VGNC:103371]
CvsSt	ENSSSCG00000007522	207.768	2.69025	0.55429	4.85351	1.21294e-06	2.18497e-05	100141405	CTSZ	cathepsin Z [Source:VGNC Symbol;Acc:VGNC:96084]
CvsSt	ENSSSCG00000007526	8.9361	5.69582	1.74052	3.27248	0.0010661	0.00563787	100144512	ZNF831	zinc finger protein 831 [Source:VGNC Symbol;Acc:VGNC:95765]
CvsSt	ENSSSCG00000007527	164.753	7.27453	1.23616	5.88476	3.98634e-09	1.54368e-07	100049663	ENSSSCG00000007527	endothelin 3 [Source:VGNC Symbol;Acc:VGNC:96260]
CvsSt	ENSSSCG00000007528	42.9958	6.62554	1.70235	3.892	9.9421e-05	0.000841886	100126239	PHACTR3	phosphatase and actin regulator 3 [Source:VGNC Symbol;Acc:VGNC:95667]
CvsSt	ENSSSCG00000007529	917.333	2.2506	0.539183	4.17409	2.99182e-05	0.000312946	100134968	SYCP2	synaptonemal complex protein 2 [Source:VGNC Symbol;Acc:VGNC:95529]
CvsSt	ENSSSCG00000007542	17.4465	3.51121	0.89074	3.9419	8.08383e-05	0.000704968	100522128	PRKAR1B	protein kinase cAMP-dependent type I regulatory subunit beta [Source:VGNC Symbol;Acc:VGNC:91803]
CvsSt	ENSSSCG00000007578	2.52601	4.56586	1.84237	2.47826	0.0132026	0.0401236	100512096	ENSSSCG00000007578
CvsSt	ENSSSCG00000007589	16.0279	2.68908	0.763783	3.52073	0.000430359	0.00273898
CvsSt	ENSSSCG00000007596	3.69848	4.55837	1.64406	2.77264	0.00556043	0.020494	100516001	ENSSSCG00000007596	oncomodulin [Source:VGNC Symbol;Acc:VGNC:99832]
CvsSt	ENSSSCG00000007603	17.7307	6.35819	1.71326	3.71117	0.000206303	0.00151632	100521613	NPTX2	neuronal pentraxin 2 [Source:VGNC Symbol;Acc:VGNC:90863]
CvsSt	ENSSSCG00000007665	10.3672	2.66424	1.01466	2.62576	0.00864552	0.028994	100515824	ENSSSCG00000007665
CvsSt	ENSSSCG00000007667	30.4184	2.3044	0.675019	3.41383	0.000640568	0.00377676	100516002	LRCH4	leucine rich repeats and calponin homology domain containing 4 [Source:VGNC Symbol;Acc:VGNC:89804]
CvsSt	ENSSSCG00000007680	32.6541	8.13013	1.61269	5.04134	4.62287e-07	9.70748e-06	100519360	MYL10	myosin light chain 10 [Source:VGNC Symbol;Acc:VGNC:90513]
CvsSt	ENSSSCG00000007695	10.9529	2.52518	0.995794	2.53585	0.0112176	0.0354118	100511499	ENSSSCG00000007695
CvsSt	ENSSSCG00000007719	70.0561	2.13829	0.464721	4.60124	4.19974e-06	6.12852e-05	100512954	ENSSSCG00000007719
CvsSt	ENSSSCG00000007738	2042.37	7.13395	0.85281	8.36523	5.99956e-17	1.03547e-14	100517757	ENSSSCG00000007738	argininosuccinate lyase [Source:VGNC Symbol;Acc:VGNC:100380]
CvsSt	ENSSSCG00000007765	17.674	5.77536	1.49582	3.86099	0.00011293	0.000933064	100511557	PRSS53	serine protease 53 [Source:VGNC Symbol;Acc:VGNC:91885]
CvsSt	ENSSSCG00000007826	4971.27	3.13208	0.647419	4.83779	1.31289e-06	2.33382e-05	110255326	ENSSSCG00000007826
CvsSt	ENSSSCG00000007836	177.853	3.34318	0.576126	5.80287	6.51909e-09	2.4032e-07	100522244	SCNN1G	sodium channel epithelial 1 subunit gamma [Source:VGNC Symbol;Acc:VGNC:92643]
CvsSt	ENSSSCG00000007838	50.9229	5.74538	1.39321	4.12385	3.72589e-05	0.000375856	100523173	OTOA	otoancorin [Source:VGNC Symbol;Acc:VGNC:91088]
CvsSt	ENSSSCG00000007899	168.641	3.55493	0.60185	5.90668	3.4907e-09	1.37436e-07	102157603	ENSSSCG00000007899
CvsSt	ENSSSCG00000007904	52.788	8.64727	1.71402	5.04502	4.53462e-07	9.56553e-06	100620428	TEKT5	tektin 5 [Source:VGNC Symbol;Acc:VGNC:93870]
CvsSt	ENSSSCG00000007926	97.5363	4.85058	1.58888	3.05283	0.00226692	0.0101953	100524795	SEC14L5	SEC14 like lipid binding 5 [Source:VGNC Symbol;Acc:VGNC:92670]
CvsSt	ENSSSCG00000007933	3.99593	4.75858	1.81905	2.61597	0.00889739	0.0295819	100624981	SEPTIN12	septin 12 [Source:NCBI gene (formerly Entrezgene);Acc:100624981]
CvsSt	ENSSSCG00000007935	67.6233	4.29728	0.88955	4.83085	1.35954e-06	2.38989e-05	100525811	ENSSSCG00000007935	chromosome 3 C16orf71 homolog [Source:VGNC Symbol;Acc:VGNC:86015]
CvsSt	ENSSSCG00000007943	66.0094	2.62025	0.505348	5.18503	2.15978e-07	5.0936e-06	100511924	NMRAL1	NmrA like redox sensor 1 [Source:VGNC Symbol;Acc:VGNC:90799]
CvsSt	ENSSSCG00000007954	30.9035	2.08774	0.457945	4.55892	5.14164e-06	7.21463e-05	100515719	SLX4	SLX4 structure-specific endonuclease subunit [Source:VGNC Symbol;Acc:VGNC:93215]
CvsSt	ENSSSCG00000008001	836.787	3.11854	0.590053	5.28519	1.25577e-07	3.16191e-06	100524016	ENSSSCG00000008001
CvsSt	ENSSSCG00000008012	2353.66	2.16915	0.579871	3.74075	0.000183472	0.00137296	100624780	ENSSSCG00000008012	hydroxyacylglutathione hydrolase [Source:VGNC Symbol;Acc:VGNC:88773]
CvsSt	ENSSSCG00000008013	10.7082	2.12622	0.790814	2.68865	0.00717418	0.0250343	397322	IGFALS	insulin like growth factor binding protein acid labile subunit [Source:NCBI gene (formerly Entrezgene);Acc:397322]
CvsSt	ENSSSCG00000008051	368.745	2.02957	0.421052	4.82023	1.4339e-06	2.51131e-05	100518064	ABCA3	ATP binding cassette subfamily A member 3 [Source:VGNC Symbol;Acc:VGNC:96911]
CvsSt	ENSSSCG00000008073	8.01405	5.61177	1.65523	3.39032	0.000698106	0.00404452	100511925	OMD	osteomodulin [Source:VGNC Symbol;Acc:VGNC:91040]
CvsSt	ENSSSCG00000008103	14.6359	2.67348	0.753337	3.54886	0.00038691	0.00251214	100519652	MERTK	MER proto-onco, tyrosine kinase [Source:VGNC Symbol;Acc:VGNC:90146]
CvsSt	ENSSSCG00000008119	68.6336	4.98526	0.778026	6.40757	1.47858e-10	8.35442e-09	100524248	KCNIP3	potassium voltage-gated channel interacting protein 3 [Source:VGNC Symbol;Acc:VGNC:89350]
CvsSt	ENSSSCG00000008122	98.5531	2.99123	0.710319	4.21111	2.54124e-05	0.000273345	641353	ADRA2B	adrenoceptor alpha 2B [Source:VGNC Symbol;Acc:VGNC:85157]
CvsSt	ENSSSCG00000008126	2.37047	4.27165	1.65268	2.58468	0.00974703	0.0317351	100739686	ASTL	astacin like metalloendopeptidase [Source:VGNC Symbol;Acc:VGNC:85592]
CvsSt	ENSSSCG00000008134	45.4171	2.15583	0.53052	4.06362	4.83165e-05	0.000465982	100526213	EDAR	ectodysplasin A receptor [Source:VGNC Symbol;Acc:VGNC:87541]
CvsSt	ENSSSCG00000008140	24.0814	7.11629	2.0219	3.5196	0.000432191	0.00274879	100512044	SLC5A7	solute carrier family 5 member 7 [Source:VGNC Symbol;Acc:VGNC:93147]
CvsSt	ENSSSCG00000008147	1611.22	2.00705	0.329342	6.09413	1.10038e-09	4.96215e-08	100513532	FHL2	four and a half LIM domains 2 [Source:VGNC Symbol;Acc:VGNC:88128]
CvsSt	ENSSSCG00000008153	474.42	4.35802	0.624196	6.98181	2.91411e-12	2.51474e-10	100101921	SLC9A2	solute carrier family 9 member A2 [Source:VGNC Symbol;Acc:VGNC:93182]
CvsSt	ENSSSCG00000008166	12.2636	5.83875	1.6669	3.50277	0.000460452	0.00289268	100517088	CREG2	cellular repressor of E1A stimulateds 2 [Source:VGNC Symbol;Acc:VGNC:86990]
CvsSt	ENSSSCG00000008196	7.94522	4.45149	1.53918	2.89211	0.00382664	0.0153911
CvsSt	ENSSSCG00000008213	14.9532	4.91762	1.7558	2.80078	0.00509789	0.0191309	396636	CD8B	CD8b molecule [Source:NCBI gene (formerly Entrezgene);Acc:396636]
CvsSt	ENSSSCG00000008227	148.764	2.60132	0.525253	4.9525	7.32649e-07	1.42514e-05	100625751	ST3GAL5	ST3 beta-galactoside alpha-2,3-sialyltransferase 5 [Source:VGNC Symbol;Acc:VGNC:93505]
CvsSt	ENSSSCG00000008230	4.53732	5.09233	1.60557	3.17166	0.00151569	0.00748188	100523367	ATOH8	atonal bHLH transcription factor 8 [Source:VGNC Symbol;Acc:VGNC:85633]
CvsSt	ENSSSCG00000008261	9253.45	2.93394	0.592198	4.95433	7.25797e-07	1.41762e-05	494561	HK2	hexokinase 2 [Source:VGNC Symbol;Acc:VGNC:98034]
CvsSt	ENSSSCG00000008262	133.581	3.6939	0.546493	6.75928	1.38682e-11	1.02447e-09	100512275	SEMA4F	ssemaphorin 4F [Source:VGNC Symbol;Acc:VGNC:92704]
CvsSt	ENSSSCG00000008307	82.7897	3.43419	0.792903	4.33115	1.4833e-05	0.000174045	100621633	SFXN5	sideroflexin 5 [Source:VGNC Symbol;Acc:VGNC:92787]
CvsSt	ENSSSCG00000008308	7.18524	4.46113	1.59558	2.79592	0.00517516	0.0193406	100521187	EMX1	empty spiracles homeobox 1 [Source:VGNC Symbol;Acc:VGNC:87692]
CvsSt	ENSSSCG00000008311	276.105	2.23034	0.794766	2.80629	0.00501159	0.0189043	100521659	CYP26B1	cytochrome P450 family 26 subfamily B member 1 [Source:VGNC Symbol;Acc:VGNC:103374]
CvsSt	ENSSSCG00000008334	2916.91	2.33077	0.245085	9.51003	1.9061e-21	4.95716e-19	100625349	MXD1	MAX dimerization protein 1 [Source:VGNC Symbol;Acc:VGNC:90492]
CvsSt	ENSSSCG00000008335	1617.28	3.42601	0.568415	6.02731	1.66713e-09	7.16073e-08	100511872	ENSSSCG00000008335
CvsSt	ENSSSCG00000008337	1336.01	2.34417	0.525668	4.45942	8.21829e-06	0.000105851	110255208	AAK1	AP2 associated kinase 1 [Source:VGNC Symbol;Acc:VGNC:100379]
CvsSt	ENSSSCG00000008344	350.759	3.76748	0.734885	5.12662	2.94993e-07	6.58876e-06	100514401	ARHGAP25	Rho GTPase activating protein 25 [Source:VGNC Symbol;Acc:VGNC:85464]
CvsSt	ENSSSCG00000008349	5.97865	5.74536	1.90141	3.02163	0.00251416	0.01109	100737807	CNRIP1	cannabinoid receptor interacting protein 1 [Source:VGNC Symbol;Acc:VGNC:86845]
CvsSt	ENSSSCG00000008357	889.924	4.16878	0.717102	5.81337	6.12259e-09	2.27917e-07	100518067	SPRED2	sprouty related EVH1 domain containing 2 [Source:VGNC Symbol;Acc:VGNC:93421]
CvsSt	ENSSSCG00000008444	234.77	2.19753	0.596819	3.68208	0.000231341	0.00166553	100524932	PRKCE	protein kinase C epsilon [Source:VGNC Symbol;Acc:VGNC:91807]
CvsSt	ENSSSCG00000008509	7.15232	4.33648	1.58211	2.74094	0.0061264	0.0220714	100511446	RASGRP3	RAS guanyl releasing protein 3 [Source:VGNC Symbol;Acc:VGNC:92115]
CvsSt	ENSSSCG00000008522	358.903	2.29661	0.446474	5.14388	2.69116e-07	6.11145e-06	100515259	XDH	xanthine dehydrogenase [Source:VGNC Symbol;Acc:VGNC:94995]
CvsSt	ENSSSCG00000008544	12.15	4.62943	1.66948	2.77297	0.00555466	0.0204767	102158482	ENSSSCG00000008544	chromosome 3 C2orf16 homolog [Source:VGNC Symbol;Acc:VGNC:86020]
CvsSt	ENSSSCG00000008563	4.5023	5.29372	1.85278	2.85718	0.00427423	0.0167312	100737895	KCNK3	potassium two pore domain channel subfamily K member 3 [Source:VGNC Symbol;Acc:VGNC:89370]
CvsSt	ENSSSCG00000008564	3.50596	4.69407	1.71999	2.72912	0.00635032	0.0226831	100737617	CIB4	calcium and integrin binding family member 4 [Source:VGNC Symbol;Acc:VGNC:86697]
CvsSt	ENSSSCG00000008568	35.4203	2.7424	0.860244	3.18793	0.00143297	0.00714413	102159735	DRC1	dynein regulatory complex subunit 1 [Source:VGNC Symbol;Acc:VGNC:87440]
CvsSt	ENSSSCG00000008613	11.083	2.4184	0.875649	2.76184	0.00574762	0.0210167	100517338	GEN1	GEN1 Holliday junction 5' flap endonuclease [Source:VGNC Symbol;Acc:VGNC:88417]
CvsSt	ENSSSCG00000008617	5683.03	10.608	0.712849	14.8812	4.36893e-50	2.0736e-46	100518011	CYRIA	CYFIP related Rac1 interactor A [Source:VGNC Symbol;Acc:VGNC:87131]
CvsSt	ENSSSCG00000008618	92.1337	5.4531	0.744487	7.32464	2.39542e-13	2.419e-11	100518190	MYCN	MYCN proto-onco, bHLH transcription factor [Source:VGNC Symbol;Acc:VGNC:90504]
CvsSt	ENSSSCG00000008712	382.837	5.54707	0.968978	5.72465	1.03644e-08	3.61044e-07	100737053	PPP2R2C	protein phosphatase 2 regulatory subunit Bgamma [Source:VGNC Symbol;Acc:VGNC:91749]
CvsSt	ENSSSCG00000008727	30.582	4.77568	1.06033	4.50396	6.66988e-06	8.9209e-05	100302364	MSX1	msh homeobox 1 [Source:VGNC Symbol;Acc:VGNC:90431]
CvsSt	ENSSSCG00000008765	536.92	5.77094	0.968786	5.95688	2.57098e-09	1.05421e-07	100520035	PCDH7	protocadherin 7 [Source:NCBI gene (formerly Entrezgene);Acc:100520035]
CvsSt	ENSSSCG00000008835	276.41	7.95327	1.12371	7.07771	1.46553e-12	1.36388e-10	100521670	RASL11B	RAS like family 11 member B [Source:VGNC Symbol;Acc:VGNC:92120]
CvsSt	ENSSSCG00000008838	1134.81	2.63705	0.519181	5.07925	3.78928e-07	8.16566e-06	100523319	LNX1	ligand of numb-protein X 1 [Source:VGNC Symbol;Acc:VGNC:89773]
CvsSt	ENSSSCG00000008888	9.48584	6.37758	1.77008	3.60298	0.000314588	0.00213225	397547	NPY1R	neuropeptide Y receptor Y1 [Source:VGNC Symbol;Acc:VGNC:90865]
CvsSt	ENSSSCG00000008937	21.174	4.59976	1.40719	3.26876	0.0010802	0.00569497	397102	AMBN	ameloblastin [Source:VGNC Symbol;Acc:VGNC:85273]
CvsSt	ENSSSCG00000008972	8.0404	5.86222	1.60641	3.64926	0.000262995	0.00184515	100511942	PPEF2	protein phosphatase with EF-hand domain 2 [Source:VGNC Symbol;Acc:VGNC:91690]
CvsSt	ENSSSCG00000008995	42.1362	5.40866	1.15396	4.68703	2.77196e-06	4.33543e-05	100513994	LRAT	lecithin retinol acyltransferase [Source:VGNC Symbol;Acc:VGNC:89798]
CvsSt	ENSSSCG00000009031	336.083	2.97009	0.724307	4.1006	4.12087e-05	0.000407897	397457	EDNRA	endothelin receptor type A [Source:VGNC Symbol;Acc:VGNC:87549]
CvsSt	ENSSSCG00000009045	200.825	6.86468	1.0533	6.5173	7.15859e-11	4.38406e-09	100525059	HHIP	hedgehog interacting protein [Source:VGNC Symbol;Acc:VGNC:88875]
CvsSt	ENSSSCG00000009115	31.2268	5.00834	1.35053	3.70841	0.000208563	0.00152997	100525060	NDST3	N-deacetylase and N-sulfotransferase 3 [Source:VGNC Symbol;Acc:VGNC:90635]
CvsSt	ENSSSCG00000009141	1145.34	2.00608	0.290444	6.90695	4.95169e-12	4.01743e-10	100623186	MCUB	mitochondrial calcium uniporter dominant negative subunit beta [Source:VGNC Symbol;Acc:VGNC:90086]
CvsSt	ENSSSCG00000009148	5021.52	9.71313	0.797505	12.1794	4.00203e-34	2.37433e-31	100170126	LEF1	lymphoid enhancer binding factor 1 [Source:VGNC Symbol;Acc:VGNC:89676]
CvsSt	ENSSSCG00000009181	1091.56	5.80928	0.7644	7.59979	2.96616e-14	3.63307e-12	102162335	C4orf17	chromosome 8 C4orf17 homolog [Source:VGNC Symbol;Acc:VGNC:86079]
CvsSt	ENSSSCG00000009194	4.26089	4.21644	1.58862	2.65416	0.00795071	0.0271239	100623584	HPGDS	hematopoietic prostaglandin D synthase [Source:VGNC Symbol;Acc:VGNC:88962]
CvsSt	ENSSSCG00000009237	307.57	2.00167	0.799363	2.50408	0.0122771	0.037992	100271932	HPSE	heparanase [Source:VGNC Symbol;Acc:VGNC:88967]
CvsSt	ENSSSCG00000009250	157.811	7.04891	1.19531	5.89713	3.69883e-09	1.44118e-07	100512796	PRKG2	protein kinase cGMP-dependent 2 [Source:VGNC Symbol;Acc:VGNC:91817]
CvsSt	ENSSSCG00000009283	837.314	2.3402	0.443097	5.28145	1.28163e-07	3.22275e-06	100521146	TNFRSF19	TNF receptor superfamily member 19 [Source:VGNC Symbol;Acc:VGNC:94263]
CvsSt	ENSSSCG00000009285	2.54792	4.50653	1.725	2.61248	0.00898876	0.0297893	100522569	ENSSSCG00000009285
CvsSt	ENSSSCG00000009290	987.39	3.68337	0.745332	4.94192	7.73589e-07	1.49102e-05	100155148	MIPEP	mitochondrial intermediate peptidase [Source:VGNC Symbol;Acc:VGNC:90236]
CvsSt	ENSSSCG00000009354	165.077	4.18533	0.688661	6.07749	1.2208e-09	5.41514e-08	100156017	CCNA1	cyclin A1 [Source:VGNC Symbol;Acc:VGNC:86348]
CvsSt	ENSSSCG00000009399	71.4605	3.14759	0.933253	3.3727	0.000744346	0.00424749	397243	CYSLTR2	cysteinyl leukotriene receptor 2 [Source:NCBI gene (formerly Entrezgene);Acc:397243]
CvsSt	ENSSSCG00000009405	6464.66	2.15736	0.532058	4.05474	5.01894e-05	0.000479299	399540	SUCLA2	succinate-CoA ligase ADP-forming subunit beta [Source:HGNC Symbol;Acc:HGNC:11448]
CvsSt	ENSSSCG00000009432	198.887	2.00405	0.722573	2.77349	0.0055458	0.0204627	100526190	DGKD	diacylglycerol kinase delta [Source:VGNC Symbol;Acc:VGNC:96180]
CvsSt	ENSSSCG00000009477	81.0777	8.17159	1.88104	4.34419	1.39791e-05	0.000165045	414911	EDNRB	endothelin receptor type B [Source:VGNC Symbol;Acc:VGNC:87550]
CvsSt	ENSSSCG00000009490	1356.92	6.91391	1.33645	5.17334	2.29946e-07	5.36965e-06	574066	DCT	dopachrome tautomerase [Source:VGNC Symbol;Acc:VGNC:87192]
CvsSt	ENSSSCG00000009500	593.753	3.32169	0.681352	4.87515	1.08726e-06	1.99437e-05	100153752	CLDN10	claudin 10 [Source:NCBI gene (formerly Entrezgene);Acc:100153752]
CvsSt	ENSSSCG00000009543	21.837	6.95239	1.70253	4.08356	4.43508e-05	0.000433351	102161679	ENSSSCG00000009543
CvsSt	ENSSSCG00000009572	29.1524	2.86901	1.12176	2.55759	0.0105401	0.0337161	100738776	RNF17	ring finger protein 17 [Source:VGNC Symbol;Acc:VGNC:92369]
CvsSt	ENSSSCG00000009578	89.0248	4.26465	0.641098	6.65211	2.88921e-11	1.98021e-09	100157041	ENSSSCG00000009578	cyclin dependent kinase 20 [Source:NCBI gene (formerly Entrezgene);Acc:100157041]
CvsSt	ENSSSCG00000009580	2101.54	7.56154	0.852015	8.87489	7.00002e-19	1.32895e-16	100154607	S1PR3	sphingosine-1-phosphate receptor 3 [Source:VGNC Symbol;Acc:VGNC:92553]
CvsSt	ENSSSCG00000009605	6.20582	5.71358	1.61448	3.53897	0.000401698	0.00259307	102166950	GFRA2	GDNF family receptor alpha 2 [Source:VGNC Symbol;Acc:VGNC:88429]
CvsSt	ENSSSCG00000009612	34.322	2.50296	0.562505	4.44967	8.60014e-06	0.00010962	100152025	DOK2	docking protein 2 [Source:VGNC Symbol;Acc:VGNC:87402]
CvsSt	ENSSSCG00000009620	111.941	2.94379	0.535417	5.49812	3.83858e-08	1.13337e-06	100156461	BMP1	bone morphotic protein 1 [Source:VGNC Symbol;Acc:VGNC:85838]
CvsSt	ENSSSCG00000009625	992.62	2.00412	0.603946	3.31837	0.000905457	0.00494252	100737811	ENSSSCG00000009625	PDZ and LIM domain 2 [Source:VGNC Symbol;Acc:VGNC:91282]
CvsSt	ENSSSCG00000009630	151.24	2.28685	0.637855	3.58521	0.000336804	0.00224911	100516296	EGR3	early growth response 3 [Source:VGNC Symbol;Acc:VGNC:87591]
CvsSt	ENSSSCG00000009631	3.59571	4.21375	1.64264	2.56523	0.0103109	0.0331333	100302365	PEBP4	phosphatidylethanolamine binding protein 4 [Source:VGNC Symbol;Acc:VGNC:91303]
CvsSt	ENSSSCG00000009633	1693.69	2.08639	0.480145	4.34533	1.39065e-05	0.000164393	100737977	ENSSSCG00000009633
CvsSt	ENSSSCG00000009642	16.4917	5.80412	1.66638	3.48308	0.000495679	0.0030703	100125345	STC1	stanniocalcin 1 [Source:VGNC Symbol;Acc:VGNC:93542]
CvsSt	ENSSSCG00000009650	151.622	2.56885	0.467508	5.49477	3.91218e-08	1.14973e-06	100510985	DOCK5	dedicator of cytokinesis 5 [Source:VGNC Symbol;Acc:VGNC:87395]
CvsSt	ENSSSCG00000009653	28.199	4.24238	0.938201	4.52182	6.13093e-06	8.34976e-05	100156303	CDCA2	cell division cycle associated 2 [Source:VGNC Symbol;Acc:VGNC:86465]
CvsSt	ENSSSCG00000009751	229.659	4.29695	0.633614	6.78165	1.18812e-11	8.98666e-10	100511782	FZD10	frizzled class receptor 10 [Source:VGNC Symbol;Acc:VGNC:88279]
CvsSt	ENSSSCG00000009764	281.189	3.96269	0.473403	8.37065	5.73033e-17	9.98077e-15	100521520	CCDC92	coiled-coil domain containing 92 [Source:VGNC Symbol;Acc:VGNC:86330]
CvsSt	ENSSSCG00000009765	83.1075	2.76265	0.62096	4.449	8.62706e-06	0.000109775	100157315	DNAH10	dynein axonemal heavy chain 10 [Source:VGNC Symbol;Acc:VGNC:87367]
CvsSt	ENSSSCG00000009789	6.94728	5.35206	1.76371	3.03455	0.00240896	0.0107256	100153287	HCAR1	hydroxycarboxylic acid receptor 1 [Source:VGNC Symbol;Acc:VGNC:88797]
CvsSt	ENSSSCG00000009831	213.569	2.38276	0.554533	4.29687	1.73229e-05	0.000198957	100153673	CUX2	cut like homeobox 2 [Source:VGNC Symbol;Acc:VGNC:87094]
CvsSt	ENSSSCG00000009859	446.884	4.25394	0.585678	7.26327	3.77834e-13	3.69752e-11	100155189	TESC	tescalcin [Source:HGNC Symbol;Acc:HGNC:26065]
CvsSt	ENSSSCG00000009860	45.7743	2.5393	0.463453	5.4791	4.27494e-08	1.23719e-06	100156796	FBXW8	F-box and WD repeat domain containing 8 [Source:HGNC Symbol;Acc:HGNC:13597]
CvsSt	ENSSSCG00000009877	18.2887	2.04689	0.783064	2.61395	0.00895016	0.0297061	100525308	IQCD	IQ motif containing D [Source:VGNC Symbol;Acc:VGNC:89187]
CvsSt	ENSSSCG00000009927	18.3881	3.30751	0.894369	3.69815	0.000217179	0.00158035	100153422	FAM222A	family with sequence similarity 222 member A [Source:VGNC Symbol;Acc:VGNC:87959]
CvsSt	ENSSSCG00000009942	31.9306	7.48284	1.63192	4.58531	4.5332e-06	6.49531e-05	397134	DAO	D-amino acid oxidase [Source:VGNC Symbol;Acc:VGNC:87155]
CvsSt	ENSSSCG00000009958	1960.52	4.61169	0.893781	5.15975	2.47279e-07	5.70425e-06	100154854	SEZ6L	seizure related 6 homolog like [Source:VGNC Symbol;Acc:VGNC:92768]
CvsSt	ENSSSCG00000010006	52.8289	4.60975	0.942274	4.89215	9.97388e-07	1.8604e-05	100152451	ENSSSCG00000010006	SEC14 like lipid binding 2 [Source:NCBI gene (formerly Entrezgene);Acc:100152451]
CvsSt	ENSSSCG00000010007	30.5156	3.31893	0.739074	4.49065	7.10047e-06	9.3743e-05	100157687	ENSSSCG00000010007	mitochondrial fission process 1 [Source:VGNC Symbol;Acc:VGNC:90446]
CvsSt	ENSSSCG00000010009	6.52473	3.39582	1.13156	3.00101	0.00269082	0.0117007	100155265	GAL3ST1	galactose-3-O-sulfotransferase 1 [Source:VGNC Symbol;Acc:VGNC:88321]
CvsSt	ENSSSCG00000010055	74.211	2.46073	0.620964	3.96276	7.40875e-05	0.00065696	100157523	GGT5	gamma-glutamyltransferase 5 [Source:VGNC Symbol;Acc:VGNC:88439]
CvsSt	ENSSSCG00000010056	131.734	5.17187	0.773158	6.68928	2.24279e-11	1.60073e-09	397095	ENSSSCG00000010056	gamma-glutamyltransferase 1 [Source:NCBI gene (formerly Entrezgene);Acc:397095]
CvsSt	ENSSSCG00000010115	137.592	7.16067	1.26238	5.67236	1.40844e-08	4.74098e-07	100152323	GSC2	goosecoid homeobox 2 [Source:VGNC Symbol;Acc:VGNC:88715]
CvsSt	ENSSSCG00000010138	8.99025	2.22087	0.886656	2.50477	0.0122532	0.0379489	100157140	ZDHHC8	zinc finger DHHC-type palmitoyltransferase 8 [Source:VGNC Symbol;Acc:VGNC:95130]
CvsSt	ENSSSCG00000010144	98.6853	2.23103	0.643397	3.46758	0.000525176	0.00321007	100157406	ACTN2	actinin alpha 2 [Source:VGNC Symbol;Acc:VGNC:85046]
CvsSt	ENSSSCG00000010151	4925.29	2.2788	0.506452	4.49954	6.81011e-06	9.05392e-05	100049676	LYST	lysosomal trafficking regulator [Source:VGNC Symbol;Acc:VGNC:89921]
CvsSt	ENSSSCG00000010162	145.256	5.14758	0.783768	6.56774	5.10854e-11	3.23286e-09	100157650	SLC35F3	solute carrier family 35 member F3 [Source:VGNC Symbol;Acc:VGNC:93083]
CvsSt	ENSSSCG00000010245	37.6008	2.26592	0.849468	2.66746	0.00764279	0.0263241	100157127	STOX1	storkhead box 1 [Source:VGNC Symbol;Acc:VGNC:93569]
CvsSt	ENSSSCG00000010252	104.301	4.71513	0.752742	6.26393	3.75394e-10	1.9153e-08	100153520	HKDC1	hexokinase domain containing 1 [Source:VGNC Symbol;Acc:VGNC:88894]
CvsSt	ENSSSCG00000010276	2266.22	3.69462	0.559695	6.60113	4.08045e-11	2.65299e-09	733600	UNC5B	unc-5 netrin receptor B [Source:VGNC Symbol;Acc:VGNC:94708]
CvsSt	ENSSSCG00000010404	51.5424	2.66072	0.695226	3.82712	0.000129649	0.00103915	100156205	ALOX5	arachidonate 5-lipoxygenase [Source:VGNC Symbol;Acc:VGNC:85266]
CvsSt	ENSSSCG00000010432	186.06	2.07361	0.6798	3.05032	0.00228596	0.0102588	100157065	ENSSSCG00000010432	N-acylsphingosine amidohydrolase 2 [Source:VGNC Symbol;Acc:VGNC:97888]
CvsSt	ENSSSCG00000010437	2509.38	4.82633	0.589917	8.18137	2.80635e-16	4.51514e-14	100156262	PAPSS2	3'-phosphoadenosine 5'-phosphosulfate synthase 2 [Source:VGNC Symbol;Acc:VGNC:91173]
CvsSt	ENSSSCG00000010466	9.30672	4.61971	1.80558	2.55858	0.0105102	0.0336485	100153311	FGFBP3	fibroblast growth factor binding protein 3 [Source:VGNC Symbol;Acc:VGNC:88118]
CvsSt	ENSSSCG00000010494	11723.7	5.00659	0.768695	6.51311	7.36108e-11	4.49357e-09	100153151	SORBS1	sorbin and SH3 domain containing 1 [Source:VGNC Symbol;Acc:VGNC:93337]
CvsSt	ENSSSCG00000010505	36.5074	5.77027	1.26564	4.55918	5.13544e-06	7.21441e-05	100518694	DNTT	DNA nucleotidylexotransferase [Source:VGNC Symbol;Acc:VGNC:87386]
CvsSt	ENSSSCG00000010507	19.818	7.1977	1.68303	4.27663	1.89743e-05	0.000214805	100157589	TLL2	tolloid like 2 [Source:VGNC Symbol;Acc:VGNC:94019]
CvsSt	ENSSSCG00000010512	3.5306	4.75795	1.59259	2.98755	0.00281227	0.0121013	100627880	SLIT1	slit guidance ligand 1 [Source:HGNC Symbol;Acc:HGNC:11085]
CvsSt	ENSSSCG00000010527	6.04404	4.41063	1.72174	2.56174	0.010415	0.0333833
CvsSt	ENSSSCG00000010530	1649.65	4.47598	0.750853	5.96119	2.504e-09	1.0312e-07	100037974	CRTAC1	cartilage acidic protein 1 [Source:VGNC Symbol;Acc:VGNC:87004]
CvsSt	ENSSSCG00000010536	64.8601	5.52458	1.69645	3.25655	0.00112776	0.00589375	100154357	CNNM1	cyclin and CBS domain divalent metal cation transport mediator 1 [Source:VGNC Symbol;Acc:VGNC:86827]
CvsSt	ENSSSCG00000010577	413.51	7.06164	0.943381	7.48546	7.12968e-14	8.10521e-12	100155434	ELOVL3	ELOVL fatty acid elongase 3 [Source:VGNC Symbol;Acc:VGNC:87659]
CvsSt	ENSSSCG00000010626	52.1885	2.08626	0.414572	5.03232	4.84588e-07	1.0094e-05	100157563	ENSSSCG00000010626
CvsSt	ENSSSCG00000010632	31.6336	7.84426	1.80366	4.34909	1.36704e-05	0.000161904	100152297	TECTB	tectorin beta [Source:VGNC Symbol;Acc:VGNC:93860]
CvsSt	ENSSSCG00000010640	14.9322	2.16598	0.838513	2.58312	0.0097911	0.0318513	733691	NRAP	nebulin related anchoring protein [Source:VGNC Symbol;Acc:VGNC:90888]
CvsSt	ENSSSCG00000010648	5640.74	2.14002	0.530115	4.0369	5.41629e-05	0.000507793	100152319	CCDC186	coiled-coil domain containing 186 [Source:VGNC Symbol;Acc:VGNC:86280]
CvsSt	ENSSSCG00000010649	200.571	2.8584	0.448708	6.37029	1.88669e-10	1.02339e-08	100152718	VWA2	von Willebrand factor A domain containing 2 [Source:VGNC Symbol;Acc:VGNC:94881]
CvsSt	ENSSSCG00000010650	5084.24	6.8113	0.754037	9.03311	1.6686e-19	3.51981e-17	100157959	ENSSSCG00000010650
CvsSt	ENSSSCG00000010651	4232.82	2.94298	0.472466	6.22898	4.69488e-10	2.32115e-08	100154343	ABLIM1	actin binding LIM protein 1 [Source:VGNC Symbol;Acc:VGNC:84986]
CvsSt	ENSSSCG00000010738	16140.1	3.01861	0.711354	4.24348	2.20083e-05	0.000242079	100155662	ZRANB1	zinc finger RANBP2-type containing 1 [Source:VGNC Symbol;Acc:VGNC:95322]
CvsSt	ENSSSCG00000010746	99.3525	2.38901	0.422064	5.66029	1.51116e-08	5.00687e-07	100157228	ADAM12	ADAM metallopeptidase domain 12 [Source:VGNC Symbol;Acc:VGNC:85063]
CvsSt	ENSSSCG00000010753	1275.83	6.23553	0.791325	7.87986	3.27746e-15	4.71384e-13	100156267	CLRN3	clarin 3 [Source:VGNC Symbol;Acc:VGNC:86782]
CvsSt	ENSSSCG00000010755	1626.34	5.38748	0.687488	7.83648	4.63351e-15	6.42096e-13	100155079	PTPRE	protein tyrosine phosphatase receptor type E [Source:VGNC Symbol;Acc:VGNC:91986]
CvsSt	ENSSSCG00000010761	8.0089	2.62747	1.00488	2.61472	0.00893014	0.0296604	100737116	STK32C	serine/threonine kinase 32C [Source:VGNC Symbol;Acc:VGNC:93554]
CvsSt	ENSSSCG00000010762	60.7342	6.84939	2.09062	3.27625	0.00105196	0.00558487	100512868	DPYSL4	dihydropyrimidinase like 4 [Source:VGNC Symbol;Acc:VGNC:87432]
CvsSt	ENSSSCG00000010768	1.90373	4.05358	1.59423	2.54265	0.0110014	0.0348976	100158140	CFAP46	cilia and flagella associated protein 46 [Source:VGNC Symbol;Acc:VGNC:86601]
CvsSt	ENSSSCG00000010825	1592.57	6.27274	0.906219	6.92188	4.45704e-12	3.64728e-10	100624523	MARK1	microtubule affinity regulating kinase 1 [Source:VGNC Symbol;Acc:VGNC:96411]
CvsSt	ENSSSCG00000010826	1280.51	3.42403	0.760316	4.50343	6.68656e-06	8.9209e-05
CvsSt	ENSSSCG00000010849	31460.5	2.5357	0.655935	3.86578	0.000110735	0.000917638	100523327	WDR26	WD repeat domain 26 [Source:VGNC Symbol;Acc:VGNC:95960]
CvsSt	ENSSSCG00000010896	84.4686	3.20566	0.630957	5.08063	3.7618e-07	8.1249e-06	100520688	ASPM	assembly factor for spindle microtubules [Source:HGNC Symbol;Acc:HGNC:19048]
CvsSt	ENSSSCG00000010912	31.1117	2.22656	0.61076	3.64556	0.00026681	0.00186639	100524038	KIF14	kinesin family member 14 [Source:HGNC Symbol;Acc:HGNC:19181]
CvsSt	ENSSSCG00000010915	169.7	3.48082	0.907232	3.83675	0.000124673	0.00100634	100525121	NAV1	neuron navigator 1 [Source:VGNC Symbol;Acc:VGNC:95725]
CvsSt	ENSSSCG00000010962	756.563	4.88997	0.731236	6.68727	2.27374e-11	1.61674e-09	100519727	FRMD3	FERM domain containing 3 [Source:VGNC Symbol;Acc:VGNC:96031]
CvsSt	ENSSSCG00000010967	519.017	2.66515	0.582973	4.57166	4.83885e-06	6.85564e-05	445453	CCL27	C-C motif chemokine ligand 27 [Source:VGNC Symbol;Acc:VGNC:95486]
CvsSt	ENSSSCG00000011001	306.748	2.53195	0.483754	5.23397	1.65907e-07	4.02265e-06	387596	APTX	aprataxin [Source:VGNC Symbol;Acc:VGNC:95724]
CvsSt	ENSSSCG00000011014	5635.05	4.82795	0.537682	8.9792	2.72753e-19	5.50873e-17	449001	BAMBI	BMP and activin membrane bound inhibitor [Source:VGNC Symbol;Acc:VGNC:96238]
CvsSt	ENSSSCG00000011051	11953.7	2.87192	0.546145	5.25852	1.45218e-07	3.58048e-06	100510924	HSPA14	heat shock protein family A (Hsp70) member 14 [Source:VGNC Symbol;Acc:VGNC:96675]
CvsSt	ENSSSCG00000011056	763.835	2.68035	0.477336	5.61524	1.9629e-08	6.31622e-07	100737056	FRMD4A	FERM domain containing 4A [Source:VGNC Symbol;Acc:VGNC:96088]
CvsSt	ENSSSCG00000011059	32.353	7.60723	1.79763	4.23182	2.31811e-05	0.000252782
CvsSt	ENSSSCG00000011069	63.6709	3.22675	0.787793	4.09593	4.20469e-05	0.000415112	100516925	ODAD2	outer dynein arm docking complex subunit 2 [Source:VGNC Symbol;Acc:VGNC:96092]
CvsSt	ENSSSCG00000011071	138.087	2.14359	0.457706	4.68333	2.82249e-06	4.38862e-05	100517488	THNSL1	threonine synthase like 1 [Source:VGNC Symbol;Acc:VGNC:96116]
CvsSt	ENSSSCG00000011111	771.302	3.67444	0.603973	6.08377	1.17387e-09	5.23141e-08	100511150	CAMK1D	calcium/calmodulin dependent protein kinase ID [Source:VGNC Symbol;Acc:VGNC:95909]
CvsSt	ENSSSCG00000011147	3.98471	4.92307	1.57006	3.1356	0.00171502	0.00824924	733634	AKR1C2	aldo-keto reductase family 1, member C1 [Source:NCBI gene (formerly Entrezgene);Acc:733634]
CvsSt	ENSSSCG00000011198	59.0945	2.37762	0.530263	4.48385	7.33073e-06	9.65144e-05	100155924	RFTN1	raftlin, lipid raft linker 1 [Source:VGNC Symbol;Acc:VGNC:92241]
CvsSt	ENSSSCG00000011207	34.2445	2.17994	0.597576	3.64797	0.00026432	0.00185129	100520101	SGO1	shugoshin 1 [Source:VGNC Symbol;Acc:VGNC:92796]
CvsSt	ENSSSCG00000011216	5.43124	4.42127	1.62972	2.7129	0.00666981	0.0235936	100523139	LRRC3B	leucine rich repeat containing 3B [Source:VGNC Symbol;Acc:VGNC:89838]
CvsSt	ENSSSCG00000011255	5.6151	3.78937	1.54207	2.45732	0.0139979	0.0419827	100158221	SLC22A14	solute carrier family 22 member 14 [Source:VGNC Symbol;Acc:VGNC:92974]
CvsSt	ENSSSCG00000011269	230.201	4.87799	0.881904	5.5312	3.18053e-08	9.66117e-07	100156583	MYRIP	myosin VIIA and Rab interacting protein [Source:NCBI gene (formerly Entrezgene);Acc:100156583]
CvsSt	ENSSSCG00000011277	11.5159	5.22458	1.62156	3.22194	0.00127326	0.00648588	397468	CCK	cholecystokinin [Source:VGNC Symbol;Acc:VGNC:86334]
CvsSt	ENSSSCG00000011280	226.479	4.81401	0.770413	6.2486	4.14136e-10	2.0694e-08	100155402	VIPR1	vasoactive intestinal peptide receptor 1 [Source:VGNC Symbol;Acc:VGNC:94827]
CvsSt	ENSSSCG00000011316	69.237	4.17324	0.935937	4.45889	8.2385e-06	0.000106039	414377	CCR9	C-C motif chemokine receptor 9 [Source:VGNC Symbol;Acc:VGNC:86374]
CvsSt	ENSSSCG00000011317	15603	2.95555	0.673696	4.38706	1.14893e-05	0.000139912	100151740	FYCO1	FYVE and coiled-coil domain autophagy adaptor 1 [Source:VGNC Symbol;Acc:VGNC:88275]
CvsSt	ENSSSCG00000011318	166.249	4.35239	0.966718	4.50224	6.72412e-06	8.96471e-05	414376	CXCR6	C-X-C motif chemokine receptor 6 [Source:VGNC Symbol;Acc:VGNC:87110]
CvsSt	ENSSSCG00000011327	2.9986	4.64778	1.55667	2.98571	0.00282918	0.012163
CvsSt	ENSSSCG00000011349	8.31235	5.12984	1.98428	2.58524	0.00973122	0.0317162	100144483	NPG1	protegrin 4 [Source:NCBI gene (formerly Entrezgene);Acc:396871]
CvsSt	ENSSSCG00000011386	290.868	2.82345	0.634169	4.45221	8.49905e-06	0.000108796	100512987	MST1	macrophage stimulating 1 [Source:HGNC Symbol;Acc:HGNC:7380]
CvsSt	ENSSSCG00000011397	1587.22	9.21041	1.03251	8.92042	4.64512e-19	9.09152e-17	100156039	SLC38A3	solute carrier family 38 member 3 [Source:VGNC Symbol;Acc:VGNC:93095]
CvsSt	ENSSSCG00000011398	1728.82	4.29502	0.77033	5.57555	2.46744e-08	7.75569e-07	100153225	SEMA3F	semaphorin 3F [Source:VGNC Symbol;Acc:VGNC:92698]
CvsSt	ENSSSCG00000011400	191.917	3.17216	0.477446	6.64402	3.05245e-11	2.06231e-09	100153200	SEMA3B	semaphorin 3B [Source:VGNC Symbol;Acc:VGNC:92694]
CvsSt	ENSSSCG00000011437	1262.59	2.47545	0.500458	4.94638	7.56069e-07	1.46469e-05	100307125	ALAS1	aminolevulinate, delta-, synthase 1 pseudo [Source:NCBI gene (formerly Entrezgene);Acc:100307125]
CvsSt	ENSSSCG00000011444	191.105	2.72432	0.476775	5.71407	1.10307e-08	3.81454e-07	100154818	NT5DC2	5'-nucleotidase domain containing 2 [Source:VGNC Symbol;Acc:VGNC:90923]
CvsSt	ENSSSCG00000011461	4.30629	4.57994	1.65149	2.77322	0.00555045	0.0204721	106505617	LRTM1	leucine rich repeats and transmembrane domains 1 [Source:VGNC Symbol;Acc:VGNC:89865]
CvsSt	ENSSSCG00000011474	2983.22	2.33997	0.498769	4.69148	2.71235e-06	4.25922e-05	100515860	PXK	PX domain containing serine/threonine kinase like [Source:VGNC Symbol;Acc:VGNC:92015]
CvsSt	ENSSSCG00000011500	294.954	2.40583	0.434654	5.53504	3.11164e-08	9.51165e-07	100623982	KBTBD8	kelch repeat and BTB domain containing 8 [Source:VGNC Symbol;Acc:VGNC:89321]
CvsSt	ENSSSCG00000011587	6.64553	4.13152	1.61975	2.55072	0.0107502	0.0342437	100511535	EFCAB12	EF-hand calcium binding domain 12 [Source:VGNC Symbol;Acc:VGNC:87562]
CvsSt	ENSSSCG00000011609	6.82171	3.489	1.34405	2.59588	0.00943496	0.0309206	100621722	FBLN2	fibulin 2 [Source:HGNC Symbol;Acc:HGNC:3601]
CvsSt	ENSSSCG00000011610	351.188	4.11236	0.840642	4.89192	9.98549e-07	1.8604e-05	100515926	NUP210	nucleoporin 210 [Source:VGNC Symbol;Acc:VGNC:90977]
CvsSt	ENSSSCG00000011618	7.95233	6.17629	1.5326	4.02994	5.57903e-05	0.000520417	396912	GATA2	GATA binding protein 2 [Source:VGNC Symbol;Acc:VGNC:88364]
CvsSt	ENSSSCG00000011627	4048.47	5.19995	0.732833	7.09569	1.2871e-12	1.20968e-10	100302507	ACP3	acid phosphatase 3 [Source:VGNC Symbol;Acc:VGNC:85025]
CvsSt	ENSSSCG00000011630	18.4049	2.2892	0.791946	2.8906	0.00384503	0.0154385	100037292	ACKR4	atypical chemokine receptor 4 [Source:VGNC Symbol;Acc:VGNC:85013]
CvsSt	ENSSSCG00000011640	117.009	9.66929	1.70614	5.66736	1.45013e-08	4.85685e-07	396996	TF	transferrin [Source:NCBI gene (formerly Entrezgene);Acc:396996]
CvsSt	ENSSSCG00000011641	204.621	5.89501	0.906166	6.50544	7.74656e-11	4.69867e-09	100144510	SLCO2A1	solute carrier organic anion transporter family member 2A1 [Source:VGNC Symbol;Acc:VGNC:93195]
CvsSt	ENSSSCG00000011663	161.009	9.0665	2.12435	4.26789	1.97332e-05	0.000221677	407611	RBP2	retinol binding protein 2 [Source:NCBI gene (formerly Entrezgene);Acc:407611]
CvsSt	ENSSSCG00000011664	81.568	3.08676	0.897971	3.43749	0.000587143	0.0035197	100156666	RBP1	retinol binding protein 1 [Source:NCBI gene (formerly Entrezgene);Acc:100156666]
CvsSt	ENSSSCG00000011695	17.2846	3.53405	1.06424	3.32072	0.000897856	0.00490668	100519976	AGTR1	angiotensin II receptor type 1 [Source:VGNC Symbol;Acc:VGNC:85191]
CvsSt	ENSSSCG00000011701	25.004	5.99589	1.52579	3.92969	8.50566e-05	0.000734668	100522214	TM4SF18	transmembrane 4 L six family member 18 [Source:VGNC Symbol;Acc:VGNC:94031]
CvsSt	ENSSSCG00000011703	32.7647	6.3777	1.64668	3.87307	0.000107475	0.000896491	100522400	TM4SF4	transmembrane 4 L six family member 4 [Source:VGNC Symbol;Acc:VGNC:94032]
CvsSt	ENSSSCG00000011708	2007.58	2.46453	0.781936	3.15183	0.00162252	0.00789228	100155608	TSC22D2	TSC22 domain family member 2 [Source:VGNC Symbol;Acc:VGNC:94482]
CvsSt	ENSSSCG00000011732	2412.92	2.06741	0.268097	7.71143	1.24419e-14	1.62903e-12	100152755	TRIM59	tripartite motif containing 59 [Source:VGNC Symbol;Acc:VGNC:101498]
CvsSt	ENSSSCG00000011755	33.6663	2.83069	0.661315	4.2804	1.86558e-05	0.000212211	100154209	NCEH1	neutral cholesterol ester hydrolase 1 [Source:VGNC Symbol;Acc:VGNC:98147]
CvsSt	ENSSSCG00000011765	9.71626	2.76031	0.871909	3.16583	0.00154642	0.00759802	100524109	USP13	ubiquitin specific peptidase 13 [Source:VGNC Symbol;Acc:VGNC:94746]
CvsSt	ENSSSCG00000011766	54.506	5.98133	1.31397	4.55212	5.31088e-06	7.4083e-05	100524828	PEX5L	peroxisomal biosis factor 5 like [Source:VGNC Symbol;Acc:VGNC:91329]
CvsSt	ENSSSCG00000011793	515.12	2.57581	0.345362	7.4583	8.76455e-14	9.78794e-12	100737989	LIPH	lipase H [Source:VGNC Symbol;Acc:VGNC:89740]
CvsSt	ENSSSCG00000011795	539.258	2.60217	0.43658	5.96035	2.51695e-09	1.03429e-07	100157731	IGF2BP2	insulin like growth factor 2 mRNA binding protein 2 [Source:VGNC Symbol;Acc:VGNC:89055]
CvsSt	ENSSSCG00000011799	38.5666	8.45874	1.67301	5.05599	4.28159e-07	9.11277e-06	397585	AHSG	alpha 2-HS glycoprotein [Source:HGNC Symbol;Acc:HGNC:349]
CvsSt	ENSSSCG00000011800	222.374	9.41723	1.64343	5.73024	1.00288e-08	3.52692e-07	100517609	FETUB	fetuin B [Source:VGNC Symbol;Acc:VGNC:88091]
CvsSt	ENSSSCG00000011802	49.71	7.39633	1.7178	4.30569	1.66467e-05	0.000192237	396568	KNG1	kininogen 1 [Source:VGNC Symbol;Acc:VGNC:89557]
CvsSt	ENSSSCG00000011821	342.971	4.548	0.894612	5.08377	3.70022e-07	8.01011e-06	100157346	ENSSSCG00000011821	ATPase 13A4 [Source:VGNC Symbol;Acc:VGNC:85640]
CvsSt	ENSSSCG00000011828	151.973	5.68012	0.944271	6.01535	1.79501e-09	7.64088e-08	100523468	FAM43A	family with sequence similarity 43 member A [Source:VGNC Symbol;Acc:VGNC:87970]
CvsSt	ENSSSCG00000011831	2701.87	8.28286	0.758407	10.9214	9.10907e-28	3.84302e-25	100157318	APOD	apolipoprotein D [Source:VGNC Symbol;Acc:VGNC:85422]
CvsSt	ENSSSCG00000011847	20.4284	4.35681	1.14186	3.81553	0.000135889	0.00107808	100512740	ZDHHC19	zinc finger DHHC-type palmitoyltransferase 19 [Source:VGNC Symbol;Acc:VGNC:95121]
CvsSt	ENSSSCG00000011874	34.9994	2.40005	0.900271	2.66592	0.00767791	0.0264259	100153948	PARP14	poly(ADP-ribose) polymerase family member 14 [Source:HGNC Symbol;Acc:HGNC:29232]
CvsSt	ENSSSCG00000011888	145.296	5.00332	0.786381	6.36247	1.98541e-10	1.07387e-08	100522832	GPR156	G protein-coupled receptor 156 [Source:VGNC Symbol;Acc:VGNC:88610]
CvsSt	ENSSSCG00000011906	8.2231	6.25887	2.07411	3.01762	0.00254767	0.0112152	100511781	IGSF11	immunoglobulin superfamily member 11 [Source:VGNC Symbol;Acc:VGNC:89064]
CvsSt	ENSSSCG00000011933	99.617	6.37732	1.20411	5.2963	1.18171e-07	3.00331e-06	100518152	NECTIN3	nectin cell adhesion molecule 3 [Source:VGNC Symbol;Acc:VGNC:90663]
CvsSt	ENSSSCG00000011959	1029.59	2.23254	0.71307	3.13089	0.00174279	0.00835948	100154641	ABI3BP	ABI family member 3 binding protein [Source:HGNC Symbol;Acc:HGNC:17265]
CvsSt	ENSSSCG00000011962	38.3649	2.04685	0.564356	3.62687	0.000286882	0.00197478	102160124	ADGRG7	adhesion G protein-coupled receptor G7 [Source:VGNC Symbol;Acc:VGNC:85134]
CvsSt	ENSSSCG00000011964	8.79404	5.94479	1.74274	3.41117	0.000646838	0.00380868	100522706	LNP1	leukemia NUP98 fusion partner 1 [Source:HGNC Symbol;Acc:HGNC:28014]
CvsSt	ENSSSCG00000011967	11.1003	4.22191	1.6783	2.51559	0.0118834	0.0370704	100524713	ENSSSCG00000011967
CvsSt	ENSSSCG00000011979	5.53224	4.01251	1.54187	2.60237	0.0092583	0.0304837	100153787	GPR15	G protein-coupled receptor 15 [Source:VGNC Symbol;Acc:VGNC:88606]
CvsSt	ENSSSCG00000012001	504.814	3.17864	0.583167	5.45066	5.01838e-08	1.4073e-06	100517310	ROBO1	roundabout guidance receptor 1 [Source:HGNC Symbol;Acc:HGNC:10249]
CvsSt	ENSSSCG00000012031	394.896	2.75095	0.679041	4.05122	5.09511e-05	0.00048438	100294681	CLDN17	claudin 17 [Source:VGNC Symbol;Acc:VGNC:86734]
CvsSt	ENSSSCG00000012049	11.432	5.11391	1.59724	3.20171	0.00136614	0.00685238	100621502	ENSSSCG00000012049	potassium voltage-gated channel subfamily E regulatory subunit 1 [Source:NCBI gene (formerly Entrezgene);Acc:100621502]
CvsSt	ENSSSCG00000012075	9.06351	2.85198	0.912939	3.12395	0.00178441	0.00846935	100517916	FAM3B	FAM3 metabolism regulating signaling molecule B [Source:VGNC Symbol;Acc:VGNC:87968]
CvsSt	ENSSSCG00000012104	118.181	3.81464	0.92696	4.11521	3.86821e-05	0.000386516	100522965	ENSSSCG00000012104
CvsSt	ENSSSCG00000012132	19.5935	3.20858	0.79489	4.03651	5.42531e-05	0.000508389	100158057	ASB9	ankyrin repeat and SOCS box containing 9 [Source:VGNC Symbol;Acc:VGNC:85568]
CvsSt	ENSSSCG00000012133	8.6809	2.58051	0.964302	2.67604	0.0074498	0.0257652	100154431	ASB11	ankyrin repeat and SOCS box containing 11 [Source:VGNC Symbol;Acc:VGNC:85560]
CvsSt	ENSSSCG00000012182	33.4985	3.74797	0.856007	4.37844	1.19534e-05	0.000144822	100152643	PCYT1B	phosphate cytidylyltransferase 1, choline, beta [Source:VGNC Symbol;Acc:VGNC:91237]
CvsSt	ENSSSCG00000012234	106.948	3.0248	0.889902	3.39903	0.000676251	0.00394186	100156108	SRPX	sushi repeat containing protein X-linked [Source:HGNC Symbol;Acc:HGNC:11309]
CvsSt	ENSSSCG00000012238	474.026	2.45673	0.416111	5.90402	3.5475e-09	1.39152e-07	100526026	ENSSSCG00000012238
CvsSt	ENSSSCG00000012298	139.636	2.87252	0.55941	5.13491	2.82275e-07	6.34787e-06	100514745	CACNA1F	calcium voltage-gated channel subunit alpha1 F [Source:HGNC Symbol;Acc:HGNC:1393]
CvsSt	ENSSSCG00000012384	7.50182	3.5884	1.24049	2.89273	0.00381915	0.0153681	100151799	AWAT2	acyl-CoA wax alcohol acyltransferase 2 [Source:VGNC Symbol;Acc:VGNC:85705]
CvsSt	ENSSSCG00000012394	11.2823	3.53933	1.003	3.52873	0.000417553	0.00266821	100519581	GJB1	gap junction protein beta 1 [Source:VGNC Symbol;Acc:VGNC:88462]
CvsSt	ENSSSCG00000012408	12.3175	2.80606	0.869649	3.22666	0.00125243	0.0064021	100151779	NHSL2	NHS like 2 [Source:VGNC Symbol;Acc:VGNC:98155]
CvsSt	ENSSSCG00000012409	20.1691	6.08186	1.84112	3.30335	0.000955374	0.0051704	654297	CITED1	Cbp/p300 interacting transactivator with Glu/Asp rich carboxy-terminal domain 1 [Source:VGNC Symbol;Acc:VGNC:86711]
CvsSt	ENSSSCG00000012517	36.5949	3.0197	0.641948	4.70396	2.55158e-06	4.05032e-05	100525848	ENSSSCG00000012517
CvsSt	ENSSSCG00000012536	87.3897	2.75366	1.10614	2.48942	0.012795	0.0391767	397029	PLP1	proteolipid protein 1 [Source:VGNC Symbol;Acc:VGNC:91569]
CvsSt	ENSSSCG00000012551	652.327	5.60536	0.897147	6.24798	4.158e-10	2.07191e-08	100515872	RNF128	ring finger protein 128 [Source:VGNC Symbol;Acc:VGNC:92354]
CvsSt	ENSSSCG00000012557	9.61755	2.86243	1.17288	2.44051	0.0146664	0.04352	100517135	NUP62CL	nucleoporin 62 C-terminal like [Source:HGNC Symbol;Acc:HGNC:25960]
CvsSt	ENSSSCG00000012590	116.143	6.65187	1.04286	6.37847	1.78861e-10	9.84256e-09	100152966	LHFPL1	LHFPL tetraspan subfamily member 1 [Source:VGNC Symbol;Acc:VGNC:89704]
CvsSt	ENSSSCG00000012595	9.21048	2.42095	0.975523	2.48169	0.0130761	0.0398474	100155794	LRCH2	leucine rich repeats and calponin homology domain containing 2 [Source:VGNC Symbol;Acc:VGNC:89802]
CvsSt	ENSSSCG00000012741	22.9126	4.55892	1.21964	3.73793	0.000185538	0.00138485	100517073	MAMLD1	mastermind like domain containing 1 [Source:HGNC Symbol;Acc:HGNC:2568]
CvsSt	ENSSSCG00000012753	38.1276	8.17559	1.63468	5.00133	5.69366e-07	1.15609e-05	100156266	CNGA2	cyclic nucleotide gated channel subunit alpha 2 [Source:VGNC Symbol;Acc:VGNC:86816]
CvsSt	ENSSSCG00000012759	14609.7	3.81199	0.655625	5.81428	6.08937e-09	2.27125e-07	100152632	ZNF185	zinc finger protein 185 with LIM domain [Source:VGNC Symbol;Acc:VGNC:95201]
CvsSt	ENSSSCG00000012779	266.523	5.94844	0.903383	6.58463	4.56027e-11	2.91504e-09	100519529	ABCD1	ATP binding cassette subfamily D member 1 [Source:VGNC Symbol;Acc:VGNC:84961]
CvsSt	ENSSSCG00000012833	12.4498	5.48229	1.72048	3.1865	0.00144007	0.00717199
CvsSt	ENSSSCG00000012852	15.0753	3.17646	0.898852	3.53391	0.000409458	0.00263332	100514561	CDHR5	cadherin related family member 5 [Source:VGNC Symbol;Acc:VGNC:86492]
CvsSt	ENSSSCG00000012857	3290.66	3.9266	0.729218	5.38467	7.2576e-08	1.95164e-06	100516312	CARS1	cysteinyl-tRNA synthetase 1 [Source:VGNC Symbol;Acc:VGNC:86196]
CvsSt	ENSSSCG00000012880	3658.92	7.02624	0.742745	9.45982	3.0846e-21	7.80816e-19	399527	CPT1A	carnitine palmitoyltransferase 1A [Source:VGNC Symbol;Acc:VGNC:86964]
CvsSt	ENSSSCG00000012882	62.4732	7.16078	1.58746	4.51085	6.45669e-06	8.71217e-05	100520538	TESMIN	testis expressed metallothionein like protein [Source:VGNC Symbol;Acc:VGNC:100871]
CvsSt	ENSSSCG00000012883	18.99	7.33838	1.71579	4.27697	1.89456e-05	0.000214607	397465	GAL	galanin and GMAP prepropeptide [Source:VGNC Symbol;Acc:VGNC:98016]
CvsSt	ENSSSCG00000012941	7.53805	5.14014	1.75264	2.9328	0.00335924	0.0139149	100518596	SLC29A2	solute carrier family 29 member 2 [Source:VGNC Symbol;Acc:VGNC:93043]
CvsSt	ENSSSCG00000012994	24.032	4.18905	1.09196	3.83629	0.000124909	0.00100782	100737751	TIGD3	tigger transposable element derived 3 [Source:VGNC Symbol;Acc:VGNC:93982]
CvsSt	ENSSSCG00000012996	396.177	3.87426	0.682528	5.67634	1.37608e-08	4.64856e-07	100513778	CDC42EP2	CDC42 effector protein 2 [Source:VGNC Symbol;Acc:VGNC:86456]
CvsSt	ENSSSCG00000013044	72.5969	5.30498	0.794296	6.67885	2.4083e-11	1.69969e-09	100522361	FLRT1	fibronectin leucine rich transmembrane protein 1 [Source:VGNC Symbol;Acc:VGNC:88160]
CvsSt	ENSSSCG00000013049	36.9676	3.13106	0.676658	4.62725	3.70559e-06	5.50474e-05	100526032	RCOR2	REST corepressor 2 [Source:VGNC Symbol;Acc:VGNC:92184]
CvsSt	ENSSSCG00000013072	14.4056	4.60515	1.39814	3.29377	0.000988545	0.00531507	444997	FADS2	fatty acid desaturase 2 [Source:VGNC Symbol;Acc:VGNC:87876]
CvsSt	ENSSSCG00000013079	2.88881	4.54393	1.6856	2.69573	0.00702337	0.0245876	100520824	DAGLA	diacylglycerol lipase alpha [Source:VGNC Symbol;Acc:VGNC:87152]
CvsSt	ENSSSCG00000013091	2.8333	4.66514	1.60543	2.90585	0.00366262	0.0148706	110259249	ENSSSCG00000013091
CvsSt	ENSSSCG00000013093	5.80418	3.27467	1.18624	2.76055	0.00577044	0.0210825	100522060	VWCE	von Willebrand factor C and EGF domains [Source:VGNC Symbol;Acc:VGNC:94888]
CvsSt	ENSSSCG00000013095	2.57878	4.31186	1.68771	2.55485	0.0106233	0.0339362	396749	PAG6	pregnancy-associated glycoprotein 6 [Source:NCBI gene (formerly Entrezgene);Acc:396749]
CvsSt	ENSSSCG00000013113	192.117	2.8341	0.588485	4.81592	1.46526e-06	2.54278e-05	100511308	TMEM132A	transmembrane protein 132A [Source:VGNC Symbol;Acc:VGNC:94080]
CvsSt	ENSSSCG00000013258	60.8972	2.42455	0.498427	4.86441	1.14797e-06	2.08957e-05	100516314	HARBI1	harbinger transposase derived 1 [Source:VGNC Symbol;Acc:VGNC:88784]
CvsSt	ENSSSCG00000013273	6.86299	5.78076	1.91872	3.01281	0.0025884	0.0113568	100519885	CHST1	carbohydrate sulfotransferase 1 [Source:VGNC Symbol;Acc:VGNC:86673]
CvsSt	ENSSSCG00000013278	33.1144	5.45742	1.17496	4.64477	3.40463e-06	5.12585e-05	100520775	TSPAN18	tetraspanin 18 [Source:VGNC Symbol;Acc:VGNC:94507]
CvsSt	ENSSSCG00000013292	65.9349	6.33745	1.21988	5.19513	2.04578e-07	4.84883e-06	100523837	PRR5L	proline rich 5 like [Source:VGNC Symbol;Acc:VGNC:91862]
CvsSt	ENSSSCG00000013301	5513.21	3.01237	0.646012	4.66302	3.11605e-06	4.76314e-05	100510890	ELF5	E74 like ETS transcription factor 5 [Source:VGNC Symbol;Acc:VGNC:87644]
CvsSt	ENSSSCG00000013339	936.909	5.34756	0.848492	6.30243	2.9302e-10	1.52829e-08	100519534	ANO3	anoctamin 3 [Source:VGNC Symbol;Acc:VGNC:85356]
CvsSt	ENSSSCG00000013351	931.83	5.03762	0.746419	6.74906	1.48811e-11	1.0908e-09	100521067	NAV2	neuron navigator 2 [Source:VGNC Symbol;Acc:VGNC:90588]
CvsSt	ENSSSCG00000013358	5.04697	4.97124	1.5553	3.19633	0.00139186	0.00696112	100524422	PTPN5	protein tyrosine phosphatase non-receptor type 5 [Source:VGNC Symbol;Acc:VGNC:91981]
CvsSt	ENSSSCG00000013385	7.16194	6.04757	1.70927	3.5381	0.000403021	0.00259985	100515187	INSC	INSC spindle orientation adaptor protein [Source:VGNC Symbol;Acc:VGNC:89149]
CvsSt	ENSSSCG00000013448	3945.8	2.67503	0.590259	4.53197	5.8437e-06	8.03162e-05	100517077	MKNK2	MAPK interacting serine/threonine kinase 2 [Source:VGNC Symbol;Acc:VGNC:90247]
CvsSt	ENSSSCG00000013495	26.6424	2.63482	0.658457	4.00151	6.29388e-05	0.000574468	100521543	ZFR2	zinc finger RNA binding protein 2 [Source:VGNC Symbol;Acc:VGNC:95155]
CvsSt	ENSSSCG00000013517	46.3126	2.18665	0.675149	3.23877	0.00120047	0.00619826	100511003	UHRF1	ubiquitin like with PHD and ring finger domains 1 [Source:VGNC Symbol;Acc:VGNC:94689]
CvsSt	ENSSSCG00000013593	456.007	3.88982	0.691648	5.62398	1.86603e-08	6.02492e-07	448799	ENSSSCG00000013593	C-C motif chemokine ligand 25 [Source:VGNC Symbol;Acc:VGNC:99612]
CvsSt	ENSSSCG00000013594	133.351	7.07069	1.20058	5.88938	3.87642e-09	1.50499e-07	100738368	FBN3	fibrillin 3 [Source:VGNC Symbol;Acc:VGNC:88026]
CvsSt	ENSSSCG00000013617	726.12	10.0996	1.27147	7.94327	1.96924e-15	2.92078e-13	100515074	ELAVL3	ELAV like RNA binding protein 3 [Source:VGNC Symbol;Acc:VGNC:87640]
CvsSt	ENSSSCG00000013642	8.28541	4.24756	1.53476	2.76757	0.00564763	0.0207329	396825	PDE4A	phosphodiesterase 4A [Source:VGNC Symbol;Acc:VGNC:91254]
CvsSt	ENSSSCG00000013767	36.5946	4.73229	1.01007	4.68512	2.79798e-06	4.35765e-05	100513460	PALM3	paralemmin 3 [Source:VGNC Symbol;Acc:VGNC:91161]
CvsSt	ENSSSCG00000013879	94.6926	2.7355	0.476934	5.7356	9.71671e-09	3.44164e-07	100037269	SLC27A1	solute carrier family 27 member 1 [Source:VGNC Symbol;Acc:VGNC:93035]
CvsSt	ENSSSCG00000013885	313.175	2.42186	0.663015	3.6528	0.0002594	0.00182464	100518178	FCHO1	FCH and mu domain containing endocytic adaptor 1 [Source:VGNC Symbol;Acc:VGNC:88065]
CvsSt	ENSSSCG00000013888	15.9123	2.41039	0.682712	3.53061	0.000414609	0.00265386	100518649	JAK3	Janus kinase 3 [Source:VGNC Symbol;Acc:VGNC:89272]
CvsSt	ENSSSCG00000013919	454.242	2.40634	0.533804	4.50791	6.54708e-06	8.80285e-05	100526210	ENSSSCG00000013919	homer scaffold protein 3 [Source:VGNC Symbol;Acc:VGNC:99759]
CvsSt	ENSSSCG00000013927	675.252	2.22883	0.426426	5.22676	1.72502e-07	4.15831e-06	106508326	SLC25A42	solute carrier family 25 member 42 [Source:VGNC Symbol;Acc:VGNC:100861]
CvsSt	ENSSSCG00000014012	14.8825	5.10333	1.6186	3.15292	0.00161645	0.00786881	100518539	GFPT2	glutamine-fructose-6-phosphate transaminase 2 [Source:VGNC Symbol;Acc:VGNC:88427]
CvsSt	ENSSSCG00000014073	6440.19	3.81493	0.57345	6.6526	2.87956e-11	1.98021e-09	396958	HEXB	hexosaminidase subunit beta [Source:VGNC Symbol;Acc:VGNC:88861]
CvsSt	ENSSSCG00000014074	3441.01	3.21851	0.563294	5.71374	1.1052e-08	3.81494e-07	100517638	GFM2	GTP dependent ribosome recycling factor mitochondrial 2 [Source:VGNC Symbol;Acc:VGNC:88423]
CvsSt	ENSSSCG00000014079	77.7813	3.09196	0.532091	5.81096	6.21142e-09	2.29871e-07	100627989	ANKRD31	ankyrin repeat domain 31 [Source:VGNC Symbol;Acc:VGNC:96792]
CvsSt	ENSSSCG00000014108	26.2689	2.66157	0.987826	2.69437	0.00705223	0.0246705	397371	BHMT	betaine--homocysteine S-methyltransferase [Source:VGNC Symbol;Acc:VGNC:85816]
CvsSt	ENSSSCG00000014112	3502.74	5.7973	0.709473	8.17129	3.05117e-16	4.86778e-14	100510894	JMY	junction mediating and regulatory protein, p53 cofactor [Source:VGNC Symbol;Acc:VGNC:89289]
CvsSt	ENSSSCG00000014117	101.767	4.38565	1.06836	4.10502	4.04283e-05	0.000401463	100513005	THBS4	thrombospondin 4 [Source:VGNC Symbol;Acc:VGNC:93949]
CvsSt	ENSSSCG00000014196	3.36062	4.3565	1.83	2.38061	0.0172842	0.0491094	100515882	TMEM232	transmembrane protein 232 [Source:VGNC Symbol;Acc:VGNC:94147]
CvsSt	ENSSSCG00000014214	129.399	2.40258	0.729608	3.29297	0.00099135	0.00532563	100519890	TRIM36	tripartite motif containing 36 [Source:VGNC Symbol;Acc:VGNC:94409]
CvsSt	ENSSSCG00000014235	143.059	9.87224	1.4952	6.60261	4.03968e-11	2.6446e-09	100049698	SNCAIP	synuclein alpha interacting protein [Source:VGNC Symbol;Acc:VGNC:100863]
CvsSt	ENSSSCG00000014249	3684.64	3.43268	0.517754	6.62995	3.35794e-11	2.23686e-09	100513526	MARCHF3	membrane associated ring-CH-type finger 3 [Source:VGNC Symbol;Acc:VGNC:90020]
CvsSt	ENSSSCG00000014284	432.352	2.26261	0.434399	5.20861	1.9026e-07	4.55497e-06
CvsSt	ENSSSCG00000014336	1018.62	2.74006	0.422602	6.48379	8.94487e-11	5.374e-09	100520726	EGR1	early growth response 1 [Source:VGNC Symbol;Acc:VGNC:87590]
CvsSt	ENSSSCG00000014356	484.724	2.21959	0.317706	6.9863	2.82225e-12	2.44659e-10	100524673	DNAJC18	DnaJ heat shock protein family (Hsp40) member C18 [Source:VGNC Symbol;Acc:VGNC:96615]
CvsSt	ENSSSCG00000014361	1727.87	3.93219	0.80532	4.88277	1.04606e-06	1.92998e-05	100521956	ENSSSCG00000014361	cysteine rich transmembrane module containing 1 [Source:VGNC Symbol;Acc:VGNC:87134]
CvsSt	ENSSSCG00000014362	1165.57	2.60328	0.745004	3.49432	0.000475275	0.0029652	397564	HBEGF	heparin binding EGF like growth factor [Source:VGNC Symbol;Acc:VGNC:88792]
CvsSt	ENSSSCG00000014363	957.546	7.05756	0.746849	9.44978	3.3953e-21	8.48156e-19	100738541	SLC4A9	solute carrier family 4 member 9 [Source:VGNC Symbol;Acc:VGNC:93136]
CvsSt	ENSSSCG00000014389	1108.19	2.00798	0.576729	3.48167	0.000498288	0.00308445	100519540	RELL2	RELT like 2 [Source:VGNC Symbol;Acc:VGNC:92207]
CvsSt	ENSSSCG00000014390	2632.71	2.21612	0.630263	3.51619	0.000437785	0.00277508	100511554	FCHSD1	FCH and double SH3 domains 1 [Source:VGNC Symbol;Acc:VGNC:88067]
CvsSt	ENSSSCG00000014391	8.76491	2.29392	0.925896	2.47751	0.0132301	0.0401814	100511744	ARAP3	ArfGAP with RhoGAP domain, ankyrin repeat and PH domain 3 [Source:VGNC Symbol;Acc:VGNC:85441]
CvsSt	ENSSSCG00000014408	13.5086	2.00771	0.70076	2.86504	0.00416955	0.0164094	100525635	PLAC8L1	PLAC8 like 1 [Source:VGNC Symbol;Acc:VGNC:91507]
CvsSt	ENSSSCG00000014430	35.7425	2.73822	1.03893	2.63562	0.00839836	0.0283504	100515194	ABLIM3	actin binding LIM protein family member 3 [Source:VGNC Symbol;Acc:VGNC:84988]
CvsSt	ENSSSCG00000014431	481.575	7.96424	1.0659	7.47183	7.90876e-14	8.93737e-12	100513463	AFAP1L1	actin filament associated protein 1 like 1 [Source:VGNC Symbol;Acc:VGNC:85166]
CvsSt	ENSSSCG00000014433	163.052	3.13438	0.699466	4.4811	7.42578e-06	9.72936e-05	100513977	PCYOX1L	prenylcysteine oxidase 1 like [Source:VGNC Symbol;Acc:VGNC:91236]
CvsSt	ENSSSCG00000014443	9.80459	4.6656	1.59294	2.92892	0.00340141	0.0140351	100626014	CAMK2A	calcium/calmodulin dependent protein kinase II alpha [Source:VGNC Symbol;Acc:VGNC:86155]
CvsSt	ENSSSCG00000014447	8.19558	4.80955	1.5833	3.03768	0.00238407	0.0106273	100516251	SLC6A7	solute carrier family 6 member 7 [Source:VGNC Symbol;Acc:VGNC:93167]
CvsSt	ENSSSCG00000014570	1060.66	4.44193	0.765735	5.80086	6.59741e-09	2.42736e-07	100519788	NRIP3	nuclear receptor interacting protein 3 [Source:HGNC Symbol;Acc:HGNC:1167]
CvsSt	ENSSSCG00000014575	108.427	5.17454	0.955314	5.41659	6.07471e-08	1.66419e-06	100519613	ENSSSCG00000014575
CvsSt	ENSSSCG00000014672	11.661	2.9218	0.829047	3.52429	0.000424623	0.00270973	100738479	ENSSSCG00000014672
CvsSt	ENSSSCG00000014834	23.6459	2.64904	0.672967	3.93635	8.27286e-05	0.000718482	397116	UCP3	uncoupling protein 3 [Source:NCBI gene (formerly Entrezgene);Acc:397116]
CvsSt	ENSSSCG00000014838	898.865	3.97983	0.778191	5.11421	3.15058e-07	6.98042e-06	100515088	PGM2L1	phosphoglucomutase 2 like 1 [Source:VGNC Symbol;Acc:VGNC:91357]
CvsSt	ENSSSCG00000014840	192.938	2.0658	0.640218	3.22671	0.00125222	0.0064021	100624543	P4HA3	prolyl 4-hydroxylase subunit alpha 3 [Source:VGNC Symbol;Acc:VGNC:91134]
CvsSt	ENSSSCG00000014853	723.889	3.84594	0.630755	6.09736	1.07833e-09	4.89762e-08	100627912	GDPD5	glycerophosphodiester phosphodiesterase domain containing 5 [Source:VGNC Symbol;Acc:VGNC:88409]
CvsSt	ENSSSCG00000014854	29.4083	5.00595	0.995232	5.02993	4.90664e-07	1.01695e-05	100521568	KLHL35	kelch like family member 35 [Source:VGNC Symbol;Acc:VGNC:89529]
CvsSt	ENSSSCG00000014860	60.3082	8.87282	1.69123	5.24638	1.55117e-07	3.77551e-06	100519724	MAP6	microtubule associated protein 6 [Source:VGNC Symbol;Acc:VGNC:89990]
CvsSt	ENSSSCG00000014861	19.9235	7.46444	1.98453	3.76132	0.000169021	0.00128922	110255553	MOGAT2	monoacylglycerol O-acyltransferase 2 [Source:NCBI gene (formerly Entrezgene);Acc:100312975]
CvsSt	ENSSSCG00000014869	9.0235	6.20346	1.6745	3.70467	0.000211669	0.00154857	100522452	LRRC32	leucine rich repeat containing 32 [Source:HGNC Symbol;Acc:HGNC:4161]
CvsSt	ENSSSCG00000014876	12.4499	3.9069	1.32254	2.95408	0.00313602	0.0132129	397373	MYO7A	myosin VIIA [Source:VGNC Symbol;Acc:VGNC:90533]
CvsSt	ENSSSCG00000014927	8.71648	6.29934	2.0214	3.11632	0.00183123	0.00863964	100523323	NOX4	NADPH oxidase 4 [Source:VGNC Symbol;Acc:VGNC:90831]
CvsSt	ENSSSCG00000014950	523.283	4.36167	0.680198	6.41236	1.43287e-10	8.17109e-09	100516505	VSTM5	V-set and transmembrane domain containing 5 [Source:VGNC Symbol;Acc:VGNC:94875]
CvsSt	ENSSSCG00000014964	8.52314	3.24459	1.27718	2.54043	0.0110717	0.0350559	100514356	ENSSSCG00000014964
CvsSt	ENSSSCG00000014965	23245.7	2.64274	0.595998	4.43415	9.24374e-06	0.000116529	100526236	ENDOD1	endonuclease domain containing 1 [Source:VGNC Symbol;Acc:VGNC:87697]
CvsSt	ENSSSCG00000014979	33.829	3.47585	0.937937	3.70584	0.000210688	0.00154258	100520090	CEP126	centrosomal protein 126 [Source:HGNC Symbol;Acc:HGNC:29264]
CvsSt	ENSSSCG00000014983	78.7474	4.54171	0.646125	7.02916	2.07786e-12	1.86076e-10	396939	MMP20	matrix metallopeptidase 20 [Source:VGNC Symbol;Acc:VGNC:90275]
CvsSt	ENSSSCG00000015001	127.235	3.41	0.421761	8.08514	6.2092e-16	9.66242e-14	100526002	SLC35F2	solute carrier family 35 member F2 [Source:VGNC Symbol;Acc:VGNC:93082]
CvsSt	ENSSSCG00000015016	2.90559	4.63317	1.58924	2.91534	0.00355304	0.0145157	100512063	POU2AF1	POU class 2 homeobox associating factor 1 [Source:VGNC Symbol;Acc:VGNC:91671]
CvsSt	ENSSSCG00000015019	336.252	3.17448	0.512008	6.20007	5.64387e-10	2.71952e-08	100512618	COLCA2	colorectal cancer associated 2 [Source:HGNC Symbol;Acc:HGNC:26978]
CvsSt	ENSSSCG00000015039	14.121	2.12917	0.608948	3.49647	0.000471462	0.00294528	100517547	BCO2	beta-carotene oxygenase 2 [Source:VGNC Symbol;Acc:VGNC:85790]
CvsSt	ENSSSCG00000015045	26.2524	2.96807	1.00243	2.96088	0.00306764	0.0129824	100515564	NCAM1	neural cell adhesion molecule 1 [Source:HGNC Symbol;Acc:HGNC:7656]
CvsSt	ENSSSCG00000015054	6.79997	4.27192	1.7059	2.5042	0.0122728	0.0379848	100144485	NNMT	nicotinamide N-methyltransferase [Source:VGNC Symbol;Acc:VGNC:90805]
CvsSt	ENSSSCG00000015074	2433.92	2.29782	0.401003	5.73019	1.00318e-08	3.52692e-07	100523197	SIDT2	SID1 transmembrane family member 2 [Source:VGNC Symbol;Acc:VGNC:92869]
CvsSt	ENSSSCG00000015100	69.4364	5.42771	0.903233	6.0092	1.86445e-09	7.90101e-08	397075	UPK2	uroplakin 2 [Source:VGNC Symbol;Acc:VGNC:94723]
CvsSt	ENSSSCG00000015131	51.8604	2.17343	0.480222	4.5259	6.01398e-06	8.21998e-05	100523504	GRIK4	glutamate ionotropic receptor kainate type subunit 4 [Source:VGNC Symbol;Acc:VGNC:88680]
CvsSt	ENSSSCG00000015137	11.3346	2.56138	0.857627	2.98659	0.00282112	0.0121339	100521388	CRTAM	cytotoxic and regulatory T cell molecule [Source:VGNC Symbol;Acc:VGNC:87005]
CvsSt	ENSSSCG00000015234	35.9827	3.37502	0.721775	4.67601	2.92516e-06	4.51864e-05	100515566	KIRREL3	kirre like nephrin family adhesion molecule 3 [Source:VGNC Symbol;Acc:VGNC:89482]
CvsSt	ENSSSCG00000015253	2.04899	4.29195	1.64998	2.60122	0.0092893	0.0305523	100519556	NTM	neurotrimin [Source:VGNC Symbol;Acc:VGNC:98164]
CvsSt	ENSSSCG00000015256	42.7694	2.8197	0.693095	4.06828	4.73621e-05	0.000457826	100520043	JAM3	junctional adhesion molecule 3 [Source:VGNC Symbol;Acc:VGNC:89277]
CvsSt	ENSSSCG00000015285	4.94553	5.44168	1.64668	3.30464	0.000950996	0.00515995	100525178	LRRN2	leucine rich repeat neuronal 2 [Source:VGNC Symbol;Acc:VGNC:89861]
CvsSt	ENSSSCG00000015290	16.3496	3.19214	0.883833	3.6117	0.000304194	0.00207303	100627418	CDK18	cyclin dependent kinase 18 [Source:VGNC Symbol;Acc:VGNC:86501]
CvsSt	ENSSSCG00000015301	130.501	4.96878	0.648849	7.65783	1.89098e-14	2.42569e-12	397573	STEAP1	STEAP family member 1 [Source:NCBI gene (formerly Entrezgene);Acc:397573]
CvsSt	ENSSSCG00000015425	15.6828	6.96585	1.95549	3.5622	0.000367759	0.00241255	100190993	SLC26A5	solute carrier family 26 member 5 [Source:VGNC Symbol;Acc:VGNC:93030]
CvsSt	ENSSSCG00000015445	153.942	4.01282	0.825579	4.86061	1.17022e-06	2.12193e-05	100520970	NRCAM	neuronal cell adhesion molecule [Source:HGNC Symbol;Acc:HGNC:7994]
CvsSt	ENSSSCG00000015462	449.711	2.71886	0.722178	3.76481	0.000166676	0.00127338	100524699	TPK1	thiamin pyrophosphokinase 1 [Source:VGNC Symbol;Acc:VGNC:94337]
CvsSt	ENSSSCG00000015474	88.0407	2.18307	0.722966	3.0196	0.00253109	0.0111543	100512361	PPFIA4	PTPRF interacting protein alpha 4 [Source:VGNC Symbol;Acc:VGNC:91694]
CvsSt	ENSSSCG00000015487	17.6809	2.72239	0.934054	2.9146	0.00356143	0.0145437	100516458	TNFSF18	TNF superfamily member 18 [Source:VGNC Symbol;Acc:VGNC:94272]
CvsSt	ENSSSCG00000015488	60.9048	2.46482	0.604745	4.07581	4.58553e-05	0.000444391	574053	TNFSF4	TNF superfamily member 4 [Source:NCBI gene (formerly Entrezgene);Acc:574053]
CvsSt	ENSSSCG00000015493	105.142	3.01899	0.644485	4.68435	2.80854e-06	4.3705e-05	100125972	SERPINC1	serpin family C member 1 [Source:VGNC Symbol;Acc:VGNC:92740]
CvsSt	ENSSSCG00000015498	2500.79	2.35131	0.519341	4.52749	5.96894e-06	8.17018e-05	100519792	RC3H1	ring finger and CCCH-type domains 1 [Source:VGNC Symbol;Acc:VGNC:92168]
CvsSt	ENSSSCG00000015550	171.27	6.96263	0.914081	7.61708	2.59481e-14	3.20653e-12	397544	RGS16	regulator of G protein signaling 16 [Source:VGNC Symbol;Acc:VGNC:92262]
CvsSt	ENSSSCG00000015563	3667.26	3.7939	0.778821	4.87134	1.10846e-06	2.02648e-05	100515847	RGL1	ral guanine nucleotide dissociation stimulator like 1 [Source:VGNC Symbol;Acc:VGNC:92252]
CvsSt	ENSSSCG00000015581	167.838	2.20333	0.487671	4.51806	6.24087e-06	8.48731e-05	100521032	CENPF	centromere protein F [Source:VGNC Symbol;Acc:VGNC:86548]
CvsSt	ENSSSCG00000015598	109.122	3.17479	0.77455	4.09888	4.15155e-05	0.000410293	100524887	PACC1	proton activated chloride channel 1 [Source:VGNC Symbol;Acc:VGNC:91137]
CvsSt	ENSSSCG00000015600	46.7396	2.29278	0.632669	3.62398	0.000290108	0.0019941	100525066	DTL	denticleless E3 ubiquitin [Source:VGNC Symbol;Acc:VGNC:87461]
CvsSt	ENSSSCG00000015602	299.644	2.11253	0.300923	7.02015	2.21632e-12	1.96621e-10	100622344	INTS7	integrator complex subunit 7 [Source:VGNC Symbol;Acc:VGNC:89167]
CvsSt	ENSSSCG00000015603	361.025	2.00096	0.317253	6.30716	2.84197e-10	1.49046e-08	100622761	LPGAT1	lysophosphatidylglycerol acyltransferase 1 [Source:VGNC Symbol;Acc:VGNC:89792]
CvsSt	ENSSSCG00000015604	66.386	2.13562	0.631732	3.38058	0.000723342	0.00415889	397258	NEK2	NIMA related kinase 2 [Source:VGNC Symbol;Acc:VGNC:90675]
CvsSt	ENSSSCG00000015619	17.8977	2.51769	0.790086	3.1866	0.00143956	0.00717136	100512553	CAMK1G	calcium/calmodulin dependent protein kinase IG [Source:VGNC Symbol;Acc:VGNC:86154]
CvsSt	ENSSSCG00000015645	3176.93	4.79549	0.687948	6.97072	3.15326e-12	2.64888e-10	100518625	ENSSSCG00000015645
CvsSt	ENSSSCG00000015716	9.2063	5.53881	1.90473	2.90793	0.00363832	0.0147909	100516298	MARCO	macrophage receptor with collagenous structure [Source:NCBI gene (formerly Entrezgene);Acc:100516298]
CvsSt	ENSSSCG00000015717	48.9351	8.34293	1.75378	4.75711	1.96383e-06	3.24768e-05	100738874	C1QL2	complement C1q like 2 [Source:VGNC Symbol;Acc:VGNC:96034]
CvsSt	ENSSSCG00000015747	1373.64	3.38146	0.783051	4.31831	1.57228e-05	0.000182679	100523824	ENSSSCG00000015747
CvsSt	ENSSSCG00000015771	51.4169	4.94814	1.05882	4.67326	2.96452e-06	4.57201e-05	100156631	NEIL3	nei like DNA glycosylase 3 [Source:VGNC Symbol;Acc:VGNC:96046]
CvsSt	ENSSSCG00000015781	39.9696	3.25001	0.766558	4.23974	2.23781e-05	0.000245436	100152050	ENPP6	ectonucleotide pyrophosphatase/phosphodiesterase 6 [Source:VGNC Symbol;Acc:VGNC:95999]
CvsSt	ENSSSCG00000015807	3.27933	4.23836	1.71339	2.47367	0.0133733	0.040536	100525542	ADAM32	ADAM metallopeptidase domain 32 [Source:HGNC Symbol;Acc:HGNC:15479]
CvsSt	ENSSSCG00000015808	1885.6	3.80383	0.649736	5.85442	4.78692e-09	1.82489e-07	397344	ADAM9	ADAM metallopeptidase domain 9 [Source:VGNC Symbol;Acc:VGNC:95969]
CvsSt	ENSSSCG00000015814	66.1372	3.01473	0.580693	5.1916	2.08494e-07	4.93549e-06	100624903	ENSSSCG00000015814
CvsSt	ENSSSCG00000015839	115.923	2.72132	0.669996	4.0617	4.87164e-05	0.000468057	102164569	NRG1	neuregulin 1 [Source:VGNC Symbol;Acc:VGNC:96453]
CvsSt	ENSSSCG00000015850	174.041	2.03082	0.600206	3.38354	0.000715568	0.00412544	100514374	DUSP4	dual specificity phosphatase 4 [Source:VGNC Symbol;Acc:VGNC:96248]
CvsSt	ENSSSCG00000015879	16812.2	5.68173	0.585646	9.70163	2.96711e-22	8.66625e-20	100157537	DAPL1	death associated protein like 1 [Source:NCBI gene (formerly Entrezgene);Acc:100157537]
CvsSt	ENSSSCG00000015886	42.9411	2.65561	0.849036	3.12779	0.00176126	0.0084056	100037276	ITGB6	integrin subunit beta 6 [Source:VGNC Symbol;Acc:VGNC:98054]
CvsSt	ENSSSCG00000015894	36.9749	4.90441	1.05105	4.66619	3.06836e-06	4.7054e-05	397492	DPP4	dipeptidyl peptidase 4 [Source:VGNC Symbol;Acc:VGNC:96236]
CvsSt	ENSSSCG00000015896	172.896	8.45995	1.58694	5.33097	9.76888e-08	2.54058e-06	100736572	FAP	fibroblast activation protein alpha [Source:VGNC Symbol;Acc:VGNC:99714]
CvsSt	ENSSSCG00000015903	21.6663	2.97937	1.07151	2.78054	0.0054269	0.0201073	100737086	SLC38A11	solute carrier family 38 member 11 [Source:VGNC Symbol;Acc:VGNC:96143]
CvsSt	ENSSSCG00000015937	142.228	2.70774	0.355498	7.61677	2.60103e-14	3.20653e-12	100520221	KLHL23	kelch like family member 23 [Source:VGNC Symbol;Acc:VGNC:96158]
CvsSt	ENSSSCG00000015954	59.8034	2.77367	0.494965	5.60377	2.09736e-08	6.72609e-07	100523029	DLX2	distal-less homeobox 2 [Source:VGNC Symbol;Acc:VGNC:96200]
CvsSt	ENSSSCG00000015961	134.144	2.18003	0.489551	4.45312	8.46312e-06	0.000108489	100154583	CDCA7	cell division cycle associated 7 [Source:VGNC Symbol;Acc:VGNC:95623]
CvsSt	ENSSSCG00000015965	766.221	3.47079	0.74658	4.64892	3.33682e-06	5.0518e-05	100511231	GPR155	G protein-coupled receptor 155 [Source:VGNC Symbol;Acc:VGNC:95984]
CvsSt	ENSSSCG00000016009	44.2409	2.41897	0.592836	4.08033	4.49721e-05	0.000437395	100521477	ITGA4	integrin subunit alpha 4 [Source:VGNC Symbol;Acc:VGNC:96377]
CvsSt	ENSSSCG00000016010	25.2437	2.2844	0.661036	3.45579	0.000548688	0.00332807	100521824	CERKL	ceramide kinase like [Source:VGNC Symbol;Acc:VGNC:95974]
CvsSt	ENSSSCG00000016062	1311.4	3.95655	0.532764	7.42646	1.11544e-13	1.2312e-11	100155066	NABP1	nucleic acid binding protein 1 [Source:VGNC Symbol;Acc:VGNC:96122]
CvsSt	ENSSSCG00000016104	6077.21	4.60643	0.716472	6.42932	1.28177e-10	7.44171e-09	100511477	TRAK2	trafficking kinesin protein 2 [Source:VGNC Symbol;Acc:VGNC:95577]
CvsSt	ENSSSCG00000016148	2.0854	3.97885	1.60112	2.48505	0.0129534	0.039556	100170146	PTH2R	parathyroid hormone 2 receptor [Source:VGNC Symbol;Acc:VGNC:96516]
CvsSt	ENSSSCG00000016160	14.6139	2.79916	0.863189	3.24281	0.00118357	0.00612821	100525789	ERBB4	erb-b2 receptor tyrosine kinase 4 [Source:VGNC Symbol;Acc:VGNC:96284]
CvsSt	ENSSSCG00000016175	6758.26	2.00958	0.667328	3.01139	0.00260058	0.0114023	100627946	MREG	melanoregulin [Source:VGNC Symbol;Acc:VGNC:96086]
CvsSt	ENSSSCG00000016201	1258.86	2.99324	0.618424	4.8401	1.29771e-06	2.31117e-05	106506366	TTLL4	tubulin tyrosine ligase like 4 [Source:VGNC Symbol;Acc:VGNC:96192]
CvsSt	ENSSSCG00000016202	1758.75	2.15922	0.562861	3.83616	0.000124973	0.00100791	100626865	RNF25	ring finger protein 25 [Source:VGNC Symbol;Acc:VGNC:95626]
CvsSt	ENSSSCG00000016237	88.7606	3.26547	1.14351	2.85566	0.00429481	0.016784	100512141	DOCK10	dedicator of cytokinesis 10 [Source:VGNC Symbol;Acc:VGNC:96007]
CvsSt	ENSSSCG00000016239	21.7413	4.48743	1.37713	3.25854	0.00111985	0.0058628	100620202	NYAP2	neuronal tyrosine-phosphorylated phosphoinositide-3-kinase adaptor 2 [Source:VGNC Symbol;Acc:VGNC:96213]
CvsSt	ENSSSCG00000016256	29.2261	7.95781	1.79997	4.42106	9.82159e-06	0.000122835	100515691	SPHKAP	SPHK1 interactor, AKAP domain containing [Source:VGNC Symbol;Acc:VGNC:96245]
CvsSt	ENSSSCG00000016270	93.4627	5.84893	1.03974	5.62537	1.85107e-08	5.9868e-07	100736598	C2orf72	chromosome 15 C2orf72 homolog [Source:VGNC Symbol;Acc:VGNC:96157]
CvsSt	ENSSSCG00000016286	4.22396	5.02871	1.9169	2.62335	0.00870694	0.0291177	100737499	PRSS56	serine protease 56 [Source:VGNC Symbol;Acc:VGNC:96307]
CvsSt	ENSSSCG00000016290	12029.3	6.10966	0.786037	7.77274	7.68056e-15	1.04154e-12	100153398	EFHD1	EF-hand domain family member D1 [Source:VGNC Symbol;Acc:VGNC:96222]
CvsSt	ENSSSCG00000016295	685.724	2.9758	0.586495	5.07387	3.89814e-07	8.38122e-06	100153801	NGEF	neuronal guanine nucleotide exchange factor [Source:VGNC Symbol;Acc:VGNC:96443]
CvsSt	ENSSSCG00000016297	658.638	6.0546	0.977146	6.19621	5.78406e-10	2.76601e-08	100738467	NEU2	neuraminidase 2 [Source:VGNC Symbol;Acc:VGNC:96438]
CvsSt	ENSSSCG00000016313	11.1211	2.52461	0.908993	2.77737	0.00548005	0.0202647	100154630	HJURP	Holliday junction recognition protein [Source:VGNC Symbol;Acc:VGNC:96081]
CvsSt	ENSSSCG00000016317	600.186	2.99116	0.617187	4.84644	1.25695e-06	2.24489e-05	100620812	AGAP1	ArfGAP with GTPase domain, ankyrin repeat and PH domain 1 [Source:HGNC Symbol;Acc:HGNC:16922]
CvsSt	ENSSSCG00000016321	4.75232	5.3836	1.73279	3.1069	0.00189061	0.00888008	100515512	IQCA1	IQ motif containing with AAA domain 1 [Source:VGNC Symbol;Acc:VGNC:96117]
CvsSt	ENSSSCG00000016342	1137.78	3.85965	0.744712	5.18274	2.18647e-07	5.13104e-06	100622397	HES6	hes family bHLH transcription factor 6 [Source:VGNC Symbol;Acc:VGNC:95877]
CvsSt	ENSSSCG00000016364	1149.4	2.14747	0.656355	3.27182	0.00106859	0.00564788	100525965	GPC1	glypican 1 [Source:VGNC Symbol;Acc:VGNC:96329]
CvsSt	ENSSSCG00000016365	5.59912	3.75514	1.57847	2.37897	0.0173613	0.0492828
CvsSt	ENSSSCG00000016400	64.5515	2.23186	0.502884	4.43813	9.07444e-06	0.000114547	100517432	ENSSSCG00000016400	mab-21 like 4 [Source:VGNC Symbol;Acc:VGNC:96120]
CvsSt	ENSSSCG00000016402	8.25957	2.65692	0.966182	2.74992	0.00596103	0.0216015	100517616	AGXT	alanine--glyoxylate and serine--pyruvate aminotransferase [Source:VGNC Symbol;Acc:VGNC:96282]
CvsSt	ENSSSCG00000016416	9.07909	6.31273	1.66582	3.78956	0.000150916	0.00117472	100512749	SHH	sonic hedgehog signaling molecule [Source:VGNC Symbol;Acc:VGNC:92844]
CvsSt	ENSSSCG00000016420	5642.69	3.17	0.674558	4.69937	2.60963e-06	4.11835e-05	403162	INSIG1	insulin induced 1 [Source:VGNC Symbol;Acc:VGNC:89150]
CvsSt	ENSSSCG00000016448	8.20416	2.71249	0.943379	2.87529	0.00403654	0.0160054	100523293	KCNH2	potassium voltage-gated channel subfamily H member 2 [Source:VGNC Symbol;Acc:VGNC:89343]
CvsSt	ENSSSCG00000016450	1314.06	3.62487	0.720335	5.03219	4.84896e-07	1.0094e-05	397557	NOS3	nitric oxide synthase 3 [Source:NCBI gene (formerly Entrezgene);Acc:397557]
CvsSt	ENSSSCG00000016469	136.153	3.27531	0.675696	4.84732	1.25141e-06	2.23921e-05	100171400	TRPV5	transient receptor potential cation channel subfamily V member 5 [Source:HGNC Symbol;Acc:HGNC:3145]
CvsSt	ENSSSCG00000016513	66.2849	2.2834	0.629983	3.62454	0.000289481	0.00199123	100519232	KIAA1549	KIAA1549 [Source:VGNC Symbol;Acc:VGNC:99719]
CvsSt	ENSSSCG00000016516	6.87815	3.29487	1.20292	2.73907	0.0061614	0.0221752	100519402	ATP6V0A4	ATPase H+ transporting V0 subunit a4 [Source:VGNC Symbol;Acc:VGNC:85665]
CvsSt	ENSSSCG00000016521	32.2742	2.52563	0.852353	2.96313	0.00304527	0.0129165	100521167	DGKI	diacylglycerol kinase iota [Source:VGNC Symbol;Acc:VGNC:87274]
CvsSt	ENSSSCG00000016564	11717.4	2.55505	0.585021	4.36744	1.25711e-05	0.000150291	100626356	UBE2H	ubiquitin conjugating enzyme E2 H [Source:VGNC Symbol;Acc:VGNC:94643]
CvsSt	ENSSSCG00000016589	126.409	6.24384	0.975595	6.40003	1.55344e-10	8.71765e-09	100521592	LRRC4	leucine rich repeat containing 4 [Source:VGNC Symbol;Acc:VGNC:89839]
CvsSt	ENSSSCG00000016601	49.2915	6.9061	1.61715	4.27054	1.95e-05	0.000219577	397074	SPAM1	sperm adhesion molecule 1 [Source:VGNC Symbol;Acc:VGNC:93375]
CvsSt	ENSSSCG00000016605	24.1973	7.56112	1.64894	4.58546	4.52996e-06	6.49531e-05	100525195	LMOD2	leiomodin 2 [Source:VGNC Symbol;Acc:VGNC:89768]
CvsSt	ENSSSCG00000016606	27.4443	2.93463	0.742163	3.95416	7.68045e-05	0.000677886	100513190	ASB15	ankyrin repeat and SOCS box containing 15 [Source:VGNC Symbol;Acc:VGNC:97890]
CvsSt	ENSSSCG00000016625	4269.06	3.24048	0.442129	7.32927	2.31412e-13	2.34938e-11	100517505	CTTNBP2	cortactin binding protein 2 [Source:HGNC Symbol;Acc:HGNC:15679]
CvsSt	ENSSSCG00000016626	46.6894	3.39372	0.84673	4.00803	6.12284e-05	0.000561556	403154	CFTR	CF transmembrane conductance regulator [Source:VGNC Symbol;Acc:VGNC:97927]
CvsSt	ENSSSCG00000016652	17.6322	3.53116	0.954507	3.69946	0.000216062	0.00157343	100520161	LRRN3	leucine rich repeat neuronal 3 [Source:VGNC Symbol;Acc:VGNC:89862]
CvsSt	ENSSSCG00000016684	34.2636	4.80472	1.73893	2.76304	0.00572664	0.0209521	100513510	SCRN1	secernin 1 [Source:VGNC Symbol;Acc:VGNC:92647]
CvsSt	ENSSSCG00000016686	23.0782	2.81061	1.03354	2.71941	0.00653978	0.0232147	100513831	PRR15	proline rich 15 [Source:VGNC Symbol;Acc:VGNC:91854]
CvsSt	ENSSSCG00000016687	822.472	2.88944	0.635038	4.55003	5.36383e-06	7.47118e-05	100514933	ENSSSCG00000016687
CvsSt	ENSSSCG00000016726	47.362	8.71741	2.10616	4.139	3.4882e-05	0.000354896	100624934	ADCY1	adenylate cyclase 1 [Source:VGNC Symbol;Acc:VGNC:85105]
CvsSt	ENSSSCG00000016754	75.4853	2.78553	0.710508	3.92048	8.83738e-05	0.000758488	733628	AEBP1	AE binding protein 1 [Source:VGNC Symbol;Acc:VGNC:85162]
CvsSt	ENSSSCG00000016810	1453.46	2.06578	0.358818	5.75718	8.55311e-09	3.07539e-07	100525132	ENSSSCG00000016810
CvsSt	ENSSSCG00000016873	514.913	8.91198	1.18373	7.52872	5.1239e-14	5.93154e-12	100524404	NIM1K	NIM1 serine/threonine protein kinase [Source:VGNC Symbol;Acc:VGNC:90744]
CvsSt	ENSSSCG00000016923	317.94	4.42185	0.770534	5.73868	9.54176e-09	3.38599e-07	100522578	ACTBL2	actin beta like 2 [Source:VGNC Symbol;Acc:VGNC:85039]
CvsSt	ENSSSCG00000016941	362.079	2.42327	0.480101	5.04741	4.47841e-07	9.45746e-06	100526254	RNF180	ring finger protein 180 [Source:VGNC Symbol;Acc:VGNC:92370]
CvsSt	ENSSSCG00000016956	9082.6	2.61064	0.700348	3.72764	0.000193282	0.00143451	100514689	MAST4	microtubule associated serine/threonine kinase family member 4 [Source:VGNC Symbol;Acc:VGNC:90037]
CvsSt	ENSSSCG00000016976	7.75521	3.08456	1.23044	2.50687	0.0121804	0.0377805	100519576	ZNF366	zinc finger protein 366 [Source:VGNC Symbol;Acc:VGNC:95231]
CvsSt	ENSSSCG00000016983	87.7292	5.01852	1.20685	4.15837	3.20522e-05	0.000331795	100126236	STC2	stanniocalcin 2 [Source:VGNC Symbol;Acc:VGNC:93543]
CvsSt	ENSSSCG00000017018	1060.19	4.23311	0.692943	6.10888	1.00334e-09	4.60105e-08	100513121	TENM2	teneurin transmembrane protein 2 [Source:VGNC Symbol;Acc:VGNC:93872]
CvsSt	ENSSSCG00000017037	2.87672	4.72062	1.98185	2.38192	0.0172225	0.0490136	397423	FABP6	fatty acid binding protein 6 [Source:VGNC Symbol;Acc:VGNC:87872]
CvsSt	ENSSSCG00000017054	3430.87	3.23217	0.733661	4.40554	1.05521e-05	0.000130424	100523290	CYFIP2	cytoplasmic FMR1 interacting protein 2 [Source:VGNC Symbol;Acc:VGNC:87127]
CvsSt	ENSSSCG00000017061	8.95609	4.42647	1.62951	2.71644	0.00659882	0.0233816	100303721	ENSSSCG00000017061	hepatitis A virus cellular receptor 1 [Source:NCBI gene (formerly Entrezgene);Acc:100303721]
CvsSt	ENSSSCG00000017095	35.5153	2.00659	0.559522	3.58625	0.000335464	0.00224411	100737194	SEMA5A	semaphorin 5A [Source:VGNC Symbol;Acc:VGNC:92706]
CvsSt	ENSSSCG00000017101	50.5028	2.28335	0.63675	3.58595	0.000335849	0.00224416	100517503	ADCY2	adenylate cyclase 2 [Source:VGNC Symbol;Acc:VGNC:85106]
CvsSt	ENSSSCG00000017120	39.0645	7.08164	1.71791	4.12224	3.75208e-05	0.000377695	641346	SLC6A19	solute carrier family 6 member 19 [Source:VGNC Symbol;Acc:VGNC:93160]
CvsSt	ENSSSCG00000017160	1288.43	2.56966	0.563729	4.55833	5.15631e-06	7.22454e-05	100511584	CBX4	chromobox 4 [Source:VGNC Symbol;Acc:VGNC:86231]
CvsSt	ENSSSCG00000017215	61.5974	2.25984	0.580976	3.88973	0.000100354	0.00084865	100514790	SLC16A5	solute carrier family 16 member 5 [Source:VGNC Symbol;Acc:VGNC:92945]
CvsSt	ENSSSCG00000017219	455.297	6.22772	0.654293	9.51823	1.76147e-21	4.64464e-19	100736965	HID1	HID1 domain containing [Source:VGNC Symbol;Acc:VGNC:88879]
CvsSt	ENSSSCG00000017222	536.298	9.52327	1.16334	8.18613	2.69751e-16	4.37711e-14	100512069	OTOP2	otopetrin 2 [Source:VGNC Symbol;Acc:VGNC:91094]
CvsSt	ENSSSCG00000017223	23.283	7.63451	1.51755	5.03081	4.88413e-07	1.01378e-05	100512251	USH1G	USH1 protein network component sans [Source:VGNC Symbol;Acc:VGNC:94739]
CvsSt	ENSSSCG00000017226	1133.44	3.01625	0.602994	5.00213	5.67e-07	1.15252e-05	100513229	FADS6	fatty acid desaturase 6 [Source:VGNC Symbol;Acc:VGNC:87878]
CvsSt	ENSSSCG00000017256	15.888	2.25744	0.778202	2.90084	0.00372158	0.0150721	100520861	ABCA6	ATP binding cassette subfamily A member 6 [Source:VGNC Symbol;Acc:VGNC:84950]
CvsSt	ENSSSCG00000017258	72.9524	5.69881	1.04106	5.47404	4.39896e-08	1.26729e-06	100522273	FAM20A	FAM20A golgi associated secretory pathway pseudokinase [Source:VGNC Symbol;Acc:VGNC:87949]
CvsSt	ENSSSCG00000017260	3534.35	2.27903	0.597477	3.81442	0.000136505	0.00108161	100462758	WIPI1	WD repeat domain, phosphoinositide interacting 1 [Source:VGNC Symbol;Acc:VGNC:94959]
CvsSt	ENSSSCG00000017262	286.431	4.72039	0.668383	7.0624	1.6365e-12	1.50091e-10	100739042	SLC16A6	solute carrier family 16 member 6 [Source:VGNC Symbol;Acc:VGNC:92946]
CvsSt	ENSSSCG00000017265	430.153	5.73717	0.779215	7.36275	1.80155e-13	1.87926e-11	100739604	AXIN2	axin 2 [Source:VGNC Symbol;Acc:VGNC:85708]
CvsSt	ENSSSCG00000017282	6.60752	5.7685	1.66938	3.45546	0.000549345	0.00333098	100511715	SCN4A	sodium voltage-gated channel alpha subunit 4 [Source:VGNC Symbol;Acc:VGNC:92635]
CvsSt	ENSSSCG00000017300	727.718	2.22418	0.536388	4.14659	3.37461e-05	0.000345747	100516106	MRC2	mannose receptor C type 2 [Source:VGNC Symbol;Acc:VGNC:90341]
CvsSt	ENSSSCG00000017306	47.2493	2.52087	0.546692	4.61113	4.00489e-06	5.8758e-05	397063	ITGB3	integrin subunit beta 3 [Source:NCBI gene (formerly Entrezgene);Acc:397063]
CvsSt	ENSSSCG00000017313	9.50681	5.02067	1.56448	3.20917	0.00133119	0.00671151	397426	ENSSSCG00000017313	corticotropin releasing hormone receptor 1 [Source:VGNC Symbol;Acc:VGNC:98983]
CvsSt	ENSSSCG00000017317	1056.39	6.6361	0.86619	7.66125	1.84137e-14	2.37813e-12	100519512	WNT3	Wnt family member 3 [Source:VGNC Symbol;Acc:VGNC:94970]
CvsSt	ENSSSCG00000017320	17.9552	5.63782	1.72862	3.26146	0.00110841	0.00581304	100738728	RPRML	reprimo like [Source:VGNC Symbol;Acc:VGNC:92437]
CvsSt	ENSSSCG00000017358	16.9743	4.62433	1.19056	3.88416	0.000102683	0.000862587	100514249	SLC4A1	solute carrier family 4 member 1 [Source:VGNC Symbol;Acc:VGNC:99051]
CvsSt	ENSSSCG00000017419	9173.77	2.01756	0.503317	4.00852	6.11011e-05	0.00056066	100524895	DNAJC7	DnaJ heat shock protein family (Hsp40) member C7 [Source:VGNC Symbol;Acc:VGNC:98987]
CvsSt	ENSSSCG00000017422	176.367	3.47386	0.47305	7.34353	2.08032e-13	2.14646e-11	100511038	FKBP10	FKBP prolyl isomerase 10 [Source:VGNC Symbol;Acc:VGNC:88143]
CvsSt	ENSSSCG00000017429	226.306	2.00478	0.349328	5.73896	9.52614e-09	3.38599e-07	100526242	P3H4	prolyl 3-hydroxylase family member 4 (inactive) [Source:VGNC Symbol;Acc:VGNC:99025]
CvsSt	ENSSSCG00000017437	12293.6	11.2087	0.776676	14.4316	3.27364e-47	6.215e-44	100514315	KRT36	keratin 36 [Source:VGNC Symbol;Acc:VGNC:89589]
CvsSt	ENSSSCG00000017438	21459.4	9.04753	0.515614	17.5471	6.25922e-69	5.94156e-65	100514792	KRT35	keratin 35 [Source:VGNC Symbol;Acc:VGNC:89588]
CvsSt	ENSSSCG00000017439	3984.75	7.03036	0.684405	10.2722	9.40119e-25	3.21601e-22	100514599	KRT32	keratin 32 [Source:VGNC Symbol;Acc:VGNC:89587]
CvsSt	ENSSSCG00000017441	403801	11.1603	0.783343	14.2471	4.67532e-46	6.82776e-43	100514127	ENSSSCG00000017441
CvsSt	ENSSSCG00000017451	23183.1	10.8158	0.96373	11.2228	3.15083e-29	1.42425e-26
CvsSt	ENSSSCG00000017458	18253.9	11.8582	0.922542	12.8538	8.18778e-38	5.97865e-35	100523817	KRT39	keratin 39 [Source:VGNC Symbol;Acc:VGNC:89590]
CvsSt	ENSSSCG00000017461	1800.38	7.92705	0.999574	7.93043	2.18397e-15	3.18943e-13	100520694	KRT28	keratin 28 [Source:VGNC Symbol;Acc:VGNC:89585]
CvsSt	ENSSSCG00000017462	57843.8	8.42778	0.810935	10.3927	2.67754e-25	9.77561e-23	100521040	KRT27	keratin 27 [Source:VGNC Symbol;Acc:VGNC:98065]
CvsSt	ENSSSCG00000017463	752.462	5.45198	0.852797	6.39305	1.62607e-10	9.02658e-09	100523992	KRT26	keratin 26 [Source:VGNC Symbol;Acc:VGNC:98064]
CvsSt	ENSSSCG00000017464	181008	9.06922	0.832617	10.8924	1.25264e-27	5.05988e-25	100524337	KRT25	keratin 25 [Source:VGNC Symbol;Acc:VGNC:89584]
CvsSt	ENSSSCG00000017472	18.5162	7.08036	1.54218	4.59114	4.40834e-06	6.35477e-05	100144490	IGFBP4	insulin like growth factor binding protein 4 [Source:VGNC Symbol;Acc:VGNC:98045]
CvsSt	ENSSSCG00000017473	391.156	2.05892	0.540121	3.81197	0.000137866	0.00109149	396917	TOP2A	DNA topoisomerase II alpha [Source:VGNC Symbol;Acc:VGNC:94310]
CvsSt	ENSSSCG00000017507	55.6353	2.3214	0.538884	4.30779	1.64892e-05	0.000190539	100517731	ENSSSCG00000017507
CvsSt	ENSSSCG00000017515	48.47	2.35494	0.666728	3.53209	0.000412292	0.00264585	100518628	TBKBP1	TBK1 binding protein 1 [Source:VGNC Symbol;Acc:VGNC:93788]
CvsSt	ENSSSCG00000017522	2817.95	5.39235	0.546864	9.86049	6.17484e-23	1.83171e-20	100519513	SP6	Sp6 transcription factor [Source:VGNC Symbol;Acc:VGNC:93363]
CvsSt	ENSSSCG00000017556	67.2802	8.94942	2.06619	4.33137	1.48183e-05	0.00017398	100626580	ANKRD40CL	ANKRD40 C-terminal like [Source:HGNC Symbol;Acc:HGNC:26080]
CvsSt	ENSSSCG00000017563	13.5855	2.92618	1.11598	2.62208	0.00873951	0.0292009	100513622	MYCBPAP	MYCBP associated protein [Source:VGNC Symbol;Acc:VGNC:90503]
CvsSt	ENSSSCG00000017589	6125.38	5.46957	0.757891	7.21683	5.32147e-13	5.12833e-11	100516335	DLX3	distal-less homeobox 3 [Source:VGNC Symbol;Acc:VGNC:87339]
CvsSt	ENSSSCG00000017643	988.514	3.00937	0.761206	3.95343	7.70402e-05	0.000679335	100515575	ENSSSCG00000017643	septin 4 [Source:VGNC Symbol;Acc:VGNC:99040]
CvsSt	ENSSSCG00000017694	2033.7	2.06442	0.490932	4.20511	2.60958e-05	0.000279058	397324	ACACA	acetyl-CoA carboxylase alpha [Source:VGNC Symbol;Acc:VGNC:84997]
CvsSt	ENSSSCG00000017762	6242.06	7.66576	0.83526	9.1777	4.40409e-20	1.00737e-17	100625164	FOXN1	forkhead box N1 [Source:VGNC Symbol;Acc:VGNC:88218]
CvsSt	ENSSSCG00000017763	1097.3	4.31152	0.741516	5.81447	6.08277e-09	2.27125e-07	100512737	SLC13A2	solute carrier family 13 member 2 [Source:VGNC Symbol;Acc:VGNC:92930]
CvsSt	ENSSSCG00000017798	6.8609	3.33954	1.20912	2.76195	0.00574569	0.0210137	100521401	TMIGD1	transmembrane and immunoglobulin domain containing 1 [Source:VGNC Symbol;Acc:VGNC:94224]
CvsSt	ENSSSCG00000017801	3.95461	4.60698	1.69367	2.72011	0.006526	0.0231906
CvsSt	ENSSSCG00000017818	155.279	5.64862	1.39416	4.05164	5.086e-05	0.000484242	780402	SERPINF1	serpin family F member 1 [Source:VGNC Symbol;Acc:VGNC:92743]
CvsSt	ENSSSCG00000017861	2193.64	3.05399	0.577709	5.28637	1.24765e-07	3.14564e-06	100142661	ASPA	aspartoacylase [Source:VGNC Symbol;Acc:VGNC:85582]
CvsSt	ENSSSCG00000017862	6049.72	3.99895	0.575722	6.94598	3.75843e-12	3.11588e-10	100515051	TRPV3	transient receptor potential cation channel subfamily V member 3 [Source:VGNC Symbol;Acc:VGNC:94475]
CvsSt	ENSSSCG00000017865	2136.57	2.31411	0.602755	3.83922	0.000123424	0.000998384	100515235	CTNS	cystinosin, lysosomal cystine transporter [Source:VGNC Symbol;Acc:VGNC:87069]
CvsSt	ENSSSCG00000017873	1031.12	2.45458	0.482819	5.08386	3.69832e-07	8.01011e-06	503667	CAMKK1	calcium/calmodulin dependent protein kinase kinase 1 [Source:VGNC Symbol;Acc:VGNC:98977]
CvsSt	ENSSSCG00000017888	10.0628	2.76571	1.08873	2.5403	0.0110756	0.0350627	100520976	SLC13A5	solute carrier family 13 member 5 [Source:VGNC Symbol;Acc:VGNC:92932]
CvsSt	ENSSSCG00000017893	32.2474	3.88029	0.944724	4.10732	4.00268e-05	0.000398693	100521819	PIMREG	PICALM interacting mitotic regulator [Source:VGNC Symbol;Acc:VGNC:91451]
CvsSt	ENSSSCG00000017894	22.8141	7.48774	1.66034	4.50977	6.48968e-06	8.74095e-05	100522103	WSCD1	WSC domain containing 1 [Source:VGNC Symbol;Acc:VGNC:94983]
CvsSt	ENSSSCG00000017923	423.831	2.50688	0.53918	4.64944	3.32834e-06	5.04298e-05	100620614	ALOX15	arachidonate 15-lipoxygenase [Source:NCBI gene (formerly Entrezgene);Acc:396971]
CvsSt	ENSSSCG00000017926	30.2166	2.20703	0.612725	3.60199	0.000315785	0.00213903	100517000	SLC16A13	solute carrier family 16 member 13 [Source:VGNC Symbol;Acc:VGNC:92941]
CvsSt	ENSSSCG00000017943	175.142	2.36633	0.436314	5.42345	5.84593e-08	1.60848e-06	100623422	ACAP1	ArfGAP with coiled-coil, ankyrin repeat and PH domains 1 [Source:VGNC Symbol;Acc:VGNC:85001]
CvsSt	ENSSSCG00000017947	4797.7	2.86062	0.593683	4.81843	1.44695e-06	2.52254e-05	100520636	ACADVL	acyl-CoA dehydrogenase very long chain [Source:VGNC Symbol;Acc:VGNC:97864]
CvsSt	ENSSSCG00000017948	105.182	3.64351	0.583095	6.24858	4.14207e-10	2.0694e-08	100135672	EFNB3	ephrin B3 [Source:VGNC Symbol;Acc:VGNC:87578]
CvsSt	ENSSSCG00000017951	25.5726	4.31435	1.13198	3.81134	0.000138214	0.00109379	100522212	ATP1B2	ATPase Na+/K+ transporting subunit beta 2 [Source:VGNC Symbol;Acc:VGNC:85643]
CvsSt	ENSSSCG00000017963	140.933	2.84977	0.560703	5.08249	3.72522e-07	8.05505e-06
CvsSt	ENSSSCG00000017978	2125.74	7.45699	1.00059	7.45256	9.15448e-14	1.01636e-11	100525835	ALOX15B	arachidonate 15-lipoxygenase type B [Source:VGNC Symbol;Acc:VGNC:98972]
CvsSt	ENSSSCG00000017985	52.9963	7.41818	1.6046	4.62308	3.78077e-06	5.5989e-05	100621152	RNF222	ring finger protein 222 [Source:VGNC Symbol;Acc:VGNC:92384]
CvsSt	ENSSSCG00000018032	79.6583	2.21101	0.784831	2.81717	0.00484482	0.018432	100523638	TRPV2	transient receptor potential cation channel subfamily V member 2 [Source:VGNC Symbol;Acc:VGNC:94474]
CvsSt	ENSSSCG00000018050	43.9992	2.89127	0.726631	3.97901	6.92027e-05	0.000620601	100511593	ENSSSCG00000018050	GRB2 related adaptor protein [Source:VGNC Symbol;Acc:VGNC:99000]
CvsSt	ENSSSCG00000018197	7.19409	2.09453	0.737668	2.83939	0.00451999	0.0174628
CvsSt	ENSSSCG00000018303	29.6938	2.53379	0.919274	2.7563	0.00584602	0.0212781
CvsSt	ENSSSCG00000018359	10.93	2.35823	0.703366	3.35278	0.000800052	0.00446735	100526406	ssc-mir-421	ssc-mir-421 [Source:miRBase;Acc:MI0015925]
CvsSt	ENSSSCG00000018708	8.43396	3.08989	1.20343	2.56757	0.0102414	0.0330103
CvsSt	ENSSSCG00000019255	11.0028	2.09482	0.757965	2.76375	0.00571416	0.0209225	100498773	MIR374B	microRNA mir-374b [Source:NCBI gene (formerly Entrezgene);Acc:100498773]
CvsSt	ENSSSCG00000019643	24.8776	5.22932	1.85208	2.82348	0.00475052	0.0181356
CvsSt	ENSSSCG00000019939	3.46181	4.18701	1.63173	2.56599	0.0102881	0.0331004
CvsSt	ENSSSCG00000020666	2038.8	3.46459	0.626677	5.52851	3.22961e-08	9.7634e-07	100738234	EHD4	EH domain containing 4 [Source:VGNC Symbol;Acc:VGNC:87598]
CvsSt	ENSSSCG00000020673	466.224	9.57717	1.38576	6.91113	4.808e-12	3.91759e-10	100518807	ENSSSCG00000020673
CvsSt	ENSSSCG00000020675	54.7023	2.76574	0.614517	4.50067	6.77408e-06	9.01865e-05	100520369	ATF7IP2	activating transcription factor 7 interacting protein 2 [Source:VGNC Symbol;Acc:VGNC:85612]
CvsSt	ENSSSCG00000020680	3.5806	4.75811	1.80938	2.62968	0.00854642	0.0287226	100302017	CLDN14	claudin 14 [Source:VGNC Symbol;Acc:VGNC:86731]
CvsSt	ENSSSCG00000020720	5.74525	4.54056	1.5969	2.84336	0.00446407	0.0173066	100739522	IRAG1	inositol 1,4,5-triphosphate receptor associated 1 [Source:VGNC Symbol;Acc:VGNC:98801]
CvsSt	ENSSSCG00000020740	31166.6	10.8138	0.73368	14.7391	3.61671e-49	9.80903e-46	100626137	DSG4	desmoglein 4 [Source:VGNC Symbol;Acc:VGNC:87458]
CvsSt	ENSSSCG00000020777	2047.91	2.75956	0.693169	3.98108	6.86033e-05	0.000616099	100516320	TRIOBP	TRIO and F-actin binding protein [Source:HGNC Symbol;Acc:HGNC:17009]
CvsSt	ENSSSCG00000020838	5542.82	10.0831	1.95489	5.15788	2.49767e-07	5.74072e-06	100621639	ENSSSCG00000020838
CvsSt	ENSSSCG00000020856	5034.83	3.08785	0.719753	4.29015	1.78555e-05	0.000204332	100624455	PPME1	protein phosphatase methylesterase 1 [Source:VGNC Symbol;Acc:VGNC:91713]
CvsSt	ENSSSCG00000020988	101.925	2.23664	0.71625	3.12271	0.00179196	0.00850086	106510560	ENSSSCG00000020988	zinc finger protein 114 [Source:VGNC Symbol;Acc:VGNC:98749]
CvsSt	ENSSSCG00000021026	476.391	3.15779	0.354628	8.90452	5.36173e-19	1.0387e-16	100626319	TMEM51	transmembrane protein 51 [Source:VGNC Symbol;Acc:VGNC:94187]
CvsSt	ENSSSCG00000021059	19.9808	2.92995	1.20398	2.43355	0.0149518	0.0441804	606743	ADORA1	adenosine A1 receptor [Source:VGNC Symbol;Acc:VGNC:85147]
CvsSt	ENSSSCG00000021067	246.146	2.73159	0.610659	4.47318	7.70641e-06	0.000100416	100625219	BLVRB	biliverdin reductase B [Source:VGNC Symbol;Acc:VGNC:85834]
CvsSt	ENSSSCG00000021072	1113.09	2.66992	0.549151	4.86191	1.16259e-06	2.11011e-05	100518639	EPG5	ectopic P-granules autophagy [Source:VGNC Symbol;Acc:VGNC:87728]
CvsSt	ENSSSCG00000021082	691.863	7.42366	0.934802	7.94142	1.99879e-15	2.94163e-13	100625643	NRG2	neuregulin 2 [Source:VGNC Symbol;Acc:VGNC:98160]
CvsSt	ENSSSCG00000021132	12.9241	6.61568	1.64909	4.01172	6.02771e-05	0.000553634	100622421	PLD5	phospholipase D family member 5 [Source:VGNC Symbol;Acc:VGNC:96145]
CvsSt	ENSSSCG00000021220	1190.36	7.58907	0.864752	8.776	1.69395e-18	3.09227e-16	100627332	CKB	creatine kinase B [Source:VGNC Symbol;Acc:VGNC:86718]
CvsSt	ENSSSCG00000021236	449.561	2.25754	0.463512	4.87051	1.1131e-06	2.03194e-05	100737254	ENSSSCG00000021236
CvsSt	ENSSSCG00000021241	10.9425	3.04496	0.870715	3.49708	0.000470379	0.00294239	100627950	ADAMTS13	ADAM metallopeptidase with thrombospondin type 1 motif 13 [Source:VGNC Symbol;Acc:VGNC:85075]
CvsSt	ENSSSCG00000021255	54.6329	3.16575	0.81403	3.88898	0.000100667	0.000850161	100625920	ADA	adenosine deaminase [Source:VGNC Symbol;Acc:VGNC:95889]
CvsSt	ENSSSCG00000021259	478.946	4.57229	0.898898	5.08655	3.64629e-07	7.93864e-06	100515954	CDA	cytidine deaminase [Source:VGNC Symbol;Acc:VGNC:86439]
CvsSt	ENSSSCG00000021337	31.0723	7.84514	1.67909	4.67226	2.979e-06	4.58324e-05	397487	PRM1	protamine 1 [Source:NCBI gene (formerly Entrezgene);Acc:397487]
CvsSt	ENSSSCG00000021363	5037.38	2.02302	0.528838	3.8254	0.00013056	0.00104472	100188906	CHD3	chromodomain helicase DNA binding protein 3 [Source:VGNC Symbol;Acc:VGNC:86631]
CvsSt	ENSSSCG00000021411	220.067	4.67298	0.774375	6.03452	1.59439e-09	6.86384e-08	100157327	HIST1H2BD	histone cluster 1, H2bd [Source:NCBI gene (formerly Entrezgene);Acc:100157327]
CvsSt	ENSSSCG00000021440	3636.65	2.41673	0.469719	5.14506	2.67438e-07	6.08791e-06	100518248	GPSM2	G protein signaling modulator 2 [Source:VGNC Symbol;Acc:VGNC:88649]
CvsSt	ENSSSCG00000021453	17.4249	5.54645	1.62813	3.40665	0.000657664	0.00385363	100739310	RIMS4	regulating synaptic membrane exocytosis 4 [Source:VGNC Symbol;Acc:VGNC:95775]
CvsSt	ENSSSCG00000021598	43.4956	2.14174	0.703735	3.04339	0.00233925	0.0104594	100628171	EVA1C	eva-1 homolog C [Source:VGNC Symbol;Acc:VGNC:87817]
CvsSt	ENSSSCG00000021657	24.6826	5.12064	1.2656	4.04602	5.20951e-05	0.000492297	102160784	SATB2	SATB homeobox 2 [Source:VGNC Symbol;Acc:VGNC:95972]
CvsSt	ENSSSCG00000021668	219609	11.184	0.786371	14.2223	6.65863e-46	9.02958e-43	100513946	KRT31	keratin 31 [Source:NCBI gene (formerly Entrezgene);Acc:100513946]
CvsSt	ENSSSCG00000021706	467.08	3.55914	0.904118	3.93659	8.2647e-05	0.000718482	100622057	KIF21B	kinesin family member 21B [Source:VGNC Symbol;Acc:VGNC:96219]
CvsSt	ENSSSCG00000021728	8.93984	5.97632	1.61401	3.70279	0.000213245	0.00155742	100217393	LGALS2	galectin 2 [Source:VGNC Symbol;Acc:VGNC:89693]
CvsSt	ENSSSCG00000021755	330191	11.0081	0.709191	15.5221	2.46015e-54	1.55686e-50	100516036	ENSSSCG00000021755
CvsSt	ENSSSCG00000021803	7684.14	2.92292	0.664078	4.40147	1.07522e-05	0.000132295	100520613	RANBP10	RAN binding protein 10 [Source:VGNC Symbol;Acc:VGNC:92077]
CvsSt	ENSSSCG00000021804	3434.75	10.6057	1.03109	10.2859	8.157e-25	2.86779e-22	100624898	KRTAP24-1	keratin associated protein 24-1 [Source:VGNC Symbol;Acc:VGNC:89601]
CvsSt	ENSSSCG00000021813	6.89493	4.07653	1.534	2.65745	0.00787348	0.026933	100170644	SLC26A3	solute carrier family 26 member 3 [Source:VGNC Symbol;Acc:VGNC:93028]
CvsSt	ENSSSCG00000021846	9.09886	6.04181	1.77271	3.40823	0.000653849	0.00383719	100622362	EFHC2	EF-hand domain containing 2 [Source:VGNC Symbol;Acc:VGNC:87571]
CvsSt	ENSSSCG00000021902	4073.42	2.4545	0.774009	3.17115	0.00151835	0.00749113	100525792	GABRP	gamma-aminobutyric acid type A receptor subunit pi [Source:VGNC Symbol;Acc:VGNC:88314]
CvsSt	ENSSSCG00000021906	416.12	6.7538	1.04911	6.43766	1.21328e-10	7.06566e-09	100521541	SYT7	synaptotagmin 7 [Source:VGNC Symbol;Acc:VGNC:100868]
CvsSt	ENSSSCG00000021911	512.51	3.81721	0.892172	4.27856	1.88104e-05	0.000213645	100513927	NDRG4	NDRG family member 4 [Source:VGNC Symbol;Acc:VGNC:90633]
CvsSt	ENSSSCG00000022009	3.24456	4.95437	2.06545	2.39869	0.0164537	0.0474633	396857	DDC	dopa decarboxylase [Source:VGNC Symbol;Acc:VGNC:87204]
CvsSt	ENSSSCG00000022017	526.036	2.45742	0.671581	3.65916	0.000253045	0.00178656	397041	LGALS4	galectin 4 [Source:VGNC Symbol;Acc:VGNC:89696]
CvsSt	ENSSSCG00000022026	59.4967	5.14026	1.11122	4.6258	3.73162e-06	5.53043e-05	100524458	AIPL1	aryl hydrocarbon receptor interacting protein like 1 [Source:VGNC Symbol;Acc:VGNC:85205]
CvsSt	ENSSSCG00000022029	807.417	2.10247	0.614048	3.42395	0.000617171	0.00366844	100627043	RAP1GAP	RAP1 GTPase activating protein [Source:VGNC Symbol;Acc:VGNC:92085]
CvsSt	ENSSSCG00000022031	52.8952	3.69787	0.64571	5.72683	1.02326e-08	3.57764e-07	100626514	CHST2	carbohydrate sulfotransferase 2 [Source:VGNC Symbol;Acc:VGNC:86678]
CvsSt	ENSSSCG00000022081	895.498	2.17037	0.365421	5.93937	2.86126e-09	1.14844e-07	100518335	PHLDB2	pleckstrin homology like domain family B member 2 [Source:VGNC Symbol;Acc:VGNC:91399]
CvsSt	ENSSSCG00000022091	42.9334	4.50642	1.02674	4.38905	1.13849e-05	0.000138908	100525800	SLITRK4	SLIT and NTRK like family member 4 [Source:VGNC Symbol;Acc:VGNC:93209]
CvsSt	ENSSSCG00000022099	53845.4	3.7075	0.788551	4.70166	2.58053e-06	4.07922e-05	100152247	TP53INP2	tumor protein p53 inducible nuclear protein 2 [Source:VGNC Symbol;Acc:VGNC:95737]
CvsSt	ENSSSCG00000022149	46.0356	3.38436	0.82405	4.10698	4.00863e-05	0.000399077	100518832	RMI2	RecQ mediated genome instability 2 [Source:VGNC Symbol;Acc:VGNC:92334]
CvsSt	ENSSSCG00000022162	1202.05	3.24486	0.673641	4.8169	1.45807e-06	2.53725e-05	100622743	RAB11FIP5	RAB11 family interacting protein 5 [Source:HGNC Symbol;Acc:HGNC:24845]
CvsSt	ENSSSCG00000022200	303.828	8.65717	1.28269	6.7492	1.48661e-11	1.0908e-09	100513981	SYT17	synaptotagmin 17 [Source:HGNC Symbol;Acc:HGNC:24119]
CvsSt	ENSSSCG00000022247	556.808	2.76054	0.479801	5.75351	8.74087e-09	3.13696e-07	100627913	PROSER2	proline and serine rich 2 [Source:VGNC Symbol;Acc:VGNC:96019]
CvsSt	ENSSSCG00000022296	176.898	2.15434	0.698032	3.08631	0.00202659	0.00936352	100513315	CDK15	cyclin dependent kinase 15 [Source:VGNC Symbol;Acc:VGNC:95614]
CvsSt	ENSSSCG00000022347	94.0517	8.19105	1.60674	5.09795	3.4336e-07	7.53605e-06	100521912	WNT11	Wnt family member 11 [Source:VGNC Symbol;Acc:VGNC:94966]
CvsSt	ENSSSCG00000022372	2172.4	2.13342	0.564992	3.77602	0.000159351	0.0012263	431671	SLC6A14	solute carrier family 6 member 14 [Source:NCBI gene (formerly Entrezgene);Acc:431671]
CvsSt	ENSSSCG00000022383	3.20835	4.62168	1.73589	2.66243	0.00775796	0.026639	397555	GATA4	GATA binding protein 4 [Source:VGNC Symbol;Acc:VGNC:88365]
CvsSt	ENSSSCG00000022391	14.8036	2.7929	1.07767	2.59161	0.00955266	0.0312254
CvsSt	ENSSSCG00000022404	1890.81	2.0966	0.487601	4.29982	1.70935e-05	0.000197038	100144589	SLC3A2	solute carrier family 3 member 2 [Source:VGNC Symbol;Acc:VGNC:93112]
CvsSt	ENSSSCG00000022417	33.1093	3.08484	0.777317	3.96857	7.23055e-05	0.000642808	397002	HNF1B	HNF1 homeobox B [Source:NCBI gene (formerly Entrezgene);Acc:397002]
CvsSt	ENSSSCG00000022490	5.04334	5.27536	1.67121	3.15662	0.00159611	0.00779176	100513220	GPR83	G protein-coupled receptor 83 [Source:VGNC Symbol;Acc:VGNC:88637]
CvsSt	ENSSSCG00000022492	2180.36	3.17812	0.6006	5.29158	1.21267e-07	3.07377e-06	100620914	AMPD3	adenosine monophosphate deaminase 3 [Source:VGNC Symbol;Acc:VGNC:85288]
CvsSt	ENSSSCG00000022506	41.2912	4.54002	0.947089	4.79365	1.6377e-06	2.7935e-05	100623720	COL6A1	collagen type VI alpha 1 chain [Source:HGNC Symbol;Acc:HGNC:2211]
CvsSt	ENSSSCG00000022538	1317.82	2.17709	0.39679	5.48677	4.09346e-08	1.18944e-06	100624209	MARK4	microtubule affinity regulating kinase 4 [Source:VGNC Symbol;Acc:VGNC:90027]
CvsSt	ENSSSCG00000022543	7.09729	4.15828	1.66604	2.49591	0.0125634	0.0386511	100512803	VWDE	von Willebrand factor D and EGF domains [Source:HGNC Symbol;Acc:HGNC:21897]
CvsSt	ENSSSCG00000022554	158.593	4.23406	1.18712	3.56667	0.000361548	0.00238333	100624277	MATN1	matrilin 1 [Source:VGNC Symbol;Acc:VGNC:90042]
CvsSt	ENSSSCG00000022569	6.99667	4.48497	1.76509	2.54093	0.0110558	0.0350175	100623647	GRIA1	glutamate ionotropic receptor AMPA type subunit 1 [Source:VGNC Symbol;Acc:VGNC:88670]
CvsSt	ENSSSCG00000022649	909.063	3.49897	0.703988	4.97021	6.68787e-07	1.3226e-05	100623148	SLC7A11	solute carrier family 7 member 11 [Source:VGNC Symbol;Acc:VGNC:93171]
CvsSt	ENSSSCG00000022657	29409	11.6795	0.908573	12.8547	8.09171e-38	5.97865e-35	100523123	ENSSSCG00000022657
CvsSt	ENSSSCG00000022721	56.4382	2.76318	0.547085	5.05074	4.40097e-07	9.30428e-06	100623412	CDH16	cadherin 16 [Source:VGNC Symbol;Acc:VGNC:86479]
CvsSt	ENSSSCG00000022742	49853.9	4.6944	0.693363	6.77048	1.28355e-11	9.59381e-10	399538	PRDX6	peroxiredoxin 6 [Source:VGNC Symbol;Acc:VGNC:91785]
CvsSt	ENSSSCG00000022895	12271.6	4.92291	0.733822	6.70859	1.96511e-11	1.41854e-09	100624348	CRYBG3	crystallin beta-gamma domain containing 3 [Source:VGNC Symbol;Acc:VGNC:87020]
CvsSt	ENSSSCG00000022933	29.0108	4.49239	1.02537	4.38125	1.18002e-05	0.000143148	100621843	EFR3B	EFR3 homolog B [Source:VGNC Symbol;Acc:VGNC:87580]
CvsSt	ENSSSCG00000022945	134.639	4.30212	0.563891	7.62935	2.35934e-14	2.97335e-12	396637	UCHL1	ubiquitin C-terminal hydrolase L1 [Source:VGNC Symbol;Acc:VGNC:94680]
CvsSt	ENSSSCG00000022951	41.7814	3.91413	1.06486	3.67574	0.000237162	0.00169459	100626921	NFASC	neurofascin [Source:VGNC Symbol;Acc:VGNC:90707]
CvsSt	ENSSSCG00000022998	74.5985	3.29706	0.688686	4.78746	1.68905e-06	2.87077e-05	397661	PKIG	cAMP-dependent protein kinase inhibitor gamma [Source:VGNC Symbol;Acc:VGNC:96486]
CvsSt	ENSSSCG00000023048	6.29768	2.86022	1.17741	2.42925	0.0151301	0.044631
CvsSt	ENSSSCG00000023086	10.1445	2.47674	0.889485	2.78447	0.00536157	0.0199158
CvsSt	ENSSSCG00000023155	695.767	2.42024	0.543262	4.45502	8.38852e-06	0.000107824	100624678	CLN8	CLN8 transmembrane ER and ERGIC protein [Source:VGNC Symbol;Acc:VGNC:103067]
CvsSt	ENSSSCG00000023162	387.869	3.33113	0.639828	5.20629	1.9265e-07	4.60637e-06	100187727	CDH3	cadherin 3 [Source:VGNC Symbol;Acc:VGNC:96941]
CvsSt	ENSSSCG00000023169	6.93005	2.03592	0.848717	2.39882	0.0164478	0.0474612	100519048	CA10	carbonic anhydrase 10 [Source:VGNC Symbol;Acc:VGNC:86096]
CvsSt	ENSSSCG00000023171	733.905	2.18167	0.476108	4.5823	4.59885e-06	6.57448e-05	100152541	SLC66A2	solute carrier family 66 member 2 [Source:VGNC Symbol;Acc:VGNC:93151]
CvsSt	ENSSSCG00000023178	14.502	2.69391	0.873143	3.0853	0.00203344	0.00938886	100515875	BATF2	basic leucine zipper ATF-like transcription factor 2 [Source:VGNC Symbol;Acc:VGNC:85759]
CvsSt	ENSSSCG00000023181	798.107	6.30453	0.895894	7.03714	1.96229e-12	1.7825e-10	100620752	ZNF385B	zinc finger protein 385B [Source:VGNC Symbol;Acc:VGNC:98425]
CvsSt	ENSSSCG00000023186	5.11918	4.95734	1.63679	3.02871	0.00245602	0.0109076	100511956	CA4	carbonic anhydrase 4 [Source:VGNC Symbol;Acc:VGNC:86100]
CvsSt	ENSSSCG00000023187	1370.53	3.26482	0.527869	6.1849	6.21411e-10	2.95677e-08	100151826	VAV3	vav guanine nucleotide exchange factor 3 [Source:HGNC Symbol;Acc:HGNC:12659]
CvsSt	ENSSSCG00000023191	1294.99	2.02871	0.555145	3.65437	0.000257813	0.00181617	100621493	LYPLA2	lysophospholipase 2 [Source:VGNC Symbol;Acc:VGNC:89914]
CvsSt	ENSSSCG00000023215	12.346	6.01761	1.73476	3.46885	0.0005227	0.00319861	414909	MAOB	monoamine oxidase B [Source:VGNC Symbol;Acc:VGNC:89976]
CvsSt	ENSSSCG00000023305	36.0687	3.58729	1.2432	2.88553	0.00390756	0.0156047
CvsSt	ENSSSCG00000023495	10423.2	2.31327	0.567407	4.07692	4.56358e-05	0.000442716	100620706	PITHD1	PITH domain containing 1 [Source:VGNC Symbol;Acc:VGNC:91463]
CvsSt	ENSSSCG00000023520	62.1055	2.77505	0.80742	3.43693	0.000588338	0.00352386	100519237	PCSK5	proprotein convertase subtilisin/kexin type 5 [Source:VGNC Symbol;Acc:VGNC:103147]
CvsSt	ENSSSCG00000023604	42603.8	5.21171	0.565454	9.21686	3.05923e-20	7.17031e-18	100739583	LAP3	leucine aminopeptidase 3 [Source:VGNC Symbol;Acc:VGNC:89635]
CvsSt	ENSSSCG00000023627	1830.05	3.63046	0.447135	8.11938	4.68578e-16	7.4133e-14	100521871	ENSSSCG00000023627
CvsSt	ENSSSCG00000023630	1724.36	3.42391	0.658176	5.20212	1.97029e-07	4.69543e-06	100628221	CPM	carboxypeptidase M [Source:VGNC Symbol;Acc:VGNC:86947]
CvsSt	ENSSSCG00000023684	163.277	2.35688	0.449233	5.24645	1.55061e-07	3.77551e-06	397417	MT1A	metallothionein 1A [Source:NCBI gene (formerly Entrezgene);Acc:397417]
CvsSt	ENSSSCG00000023749	31.959	3.11505	0.936015	3.32799	0.000874755	0.00480394	397189	ENSSSCG00000023749	myo-inositol oxygenase [Source:NCBI gene (formerly Entrezgene);Acc:397189]
CvsSt	ENSSSCG00000023788	10969.5	11.0885	0.847662	13.0812	4.21485e-39	3.47908e-36	100623817	ENSSSCG00000023788	TBC1 domain family member 30 [Source:VGNC Symbol;Acc:VGNC:93775]
CvsSt	ENSSSCG00000023890	1232.32	2.24341	0.746978	3.00331	0.00267062	0.0116315	100462717	ATG2A	autophagy related 2A [Source:VGNC Symbol;Acc:VGNC:85619]
CvsSt	ENSSSCG00000023987	3.12008	4.36804	1.68442	2.5932	0.0095087	0.0311085	100522849	ENSSSCG00000023987
CvsSt	ENSSSCG00000024009	516.241	5.68361	0.752763	7.55033	4.34153e-14	5.1195e-12	100515264	ENSSSCG00000024009	calcium/calmodulin dependent protein kinase II inhibitor 1 [Source:VGNC Symbol;Acc:VGNC:96935]
CvsSt	ENSSSCG00000024015	43.1072	2.65931	0.904706	2.93942	0.00328825	0.0137022	444995	FADS1	fatty acid desaturase 1 [Source:VGNC Symbol;Acc:VGNC:87875]
CvsSt	ENSSSCG00000024021	243.356	3.43776	0.301812	11.3904	4.66976e-30	2.27322e-27	102164731	ENSSSCG00000024021
CvsSt	ENSSSCG00000024060	103.598	2.01019	0.649643	3.0943	0.0019728	0.00917529	100739011	LIPT2	lipoyl(octanoyl) transferase 2 [Source:HGNC Symbol;Acc:HGNC:37216]
CvsSt	ENSSSCG00000024145	22.8593	2.15961	0.643938	3.35375	0.00079724	0.00446194	100624544	PRR11	proline rich 11 [Source:VGNC Symbol;Acc:VGNC:91850]
CvsSt	ENSSSCG00000024179	17.246	3.76051	1.15965	3.24281	0.00118357	0.00612821	100048960	NAGS	N-acetylglutamate synthase [Source:VGNC Symbol;Acc:VGNC:90571]
CvsSt	ENSSSCG00000024268	9.25984	4.45237	1.57456	2.82769	0.00468847	0.0179602
CvsSt	ENSSSCG00000024285	65.2785	3.27388	0.625939	5.23035	1.69192e-07	4.08665e-06	100626077	DLG4	discs large MAGUK scaffold protein 4 [Source:VGNC Symbol;Acc:VGNC:87328]
CvsSt	ENSSSCG00000024293	46.9304	3.58515	0.636327	5.63412	1.7595e-08	5.72682e-07	100738444	TMEM178A	transmembrane protein 178A [Source:VGNC Symbol;Acc:VGNC:94114]
CvsSt	ENSSSCG00000024305	60.5193	2.06399	0.484816	4.25727	2.06939e-05	0.000229885	397123	MT3	metallothionein 3 [Source:NCBI gene (formerly Entrezgene);Acc:397123]
CvsSt	ENSSSCG00000024325	38.2487	6.23577	1.71314	3.63995	0.000272688	0.00189772	100157757	SGK2	serum/glucocorticoid regulated kinase 2 [Source:VGNC Symbol;Acc:VGNC:95597]
CvsSt	ENSSSCG00000024403	189.869	3.24466	0.568885	5.70355	1.17339e-08	3.99943e-07	100144520	PRRT1	proline rich transmembrane protein 1 [Source:VGNC Symbol;Acc:VGNC:91871]
CvsSt	ENSSSCG00000024417	5.27693	4.81772	1.86155	2.58801	0.00965329	0.0314947	100627254	ERC2	ELKS/RAB6-interacting/CAST family member 2 [Source:VGNC Symbol;Acc:VGNC:87762]
CvsSt	ENSSSCG00000024431	6171.16	4.65904	0.739077	6.30386	2.90321e-10	1.51839e-08	100462720	ATG9B	autophagy related 9B [Source:VGNC Symbol;Acc:VGNC:85626]
CvsSt	ENSSSCG00000024444	537.094	2.40239	0.533882	4.49985	6.80007e-06	9.04691e-05	100621580	DDX59	DEAD-box helicase 59 [Source:VGNC Symbol;Acc:VGNC:96077]
CvsSt	ENSSSCG00000024474	119.647	10.0715	1.70142	5.91945	3.23023e-09	1.27762e-07	100525573	ENSSSCG00000024474
CvsSt	ENSSSCG00000024481	733.573	3.56553	0.831487	4.28814	1.80177e-05	0.00020594	100624559	PDE4DIP	phosphodiesterase 4D interacting protein [Source:HGNC Symbol;Acc:HGNC:15580]
CvsSt	ENSSSCG00000024494	10.5491	2.68306	1.04514	2.56719	0.0102527	0.033019	100512173	ST6GALNAC3	ST6 N-acetylgalactosaminide alpha-2,6-sialyltransferase 3 [Source:VGNC Symbol;Acc:VGNC:93511]
CvsSt	ENSSSCG00000024514	705.476	6.7533	0.719765	9.38266	6.43309e-21	1.5658e-18	100622319	SHISAL2B	shisa like 2B [Source:VGNC Symbol;Acc:VGNC:92852]
CvsSt	ENSSSCG00000024520	27.1566	2.18312	0.604251	3.61293	0.000302756	0.00206595	100144586	ENSSSCG00000024520
CvsSt	ENSSSCG00000024568	34.2451	5.5337	1.2977	4.26422	2.00602e-05	0.00022429	110260994	ENSSSCG00000024568
CvsSt	ENSSSCG00000024604	1005.66	3.41817	0.511679	6.68029	2.38464e-11	1.68927e-09	100144480	ATAT1	alpha tubulin acetyltransferase 1 [Source:VGNC Symbol;Acc:VGNC:85602]
CvsSt	ENSSSCG00000024633	19.6928	2.52866	0.745848	3.39031	0.000698124	0.00404452	100624964	JAKMIP3	Janus kinase and microtubule interacting protein 3 [Source:VGNC Symbol;Acc:VGNC:89275]
CvsSt	ENSSSCG00000024668	68.3157	2.99647	0.891101	3.36265	0.00077197	0.00435927	431673	KLK1	kallikrein 1 [Source:NCBI gene (formerly Entrezgene);Acc:431673]
CvsSt	ENSSSCG00000024759	11.1274	2.04677	0.7881	2.59709	0.00940174	0.0308436
CvsSt	ENSSSCG00000024784	37.0007	8.01765	1.62221	4.94241	7.71629e-07	1.48913e-05	100622149	CACNA1S	calcium voltage-gated channel subunit alpha1 S [Source:VGNC Symbol;Acc:VGNC:95598]
CvsSt	ENSSSCG00000024837	57.3662	2.0625	0.81739	2.52327	0.0116269	0.0363823	100625267	SYT12	synaptotagmin 12 [Source:VGNC Symbol;Acc:VGNC:93681]
CvsSt	ENSSSCG00000024872	75.7297	3.27374	0.598998	5.46536	4.61966e-08	1.31294e-06	100519258	CPT1C	carnitine palmitoyltransferase 1C [Source:VGNC Symbol;Acc:VGNC:86966]
CvsSt	ENSSSCG00000024876	6207.21	2.31533	0.513063	4.51276	6.39902e-06	8.65897e-05	100156875	TMEM181	transmembrane protein 181 [Source:VGNC Symbol;Acc:VGNC:94117]
CvsSt	ENSSSCG00000024881	8522.31	3.41156	0.67273	5.07121	3.95286e-07	8.47967e-06	100620963	TCP11L2	t-complex 11 like 2 [Source:VGNC Symbol;Acc:VGNC:93835]
CvsSt	ENSSSCG00000024911	1265.14	7.50721	0.761287	9.86122	6.13011e-23	1.83171e-20	100037920	ENSSSCG00000024911
CvsSt	ENSSSCG00000025038	31.8249	6.8033	1.97909	3.43759	0.000586918	0.00351947	100151780	KCNJ13	potassium inwardly rectifying channel subfamily J member 13 [Source:VGNC Symbol;Acc:VGNC:96389]
CvsSt	ENSSSCG00000025049	5806.72	3.32615	0.623886	5.33133	9.74939e-08	2.53899e-06	100144591	CYBRD1	cytochrome b reductase 1 [Source:VGNC Symbol;Acc:VGNC:95948]
CvsSt	ENSSSCG00000025052	462.643	4.47851	0.778919	5.74965	8.94272e-09	3.19732e-07	100736799	BPIFB6	BPI fold containing family B member 6 [Source:VGNC Symbol;Acc:VGNC:95811]
CvsSt	ENSSSCG00000025086	13.629	5.21532	1.49688	3.48413	0.000493745	0.00305932	100621771	ENSSSCG00000025086
CvsSt	ENSSSCG00000025096	215.427	3.5857	0.644962	5.55956	2.7046e-08	8.43133e-07	100627436	FBXO24	F-box protein 24 [Source:VGNC Symbol;Acc:VGNC:88036]
CvsSt	ENSSSCG00000025114	439.737	3.9132	0.437424	8.94601	3.68569e-19	7.28883e-17	102157898	FMNL3	formin like 3 [Source:VGNC Symbol;Acc:VGNC:88169]
CvsSt	ENSSSCG00000025208	375.184	3.37878	0.618434	5.46344	4.66996e-08	1.32525e-06	100141418	RNF39	ring finger protein 39 [Source:VGNC Symbol;Acc:VGNC:92391]
CvsSt	ENSSSCG00000025345	229.873	4.52168	0.81233	5.56631	2.60185e-08	8.12435e-07	100625536	GUCY2D	guanylate cyclase 2D, retinal [Source:VGNC Symbol;Acc:VGNC:88753]
CvsSt	ENSSSCG00000025503	33.5538	2.02642	0.48069	4.21564	2.49068e-05	0.000269127	100621610	ADGRG5	adhesion G protein-coupled receptor G5 [Source:VGNC Symbol;Acc:VGNC:85132]
CvsSt	ENSSSCG00000025561	827.748	3.7708	0.746488	5.05139	4.38611e-07	9.28321e-06	102158247	VASN	vasorin [Source:VGNC Symbol;Acc:VGNC:94803]
CvsSt	ENSSSCG00000025597	288897	11.1542	0.857566	13.0069	1.11837e-38	8.8468e-36	106507258	ENSSSCG00000025597
CvsSt	ENSSSCG00000025621	2.42099	4.18995	1.71412	2.44438	0.0145102	0.0431512	100521810	CXXC4	CXXC finger protein 4 [Source:VGNC Symbol;Acc:VGNC:87117]
CvsSt	ENSSSCG00000025631	3598.86	2.56364	0.7985	3.21057	0.00132474	0.00669244	110259374	ENSSSCG00000025631
CvsSt	ENSSSCG00000025672	233.261	2.60925	0.496536	5.2549	1.48104e-07	3.63746e-06	100623447	RAVER2	ribonucleoprotein, PTB binding 2 [Source:VGNC Symbol;Acc:VGNC:98283]
CvsSt	ENSSSCG00000025689	1600.87	2.59579	0.584785	4.43888	9.04293e-06	0.000114225	100625452	DVL2	dishevelled segment polarity protein 2 [Source:VGNC Symbol;Acc:VGNC:87491]
CvsSt	ENSSSCG00000025704	2166.06	2.95023	0.665989	4.42985	9.43008e-06	0.000118642	100157652	DENND2D	DENN domain containing 2D [Source:VGNC Symbol;Acc:VGNC:87249]
CvsSt	ENSSSCG00000025783	1973.51	3.67712	0.664914	5.53022	3.19835e-08	9.69978e-07	100623360	ENTPD3	ectonucleoside triphosphate diphosphohydrolase 3 [Source:VGNC Symbol;Acc:VGNC:87715]
CvsSt	ENSSSCG00000025784	2.16152	4.35285	1.74474	2.49485	0.0126011	0.0387357	100626354	CDH4	cadherin 4 [Source:VGNC Symbol;Acc:VGNC:95853]
CvsSt	ENSSSCG00000025789	2635.22	11.2357	1.39792	8.03746	9.17168e-16	1.38194e-13	106504189	ENSSSCG00000025789
CvsSt	ENSSSCG00000025793	23.4882	7.79232	1.79479	4.34164	1.41421e-05	0.000166835	100622826	ENSSSCG00000025793
CvsSt	ENSSSCG00000025821	6861.62	2.79117	0.619758	4.50364	6.67978e-06	8.9209e-05	100628208	C2CD2	C2 calcium dependent domain containing 2 [Source:VGNC Symbol;Acc:VGNC:85990]
CvsSt	ENSSSCG00000025834	119.246	5.43461	1.07581	5.05162	4.38074e-07	9.28321e-06	100622587	FNDC5	fibronectin type III domain containing 5 [Source:VGNC Symbol;Acc:VGNC:88185]
CvsSt	ENSSSCG00000025900	3308.25	2.24149	0.577879	3.87882	0.000104966	0.000877491	100524547	SH3BP5L	SH3 binding domain protein 5 like [Source:VGNC Symbol;Acc:VGNC:92820]
CvsSt	ENSSSCG00000026043	11234.2	6.28986	0.702478	8.95382	3.43401e-19	6.8626e-17	100153042	ENSSSCG00000026043
CvsSt	ENSSSCG00000026108	1104.62	2.88152	0.735762	3.91638	8.98901e-05	0.000769762	100738372	CDC42EP1	CDC42 effector protein 1 [Source:VGNC Symbol;Acc:VGNC:86455]
CvsSt	ENSSSCG00000026169	406.407	2.11538	0.46153	4.5834	4.57478e-06	6.545e-05	100519240	MFSD12	major facilitator superfamily domain containing 12 [Source:VGNC Symbol;Acc:VGNC:90185]
CvsSt	ENSSSCG00000026184	149.91	3.47587	0.659954	5.26683	1.38798e-07	3.44907e-06	100626771	MPP4	membrane palmitoylated protein 4 [Source:VGNC Symbol;Acc:VGNC:98135]
CvsSt	ENSSSCG00000026232	506.456	4.91287	0.879273	5.58743	2.3046e-08	7.31654e-07	100627969	FAM184B	family with sequence similarity 184 member B [Source:VGNC Symbol;Acc:VGNC:87938]
CvsSt	ENSSSCG00000026233	1316.64	2.38113	0.323331	7.36437	1.7798e-13	1.86682e-11	100519356	ENSSSCG00000026233	RNA polymerase III subunit G [Source:VGNC Symbol;Acc:VGNC:100335]
CvsSt	ENSSSCG00000026290	25.3886	2.31277	0.662223	3.49243	0.000478648	0.0029833	100622680	BBS12	Bardet-Biedl syndrome 12 [Source:HGNC Symbol;Acc:HGNC:26648]
CvsSt	ENSSSCG00000026297	48.2248	2.22353	0.474555	4.68552	2.79255e-06	4.35276e-05	100525825	KLB	klotho beta [Source:VGNC Symbol;Acc:VGNC:89485]
CvsSt	ENSSSCG00000026302	335.421	3.55621	0.722609	4.92134	8.59539e-07	1.6302e-05	102164100	ENSSSCG00000026302	marker of proliferation Ki-67 [Source:VGNC Symbol;Acc:VGNC:90244]
CvsSt	ENSSSCG00000026317	11.6044	2.93726	1.18113	2.48684	0.0128885	0.0394023	100625109	SLC10A2	solute carrier family 10 member 2 [Source:VGNC Symbol;Acc:VGNC:92915]
CvsSt	ENSSSCG00000026326	70.7142	2.81822	0.623139	4.52262	6.10786e-06	8.32653e-05	100518243	CCNF	cyclin F [Source:VGNC Symbol;Acc:VGNC:86356]
CvsSt	ENSSSCG00000026339	11169	2.87737	0.730817	3.93719	8.24407e-05	0.000717922	100155089	ENSSSCG00000026339
CvsSt	ENSSSCG00000026409	288.045	10.016	2.13558	4.69006	2.73129e-06	4.28187e-05	407745	TYR	tyrosinase [Source:VGNC Symbol;Acc:VGNC:94617]
CvsSt	ENSSSCG00000026423	768.66	2.68871	0.593423	4.53085	5.87476e-06	8.05869e-05	396578	SLC23A1	solute carrier family 23 member 1 [Source:VGNC Symbol;Acc:VGNC:92985]
CvsSt	ENSSSCG00000026453	13.4618	6.09185	1.88633	3.22948	0.00124017	0.00635309	100511318	ACSM5	acyl-CoA synthetase medium chain family member 5 [Source:VGNC Symbol;Acc:VGNC:85036]
CvsSt	ENSSSCG00000026486	49.363	5.07192	1.10314	4.59773	4.27119e-06	6.19943e-05	100627175	ENSSSCG00000026486
CvsSt	ENSSSCG00000026527	3.46537	5.00597	1.90774	2.62402	0.00868978	0.0290802	100510937	HCN1	hyperpolarization activated cyclic nucleotide gated potassium channel 1 [Source:VGNC Symbol;Acc:VGNC:88802]
CvsSt	ENSSSCG00000026585	502.644	2.4583	0.66934	3.67273	0.000239973	0.00170815	654289	PROCR	protein C receptor [Source:VGNC Symbol;Acc:VGNC:96506]
CvsSt	ENSSSCG00000026605	13.8592	5.63453	1.5799	3.5664	0.000361925	0.00238499	100286800	BPI	bactericidal permeability increasing protein [Source:VGNC Symbol;Acc:VGNC:95499]
CvsSt	ENSSSCG00000026707	117.13	3.08443	0.82247	3.7502	0.000176694	0.00133222	414375	XCR1	X-C motif chemokine receptor 1 [Source:VGNC Symbol;Acc:VGNC:94994]
CvsSt	ENSSSCG00000026754	9.45203	6.04555	1.54305	3.91794	8.93098e-05	0.000765138	100626830	ATCAY	ATCAY kinesin light chain interacting caytaxin [Source:VGNC Symbol;Acc:VGNC:85603]
CvsSt	ENSSSCG00000026784	291.021	2.13083	0.277016	7.69208	1.44768e-14	1.88247e-12	100620983	LMNB2	lamin B2 [Source:VGNC Symbol;Acc:VGNC:89761]
CvsSt	ENSSSCG00000026791	7.0928	4.05287	1.58554	2.55615	0.0105838	0.0338378	397670	RHCE	Rh blood group CcEe antigens [Source:NCBI gene (formerly Entrezgene);Acc:397670]
CvsSt	ENSSSCG00000026819	39.0467	3.74336	0.819803	4.56617	4.96715e-06	7.01181e-05	100511351	NID1	nidogen 1 [Source:VGNC Symbol;Acc:VGNC:90742]
CvsSt	ENSSSCG00000026849	22.6891	5.84652	1.57987	3.70064	0.000215059	0.00156793	100517790	CCNO	cyclin O [Source:VGNC Symbol;Acc:VGNC:86365]
CvsSt	ENSSSCG00000026850	338.965	2.53935	0.457762	5.5473	2.90108e-08	8.95561e-07	100125343	SNCG	synuclein gamma [Source:NCBI gene (formerly Entrezgene);Acc:100125343]
CvsSt	ENSSSCG00000026868	12308.9	9.52636	0.648516	14.6895	7.52895e-49	1.58819e-45	100627664	LRRC15	leucine rich repeat containing 15 [Source:VGNC Symbol;Acc:VGNC:98077]
CvsSt	ENSSSCG00000026890	1054.18	2.6408	0.48994	5.39005	7.04373e-08	1.8995e-06	100520836	GALNT6	polypeptide N-acetylgalactosaminyltransferase 6 [Source:VGNC Symbol;Acc:VGNC:88335]
CvsSt	ENSSSCG00000026919	24.258	2.01453	0.720167	2.7973	0.0051531	0.0192847
CvsSt	ENSSSCG00000026958	27.9828	3.82011	0.864769	4.4175	9.98507e-06	0.000124715	100623646	WNT10A	Wnt family member 10A [Source:VGNC Symbol;Acc:VGNC:95596]
CvsSt	ENSSSCG00000026964	1640.44	4.02334	0.711727	5.65293	1.5774e-08	5.18114e-07	100519396	STK36	serine/threonine kinase 36 [Source:VGNC Symbol;Acc:VGNC:95835]
CvsSt	ENSSSCG00000026985	342.425	9.93681	1.61965	6.13515	8.50777e-10	3.96855e-08	100620588	SNAP25	synaptosome associated protein 25 [Source:VGNC Symbol;Acc:VGNC:95509]
CvsSt	ENSSSCG00000026994	38.671	3.49049	0.644354	5.41704	6.05944e-08	1.66241e-06	100624519	ADAMTS10	ADAM metallopeptidase with thrombospondin type 1 motif 10 [Source:VGNC Symbol;Acc:VGNC:85073]
CvsSt	ENSSSCG00000027019	38.4419	3.14811	0.964512	3.26394	0.00109875	0.00576872	100153986	CACNA2D3	calcium voltage-gated channel auxiliary subunit alpha2delta 3 [Source:VGNC Symbol;Acc:VGNC:86122]
CvsSt	ENSSSCG00000027157	65043	4.9536	0.708379	6.99286	2.69333e-12	2.34554e-10	100737517	SLC40A1	solute carrier family 40 member 1 [Source:VGNC Symbol;Acc:VGNC:95497]
CvsSt	ENSSSCG00000027161	42.2659	2.13172	0.725707	2.93744	0.00330939	0.0137601	102167387	PIP5K1B	phosphatidylinositol-4-phosphate 5-kinase type 1 beta [Source:VGNC Symbol;Acc:VGNC:91458]
CvsSt	ENSSSCG00000027205	2970.29	3.88768	0.602466	6.45295	1.0969e-10	6.42736e-09	100627653	LPCAT3	lysophosphatidylcholine acyltransferase 3 [Source:VGNC Symbol;Acc:VGNC:89790]
CvsSt	ENSSSCG00000027312	991.122	2.57667	0.492985	5.22666	1.72597e-07	4.15831e-06	100627504	PTCH1	patched 1 [Source:VGNC Symbol;Acc:VGNC:96513]
CvsSt	ENSSSCG00000027331	162.129	6.73344	1.02613	6.56197	5.31029e-11	3.34937e-09	100101551	COL6A3	collagen type VI alpha 3 chain [Source:VGNC Symbol;Acc:VGNC:95982]
CvsSt	ENSSSCG00000027361	4018.26	3.88131	0.641889	6.0467	1.47842e-09	6.37906e-08	100511364	OVOL1	ovo like transcriptional repressor 1 [Source:VGNC Symbol;Acc:VGNC:91111]
CvsSt	ENSSSCG00000027421	24.6517	2.16133	0.722113	2.99306	0.00276191	0.0119354
CvsSt	ENSSSCG00000027443	60.1286	2.05321	0.665387	3.08573	0.00203052	0.00937941	100621398	MRAS	muscle RAS onco homolog [Source:VGNC Symbol;Acc:VGNC:90340]
CvsSt	ENSSSCG00000027465	13.8446	2.04753	0.809253	2.53015	0.0114014	0.035856	106504062	NLGN3	neuroligin 3 [Source:VGNC Symbol;Acc:VGNC:90778]
CvsSt	ENSSSCG00000027466	163.084	2.80261	0.655239	4.27723	1.89236e-05	0.000214486	100627524	PCOLCE	procollagen C-endopeptidase enhancer [Source:VGNC Symbol;Acc:VGNC:91227]
CvsSt	ENSSSCG00000027550	8160.76	2.25292	0.478935	4.70401	2.55101e-06	4.05032e-05	100627099	PLCD1	phospholipase C delta 1 [Source:VGNC Symbol;Acc:VGNC:91517]
CvsSt	ENSSSCG00000027632	20695.5	10.6886	0.956466	11.1751	5.39627e-29	2.38252e-26	100523275	ENSSSCG00000027632
CvsSt	ENSSSCG00000027654	6.05431	4.08282	1.65578	2.46579	0.013671	0.0412039	100622872	NETO1	neuropilin and tolloid like 1 [Source:VGNC Symbol;Acc:VGNC:90690]
CvsSt	ENSSSCG00000027684	6.38524	4.40868	1.68157	2.62177	0.00874735	0.0292122	100431101	TRIM63	tripartite motif containing 63 [Source:VGNC Symbol;Acc:VGNC:94424]
CvsSt	ENSSSCG00000027725	14.5341	6.6552	1.58105	4.20937	2.56086e-05	0.000274677
CvsSt	ENSSSCG00000027745	911.616	2.09558	0.496959	4.21681	2.47782e-05	0.000268195	100620416	ABCG1	ATP binding cassette subfamily G member 1 [Source:VGNC Symbol;Acc:VGNC:97858]
CvsSt	ENSSSCG00000027768	505.522	8.47429	1.16352	7.2833	3.2574e-13	3.22093e-11	100624843	SLC29A4	solute carrier family 29 member 4 [Source:VGNC Symbol;Acc:VGNC:93045]
CvsSt	ENSSSCG00000027822	4.73013	5.04932	1.59668	3.16239	0.00156481	0.00767251	100526112	CORT	cortistatin [Source:VGNC Symbol;Acc:VGNC:86918]
CvsSt	ENSSSCG00000027855	60.6163	4.67591	0.939055	4.97937	6.37902e-07	1.27212e-05	100307052	SOCS1	suppressor of cytokine signaling 1 [Source:VGNC Symbol;Acc:VGNC:93330]
CvsSt	ENSSSCG00000027857	4367.17	2.48099	0.556145	4.46105	8.15604e-06	0.000105192	100523116	DMXL1	Dmx like 1 [Source:VGNC Symbol;Acc:VGNC:87359]
CvsSt	ENSSSCG00000027875	2.63622	4.62561	1.77662	2.60359	0.0092252	0.0304116	100153371	CA14	carbonic anhydrase 14 [Source:VGNC Symbol;Acc:VGNC:86098]
CvsSt	ENSSSCG00000027882	168.669	4.37091	0.894444	4.88673	1.02524e-06	1.90265e-05	100516689	C1orf115	chromosome 10 C1orf115 homolog [Source:VGNC Symbol;Acc:VGNC:96111]
CvsSt	ENSSSCG00000027890	83.6868	2.03827	0.625207	3.26016	0.00111351	0.00583816	100624152	ENSSSCG00000027890
CvsSt	ENSSSCG00000027935	3855.97	9.43639	0.803563	11.7432	7.65493e-32	3.92781e-29	100622006	FHOD3	formin homology 2 domain containing 3 [Source:VGNC Symbol;Acc:VGNC:88132]
CvsSt	ENSSSCG00000027967	179.461	2.74069	0.805689	3.40167	0.00066976	0.00391132	100627993	IGSF6	immunoglobulin superfamily member 6 [Source:VGNC Symbol;Acc:VGNC:89068]
CvsSt	ENSSSCG00000028022	141.454	7.80351	1.22246	6.38347	1.73115e-10	9.55404e-09
CvsSt	ENSSSCG00000028060	8.00565	4.17548	1.52609	2.73607	0.00621785	0.0223402	100521009	SLC4A8	solute carrier family 4 member 8 [Source:VGNC Symbol;Acc:VGNC:98326]
CvsSt	ENSSSCG00000028204	9.24916	3.28579	0.9379	3.50335	0.000459439	0.00288947	100623094	TREH	trehalase [Source:VGNC Symbol;Acc:VGNC:94382]
CvsSt	ENSSSCG00000028249	270.777	2.14636	0.363659	5.9021	3.58899e-09	1.40488e-07	100623356	SKA3	spindle and kinetochore associated complex subunit 3 [Source:VGNC Symbol;Acc:VGNC:92899]
CvsSt	ENSSSCG00000028284	57.5814	8.62891	1.5933	5.41576	6.10284e-08	1.66949e-06	100620758	KCND1	potassium voltage-gated channel subfamily D member 1 [Source:VGNC Symbol;Acc:VGNC:89336]
CvsSt	ENSSSCG00000028334	42261.9	8.8691	0.920551	9.63455	5.71415e-22	1.64368e-19	100511256	KRT74	keratin 74 [Source:NCBI gene (formerly Entrezgene);Acc:100511256]
CvsSt	ENSSSCG00000028454	5726.86	2.95374	0.611296	4.83194	1.35211e-06	2.38567e-05	100620922	C16orf72	chromosome 3 C16orf72 homolog [Source:VGNC Symbol;Acc:VGNC:86016]
CvsSt	ENSSSCG00000028471	30.349	7.16781	1.65264	4.33718	1.44321e-05	0.00016976	100521908	DTHD1	death domain containing 1 [Source:VGNC Symbol;Acc:VGNC:98920]
CvsSt	ENSSSCG00000028559	228.146	7.25452	0.950907	7.62905	2.3649e-14	2.97335e-12	100155722	LZTS1	leucine zipper tumor suppressor 1 [Source:VGNC Symbol;Acc:VGNC:89928]
CvsSt	ENSSSCG00000028670	187.347	2.87552	0.878577	3.27293	0.00106438	0.00563463	100627489	ENSSSCG00000028670
CvsSt	ENSSSCG00000028671	5.35347	5.36335	2.17692	2.46373	0.01375	0.0413895	100625953	CEL	carboxyl ester lipase [Source:VGNC Symbol;Acc:VGNC:86536]
CvsSt	ENSSSCG00000028672	106.562	2.46685	0.677938	3.63875	0.000273966	0.00190243	100625192	GCKR	glucokinase regulator [Source:VGNC Symbol;Acc:VGNC:88385]
CvsSt	ENSSSCG00000028695	121.933	4.47365	0.752004	5.94896	2.69848e-09	1.09701e-07	100522845	ENSSSCG00000028695
CvsSt	ENSSSCG00000028768	120.212	7.70126	1.39336	5.52711	3.25547e-08	9.81033e-07
CvsSt	ENSSSCG00000028996	16310.3	8.02593	0.784545	10.23	1.45457e-24	4.84475e-22	100517137	ALDH1A1	aldehyde dehydrogenase 1 family member A1 [Source:VGNC Symbol;Acc:VGNC:97877]
CvsSt	ENSSSCG00000029038	129.755	10.19	1.73569	5.87087	4.33518e-09	1.66606e-07
CvsSt	ENSSSCG00000029151	3.67676	4.01414	1.66595	2.40952	0.0159735	0.0465189	100523674	RASIP1	Ras interacting protein 1 [Source:VGNC Symbol;Acc:VGNC:92116]
CvsSt	ENSSSCG00000029163	38.3385	2.75038	0.815469	3.37276	0.000744187	0.00424749	100518784	BCAT1	branched chain amino acid transaminase 1 [Source:VGNC Symbol;Acc:VGNC:85773]
CvsSt	ENSSSCG00000029189	4.65779	5.47744	1.67224	3.27551	0.00105473	0.00559752	100623166	DCHS1	dachsous cadherin-related 1 [Source:VGNC Symbol;Acc:VGNC:97959]
CvsSt	ENSSSCG00000029199	42.3209	4.39212	0.901119	4.87408	1.09317e-06	2.00134e-05	100512800	ENSSSCG00000029199	sodium voltage-gated channel beta subunit 4 [Source:VGNC Symbol;Acc:VGNC:92636]
CvsSt	ENSSSCG00000029239	10.6237	4.83161	1.6012	3.0175	0.00254871	0.0112163	100522482	MZB1	marginal zone B and B1 cell specific protein [Source:VGNC Symbol;Acc:VGNC:90550]
CvsSt	ENSSSCG00000029249	6.98719	5.83631	1.73377	3.36626	0.00076196	0.00431698	100622883	NAV3	neuron navigator 3 [Source:VGNC Symbol;Acc:VGNC:90589]
CvsSt	ENSSSCG00000029284	23.8888	2.88122	0.720134	4.00095	6.30878e-05	0.000575455	100622946	NPHS1	NPHS1 adhesion molecule, nephrin [Source:VGNC Symbol;Acc:VGNC:90849]
CvsSt	ENSSSCG00000029289	65.1908	3.84639	0.90977	4.22787	2.35919e-05	0.000256819	100516302	CST9L	cystatin 9 like [Source:HGNC Symbol;Acc:HGNC:16233]
CvsSt	ENSSSCG00000029297	34603.6	10.9696	0.738364	14.8566	6.30241e-50	2.39302e-46	100625464	KRTAP27-1	keratin associated protein 27-1 [Source:VGNC Symbol;Acc:VGNC:89602]
CvsSt	ENSSSCG00000029305	244.876	2.93899	0.748023	3.92902	8.52945e-05	0.000736387	100625689	FNDC4	fibronectin type III domain containing 4 [Source:VGNC Symbol;Acc:VGNC:88184]
CvsSt	ENSSSCG00000029311	126.959	3.61189	0.728742	4.95634	7.18337e-07	1.40449e-05	100624901	MYPN	myopalladin [Source:HGNC Symbol;Acc:HGNC:23246]
CvsSt	ENSSSCG00000029365	680.042	2.63584	0.660434	3.99107	6.57759e-05	0.000594362	100627974	MSI1	musashi RNA binding protein 1 [Source:VGNC Symbol;Acc:VGNC:90421]
CvsSt	ENSSSCG00000029388	620.732	5.94144	0.989557	6.00414	1.9235e-09	8.13311e-08	100737701	PDE2A	phosphodiesterase 2A [Source:VGNC Symbol;Acc:VGNC:91251]
CvsSt	ENSSSCG00000029392	107.925	2.11387	0.444218	4.75863	1.94912e-06	3.22617e-05	100627454	HUNK	hormonally up-regulated Neu-associated kinase [Source:VGNC Symbol;Acc:VGNC:89007]
CvsSt	ENSSSCG00000029443	8.46102	6.01603	1.58631	3.79247	0.000149156	0.00116388	100622411	TKTL1	transketolase like 1 [Source:VGNC Symbol;Acc:VGNC:94009]
CvsSt	ENSSSCG00000029482	122.383	4.13427	0.799958	5.16811	2.36479e-07	5.49518e-06	100152393	CHST15	carbohydrate sulfotransferase 15 [Source:VGNC Symbol;Acc:VGNC:86677]
CvsSt	ENSSSCG00000029484	1018.09	2.47922	0.717982	3.45304	0.000554311	0.00335467	100622067	EMB	embigin [Source:VGNC Symbol;Acc:VGNC:87668]
CvsSt	ENSSSCG00000029509	84.6493	2.11353	0.507781	4.16229	3.15071e-05	0.000327063	100623146	KIF22	kinesin family member 22 [Source:VGNC Symbol;Acc:VGNC:89465]
CvsSt	ENSSSCG00000029536	125.75	3.61604	0.597741	6.04951	1.4529e-09	6.28323e-08	100521045	SCTR	secretin receptor [Source:VGNC Symbol;Acc:VGNC:95482]
CvsSt	ENSSSCG00000029538	20918.6	3.05926	0.608239	5.0297	4.91255e-07	1.01706e-05	397470	PPP2R1B	protein phosphatase 2 scaffold subunit Abeta [Source:VGNC Symbol;Acc:VGNC:91747]
CvsSt	ENSSSCG00000029541	632.287	2.2941	0.53006	4.328	1.50469e-05	0.000175902	100737524	PSD2	pleckstrin and Sec7 domain containing 2 [Source:VGNC Symbol;Acc:VGNC:91896]
CvsSt	ENSSSCG00000029545	106993	11.3887	0.822782	13.8417	1.42742e-43	1.80663e-40	100739328	GPRC5D	G protein-coupled receptor class C group 5 member D [Source:VGNC Symbol;Acc:VGNC:88644]
CvsSt	ENSSSCG00000029576	3777.37	2.87566	0.682169	4.21547	2.49263e-05	0.000269184	100153356	ZNF239	zinc finger protein 239 [Source:VGNC Symbol;Acc:VGNC:95210]
CvsSt	ENSSSCG00000029626	250.233	3.80305	0.521972	7.28593	3.19453e-13	3.1753e-11	100620656	NECAB3	N-terminal EF-hand calcium binding protein 3 [Source:VGNC Symbol;Acc:VGNC:95670]
CvsSt	ENSSSCG00000029658	553.582	6.90097	1.2426	5.55366	2.79757e-08	8.67842e-07	100512727	ENSSSCG00000029658
CvsSt	ENSSSCG00000029714	8.19535	5.55996	1.7212	3.23028	0.00123669	0.00634042	100113424	BPIFB2	BPI fold containing family B member 2 [Source:VGNC Symbol;Acc:VGNC:95771]
CvsSt	ENSSSCG00000029715	55.5898	2.12641	0.66902	3.1784	0.00148088	0.00734254	100620523	OLFM1	olfactomedin 1 [Source:VGNC Symbol;Acc:VGNC:91031]
CvsSt	ENSSSCG00000029719	14.037	2.18533	0.766346	2.85162	0.00434971	0.0169637
CvsSt	ENSSSCG00000029796	2.85677	4.18075	1.75623	2.38053	0.0172876	0.0491105	100625139	KBTBD11	kelch repeat and BTB domain containing 11 [Source:VGNC Symbol;Acc:VGNC:96196]
CvsSt	ENSSSCG00000029813	418.949	4.92543	0.791362	6.22399	4.8466e-10	2.36537e-08	100622240	TSPAN5	tetraspanin 5 [Source:VGNC Symbol;Acc:VGNC:94514]
CvsSt	ENSSSCG00000029837	646.048	2.7849	0.592075	4.70363	2.55581e-06	4.05102e-05	100511470	VWA8	von Willebrand factor A domain containing 8 [Source:VGNC Symbol;Acc:VGNC:94886]
CvsSt	ENSSSCG00000029874	54544.7	4.71695	0.668644	7.05449	1.73229e-12	1.58113e-10	100623524	DUSP14	dual specificity phosphatase 14 [Source:VGNC Symbol;Acc:VGNC:87479]
CvsSt	ENSSSCG00000029945	96.7338	4.08145	0.847413	4.81636	1.46199e-06	2.54077e-05	100525698	GCAT	glycine C-acetyltransferase [Source:VGNC Symbol;Acc:VGNC:88378]
CvsSt	ENSSSCG00000030048	245.633	2.02686	0.423746	4.78318	1.72541e-06	2.92473e-05	100739199	PLEKHG2	pleckstrin homology and RhoGEF domain containing G2 [Source:VGNC Symbol;Acc:VGNC:91543]
CvsSt	ENSSSCG00000030165	1087.63	2.77484	0.687104	4.03845	5.3806e-05	0.000505446	100156484	MAFF	MAF bZIP transcription factor F [Source:VGNC Symbol;Acc:VGNC:89947]
CvsSt	ENSSSCG00000030241	921.267	2.06221	0.556976	3.70251	0.000213475	0.00155818	100517321	TSC22D3	TSC22 domain family member 3 [Source:VGNC Symbol;Acc:VGNC:94483]
CvsSt	ENSSSCG00000030255	14313.8	2.1376	0.498001	4.29237	1.7678e-05	0.000202422	449528	EIF4G1	eukaryotic translation initiation factor 4 gamma 1 [Source:VGNC Symbol;Acc:VGNC:87631]
CvsSt	ENSSSCG00000030350	191959	11.2603	0.760387	14.8086	1.28848e-49	4.07697e-46	100623387	ENSSSCG00000030350
CvsSt	ENSSSCG00000030373	8720.64	2.47338	0.584362	4.23262	2.30985e-05	0.000252076	100628086	METTL9	methyltransferase like 9 [Source:NCBI gene (formerly Entrezgene);Acc:100628086]
CvsSt	ENSSSCG00000030425	1481.73	2.98492	0.635412	4.69761	2.6322e-06	4.14708e-05	100738292	SPHK2	sphingosine kinase 2 [Source:VGNC Symbol;Acc:VGNC:93405]
CvsSt	ENSSSCG00000030461	25972.5	10.5585	0.718022	14.705	5.98807e-49	1.42104e-45	100625356	HEPHL1	hephaestin like 1 [Source:VGNC Symbol;Acc:VGNC:88848]
CvsSt	ENSSSCG00000030469	205.968	2.89829	0.60622	4.78092	1.74491e-06	2.94706e-05	100627208	BUB1	BUB1 mitotic checkpoint serine/threonine kinase [Source:VGNC Symbol;Acc:VGNC:85918]
CvsSt	ENSSSCG00000030518	11.9817	3.14736	1.08183	2.9093	0.00362242	0.0147366	100737240	PRSS33	serine protease 33 [Source:VGNC Symbol;Acc:VGNC:91882]
CvsSt	ENSSSCG00000030539	255.9	3.34837	0.964481	3.47168	0.000517219	0.00317472	100620705	KLK15	kallikrein related peptidase 15 [Source:VGNC Symbol;Acc:VGNC:89542]
CvsSt	ENSSSCG00000030561	24.7299	5.20639	1.1663	4.46404	8.04285e-06	0.000103944	100623034	LMTK3	lemur tyrosine kinase 3 [Source:VGNC Symbol;Acc:VGNC:89769]
CvsSt	ENSSSCG00000030637	1920.57	3.16756	0.641299	4.93929	7.84067e-07	1.50969e-05	100523191	IRGQ	immunity related GTPase Q [Source:VGNC Symbol;Acc:VGNC:89213]
CvsSt	ENSSSCG00000030680	6085.54	6.19258	0.801509	7.72615	1.10851e-14	1.48204e-12	100512951	TCF7	transcription factor 7 [Source:VGNC Symbol;Acc:VGNC:96767]
CvsSt	ENSSSCG00000030698	3.18486	4.81929	1.71302	2.81332	0.00490328	0.018588	100621820	ENSSSCG00000030698
CvsSt	ENSSSCG00000030781	209.181	3.59389	0.748039	4.80442	1.552e-06	2.66649e-05	100525534	C17orf67	chromosome 12 C17orf67 homolog [Source:VGNC Symbol;Acc:VGNC:85924]
CvsSt	ENSSSCG00000030857	5016.39	2.37596	0.492979	4.8196	1.43848e-06	2.51469e-05	106504183	LENG8	leukocyte receptor cluster member 8 [Source:VGNC Symbol;Acc:VGNC:89681]
CvsSt	ENSSSCG00000030991	13.1099	3.82185	0.92188	4.14571	3.38761e-05	0.000346892
CvsSt	ENSSSCG00000031003	428.739	7.53201	0.964748	7.80723	5.84586e-15	7.98444e-13
CvsSt	ENSSSCG00000031011	902.093	8.4204	0.974809	8.638	5.72075e-18	1.00563e-15	100516533	CCDC160	coiled-coil domain containing 160 [Source:VGNC Symbol;Acc:VGNC:86269]
CvsSt	ENSSSCG00000031035	25.5805	4.25078	0.959828	4.42869	9.48067e-06	0.000119199	100523640	GP5	glycoprotein V platelet [Source:VGNC Symbol;Acc:VGNC:88566]
CvsSt	ENSSSCG00000031082	2184.51	4.11909	0.743248	5.54201	2.99025e-08	9.16396e-07	100523971	ATP13A2	ATPase cation transporting 13A2 [Source:VGNC Symbol;Acc:VGNC:85638]
CvsSt	ENSSSCG00000031107	67.459	2.28996	0.447058	5.12228	3.01856e-07	6.71046e-06	100519464	GLT6D1	glycosyltransferase 6 domain containing 1 [Source:VGNC Symbol;Acc:VGNC:88499]
CvsSt	ENSSSCG00000031201	11.4395	2.12812	0.696444	3.05569	0.0022454	0.0101329	110255660	LMOD1	leiomodin 1 [Source:VGNC Symbol;Acc:VGNC:96405]
CvsSt	ENSSSCG00000031236	91.1446	4.05182	1.05827	3.82871	0.000128818	0.00103496	100515356	GLIPR2	GLI pathosis related 2 [Source:VGNC Symbol;Acc:VGNC:98023]
CvsSt	ENSSSCG00000031259	8.53465	3.41574	1.33239	2.56362	0.0103586	0.0332436
CvsSt	ENSSSCG00000031261	44.4676	2.58272	0.496482	5.20204	1.97116e-07	4.69543e-06	100523840	RHOQ	ras homolog family member Q [Source:VGNC Symbol;Acc:VGNC:92292]
CvsSt	ENSSSCG00000031329	19.6385	4.97703	1.13642	4.37958	1.18908e-05	0.000144155	100625270	ST8SIA1	ST8 alpha-N-acetyl-neuraminide alpha-2,8-sialyltransferase 1 [Source:VGNC Symbol;Acc:VGNC:93516]
CvsSt	ENSSSCG00000031344	5.91753	5.64221	1.76339	3.19964	0.00137599	0.00689812	110261085	AJAP1	adherens junctions associated protein 1 [Source:VGNC Symbol;Acc:VGNC:85207]
CvsSt	ENSSSCG00000031352	8.15218	4.58227	1.83946	2.49109	0.012735	0.0390462	100628189	DYNLT5	dynein light chain Tctex-type family member 5 [Source:VGNC Symbol;Acc:VGNC:93838]
CvsSt	ENSSSCG00000031359	18452.7	8.88554	0.677747	13.1104	2.87086e-39	2.47742e-36	110260925	MT4	metallothionein 4 [Source:VGNC Symbol;Acc:VGNC:90433]
CvsSt	ENSSSCG00000031361	1037.17	3.16407	0.591674	5.34766	8.90994e-08	2.34287e-06	102159820	CELSR1	cadherin EGF LAG seven-pass G-type receptor 1 [Source:HGNC Symbol;Acc:HGNC:1850]
CvsSt	ENSSSCG00000031398	70.6039	2.54078	0.574367	4.42361	9.70662e-06	0.000121717	110257938	ENSSSCG00000031398
CvsSt	ENSSSCG00000031441	1334.16	3.01876	0.634221	4.75979	1.9379e-06	3.21038e-05	110260607	GRAMD4	GRAM domain containing 4 [Source:VGNC Symbol;Acc:VGNC:88659]
CvsSt	ENSSSCG00000031529	13.1765	2.62006	0.793194	3.30318	0.000955953	0.00517206	100155760	ENSSSCG00000031529
CvsSt	ENSSSCG00000031608	14.1753	5.32445	1.58748	3.35403	0.000796435	0.00445896
CvsSt	ENSSSCG00000031633	31.0935	2.10261	0.650893	3.23034	0.00123642	0.00634042
CvsSt	ENSSSCG00000031694	5.25181	4.05719	1.64518	2.4661	0.0136592	0.0411824	780430	DIRAS2	DIRAS family GTPase 2 [Source:VGNC Symbol;Acc:VGNC:87313]
CvsSt	ENSSSCG00000031700	7.43545	4.42515	1.70798	2.59087	0.00957347	0.0312808	100621442	SLC2A9	solute carrier family 2 member 9 [Source:VGNC Symbol;Acc:VGNC:93054]
CvsSt	ENSSSCG00000031706	2242.46	4.76987	0.699772	6.81632	9.3404e-12	7.0931e-10	100519075	ENSSSCG00000031706
CvsSt	ENSSSCG00000031724	1853.11	3.09893	0.507747	6.1033	1.039e-09	4.74168e-08	110260197	LYNX1	Ly6/neurotoxin 1 [Source:HGNC Symbol;Acc:HGNC:29604]
CvsSt	ENSSSCG00000031733	11.6554	5.43938	1.72087	3.16082	0.00157325	0.00770593	100152595	AKAP12	A-kinase anchoring protein 12 [Source:VGNC Symbol;Acc:VGNC:85216]
CvsSt	ENSSSCG00000031786	188.721	2.14456	0.286147	7.49462	6.64889e-14	7.60417e-12	110261145	NCDN	neurochondrin [Source:VGNC Symbol;Acc:VGNC:90606]
CvsSt	ENSSSCG00000031819	217.181	3.28373	0.6128	5.35857	8.38834e-08	2.22731e-06	100520600	TP53I11	tumor protein p53 inducible protein 11 [Source:VGNC Symbol;Acc:VGNC:94326]
CvsSt	ENSSSCG00000031858	4.09388	5.27635	1.90245	2.77345	0.00554653	0.0204627	100627780	KCNJ10	potassium inwardly rectifying channel subfamily J member 10 [Source:VGNC Symbol;Acc:VGNC:89353]
CvsSt	ENSSSCG00000031905	21.7301	5.09408	1.60586	3.17219	0.00151296	0.00747621	733666	KCNS3	potassium voltage-gated channel modifier subfamily S member 3 [Source:VGNC Symbol;Acc:VGNC:89387]
CvsSt	ENSSSCG00000031957	86.1675	4.3212	0.871681	4.95731	7.14742e-07	1.39907e-05	102165175	RIMS2	regulating synaptic membrane exocytosis 2 [Source:HGNC Symbol;Acc:HGNC:17283]
CvsSt	ENSSSCG00000031977	69.8502	2.74638	0.57582	4.76951	1.84677e-06	3.08588e-05	100623280	PTCH2	patched 2 [Source:VGNC Symbol;Acc:VGNC:91941]
CvsSt	ENSSSCG00000031978	5.42619	5.48278	1.53902	3.5625	0.000367336	0.00241191
CvsSt	ENSSSCG00000031999	22.7087	3.29115	1.09449	3.00701	0.00263828	0.0115277	100153378	GPR18	G protein-coupled receptor 18 [Source:VGNC Symbol;Acc:VGNC:88620]
CvsSt	ENSSSCG00000032048	151.496	4.15861	0.655084	6.34821	2.17832e-10	1.15841e-08	106508718	SCRG1	stimulator of chondrosis 1 [Source:VGNC Symbol;Acc:VGNC:92646]
CvsSt	ENSSSCG00000032053	35.9993	5.01339	1.40184	3.57629	0.000348501	0.00231258	100622364	ST8SIA5	ST8 alpha-N-acetyl-neuraminide alpha-2,8-sialyltransferase 5 [Source:VGNC Symbol;Acc:VGNC:93520]
CvsSt	ENSSSCG00000032054	125.843	3.658	0.555105	6.58975	4.4058e-11	2.83539e-09	110259876	CNPY4	canopy FGF signaling regulator 4 [Source:VGNC Symbol;Acc:VGNC:86842]
CvsSt	ENSSSCG00000032056	181.1	10.557	1.51372	6.97417	3.07691e-12	2.60782e-10	100622474	ENSSSCG00000032056	MPV17 mitochondrial inner membrane protein like [Source:VGNC Symbol;Acc:VGNC:98139]
CvsSt	ENSSSCG00000032131	4.01091	4.8252	1.58059	3.05278	0.00226729	0.0101953	110259313	NCAN	neurocan [Source:VGNC Symbol;Acc:VGNC:90596]
CvsSt	ENSSSCG00000032172	20.1287	7.48381	1.93308	3.87144	0.000108193	0.000900168
CvsSt	ENSSSCG00000032241	19649.4	5.7985	0.93145	6.22524	4.80832e-10	2.35273e-08	100049669	GPNMB	glycoprotein nmb [Source:VGNC Symbol;Acc:VGNC:88593]
CvsSt	ENSSSCG00000032279	151.015	5.28093	0.877475	6.01832	1.76233e-09	7.55256e-08	110258072	SAPCD2	suppressor APC domain containing 2 [Source:VGNC Symbol;Acc:VGNC:92578]
CvsSt	ENSSSCG00000032337	2.01479	4.01483	1.64594	2.43923	0.0147185	0.0436542	100513119	ENSSSCG00000032337
CvsSt	ENSSSCG00000032383	5.98008	5.29063	1.60738	3.29147	0.000996644	0.00534651	100514340	ENSSSCG00000032383
CvsSt	ENSSSCG00000032411	5869.14	7.3737	0.747796	9.86057	6.1696e-23	1.83171e-20	100620304	ENGASE	endo-beta-N-acetylglucosaminidase [Source:VGNC Symbol;Acc:VGNC:87699]
CvsSt	ENSSSCG00000032423	54.5765	2.33622	0.871718	2.68002	0.00736177	0.0255182	100620623	SPOCK1	SPARC (osteonectin), cwcv and kazal like domains proteoglycan 1 [Source:VGNC Symbol;Acc:VGNC:96619]
CvsSt	ENSSSCG00000032433	14.1811	6.28256	1.65315	3.80035	0.000144493	0.00113262	100151829	PTCHD1	patched domain containing 1 [Source:VGNC Symbol;Acc:VGNC:91942]
CvsSt	ENSSSCG00000032443	43.328	2.8326	0.548597	5.16335	2.42569e-07	5.61606e-06	102162253	KIAA0895L	KIAA0895 like [Source:VGNC Symbol;Acc:VGNC:89437]
CvsSt	ENSSSCG00000032527	2911.39	2.00531	0.541575	3.70273	0.00021329	0.00155742	100623777	FOSL2	FOS like 2, AP-1 transcription factor subunit [Source:VGNC Symbol;Acc:VGNC:88192]
CvsSt	ENSSSCG00000032532	21.135	5.01431	1.20617	4.15721	3.22157e-05	0.000333093	397498	CHRM2	cholinergic receptor muscarinic 2 [Source:NCBI gene (formerly Entrezgene);Acc:397498]
CvsSt	ENSSSCG00000032536	25.4926	2.09671	0.49043	4.27525	1.90925e-05	0.000215628	100511757	B3GNT8	UDP-GlcNAc:betaGal beta-1,3-N-acetylglucosaminyltransferase 8 [Source:VGNC Symbol;Acc:VGNC:85727]
CvsSt	ENSSSCG00000032566	132.827	2.44176	0.403127	6.05706	1.38633e-09	6.02277e-08	100156548	ZHX3	zinc fingers and homeoboxes 3 [Source:VGNC Symbol;Acc:VGNC:95717]
CvsSt	ENSSSCG00000032581	317.632	3.93925	0.846297	4.65469	3.24475e-06	4.93551e-05
CvsSt	ENSSSCG00000032587	13.1422	6.43359	1.64199	3.91817	8.92246e-05	0.000764754	110258356	ENSSSCG00000032587
CvsSt	ENSSSCG00000032601	354.689	5.14342	0.664871	7.73597	1.02619e-14	1.38171e-12	100157105	RASSF2	Ras association domain family member 2 [Source:VGNC Symbol;Acc:VGNC:96531]
CvsSt	ENSSSCG00000032647	20.6697	4.07286	1.19857	3.39809	0.00067858	0.00395179
CvsSt	ENSSSCG00000032652	16.8906	2.27135	0.790781	2.87229	0.00407508	0.0161296	100625890	SLFN11	schlafen family member 11 [Source:HGNC Symbol;Acc:HGNC:26633]
CvsSt	ENSSSCG00000032723	1347.67	4.12724	0.409625	10.0756	7.07916e-24	2.3172e-21	100524160	ACER3	alkaline ceramidase 3 [Source:HGNC Symbol;Acc:HGNC:16066]
CvsSt	ENSSSCG00000032751	4.48169	3.80822	1.59552	2.38682	0.016995	0.0485625	100517266	ENSSSCG00000032751
CvsSt	ENSSSCG00000032786	54.9397	2.42798	0.475421	5.10701	3.27297e-07	7.21688e-06	100628182	ZC3HAV1L	zinc finger CCCH-type containing, antiviral 1 like [Source:VGNC Symbol;Acc:VGNC:95103]
CvsSt	ENSSSCG00000032797	3.54472	4.93978	1.85668	2.66055	0.00780136	0.0267344	100512567	ENSSSCG00000032797
CvsSt	ENSSSCG00000032870	181.199	2.79045	0.513334	5.43594	5.4509e-08	1.51087e-06
CvsSt	ENSSSCG00000032892	21.6808	7.46697	1.61041	4.63669	3.54029e-06	5.28399e-05	100523077	ENSSSCG00000032892
CvsSt	ENSSSCG00000032905	10.5855	6.14993	1.68885	3.6415	0.000271059	0.00188915
CvsSt	ENSSSCG00000032911	407.277	2.54091	0.744331	3.41368	0.000640913	0.00377763	110259213	DUSP8	dual specificity phosphatase 8 [Source:VGNC Symbol;Acc:VGNC:87489]
CvsSt	ENSSSCG00000032919	1019.63	2.58191	0.697429	3.70204	0.000213876	0.00155991	100462747	ATG4B	autophagy related 4B cysteine peptidase [Source:VGNC Symbol;Acc:VGNC:95947]
CvsSt	ENSSSCG00000032941	1931.81	2.14821	0.478364	4.49073	7.0979e-06	9.3743e-05	100624404	SIK2	salt inducible kinase 2 [Source:VGNC Symbol;Acc:VGNC:92872]
CvsSt	ENSSSCG00000032956	80.8371	9.60389	1.57641	6.09226	1.1133e-09	5.00852e-08	100622402	BMERB1	bMERB domain containing 1 [Source:VGNC Symbol;Acc:VGNC:85836]
CvsSt	ENSSSCG00000032960	307.769	3.25923	0.845105	3.8566	0.000114974	0.00094534	110261152	MANEAL	mannosidase endo-alpha like [Source:VGNC Symbol;Acc:VGNC:89972]
CvsSt	ENSSSCG00000032996	1563.42	5.71326	0.857234	6.66475	2.65109e-11	1.8504e-09
CvsSt	ENSSSCG00000033037	2546.43	2.47604	0.558945	4.42985	9.43003e-06	0.000118642	100153622	SLC25A37	solute carrier family 25 member 37 [Source:HGNC Symbol;Acc:HGNC:29786]
CvsSt	ENSSSCG00000033059	15.3469	3.44054	1.09642	3.13798	0.00170118	0.00819305	100524247	CASKIN1	CASK interacting protein 1 [Source:VGNC Symbol;Acc:VGNC:86200]
CvsSt	ENSSSCG00000033067	29.0248	4.30004	1.01785	4.22463	2.39338e-05	0.000259944	100623172	ENSSSCG00000033067	glycosyltransferase 1 domain containing 1 [Source:VGNC Symbol;Acc:VGNC:88498]
CvsSt	ENSSSCG00000033084	15.6532	5.46741	1.52318	3.58948	0.000331339	0.00222043
CvsSt	ENSSSCG00000033085	13632.3	10.9685	1.03315	10.6165	2.49645e-26	9.29316e-24
CvsSt	ENSSSCG00000033117	17.4932	2.81989	0.844123	3.34062	0.000835924	0.00463223	100524773	ENSSSCG00000033117
CvsSt	ENSSSCG00000033120	102.482	4.47735	0.950106	4.71247	2.44729e-06	3.92082e-05	100152369	PALM2AKAP2	PALM2-AKAP2 fusion [Source:NCBI gene (formerly Entrezgene);Acc:100152369]
CvsSt	ENSSSCG00000033142	12612.5	3.56988	0.481677	7.41135	1.25024e-13	1.35163e-11	110260774	ENDOU	endonuclease, poly(U) specific [Source:VGNC Symbol;Acc:VGNC:103233]
CvsSt	ENSSSCG00000033191	43.8359	3.80028	0.778866	4.87925	1.0649e-06	1.96098e-05	110260930	BEAN1	brain expressed associated with NEDD4 1 [Source:VGNC Symbol;Acc:VGNC:85797]
CvsSt	ENSSSCG00000033196	191.054	2.49521	0.570308	4.3752	1.21322e-05	0.000146306	110255675	MYORG	myogenesis regulating glycosidase (putative) [Source:HGNC Symbol;Acc:HGNC:19918]
CvsSt	ENSSSCG00000033235	103230	10.983	0.834721	13.1577	1.53758e-39	1.53636e-36	100621844	ENSSSCG00000033235
CvsSt	ENSSSCG00000033260	138.738	3.38274	0.742296	4.55713	5.18579e-06	7.25514e-05	606751	TNNI2	troponin I2, fast skeletal type [Source:VGNC Symbol;Acc:VGNC:94283]
CvsSt	ENSSSCG00000033307	11.8582	6.3663	1.56794	4.06029	4.90128e-05	0.000470302	102167388	ENSSSCG00000033307
CvsSt	ENSSSCG00000033323	19.0226	2.82423	0.801678	3.52289	0.000426864	0.00271856	780419	UBE2D1	ubiquitin conjugating enzyme E2 D1 [Source:VGNC Symbol;Acc:VGNC:94641]
CvsSt	ENSSSCG00000033355	10.133	4.31	1.58936	2.71178	0.00669225	0.0236496	100512015	LGI3	leucine rich repeat LGI family member 3 [Source:VGNC Symbol;Acc:VGNC:89700]
CvsSt	ENSSSCG00000033367	2800.07	5.41958	0.652271	8.30879	9.66828e-17	1.61011e-14	100737847	PLEKHA2	pleckstrin homology domain containing A2 [Source:VGNC Symbol;Acc:VGNC:95611]
CvsSt	ENSSSCG00000033381	74.2413	3.13195	0.920595	3.4021	0.000668712	0.00390751	100144625	IRF4	interferon regulatory factor 4 [Source:VGNC Symbol;Acc:VGNC:89207]
CvsSt	ENSSSCG00000033397	12.204	2.45996	0.924056	2.66213	0.00776486	0.0266527	100152456	KCNK9	potassium two pore domain channel subfamily K member 9 [Source:VGNC Symbol;Acc:VGNC:89375]
CvsSt	ENSSSCG00000033442	183.614	2.16403	0.690462	3.13418	0.00172337	0.0082747	100625160	HCN2	hyperpolarization activated cyclic nucleotide gated potassium and sodium channel 2 [Source:VGNC Symbol;Acc:VGNC:88803]
CvsSt	ENSSSCG00000033443	37.3656	2.48753	0.569403	4.36866	1.25014e-05	0.00014974	110261209	DEPDC1	DEP domain containing 1 [Source:VGNC Symbol;Acc:VGNC:87258]
CvsSt	ENSSSCG00000033444	28.127	2.53151	0.577009	4.3873	1.14768e-05	0.00013985	110259343	SPC24	SPC24 component of NDC80 kinetochore complex [Source:VGNC Symbol;Acc:VGNC:93393]
CvsSt	ENSSSCG00000033456	2620.54	3.69455	0.756278	4.88518	1.03336e-06	1.91399e-05	110261089	GPR157	G protein-coupled receptor 157 [Source:VGNC Symbol;Acc:VGNC:88611]
CvsSt	ENSSSCG00000033469	55.7316	2.32092	0.884692	2.62342	0.00870509	0.0291166
CvsSt	ENSSSCG00000033506	60.95	2.5922	0.79564	3.25801	0.00112197	0.00586954	102158168	KCTD21	potassium channel tetramerization domain containing 21 [Source:VGNC Symbol;Acc:VGNC:89400]
CvsSt	ENSSSCG00000033539	4121.3	3.17555	0.725761	4.37547	1.21169e-05	0.000146243	110261120	CRYBG2	crystallin beta-gamma domain containing 2 [Source:VGNC Symbol;Acc:VGNC:87019]
CvsSt	ENSSSCG00000033542	12.8178	3.58598	1.27292	2.81712	0.00484563	0.018432	100622306	VSTM1	V-set and transmembrane domain containing 1 [Source:VGNC Symbol;Acc:VGNC:98678]
CvsSt	ENSSSCG00000033590	8767.98	10.125	0.802223	12.6212	1.61403e-36	1.1349e-33	100271883	ENSSSCG00000033590	lymphocyte antigen 6 family member G6F [Source:NCBI gene (formerly Entrezgene);Acc:100271881]
CvsSt	ENSSSCG00000033606	50.4975	4.48626	0.92851	4.83167	1.35391e-06	2.38663e-05	110261483	H2AC6	H2A clustered histone 6 [Source:HGNC Symbol;Acc:HGNC:4733]
CvsSt	ENSSSCG00000033608	28.3913	6.49586	1.55425	4.17942	2.92256e-05	0.000306546	110256870	LOXL2	lysyl oxidase like 2 [Source:VGNC Symbol;Acc:VGNC:89781]
CvsSt	ENSSSCG00000033634	1079.53	2.33568	0.65262	3.57893	0.000344998	0.00229334	100623771	ERI1	exoribonuclease 1 [Source:VGNC Symbol;Acc:VGNC:97985]
CvsSt	ENSSSCG00000033682	569.342	11.6524	1.73394	6.7202	1.8147e-11	1.32e-09	110259396	CPLX2	complexin 2 [Source:VGNC Symbol;Acc:VGNC:86944]
CvsSt	ENSSSCG00000033728	6371.13	7.16656	0.910072	7.87472	3.41509e-15	4.87484e-13	100151890	FABP9	fatty acid binding protein 9 [Source:HGNC Symbol;Acc:HGNC:3563]
CvsSt	ENSSSCG00000033809	14.1563	4.51768	1.16704	3.87106	0.000108363	0.000901125	110259214	ENSSSCG00000033809	interferon induced transmembrane protein 10 [Source:VGNC Symbol;Acc:VGNC:89035]
CvsSt	ENSSSCG00000033830	13.0605	2.45584	0.680867	3.60693	0.000309838	0.00210533	100513356	CCDC8	coiled-coil domain containing 8 [Source:VGNC Symbol;Acc:VGNC:86314]
CvsSt	ENSSSCG00000033887	2677.37	8.43198	0.974824	8.64975	5.16132e-18	9.15773e-16	110261109	PLA2G2E	phospholipase A2 group IIE [Source:VGNC Symbol;Acc:VGNC:91492]
CvsSt	ENSSSCG00000033908	3.28374	4.63316	1.6211	2.85804	0.00426269	0.0166894
CvsSt	ENSSSCG00000033952	244.651	5.12331	0.832123	6.15692	7.41738e-10	3.48562e-08	100525468	ENSSSCG00000033952
CvsSt	ENSSSCG00000033958	69.494	3.03435	0.691876	4.38569	1.15619e-05	0.000140707	396888	RYR3	ryanodine receptor 3 [Source:HGNC Symbol;Acc:HGNC:10485]
CvsSt	ENSSSCG00000033997	37.7418	3.50386	0.830276	4.22011	2.44181e-05	0.000264536	110257542	ENSSSCG00000033997
CvsSt	ENSSSCG00000034062	2.5904	4.57943	1.9037	2.40554	0.0161485	0.0468704	100517268	SV2C	synaptic vesicle glycoprotein 2C [Source:VGNC Symbol;Acc:VGNC:93641]
CvsSt	ENSSSCG00000034064	15.2414	2.28718	0.750958	3.04569	0.0023215	0.0103898
CvsSt	ENSSSCG00000034114	144.05	4.98058	0.778914	6.39426	1.61325e-10	8.98167e-09	100153615	GPR68	G protein-coupled receptor 68 [Source:VGNC Symbol;Acc:VGNC:88635]
CvsSt	ENSSSCG00000034177	138.996	9.79652	1.75314	5.58799	2.29718e-08	7.30519e-07	102162785	ENSSSCG00000034177
CvsSt	ENSSSCG00000034191	45.33	3.27073	1.25977	2.59629	0.00942365	0.0308942	397173	SOX6	SRY-box transcription factor 6 [Source:VGNC Symbol;Acc:VGNC:93358]
CvsSt	ENSSSCG00000034219	45.7212	6.71699	1.8514	3.62806	0.000285559	0.00196853
CvsSt	ENSSSCG00000034223	9.5338	2.32043	0.971154	2.38936	0.0168779	0.0483152
CvsSt	ENSSSCG00000034257	2.6883	4.32787	1.68577	2.56729	0.0102497	0.0330149
CvsSt	ENSSSCG00000034259	968.214	3.00602	0.506338	5.93678	2.90678e-09	1.16425e-07	100144523	PMEPA1	prostate transmembrane protein, androgen induced 1 [Source:VGNC Symbol;Acc:VGNC:95606]
CvsSt	ENSSSCG00000034260	10.4481	4.95374	1.59235	3.11095	0.00186486	0.00877865	100379630	GDF15	growth differentiation factor 15 [Source:VGNC Symbol;Acc:VGNC:88399]
CvsSt	ENSSSCG00000034265	2062.12	2.34549	0.64087	3.65985	0.000252362	0.00178307	100152991	DESI1	desumoylating isopeptidase 1 [Source:VGNC Symbol;Acc:VGNC:87263]
CvsSt	ENSSSCG00000034293	546.506	3.05438	0.612956	4.98304	6.25935e-07	1.25352e-05	100514255	ARL4C	ADP ribosylation factor like GTPase 4C [Source:VGNC Symbol;Acc:VGNC:96419]
CvsSt	ENSSSCG00000034300	9.80249	4.52228	1.72477	2.62197	0.00874243	0.0292055	110261449	KNCN	kinocilin [Source:VGNC Symbol;Acc:VGNC:89555]
CvsSt	ENSSSCG00000034369	20.094	4.19337	1.05915	3.95919	7.5204e-05	0.000665617	100624014	SPSB4	splA/ryanodine receptor domain and SOCS box containing 4 [Source:VGNC Symbol;Acc:VGNC:93433]
CvsSt	ENSSSCG00000034390	13.5776	5.50275	1.84866	2.97661	0.00291459	0.0124671	110259837	CARD11	caspase recruitment domain family member 11 [Source:VGNC Symbol;Acc:VGNC:86186]
CvsSt	ENSSSCG00000034402	9.47428	3.62004	1.20728	2.99852	0.00271297	0.0117808	100154032	LRIT1	leucine rich repeat, Ig-like and transmembrane domains 1 [Source:VGNC Symbol;Acc:VGNC:89813]
CvsSt	ENSSSCG00000034500	2180.97	6.23878	0.720983	8.65317	5.00904e-18	9.05683e-16	110257220	MSX2	msh homeobox 2 [Source:VGNC Symbol;Acc:VGNC:90432]
CvsSt	ENSSSCG00000034501	3654.46	2.96134	0.645927	4.58464	4.54765e-06	6.51109e-05	110256447	RIOX2	ribosomal oxygenase 2 [Source:VGNC Symbol;Acc:VGNC:92318]
CvsSt	ENSSSCG00000034519	5986.33	4.6583	0.37106	12.554	3.77731e-36	2.56115e-33	110261638	SERPINB13	serpin family B member 13 [Source:VGNC Symbol;Acc:VGNC:92736]
CvsSt	ENSSSCG00000034528	596.35	8.79282	1.06647	8.24482	1.65407e-16	2.73066e-14	106506638	TGM6	transglutaminase 6 [Source:VGNC Symbol;Acc:VGNC:95803]
CvsSt	ENSSSCG00000034542	6436.35	9.18106	0.813374	11.2876	1.51062e-29	7.1698e-27	100523177	LYG2	lysozyme g2 [Source:HGNC Symbol;Acc:HGNC:29615]
CvsSt	ENSSSCG00000034615	61.17	3.2001	0.744401	4.29889	1.71653e-05	0.000197625	110259359	TNFAIP8L1	TNF alpha induced protein 8 like 1 [Source:VGNC Symbol;Acc:VGNC:94254]
CvsSt	ENSSSCG00000034653	711.49	4.75665	0.741852	6.41186	1.43753e-10	8.17109e-09	100517238	DLX4	distal-less homeobox 4 [Source:VGNC Symbol;Acc:VGNC:87340]
CvsSt	ENSSSCG00000034660	21.6705	4.21737	1.23514	3.41448	0.000639039	0.00377126	100623410	CCR4	C-C motif chemokine receptor 4 [Source:VGNC Symbol;Acc:VGNC:86371]
CvsSt	ENSSSCG00000034692	146.137	2.21838	0.544088	4.07723	4.5575e-05	0.000442352	110256943	SH3BP4	SH3 domain binding protein 4 [Source:VGNC Symbol;Acc:VGNC:95495]
CvsSt	ENSSSCG00000034701	48.8855	5.44165	1.05303	5.16761	2.37112e-07	5.50315e-06	100158118	CALY	calcyon neuron specific vesicular protein [Source:VGNC Symbol;Acc:VGNC:86152]
CvsSt	ENSSSCG00000034723	213.69	3.82996	0.770064	4.97356	6.57343e-07	1.30404e-05	100620951	PYCR1	pyrroline-5-carboxylate reductase 1 [Source:VGNC Symbol;Acc:VGNC:92018]
CvsSt	ENSSSCG00000034746	118.185	5.82094	1.07943	5.39263	6.94332e-08	1.87776e-06	100625563	CAPN8	calpain 8 [Source:VGNC Symbol;Acc:VGNC:95631]
CvsSt	ENSSSCG00000034756	7319.44	4.155	0.675044	6.15515	7.50042e-10	3.51594e-08	100519306	PLB1	phospholipase B1 [Source:VGNC Symbol;Acc:VGNC:91513]
CvsSt	ENSSSCG00000034765	10.8083	6.50391	1.67232	3.88917	0.000100589	0.000849881	100626687	PIEZO2	piezo type mechanosensitive ion channel component 2 [Source:HGNC Symbol;Acc:HGNC:26270]
CvsSt	ENSSSCG00000034827	2098.6	10.1561	0.931937	10.8978	1.18078e-27	4.87329e-25	102163757	CHP2	calcineurin like EF-hand protein 2 [Source:VGNC Symbol;Acc:VGNC:86658]
CvsSt	ENSSSCG00000034839	14.623	3.96733	1.281	3.09705	0.00195455	0.00909933
CvsSt	ENSSSCG00000034883	549.335	2.08443	0.272239	7.65661	1.90911e-14	2.43252e-12	100514767	AMIGO1	adhesion molecule with Ig like domain 1 [Source:VGNC Symbol;Acc:VGNC:85280]
CvsSt	ENSSSCG00000034914	31.2706	6.24561	2.21763	2.81634	0.00485745	0.0184437	100144477	ENSSSCG00000034914	CD163 molecule-like 1 [Source:NCBI gene (formerly Entrezgene);Acc:100144477]
CvsSt	ENSSSCG00000034948	962.263	2.13088	0.446965	4.76745	1.86572e-06	3.10708e-05	110260805	RASSF9	Ras association domain family member 9 [Source:VGNC Symbol;Acc:VGNC:92129]
CvsSt	ENSSSCG00000034987	18.5606	3.48019	0.886077	3.92764	8.57837e-05	0.000739938	110260413	IQANK1	IQ motif and ankyrin repeat containing 1 [Source:VGNC Symbol;Acc:VGNC:98813]
CvsSt	ENSSSCG00000034993	3510.97	2.32862	0.481659	4.83458	1.33428e-06	2.35925e-05	100037285	NREP	neuronal regeneration related protein [Source:HGNC Symbol;Acc:HGNC:16834]
CvsSt	ENSSSCG00000035059	469.649	2.74214	0.568941	4.81972	1.43757e-06	2.51469e-05	100626098	MCM10	minichromosome maintenance 10 replication initiation factor [Source:VGNC Symbol;Acc:VGNC:95871]
CvsSt	ENSSSCG00000035064	4.2518	4.65801	1.64032	2.83969	0.00451573	0.0174559	110260835	ENSSSCG00000035064
CvsSt	ENSSSCG00000035074	15.6932	2.27073	0.678626	3.34607	0.000819653	0.00455003	110261252	FOXO6	forkhead box O6 [Source:HGNC Symbol;Acc:HGNC:24814]
CvsSt	ENSSSCG00000035083	12.5751	2.54922	0.932025	2.73515	0.00623527	0.0223709	110257044	ENSSSCG00000035083
CvsSt	ENSSSCG00000035093	59.7734	2.92909	0.722641	4.05331	5.04982e-05	0.000481674	110258336	KIF26A	kinesin family member 26A [Source:VGNC Symbol;Acc:VGNC:89466]
CvsSt	ENSSSCG00000035124	804.661	5.27547	0.943627	5.59063	2.26246e-08	7.20684e-07	100514957	ILDR2	immunoglobulin like domain containing receptor 2 [Source:VGNC Symbol;Acc:VGNC:89118]
CvsSt	ENSSSCG00000035189	244.111	3.26146	0.490151	6.65399	2.85246e-11	1.96923e-09	100522166	ENSSSCG00000035189
CvsSt	ENSSSCG00000035222	17.6286	7.13322	1.53726	4.64022	3.48037e-06	5.21506e-05	100620211	CHST8	carbohydrate sulfotransferase 8 [Source:VGNC Symbol;Acc:VGNC:86682]
CvsSt	ENSSSCG00000035307	12.3282	2.87708	0.858032	3.35311	0.000799089	0.00446329	110258926	ENSSSCG00000035307
CvsSt	ENSSSCG00000035357	4742.41	2.03141	0.575351	3.53074	0.0004144	0.00265386	397536	BCL2L1	BCL2 like 1 [Source:VGNC Symbol;Acc:VGNC:96535]
CvsSt	ENSSSCG00000035366	6942.96	4.18911	0.727629	5.7572	8.55196e-09	3.07539e-07	100623863	MFHAS1	malignant fibrous histiocytoma amplified sequence 1 [Source:HGNC Symbol;Acc:HGNC:16982]
CvsSt	ENSSSCG00000035392	183.911	6.43778	0.984654	6.53812	6.2299e-11	3.87786e-09	397064	IGFBP2	insulin like growth factor binding protein 2 [Source:NCBI gene (formerly Entrezgene);Acc:397064]
CvsSt	ENSSSCG00000035402	3.70382	4.94206	1.88006	2.62868	0.00857174	0.0287822	102166057	RGS9	regulator of G protein signaling 9 [Source:VGNC Symbol;Acc:VGNC:92270]
CvsSt	ENSSSCG00000035409	16605.4	6.09986	0.82194	7.4213	1.15974e-13	1.26539e-11	110262184	ENSSSCG00000035409
CvsSt	ENSSSCG00000035445	238.436	5.28815	0.635612	8.31978	8.81288e-17	1.49386e-14	100518932	SEZ6	seizure related 6 homolog [Source:VGNC Symbol;Acc:VGNC:92767]
CvsSt	ENSSSCG00000035473	7.71394	4.43646	1.64947	2.68962	0.00715333	0.0249735	100621389	ENSSSCG00000035473
CvsSt	ENSSSCG00000035478	10971.9	2.23565	0.586878	3.80939	0.000139312	0.00110156	100516072	RMND5A	required for meiotic nuclear division 5 homolog A [Source:VGNC Symbol;Acc:VGNC:92336]
CvsSt	ENSSSCG00000035489	33.0831	2.25504	0.577049	3.90789	9.31069e-05	0.000793017	100624261	IFTAP	intraflagellar transport associated protein [Source:VGNC Symbol;Acc:VGNC:89053]
CvsSt	ENSSSCG00000035495	1101.8	5.81262	0.938449	6.19386	5.87095e-10	2.8005e-08	397509	KITLG	KIT ligand [Source:VGNC Symbol;Acc:VGNC:98061]
CvsSt	ENSSSCG00000035539	367.138	3.59961	0.761558	4.72664	2.28262e-06	3.70098e-05	641356	ST8SIA4	ST8 alpha-N-acetyl-neuraminide alpha-2,8-sialyltransferase 4 [Source:VGNC Symbol;Acc:VGNC:93519]
CvsSt	ENSSSCG00000035554	168.532	5.32378	0.979367	5.43594	5.45082e-08	1.51087e-06	100738576	LHFPL3	LHFPL tetraspan subfamily member 3 [Source:VGNC Symbol;Acc:VGNC:89706]
CvsSt	ENSSSCG00000035583	14.8198	3.26313	1.29717	2.51558	0.0118836	0.0370704	100520905	ENSSSCG00000035583
CvsSt	ENSSSCG00000035629	8.1169	2.65343	1.0109	2.62482	0.00866946	0.0290384	110260889	CA5A	carbonic anhydrase 5A [Source:VGNC Symbol;Acc:VGNC:86101]
CvsSt	ENSSSCG00000035649	23.8296	4.79865	1.10374	4.34761	1.37627e-05	0.000162895	396563	ENSSSCG00000035649	calcitonin-related polypeptide beta [Source:NCBI gene (formerly Entrezgene);Acc:396563]
CvsSt	ENSSSCG00000035731	21.4993	7.05728	1.69622	4.1606	3.17416e-05	0.000329297
CvsSt	ENSSSCG00000035760	327.695	2.62088	0.777132	3.3725	0.000744882	0.00424927	100158166	RFLNA	refilin A [Source:VGNC Symbol;Acc:VGNC:92238]
CvsSt	ENSSSCG00000035772	5.68383	4.91623	1.94927	2.52209	0.0116659	0.0364871	414737	CDH5	cadherin 5 [Source:VGNC Symbol;Acc:VGNC:86486]
CvsSt	ENSSSCG00000035833	42.3558	2.09485	0.669358	3.12963	0.00175025	0.0083741
CvsSt	ENSSSCG00000035859	341.104	2.43195	0.440297	5.52343	3.32442e-08	9.95491e-07	100627056	WNT5A	Wnt family member 5A [Source:VGNC Symbol;Acc:VGNC:94973]
CvsSt	ENSSSCG00000035891	10.1299	6.52624	1.58354	4.12131	3.76731e-05	0.000379026	110260204	ADGRB1	adhesion G protein-coupled receptor B1 [Source:VGNC Symbol;Acc:VGNC:85120]
CvsSt	ENSSSCG00000035924	9.78151	5.82595	1.55199	3.75387	0.000174128	0.00131917	110261060	SHISA7	shisa family member 7 [Source:VGNC Symbol;Acc:VGNC:92848]
CvsSt	ENSSSCG00000035952	21.8209	2.5983	0.594974	4.36709	1.25915e-05	0.000150429	100623028	TGFB1I1	transforming growth factor beta 1 induced transcript 1 [Source:VGNC Symbol;Acc:VGNC:93929]
CvsSt	ENSSSCG00000035971	224.781	2.39806	0.626885	3.82536	0.000130584	0.00104472	100622812	DUSP2	dual specificity phosphatase 2 [Source:VGNC Symbol;Acc:VGNC:87481]
CvsSt	ENSSSCG00000035987	5.70289	5.73998	1.87931	3.0543	0.00225583	0.0101606	100621933	EHD3	EH domain containing 3 [Source:VGNC Symbol;Acc:VGNC:87597]
CvsSt	ENSSSCG00000036029	140.026	2.06958	0.449935	4.59973	4.23042e-06	6.16382e-05	102164033	ENSSSCG00000036029	solute carrier family 26 member 10 [Source:VGNC Symbol;Acc:VGNC:93025]
CvsSt	ENSSSCG00000036036	401.898	2.16801	0.467947	4.63303	3.60354e-06	5.36996e-05
CvsSt	ENSSSCG00000036056	51.4457	2.11297	0.717339	2.94556	0.00322366	0.0135132	102163805	DNAH17	dynein axonemal heavy chain 17 [Source:VGNC Symbol;Acc:VGNC:87369]
CvsSt	ENSSSCG00000036065	3.61086	4.24447	1.59444	2.66205	0.00776663	0.0266528	110255871	ENSSSCG00000036065
CvsSt	ENSSSCG00000036130	19.3803	2.07994	0.829721	2.5068	0.012183	0.0377808
CvsSt	ENSSSCG00000036135	19.9456	3.23404	0.956115	3.38248	0.000718339	0.00413513	100738123	COL1A1	collagen type I alpha 1 chain [Source:VGNC Symbol;Acc:VGNC:86870]
CvsSt	ENSSSCG00000036152	216.063	6.28238	0.78147	8.03918	9.04396e-16	1.3736e-13	110256602	TSPAN15	tetraspanin 15 [Source:VGNC Symbol;Acc:VGNC:94504]
CvsSt	ENSSSCG00000036180	600.486	9.91304	1.31108	7.56097	4.00064e-14	4.77686e-12
CvsSt	ENSSSCG00000036183	9.60723	6.27257	1.56814	4	6.33438e-05	0.000577332	100737191	MCIDAS	multiciliate differentiation and DNA synthesis associated cell cycle protein [Source:VGNC Symbol;Acc:VGNC:90071]
CvsSt	ENSSSCG00000036239	2.56888	4.28485	1.68165	2.548	0.0108342	0.0344536	100736742	GJA8	gap junction protein alpha 8 [Source:VGNC Symbol;Acc:VGNC:88461]
CvsSt	ENSSSCG00000036247	28.6366	2.38461	0.514253	4.63704	3.53437e-06	5.2793e-05	100431099	ENSSSCG00000036247	mitochondrial rRNA methyltransferase 2 [Source:VGNC Symbol;Acc:VGNC:99722]
CvsSt	ENSSSCG00000036270	12.2137	6.5666	1.58992	4.13016	3.62514e-05	0.000366471	100522819	ATP6V1G3	ATPase H+ transporting V1 subunit G3 [Source:VGNC Symbol;Acc:VGNC:95878]
CvsSt	ENSSSCG00000036291	207.428	2.25012	0.489813	4.59383	4.35183e-06	6.28286e-05	100520198	ZNF576	zinc finger protein 576 [Source:VGNC Symbol;Acc:VGNC:98428]
CvsSt	ENSSSCG00000036307	28.3171	4.08997	0.832569	4.91247	8.99357e-07	1.69894e-05	100522940	OAF	out at first homolog [Source:VGNC Symbol;Acc:VGNC:91005]
CvsSt	ENSSSCG00000036322	84.3897	2.88707	0.668388	4.31946	1.56414e-05	0.000181914	100512891	SPRY4	sprouty RTK signaling antagonist 4 [Source:VGNC Symbol;Acc:VGNC:93427]
CvsSt	ENSSSCG00000036341	3.53511	5.09113	1.94336	2.61976	0.00879924	0.0293446	100624736	ENSSSCG00000036341
CvsSt	ENSSSCG00000036364	3.74086	5.13533	1.64204	3.12741	0.00176355	0.00840879	100516906	EGR4	early growth response 4 [Source:VGNC Symbol;Acc:VGNC:87592]
CvsSt	ENSSSCG00000036398	233.499	4.87099	1.00872	4.8289	1.37287e-06	2.4111e-05
CvsSt	ENSSSCG00000036435	55.3728	6.96111	2.11943	3.28442	0.00102192	0.00545741
CvsSt	ENSSSCG00000036438	4423.1	4.52989	0.689531	6.56952	5.04766e-11	3.20501e-09	396598	GPX3	glutathione peroxidase 3 [Source:VGNC Symbol;Acc:VGNC:98026]
CvsSt	ENSSSCG00000036441	847.619	6.97631	0.886808	7.86677	3.63929e-15	5.15612e-13	100151890	PMP2	peripheral myelin protein 2 [Source:NCBI gene (formerly Entrezgene);Acc:100151890]
CvsSt	ENSSSCG00000036452	7.43162	3.47386	1.30977	2.65226	0.00799546	0.0272471	100737774	LRRC17	leucine rich repeat containing 17 [Source:VGNC Symbol;Acc:VGNC:89828]
CvsSt	ENSSSCG00000036487	223.878	6.7256	1.01136	6.65007	2.92948e-11	2.00058e-09	110256282	ENSSSCG00000036487
CvsSt	ENSSSCG00000036503	30.3009	2.41432	0.916756	2.63355	0.00844969	0.028463	100522830	RAB6B	RAB6B, member RAS onco family [Source:VGNC Symbol;Acc:VGNC:98272]
CvsSt	ENSSSCG00000036504	5894.78	3.1619	0.733429	4.31112	1.62429e-05	0.000188031	100513737	PLA2G2F	phospholipase A2 group IIF [Source:VGNC Symbol;Acc:VGNC:91493]
CvsSt	ENSSSCG00000036549	971.583	2.23138	0.577408	3.86447	0.000111329	0.000921756	100525453	DPYSL3	dihydropyrimidinase like 3 [Source:VGNC Symbol;Acc:VGNC:87431]
CvsSt	ENSSSCG00000036645	68.3571	3.91771	0.666866	5.87481	4.23329e-09	1.6302e-07	100625223	PDE6B	phosphodiesterase 6B [Source:VGNC Symbol;Acc:VGNC:91259]
CvsSt	ENSSSCG00000036706	42.0056	7.07176	1.59722	4.42753	9.53179e-06	0.000119762	110257399	SRMS	src-related kinase lacking C-terminal regulatory tyrosine and N-terminal myristylation sites [Source:VGNC Symbol;Acc:VGNC:95517]
CvsSt	ENSSSCG00000036746	148.108	2.3024	0.637658	3.61071	0.000305364	0.00207864	100516934	RASL10B	RAS like family 10 member B [Source:VGNC Symbol;Acc:VGNC:92118]
CvsSt	ENSSSCG00000036755	803.443	2.74025	0.660174	4.15081	3.31307e-05	0.000340545	100511570	TENT5B	terminal nucleotidyltransferase 5B [Source:VGNC Symbol;Acc:VGNC:93874]
CvsSt	ENSSSCG00000036766	3567.02	2.32303	0.768985	3.0209	0.00252024	0.0111117	100519567	SLC49A4	solute carrier family 49 member 4 [Source:VGNC Symbol;Acc:VGNC:96597]
CvsSt	ENSSSCG00000036770	226.614	3.11612	0.647936	4.8093	1.51456e-06	2.62106e-05	100568453	GPRIN2	G protein regulated inducer of neurite outgrowth 2 [Source:NCBI gene (formerly Entrezgene);Acc:100568453]
CvsSt	ENSSSCG00000036776	286.725	3.49906	1.01733	3.43945	0.000582902	0.00350313	100626706	LRRC75A	leucine rich repeat containing 75A [Source:VGNC Symbol;Acc:VGNC:89857]
CvsSt	ENSSSCG00000036791	102.952	5.43712	0.877191	6.19833	5.70641e-10	2.74269e-08	110260666	KRT78	keratin 78 [Source:VGNC Symbol;Acc:VGNC:89594]
CvsSt	ENSSSCG00000036883	63.3561	2.07957	0.494432	4.20597	2.59959e-05	0.000278299	399532	FABP3	fatty acid binding protein 3 [Source:NCBI gene (formerly Entrezgene);Acc:399532]
CvsSt	ENSSSCG00000036884	9.88435	3.6365	1.14683	3.17091	0.00151961	0.00749346
CvsSt	ENSSSCG00000036932	18.744	7.32931	1.5571	4.70702	2.5137e-06	4.01138e-05	100622044	WNT6	Wnt family member 6 [Source:VGNC Symbol;Acc:VGNC:95569]
CvsSt	ENSSSCG00000036948	60.6836	3.30459	0.677835	4.87521	1.08694e-06	1.99437e-05	102167611	ENSSSCG00000036948	immunoglobulin like and fibronectin type III domain containing 1 [Source:VGNC Symbol;Acc:VGNC:96049]
CvsSt	ENSSSCG00000036954	1962.89	2.08616	0.624347	3.34135	0.000833735	0.00462145	100158004	MORN4	MORN repeat containing 4 [Source:VGNC Symbol;Acc:VGNC:90310]
CvsSt	ENSSSCG00000036987	1584.46	8.24782	0.820075	10.0574	8.52209e-24	2.74224e-21	110256011	KRT40	keratin 40 [Source:VGNC Symbol;Acc:VGNC:89592]
CvsSt	ENSSSCG00000036990	5.96246	5.41278	1.66636	3.24826	0.00116114	0.00603457	414378	DIO3	iodothyronine deiodinase 3 [Source:VGNC Symbol;Acc:VGNC:87305]
CvsSt	ENSSSCG00000037039	5.57178	4.10914	1.51094	2.71959	0.00653636	0.0232079	110255937	PPP1R27	protein phosphatase 1 regulatory subunit 27 [Source:VGNC Symbol;Acc:VGNC:91731]
CvsSt	ENSSSCG00000037044	9.44023	4.66039	1.60303	2.90724	0.00364638	0.0148173	100738818	NME9	NME/NM23 family member 9 [Source:VGNC Symbol;Acc:VGNC:90796]
CvsSt	ENSSSCG00000037065	12284.2	2.59947	0.550889	4.71869	2.37366e-06	3.82872e-05	100739825	EMP2	epithelial membrane protein 2 [Source:VGNC Symbol;Acc:VGNC:87689]
CvsSt	ENSSSCG00000037128	50355.1	10.6701	0.869626	12.2697	1.31667e-34	8.06355e-32	100625858	ENSSSCG00000037128
CvsSt	ENSSSCG00000037132	98.0079	2.49746	0.340133	7.34259	2.095e-13	2.14992e-11	397105	POU2F2	POU class 2 homeobox 2 [Source:VGNC Symbol;Acc:VGNC:91673]
CvsSt	ENSSSCG00000037168	86.0186	6.98902	1.3184	5.30114	1.15084e-07	2.93664e-06	100515686	TMEM92	transmembrane protein 92 [Source:VGNC Symbol;Acc:VGNC:94217]
CvsSt	ENSSSCG00000037222	1350.19	9.19052	0.969216	9.48242	2.48442e-21	6.37388e-19	106508044	ENSSSCG00000037222
CvsSt	ENSSSCG00000037232	1124.1	2.35136	0.553497	4.2482	2.155e-05	0.000238279	100626399	SNX29	sorting nexin 29 [Source:VGNC Symbol;Acc:VGNC:98331]
CvsSt	ENSSSCG00000037270	60.6845	2.81913	0.840318	3.35483	0.000794129	0.00445275	606747	DYNLT4	dynein light chain Tctex-type 4 [Source:VGNC Symbol;Acc:VGNC:98652]
CvsSt	ENSSSCG00000037284	1492.31	3.09943	0.67237	4.60971	4.03224e-06	5.91136e-05	100512614	CCDC85C	coiled-coil domain containing 85C [Source:VGNC Symbol;Acc:VGNC:86322]
CvsSt	ENSSSCG00000037371	249.042	2.59612	0.731134	3.55081	0.000384043	0.00249803	110256563	TMPPE	transmembrane protein with metallophosphoesterase domain [Source:VGNC Symbol;Acc:VGNC:94230]
CvsSt	ENSSSCG00000037389	123.33	9.90174	1.64645	6.01401	1.80989e-09	7.68699e-08
CvsSt	ENSSSCG00000037416	113.513	2.69945	0.670168	4.02803	5.62473e-05	0.000522946	100154589	CLIC5	chloride intracellular channel 5 [Source:VGNC Symbol;Acc:VGNC:86764]
CvsSt	ENSSSCG00000037478	37.2456	3.44786	0.844803	4.08125	4.47933e-05	0.000436327	100511153	PRR29	proline rich 29 [Source:VGNC Symbol;Acc:VGNC:91857]
CvsSt	ENSSSCG00000037514	306.547	3.34727	0.650913	5.14242	2.71216e-07	6.15177e-06	100620374	ENSSSCG00000037514
CvsSt	ENSSSCG00000037527	125.436	7.67322	1.33939	5.72889	1.0109e-08	3.5475e-07	100624856	CPLX1	complexin 1 [Source:VGNC Symbol;Acc:VGNC:86943]
CvsSt	ENSSSCG00000037539	103.385	4.34504	0.674425	6.44259	1.17455e-10	6.8612e-09	102159930	SORCS2	sortilin related VPS10 domain containing receptor 2 [Source:VGNC Symbol;Acc:VGNC:93340]
CvsSt	ENSSSCG00000037565	37.8973	3.0191	0.777083	3.88517	0.000102257	0.000859768	574051	H1-2	H1.2 linker histone, cluster member [Source:NCBI gene (formerly Entrezgene);Acc:574051]
CvsSt	ENSSSCG00000037569	12686.2	11.8019	1.05111	11.228	2.97069e-29	1.37557e-26	100517674	ENSSSCG00000037569
CvsSt	ENSSSCG00000037583	78.8067	2.13649	0.604878	3.53209	0.000412283	0.00264585	100524280	GNB4	G protein subunit beta 4 [Source:VGNC Symbol;Acc:VGNC:88533]
CvsSt	ENSSSCG00000037591	1407.63	3.63	0.659474	5.50439	3.70441e-08	1.09716e-06	100520351	AMMECR1	AMMECR nuclear protein 1 [Source:VGNC Symbol;Acc:VGNC:96559]
CvsSt	ENSSSCG00000037642	309.937	4.43529	0.6748	6.57274	4.93968e-11	3.14697e-09	100622803	ARID3A	AT-rich interaction domain 3A [Source:VGNC Symbol;Acc:VGNC:85507]
CvsSt	ENSSSCG00000037645	184.8	2.77406	0.404617	6.856	7.0813e-12	5.53244e-10	100621773	ENSSSCG00000037645
CvsSt	ENSSSCG00000037673	396.703	2.08652	0.335261	6.22357	4.85982e-10	2.36573e-08	100625875	BFAR	bifunctional apoptosis regulator [Source:VGNC Symbol;Acc:VGNC:85809]
CvsSt	ENSSSCG00000037791	305.019	2.39912	0.778347	3.08232	0.00205391	0.00945527	110257348	ENSSSCG00000037791	NKD inhibitor of WNT signaling pathway 2 [Source:VGNC Symbol;Acc:VGNC:90760]
CvsSt	ENSSSCG00000037821	567.115	8.64324	1.15793	7.4644	8.36779e-14	9.40015e-12	397640	RGS5	regulator of G protein signaling 5 [Source:VGNC Symbol;Acc:VGNC:98844]
CvsSt	ENSSSCG00000037846	39.7995	5.46862	1.46031	3.74484	0.000180507	0.00135344	100520554	ACOXL	acyl-CoA oxidase like [Source:VGNC Symbol;Acc:VGNC:85023]
CvsSt	ENSSSCG00000037852	36.9747	2.75634	0.997408	2.7635	0.00571847	0.0209303
CvsSt	ENSSSCG00000037859	7.30181	5.70002	1.64161	3.47222	0.000516175	0.00317036
CvsSt	ENSSSCG00000037862	13.0361	5.1772	1.96795	2.63076	0.0085194	0.0286528
CvsSt	ENSSSCG00000037898	923.086	2.03915	0.513732	3.96929	7.20868e-05	0.000641616	100524854	CXXC5	CXXC finger protein 5 [Source:VGNC Symbol;Acc:VGNC:87118]
CvsSt	ENSSSCG00000037918	2574.84	4.35708	0.717008	6.07674	1.22648e-09	5.42767e-08	100154721	ADIRF	adiposis regulatory factor [Source:VGNC Symbol;Acc:VGNC:85142]
CvsSt	ENSSSCG00000037951	493.654	2.76473	0.534701	5.1706	2.33344e-07	5.43563e-06	110256671	ZNF891	zinc finger protein 891 [Source:VGNC Symbol;Acc:VGNC:98430]
CvsSt	ENSSSCG00000037954	10.4434	6.33989	1.57808	4.01747	5.88265e-05	0.000543201	100620754	CAVIN4	caveolae associated protein 4 [Source:VGNC Symbol;Acc:VGNC:86219]
CvsSt	ENSSSCG00000037987	24.8022	7.83895	1.79142	4.37583	1.20974e-05	0.0001461	102163819	MS4A10	membrane spanning 4-domains A10 [Source:VGNC Symbol;Acc:VGNC:90407]
CvsSt	ENSSSCG00000038013	386.624	2.62465	0.641987	4.08832	4.34506e-05	0.000426423	100515818	DIRAS1	DIRAS family GTPase 1 [Source:VGNC Symbol;Acc:VGNC:87312]
CvsSt	ENSSSCG00000038036	30.0141	3.62966	0.963873	3.7657	0.000166081	0.00127037	100152823	TTLL11	tubulin tyrosine ligase like 11 [Source:HGNC Symbol;Acc:HGNC:18113]
CvsSt	ENSSSCG00000038038	98.5259	3.54393	0.662845	5.34655	8.96475e-08	2.35402e-06	100518006	SBK1	SH3 domain binding kinase 1 [Source:VGNC Symbol;Acc:VGNC:92595]
CvsSt	ENSSSCG00000038043	273.231	2.6702	0.711204	3.75448	0.0001737	0.00131645	110261043	ENSSSCG00000038043
CvsSt	ENSSSCG00000038114	59913.5	11.2181	0.853896	13.1375	2.00755e-39	1.90567e-36
CvsSt	ENSSSCG00000038121	44545.3	9.80425	0.908871	10.7873	3.95313e-27	1.55234e-24
CvsSt	ENSSSCG00000038128	138.121	4.30665	0.900788	4.78098	1.74441e-06	2.94706e-05	100627470	CDYL2	chromodomain Y like 2 [Source:VGNC Symbol;Acc:VGNC:86529]
CvsSt	ENSSSCG00000038131	138548	10.8842	0.763918	14.2478	4.6239e-46	6.82776e-43	100626583	KRTAP11-1	keratin associated protein 11-1 [Source:VGNC Symbol;Acc:VGNC:89600]
CvsSt	ENSSSCG00000038149	4.81807	5.52517	1.89998	2.90802	0.00363725	0.0147897	397167	KCNE4	potassium voltage-gated channel subfamily E regulatory subunit 4 [Source:VGNC Symbol;Acc:VGNC:96387]
CvsSt	ENSSSCG00000038150	82.1277	2.29352	0.462655	4.95729	7.14828e-07	1.39907e-05
CvsSt	ENSSSCG00000038190	1041.61	3.94755	0.714375	5.52587	3.27856e-08	9.86427e-07	100154490	MPST	mercaptopyruvate sulfurtransferase [Source:VGNC Symbol;Acc:VGNC:90332]
CvsSt	ENSSSCG00000038215	33.3992	5.66956	1.85047	3.06384	0.00218515	0.00992	100517188	ENSSSCG00000038215
CvsSt	ENSSSCG00000038320	673.423	2.01516	0.679977	2.96358	0.00304086	0.0129065	100170114	POR	P450 (cytochrome) oxidoreductase [Source:NCBI gene (formerly Entrezgene);Acc:100170114]
CvsSt	ENSSSCG00000038441	101.047	6.12365	1.05066	5.82836	5.59753e-09	2.10018e-07
CvsSt	ENSSSCG00000038452	60.1749	4.00653	0.645736	6.2046	5.4837e-10	2.64906e-08	102160867	ADAMTS17	ADAM metallopeptidase with thrombospondin type 1 motif 17 [Source:VGNC Symbol;Acc:VGNC:85079]
CvsSt	ENSSSCG00000038460	11.3358	3.5863	1.11025	3.23018	0.00123714	0.00634099	106510450	FOXF1	forkhead box F1 [Source:VGNC Symbol;Acc:VGNC:88204]
CvsSt	ENSSSCG00000038475	262.193	2.60468	0.516468	5.04326	4.57655e-07	9.63257e-06	100157017	ENSSSCG00000038475
CvsSt	ENSSSCG00000038478	1276.68	2.28633	0.447223	5.11229	3.18274e-07	7.04247e-06	100624283	HEATR6	HEAT repeat containing 6 [Source:VGNC Symbol;Acc:VGNC:88828]
CvsSt	ENSSSCG00000038521	48480.5	10.1312	1.11358	9.09782	9.21655e-20	2.01122e-17	100524723	CHAC1	ChaC glutathione specific gamma-glutamylcyclotransferase 1 [Source:VGNC Symbol;Acc:VGNC:86619]
CvsSt	ENSSSCG00000038543	40.6275	3.35145	0.802497	4.17627	2.96325e-05	0.000310471	100513079	CENPA	centromere protein A [Source:VGNC Symbol;Acc:VGNC:86545]
CvsSt	ENSSSCG00000038578	10.8882	6.50634	1.95484	3.32833	0.000873683	0.00479944	110257480	HRH3	histamine receptor H3 [Source:VGNC Symbol;Acc:VGNC:96360]
CvsSt	ENSSSCG00000038590	39.3385	3.30916	0.894723	3.69853	0.000216851	0.00157857	104796108	ssc-mir-9838	ssc-mir-9838 [Source:miRBase;Acc:MI0031607]
CvsSt	ENSSSCG00000038605	110.861	9.87926	1.55444	6.35552	2.07724e-10	1.11402e-08
CvsSt	ENSSSCG00000038618	17.6583	3.14858	1.02905	3.0597	0.00221557	0.0100244	100524216	RFLNB	refilin B [Source:VGNC Symbol;Acc:VGNC:92239]
CvsSt	ENSSSCG00000038627	38.6931	3.82584	0.903904	4.23257	2.31031e-05	0.000252076	102167408	ADAMTS18	ADAM metallopeptidase with thrombospondin type 1 motif 18 [Source:VGNC Symbol;Acc:VGNC:85080]
CvsSt	ENSSSCG00000038763	1145.25	2.98376	0.548289	5.44195	5.26991e-08	1.467e-06	110260834	CERK	ceramide kinase [Source:VGNC Symbol;Acc:VGNC:86586]
CvsSt	ENSSSCG00000038811	329.636	3.8787	0.619995	6.25602	3.94917e-10	1.98873e-08	100516148	MOB3B	MOB kinase activator 3B [Source:VGNC Symbol;Acc:VGNC:96024]
CvsSt	ENSSSCG00000038902	3069.46	2.05414	0.495268	4.14753	3.36075e-05	0.000344699	100514651	KCNK6	potassium two pore domain channel subfamily K member 6 [Source:VGNC Symbol;Acc:VGNC:89373]
CvsSt	ENSSSCG00000038913	6056.92	2.25685	0.476143	4.73986	2.13871e-06	3.49727e-05	102167519	HERC4	HECT and RLD domain containing E3 ubiquitin protein ligase 4 [Source:HGNC Symbol;Acc:HGNC:24521]
CvsSt	ENSSSCG00000038949	35.7449	7.93738	1.79958	4.41068	1.03045e-05	0.00012803	100739447	NALCN	sodium leak channel, non-selective [Source:VGNC Symbol;Acc:VGNC:90572]
CvsSt	ENSSSCG00000038956	126.367	4.489	0.692534	6.48199	9.05223e-11	5.42134e-09	100518256	HEYL	hes related family bHLH transcription factor with YRPW motif like [Source:VGNC Symbol;Acc:VGNC:88865]
CvsSt	ENSSSCG00000038970	14.2622	3.18888	0.81573	3.90924	9.25873e-05	0.000788945	100517031	BCL2L15	BCL2 like 15 [Source:VGNC Symbol;Acc:VGNC:85783]
CvsSt	ENSSSCG00000039008	39698.3	10.9105	0.897447	12.1572	5.25236e-34	3.0217e-31
CvsSt	ENSSSCG00000039013	27.3947	7.90739	1.79606	4.40264	1.06942e-05	0.000131837	110255930	NOTUM	notum, palmitoleoyl-protein carboxylesterase [Source:VGNC Symbol;Acc:VGNC:90826]
CvsSt	ENSSSCG00000039030	3695.51	11.5777	1.31131	8.82911	1.05509e-18	1.94475e-16
CvsSt	ENSSSCG00000039053	62.351	4.78903	1.08478	4.41474	1.0113e-05	0.000126147	110259887	VGF	VGF nerve growth factor inducible [Source:VGNC Symbol;Acc:VGNC:94820]
CvsSt	ENSSSCG00000039057	11.6188	4.06501	1.13077	3.59492	0.000324491	0.00218456	100516260	ALKAL2	ALK and LTK ligand 2 [Source:VGNC Symbol;Acc:VGNC:85256]
CvsSt	ENSSSCG00000039074	26.2107	4.83971	1.31179	3.6894	0.000224783	0.0016282	110260624	TNFRSF13C	TNF receptor superfamily member 13C [Source:VGNC Symbol;Acc:VGNC:94260]
CvsSt	ENSSSCG00000039135	97.1256	2.0115	0.502354	4.00414	6.22425e-05	0.000569207	100520910	ARHGAP33	Rho GTPase activating protein 33 [Source:VGNC Symbol;Acc:VGNC:85472]
CvsSt	ENSSSCG00000039169	26.6603	6.05904	1.74341	3.47539	0.000510117	0.0031423	110255508	CER1	cerberus 1, DAN family BMP antagonist [Source:VGNC Symbol;Acc:VGNC:86584]
CvsSt	ENSSSCG00000039236	660.37	4.31941	0.798221	5.4113	6.25696e-08	1.70919e-06	110259378	FGF22	fibroblast growth factor 22 [Source:VGNC Symbol;Acc:VGNC:88110]
CvsSt	ENSSSCG00000039249	27584.3	2.91208	0.653809	4.45402	8.42789e-06	0.00010811	100156975	ENSSSCG00000039249
CvsSt	ENSSSCG00000039271	30.5897	7.35899	1.94363	3.78621	0.000152959	0.00118916	100158046	ST8SIA2	ST8 alpha-N-acetyl-neuraminide alpha-2,8-sialyltransferase 2 [Source:VGNC Symbol;Acc:VGNC:93517]
CvsSt	ENSSSCG00000039286	25.1313	4.22456	1.07619	3.92547	8.65614e-05	0.000744616
CvsSt	ENSSSCG00000039316	29.2112	5.88162	1.79285	3.28059	0.0010359	0.00551968	100513795	GSG1	germ cell associated 1 [Source:VGNC Symbol;Acc:VGNC:88721]
CvsSt	ENSSSCG00000039337	9.82423	4.99082	1.57122	3.1764	0.00149113	0.00738177	110259918	ITPRIPL2	ITPRIP like 2 [Source:VGNC Symbol;Acc:VGNC:89258]
CvsSt	ENSSSCG00000039342	6.76743	2.60885	0.992161	2.62946	0.00855212	0.0287315	100625977	DNAI1	dynein axonemal intermediate chain 1 [Source:HGNC Symbol;Acc:HGNC:2954]
CvsSt	ENSSSCG00000039348	11099.1	2.12173	0.695404	3.05107	0.00228024	0.0102438	100510904	H1-0	H1.0 linker histone [Source:HGNC Symbol;Acc:HGNC:4714]
CvsSt	ENSSSCG00000039370	54.2391	2.84268	0.557384	5.10004	3.39581e-07	7.47905e-06	106504942	ENSSSCG00000039370
CvsSt	ENSSSCG00000039395	108.839	2.1978	0.637471	3.44768	0.000565421	0.0034132	100516757	GAS2L2	growth arrest specific 2 like 2 [Source:VGNC Symbol;Acc:VGNC:88356]
CvsSt	ENSSSCG00000039472	5243.18	2.39233	0.399357	5.99047	2.09241e-09	8.74986e-08	503660	SLC30A1	solute carrier family 30 member 1 [Source:VGNC Symbol;Acc:VGNC:93055]
CvsSt	ENSSSCG00000039486	4.67121	4.88217	1.62366	3.0069	0.00263931	0.0115295	100737395	DIPK1C	divergent protein kinase domain 1C [Source:VGNC Symbol;Acc:VGNC:87309]
CvsSt	ENSSSCG00000039487	90.4959	2.02081	0.458931	4.4033	1.06616e-05	0.00013152	110258076	GPSM1	G protein signaling modulator 1 [Source:VGNC Symbol;Acc:VGNC:88648]
CvsSt	ENSSSCG00000039498	15.2877	5.53652	1.63107	3.39442	0.000687751	0.00399784	110256156	RBFOX3	RNA binding fox-1 homolog 3 [Source:VGNC Symbol;Acc:VGNC:92141]
CvsSt	ENSSSCG00000039522	718.558	6.5928	1.15093	5.72826	1.01465e-08	3.5541e-07	100522865	SHISAL1	shisa like 1 [Source:VGNC Symbol;Acc:VGNC:92850]
CvsSt	ENSSSCG00000039535	5.56176	3.09603	1.20696	2.56515	0.010313	0.0331347	100516166	CAMK2B	calcium/calmodulin dependent protein kinase II beta [Source:VGNC Symbol;Acc:VGNC:86156]
CvsSt	ENSSSCG00000039553	135.061	2.56896	0.604422	4.25027	2.13512e-05	0.000236357	110258353	ASPG	asparaginase [Source:VGNC Symbol;Acc:VGNC:85583]
CvsSt	ENSSSCG00000039561	8.17518	5.85583	1.63933	3.57209	0.00035415	0.00234025
CvsSt	ENSSSCG00000039651	61.5264	3.42566	0.941935	3.63683	0.000276011	0.00191453	100625876	SLC2A5	solute carrier family 2 member 5 [Source:VGNC Symbol;Acc:VGNC:93050]
CvsSt	ENSSSCG00000039658	11345.2	3.99384	0.658303	6.06687	1.30424e-09	5.69217e-08	102160196	ENSSSCG00000039658
CvsSt	ENSSSCG00000039673	9.1321	3.81265	1.17332	3.24945	0.00115627	0.00601584	100514598	ASB16	ankyrin repeat and SOCS box containing 16 [Source:VGNC Symbol;Acc:VGNC:98974]
CvsSt	ENSSSCG00000039677	3.34491	4.91313	1.71985	2.85673	0.00428029	0.0167463	110257409	CHRNA4	cholinergic receptor nicotinic alpha 4 subunit [Source:VGNC Symbol;Acc:VGNC:95915]
CvsSt	ENSSSCG00000039704	104.521	2.13579	0.721621	2.95972	0.00307922	0.0130227
CvsSt	ENSSSCG00000039712	11.9476	6.30777	1.83552	3.4365	0.000589277	0.00352693	100739557	ENSSSCG00000039712
CvsSt	ENSSSCG00000039784	337.834	9.1199	1.34625	6.77432	1.24989e-11	9.37912e-10
CvsSt	ENSSSCG00000039792	3.32807	4.84733	1.64895	2.93965	0.00328582	0.0136999	100523279	ENSSSCG00000039792
CvsSt	ENSSSCG00000039797	2116.65	2.94074	0.539357	5.45232	4.97182e-08	1.39837e-06	100626308	APCDD1	APC down-regulated 1 [Source:VGNC Symbol;Acc:VGNC:85406]
CvsSt	ENSSSCG00000039815	103.675	2.34873	0.608328	3.86096	0.000112941	0.000933064	100517809	ENSSSCG00000039815
CvsSt	ENSSSCG00000039836	88.024	8.22372	1.75119	4.69607	2.65221e-06	4.17514e-05	102160031	ENSSSCG00000039836
CvsSt	ENSSSCG00000039867	284.307	2.17654	0.355211	6.12745	8.93008e-10	4.14517e-08	110260302	UCK2	uridine-cytidine kinase 2 [Source:VGNC Symbol;Acc:VGNC:98399]
CvsSt	ENSSSCG00000039875	336.726	7.94495	1.07588	7.38459	1.52927e-13	1.62197e-11	100626194	NKD1	NKD inhibitor of WNT signaling pathway 1 [Source:VGNC Symbol;Acc:VGNC:90759]
CvsSt	ENSSSCG00000039909	2400.93	2.32499	0.607195	3.82907	0.000128629	0.00103432	100510978	ICAM2	intercellular adhesion molecule 2 [Source:NCBI gene (formerly Entrezgene);Acc:414387]
CvsSt	ENSSSCG00000039927	117403	11.1661	0.826387	13.5119	1.32971e-41	1.57779e-38	110256008	ENSSSCG00000039927
CvsSt	ENSSSCG00000039966	67.193	2.00758	0.47379	4.23728	2.26243e-05	0.000247706	100626804	NXPH4	neurexophilin 4 [Source:VGNC Symbol;Acc:VGNC:91000]
CvsSt	ENSSSCG00000039986	244.28	4.43065	0.863634	5.13024	2.89375e-07	6.48617e-06	100623553	RGS8	regulator of G protein signaling 8 [Source:VGNC Symbol;Acc:VGNC:92269]
CvsSt	ENSSSCG00000040003	216.244	2.52438	0.661392	3.81676	0.000135213	0.00107317	110258063	UAP1L1	UDP-N-acetylglucosamine pyrophosphorylase 1 like 1 [Source:VGNC Symbol;Acc:VGNC:94627]
CvsSt	ENSSSCG00000040053	198.633	4.82279	0.659815	7.30931	2.68524e-13	2.69731e-11	100519992	LSMEM1	leucine rich single-pass membrane protein 1 [Source:VGNC Symbol;Acc:VGNC:89878]
CvsSt	ENSSSCG00000040147	17.2193	6.50763	1.5594	4.17318	3.00382e-05	0.000313855	100621918	SHISA3	shisa family member 3 [Source:VGNC Symbol;Acc:VGNC:92846]
CvsSt	ENSSSCG00000040155	7.17151	3.28799	1.19271	2.75674	0.00583807	0.0212599
CvsSt	ENSSSCG00000040162	576.487	2.15986	0.695279	3.10646	0.00189341	0.0088888	110260086	NUPR1	nuclear protein 1, transcriptional regulator [Source:VGNC Symbol;Acc:VGNC:90989]
CvsSt	ENSSSCG00000040173	53.4215	8.65212	1.56007	5.54598	2.92311e-08	9.00897e-07	100623214	DLGAP3	DLG associated protein 3 [Source:VGNC Symbol;Acc:VGNC:87331]
CvsSt	ENSSSCG00000040177	122.305	5.51482	0.880301	6.2647	3.73546e-10	1.91153e-08	100628008	ASIC2	acid sensing ion channel subunit 2 [Source:VGNC Symbol;Acc:VGNC:97893]
CvsSt	ENSSSCG00000040260	7.55063	2.08307	0.814258	2.55825	0.0105201	0.033669	110259862	ENSSSCG00000040260
CvsSt	ENSSSCG00000040266	3.30089	4.50508	1.6428	2.74232	0.00610075	0.0220127	102167462	MDFIC2	MyoD family inhibitor domain containing 2 [Source:VGNC Symbol;Acc:VGNC:90090]
CvsSt	ENSSSCG00000040349	11.4855	5.26571	2.02189	2.60435	0.00920483	0.0303901	100515172	HOXD8	homeobox D8 [Source:VGNC Symbol;Acc:VGNC:96356]
CvsSt	ENSSSCG00000040355	196.591	3.28637	0.615696	5.33764	9.41627e-08	2.45898e-06	100154672	TICRR	TOPBP1 interacting checkpoint and replication regulator [Source:VGNC Symbol;Acc:VGNC:93977]
CvsSt	ENSSSCG00000040359	6550.67	5.5263	0.715937	7.71898	1.1726e-14	1.55677e-12	102162220	GOLGA7B	golgin A7 family member B [Source:VGNC Symbol;Acc:VGNC:88553]
CvsSt	ENSSSCG00000040397	8.24975	2.3718	0.929026	2.553	0.01068	0.0340771	102166764	COLEC12	collectin subfamily member 12 [Source:VGNC Symbol;Acc:VGNC:96956]
CvsSt	ENSSSCG00000040405	6.59806	2.52871	1.01801	2.48397	0.0129927	0.039657	110255818	SERP2	stress associated endoplasmic reticulum protein family member 2 [Source:VGNC Symbol;Acc:VGNC:92732]
CvsSt	ENSSSCG00000040410	7.09102	5.69225	1.54805	3.67705	0.000235945	0.00168779	102167043	EXOC3L2	exocyst complex component 3 like 2 [Source:VGNC Symbol;Acc:VGNC:87828]
CvsSt	ENSSSCG00000040466	20.7403	7.17741	1.62342	4.42116	9.81726e-06	0.000122835
CvsSt	ENSSSCG00000040556	89.6857	2.00751	0.568703	3.52998	0.000415588	0.00265834	100524201	ENSSSCG00000040556
CvsSt	ENSSSCG00000040569	10.6552	4.23113	1.65425	2.55774	0.0105355	0.0337124	110259864	PLA2G10	phospholipase A2 group X [Source:HGNC Symbol;Acc:HGNC:9029]
CvsSt	ENSSSCG00000040607	641.634	2.33401	0.686786	3.39845	0.000677699	0.00394787	106510466	MAF	MAF bZIP transcription factor [Source:VGNC Symbol;Acc:VGNC:89945]
CvsSt	ENSSSCG00000040660	20.9447	2.30639	0.676958	3.407	0.00065682	0.00384987	106508932	TRAPPC3L	trafficking protein particle complex 3 like [Source:VGNC Symbol;Acc:VGNC:94375]
CvsSt	ENSSSCG00000040681	10462.8	11.0525	1.0247	10.786	4.00656e-27	1.55234e-24	399533	FABP4	fatty acid binding protein 4, adipocyte [Source:NCBI gene (formerly Entrezgene);Acc:399533]
CvsSt	ENSSSCG00000040689	123.94	10.0247	1.77934	5.63392	1.76164e-08	5.72682e-07	397681	APOA4	apolipoprotein A4 [Source:NCBI gene (formerly Entrezgene);Acc:397681]
CvsSt	ENSSSCG00000040815	14061.6	4.91256	0.675873	7.26847	3.63585e-13	3.57651e-11	100157144	DUSP5	dual specificity phosphatase 5 [Source:VGNC Symbol;Acc:VGNC:87487]
CvsSt	ENSSSCG00000040845	2155.4	2.95825	0.773086	3.82655	0.000129954	0.001041	100170768	AGPAT2	1-acylglycerol-3-phosphate O-acyltransferase 2 [Source:VGNC Symbol;Acc:VGNC:85184]
CvsSt	ENSSSCG00000040875	4.35302	5.31057	1.64182	3.23455	0.00121834	0.00626663	110260886	ZFPM1	zinc finger protein, FOG family member 1 [Source:VGNC Symbol;Acc:VGNC:95152]
CvsSt	ENSSSCG00000041013	31.1073	4.64042	0.944712	4.912	9.01524e-07	1.70134e-05
CvsSt	ENSSSCG00000041014	17.8595	6.48639	1.71641	3.77905	0.000157426	0.00121444
CvsSt	ENSSSCG00000041043	11.1138	4.98925	1.94204	2.56907	0.010197	0.0329082
CvsSt	ENSSSCG00000041050	373867	5.88215	0.839984	7.00269	2.51097e-12	2.20698e-10
CvsSt	ENSSSCG00000041051	7.80174	2.46027	1.01637	2.42066	0.0154925	0.0454577
CvsSt	ENSSSCG00000041076	22.1393	5.50047	1.60968	3.41711	0.00063289	0.00374429
CvsSt	ENSSSCG00000041118	6.29189	5.1357	1.74879	2.93672	0.00331702	0.0137738
CvsSt	ENSSSCG00000041130	4.93777	4.89651	1.75166	2.79536	0.00518423	0.0193707
CvsSt	ENSSSCG00000041169	31.1179	2.87015	0.632734	4.5361	5.73034e-06	7.91203e-05
CvsSt	ENSSSCG00000041171	51.6029	3.20771	0.892101	3.59568	0.00032354	0.0021797
CvsSt	ENSSSCG00000041179	173.057	10.4124	1.74196	5.97738	2.2676e-09	9.37918e-08
CvsSt	ENSSSCG00000041192	3.87141	4.78666	1.62783	2.94052	0.00327661	0.0136679
CvsSt	ENSSSCG00000041219	3.66686	4.93204	1.61906	3.04625	0.00231719	0.010373
CvsSt	ENSSSCG00000041237	74.3785	7.75984	1.6797	4.61978	3.84149e-06	5.67553e-05
CvsSt	ENSSSCG00000041266	33.7429	2.69383	0.831548	3.23953	0.00119725	0.00618499
CvsSt	ENSSSCG00000041274	51.4984	2.558	0.629022	4.06663	4.76983e-05	0.000460607
CvsSt	ENSSSCG00000041310	17.2458	2.00758	0.578017	3.47322	0.000514252	0.00316059
CvsSt	ENSSSCG00000041379	13.1152	2.53552	0.875937	2.89464	0.00379591	0.0153037
CvsSt	ENSSSCG00000041437	4.45163	4.52846	1.80328	2.51123	0.0120311	0.0374259
CvsSt	ENSSSCG00000041442	9.54157	4.33948	1.54176	2.81463	0.0048833	0.0185345
CvsSt	ENSSSCG00000041459	11.3895	6.41781	1.91618	3.34928	0.000810215	0.00451083
CvsSt	ENSSSCG00000041466	9.44491	3.33912	1.15406	2.89337	0.00381129	0.0153462
CvsSt	ENSSSCG00000041478	47.2243	8.51016	1.73775	4.89722	9.72029e-07	1.82351e-05
CvsSt	ENSSSCG00000041487	549.054	3.10076	0.558439	5.55255	2.8154e-08	8.71947e-07
CvsSt	ENSSSCG00000041499	11.8206	2.29461	0.928004	2.47263	0.0134124	0.0406246
CvsSt	ENSSSCG00000041504	169.81	3.40211	1.00679	3.37916	0.000727084	0.00417408
CvsSt	ENSSSCG00000041508	859.179	9.04765	0.84787	10.671	1.39083e-26	5.28099e-24
CvsSt	ENSSSCG00000041523	4.30054	5.35794	1.86899	2.86676	0.00414703	0.0163309
CvsSt	ENSSSCG00000041577	98.912	9.60911	1.67213	5.74663	9.1039e-09	3.24883e-07
CvsSt	ENSSSCG00000041611	6.62892	4.14025	1.67077	2.47804	0.0132106	0.0401351
CvsSt	ENSSSCG00000041622	3.62643	4.84573	1.57826	3.07029	0.00213848	0.0097592
CvsSt	ENSSSCG00000041624	3.93764	4.70253	1.63585	2.87466	0.0040446	0.016024
CvsSt	ENSSSCG00000041669	25.9988	2.44549	0.637963	3.83328	0.000126445	0.00101848
CvsSt	ENSSSCG00000041708	6.97086	4.14581	1.68559	2.45956	0.0139108	0.0417675
CvsSt	ENSSSCG00000041747	134.599	5.97455	1.05587	5.65842	1.52777e-08	5.05309e-07
CvsSt	ENSSSCG00000041751	71.7046	2.96769	0.765966	3.87443	0.000106873	0.000891863
CvsSt	ENSSSCG00000041764	14.1942	6.75475	1.54172	4.38132	1.17965e-05	0.000143148
CvsSt	ENSSSCG00000041778	5.68955	4.79704	1.7709	2.70881	0.00675245	0.0238212
CvsSt	ENSSSCG00000041810	142.966	6.07098	0.997338	6.08718	1.14914e-09	5.15754e-08
CvsSt	ENSSSCG00000041845	15.7006	6.89791	1.67548	4.11697	3.83881e-05	0.000384387
CvsSt	ENSSSCG00000041850	10.7277	6.60701	1.75732	3.7597	0.000170117	0.00129602
CvsSt	ENSSSCG00000041881	2.04783	4.0951	1.63046	2.51162	0.0120177	0.0374029
CvsSt	ENSSSCG00000041901	34.9977	5.45814	1.37785	3.96133	7.45323e-05	0.000660287
CvsSt	ENSSSCG00000041910	2.66289	4.2525	1.6597	2.56222	0.0104007	0.0333515
CvsSt	ENSSSCG00000041917	63.6218	2.43051	0.63508	3.82709	0.000129668	0.00103915	102165115	ENSSSCG00000041917
CvsSt	ENSSSCG00000041928	273.548	9.71707	1.52832	6.35802	2.04373e-10	1.09916e-08	100514981	KRTAP17-1	keratin associated protein 17-1 [Source:HGNC Symbol;Acc:HGNC:18917]
CvsSt	ENSSSCG00000041951	169.826	2.50998	0.374127	6.7089	1.961e-11	1.41854e-09
CvsSt	ENSSSCG00000041952	11.2123	6.01332	1.79967	3.34135	0.000833727	0.00462145
CvsSt	ENSSSCG00000041979	10.2913	3.01505	0.97859	3.08102	0.00206296	0.00949
CvsSt	ENSSSCG00000042001	3.03785	4.45781	1.65609	2.69178	0.00710727	0.0248447
CvsSt	ENSSSCG00000042039	46.257	7.09561	1.79861	3.94505	7.97825e-05	0.000699118
CvsSt	ENSSSCG00000042076	28.4781	7.59377	1.62529	4.67226	2.97904e-06	4.58324e-05
CvsSt	ENSSSCG00000042082	5.62771	3.12937	1.2626	2.47851	0.0131933	0.0401117
CvsSt	ENSSSCG00000042089	398.296	3.15755	0.49178	6.42065	1.35691e-10	7.83008e-09	100622059	KCTD11	potassium channel tetramerization domain containing 11 [Source:HGNC Symbol;Acc:HGNC:21302]
CvsSt	ENSSSCG00000042107	254.493	7.24156	1.06998	6.76796	1.30609e-11	9.72397e-10
CvsSt	ENSSSCG00000042108	7.91677	3.17945	1.21943	2.60732	0.00912536	0.0301768
CvsSt	ENSSSCG00000042110	8.49943	5.83913	1.78882	3.26423	0.00109761	0.00576595
CvsSt	ENSSSCG00000042146	92.8001	3.8704	0.808618	4.78643	1.69773e-06	2.88295e-05
CvsSt	ENSSSCG00000042160	12.5203	3.41319	1.01429	3.36509	0.000765179	0.00432993
CvsSt	ENSSSCG00000042162	5.97075	5.04823	1.56637	3.22289	0.00126905	0.00647137	100158240	KCNJ11	potassium inwardly rectifying channel subfamily J member 11 [Source:HGNC Symbol;Acc:HGNC:6257]
CvsSt	ENSSSCG00000042166	5.87762	5.06089	1.73214	2.92175	0.00348071	0.0142869
CvsSt	ENSSSCG00000042196	6.17684	5.29075	1.7012	3.11001	0.00187079	0.0088036
CvsSt	ENSSSCG00000042201	2.46809	4.19625	1.62986	2.57461	0.0100354	0.0324845
CvsSt	ENSSSCG00000042247	5.37188	5.1329	1.54437	3.32363	0.000888539	0.00486632
CvsSt	ENSSSCG00000042264	30.8713	7.84712	1.56613	5.01052	5.42844e-07	1.10816e-05
CvsSt	ENSSSCG00000042265	8.62546	6.04036	1.56011	3.87176	0.000108054	0.000899743
CvsSt	ENSSSCG00000042268	31.7784	2.17616	0.494209	4.40332	1.06607e-05	0.00013152
CvsSt	ENSSSCG00000042281	143.543	2.68529	0.692925	3.8753	0.000106492	0.000889463
CvsSt	ENSSSCG00000042283	29.8959	3.80865	0.792701	4.80466	1.55018e-06	2.66578e-05
CvsSt	ENSSSCG00000042312	53.2846	5.37246	1.10764	4.85035	1.23245e-06	2.21573e-05
CvsSt	ENSSSCG00000042315	51.4371	4.13896	0.792898	5.22004	1.78884e-07	4.29887e-06
CvsSt	ENSSSCG00000042321	79.9366	2.03468	0.451555	4.50594	6.60794e-06	8.86584e-05
CvsSt	ENSSSCG00000042364	3.83074	5.20604	1.79398	2.90194	0.00370854	0.0150377
CvsSt	ENSSSCG00000042386	331.952	2.99263	0.53938	5.54828	2.88496e-08	8.92036e-07
CvsSt	ENSSSCG00000042417	10.75	3.02102	1.04955	2.87839	0.00399717	0.0158824
CvsSt	ENSSSCG00000042427	6.47571	5.76704	1.63333	3.53084	0.000414239	0.00265386
CvsSt	ENSSSCG00000042434	61.2673	8.69452	1.58999	5.46829	4.54392e-08	1.29848e-06
CvsSt	ENSSSCG00000042485	6.48809	4.42166	1.61943	2.73038	0.00632612	0.0226186
CvsSt	ENSSSCG00000042487	99.5095	2.87432	0.546508	5.25942	1.44508e-07	3.57166e-06
CvsSt	ENSSSCG00000042493	7.54621	2.34782	0.89694	2.61759	0.00885519	0.0294925
CvsSt	ENSSSCG00000042498	26.1066	2.9484	0.756544	3.89719	9.73152e-05	0.000825158
CvsSt	ENSSSCG00000042526	73.3239	2.99873	1.05581	2.84021	0.00450838	0.0174356
CvsSt	ENSSSCG00000042528	14.7632	6.62527	1.72718	3.8359	0.000125106	0.00100855
CvsSt	ENSSSCG00000042551	17.8017	2.50842	0.909633	2.75761	0.00582252	0.021217
CvsSt	ENSSSCG00000042552	65.9059	8.73113	1.68041	5.19584	2.03803e-07	4.83649e-06
CvsSt	ENSSSCG00000042625	13.7982	2.49052	0.872425	2.85471	0.00430766	0.0168273
CvsSt	ENSSSCG00000042666	22.4452	6.57388	1.72555	3.80972	0.000139122	0.00110051
CvsSt	ENSSSCG00000042689	44.6567	2.84513	0.752001	3.78341	0.000154692	0.00119822
CvsSt	ENSSSCG00000042711	42.0851	2.62767	0.674769	3.89418	9.85295e-05	0.000834709
CvsSt	ENSSSCG00000042718	1367.01	6.11414	0.735145	8.31692	9.02803e-17	1.51679e-14	100157237	GNAT1	G protein subunit alpha transducin 1 [Source:HGNC Symbol;Acc:HGNC:4393]
CvsSt	ENSSSCG00000042763	10.5912	4.5556	1.52404	2.98916	0.00279743	0.0120484
CvsSt	ENSSSCG00000042772	9.39682	5.83904	1.72507	3.38482	0.000712238	0.00411123
CvsSt	ENSSSCG00000042775	2.5229	4.08376	1.66209	2.457	0.0140101	0.0420026
CvsSt	ENSSSCG00000042790	52.9396	3.00222	0.819607	3.663	0.000249277	0.0017637
CvsSt	ENSSSCG00000042811	24.6944	2.57133	0.662266	3.88262	0.000103336	0.000866914
CvsSt	ENSSSCG00000042815	26.728	2.73106	0.680709	4.01208	6.01858e-05	0.000553063	110259893	ENSSSCG00000042815
CvsSt	ENSSSCG00000042920	4.64713	4.5606	1.91565	2.3807	0.0172797	0.0491094
CvsSt	ENSSSCG00000042921	115.323	2.83677	0.459553	6.17288	6.70553e-10	3.17468e-08
CvsSt	ENSSSCG00000042926	17.1335	6.81496	1.85672	3.67043	0.000242145	0.00171919
CvsSt	ENSSSCG00000042929	7.09678	4.14763	1.54888	2.67782	0.00741025	0.0256488
CvsSt	ENSSSCG00000042949	5.73166	5.36663	1.58892	3.37753	0.000731411	0.00419132
CvsSt	ENSSSCG00000042960	11.4436	2.67783	0.894244	2.99452	0.00274874	0.0118875
CvsSt	ENSSSCG00000042962	11.4528	2.29898	0.695253	3.30668	0.000944096	0.00513278
CvsSt	ENSSSCG00000043012	117.799	8.63931	1.63845	5.27285	1.34323e-07	3.35101e-06
CvsSt	ENSSSCG00000043029	12.5136	3.68797	1.07558	3.42883	0.000606183	0.00361217
CvsSt	ENSSSCG00000043103	2.27195	4.27043	1.63477	2.61225	0.00899479	0.0298021
CvsSt	ENSSSCG00000043120	3.21815	4.01378	1.61673	2.48265	0.013041	0.0397661
CvsSt	ENSSSCG00000043121	7.42449	5.86571	1.64138	3.57364	0.00035205	0.00232881
CvsSt	ENSSSCG00000043186	2.3639	4.04803	1.67942	2.41038	0.0159361	0.0464385
CvsSt	ENSSSCG00000043196	237.448	10.3148	1.76738	5.83621	5.34023e-09	2.01961e-07
CvsSt	ENSSSCG00000043284	145.219	2.28412	0.566274	4.03359	5.49317e-05	0.00051348
CvsSt	ENSSSCG00000043296	4.85419	4.81933	1.78586	2.6986	0.00696313	0.0244037
CvsSt	ENSSSCG00000043343	11.7194	5.85737	1.74116	3.36406	0.00076805	0.00434229
CvsSt	ENSSSCG00000043378	23.9239	2.12846	0.679035	3.13454	0.00172124	0.00826865
CvsSt	ENSSSCG00000043383	5.15918	5.09796	1.97591	2.58005	0.00987855	0.0320534
CvsSt	ENSSSCG00000043395	26.3545	4.05087	1.1346	3.5703	0.000356573	0.00235544
CvsSt	ENSSSCG00000043418	10.7602	2.31999	0.776895	2.98623	0.00282439	0.0121452
CvsSt	ENSSSCG00000043447	5.68943	4.83348	1.65988	2.91194	0.00359188	0.0146303
CvsSt	ENSSSCG00000043467	60.1747	7.36346	1.59347	4.62103	3.81843e-06	5.64586e-05
CvsSt	ENSSSCG00000043485	8.25194	5.98495	1.80142	3.32235	0.000892623	0.0048823	100739663	ENSSSCG00000043485
CvsSt	ENSSSCG00000043496	10.3075	3.65447	1.32362	2.76097	0.00576308	0.0210651
CvsSt	ENSSSCG00000043587	237.692	5.81506	0.878924	6.61611	3.68768e-11	2.42251e-09
CvsSt	ENSSSCG00000043598	83.2865	4.80087	0.952922	5.03805	4.70296e-07	9.83324e-06
CvsSt	ENSSSCG00000043625	31.8835	2.65219	0.593135	4.47148	7.76798e-06	0.000100941
CvsSt	ENSSSCG00000043632	7.27377	5.67185	1.60787	3.52756	0.00041941	0.00267917
CvsSt	ENSSSCG00000043636	38.8656	7.72636	1.74997	4.41513	1.00952e-05	0.000126007
CvsSt	ENSSSCG00000043663	7.4086	5.8405	1.56905	3.72232	0.000197399	0.00145878
CvsSt	ENSSSCG00000043664	10.1323	5.54259	1.6163	3.42919	0.000605396	0.00360861
CvsSt	ENSSSCG00000043670	11.7395	3.27523	0.958618	3.41662	0.000634035	0.00374989
CvsSt	ENSSSCG00000043672	48.8246	4.56263	1.10293	4.13682	3.52156e-05	0.000357715
CvsSt	ENSSSCG00000043685	24.5351	2.28794	0.667838	3.42589	0.000612788	0.00364467
CvsSt	ENSSSCG00000043700	24.5808	2.77236	0.817644	3.39067	0.000697211	0.0040417
CvsSt	ENSSSCG00000043724	8.49798	2.90708	0.938086	3.09895	0.00194211	0.00905698
CvsSt	ENSSSCG00000043726	16.6122	3.29659	1.12392	2.93311	0.00335588	0.0139108
CvsSt	ENSSSCG00000043747	99.0217	3.85692	0.631596	6.10663	1.01756e-09	4.65503e-08
CvsSt	ENSSSCG00000043749	47.7923	2.48802	0.710814	3.50024	0.000464834	0.00291538
CvsSt	ENSSSCG00000043756	161.745	4.38678	0.874576	5.01589	5.27885e-07	1.07994e-05
CvsSt	ENSSSCG00000043761	189.849	3.16012	0.965663	3.27249	0.00106604	0.00563787
CvsSt	ENSSSCG00000043795	7.09047	5.29816	1.73666	3.05077	0.00228252	0.0102483
CvsSt	ENSSSCG00000043802	78.9688	4.50278	0.901555	4.99445	5.90026e-07	1.19548e-05
CvsSt	ENSSSCG00000043818	2.69979	4.23304	1.65121	2.5636	0.0103592	0.0332436
CvsSt	ENSSSCG00000043854	3.60146	4.87616	1.73859	2.80467	0.00503688	0.0189657
CvsSt	ENSSSCG00000043864	98.4232	9.2186	1.64106	5.61747	1.93777e-08	6.24594e-07
CvsSt	ENSSSCG00000043887	3.15203	4.30719	1.61664	2.66429	0.00771505	0.0265393
CvsSt	ENSSSCG00000043903	125.764	5.26683	0.920344	5.72267	1.04863e-08	3.64111e-07
CvsSt	ENSSSCG00000043918	3.04541	4.161	1.73756	2.39474	0.0166322	0.0478137
CvsSt	ENSSSCG00000043928	93.5562	4.38405	0.964206	4.5468	5.44677e-06	7.5756e-05
CvsSt	ENSSSCG00000043961	15.4133	2.82215	0.92464	3.05216	0.00227202	0.0102141
CvsSt	ENSSSCG00000043969	811.051	6.07781	0.670214	9.06845	1.20719e-19	2.5751e-17
CvsSt	ENSSSCG00000043997	702.505	4.34591	0.761005	5.71075	1.12476e-08	3.86845e-07
CvsSt	ENSSSCG00000044035	28.1283	2.19536	0.616258	3.56241	0.000367465	0.00241191
CvsSt	ENSSSCG00000044096	4988.67	11.2823	1.18231	9.54259	1.39306e-21	3.77819e-19
CvsSt	ENSSSCG00000044113	29.8861	2.77647	0.592375	4.68701	2.7723e-06	4.33543e-05
CvsSt	ENSSSCG00000044134	18.469	4.11481	1.35923	3.0273	0.00246751	0.0109504
CvsSt	ENSSSCG00000044136	4.73098	5.32002	1.7316	3.07231	0.00212408	0.00970768
CvsSt	ENSSSCG00000044141	89.9537	2.79074	0.500754	5.57308	2.50278e-08	7.82787e-07
CvsSt	ENSSSCG00000044182	8.3226	2.60695	1.00344	2.598	0.00937683	0.0307885
CvsSt	ENSSSCG00000044191	8.07872	4.58016	1.51363	3.02594	0.0024786	0.0109765
CvsSt	ENSSSCG00000044208	15.0739	2.52817	0.80933	3.12378	0.00178545	0.00847206
CvsSt	ENSSSCG00000044215	38.7085	7.61244	1.75663	4.33354	1.46727e-05	0.000172377
CvsSt	ENSSSCG00000044226	33.3806	3.5037	0.765801	4.57521	4.75748e-06	6.75043e-05
CvsSt	ENSSSCG00000044228	14.9711	6.2273	1.64873	3.77703	0.000158712	0.00122287
CvsSt	ENSSSCG00000044280	73.8717	8.2385	1.74443	4.72275	2.32676e-06	3.76586e-05
CvsSt	ENSSSCG00000044281	1202.01	8.27391	0.801117	10.328	5.26642e-25	1.88647e-22
CvsSt	ENSSSCG00000044295	58.7354	2.79047	0.963596	2.89589	0.0037809	0.0152562
CvsSt	ENSSSCG00000044300	24.8998	3.11987	0.792507	3.9367	8.26082e-05	0.000718482
CvsSt	ENSSSCG00000044308	5.13418	5.26036	1.85537	2.8352	0.00457963	0.0176465
CvsSt	ENSSSCG00000044322	6.03046	3.02734	1.16809	2.59171	0.00955009	0.0312224
CvsSt	ENSSSCG00000044358	18.7581	3.8671	1.47326	2.62486	0.0086684	0.0290384
CvsSt	ENSSSCG00000044360	6.09547	3.16102	1.2212	2.58845	0.00964076	0.0314592
CvsSt	ENSSSCG00000044363	29.3353	3.69538	0.796677	4.63849	3.50956e-06	5.24881e-05
CvsSt	ENSSSCG00000044366	2.09994	4.04283	1.59035	2.5421	0.0110187	0.034935
CvsSt	ENSSSCG00000044381	22.3247	4.03556	1.1323	3.56404	0.000365185	0.00240313
CvsSt	ENSSSCG00000044396	139.727	3.01494	0.557299	5.40991	6.30563e-08	1.71754e-06
CvsSt	ENSSSCG00000044407	2.32538	4.36175	1.75213	2.48939	0.0127961	0.0391767
CvsSt	ENSSSCG00000044435	23.9314	2.06153	0.703065	2.93221	0.00336559	0.0139267
CvsSt	ENSSSCG00000044472	68.1267	5.26351	1.62216	3.24475	0.00117554	0.00609939	100512751	COL19A1	collagen type XIX alpha 1 chain [Source:HGNC Symbol;Acc:HGNC:2196]
CvsSt	ENSSSCG00000044483	116.422	3.43661	0.51346	6.69303	2.18594e-11	1.56604e-09
CvsSt	ENSSSCG00000044603	4.50318	3.75236	1.5343	2.44565	0.0144592	0.0430476
CvsSt	ENSSSCG00000044633	4.62107	5.35379	1.71208	3.12706	0.00176561	0.00841003
CvsSt	ENSSSCG00000044662	6.95698	4.21087	1.54337	2.72836	0.00636505	0.0227229
CvsSt	ENSSSCG00000044672	11.8886	5.17676	1.72437	3.00211	0.00268114	0.0116666
CvsSt	ENSSSCG00000044680	13.252	4.19075	1.13497	3.69238	0.000222164	0.0016123
CvsSt	ENSSSCG00000044690	2510.57	3.34201	0.516454	6.47106	9.7319e-11	5.79185e-09	102159471	FMN1	formin 1 [Source:HGNC Symbol;Acc:HGNC:3768]
CvsSt	ENSSSCG00000044738	74.5518	5.24366	1.10798	4.73264	2.21616e-06	3.61458e-05
CvsSt	ENSSSCG00000044762	8.91089	4.27199	1.68626	2.5334	0.0112961	0.0356298	100038010	CCL11	chemokine (C-C motif) ligand 11 [Source:NCBI gene (formerly Entrezgene);Acc:100038010]
CvsSt	ENSSSCG00000044784	24.4254	4.78308	1.06026	4.51125	6.4447e-06	8.70837e-05	110260191	ENSSSCG00000044784
CvsSt	ENSSSCG00000044805	47.828	2.02323	0.582813	3.47149	0.000517578	0.00317589
CvsSt	ENSSSCG00000044890	196.957	10.5542	1.55766	6.77564	1.23858e-11	9.33114e-10
CvsSt	ENSSSCG00000044895	64.9027	5.82522	1.26726	4.59672	4.29198e-06	6.22009e-05
CvsSt	ENSSSCG00000044908	26.1	2.66204	0.722784	3.68304	0.000230473	0.00166119
CvsSt	ENSSSCG00000044919	48.9498	4.83759	0.953507	5.07347	3.90627e-07	8.38919e-06
CvsSt	ENSSSCG00000044927	10.4178	6.08341	1.56822	3.87918	0.000104808	0.000876945
CvsSt	ENSSSCG00000044938	11.6469	3.68349	1.18699	3.10321	0.00191434	0.00896493
CvsSt	ENSSSCG00000044986	8.01061	2.97647	1.11886	2.66027	0.00780791	0.0267521
CvsSt	ENSSSCG00000044997	3.15657	4.12445	1.67994	2.45512	0.0140837	0.0421801
CvsSt	ENSSSCG00000045063	43.6386	4.39567	0.946196	4.64562	3.39056e-06	5.11277e-05
CvsSt	ENSSSCG00000045084	32.2533	2.51358	0.866528	2.90074	0.00372278	0.0150729
CvsSt	ENSSSCG00000045092	56.2202	5.04269	1.0742	4.69434	2.67463e-06	4.20694e-05
CvsSt	ENSSSCG00000045094	11.1495	4.78944	1.59727	2.99852	0.00271294	0.0117808
CvsSt	ENSSSCG00000045108	31.5842	7.48	1.62825	4.59388	4.3508e-06	6.28286e-05
CvsSt	ENSSSCG00000045132	6.3054	4.3968	1.63307	2.69235	0.00709514	0.0248068
CvsSt	ENSSSCG00000045139	73.1747	9.26789	1.6799	5.51693	3.44983e-08	1.02818e-06
CvsSt	ENSSSCG00000045193	2.54617	4.22608	1.67085	2.52931	0.0114289	0.0359233
CvsSt	ENSSSCG00000045223	18.1029	3.29535	1.12156	2.93819	0.00330133	0.0137417
CvsSt	ENSSSCG00000045232	4.69953	5.28775	1.82495	2.89747	0.00376185	0.0152052
CvsSt	ENSSSCG00000045251	4.45194	5.09034	1.81353	2.80686	0.00500266	0.0188801
CvsSt	ENSSSCG00000045261	14.3234	6.77561	1.63839	4.13554	3.5412e-05	0.000358749
CvsSt	ENSSSCG00000045264	26.4436	3.13036	0.795506	3.93506	8.31771e-05	0.000721387
CvsSt	ENSSSCG00000045281	6.38586	2.95681	1.17631	2.51363	0.0119495	0.0372453
CvsSt	ENSSSCG00000045283	316.355	4.10692	0.748534	5.48661	4.09714e-08	1.18944e-06	102160712	ENSSSCG00000045283
CvsSt	ENSSSCG00000045290	112.861	2.99118	0.552868	5.41029	6.2924e-08	1.7164e-06
CvsSt	ENSSSCG00000045296	2.78781	4.44155	1.57053	2.82805	0.00468325	0.017951
CvsSt	ENSSSCG00000045298	30.3086	2.17522	0.595753	3.65122	0.000260999	0.00183317
CvsSt	ENSSSCG00000045362	44.5214	3.89005	0.624809	6.22598	4.78559e-10	2.35273e-08
CvsSt	ENSSSCG00000045381	9.36617	2.26233	0.925833	2.44356	0.014543	0.0432282
CvsSt	ENSSSCG00000045388	19.4549	3.81653	0.982564	3.88426	0.000102642	0.000862587
CvsSt	ENSSSCG00000045402	151.285	3.36391	0.529846	6.34884	2.16947e-10	1.15695e-08
CvsSt	ENSSSCG00000045418	38.0361	7.93516	1.67227	4.74514	2.08362e-06	3.41602e-05
CvsSt	ENSSSCG00000045443	13.4715	6.68961	1.78108	3.75592	0.000172705	0.00131048
CvsSt	ENSSSCG00000045545	45.7408	4.99132	1.04399	4.78102	1.7441e-06	2.94706e-05
CvsSt	ENSSSCG00000045560	30.3586	3.24154	0.63201	5.12895	2.91369e-07	6.51572e-06
CvsSt	ENSSSCG00000045586	3.07909	4.56031	1.83456	2.48579	0.0129265	0.0394995
CvsSt	ENSSSCG00000045601	3.24587	4.57589	1.71945	2.66124	0.00778527	0.0266938
CvsSt	ENSSSCG00000045629	7.78719	5.87238	1.56769	3.74587	0.000179767	0.00135003
CvsSt	ENSSSCG00000045659	13.9297	6.42931	1.7452	3.684	0.000229604	0.00165696
CvsSt	ENSSSCG00000045670	77.6964	3.10219	0.9453	3.2817	0.00103184	0.00550039
CvsSt	ENSSSCG00000045673	13.9554	2.75588	0.974315	2.82853	0.00467622	0.0179313	100622765	ENSSSCG00000045673
CvsSt	ENSSSCG00000045679	17.6699	2.79569	0.82189	3.40154	0.000670068	0.00391182
CvsSt	ENSSSCG00000045702	193.274	2.02615	0.355047	5.7067	1.15187e-08	3.94023e-07
CvsSt	ENSSSCG00000045705	3.5219	4.79704	1.74383	2.75086	0.00594394	0.0215519
CvsSt	ENSSSCG00000045743	3.8597	4.69337	1.65567	2.83473	0.00458643	0.0176691
CvsSt	ENSSSCG00000045769	434.002	5.14062	0.737306	6.97217	3.12086e-12	2.63331e-10
CvsSt	ENSSSCG00000045784	12.6784	2.61313	0.751315	3.47807	0.00050503	0.00311501
CvsSt	ENSSSCG00000045903	11.1842	2.214	0.817353	2.70875	0.0067538	0.0238212
CvsSt	ENSSSCG00000045905	523.081	2.50785	0.665319	3.7694	0.00016364	0.00125473
CvsSt	ENSSSCG00000045906	233.113	2.70768	0.570935	4.74253	2.11066e-06	3.45736e-05
CvsSt	ENSSSCG00000045922	13.2524	4.77724	1.84988	2.58246	0.00980981	0.0319012
CvsSt	ENSSSCG00000045935	11.1314	3.96839	1.18309	3.35425	0.00079579	0.00445666
CvsSt	ENSSSCG00000045991	3.00437	4.66334	1.78437	2.61344	0.00896363	0.02973
CvsSt	ENSSSCG00000046022	10.3115	5.93306	1.60828	3.68907	0.00022508	0.00162972
CvsSt	ENSSSCG00000046044	36.1852	2.77473	0.700162	3.96299	7.40183e-05	0.000656653
CvsSt	ENSSSCG00000046070	9.18885	2.46083	0.837129	2.93961	0.00328626	0.0136999
CvsSt	ENSSSCG00000046097	441.518	3.41292	0.459688	7.42443	1.13264e-13	1.24296e-11
CvsSt	ENSSSCG00000046102	11.6057	2.543	0.971811	2.61676	0.00887683	0.0295453	100524113	ENSSSCG00000046102
CvsSt	ENSSSCG00000046133	13.0934	6.01956	1.84263	3.26683	0.00108761	0.00572926
CvsSt	ENSSSCG00000046147	5.64385	4.52884	1.77372	2.5533	0.0106707	0.0340591
CvsSt	ENSSSCG00000046180	2.80581	3.9222	1.61947	2.4219	0.0154398	0.0453332
CvsSt	ENSSSCG00000046202	15.0519	2.32106	0.967522	2.39897	0.0164411	0.0474588
CvsSt	ENSSSCG00000046207	16675.9	12.1208	0.92321	13.129	2.24716e-39	2.03154e-36
CvsSt	ENSSSCG00000046258	9.83914	2.57454	0.878002	2.93227	0.00336496	0.0139267
CvsSt	ENSSSCG00000046280	10.8047	4.14924	1.34709	3.08015	0.00206894	0.00950831
CvsSt	ENSSSCG00000046312	374.721	6.78326	0.889612	7.62497	2.44097e-14	3.0488e-12
CvsSt	ENSSSCG00000046318	20.5178	4.44082	1.31882	3.36726	0.000759199	0.00430508
CvsSt	ENSSSCG00000046341	14.5887	5.45755	1.60212	3.40646	0.000658109	0.00385504
CvsSt	ENSSSCG00000046384	6.47178	2.43208	1.01289	2.40114	0.0163442	0.0472507
CvsSt	ENSSSCG00000046443	2357.27	5.22972	0.708289	7.3836	1.54066e-13	1.62497e-11
CvsSt	ENSSSCG00000046452	471.686	4.9167	0.864724	5.68586	1.30157e-08	4.4047e-07	110255302	ENSSSCG00000046452
CvsSt	ENSSSCG00000046472	28.5199	5.21215	1.23951	4.20503	2.61052e-05	0.000279058
CvsSt	ENSSSCG00000046475	4.90512	5.43572	1.78322	3.04826	0.00230174	0.010316	100622492	ENSSSCG00000046475
CvsSt	ENSSSCG00000046481	5.26722	5.12457	1.56148	3.28186	0.00103124	0.00549945
CvsSt	ENSSSCG00000046488	8.55121	3.75535	1.17447	3.19747	0.00138637	0.006941
CvsSt	ENSSSCG00000046503	1.93098	4.1343	1.60949	2.5687	0.0102082	0.0329327
CvsSt	ENSSSCG00000046524	72492.2	10.8494	0.509537	21.2927	1.32632e-100	2.51801e-96	100626502	PRR9	proline rich 9 [Source:HGNC Symbol;Acc:HGNC:32057]
CvsSt	ENSSSCG00000046528	3373.64	3.36168	0.519897	6.46606	1.00592e-10	5.93087e-09
CvsSt	ENSSSCG00000046563	11.7523	2.51613	1.01337	2.48293	0.0130306	0.0397535	114482223	ssc-mir-10388	ssc-mir-10388 [Source:miRBase;Acc:MI0033401]
CvsSt	ENSSSCG00000046567	428.835	8.8012	1.16852	7.53189	5.00099e-14	5.82477e-12
CvsSt	ENSSSCG00000046578	10.6574	2.51416	0.770766	3.2619	0.0011067	0.00580711
CvsSt	ENSSSCG00000046601	6.01198	4.11331	1.72532	2.38409	0.0171215	0.0488213
CvsSt	ENSSSCG00000046612	11.4064	2.02248	0.75304	2.68576	0.00723652	0.025176
CvsSt	ENSSSCG00000046642	33.5363	7.74497	1.76405	4.39045	1.13115e-05	0.000138244
CvsSt	ENSSSCG00000046670	7.11118	5.50239	1.71285	3.21241	0.00131624	0.00665837
CvsSt	ENSSSCG00000046678	3.31356	4.52394	1.55391	2.91133	0.00359899	0.0146561
CvsSt	ENSSSCG00000046681	140.044	8.90778	1.78693	4.98495	6.19764e-07	1.2451e-05	100623393	ENSSSCG00000046681
CvsSt	ENSSSCG00000046693	2.15412	4.08074	1.65337	2.46814	0.0135817	0.0409999
CvsSt	ENSSSCG00000046694	6.57765	5.33935	1.84882	2.88798	0.0038772	0.0155227
CvsSt	ENSSSCG00000046706	5.40102	3.94634	1.54619	2.5523	0.0107014	0.0341283
CvsSt	ENSSSCG00000046709	6.04915	5.43827	1.60281	3.39296	0.000691421	0.00401426
CvsSt	ENSSSCG00000046722	11.2486	3.97335	1.15443	3.44183	0.000577784	0.00347567
CvsSt	ENSSSCG00000046736	16.6487	6.63893	1.82176	3.64424	0.000268179	0.00187459
CvsSt	ENSSSCG00000046754	7.99297	3.27776	1.22335	2.67932	0.00737709	0.0255573
CvsSt	ENSSSCG00000046769	5.70033	5.51857	1.63777	3.36956	0.000752887	0.00427695
CvsSt	ENSSSCG00000046775	25.3551	7.64559	1.78002	4.29522	1.74519e-05	0.000200189
CvsSt	ENSSSCG00000046804	19674.2	10.9921	0.935352	11.7518	6.91071e-32	3.64444e-29
CvsSt	ENSSSCG00000046811	28.5104	2.55379	0.532354	4.79716	1.6093e-06	2.74754e-05
CvsSt	ENSSSCG00000046843	13.469	2.75361	0.841835	3.27096	0.00107184	0.00566033	110261410	ENSSSCG00000046843
CvsSt	ENSSSCG00000046883	63.727	9.00284	1.62842	5.52856	3.22865e-08	9.7634e-07
CvsSt	ENSSSCG00000046914	46.8766	3.80418	0.808228	4.70682	2.51614e-06	4.01138e-05
CvsSt	ENSSSCG00000046920	6.44966	5.59255	1.66839	3.35207	0.000802094	0.0044748
CvsSt	ENSSSCG00000046952	6.2522	2.94416	1.19284	2.46819	0.0135798	0.0409999
CvsSt	ENSSSCG00000046958	2.70084	4.10057	1.67054	2.45464	0.0141025	0.0422012
CvsSt	ENSSSCG00000046960	1.93934	3.98921	1.6735	2.38375	0.0171373	0.0488369
CvsSt	ENSSSCG00000046984	3390.46	4.19229	0.696908	6.01557	1.79259e-09	7.64088e-08
CvsSt	ENSSSCG00000047083	73.7203	2.49598	0.511046	4.88406	1.03924e-06	1.92299e-05	100738859	H2BC21	H2B clustered histone 21 [Source:HGNC Symbol;Acc:HGNC:4760]
CvsSt	ENSSSCG00000047086	14.0758	6.57563	1.58451	4.14993	3.32571e-05	0.00034166
CvsSt	ENSSSCG00000047090	23.8116	2.07065	0.558293	3.70889	0.000208172	0.00152769
CvsSt	ENSSSCG00000047131	3.59932	4.51391	1.59301	2.83358	0.00460301	0.0177222
CvsSt	ENSSSCG00000047144	76.3365	3.0297	0.547659	5.53208	3.16447e-08	9.62779e-07
CvsSt	ENSSSCG00000047214	7.7311	5.61335	1.56658	3.5832	0.000339412	0.00226096
CvsSt	ENSSSCG00000047217	7.57676	5.41758	1.89925	2.85248	0.00433801	0.016932
CvsSt	ENSSSCG00000047236	170.786	7.24078	1.01311	7.14707	8.86508e-13	8.41518e-11
CvsSt	ENSSSCG00000047264	47.494	2.06618	0.497935	4.1495	3.33196e-05	0.000342116
CvsSt	ENSSSCG00000047274	14.7483	2.08134	0.853586	2.43835	0.0147546	0.0437135
CvsSt	ENSSSCG00000047283	32.8836	4.18584	1.13581	3.68535	0.000228384	0.00164988
CvsSt	ENSSSCG00000047290	19.9445	2.53219	0.760648	3.32899	0.000871619	0.00478949
CvsSt	ENSSSCG00000047297	35.8114	5.63266	1.16301	4.84317	1.27783e-06	2.28003e-05
CvsSt	ENSSSCG00000047309	89.9989	9.71916	1.6834	5.77354	7.76252e-09	2.80708e-07
CvsSt	ENSSSCG00000047323	4.39882	4.56984	1.6815	2.71772	0.00657342	0.0233177
CvsSt	ENSSSCG00000047324	4665.38	2.77353	0.551318	5.03074	4.88599e-07	1.01378e-05
CvsSt	ENSSSCG00000047336	3.69753	4.66504	1.63559	2.8522	0.00434173	0.0169412
CvsSt	ENSSSCG00000047361	15.1442	2.39406	0.700124	3.41948	0.00062742	0.00371888
CvsSt	ENSSSCG00000047400	38.558	2.74302	0.701357	3.91102	9.19089e-05	0.000783868
CvsSt	ENSSSCG00000047429	10.2546	6.20016	1.65248	3.75204	0.000175404	0.0013246
CvsSt	ENSSSCG00000047432	3004.54	2.22562	0.79326	2.80566	0.00502132	0.0189259
CvsSt	ENSSSCG00000047438	18.1361	4.60847	1.22071	3.77523	0.000159863	0.00122924
CvsSt	ENSSSCG00000047441	12.994	2.55128	0.974389	2.61834	0.00883587	0.0294479
CvsSt	ENSSSCG00000047460	22.2312	2.59339	0.71265	3.63908	0.000273614	0.00190134
CvsSt	ENSSSCG00000047461	230.64	9.32909	1.65744	5.62862	1.81657e-08	5.88527e-07
CvsSt	ENSSSCG00000047465	11.0084	3.68453	1.35634	2.71652	0.00659728	0.0233805	106507011	SERTM2	serine rich and transmembrane domain containing 2 [Source:NCBI gene (formerly Entrezgene);Acc:106507011]
CvsSt	ENSSSCG00000047488	5.74274	5.36393	1.87586	2.85946	0.00424366	0.0166329
CvsSt	ENSSSCG00000047521	72.5167	2.47849	0.594265	4.17069	3.0368e-05	0.000316952
CvsSt	ENSSSCG00000047543	3.4482	4.65519	1.60012	2.90928	0.00362264	0.0147366
CvsSt	ENSSSCG00000047595	9.11855	3.63644	1.16075	3.13285	0.00173117	0.00831003
CvsSt	ENSSSCG00000047610	4.41908	5.2481	1.8531	2.83207	0.00462483	0.0177799
CvsSt	ENSSSCG00000047630	11.4343	5.47506	1.98665	2.75593	0.00585253	0.0212937
CvsSt	ENSSSCG00000047641	63.5846	3.07923	0.689016	4.46902	7.85781e-06	0.000101969
CvsSt	ENSSSCG00000047670	150.299	8.48951	1.69758	5.00094	5.70513e-07	1.15718e-05
CvsSt	ENSSSCG00000047677	148.247	2.18709	0.356694	6.13158	8.70115e-10	4.04881e-08
CvsSt	ENSSSCG00000047691	56.8862	4.24702	0.917981	4.62648	3.71924e-06	5.51894e-05
CvsSt	ENSSSCG00000047719	29.5248	2.94728	0.978907	3.01078	0.00260575	0.0114171
CvsSt	ENSSSCG00000047740	15.5453	7.10463	1.59021	4.46774	7.905e-06	0.000102441
CvsSt	ENSSSCG00000047770	6.24908	4.32612	1.73302	2.4963	0.0125498	0.0386218
CvsSt	ENSSSCG00000047772	12.4982	2.63885	0.958562	2.75293	0.00590653	0.0214462
CvsSt	ENSSSCG00000047818	14.8664	2.45988	0.706682	3.48088	0.000499762	0.00308753
CvsSt	ENSSSCG00000047840	2.79027	4.5638	1.76774	2.58171	0.00983122	0.0319544
CvsSt	ENSSSCG00000047876	123.211	10.1184	1.7159	5.89688	3.70447e-09	1.44118e-07	100623490	ENSSSCG00000047876
CvsSt	ENSSSCG00000047892	4287.05	9.54377	0.771711	12.367	3.94148e-35	2.4943e-32	110256006	KRTAP16-1	keratin associated protein 16-1 [Source:HGNC Symbol;Acc:HGNC:18916]
CvsSt	ENSSSCG00000047902	283.229	9.7513	1.72434	5.65508	1.55773e-08	5.14322e-07
CvsSt	ENSSSCG00000047934	19.4347	6.02544	1.67472	3.59787	0.000320829	0.00216759
CvsSt	ENSSSCG00000047938	9.28699	5.76485	1.67431	3.44312	0.000575042	0.00346247
CvsSt	ENSSSCG00000047939	374.985	10.0355	1.61654	6.20802	5.36558e-10	2.59861e-08	110255910	ENSSSCG00000047939
CvsSt	ENSSSCG00000047946	126.192	6.69843	1.22087	5.4866	4.09743e-08	1.18944e-06
CvsSt	ENSSSCG00000047982	37.9606	4.61319	1.26966	3.63341	0.000279703	0.00193448
CvsSt	ENSSSCG00000047989	3.7667	3.98874	1.59649	2.49844	0.0124742	0.038464
CvsSt	ENSSSCG00000048060	980.788	5.4537	0.767288	7.10776	1.17939e-12	1.11397e-10
CvsSt	ENSSSCG00000048066	11.8802	2.62792	0.756842	3.47222	0.000516173	0.00317036
CvsSt	ENSSSCG00000048083	311.928	7.76195	1.19284	6.50711	7.66111e-11	4.66174e-09
CvsSt	ENSSSCG00000048119	13.1592	2.9148	1.14876	2.53734	0.0111698	0.0352898
CvsSt	ENSSSCG00000048140	6.93874	5.60718	1.63598	3.42741	0.000609362	0.00362656
CvsSt	ENSSSCG00000048144	30.853	4.96814	1.42966	3.47505	0.000510763	0.00314424
CvsSt	ENSSSCG00000048172	13.3235	3.42025	1.11892	3.05674	0.00223762	0.010105
CvsSt	ENSSSCG00000048179	11.3188	2.72201	0.899694	3.02549	0.00248231	0.0109878
CvsSt	ENSSSCG00000048182	241.476	7.39813	1.19735	6.17877	6.46039e-10	3.06626e-08
CvsSt	ENSSSCG00000048192	544.323	3.50091	0.715637	4.89202	9.9805e-07	1.8604e-05
CvsSt	ENSSSCG00000048193	143.763	2.12823	0.372335	5.71592	1.09112e-08	3.7801e-07
CvsSt	ENSSSCG00000048198	4.86139	5.26973	1.63451	3.22404	0.00126395	0.00644884
CvsSt	ENSSSCG00000048217	503.818	9.66456	1.30441	7.40913	1.27126e-13	1.36355e-11
CvsSt	ENSSSCG00000048226	9.05253	2.03568	0.855114	2.3806	0.0172847	0.0491094
CvsSt	ENSSSCG00000048235	2.50964	4.086	1.61475	2.53043	0.0113924	0.0358484	100737419	ENSSSCG00000048235
CvsSt	ENSSSCG00000048240	331.567	4.72429	0.707968	6.67303	2.50575e-11	1.76191e-09	100522528	SAMD5	sterile alpha motif domain containing 5 [Source:HGNC Symbol;Acc:HGNC:21180]
CvsSt	ENSSSCG00000048244	24.0972	5.32094	1.26689	4.20001	2.66899e-05	0.000284029
CvsSt	ENSSSCG00000048285	14.9531	3.11023	1.23169	2.52518	0.0115638	0.0362574
CvsSt	ENSSSCG00000048379	3.50632	4.57957	1.84556	2.4814	0.0130868	0.0398737
CvsSt	ENSSSCG00000048418	6.03656	4.42374	1.68449	2.62615	0.00863564	0.0289762
CvsSt	ENSSSCG00000048424	27.4849	2.84321	0.645223	4.40656	1.05028e-05	0.000130126
CvsSt	ENSSSCG00000048441	2.43605	4.14909	1.68367	2.46431	0.0137278	0.0413424
CvsSt	ENSSSCG00000048442	56.5517	2.66083	0.610763	4.35657	1.32115e-05	0.000156959
CvsSt	ENSSSCG00000048449	182.222	10.7139	1.67033	6.41425	1.41514e-10	8.11676e-09
CvsSt	ENSSSCG00000048461	5.37975	5.16718	1.88888	2.73558	0.00622711	0.0223481
CvsSt	ENSSSCG00000048484	6.26715	5.63723	1.64682	3.42311	0.000619086	0.00367752	100620954	CDC20B	cell division cycle 20B [Source:HGNC Symbol;Acc:HGNC:24222]
CvsSt	ENSSSCG00000048500	7.45869	4.39656	1.56873	2.80263	0.00506882	0.019052
CvsSt	ENSSSCG00000048502	47.4764	3.42847	1.10925	3.09081	0.00199614	0.00926118
CvsSt	ENSSSCG00000048554	19.6634	2.8882	0.838332	3.44518	0.000570688	0.00344171
CvsSt	ENSSSCG00000048580	6.61992	5.66821	1.6717	3.39069	0.000697167	0.0040417
CvsSt	ENSSSCG00000048604	10.3786	4.72172	1.50976	3.12747	0.00176319	0.00840879
CvsSt	ENSSSCG00000048606	33.6744	2.74434	1.01422	2.70586	0.00681272	0.0239917
CvsSt	ENSSSCG00000048652	2.181	4.30254	1.73982	2.47298	0.0133991	0.040597
CvsSt	ENSSSCG00000048678	71.8606	2.98505	0.549134	5.43592	5.4514e-08	1.51087e-06
CvsSt	ENSSSCG00000048684	140.119	7.10118	1.0658	6.66278	2.68687e-11	1.86851e-09
CvsSt	ENSSSCG00000048693	7.07917	4.77892	1.64036	2.91334	0.00357587	0.0145915
CvsSt	ENSSSCG00000048721	9.30096	5.76317	1.87828	3.06832	0.00215267	0.00980528
CvsSt	ENSSSCG00000048742	14.1919	2.00073	0.596844	3.35218	0.000801772	0.00447432
CvsSt	ENSSSCG00000048802	3.18094	4.52517	1.86514	2.42618	0.0152588	0.0449409	100525054	ENSSSCG00000048802
CvsSt	ENSSSCG00000048809	7.86382	2.02204	0.850374	2.37782	0.0174152	0.0494161
CvsSt	ENSSSCG00000048831	117.897	5.85366	0.957426	6.11396	9.71889e-10	4.46763e-08
CvsSt	ENSSSCG00000048855	11.2806	2.97672	0.914556	3.25482	0.00113465	0.00591468
CvsSt	ENSSSCG00000048856	487075	5.70195	0.828891	6.87902	6.02678e-12	4.79649e-10
CvsSt	ENSSSCG00000048879	11.5314	6.14105	1.71257	3.58588	0.000335945	0.00224416
CvsSt	ENSSSCG00000048895	397.134	5.80441	0.790327	7.34432	2.06809e-13	2.1455e-11
CvsSt	ENSSSCG00000048917	8.73477	5.94008	1.76486	3.36576	0.000763334	0.0043212
CvsSt	ENSSSCG00000048938	12.5316	3.22364	0.782461	4.11988	3.79078e-05	0.000380783
CvsSt	ENSSSCG00000048975	3.20617	4.71518	1.78532	2.64109	0.00826403	0.0279766
CvsSt	ENSSSCG00000048976	105.684	4.87304	0.767827	6.34654	2.2021e-10	1.16454e-08
CvsSt	ENSSSCG00000048979	12.7833	2.10733	0.70313	2.99707	0.00272584	0.0118253
CvsSt	ENSSSCG00000049028	377.899	9.18096	1.29993	7.06267	1.63338e-12	1.50091e-10
CvsSt	ENSSSCG00000049035	26.9406	7.761	1.69212	4.58655	4.50627e-06	6.47627e-05
CvsSt	ENSSSCG00000049046	29.4264	2.48262	0.768429	3.23077	0.00123455	0.00633458
CvsSt	ENSSSCG00000049056	38.3418	8.3019	1.70284	4.87532	1.08634e-06	1.99437e-05
CvsSt	ENSSSCG00000049072	37285.1	11.1916	0.89605	12.4899	8.47509e-36	5.54826e-33	102164863	ENSSSCG00000049072
CvsSt	ENSSSCG00000049077	14.1556	5.57626	1.83428	3.04002	0.00236561	0.0105599
CvsSt	ENSSSCG00000049117	125.035	2.60588	0.429159	6.07205	1.26284e-09	5.54977e-08
CvsSt	ENSSSCG00000049127	4.93711	4.90159	1.58187	3.09861	0.00194433	0.00906511
CvsSt	ENSSSCG00000049152	46.4214	2.5597	0.957674	2.67283	0.00752138	0.0259672
CvsSt	ENSSSCG00000049153	3.16309	4.52136	1.5735	2.87344	0.00406029	0.0160794
CvsSt	ENSSSCG00000049158	14.6939	2.03239	0.69164	2.93851	0.00329792	0.0137354
CvsSt	ENSSSCG00000049166	9.04929	2.32244	0.962803	2.41216	0.0158581	0.046261
CvsSt	ENSSSCG00000049172	115.092	5.68588	1.04323	5.45029	5.02889e-08	1.40816e-06
CvsSt	ENSSSCG00000049177	286.775	9.82867	1.68547	5.8314	5.4965e-09	2.07046e-07
CvsSt	ENSSSCG00000049325	15.5045	3.33211	0.869963	3.83018	0.00012805	0.0010301
CvsSt	ENSSSCG00000049340	17.8934	7.24283	1.6049	4.51296	6.39298e-06	8.65897e-05
CvsSt	ENSSSCG00000049350	8.49243	6.09136	1.71088	3.56037	0.000370337	0.00242564
CvsSt	ENSSSCG00000049358	6.89027	2.79064	1.05053	2.65642	0.00789758	0.0269814
CvsSt	ENSSSCG00000049370	4.9614	5.20608	1.86264	2.795	0.00518999	0.0193884	102160793	ENSSSCG00000049370
CvsSt	ENSSSCG00000049408	18.224	4.36016	1.2091	3.60611	0.000310818	0.00211047
CvsSt	ENSSSCG00000049412	11.6439	4.52643	1.61485	2.80301	0.00506283	0.019037
CvsSt	ENSSSCG00000049432	7.1936	6.04485	1.64392	3.67709	0.000235912	0.00168779
CvsSt	ENSSSCG00000049442	6.16432	3.08337	1.24917	2.46835	0.0135739	0.0409894
CvsSt	ENSSSCG00000049475	22.505	3.28665	0.978551	3.35869	0.000783124	0.0044013
CvsSt	ENSSSCG00000049476	2.96913	4.76173	1.69892	2.80281	0.005066	0.0190451
CvsSt	ENSSSCG00000049480	40.1596	2.20836	0.575362	3.83821	0.000123935	0.00100123
CvsSt	ENSSSCG00000049491	53.4212	4.07737	1.14413	3.56372	0.000365629	0.00240439
CvsSt	ENSSSCG00000049577	15.2731	4.19307	1.28358	3.26669	0.00108811	0.00573033
CvsSt	ENSSSCG00000049578	3.48488	4.85179	1.56953	3.09124	0.00199323	0.00924992
CvsSt	ENSSSCG00000049608	60.1601	2.60345	0.831629	3.13054	0.00174483	0.00836085
CvsSt	ENSSSCG00000049626	2.32443	4.04226	1.6826	2.40239	0.0162883	0.0471464
CvsSt	ENSSSCG00000049641	11.3322	2.1626	0.736094	2.93795	0.00330392	0.0137434
CvsSt	ENSSSCG00000049642	36.8151	4.884	1.19617	4.08301	4.44556e-05	0.000433928
CvsSt	ENSSSCG00000049704	6.51868	5.93607	1.64305	3.61283	0.000302868	0.00206595
CvsSt	ENSSSCG00000049766	104.558	5.99697	1.05828	5.6667	1.45573e-08	4.86473e-07
CvsSt	ENSSSCG00000049777	1.80009	3.87075	1.60183	2.41646	0.0156722	0.0458578
CvsSt	ENSSSCG00000049803	16.3635	5.79424	1.72431	3.36033	0.000778488	0.00438434
CvsSt	ENSSSCG00000049828	16.0803	4.22678	1.15383	3.66325	0.000249033	0.00176348
CvsSt	ENSSSCG00000049869	13.1487	6.41644	1.66331	3.85763	0.00011449	0.00094258
CvsSt	ENSSSCG00000049919	3.42221	4.51141	1.7917	2.51795	0.0118039	0.0368701
CvsSt	ENSSSCG00000049935	7.33643	5.47478	1.65605	3.30593	0.000946625	0.00514358	100156026	TCF24	transcription factor 24 [Source:HGNC Symbol;Acc:HGNC:32275]
CvsSt	ENSSSCG00000049953	10.1944	3.75077	1.51132	2.48179	0.0130724	0.0398425
CvsSt	ENSSSCG00000049975	14.8636	2.44009	0.796416	3.06384	0.00218517	0.00992
CvsSt	ENSSSCG00000050000	194.801	3.78731	0.689139	5.49572	3.89123e-08	1.14713e-06
CvsSt	ENSSSCG00000050064	23.8104	4.11245	1.06787	3.85106	0.000117607	0.000962008
CvsSt	ENSSSCG00000050073	26.5306	2.74505	0.858777	3.19647	0.00139122	0.00696075
CvsSt	ENSSSCG00000050091	5.5978	5.56597	1.59071	3.49905	0.000466918	0.00292556
CvsSt	ENSSSCG00000050099	23.9004	2.37053	0.724365	3.27256	0.00106578	0.00563787
CvsSt	ENSSSCG00000050101	2.33742	4.30687	1.68817	2.5512	0.0107352	0.0342074
CvsSt	ENSSSCG00000050116	5.97796	5.2721	1.72815	3.05073	0.00228287	0.0102483
CvsSt	ENSSSCG00000050134	130.179	3.41961	0.605819	5.64461	1.6556e-08	5.40991e-07
CvsSt	ENSSSCG00000050224	413.494	10.142	1.70924	5.93362	2.96321e-09	1.17938e-07
CvsSt	ENSSSCG00000050243	10.616	3.29503	0.994921	3.31185	0.000926806	0.0050489
CvsSt	ENSSSCG00000050245	9.03703	3.08853	0.968663	3.18844	0.00143041	0.00713514	100153739	ENSSSCG00000050245
CvsSt	ENSSSCG00000050283	3.34821	4.55452	1.8269	2.49303	0.0126657	0.038903
CvsSt	ENSSSCG00000050286	8.11059	2.88686	1.03076	2.80072	0.0050989	0.0191309
CvsSt	ENSSSCG00000050303	6.88483	4.33544	1.824	2.37689	0.0174595	0.0495319
CvsSt	ENSSSCG00000050343	34.1448	7.98187	1.79628	4.44356	8.84831e-06	0.00011214
CvsSt	ENSSSCG00000050347	1001.66	5.20967	0.786199	6.62639	3.43991e-11	2.28345e-09
CvsSt	ENSSSCG00000050351	139.656	2.36875	0.475459	4.98202	6.29231e-07	1.25747e-05
CvsSt	ENSSSCG00000050373	22.3897	7.23165	1.58137	4.57302	4.80751e-06	6.81632e-05
CvsSt	ENSSSCG00000050380	11.0287	6.2928	1.57226	4.00239	6.27046e-05	0.000572881
CvsSt	ENSSSCG00000050398	10.787	2.85023	0.942218	3.02502	0.0024862	0.0109999
CvsSt	ENSSSCG00000050408	29638.2	5.25409	0.66485	7.90267	2.72989e-15	3.95625e-13	396560	PSORS1C2	psoriasis susceptibility 1 candidate 2 [Source:NCBI gene (formerly Entrezgene);Acc:396560]
CvsSt	ENSSSCG00000050429	50.8132	4.73156	0.800418	5.91136	3.39296e-09	1.3392e-07	104797361	ssc-mir-9829	ssc-mir-9829 [Source:miRBase;Acc:MI0031598]
CvsSt	ENSSSCG00000050459	65.3163	4.32261	1.06649	4.05312	5.05401e-05	0.000481674
CvsSt	ENSSSCG00000050462	183.621	10.5951	1.7312	6.12008	9.35262e-10	4.3097e-08
CvsSt	ENSSSCG00000050500	14.8263	2.58996	0.820516	3.1565	0.00159676	0.00779294
CvsSt	ENSSSCG00000050519	6.00515	5.3632	1.58496	3.38381	0.000714863	0.00412388
CvsSt	ENSSSCG00000050531	1358.17	11.9082	1.69318	7.03305	2.0207e-12	1.81816e-10
CvsSt	ENSSSCG00000050547	2.65061	4.48245	1.61975	2.76737	0.00565111	0.0207357
CvsSt	ENSSSCG00000050550	44.0156	2.28261	0.631565	3.61421	0.000301265	0.00205664
CvsSt	ENSSSCG00000050586	293.376	11.1056	1.6835	6.59671	4.20378e-11	2.72385e-09
CvsSt	ENSSSCG00000050648	65.8662	3.13657	0.931482	3.36729	0.000759103	0.00430508
CvsSt	ENSSSCG00000050692	10.7792	2.83982	1.00513	2.82533	0.00472322	0.0180499
CvsSt	ENSSSCG00000050771	63.5993	3.94709	0.928423	4.2514	2.1244e-05	0.000235445
CvsSt	ENSSSCG00000050773	4.07093	4.45186	1.75917	2.53066	0.0113847	0.0358439
CvsSt	ENSSSCG00000050826	4.4761	4.12125	1.7119	2.40742	0.0160656	0.0467028
CvsSt	ENSSSCG00000050829	5.70623	5.47655	1.67127	3.27688	0.00104962	0.0055787
CvsSt	ENSSSCG00000050892	6.03153	4.00041	1.59768	2.50389	0.0122835	0.0380056
CvsSt	ENSSSCG00000050948	7.66457	2.50788	0.959211	2.61452	0.00893519	0.029672
CvsSt	ENSSSCG00000050949	10.2859	2.61636	0.911563	2.8702	0.00410217	0.0162189
CvsSt	ENSSSCG00000050989	3.70434	4.6454	1.52679	3.0426	0.00234541	0.0104796
CvsSt	ENSSSCG00000050998	2.82455	4.3174	1.61574	2.67208	0.00753821	0.0260158
CvsSt	ENSSSCG00000051009	2.5399	4.23251	1.67271	2.53033	0.0113956	0.0358484
CvsSt	ENSSSCG00000051018	8.83612	2.47382	0.958453	2.58105	0.00985004	0.0320046
CvsSt	ENSSSCG00000051032	55.4934	2.08483	0.572314	3.64282	0.000269673	0.00188226
CvsSt	ENSSSCG00000051040	25.2327	7.45268	1.68983	4.41031	1.03224e-05	0.000128086
CvsSt	ENSSSCG00000051145	3.6573	4.54676	1.72174	2.64079	0.00827135	0.0279912
CvsSt	ENSSSCG00000051165	11.4486	3.65208	1.24087	2.94315	0.00324889	0.0135949
CvsSt	ENSSSCG00000051172	18.8451	3.57989	0.896802	3.99184	6.55629e-05	0.000593003
CvsSt	ENSSSCG00000051178	7.56769	6.10441	1.59609	3.82461	0.00013098	0.00104701
CvsSt	ENSSSCG00000051187	4.87446	5.28363	1.69777	3.11211	0.00185758	0.00875743	110261376	ENSSSCG00000051187
CvsSt	ENSSSCG00000051196	92.5609	3.96673	0.696458	5.69557	1.22962e-08	4.1761e-07
CvsSt	ENSSSCG00000051203	5.58483	4.89398	1.70675	2.86743	0.00413819	0.0163098
CvsSt	ENSSSCG00000051209	4.49746	5.33789	1.78942	2.98303	0.00285412	0.0122564
CvsSt	ENSSSCG00000051214	78.9627	5.93769	1.1989	4.95263	7.32178e-07	1.42514e-05
CvsSt	ENSSSCG00000051218	22.9023	3.78971	1.17435	3.22708	0.00125062	0.00639629
CvsSt	ENSSSCG00000051238	53.2171	3.15548	0.676081	4.66731	3.05163e-06	4.68732e-05
CvsSt	ENSSSCG00000051268	4.45115	4.85824	1.77165	2.74222	0.00610262	0.0220137
[truncated: 556 more rows]
