# Supplementary material for: Altered hair root gene expression profiles highlight calcium signaling and lipid metabolism pathways to be associated with curly hair initiation and maintenance in Mangalitza pigs
Source: Front Genet. 2023 Jun 7;14:1184015. doi: 10.3389/fgene.2023.1184015 (PMC10282778; doi:10.3389/fgene.2023.1184015)
Supplement: Supplementary file 2 [file Table3.XLSX]

## Sheet: Sheet1
Table S3 Complete list of transcripts assigned to differentially expressed genes from CvsSt analysis. Differentially upregulated and downregulated genes are presented with their Ensembl ID and their unique transcript identifier and predicted transcripts assigned by Cufflinks tool.
Ensembl ID	Status	Transcripts ID	Chromosome	Strand	Start	End	Transcript name	Number of exons	Length	Cufflinks gene ID	Gene name	Description
ENSSSCG00000046524	Upregulated	67316	4	+	96349550	96351589	TCONS_00147445	2	1563	XLOC_040010	PRR9	proline rich 9 [Source:HGNC Symbol;Acc:HGNC:32057]
ENSSSCG00000046524	Upregulated	67317	4	+	96349550	96351589	TCONS_00147446	4	1520	XLOC_040010	PRR9	proline rich 9 [Source:HGNC Symbol;Acc:HGNC:32057]
ENSSSCG00000046524	Upregulated	67318	4	-	96349554	96351266	TCONS_00154062	2	1425	XLOC_041789	PRR9	proline rich 9 [Source:HGNC Symbol;Acc:HGNC:32057]
ENSSSCG00000046524	Upregulated	67319	4	+	96349569	96351264	TCONS_00147447	3	1351	XLOC_040010	PRR9	proline rich 9 [Source:HGNC Symbol;Acc:HGNC:32057]
ENSSSCG00000046524	Upregulated	67320	4	-	96350453	96350803	TCONS_00154063	1	351	XLOC_041789	PRR9	proline rich 9 [Source:HGNC Symbol;Acc:HGNC:32057]
ENSSSCG00000017438	Upregulated	158110	12	+	21165836	21171924	TCONS_00036767	7	2577	XLOC_010555	KRT35	keratin 35 [Source:VGNC Symbol;Acc:VGNC:89588]
ENSSSCG00000017438	Upregulated	158111	12	-	21166966	21171894	TCONS_00042789	7	1417	XLOC_012006	KRT35	keratin 35 [Source:VGNC Symbol;Acc:VGNC:89588]
ENSSSCG00000021755	Upregulated	158127	12	+	21235248	21242549	TCONS_00036776	8	1582	XLOC_010560	ENSSSCG00000021755
ENSSSCG00000021755	Upregulated	158128	12	-	21241118	21242529	TCONS_00042797	2	501	XLOC_012013	ENSSSCG00000021755
ENSSSCG00000008617	Upregulated	57423	3	-	120968053	121070840	TCONS_00142457	11	5516	XLOC_038594	CYRIA	CYFIP related Rac1 interactor A [Source:VGNC Symbol;Acc:VGNC:87131]
ENSSSCG00000008617	Upregulated	57424	3	-	120968053	121070840	TCONS_00142458	12	5647	XLOC_038594	CYRIA	CYFIP related Rac1 interactor A [Source:VGNC Symbol;Acc:VGNC:87131]
ENSSSCG00000008617	Upregulated	57425	3	-	120968053	121070840	TCONS_00142459	13	5590	XLOC_038594	CYRIA	CYFIP related Rac1 interactor A [Source:VGNC Symbol;Acc:VGNC:87131]
ENSSSCG00000008617	Upregulated	57426	3	-	120968053	121078703	TCONS_00142460	13	4188	XLOC_038594	CYRIA	CYFIP related Rac1 interactor A [Source:VGNC Symbol;Acc:VGNC:87131]
ENSSSCG00000008617	Upregulated	57427	3	-	120968053	121148011	TCONS_00142461	13	4207	XLOC_038594	CYRIA	CYFIP related Rac1 interactor A [Source:VGNC Symbol;Acc:VGNC:87131]
ENSSSCG00000008617	Upregulated	57428	3	-	120968053	121174714	TCONS_00142462	12	4117	XLOC_038594	CYRIA	CYFIP related Rac1 interactor A [Source:VGNC Symbol;Acc:VGNC:87131]
ENSSSCG00000008617	Upregulated	57429	3	-	120968053	121314605	TCONS_00142463	12	4068	XLOC_038594	CYRIA	CYFIP related Rac1 interactor A [Source:VGNC Symbol;Acc:VGNC:87131]
ENSSSCG00000008617	Upregulated	57430	3	-	120968053	121314605	TCONS_00142464	13	4191	XLOC_038594	CYRIA	CYFIP related Rac1 interactor A [Source:VGNC Symbol;Acc:VGNC:87131]
ENSSSCG00000008617	Upregulated	57431	3	-	120968053	121337777	TCONS_00142465	13	4193	XLOC_038594	CYRIA	CYFIP related Rac1 interactor A [Source:VGNC Symbol;Acc:VGNC:87131]
ENSSSCG00000008617	Upregulated	57432	3	+	120968060	121069242	TCONS_00134137	14	3717	XLOC_036495	CYRIA	CYFIP related Rac1 interactor A [Source:VGNC Symbol;Acc:VGNC:87131]
ENSSSCG00000008617	Upregulated	57433	3	+	120968060	121071020	TCONS_00134138	13	5911	XLOC_036495	CYRIA	CYFIP related Rac1 interactor A [Source:VGNC Symbol;Acc:VGNC:87131]
ENSSSCG00000008617	Upregulated	57434	3	+	120968060	121071020	TCONS_00134139	14	6141	XLOC_036495	CYRIA	CYFIP related Rac1 interactor A [Source:VGNC Symbol;Acc:VGNC:87131]
ENSSSCG00000008617	Upregulated	57435	3	+	120968060	121071020	TCONS_00134140	15	5877	XLOC_036495	CYRIA	CYFIP related Rac1 interactor A [Source:VGNC Symbol;Acc:VGNC:87131]
ENSSSCG00000008617	Upregulated	57436	3	+	120968060	121071020	TCONS_00134141	14	9130	XLOC_036495	CYRIA	CYFIP related Rac1 interactor A [Source:VGNC Symbol;Acc:VGNC:87131]
ENSSSCG00000008617	Upregulated	57437	3	+	120968060	121071020	TCONS_00134142	14	5495	XLOC_036495	CYRIA	CYFIP related Rac1 interactor A [Source:VGNC Symbol;Acc:VGNC:87131]
ENSSSCG00000008617	Upregulated	57438	3	+	120968060	121071020	TCONS_00134143	13	6205	XLOC_036495	CYRIA	CYFIP related Rac1 interactor A [Source:VGNC Symbol;Acc:VGNC:87131]
ENSSSCG00000008617	Upregulated	57439	3	+	120968060	121071020	TCONS_00134144	12	5820	XLOC_036495	CYRIA	CYFIP related Rac1 interactor A [Source:VGNC Symbol;Acc:VGNC:87131]
ENSSSCG00000008617	Upregulated	57440	3	+	120968060	121071020	TCONS_00134145	13	5762	XLOC_036495	CYRIA	CYFIP related Rac1 interactor A [Source:VGNC Symbol;Acc:VGNC:87131]
ENSSSCG00000008617	Upregulated	57441	3	+	120968060	121071020	TCONS_00134146	13	5552	XLOC_036495	CYRIA	CYFIP related Rac1 interactor A [Source:VGNC Symbol;Acc:VGNC:87131]
ENSSSCG00000008617	Upregulated	57442	3	+	120968060	121071020	TCONS_00134147	11	5740	XLOC_036495	CYRIA	CYFIP related Rac1 interactor A [Source:VGNC Symbol;Acc:VGNC:87131]
ENSSSCG00000008617	Upregulated	57443	3	+	120968079	121067053	TCONS_00134148	12	5472	XLOC_036495	CYRIA	CYFIP related Rac1 interactor A [Source:VGNC Symbol;Acc:VGNC:87131]
ENSSSCG00000008617	Upregulated	57444	3	+	121011423	121034227	TCONS_00134149	2	1275	XLOC_036496	CYRIA	CYFIP related Rac1 interactor A [Source:VGNC Symbol;Acc:VGNC:87131]
ENSSSCG00000008617	Upregulated	57445	3	+	121031828	121071020	TCONS_00134150	11	5649	XLOC_036495	CYRIA	CYFIP related Rac1 interactor A [Source:VGNC Symbol;Acc:VGNC:87131]
ENSSSCG00000008617	Upregulated	57446	3	+	121031841	121071020	TCONS_00134151	12	5571	XLOC_036495	CYRIA	CYFIP related Rac1 interactor A [Source:VGNC Symbol;Acc:VGNC:87131]
ENSSSCG00000008617	Upregulated	57447	3	+	121034614	121071020	TCONS_00134152	11	5634	XLOC_036495	CYRIA	CYFIP related Rac1 interactor A [Source:VGNC Symbol;Acc:VGNC:87131]
ENSSSCG00000008617	Upregulated	57448	3	+	121034615	121071020	TCONS_00134153	12	5568	XLOC_036495	CYRIA	CYFIP related Rac1 interactor A [Source:VGNC Symbol;Acc:VGNC:87131]
ENSSSCG00000008617	Upregulated	57449	3	+	121051051	121071020	TCONS_00134154	10	5584	XLOC_036495	CYRIA	CYFIP related Rac1 interactor A [Source:VGNC Symbol;Acc:VGNC:87131]
ENSSSCG00000008617	Upregulated	57450	3	+	121057418	121071020	TCONS_00134155	9	5266	XLOC_036495	CYRIA	CYFIP related Rac1 interactor A [Source:VGNC Symbol;Acc:VGNC:87131]
ENSSSCG00000008617	Upregulated	57451	3	+	121060585	121071020	TCONS_00134156	4	4932	XLOC_036495	CYRIA	CYFIP related Rac1 interactor A [Source:VGNC Symbol;Acc:VGNC:87131]
ENSSSCG00000008617	Upregulated	57452	3	+	121066034	121071020	TCONS_00134157	2	4730	XLOC_036495	CYRIA	CYFIP related Rac1 interactor A [Source:VGNC Symbol;Acc:VGNC:87131]
ENSSSCG00000029297	Upregulated	180936	13	+	193633391	193731583	TCONS_00054143	2	819	XLOC_014975	KRTAP27-1	keratin associated protein 27-1 [Source:VGNC Symbol;Acc:VGNC:89602]
ENSSSCG00000029297	Upregulated	180938	13	+	193645749	193731583	TCONS_00054144	4	1339	XLOC_014975	KRTAP27-1	keratin associated protein 27-1 [Source:VGNC Symbol;Acc:VGNC:89602]
ENSSSCG00000029297	Upregulated	180942	13	+	193652364	193732645	TCONS_00054146	3	1151	XLOC_014975	KRTAP27-1	keratin associated protein 27-1 [Source:VGNC Symbol;Acc:VGNC:89602]
ENSSSCG00000029297	Upregulated	180947	13	-	193729820	193732621	TCONS_00062920	2	1785	XLOC_017270	KRTAP27-1	keratin associated protein 27-1 [Source:VGNC Symbol;Acc:VGNC:89602]
ENSSSCG00000029297	Upregulated	180948	13	+	193729831	193732645	TCONS_00054150	2	1798	XLOC_014975	KRTAP27-1	keratin associated protein 27-1 [Source:VGNC Symbol;Acc:VGNC:89602]
ENSSSCG00000029297	Upregulated	180949	13	+	193729831	193745752	TCONS_00054151	4	1716	XLOC_014975	KRTAP27-1	keratin associated protein 27-1 [Source:VGNC Symbol;Acc:VGNC:89602]
ENSSSCG00000029297	Upregulated	180950	13	-	193730803	193731423	TCONS_00062921	1	621	XLOC_017270	KRTAP27-1	keratin associated protein 27-1 [Source:VGNC Symbol;Acc:VGNC:89602]
ENSSSCG00000030350	Upregulated	158129	12	+	21250443	21255560	TCONS_00036777	7	1700	XLOC_010561	ENSSSCG00000030350
ENSSSCG00000030350	Upregulated	158130	12	+	21250443	21255565	TCONS_00036778	8	1663	XLOC_010561	ENSSSCG00000030350
ENSSSCG00000030350	Upregulated	158131	12	+	21250507	21255136	TCONS_00036779	7	1131	XLOC_010561	ENSSSCG00000030350
ENSSSCG00000030350	Upregulated	158132	12	+	21250507	21255560	TCONS_00036780	6	1597	XLOC_010561	ENSSSCG00000030350
ENSSSCG00000030350	Upregulated	158133	12	-	21254541	21255651	TCONS_00042798	2	705	XLOC_012014	ENSSSCG00000030350
ENSSSCG00000020740	Upregulated	101033	6	+	115286119	115328093	TCONS_00176898	18	6369	XLOC_047872	DSG4	desmoglein 4 [Source:VGNC Symbol;Acc:VGNC:87458]
ENSSSCG00000020740	Upregulated	101035	6	+	115286175	115328093	TCONS_00176899	15	6133	XLOC_047872	DSG4	desmoglein 4 [Source:VGNC Symbol;Acc:VGNC:87458]
ENSSSCG00000020740	Upregulated	101036	6	+	115286175	115328093	TCONS_00176900	18	6341	XLOC_047872	DSG4	desmoglein 4 [Source:VGNC Symbol;Acc:VGNC:87458]
ENSSSCG00000020740	Upregulated	101037	6	+	115289744	115508945	TCONS_00176901	18	4361	XLOC_047872	DSG4	desmoglein 4 [Source:VGNC Symbol;Acc:VGNC:87458]
ENSSSCG00000020740	Upregulated	101038	6	+	115289775	115328093	TCONS_00176902	15	6608	XLOC_047872	DSG4	desmoglein 4 [Source:VGNC Symbol;Acc:VGNC:87458]
ENSSSCG00000020740	Upregulated	101039	6	+	115289852	115328093	TCONS_00176903	18	6489	XLOC_047872	DSG4	desmoglein 4 [Source:VGNC Symbol;Acc:VGNC:87458]
ENSSSCG00000020740	Upregulated	101040	6	-	115289856	115327925	TCONS_00187792	19	6243	XLOC_050644	DSG4	desmoglein 4 [Source:VGNC Symbol;Acc:VGNC:87458]
ENSSSCG00000020740	Upregulated	101041	6	+	115289869	115328093	TCONS_00176904	17	6410	XLOC_047872	DSG4	desmoglein 4 [Source:VGNC Symbol;Acc:VGNC:87458]
ENSSSCG00000020740	Upregulated	101042	6	+	115289885	115328093	TCONS_00176905	17	6526	XLOC_047872	DSG4	desmoglein 4 [Source:VGNC Symbol;Acc:VGNC:87458]
ENSSSCG00000020740	Upregulated	101043	6	+	115289887	115328093	TCONS_00176906	18	6459	XLOC_047872	DSG4	desmoglein 4 [Source:VGNC Symbol;Acc:VGNC:87458]
ENSSSCG00000020740	Upregulated	101044	6	+	115289895	115607702	TCONS_00176907	18	6112	XLOC_047872	DSG4	desmoglein 4 [Source:VGNC Symbol;Acc:VGNC:87458]
ENSSSCG00000020740	Upregulated	101045	6	+	115290154	115324853	TCONS_00176908	16	3129	XLOC_047872	DSG4	desmoglein 4 [Source:VGNC Symbol;Acc:VGNC:87458]
ENSSSCG00000020740	Upregulated	101046	6	+	115290154	115328093	TCONS_00176909	16	6369	XLOC_047872	DSG4	desmoglein 4 [Source:VGNC Symbol;Acc:VGNC:87458]
ENSSSCG00000030461	Upregulated	131751	9	-	26334034	26438210	TCONS_00221064	25	5140	XLOC_060088	HEPHL1	hephaestin like 1 [Source:VGNC Symbol;Acc:VGNC:88848]
ENSSSCG00000030461	Upregulated	131758	9	+	26354106	26438264	TCONS_00214944	22	7179	XLOC_058374	HEPHL1	hephaestin like 1 [Source:VGNC Symbol;Acc:VGNC:88848]
ENSSSCG00000030461	Upregulated	131759	9	+	26354106	26438264	TCONS_00214945	21	7200	XLOC_058374	HEPHL1	hephaestin like 1 [Source:VGNC Symbol;Acc:VGNC:88848]
ENSSSCG00000030461	Upregulated	131761	9	-	26355831	26428887	TCONS_00221069	17	3327	XLOC_060088	HEPHL1	hephaestin like 1 [Source:VGNC Symbol;Acc:VGNC:88848]
ENSSSCG00000030461	Upregulated	131762	9	-	26355831	26438152	TCONS_00221070	19	5605	XLOC_060088	HEPHL1	hephaestin like 1 [Source:VGNC Symbol;Acc:VGNC:88848]
ENSSSCG00000030461	Upregulated	131763	9	-	26355831	26438174	TCONS_00221071	20	5574	XLOC_060088	HEPHL1	hephaestin like 1 [Source:VGNC Symbol;Acc:VGNC:88848]
ENSSSCG00000030461	Upregulated	131764	9	-	26355831	26438222	TCONS_00221072	20	5622	XLOC_060088	HEPHL1	hephaestin like 1 [Source:VGNC Symbol;Acc:VGNC:88848]
ENSSSCG00000030461	Upregulated	131767	9	+	26356145	26438264	TCONS_00214946	19	5187	XLOC_058374	HEPHL1	hephaestin like 1 [Source:VGNC Symbol;Acc:VGNC:88848]
ENSSSCG00000030461	Upregulated	131768	9	+	26356153	26436441	TCONS_00214947	20	3519	XLOC_058374	HEPHL1	hephaestin like 1 [Source:VGNC Symbol;Acc:VGNC:88848]
ENSSSCG00000030461	Upregulated	131769	9	+	26356153	26438264	TCONS_00214948	19	5201	XLOC_058374	HEPHL1	hephaestin like 1 [Source:VGNC Symbol;Acc:VGNC:88848]
ENSSSCG00000030461	Upregulated	131770	9	+	26416332	26438264	TCONS_00214949	8	5475	XLOC_058374	HEPHL1	hephaestin like 1 [Source:VGNC Symbol;Acc:VGNC:88848]
ENSSSCG00000030461	Upregulated	131771	9	-	26416887	26438124	TCONS_00221075	6	4906	XLOC_060088	HEPHL1	hephaestin like 1 [Source:VGNC Symbol;Acc:VGNC:88848]
ENSSSCG00000030461	Upregulated	131772	9	-	26416887	26438136	TCONS_00221076	7	4702	XLOC_060088	HEPHL1	hephaestin like 1 [Source:VGNC Symbol;Acc:VGNC:88848]
ENSSSCG00000030461	Upregulated	131773	9	-	26416887	26438160	TCONS_00221077	7	4827	XLOC_060088	HEPHL1	hephaestin like 1 [Source:VGNC Symbol;Acc:VGNC:88848]
ENSSSCG00000030461	Upregulated	131774	9	-	26416887	26438165	TCONS_00221078	7	4853	XLOC_060088	HEPHL1	hephaestin like 1 [Source:VGNC Symbol;Acc:VGNC:88848]
ENSSSCG00000030461	Upregulated	131775	9	-	26416887	26438174	TCONS_00221079	7	4862	XLOC_060088	HEPHL1	hephaestin like 1 [Source:VGNC Symbol;Acc:VGNC:88848]
ENSSSCG00000030461	Upregulated	131776	9	-	26416887	26438201	TCONS_00221080	8	4861	XLOC_060088	HEPHL1	hephaestin like 1 [Source:VGNC Symbol;Acc:VGNC:88848]
ENSSSCG00000030461	Upregulated	131777	9	+	26416979	26438264	TCONS_00214950	7	4853	XLOC_058374	HEPHL1	hephaestin like 1 [Source:VGNC Symbol;Acc:VGNC:88848]
ENSSSCG00000030461	Upregulated	131778	9	+	26417012	26438264	TCONS_00214951	5	4577	XLOC_058374	HEPHL1	hephaestin like 1 [Source:VGNC Symbol;Acc:VGNC:88848]
ENSSSCG00000026868	Upregulated	177292	13	-	131339778	131346090	TCONS_00061108	1	6313	XLOC_016723	LRRC15	leucine rich repeat containing 15 [Source:VGNC Symbol;Acc:VGNC:98077]
ENSSSCG00000026868	Upregulated	177293	13	+	131339779	131354405	TCONS_00052312	2	6017	XLOC_014446	LRRC15	leucine rich repeat containing 15 [Source:VGNC Symbol;Acc:VGNC:98077]
ENSSSCG00000026868	Upregulated	177294	13	+	131339779	131354706	TCONS_00052313	3	4942	XLOC_014446	LRRC15	leucine rich repeat containing 15 [Source:VGNC Symbol;Acc:VGNC:98077]
ENSSSCG00000026868	Upregulated	177295	13	+	131339779	131354706	TCONS_00052314	4	9746	XLOC_014446	LRRC15	leucine rich repeat containing 15 [Source:VGNC Symbol;Acc:VGNC:98077]
ENSSSCG00000026868	Upregulated	177296	13	+	131339779	131354706	TCONS_00052315	4	5921	XLOC_014446	LRRC15	leucine rich repeat containing 15 [Source:VGNC Symbol;Acc:VGNC:98077]
ENSSSCG00000026868	Upregulated	177297	13	+	131339779	131354706	TCONS_00052316	3	6087	XLOC_014446	LRRC15	leucine rich repeat containing 15 [Source:VGNC Symbol;Acc:VGNC:98077]
ENSSSCG00000026868	Upregulated	177298	13	+	131339779	131354706	TCONS_00052317	3	3919	XLOC_014446	LRRC15	leucine rich repeat containing 15 [Source:VGNC Symbol;Acc:VGNC:98077]
ENSSSCG00000026868	Upregulated	177299	13	+	131339781	131354706	TCONS_00052318	4	3276	XLOC_014446	LRRC15	leucine rich repeat containing 15 [Source:VGNC Symbol;Acc:VGNC:98077]
ENSSSCG00000026868	Upregulated	177300	13	+	131339781	131354706	TCONS_00052319	3	6254	XLOC_014446	LRRC15	leucine rich repeat containing 15 [Source:VGNC Symbol;Acc:VGNC:98077]
ENSSSCG00000026868	Upregulated	177301	13	+	131339788	131354706	TCONS_00052320	4	5596	XLOC_014446	LRRC15	leucine rich repeat containing 15 [Source:VGNC Symbol;Acc:VGNC:98077]
ENSSSCG00000026868	Upregulated	177302	13	+	131339794	131354706	TCONS_00052321	5	5359	XLOC_014446	LRRC15	leucine rich repeat containing 15 [Source:VGNC Symbol;Acc:VGNC:98077]
ENSSSCG00000026868	Upregulated	177303	13	-	131343940	131345685	TCONS_00061109	1	1746	XLOC_016723	LRRC15	leucine rich repeat containing 15 [Source:VGNC Symbol;Acc:VGNC:98077]
ENSSSCG00000017437	Upregulated	158104	12	+	21152991	21160233	TCONS_00036763	8	1293	XLOC_010554	KRT36	keratin 36 [Source:VGNC Symbol;Acc:VGNC:89589]
ENSSSCG00000017437	Upregulated	158105	12	+	21152991	21160456	TCONS_00036764	10	1200	XLOC_010554	KRT36	keratin 36 [Source:VGNC Symbol;Acc:VGNC:89589]
ENSSSCG00000017437	Upregulated	158106	12	+	21154960	21160233	TCONS_00036765	7	2436	XLOC_010554	KRT36	keratin 36 [Source:VGNC Symbol;Acc:VGNC:89589]
ENSSSCG00000017437	Upregulated	158107	12	+	21154960	21160456	TCONS_00036766	9	2343	XLOC_010554	KRT36	keratin 36 [Source:VGNC Symbol;Acc:VGNC:89589]
ENSSSCG00000017437	Upregulated	158108	12	-	21156117	21159108	TCONS_00042787	5	941	XLOC_012004	KRT36	keratin 36 [Source:VGNC Symbol;Acc:VGNC:89589]
ENSSSCG00000017437	Upregulated	158109	12	-	21159185	21160350	TCONS_00042788	2	544	XLOC_012005	KRT36	keratin 36 [Source:VGNC Symbol;Acc:VGNC:89589]
ENSSSCG00000000240	Upregulated	75372	5	-	17679105	17686677	TCONS_00164133	7	3694	XLOC_044529	KRT85	keratin 85 [Source:HGNC Symbol;Acc:HGNC:6462]
ENSSSCG00000000240	Upregulated	75373	5	-	17679105	17687245	TCONS_00164134	11	2799	XLOC_044529	KRT85	keratin 85 [Source:HGNC Symbol;Acc:HGNC:6462]
ENSSSCG00000000240	Upregulated	75374	5	-	17679105	17687245	TCONS_00164135	10	2324	XLOC_044529	KRT85	keratin 85 [Source:HGNC Symbol;Acc:HGNC:6462]
ENSSSCG00000000240	Upregulated	75375	5	-	17679105	17687245	TCONS_00164136	9	3589	XLOC_044529	KRT85	keratin 85 [Source:HGNC Symbol;Acc:HGNC:6462]
ENSSSCG00000000240	Upregulated	75376	5	-	17679105	17687384	TCONS_00164137	11	2769	XLOC_044529	KRT85	keratin 85 [Source:HGNC Symbol;Acc:HGNC:6462]
ENSSSCG00000000240	Upregulated	75377	5	-	17679105	17690711	TCONS_00164138	12	2311	XLOC_044529	KRT85	keratin 85 [Source:HGNC Symbol;Acc:HGNC:6462]
ENSSSCG00000000240	Upregulated	75378	5	-	17679105	17690711	TCONS_00164139	10	3530	XLOC_044529	KRT85	keratin 85 [Source:HGNC Symbol;Acc:HGNC:6462]
ENSSSCG00000000240	Upregulated	75379	5	-	17679199	17683857	TCONS_00164140	7	1685	XLOC_044529	KRT85	keratin 85 [Source:HGNC Symbol;Acc:HGNC:6462]
ENSSSCG00000000240	Upregulated	75380	5	-	17679199	17686602	TCONS_00164141	11	2235	XLOC_044529	KRT85	keratin 85 [Source:HGNC Symbol;Acc:HGNC:6462]
ENSSSCG00000000240	Upregulated	75381	5	-	17679199	17686677	TCONS_00164142	9	2396	XLOC_044529	KRT85	keratin 85 [Source:HGNC Symbol;Acc:HGNC:6462]
ENSSSCG00000000240	Upregulated	75382	5	+	17679207	17680795	TCONS_00158153	2	1140	XLOC_042883	KRT85	keratin 85 [Source:HGNC Symbol;Acc:HGNC:6462]
ENSSSCG00000000240	Upregulated	75383	5	-	17680605	17687245	TCONS_00164143	11	1299	XLOC_044529	KRT85	keratin 85 [Source:HGNC Symbol;Acc:HGNC:6462]
ENSSSCG00000000240	Upregulated	75384	5	-	17680605	17687384	TCONS_00164144	11	1269	XLOC_044529	KRT85	keratin 85 [Source:HGNC Symbol;Acc:HGNC:6462]
ENSSSCG00000000240	Upregulated	75385	5	-	17680605	17690711	TCONS_00164145	11	1260	XLOC_044529	KRT85	keratin 85 [Source:HGNC Symbol;Acc:HGNC:6462]
ENSSSCG00000000240	Upregulated	75386	5	+	17682097	17686335	TCONS_00158154	6	765	XLOC_042884	KRT85	keratin 85 [Source:HGNC Symbol;Acc:HGNC:6462]
ENSSSCG00000038131	Upregulated	181063	13	-	194454150	194506525	TCONS_00062963	4	718	XLOC_017320	KRTAP11-1	keratin associated protein 11-1 [Source:VGNC Symbol;Acc:VGNC:89600]
ENSSSCG00000038131	Upregulated	181067	13	+	194504370	194506999	TCONS_00054216	1	2630	XLOC_015026	KRTAP11-1	keratin associated protein 11-1 [Source:VGNC Symbol;Acc:VGNC:89600]
ENSSSCG00000038131	Upregulated	181068	13	-	194506052	194506525	TCONS_00062966	1	474	XLOC_017320	KRTAP11-1	keratin associated protein 11-1 [Source:VGNC Symbol;Acc:VGNC:89600]
ENSSSCG00000017441	Upregulated	158123	12	+	21222123	21226968	TCONS_00036775	7	1627	XLOC_010559	ENSSSCG00000017441
ENSSSCG00000017441	Upregulated	158124	12	-	21222132	21225532	TCONS_00042794	5	821	XLOC_012010	ENSSSCG00000017441
ENSSSCG00000017441	Upregulated	158126	12	-	21225964	21226947	TCONS_00042796	2	516	XLOC_012012	ENSSSCG00000017441
ENSSSCG00000021668	Upregulated	158119	12	+	21208856	21213545	TCONS_00036773	9	1215	XLOC_010558	KRT31	keratin 31 [Source:NCBI gene (formerly Entrezgene);Acc:100513946]
ENSSSCG00000021668	Upregulated	158120	12	+	21209793	21213827	TCONS_00036774	7	1588	XLOC_010558	KRT31	keratin 31 [Source:NCBI gene (formerly Entrezgene);Acc:100513946]
ENSSSCG00000021668	Upregulated	158121	12	-	21210152	21212271	TCONS_00042792	5	471	XLOC_012008	KRT31	keratin 31 [Source:NCBI gene (formerly Entrezgene);Acc:100513946]
ENSSSCG00000021668	Upregulated	158122	12	-	21212707	21213828	TCONS_00042793	2	496	XLOC_012009	KRT31	keratin 31 [Source:NCBI gene (formerly Entrezgene);Acc:100513946]
ENSSSCG00000029545	Upregulated	79522	5	-	59519620	59544875	TCONS_00166238	7	3889	XLOC_045101	GPRC5D	G protein-coupled receptor class C group 5 member D [Source:VGNC Symbol;Acc:VGNC:88644]
ENSSSCG00000029545	Upregulated	79531	5	-	59531144	59544866	TCONS_00166242	6	3697	XLOC_045101	GPRC5D	G protein-coupled receptor class C group 5 member D [Source:VGNC Symbol;Acc:VGNC:88644]
ENSSSCG00000029545	Upregulated	79532	5	-	59531144	59544920	TCONS_00166243	5	3236	XLOC_045101	GPRC5D	G protein-coupled receptor class C group 5 member D [Source:VGNC Symbol;Acc:VGNC:88644]
ENSSSCG00000029545	Upregulated	79533	5	-	59531144	59545570	TCONS_00166244	5	4211	XLOC_045101	GPRC5D	G protein-coupled receptor class C group 5 member D [Source:VGNC Symbol;Acc:VGNC:88644]
ENSSSCG00000029545	Upregulated	79534	5	-	59531144	59545604	TCONS_00166245	6	4087	XLOC_045101	GPRC5D	G protein-coupled receptor class C group 5 member D [Source:VGNC Symbol;Acc:VGNC:88644]
ENSSSCG00000029545	Upregulated	79535	5	-	59531144	59545606	TCONS_00166246	4	4179	XLOC_045101	GPRC5D	G protein-coupled receptor class C group 5 member D [Source:VGNC Symbol;Acc:VGNC:88644]
ENSSSCG00000029545	Upregulated	79536	5	-	59531144	59545606	TCONS_00166247	4	4598	XLOC_045101	GPRC5D	G protein-coupled receptor class C group 5 member D [Source:VGNC Symbol;Acc:VGNC:88644]
ENSSSCG00000029545	Upregulated	79537	5	-	59531144	59545645	TCONS_00166248	4	4568	XLOC_045101	GPRC5D	G protein-coupled receptor class C group 5 member D [Source:VGNC Symbol;Acc:VGNC:88644]
ENSSSCG00000029545	Upregulated	79538	5	-	59531144	59545698	TCONS_00166249	4	4880	XLOC_045101	GPRC5D	G protein-coupled receptor class C group 5 member D [Source:VGNC Symbol;Acc:VGNC:88644]
ENSSSCG00000029545	Upregulated	79539	5	-	59531144	59547420	TCONS_00166250	4	7078	XLOC_045101	GPRC5D	G protein-coupled receptor class C group 5 member D [Source:VGNC Symbol;Acc:VGNC:88644]
ENSSSCG00000029545	Upregulated	79540	5	-	59531144	59547420	TCONS_00166251	5	5875	XLOC_045101	GPRC5D	G protein-coupled receptor class C group 5 member D [Source:VGNC Symbol;Acc:VGNC:88644]
ENSSSCG00000029545	Upregulated	79541	5	-	59531144	59547420	TCONS_00166252	4	7087	XLOC_045101	GPRC5D	G protein-coupled receptor class C group 5 member D [Source:VGNC Symbol;Acc:VGNC:88644]
ENSSSCG00000029545	Upregulated	79542	5	-	59531144	59547420	TCONS_00166253	5	7146	XLOC_045101	GPRC5D	G protein-coupled receptor class C group 5 member D [Source:VGNC Symbol;Acc:VGNC:88644]
ENSSSCG00000029545	Upregulated	79543	5	-	59531144	59547420	TCONS_00166254	4	5360	XLOC_045101	GPRC5D	G protein-coupled receptor class C group 5 member D [Source:VGNC Symbol;Acc:VGNC:88644]
ENSSSCG00000029545	Upregulated	79544	5	-	59531144	59547420	TCONS_00166255	5	5428	XLOC_045101	GPRC5D	G protein-coupled receptor class C group 5 member D [Source:VGNC Symbol;Acc:VGNC:88644]
ENSSSCG00000029545	Upregulated	79545	5	-	59531144	59547420	TCONS_00166256	6	7026	XLOC_045101	GPRC5D	G protein-coupled receptor class C group 5 member D [Source:VGNC Symbol;Acc:VGNC:88644]
ENSSSCG00000029545	Upregulated	79546	5	-	59531144	59547420	TCONS_00166257	4	7078	XLOC_045101	GPRC5D	G protein-coupled receptor class C group 5 member D [Source:VGNC Symbol;Acc:VGNC:88644]
ENSSSCG00000029545	Upregulated	79547	5	-	59531144	59547420	TCONS_00166258	4	6343	XLOC_045101	GPRC5D	G protein-coupled receptor class C group 5 member D [Source:VGNC Symbol;Acc:VGNC:88644]
ENSSSCG00000029545	Upregulated	79548	5	-	59531144	59547420	TCONS_00166259	4	6144	XLOC_045101	GPRC5D	G protein-coupled receptor class C group 5 member D [Source:VGNC Symbol;Acc:VGNC:88644]
ENSSSCG00000029545	Upregulated	79552	5	+	59535051	59545416	TCONS_00160201	4	1353	XLOC_043440	GPRC5D	G protein-coupled receptor class C group 5 member D [Source:VGNC Symbol;Acc:VGNC:88644]
ENSSSCG00000029545	Upregulated	79553	5	+	59535089	59545416	TCONS_00160202	3	1247	XLOC_043440	GPRC5D	G protein-coupled receptor class C group 5 member D [Source:VGNC Symbol;Acc:VGNC:88644]
ENSSSCG00000029545	Upregulated	79554	5	+	59535969	59543864	TCONS_00160203	2	1557	XLOC_043440	GPRC5D	G protein-coupled receptor class C group 5 member D [Source:VGNC Symbol;Acc:VGNC:88644]
ENSSSCG00000029545	Upregulated	79555	5	+	59535969	59545410	TCONS_00160204	3	1305	XLOC_043440	GPRC5D	G protein-coupled receptor class C group 5 member D [Source:VGNC Symbol;Acc:VGNC:88644]
ENSSSCG00000029545	Upregulated	79556	5	-	59545028	59547420	TCONS_00166260	2	1791	XLOC_045101	GPRC5D	G protein-coupled receptor class C group 5 member D [Source:VGNC Symbol;Acc:VGNC:88644]
ENSSSCG00000039927	Upregulated	158181	12	+	21469985	21470287	TCONS_00036804	1	303	XLOC_010581	ENSSSCG00000039927
ENSSSCG00000000239	Upregulated	75365	5	-	17635519	17643286	TCONS_00164129	11	1803	XLOC_044528	ENSSSCG00000000239
ENSSSCG00000000239	Upregulated	75366	5	+	17635552	17636045	TCONS_00158150	1	494	XLOC_042880	ENSSSCG00000000239
ENSSSCG00000000239	Upregulated	75367	5	-	17635567	17642700	TCONS_00164130	9	1883	XLOC_044528	ENSSSCG00000000239
ENSSSCG00000000239	Upregulated	75368	5	-	17636499	17642700	TCONS_00164131	9	1373	XLOC_044528	ENSSSCG00000000239
ENSSSCG00000000239	Upregulated	75369	5	-	17636499	17643286	TCONS_00164132	10	1296	XLOC_044528	ENSSSCG00000000239
ENSSSCG00000000239	Upregulated	75370	5	+	17637866	17640216	TCONS_00158151	5	387	XLOC_042881	ENSSSCG00000000239
ENSSSCG00000033235	Upregulated	75337	5	-	17571162	17580145	TCONS_00164112	10	3121	XLOC_044526	ENSSSCG00000033235
ENSSSCG00000033235	Upregulated	75338	5	-	17571162	17580145	TCONS_00164113	11	2751	XLOC_044526	ENSSSCG00000033235
ENSSSCG00000033235	Upregulated	75339	5	-	17571162	17580145	TCONS_00164114	10	2760	XLOC_044526	ENSSSCG00000033235
ENSSSCG00000033235	Upregulated	75340	5	-	17571162	17580145	TCONS_00164115	9	3429	XLOC_044526	ENSSSCG00000033235
ENSSSCG00000033235	Upregulated	75341	5	-	17571162	17580145	TCONS_00164116	7	3537	XLOC_044526	ENSSSCG00000033235
ENSSSCG00000033235	Upregulated	75342	5	-	17571939	17580145	TCONS_00164117	9	2082	XLOC_044526	ENSSSCG00000033235
ENSSSCG00000033235	Upregulated	75343	5	-	17572372	17580145	TCONS_00164118	9	1607	XLOC_044526	ENSSSCG00000033235
ENSSSCG00000033235	Upregulated	75344	5	-	17572820	17579990	TCONS_00164119	10	1308	XLOC_044526	ENSSSCG00000033235
ENSSSCG00000033235	Upregulated	75345	5	-	17572820	17580145	TCONS_00164120	8	1571	XLOC_044526	ENSSSCG00000033235
ENSSSCG00000038114	Upregulated	158174	12	-	21435981	21436850	TCONS_00042819	1	870	XLOC_012035	ENSSSCG00000038114
ENSSSCG00000038114	Upregulated	158175	12	+	21436036	21436518	TCONS_00036801	2	399	XLOC_010578	ENSSSCG00000038114
ENSSSCG00000046207	Upregulated	158156	12	+	21340741	21347246	TCONS_00036793	1	6506	XLOC_010570	ENSSSCG00000046207
ENSSSCG00000031359	Upregulated	86425	6	+	18610593	18613967	TCONS_00169638	3	1120	XLOC_046082	MT4	metallothionein 4 [Source:VGNC Symbol;Acc:VGNC:90433]
ENSSSCG00000031359	Upregulated	86426	6	-	18610722	18618563	TCONS_00180466	5	4481	XLOC_048842	MT4	metallothionein 4 [Source:VGNC Symbol;Acc:VGNC:90433]
ENSSSCG00000031359	Upregulated	86427	6	-	18610722	18618563	TCONS_00180467	4	5190	XLOC_048842	MT4	metallothionein 4 [Source:VGNC Symbol;Acc:VGNC:90433]
ENSSSCG00000031359	Upregulated	86428	6	-	18611294	18615177	TCONS_00180468	3	144	XLOC_048842	MT4	metallothionein 4 [Source:VGNC Symbol;Acc:VGNC:90433]
ENSSSCG00000031359	Upregulated	86429	6	-	18611294	18634376	TCONS_00180469	3	150	XLOC_048842	MT4	metallothionein 4 [Source:VGNC Symbol;Acc:VGNC:90433]
ENSSSCG00000031359	Upregulated	86430	6	+	18613179	18613967	TCONS_00169639	2	264	XLOC_046082	MT4	metallothionein 4 [Source:VGNC Symbol;Acc:VGNC:90433]
ENSSSCG00000023788	Upregulated	77239	5	+	29193051	29242178	TCONS_00159047	2	818	XLOC_043116	ENSSSCG00000023788	TBC1 domain family member 30 [Source:VGNC Symbol;Acc:VGNC:93775]
ENSSSCG00000023788	Upregulated	77240	5	+	29195294	29247970	TCONS_00159048	2	559	XLOC_043117	ENSSSCG00000023788	TBC1 domain family member 30 [Source:VGNC Symbol;Acc:VGNC:93775]
ENSSSCG00000023788	Upregulated	77242	5	+	29206201	29295892	TCONS_00159050	14	3041	XLOC_043119	ENSSSCG00000023788	TBC1 domain family member 30 [Source:VGNC Symbol;Acc:VGNC:93775]
ENSSSCG00000023788	Upregulated	77243	5	+	29206201	29298397	TCONS_00159051	13	5486	XLOC_043119	ENSSSCG00000023788	TBC1 domain family member 30 [Source:VGNC Symbol;Acc:VGNC:93775]
ENSSSCG00000023788	Upregulated	77244	5	+	29206201	29298411	TCONS_00159052	14	5560	XLOC_043119	ENSSSCG00000023788	TBC1 domain family member 30 [Source:VGNC Symbol;Acc:VGNC:93775]
ENSSSCG00000023788	Upregulated	77245	5	-	29206572	29303955	TCONS_00165103	13	1520	XLOC_044767	ENSSSCG00000023788	TBC1 domain family member 30 [Source:VGNC Symbol;Acc:VGNC:93775]
ENSSSCG00000023788	Upregulated	77246	5	+	29206934	29298411	TCONS_00159053	13	5030	XLOC_043119	ENSSSCG00000023788	TBC1 domain family member 30 [Source:VGNC Symbol;Acc:VGNC:93775]
ENSSSCG00000023788	Upregulated	77247	5	-	29248073	29298375	TCONS_00165104	12	5153	XLOC_044767	ENSSSCG00000023788	TBC1 domain family member 30 [Source:VGNC Symbol;Acc:VGNC:93775]
ENSSSCG00000023788	Upregulated	77248	5	-	29248073	29298392	TCONS_00165105	13	5228	XLOC_044767	ENSSSCG00000023788	TBC1 domain family member 30 [Source:VGNC Symbol;Acc:VGNC:93775]
ENSSSCG00000023788	Upregulated	77249	5	-	29248073	29298392	TCONS_00165106	13	5143	XLOC_044767	ENSSSCG00000023788	TBC1 domain family member 30 [Source:VGNC Symbol;Acc:VGNC:93775]
ENSSSCG00000023788	Upregulated	77250	5	-	29248073	29298581	TCONS_00165107	12	5400	XLOC_044767	ENSSSCG00000023788	TBC1 domain family member 30 [Source:VGNC Symbol;Acc:VGNC:93775]
ENSSSCG00000023788	Upregulated	77252	5	+	29248082	29298406	TCONS_00159054	12	5288	XLOC_043119	ENSSSCG00000023788	TBC1 domain family member 30 [Source:VGNC Symbol;Acc:VGNC:93775]
ENSSSCG00000023788	Upregulated	77253	5	-	29251387	29298380	TCONS_00165109	12	4813	XLOC_044767	ENSSSCG00000023788	TBC1 domain family member 30 [Source:VGNC Symbol;Acc:VGNC:93775]
ENSSSCG00000023788	Upregulated	77254	5	+	29251391	29298411	TCONS_00159055	12	4840	XLOC_043119	ENSSSCG00000023788	TBC1 domain family member 30 [Source:VGNC Symbol;Acc:VGNC:93775]
ENSSSCG00000023788	Upregulated	77255	5	+	29251703	29298411	TCONS_00159056	10	4635	XLOC_043119	ENSSSCG00000023788	TBC1 domain family member 30 [Source:VGNC Symbol;Acc:VGNC:93775]
ENSSSCG00000023788	Upregulated	77256	5	+	29257445	29475004	TCONS_00159057	2	2807	XLOC_043120	ENSSSCG00000023788	TBC1 domain family member 30 [Source:VGNC Symbol;Acc:VGNC:93775]
ENSSSCG00000023788	Upregulated	77257	5	-	29258351	29298375	TCONS_00165110	9	4535	XLOC_044767	ENSSSCG00000023788	TBC1 domain family member 30 [Source:VGNC Symbol;Acc:VGNC:93775]
ENSSSCG00000023788	Upregulated	77258	5	-	29258644	29292530	TCONS_00165111	8	1806	XLOC_044767	ENSSSCG00000023788	TBC1 domain family member 30 [Source:VGNC Symbol;Acc:VGNC:93775]
ENSSSCG00000023788	Upregulated	77259	5	-	29265313	29360523	TCONS_00165112	2	568	XLOC_044768	ENSSSCG00000023788	TBC1 domain family member 30 [Source:VGNC Symbol;Acc:VGNC:93775]
ENSSSCG00000025597	Upregulated	75356	5	+	17623592	17628722	TCONS_00158142	10	1368	XLOC_042879	ENSSSCG00000025597
ENSSSCG00000025597	Upregulated	75357	5	+	17623592	17628722	TCONS_00158143	9	1419	XLOC_042879	ENSSSCG00000025597
ENSSSCG00000025597	Upregulated	75358	5	+	17623592	17628797	TCONS_00158144	9	1158	XLOC_042879	ENSSSCG00000025597
ENSSSCG00000025597	Upregulated	75359	5	+	17623592	17628984	TCONS_00158145	10	1299	XLOC_042879	ENSSSCG00000025597
ENSSSCG00000025597	Upregulated	75360	5	+	17623592	17631108	TCONS_00158146	11	1965	XLOC_042879	ENSSSCG00000025597
ENSSSCG00000025597	Upregulated	75361	5	+	17624103	17628797	TCONS_00158147	8	1248	XLOC_042879	ENSSSCG00000025597
ENSSSCG00000025597	Upregulated	75362	5	+	17624103	17628984	TCONS_00158148	9	1389	XLOC_042879	ENSSSCG00000025597
ENSSSCG00000025597	Upregulated	75363	5	+	17624175	17631108	TCONS_00158149	9	2034	XLOC_042879	ENSSSCG00000025597
ENSSSCG00000025597	Upregulated	75364	5	-	17628300	17631100	TCONS_00164128	3	834	XLOC_044518	ENSSSCG00000025597
ENSSSCG00000022657	Upregulated	75349	5	-	17609040	17614052	TCONS_00164121	10	1467	XLOC_044527	ENSSSCG00000022657
ENSSSCG00000022657	Upregulated	75350	5	-	17609040	17614052	TCONS_00164122	11	1470	XLOC_044527	ENSSSCG00000022657
ENSSSCG00000022657	Upregulated	75351	5	-	17609040	17614052	TCONS_00164123	12	1553	XLOC_044527	ENSSSCG00000022657
ENSSSCG00000022657	Upregulated	75352	5	-	17609040	17614052	TCONS_00164124	10	1521	XLOC_044527	ENSSSCG00000022657
ENSSSCG00000022657	Upregulated	75353	5	-	17609040	17614052	TCONS_00164125	9	1563	XLOC_044527	ENSSSCG00000022657
ENSSSCG00000022657	Upregulated	75354	5	-	17609040	17614052	TCONS_00164126	9	1509	XLOC_044527	ENSSSCG00000022657
ENSSSCG00000022657	Upregulated	75355	5	-	17609531	17614052	TCONS_00164127	9	1425	XLOC_044527	ENSSSCG00000022657
ENSSSCG00000017458	Upregulated	158180	12	-	21469934	21581785	TCONS_00042822	2	665	XLOC_012038	KRT39	keratin 39 [Source:VGNC Symbol;Acc:VGNC:89590]
ENSSSCG00000017458	Upregulated	158183	12	+	21492452	21500421	TCONS_00036806	7	1532	XLOC_010583	KRT39	keratin 39 [Source:VGNC Symbol;Acc:VGNC:89590]
ENSSSCG00000033590	Upregulated	108745	7	+	23817640	23828758	TCONS_00191709	6	2346	XLOC_051805	ENSSSCG00000033590	lymphocyte antigen 6 family member G6F [Source:NCBI gene (formerly Entrezgene);Acc:100271881]
ENSSSCG00000033590	Upregulated	108746	7	+	23817653	23822382	TCONS_00191710	6	1145	XLOC_051805	ENSSSCG00000033590	lymphocyte antigen 6 family member G6F [Source:NCBI gene (formerly Entrezgene);Acc:100271881]
ENSSSCG00000033590	Upregulated	108747	7	+	23818871	23828758	TCONS_00191711	5	1006	XLOC_051805	ENSSSCG00000033590	lymphocyte antigen 6 family member G6F [Source:NCBI gene (formerly Entrezgene);Acc:100271881]
ENSSSCG00000033590	Upregulated	108759	7	+	23826822	23828758	TCONS_00191715	3	593	XLOC_051805	ENSSSCG00000033590	lymphocyte antigen 6 family member G6F [Source:NCBI gene (formerly Entrezgene);Acc:100271881]
ENSSSCG00000033590	Upregulated	108760	7	+	23826822	23831619	TCONS_00191716	5	3004	XLOC_051805	ENSSSCG00000033590	lymphocyte antigen 6 family member G6F [Source:NCBI gene (formerly Entrezgene);Acc:100271881]
ENSSSCG00000034519	Upregulated	12143	1	+	158091113	158113790	TCONS_00005929	9	1617	XLOC_001643	SERPINB13	serpin family B member 13 [Source:VGNC Symbol;Acc:VGNC:92736]
ENSSSCG00000034519	Upregulated	12149	1	-	158098381	158108326	TCONS_00017130	5	4784	XLOC_004722	SERPINB13	serpin family B member 13 [Source:VGNC Symbol;Acc:VGNC:92736]
ENSSSCG00000034519	Upregulated	12150	1	-	158098381	158108519	TCONS_00017131	5	4198	XLOC_004722	SERPINB13	serpin family B member 13 [Source:VGNC Symbol;Acc:VGNC:92736]
ENSSSCG00000034519	Upregulated	12151	1	-	158098381	158108546	TCONS_00017132	6	3049	XLOC_004722	SERPINB13	serpin family B member 13 [Source:VGNC Symbol;Acc:VGNC:92736]
ENSSSCG00000034519	Upregulated	12152	1	-	158098381	158108569	TCONS_00017133	7	3677	XLOC_004722	SERPINB13	serpin family B member 13 [Source:VGNC Symbol;Acc:VGNC:92736]
ENSSSCG00000034519	Upregulated	12153	1	-	158098381	158108572	TCONS_00017134	6	4246	XLOC_004722	SERPINB13	serpin family B member 13 [Source:VGNC Symbol;Acc:VGNC:92736]
ENSSSCG00000034519	Upregulated	12154	1	-	158098381	158108573	TCONS_00017135	5	4269	XLOC_004722	SERPINB13	serpin family B member 13 [Source:VGNC Symbol;Acc:VGNC:92736]
ENSSSCG00000034519	Upregulated	12155	1	-	158098381	158112016	TCONS_00017136	7	4437	XLOC_004722	SERPINB13	serpin family B member 13 [Source:VGNC Symbol;Acc:VGNC:92736]
ENSSSCG00000034519	Upregulated	12156	1	-	158098381	158112113	TCONS_00017137	6	4408	XLOC_004722	SERPINB13	serpin family B member 13 [Source:VGNC Symbol;Acc:VGNC:92736]
ENSSSCG00000034519	Upregulated	12157	1	-	158098381	158112123	TCONS_00017138	9	2913	XLOC_004722	SERPINB13	serpin family B member 13 [Source:VGNC Symbol;Acc:VGNC:92736]
ENSSSCG00000034519	Upregulated	12158	1	-	158098381	158112180	TCONS_00017139	7	4631	XLOC_004722	SERPINB13	serpin family B member 13 [Source:VGNC Symbol;Acc:VGNC:92736]
ENSSSCG00000034519	Upregulated	12159	1	-	158098381	158112497	TCONS_00017140	6	4422	XLOC_004722	SERPINB13	serpin family B member 13 [Source:VGNC Symbol;Acc:VGNC:92736]
ENSSSCG00000034519	Upregulated	12160	1	-	158098381	158112497	TCONS_00017141	6	4964	XLOC_004722	SERPINB13	serpin family B member 13 [Source:VGNC Symbol;Acc:VGNC:92736]
ENSSSCG00000034519	Upregulated	12161	1	-	158098381	158113306	TCONS_00017142	7	4545	XLOC_004722	SERPINB13	serpin family B member 13 [Source:VGNC Symbol;Acc:VGNC:92736]
ENSSSCG00000034519	Upregulated	12162	1	-	158098381	158113501	TCONS_00017143	8	3178	XLOC_004722	SERPINB13	serpin family B member 13 [Source:VGNC Symbol;Acc:VGNC:92736]
ENSSSCG00000034519	Upregulated	12163	1	-	158098381	158113501	TCONS_00017144	8	3288	XLOC_004722	SERPINB13	serpin family B member 13 [Source:VGNC Symbol;Acc:VGNC:92736]
ENSSSCG00000034519	Upregulated	12164	1	-	158098381	158113501	TCONS_00017145	7	3096	XLOC_004722	SERPINB13	serpin family B member 13 [Source:VGNC Symbol;Acc:VGNC:92736]
ENSSSCG00000034519	Upregulated	12165	1	-	158098381	158113501	TCONS_00017146	7	4464	XLOC_004722	SERPINB13	serpin family B member 13 [Source:VGNC Symbol;Acc:VGNC:92736]
ENSSSCG00000034519	Upregulated	12166	1	-	158098381	158113501	TCONS_00017147	8	3195	XLOC_004722	SERPINB13	serpin family B member 13 [Source:VGNC Symbol;Acc:VGNC:92736]
ENSSSCG00000034519	Upregulated	12167	1	-	158098381	158113534	TCONS_00017148	8	3171	XLOC_004722	SERPINB13	serpin family B member 13 [Source:VGNC Symbol;Acc:VGNC:92736]
ENSSSCG00000034519	Upregulated	12168	1	-	158098381	158113536	TCONS_00017149	8	4494	XLOC_004722	SERPINB13	serpin family B member 13 [Source:VGNC Symbol;Acc:VGNC:92736]
ENSSSCG00000034519	Upregulated	12169	1	-	158098381	158113600	TCONS_00017150	8	3237	XLOC_004722	SERPINB13	serpin family B member 13 [Source:VGNC Symbol;Acc:VGNC:92736]
ENSSSCG00000034519	Upregulated	12170	1	-	158098381	158113625	TCONS_00017151	7	3256	XLOC_004722	SERPINB13	serpin family B member 13 [Source:VGNC Symbol;Acc:VGNC:92736]
ENSSSCG00000034519	Upregulated	12171	1	+	158098647	158113790	TCONS_00005935	8	3275	XLOC_001643	SERPINB13	serpin family B member 13 [Source:VGNC Symbol;Acc:VGNC:92736]
ENSSSCG00000034519	Upregulated	12172	1	+	158098651	158113790	TCONS_00005936	9	3192	XLOC_001643	SERPINB13	serpin family B member 13 [Source:VGNC Symbol;Acc:VGNC:92736]
ENSSSCG00000034519	Upregulated	12173	1	+	158098651	158113790	TCONS_00005937	9	3191	XLOC_001643	SERPINB13	serpin family B member 13 [Source:VGNC Symbol;Acc:VGNC:92736]
ENSSSCG00000034519	Upregulated	12174	1	+	158098660	158112525	TCONS_00005938	9	1482	XLOC_001643	SERPINB13	serpin family B member 13 [Source:VGNC Symbol;Acc:VGNC:92736]
ENSSSCG00000034519	Upregulated	12175	1	+	158098683	158108567	TCONS_00005939	6	3310	XLOC_001643	SERPINB13	serpin family B member 13 [Source:VGNC Symbol;Acc:VGNC:92736]
ENSSSCG00000034519	Upregulated	12176	1	+	158098683	158113790	TCONS_00005940	9	1716	XLOC_001643	SERPINB13	serpin family B member 13 [Source:VGNC Symbol;Acc:VGNC:92736]
ENSSSCG00000034519	Upregulated	12177	1	+	158098684	158109749	TCONS_00005941	6	2717	XLOC_001643	SERPINB13	serpin family B member 13 [Source:VGNC Symbol;Acc:VGNC:92736]
ENSSSCG00000034519	Upregulated	12178	1	+	158098695	158112152	TCONS_00005942	9	1444	XLOC_001643	SERPINB13	serpin family B member 13 [Source:VGNC Symbol;Acc:VGNC:92736]
ENSSSCG00000034519	Upregulated	12179	1	+	158098698	158111476	TCONS_00005943	8	2681	XLOC_001643	SERPINB13	serpin family B member 13 [Source:VGNC Symbol;Acc:VGNC:92736]
ENSSSCG00000034519	Upregulated	12180	1	+	158098699	158113790	TCONS_00005944	8	2986	XLOC_001643	SERPINB13	serpin family B member 13 [Source:VGNC Symbol;Acc:VGNC:92736]
ENSSSCG00000034519	Upregulated	12181	1	+	158098700	158113790	TCONS_00005945	7	4990	XLOC_001643	SERPINB13	serpin family B member 13 [Source:VGNC Symbol;Acc:VGNC:92736]
ENSSSCG00000034519	Upregulated	12182	1	+	158098700	158113790	TCONS_00005946	8	4429	XLOC_001643	SERPINB13	serpin family B member 13 [Source:VGNC Symbol;Acc:VGNC:92736]
ENSSSCG00000034519	Upregulated	12183	1	+	158098701	158113790	TCONS_00005947	8	3147	XLOC_001643	SERPINB13	serpin family B member 13 [Source:VGNC Symbol;Acc:VGNC:92736]
ENSSSCG00000034519	Upregulated	12184	1	+	158098702	158113790	TCONS_00005948	9	2991	XLOC_001643	SERPINB13	serpin family B member 13 [Source:VGNC Symbol;Acc:VGNC:92736]
ENSSSCG00000034519	Upregulated	12185	1	+	158098708	158105385	TCONS_00005949	3	4500	XLOC_001643	SERPINB13	serpin family B member 13 [Source:VGNC Symbol;Acc:VGNC:92736]
ENSSSCG00000034519	Upregulated	12186	1	+	158098708	158113790	TCONS_00005950	10	1893	XLOC_001643	SERPINB13	serpin family B member 13 [Source:VGNC Symbol;Acc:VGNC:92736]
ENSSSCG00000034519	Upregulated	12187	1	+	158098708	158113790	TCONS_00005951	8	3792	XLOC_001643	SERPINB13	serpin family B member 13 [Source:VGNC Symbol;Acc:VGNC:92736]
ENSSSCG00000034519	Upregulated	12188	1	+	158098714	158113790	TCONS_00005952	9	3118	XLOC_001643	SERPINB13	serpin family B member 13 [Source:VGNC Symbol;Acc:VGNC:92736]
ENSSSCG00000034519	Upregulated	12189	1	+	158098714	158113790	TCONS_00005953	10	1748	XLOC_001643	SERPINB13	serpin family B member 13 [Source:VGNC Symbol;Acc:VGNC:92736]
ENSSSCG00000034519	Upregulated	12190	1	+	158098718	158108567	TCONS_00005954	8	2681	XLOC_001643	SERPINB13	serpin family B member 13 [Source:VGNC Symbol;Acc:VGNC:92736]
ENSSSCG00000034519	Upregulated	12191	1	+	158098747	158112152	TCONS_00005955	7	4237	XLOC_001643	SERPINB13	serpin family B member 13 [Source:VGNC Symbol;Acc:VGNC:92736]
ENSSSCG00000034519	Upregulated	12192	1	+	158098992	158105385	TCONS_00005956	4	2657	XLOC_001643	SERPINB13	serpin family B member 13 [Source:VGNC Symbol;Acc:VGNC:92736]
ENSSSCG00000034519	Upregulated	12193	1	+	158099594	158112152	TCONS_00005957	9	2033	XLOC_001643	SERPINB13	serpin family B member 13 [Source:VGNC Symbol;Acc:VGNC:92736]
ENSSSCG00000034519	Upregulated	12194	1	-	158099975	158113501	TCONS_00017152	8	1421	XLOC_004722	SERPINB13	serpin family B member 13 [Source:VGNC Symbol;Acc:VGNC:92736]
ENSSSCG00000049072	Upregulated	158176	12	+	21439594	21440121	TCONS_00036802	1	528	XLOC_010579	ENSSSCG00000049072
ENSSSCG00000049072	Upregulated	158177	12	-	21440031	21440740	TCONS_00042820	1	710	XLOC_012036	ENSSSCG00000049072
ENSSSCG00000047892	Upregulated	158137	12	-	21271846	21272269	TCONS_00042800	1	424	XLOC_012016	KRTAP16-1	keratin associated protein 16-1 [Source:HGNC Symbol;Acc:HGNC:18916]
ENSSSCG00000047892	Upregulated	158138	12	+	21272186	21278398	TCONS_00036783	1	6213	XLOC_010562	KRTAP16-1	keratin associated protein 16-1 [Source:HGNC Symbol;Acc:HGNC:18916]
ENSSSCG00000037128	Upregulated	180959	13	+	193747767	193781089	TCONS_00054157	6	2324	XLOC_014984	ENSSSCG00000037128
ENSSSCG00000037128	Upregulated	180960	13	+	193747792	193781089	TCONS_00054158	4	2244	XLOC_014984	ENSSSCG00000037128
ENSSSCG00000037128	Upregulated	180970	13	+	193771238	193781089	TCONS_00054167	7	2222	XLOC_014984	ENSSSCG00000037128
ENSSSCG00000037128	Upregulated	180972	13	+	193778670	193781089	TCONS_00054168	2	2219	XLOC_014984	ENSSSCG00000037128
ENSSSCG00000037128	Upregulated	180973	13	+	193778714	193779232	TCONS_00054169	1	519	XLOC_014984	ENSSSCG00000037128
ENSSSCG00000009148	Upregulated	127185	8	+	113824483	113944098	TCONS_00207831	14	2996	XLOC_056299	LEF1	lymphoid enhancer binding factor 1 [Source:VGNC Symbol;Acc:VGNC:89676]
ENSSSCG00000009148	Upregulated	127186	8	+	113824547	113924950	TCONS_00207832	10	1867	XLOC_056299	LEF1	lymphoid enhancer binding factor 1 [Source:VGNC Symbol;Acc:VGNC:89676]
ENSSSCG00000009148	Upregulated	127187	8	+	113824547	113943623	TCONS_00207833	12	2525	XLOC_056299	LEF1	lymphoid enhancer binding factor 1 [Source:VGNC Symbol;Acc:VGNC:89676]
ENSSSCG00000009148	Upregulated	127188	8	+	113824547	113944098	TCONS_00207834	15	2958	XLOC_056299	LEF1	lymphoid enhancer binding factor 1 [Source:VGNC Symbol;Acc:VGNC:89676]
ENSSSCG00000009148	Upregulated	127189	8	+	113824547	113944098	TCONS_00207835	11	2951	XLOC_056299	LEF1	lymphoid enhancer binding factor 1 [Source:VGNC Symbol;Acc:VGNC:89676]
ENSSSCG00000009148	Upregulated	127190	8	+	113824547	113944098	TCONS_00207836	11	2916	XLOC_056299	LEF1	lymphoid enhancer binding factor 1 [Source:VGNC Symbol;Acc:VGNC:89676]
ENSSSCG00000009148	Upregulated	127191	8	+	113824547	113944098	TCONS_00207837	13	2891	XLOC_056299	LEF1	lymphoid enhancer binding factor 1 [Source:VGNC Symbol;Acc:VGNC:89676]
ENSSSCG00000009148	Upregulated	127192	8	+	113825214	113944070	TCONS_00207838	12	3667	XLOC_056299	LEF1	lymphoid enhancer binding factor 1 [Source:VGNC Symbol;Acc:VGNC:89676]
ENSSSCG00000009148	Upregulated	127193	8	+	113825214	113944098	TCONS_00207839	12	3538	XLOC_056299	LEF1	lymphoid enhancer binding factor 1 [Source:VGNC Symbol;Acc:VGNC:89676]
ENSSSCG00000009148	Upregulated	127194	8	+	113825214	113944098	TCONS_00207840	11	3646	XLOC_056299	LEF1	lymphoid enhancer binding factor 1 [Source:VGNC Symbol;Acc:VGNC:89676]
ENSSSCG00000009148	Upregulated	127195	8	+	113825214	113944098	TCONS_00207841	13	3586	XLOC_056299	LEF1	lymphoid enhancer binding factor 1 [Source:VGNC Symbol;Acc:VGNC:89676]
ENSSSCG00000009148	Upregulated	127196	8	+	113825214	113944098	TCONS_00207842	12	3688	XLOC_056299	LEF1	lymphoid enhancer binding factor 1 [Source:VGNC Symbol;Acc:VGNC:89676]
ENSSSCG00000009148	Upregulated	127197	8	+	113825903	113944077	TCONS_00207843	13	3004	XLOC_056299	LEF1	lymphoid enhancer binding factor 1 [Source:VGNC Symbol;Acc:VGNC:89676]
ENSSSCG00000009148	Upregulated	127198	8	+	113825903	113944078	TCONS_00207844	10	2889	XLOC_056299	LEF1	lymphoid enhancer binding factor 1 [Source:VGNC Symbol;Acc:VGNC:89676]
ENSSSCG00000009148	Upregulated	127199	8	-	113826282	113944021	TCONS_00212652	13	2591	XLOC_057673	LEF1	lymphoid enhancer binding factor 1 [Source:VGNC Symbol;Acc:VGNC:89676]
ENSSSCG00000009148	Upregulated	127200	8	-	113826282	113944055	TCONS_00212653	12	2573	XLOC_057673	LEF1	lymphoid enhancer binding factor 1 [Source:VGNC Symbol;Acc:VGNC:89676]
ENSSSCG00000009148	Upregulated	127201	8	-	113826282	113944066	TCONS_00212654	11	2504	XLOC_057673	LEF1	lymphoid enhancer binding factor 1 [Source:VGNC Symbol;Acc:VGNC:89676]
ENSSSCG00000009148	Upregulated	127202	8	-	113826282	113944067	TCONS_00212655	11	3607	XLOC_057673	LEF1	lymphoid enhancer binding factor 1 [Source:VGNC Symbol;Acc:VGNC:89676]
ENSSSCG00000009148	Upregulated	127203	8	-	113826282	113944074	TCONS_00212656	11	4205	XLOC_057673	LEF1	lymphoid enhancer binding factor 1 [Source:VGNC Symbol;Acc:VGNC:89676]
ENSSSCG00000009148	Upregulated	127204	8	-	113826282	113944076	TCONS_00212657	12	2592	XLOC_057673	LEF1	lymphoid enhancer binding factor 1 [Source:VGNC Symbol;Acc:VGNC:89676]
ENSSSCG00000009148	Upregulated	127205	8	-	113826282	113944078	TCONS_00212658	12	2595	XLOC_057673	LEF1	lymphoid enhancer binding factor 1 [Source:VGNC Symbol;Acc:VGNC:89676]
ENSSSCG00000009148	Upregulated	127206	8	-	113826282	113944078	TCONS_00212659	12	2600	XLOC_057673	LEF1	lymphoid enhancer binding factor 1 [Source:VGNC Symbol;Acc:VGNC:89676]
ENSSSCG00000009148	Upregulated	127207	8	+	113826516	113924950	TCONS_00207845	9	1212	XLOC_056299	LEF1	lymphoid enhancer binding factor 1 [Source:VGNC Symbol;Acc:VGNC:89676]
ENSSSCG00000009148	Upregulated	127208	8	+	113827489	113944078	TCONS_00207846	12	2475	XLOC_056299	LEF1	lymphoid enhancer binding factor 1 [Source:VGNC Symbol;Acc:VGNC:89676]
ENSSSCG00000009148	Upregulated	127209	8	+	113828385	113944098	TCONS_00207847	12	2069	XLOC_056299	LEF1	lymphoid enhancer binding factor 1 [Source:VGNC Symbol;Acc:VGNC:89676]
ENSSSCG00000009148	Upregulated	127210	8	+	113866573	113944098	TCONS_00207848	10	3518	XLOC_056299	LEF1	lymphoid enhancer binding factor 1 [Source:VGNC Symbol;Acc:VGNC:89676]
ENSSSCG00000009148	Upregulated	127211	8	-	113893899	113944063	TCONS_00212660	10	2024	XLOC_057673	LEF1	lymphoid enhancer binding factor 1 [Source:VGNC Symbol;Acc:VGNC:89676]
ENSSSCG00000009148	Upregulated	127212	8	+	113893902	113944098	TCONS_00207849	10	2056	XLOC_056299	LEF1	lymphoid enhancer binding factor 1 [Source:VGNC Symbol;Acc:VGNC:89676]
ENSSSCG00000009148	Upregulated	127213	8	+	113893961	113924950	TCONS_00207850	8	844	XLOC_056299	LEF1	lymphoid enhancer binding factor 1 [Source:VGNC Symbol;Acc:VGNC:89676]
ENSSSCG00000009148	Upregulated	127214	8	+	113900679	113944098	TCONS_00207851	11	1866	XLOC_056299	LEF1	lymphoid enhancer binding factor 1 [Source:VGNC Symbol;Acc:VGNC:89676]
ENSSSCG00000009148	Upregulated	127215	8	-	113907420	113944070	TCONS_00212661	10	1973	XLOC_057673	LEF1	lymphoid enhancer binding factor 1 [Source:VGNC Symbol;Acc:VGNC:89676]
ENSSSCG00000009148	Upregulated	127216	8	+	113907923	113944098	TCONS_00207852	10	1904	XLOC_056299	LEF1	lymphoid enhancer binding factor 1 [Source:VGNC Symbol;Acc:VGNC:89676]
ENSSSCG00000009148	Upregulated	127217	8	+	113912088	113944098	TCONS_00207853	8	1868	XLOC_056299	LEF1	lymphoid enhancer binding factor 1 [Source:VGNC Symbol;Acc:VGNC:89676]
ENSSSCG00000009148	Upregulated	127218	8	-	113922064	113944074	TCONS_00212662	5	1406	XLOC_057673	LEF1	lymphoid enhancer binding factor 1 [Source:VGNC Symbol;Acc:VGNC:89676]
ENSSSCG00000039008	Upregulated	158136	12	+	21271580	21380023	TCONS_00036782	2	2796	XLOC_010562	ENSSSCG00000039008
ENSSSCG00000039008	Upregulated	158145	12	+	21309675	21324014	TCONS_00036787	4	504	XLOC_010566	ENSSSCG00000039008
ENSSSCG00000039008	Upregulated	158146	12	+	21309675	21324518	TCONS_00036788	5	507	XLOC_010566	ENSSSCG00000039008
ENSSSCG00000039008	Upregulated	158147	12	+	21309827	21324518	TCONS_00036789	4	657	XLOC_010566	ENSSSCG00000039008
ENSSSCG00000039008	Upregulated	158149	12	-	21323971	21324467	TCONS_00042805	1	497	XLOC_012021	ENSSSCG00000039008
ENSSSCG00000004712	Upregulated	9589	1	-	128153818	128185125	TCONS_00015795	12	2849	XLOC_004399	TGM7	transglutaminase 7 [Source:VGNC Symbol;Acc:VGNC:93938]
ENSSSCG00000004712	Upregulated	9590	1	-	128153818	128186065	TCONS_00015796	13	2864	XLOC_004399	TGM7	transglutaminase 7 [Source:VGNC Symbol;Acc:VGNC:93938]
ENSSSCG00000004712	Upregulated	9591	1	-	128153818	128186176	TCONS_00015797	12	3756	XLOC_004399	TGM7	transglutaminase 7 [Source:VGNC Symbol;Acc:VGNC:93938]
ENSSSCG00000004712	Upregulated	9592	1	-	128153818	128186176	TCONS_00015798	12	3695	XLOC_004399	TGM7	transglutaminase 7 [Source:VGNC Symbol;Acc:VGNC:93938]
ENSSSCG00000004712	Upregulated	9593	1	-	128153818	128186179	TCONS_00015799	14	3322	XLOC_004399	TGM7	transglutaminase 7 [Source:VGNC Symbol;Acc:VGNC:93938]
ENSSSCG00000004712	Upregulated	9594	1	-	128153818	128186186	TCONS_00015800	13	3842	XLOC_004399	TGM7	transglutaminase 7 [Source:VGNC Symbol;Acc:VGNC:93938]
ENSSSCG00000004712	Upregulated	9595	1	-	128153818	128186191	TCONS_00015801	13	4098	XLOC_004399	TGM7	transglutaminase 7 [Source:VGNC Symbol;Acc:VGNC:93938]
ENSSSCG00000004712	Upregulated	9596	1	-	128153818	128186191	TCONS_00015802	12	3765	XLOC_004399	TGM7	transglutaminase 7 [Source:VGNC Symbol;Acc:VGNC:93938]
ENSSSCG00000004712	Upregulated	9597	1	-	128153818	128188234	TCONS_00015803	12	3292	XLOC_004399	TGM7	transglutaminase 7 [Source:VGNC Symbol;Acc:VGNC:93938]
ENSSSCG00000004712	Upregulated	9598	1	-	128153818	128189793	TCONS_00015804	13	4590	XLOC_004399	TGM7	transglutaminase 7 [Source:VGNC Symbol;Acc:VGNC:93938]
ENSSSCG00000004712	Upregulated	9599	1	-	128153818	128189793	TCONS_00015805	14	4917	XLOC_004399	TGM7	transglutaminase 7 [Source:VGNC Symbol;Acc:VGNC:93938]
ENSSSCG00000004712	Upregulated	9600	1	-	128153818	128189793	TCONS_00015806	10	4164	XLOC_004399	TGM7	transglutaminase 7 [Source:VGNC Symbol;Acc:VGNC:93938]
ENSSSCG00000004712	Upregulated	9601	1	-	128153818	128189793	TCONS_00015807	14	4127	XLOC_004399	TGM7	transglutaminase 7 [Source:VGNC Symbol;Acc:VGNC:93938]
ENSSSCG00000004712	Upregulated	9602	1	-	128153818	128196698	TCONS_00015808	13	5094	XLOC_004399	TGM7	transglutaminase 7 [Source:VGNC Symbol;Acc:VGNC:93938]
ENSSSCG00000004712	Upregulated	9603	1	-	128153818	128196713	TCONS_00015809	13	3450	XLOC_004399	TGM7	transglutaminase 7 [Source:VGNC Symbol;Acc:VGNC:93938]
ENSSSCG00000004712	Upregulated	9608	1	+	128153879	128185824	TCONS_00004722	13	2948	XLOC_001326	TGM7	transglutaminase 7 [Source:VGNC Symbol;Acc:VGNC:93938]
ENSSSCG00000004712	Upregulated	9609	1	+	128153946	128188516	TCONS_00004723	10	3197	XLOC_001326	TGM7	transglutaminase 7 [Source:VGNC Symbol;Acc:VGNC:93938]
ENSSSCG00000004712	Upregulated	9610	1	+	128153961	128189663	TCONS_00004724	13	4277	XLOC_001326	TGM7	transglutaminase 7 [Source:VGNC Symbol;Acc:VGNC:93938]
ENSSSCG00000004712	Upregulated	9611	1	+	128153990	128189663	TCONS_00004725	15	4278	XLOC_001326	TGM7	transglutaminase 7 [Source:VGNC Symbol;Acc:VGNC:93938]
ENSSSCG00000004712	Upregulated	9613	1	+	128154008	128185824	TCONS_00004727	13	3603	XLOC_001326	TGM7	transglutaminase 7 [Source:VGNC Symbol;Acc:VGNC:93938]
ENSSSCG00000004712	Upregulated	9614	1	+	128159562	128184495	TCONS_00004728	13	2133	XLOC_001326	TGM7	transglutaminase 7 [Source:VGNC Symbol;Acc:VGNC:93938]
ENSSSCG00000004712	Upregulated	9615	1	+	128159562	128185122	TCONS_00004729	12	2433	XLOC_001326	TGM7	transglutaminase 7 [Source:VGNC Symbol;Acc:VGNC:93938]
ENSSSCG00000004712	Upregulated	9616	1	+	128159562	128185824	TCONS_00004730	14	3067	XLOC_001326	TGM7	transglutaminase 7 [Source:VGNC Symbol;Acc:VGNC:93938]
ENSSSCG00000004712	Upregulated	9617	1	+	128159562	128188516	TCONS_00004731	14	3815	XLOC_001326	TGM7	transglutaminase 7 [Source:VGNC Symbol;Acc:VGNC:93938]
ENSSSCG00000004712	Upregulated	9619	1	-	128177377	128179416	TCONS_00015813	2	244	XLOC_004400	TGM7	transglutaminase 7 [Source:VGNC Symbol;Acc:VGNC:93938]
ENSSSCG00000004712	Upregulated	9620	1	+	128177465	128179445	TCONS_00004733	2	185	XLOC_001327	TGM7	transglutaminase 7 [Source:VGNC Symbol;Acc:VGNC:93938]
ENSSSCG00000006140	Upregulated	62620	4	-	51193755	51210211	TCONS_00151730	6	2529	XLOC_041243	CA2	carbonic anhydrase 2 [Source:VGNC Symbol;Acc:VGNC:98746]
ENSSSCG00000006140	Upregulated	62621	4	-	51193755	51210511	TCONS_00151731	7	2388	XLOC_041243	CA2	carbonic anhydrase 2 [Source:VGNC Symbol;Acc:VGNC:98746]
ENSSSCG00000006140	Upregulated	62622	4	-	51193755	51210511	TCONS_00151732	7	2340	XLOC_041243	CA2	carbonic anhydrase 2 [Source:VGNC Symbol;Acc:VGNC:98746]
ENSSSCG00000006140	Upregulated	62623	4	-	51193755	51211259	TCONS_00151733	7	2469	XLOC_041243	CA2	carbonic anhydrase 2 [Source:VGNC Symbol;Acc:VGNC:98746]
ENSSSCG00000006140	Upregulated	62624	4	+	51194737	51199602	TCONS_00145089	3	931	XLOC_039440	CA2	carbonic anhydrase 2 [Source:VGNC Symbol;Acc:VGNC:98746]
ENSSSCG00000006140	Upregulated	62625	4	+	51194893	51197024	TCONS_00145090	2	611	XLOC_039440	CA2	carbonic anhydrase 2 [Source:VGNC Symbol;Acc:VGNC:98746]
ENSSSCG00000046804	Upregulated	158142	12	+	21304405	21304932	TCONS_00036785	1	528	XLOC_010564	ENSSSCG00000046804
ENSSSCG00000046804	Upregulated	158143	12	-	21304864	21305406	TCONS_00042803	1	543	XLOC_012019	ENSSSCG00000046804
ENSSSCG00000046804	Upregulated	158144	12	+	21305124	21305439	TCONS_00036786	1	316	XLOC_010565	ENSSSCG00000046804
ENSSSCG00000027935	Upregulated	101368	6	+	119862353	120091410	TCONS_00177075	10	2824	XLOC_047908	FHOD3	formin homology 2 domain containing 3 [Source:VGNC Symbol;Acc:VGNC:88132]
ENSSSCG00000027935	Upregulated	101392	6	+	120036838	120577468	TCONS_00177091	27	10110	XLOC_047910	FHOD3	formin homology 2 domain containing 3 [Source:VGNC Symbol;Acc:VGNC:88132]
ENSSSCG00000027935	Upregulated	101393	6	+	120036838	120577468	TCONS_00177092	30	10308	XLOC_047910	FHOD3	formin homology 2 domain containing 3 [Source:VGNC Symbol;Acc:VGNC:88132]
ENSSSCG00000027935	Upregulated	101394	6	+	120036838	120577468	TCONS_00177093	29	10284	XLOC_047910	FHOD3	formin homology 2 domain containing 3 [Source:VGNC Symbol;Acc:VGNC:88132]
ENSSSCG00000027935	Upregulated	101395	6	+	120036838	120577468	TCONS_00177094	29	10194	XLOC_047910	FHOD3	formin homology 2 domain containing 3 [Source:VGNC Symbol;Acc:VGNC:88132]
ENSSSCG00000027935	Upregulated	101396	6	+	120036838	120577468	TCONS_00177095	29	10209	XLOC_047910	FHOD3	formin homology 2 domain containing 3 [Source:VGNC Symbol;Acc:VGNC:88132]
ENSSSCG00000027935	Upregulated	101397	6	+	120036838	120577468	TCONS_00177096	29	10339	XLOC_047910	FHOD3	formin homology 2 domain containing 3 [Source:VGNC Symbol;Acc:VGNC:88132]
ENSSSCG00000027935	Upregulated	101398	6	+	120036838	120577468	TCONS_00177097	28	10315	XLOC_047910	FHOD3	formin homology 2 domain containing 3 [Source:VGNC Symbol;Acc:VGNC:88132]
ENSSSCG00000027935	Upregulated	101399	6	+	120036838	120577468	TCONS_00177098	28	10240	XLOC_047910	FHOD3	formin homology 2 domain containing 3 [Source:VGNC Symbol;Acc:VGNC:88132]
ENSSSCG00000027935	Upregulated	101400	6	+	120036838	120577468	TCONS_00177099	26	10141	XLOC_047910	FHOD3	formin homology 2 domain containing 3 [Source:VGNC Symbol;Acc:VGNC:88132]
ENSSSCG00000027935	Upregulated	101401	6	+	120036838	120577468	TCONS_00177100	28	10225	XLOC_047910	FHOD3	formin homology 2 domain containing 3 [Source:VGNC Symbol;Acc:VGNC:88132]
ENSSSCG00000027935	Upregulated	101402	6	+	120036838	120586849	TCONS_00177101	26	6235	XLOC_047910	FHOD3	formin homology 2 domain containing 3 [Source:VGNC Symbol;Acc:VGNC:88132]
ENSSSCG00000027935	Upregulated	101403	6	+	120036838	120586849	TCONS_00177102	28	6664	XLOC_047910	FHOD3	formin homology 2 domain containing 3 [Source:VGNC Symbol;Acc:VGNC:88132]
ENSSSCG00000027935	Upregulated	101404	6	+	120036838	120586849	TCONS_00177103	25	6121	XLOC_047910	FHOD3	formin homology 2 domain containing 3 [Source:VGNC Symbol;Acc:VGNC:88132]
ENSSSCG00000027935	Upregulated	101405	6	+	120036838	120586849	TCONS_00177104	27	6589	XLOC_047910	FHOD3	formin homology 2 domain containing 3 [Source:VGNC Symbol;Acc:VGNC:88132]
ENSSSCG00000027935	Upregulated	101406	6	+	120036838	120591914	TCONS_00177105	26	7098	XLOC_047910	FHOD3	formin homology 2 domain containing 3 [Source:VGNC Symbol;Acc:VGNC:88132]
ENSSSCG00000027935	Upregulated	101407	6	+	120036838	120620619	TCONS_00177106	27	4552	XLOC_047910	FHOD3	formin homology 2 domain containing 3 [Source:VGNC Symbol;Acc:VGNC:88132]
ENSSSCG00000027935	Upregulated	101408	6	+	120036844	120586849	TCONS_00177107	27	6689	XLOC_047910	FHOD3	formin homology 2 domain containing 3 [Source:VGNC Symbol;Acc:VGNC:88132]
ENSSSCG00000027935	Upregulated	101409	6	+	120036862	120577468	TCONS_00177108	25	9618	XLOC_047910	FHOD3	formin homology 2 domain containing 3 [Source:VGNC Symbol;Acc:VGNC:88132]
ENSSSCG00000027935	Upregulated	101410	6	+	120036862	120577468	TCONS_00177109	26	9732	XLOC_047910	FHOD3	formin homology 2 domain containing 3 [Source:VGNC Symbol;Acc:VGNC:88132]
ENSSSCG00000027935	Upregulated	101411	6	+	120304732	120591914	TCONS_00177110	23	5572	XLOC_047910	FHOD3	formin homology 2 domain containing 3 [Source:VGNC Symbol;Acc:VGNC:88132]
ENSSSCG00000027935	Upregulated	101412	6	-	120317690	120576029	TCONS_00187957	21	4045	XLOC_050685	FHOD3	formin homology 2 domain containing 3 [Source:VGNC Symbol;Acc:VGNC:88132]
ENSSSCG00000027935	Upregulated	101413	6	-	120317690	120585891	TCONS_00187958	20	4862	XLOC_050685	FHOD3	formin homology 2 domain containing 3 [Source:VGNC Symbol;Acc:VGNC:88132]
ENSSSCG00000027935	Upregulated	101414	6	-	120317690	120585893	TCONS_00187959	21	4959	XLOC_050685	FHOD3	formin homology 2 domain containing 3 [Source:VGNC Symbol;Acc:VGNC:88132]
ENSSSCG00000027935	Upregulated	101415	6	-	120317690	120586188	TCONS_00187960	23	5236	XLOC_050685	FHOD3	formin homology 2 domain containing 3 [Source:VGNC Symbol;Acc:VGNC:88132]
ENSSSCG00000027935	Upregulated	101416	6	+	120317819	120570059	TCONS_00177111	20	4040	XLOC_047910	FHOD3	formin homology 2 domain containing 3 [Source:VGNC Symbol;Acc:VGNC:88132]
ENSSSCG00000027935	Upregulated	101417	6	-	120398738	120585553	TCONS_00187961	15	3642	XLOC_050685	FHOD3	formin homology 2 domain containing 3 [Source:VGNC Symbol;Acc:VGNC:88132]
ENSSSCG00000027935	Upregulated	101421	6	-	120511561	120585877	TCONS_00187962	9	2398	XLOC_050685	FHOD3	formin homology 2 domain containing 3 [Source:VGNC Symbol;Acc:VGNC:88132]
ENSSSCG00000006624	Upregulated	67794	4	+	97849067	97893858	TCONS_00147696	15	2215	XLOC_040117	SELENBP1	selenium binding protein 1 [Source:VGNC Symbol;Acc:VGNC:92689]
ENSSSCG00000006624	Upregulated	67795	4	+	97849209	97894000	TCONS_00147697	14	2137	XLOC_040117	SELENBP1	selenium binding protein 1 [Source:VGNC Symbol;Acc:VGNC:92689]
ENSSSCG00000006624	Upregulated	67796	4	+	97882678	97893998	TCONS_00147698	12	1800	XLOC_040117	SELENBP1	selenium binding protein 1 [Source:VGNC Symbol;Acc:VGNC:92689]
ENSSSCG00000006624	Upregulated	67799	4	+	97882885	97894303	TCONS_00147701	12	2088	XLOC_040117	SELENBP1	selenium binding protein 1 [Source:VGNC Symbol;Acc:VGNC:92689]
ENSSSCG00000006624	Upregulated	67800	4	-	97885443	97893276	TCONS_00154283	11	1280	XLOC_041902	SELENBP1	selenium binding protein 1 [Source:VGNC Symbol;Acc:VGNC:92689]
ENSSSCG00000006624	Upregulated	67801	4	-	97885443	97897361	TCONS_00154284	12	5132	XLOC_041902	SELENBP1	selenium binding protein 1 [Source:VGNC Symbol;Acc:VGNC:92689]
ENSSSCG00000006624	Upregulated	67805	4	+	97885475	97893998	TCONS_00147702	13	1880	XLOC_040117	SELENBP1	selenium binding protein 1 [Source:VGNC Symbol;Acc:VGNC:92689]
ENSSSCG00000006624	Upregulated	67808	4	+	97885475	97894303	TCONS_00147705	11	2141	XLOC_040117	SELENBP1	selenium binding protein 1 [Source:VGNC Symbol;Acc:VGNC:92689]
ENSSSCG00000006624	Upregulated	67809	4	+	97885475	97894303	TCONS_00147706	11	1856	XLOC_040117	SELENBP1	selenium binding protein 1 [Source:VGNC Symbol;Acc:VGNC:92689]
ENSSSCG00000006624	Upregulated	67811	4	+	97886211	97894303	TCONS_00147708	10	4102	XLOC_040117	SELENBP1	selenium binding protein 1 [Source:VGNC Symbol;Acc:VGNC:92689]
ENSSSCG00000006624	Upregulated	67812	4	+	97887979	97894303	TCONS_00147709	11	2070	XLOC_040117	SELENBP1	selenium binding protein 1 [Source:VGNC Symbol;Acc:VGNC:92689]
ENSSSCG00000006624	Upregulated	67813	4	+	97887979	97894303	TCONS_00147710	12	2055	XLOC_040117	SELENBP1	selenium binding protein 1 [Source:VGNC Symbol;Acc:VGNC:92689]
ENSSSCG00000024021	Upregulated	147020	10	-	57919051	57929082	TCONS_00028471	2	5327	XLOC_008090	ENSSSCG00000024021
ENSSSCG00000024021	Upregulated	147021	10	+	57919306	57929054	TCONS_00025027	2	5044	XLOC_007041	ENSSSCG00000024021
ENSSSCG00000034542	Upregulated	50922	3	+	55014978	55054412	TCONS_00130928	15	6976	XLOC_035620	LYG2	lysozyme g2 [Source:HGNC Symbol;Acc:HGNC:29615]
ENSSSCG00000034542	Upregulated	50923	3	+	55017572	55032344	TCONS_00130929	6	4696	XLOC_035620	LYG2	lysozyme g2 [Source:HGNC Symbol;Acc:HGNC:29615]
ENSSSCG00000034542	Upregulated	50924	3	-	55018026	55032765	TCONS_00139180	8	3304	XLOC_037765	LYG2	lysozyme g2 [Source:HGNC Symbol;Acc:HGNC:29615]
ENSSSCG00000034542	Upregulated	50925	3	-	55018026	55032765	TCONS_00139181	8	4168	XLOC_037765	LYG2	lysozyme g2 [Source:HGNC Symbol;Acc:HGNC:29615]
ENSSSCG00000034542	Upregulated	50939	3	+	55021559	55032986	TCONS_00130930	7	3073	XLOC_035620	LYG2	lysozyme g2 [Source:HGNC Symbol;Acc:HGNC:29615]
ENSSSCG00000034542	Upregulated	50940	3	-	55021561	55032762	TCONS_00139195	7	2827	XLOC_037765	LYG2	lysozyme g2 [Source:HGNC Symbol;Acc:HGNC:29615]
ENSSSCG00000034542	Upregulated	50942	3	+	55027841	55032986	TCONS_00130931	3	3005	XLOC_035620	LYG2	lysozyme g2 [Source:HGNC Symbol;Acc:HGNC:29615]
ENSSSCG00000034542	Upregulated	50943	3	+	55028898	55032986	TCONS_00130932	3	3909	XLOC_035620	LYG2	lysozyme g2 [Source:HGNC Symbol;Acc:HGNC:29615]
ENSSSCG00000037569	Upregulated	158091	12	-	21124677	21318257	TCONS_00042781	9	1616	XLOC_011999	ENSSSCG00000037569
ENSSSCG00000037569	Upregulated	158097	12	-	21127915	21389032	TCONS_00042783	3	144	XLOC_012000	ENSSSCG00000037569
ENSSSCG00000037569	Upregulated	158125	12	-	21222537	21477499	TCONS_00042795	2	737	XLOC_012011	ENSSSCG00000037569
ENSSSCG00000037569	Upregulated	158148	12	-	21316816	21317616	TCONS_00042804	2	657	XLOC_012020	ENSSSCG00000037569
ENSSSCG00000017451	Upregulated	158170	12	+	21422164	21422646	TCONS_00036799	1	483	XLOC_010576	ENSSSCG00000017451
ENSSSCG00000017451	Upregulated	158171	12	-	21422552	21422928	TCONS_00042817	1	377	XLOC_012033	ENSSSCG00000017451
ENSSSCG00000027632	Upregulated	158172	12	+	21427720	21428259	TCONS_00036800	1	540	XLOC_010577	ENSSSCG00000027632
ENSSSCG00000027632	Upregulated	158173	12	-	21428156	21428676	TCONS_00042818	1	521	XLOC_012034	ENSSSCG00000027632
ENSSSCG00000003789	Upregulated	102266	6	+	142435601	142486453	TCONS_00177534	13	2093	XLOC_048014	CTH	cystathionine gamma-lyase [Source:VGNC Symbol;Acc:VGNC:96961]
ENSSSCG00000003789	Upregulated	102267	6	-	142435626	142478861	TCONS_00188386	7	1105	XLOC_050784	CTH	cystathionine gamma-lyase [Source:VGNC Symbol;Acc:VGNC:96961]
ENSSSCG00000003789	Upregulated	102268	6	-	142435690	142486367	TCONS_00188387	13	1918	XLOC_050784	CTH	cystathionine gamma-lyase [Source:VGNC Symbol;Acc:VGNC:96961]
ENSSSCG00000003789	Upregulated	102269	6	-	142435690	142486367	TCONS_00188388	12	1786	XLOC_050784	CTH	cystathionine gamma-lyase [Source:VGNC Symbol;Acc:VGNC:96961]
ENSSSCG00000003789	Upregulated	102270	6	-	142435690	142486367	TCONS_00188389	12	1822	XLOC_050784	CTH	cystathionine gamma-lyase [Source:VGNC Symbol;Acc:VGNC:96961]
ENSSSCG00000003789	Upregulated	102271	6	+	142454970	142486453	TCONS_00177535	11	1810	XLOC_048014	CTH	cystathionine gamma-lyase [Source:VGNC Symbol;Acc:VGNC:96961]
ENSSSCG00000003789	Upregulated	102272	6	+	142455153	142486453	TCONS_00177536	8	1371	XLOC_048014	CTH	cystathionine gamma-lyase [Source:VGNC Symbol;Acc:VGNC:96961]
ENSSSCG00000003789	Upregulated	102273	6	+	142455226	142478887	TCONS_00177537	10	1117	XLOC_048014	CTH	cystathionine gamma-lyase [Source:VGNC Symbol;Acc:VGNC:96961]
ENSSSCG00000011831	Upregulated	177431	13	+	132274280	132557763	TCONS_00052377	7	1833	XLOC_014470	APOD	apolipoprotein D [Source:VGNC Symbol;Acc:VGNC:85422]
ENSSSCG00000011831	Upregulated	177460	13	+	132514059	132557763	TCONS_00052389	7	788	XLOC_014470	APOD	apolipoprotein D [Source:VGNC Symbol;Acc:VGNC:85422]
ENSSSCG00000011831	Upregulated	177462	13	-	132514949	132530808	TCONS_00061199	4	1684	XLOC_016744	APOD	apolipoprotein D [Source:VGNC Symbol;Acc:VGNC:85422]
ENSSSCG00000011831	Upregulated	177463	13	-	132514949	132562599	TCONS_00061200	7	2005	XLOC_016744	APOD	apolipoprotein D [Source:VGNC Symbol;Acc:VGNC:85422]
ENSSSCG00000011831	Upregulated	177464	13	-	132515701	132562599	TCONS_00061201	7	1253	XLOC_016744	APOD	apolipoprotein D [Source:VGNC Symbol;Acc:VGNC:85422]
ENSSSCG00000011831	Upregulated	177465	13	-	132515907	132534530	TCONS_00061202	4	756	XLOC_016744	APOD	apolipoprotein D [Source:VGNC Symbol;Acc:VGNC:85422]
ENSSSCG00000034827	Upregulated	46051	3	+	22403032	22477156	TCONS_00128600	2	482	XLOC_035031	CHP2	calcineurin like EF-hand protein 2 [Source:VGNC Symbol;Acc:VGNC:86658]
ENSSSCG00000034827	Upregulated	46052	3	-	22473240	22477075	TCONS_00136651	4	3396	XLOC_037169	CHP2	calcineurin like EF-hand protein 2 [Source:VGNC Symbol;Acc:VGNC:86658]
ENSSSCG00000034827	Upregulated	46053	3	-	22473240	22478588	TCONS_00136652	8	3203	XLOC_037169	CHP2	calcineurin like EF-hand protein 2 [Source:VGNC Symbol;Acc:VGNC:86658]
ENSSSCG00000034827	Upregulated	46056	3	+	22473244	22478698	TCONS_00128601	7	3399	XLOC_035032	CHP2	calcineurin like EF-hand protein 2 [Source:VGNC Symbol;Acc:VGNC:86658]
ENSSSCG00000034827	Upregulated	46057	3	+	22473245	22478698	TCONS_00128602	6	3325	XLOC_035032	CHP2	calcineurin like EF-hand protein 2 [Source:VGNC Symbol;Acc:VGNC:86658]
ENSSSCG00000034827	Upregulated	46058	3	-	22473247	22478588	TCONS_00136655	7	3286	XLOC_037169	CHP2	calcineurin like EF-hand protein 2 [Source:VGNC Symbol;Acc:VGNC:86658]
ENSSSCG00000017464	Upregulated	158234	12	+	21703363	21709922	TCONS_00036837	8	1758	XLOC_010597	KRT25	keratin 25 [Source:VGNC Symbol;Acc:VGNC:89584]
ENSSSCG00000017464	Upregulated	158235	12	+	21703363	21709922	TCONS_00036838	8	1758	XLOC_010597	KRT25	keratin 25 [Source:VGNC Symbol;Acc:VGNC:89584]
ENSSSCG00000017464	Upregulated	158236	12	-	21703829	21708113	TCONS_00042843	6	663	XLOC_012055	KRT25	keratin 25 [Source:VGNC Symbol;Acc:VGNC:89584]
ENSSSCG00000017464	Upregulated	158237	12	-	21708190	21709923	TCONS_00042844	4	526	XLOC_012056	KRT25	keratin 25 [Source:VGNC Symbol;Acc:VGNC:89584]
ENSSSCG00000038121	Upregulated	67556	4	-	97059672	97207273	TCONS_00154162	2	1428	XLOC_041871	ENSSSCG00000038121
ENSSSCG00000038121	Upregulated	67569	4	+	97159739	97168508	TCONS_00147584	7	2035	XLOC_040085	ENSSSCG00000038121
ENSSSCG00000038121	Upregulated	67570	4	+	97159739	97236581	TCONS_00147585	4	705	XLOC_040085	ENSSSCG00000038121
ENSSSCG00000038121	Upregulated	67571	4	+	97161407	97257966	TCONS_00147586	4	3174	XLOC_040085	ENSSSCG00000038121
ENSSSCG00000038121	Upregulated	67572	4	+	97164992	97168508	TCONS_00147587	5	2389	XLOC_040085	ENSSSCG00000038121
ENSSSCG00000038121	Upregulated	67573	4	+	97165007	97168508	TCONS_00147588	4	2196	XLOC_040085	ENSSSCG00000038121
ENSSSCG00000038121	Upregulated	67574	4	+	97165067	97167199	TCONS_00147589	5	1005	XLOC_040085	ENSSSCG00000038121
ENSSSCG00000038121	Upregulated	67575	4	+	97165067	97168508	TCONS_00147590	5	2092	XLOC_040085	ENSSSCG00000038121
ENSSSCG00000038121	Upregulated	67576	4	-	97166773	97168244	TCONS_00154170	1	1472	XLOC_041873	ENSSSCG00000038121
ENSSSCG00000040681	Upregulated	62805	4	-	55096356	55105578	TCONS_00151815	5	4667	XLOC_041266	FABP4	fatty acid binding protein 4, adipocyte [Source:NCBI gene (formerly Entrezgene);Acc:399533]
ENSSSCG00000040681	Upregulated	62809	4	+	55096404	55101897	TCONS_00145187	4	1555	XLOC_039471	FABP4	fatty acid binding protein 4, adipocyte [Source:NCBI gene (formerly Entrezgene);Acc:399533]
ENSSSCG00000040681	Upregulated	62810	4	+	55096404	55376989	TCONS_00145188	3	317	XLOC_039471	FABP4	fatty acid binding protein 4, adipocyte [Source:NCBI gene (formerly Entrezgene);Acc:399533]
ENSSSCG00000041508	Upregulated	107647	7	-	19531321	19585841	TCONS_00198031	3	1221	XLOC_053566	ENSSSCG00000041508
ENSSSCG00000041508	Upregulated	107648	7	-	19549598	19557370	TCONS_00198032	2	7517	XLOC_053567	ENSSSCG00000041508
ENSSSCG00000041508	Upregulated	107649	7	-	19549598	19557370	TCONS_00198033	3	5705	XLOC_053567	ENSSSCG00000041508
ENSSSCG00000041508	Upregulated	107650	7	-	19549598	19557388	TCONS_00198034	1	7791	XLOC_053567	ENSSSCG00000041508
ENSSSCG00000041508	Upregulated	107651	7	+	19549606	19557622	TCONS_00191163	2	2474	XLOC_051661	ENSSSCG00000041508
ENSSSCG00000041508	Upregulated	107652	7	+	19549623	19557622	TCONS_00191164	3	7288	XLOC_051661	ENSSSCG00000041508
ENSSSCG00000041508	Upregulated	107653	7	+	19549623	19557622	TCONS_00191165	3	7710	XLOC_051661	ENSSSCG00000041508
ENSSSCG00000041508	Upregulated	107654	7	+	19549623	19557622	TCONS_00191166	4	6013	XLOC_051661	ENSSSCG00000041508
ENSSSCG00000041508	Upregulated	107655	7	+	19549623	19557622	TCONS_00191167	3	5471	XLOC_051661	ENSSSCG00000041508
ENSSSCG00000041508	Upregulated	107656	7	+	19549680	19570345	TCONS_00191168	3	4472	XLOC_051661	ENSSSCG00000041508
ENSSSCG00000041508	Upregulated	107657	7	+	19551996	19553882	TCONS_00191169	2	1631	XLOC_051661	ENSSSCG00000041508
ENSSSCG00000033085	Upregulated	158157	12	+	21358375	21368550	TCONS_00036794	2	1014	XLOC_010571	ENSSSCG00000033085
ENSSSCG00000033085	Upregulated	158158	12	-	21358653	21359244	TCONS_00042809	1	592	XLOC_012025	ENSSSCG00000033085
ENSSSCG00000033085	Upregulated	158159	12	-	21368490	21368823	TCONS_00042810	1	334	XLOC_012026	ENSSSCG00000033085
ENSSSCG00000017462	Upregulated	158218	12	+	21664379	21682465	TCONS_00036831	9	1631	XLOC_010592	KRT27	keratin 27 [Source:VGNC Symbol;Acc:VGNC:98065]
ENSSSCG00000017462	Upregulated	158227	12	+	21677106	21682465	TCONS_00036835	8	1611	XLOC_010592	KRT27	keratin 27 [Source:VGNC Symbol;Acc:VGNC:98065]
ENSSSCG00000017462	Upregulated	158228	12	-	21677120	21681343	TCONS_00042838	6	1075	XLOC_012053	KRT27	keratin 27 [Source:VGNC Symbol;Acc:VGNC:98065]
ENSSSCG00000017462	Upregulated	158229	12	-	21681414	21682455	TCONS_00042839	3	442	XLOC_012054	KRT27	keratin 27 [Source:VGNC Symbol;Acc:VGNC:98065]
ENSSSCG00000044281	Upregulated	147956	10	+	68546966	68578428	TCONS_00025518	21	5296	XLOC_007214	ENSSSCG00000044281
ENSSSCG00000044281	Upregulated	147957	10	+	68547047	68621160	TCONS_00025519	23	7633	XLOC_007214	ENSSSCG00000044281
ENSSSCG00000044281	Upregulated	147966	10	+	68547351	68583886	TCONS_00025520	22	6529	XLOC_007214	ENSSSCG00000044281
ENSSSCG00000044281	Upregulated	147968	10	+	68568161	68583886	TCONS_00025522	8	4276	XLOC_007214	ENSSSCG00000044281
ENSSSCG00000044281	Upregulated	147973	10	+	68573064	68621160	TCONS_00025525	3	1423	XLOC_007214	ENSSSCG00000044281
ENSSSCG00000044281	Upregulated	147974	10	+	68573255	68577156	TCONS_00025526	2	1988	XLOC_007214	ENSSSCG00000044281
ENSSSCG00000021804	Upregulated	180908	13	+	193568683	193731583	TCONS_00054129	2	838	XLOC_014975	KRTAP24-1	keratin associated protein 24-1 [Source:VGNC Symbol;Acc:VGNC:89601]
ENSSSCG00000021804	Upregulated	180933	13	+	193629001	193646385	TCONS_00054142	3	2671	XLOC_014975	KRTAP24-1	keratin associated protein 24-1 [Source:VGNC Symbol;Acc:VGNC:89601]
ENSSSCG00000021804	Upregulated	180934	13	-	193629221	193646415	TCONS_00062914	3	2511	XLOC_017283	KRTAP24-1	keratin associated protein 24-1 [Source:VGNC Symbol;Acc:VGNC:89601]
ENSSSCG00000021804	Upregulated	180935	13	-	193630813	193631574	TCONS_00062915	1	762	XLOC_017283	KRTAP24-1	keratin associated protein 24-1 [Source:VGNC Symbol;Acc:VGNC:89601]
ENSSSCG00000017439	Upregulated	158112	12	+	21176089	21182646	TCONS_00036768	8	1164	XLOC_010556	KRT32	keratin 32 [Source:VGNC Symbol;Acc:VGNC:89587]
ENSSSCG00000017439	Upregulated	158113	12	+	21176089	21184904	TCONS_00036769	9	1301	XLOC_010556	KRT32	keratin 32 [Source:VGNC Symbol;Acc:VGNC:89587]
ENSSSCG00000017439	Upregulated	158114	12	-	21178967	21182473	TCONS_00042790	4	476	XLOC_012007	KRT32	keratin 32 [Source:VGNC Symbol;Acc:VGNC:89587]
ENSSSCG00000017439	Upregulated	158115	12	+	21179503	21192173	TCONS_00036770	5	617	XLOC_010556	KRT32	keratin 32 [Source:VGNC Symbol;Acc:VGNC:89587]
ENSSSCG00000017439	Upregulated	158116	12	+	21179538	21184904	TCONS_00036771	5	667	XLOC_010556	KRT32	keratin 32 [Source:VGNC Symbol;Acc:VGNC:89587]
ENSSSCG00000017439	Upregulated	158117	12	-	21180159	21180736	TCONS_00042791	3	399	XLOC_012007	KRT32	keratin 32 [Source:VGNC Symbol;Acc:VGNC:89587]
ENSSSCG00000005701	Upregulated	21524	1	-	270531506	270586327	TCONS_00021767	15	1563	XLOC_005983	ASS1	argininosuccinate synthase 1 [Source:VGNC Symbol;Acc:VGNC:85590]
ENSSSCG00000005701	Upregulated	21525	1	-	270531506	270586348	TCONS_00021768	15	1586	XLOC_005983	ASS1	argininosuccinate synthase 1 [Source:VGNC Symbol;Acc:VGNC:85590]
ENSSSCG00000005701	Upregulated	21526	1	-	270531506	270586385	TCONS_00021769	15	1625	XLOC_005983	ASS1	argininosuccinate synthase 1 [Source:VGNC Symbol;Acc:VGNC:85590]
ENSSSCG00000005701	Upregulated	21527	1	+	270531589	270586353	TCONS_00010642	15	5199	XLOC_002950	ASS1	argininosuccinate synthase 1 [Source:VGNC Symbol;Acc:VGNC:85590]
ENSSSCG00000005701	Upregulated	21528	1	+	270531589	270586355	TCONS_00010643	16	1461	XLOC_002950	ASS1	argininosuccinate synthase 1 [Source:VGNC Symbol;Acc:VGNC:85590]
ENSSSCG00000005701	Upregulated	21529	1	+	270531589	270586361	TCONS_00010644	16	1592	XLOC_002950	ASS1	argininosuccinate synthase 1 [Source:VGNC Symbol;Acc:VGNC:85590]
ENSSSCG00000005701	Upregulated	21530	1	+	270531589	270586486	TCONS_00010645	16	5281	XLOC_002950	ASS1	argininosuccinate synthase 1 [Source:VGNC Symbol;Acc:VGNC:85590]
ENSSSCG00000005701	Upregulated	21531	1	+	270531589	270586486	TCONS_00010646	14	1490	XLOC_002950	ASS1	argininosuccinate synthase 1 [Source:VGNC Symbol;Acc:VGNC:85590]
ENSSSCG00000005701	Upregulated	21532	1	+	270531589	270586486	TCONS_00010647	15	1643	XLOC_002950	ASS1	argininosuccinate synthase 1 [Source:VGNC Symbol;Acc:VGNC:85590]
ENSSSCG00000005701	Upregulated	21533	1	+	270531621	270586486	TCONS_00010648	15	1607	XLOC_002950	ASS1	argininosuccinate synthase 1 [Source:VGNC Symbol;Acc:VGNC:85590]
ENSSSCG00000005701	Upregulated	21534	1	+	270532332	270586360	TCONS_00010649	15	1789	XLOC_002950	ASS1	argininosuccinate synthase 1 [Source:VGNC Symbol;Acc:VGNC:85590]
ENSSSCG00000005701	Upregulated	21535	1	+	270532332	270586360	TCONS_00010650	13	1687	XLOC_002950	ASS1	argininosuccinate synthase 1 [Source:VGNC Symbol;Acc:VGNC:85590]
ENSSSCG00000005701	Upregulated	21536	1	+	270532332	270586486	TCONS_00010651	14	1762	XLOC_002950	ASS1	argininosuccinate synthase 1 [Source:VGNC Symbol;Acc:VGNC:85590]
ENSSSCG00000028996	Upregulated	17106	1	-	226161296	226217306	TCONS_00019571	13	4136	XLOC_005448	ALDH1A1	aldehyde dehydrogenase 1 family member A1 [Source:VGNC Symbol;Acc:VGNC:97877]
ENSSSCG00000028996	Upregulated	17107	1	-	226161296	226217312	TCONS_00019572	12	7503	XLOC_005448	ALDH1A1	aldehyde dehydrogenase 1 family member A1 [Source:VGNC Symbol;Acc:VGNC:97877]
ENSSSCG00000028996	Upregulated	17108	1	-	226161296	226217312	TCONS_00019573	12	4028	XLOC_005448	ALDH1A1	aldehyde dehydrogenase 1 family member A1 [Source:VGNC Symbol;Acc:VGNC:97877]
ENSSSCG00000028996	Upregulated	17109	1	-	226161296	226217312	TCONS_00019574	12	4013	XLOC_005448	ALDH1A1	aldehyde dehydrogenase 1 family member A1 [Source:VGNC Symbol;Acc:VGNC:97877]
ENSSSCG00000028996	Upregulated	17110	1	-	226161296	226217312	TCONS_00019575	12	4001	XLOC_005448	ALDH1A1	aldehyde dehydrogenase 1 family member A1 [Source:VGNC Symbol;Acc:VGNC:97877]
ENSSSCG00000028996	Upregulated	17111	1	-	226161296	226217312	TCONS_00019576	12	3922	XLOC_005448	ALDH1A1	aldehyde dehydrogenase 1 family member A1 [Source:VGNC Symbol;Acc:VGNC:97877]
ENSSSCG00000028996	Upregulated	17112	1	+	226163085	226226986	TCONS_00008430	14	2348	XLOC_002411	ALDH1A1	aldehyde dehydrogenase 1 family member A1 [Source:VGNC Symbol;Acc:VGNC:97877]
ENSSSCG00000028996	Upregulated	17113	1	-	226163349	226217308	TCONS_00019577	12	5446	XLOC_005448	ALDH1A1	aldehyde dehydrogenase 1 family member A1 [Source:VGNC Symbol;Acc:VGNC:97877]
ENSSSCG00000028996	Upregulated	17114	1	-	226163351	226217303	TCONS_00019578	12	1949	XLOC_005448	ALDH1A1	aldehyde dehydrogenase 1 family member A1 [Source:VGNC Symbol;Acc:VGNC:97877]
ENSSSCG00000028996	Upregulated	17115	1	-	226163352	226217292	TCONS_00019579	12	1925	XLOC_005448	ALDH1A1	aldehyde dehydrogenase 1 family member A1 [Source:VGNC Symbol;Acc:VGNC:97877]
ENSSSCG00000028996	Upregulated	17116	1	-	226163353	226217306	TCONS_00019580	12	1965	XLOC_005448	ALDH1A1	aldehyde dehydrogenase 1 family member A1 [Source:VGNC Symbol;Acc:VGNC:97877]
ENSSSCG00000028996	Upregulated	17117	1	-	226180507	226217312	TCONS_00019581	8	752	XLOC_005448	ALDH1A1	aldehyde dehydrogenase 1 family member A1 [Source:VGNC Symbol;Acc:VGNC:97877]
ENSSSCG00000032723	Upregulated	130737	9	+	10951561	11160528	TCONS_00214444	17	4578	XLOC_058219	ACER3	alkaline ceramidase 3 [Source:HGNC Symbol;Acc:HGNC:16066]
ENSSSCG00000032723	Upregulated	130738	9	+	10951561	11167412	TCONS_00214445	18	11416	XLOC_058219	ACER3	alkaline ceramidase 3 [Source:HGNC Symbol;Acc:HGNC:16066]
ENSSSCG00000032723	Upregulated	130739	9	+	10951561	11167412	TCONS_00214446	16	11360	XLOC_058219	ACER3	alkaline ceramidase 3 [Source:HGNC Symbol;Acc:HGNC:16066]
ENSSSCG00000032723	Upregulated	130740	9	+	10951561	11167412	TCONS_00214447	16	11409	XLOC_058219	ACER3	alkaline ceramidase 3 [Source:HGNC Symbol;Acc:HGNC:16066]
ENSSSCG00000032723	Upregulated	130741	9	+	10951561	11167412	TCONS_00214448	16	11426	XLOC_058219	ACER3	alkaline ceramidase 3 [Source:HGNC Symbol;Acc:HGNC:16066]
ENSSSCG00000032723	Upregulated	130742	9	+	10951561	11167412	TCONS_00214449	18	8514	XLOC_058219	ACER3	alkaline ceramidase 3 [Source:HGNC Symbol;Acc:HGNC:16066]
ENSSSCG00000032723	Upregulated	130746	9	+	11004423	11165493	TCONS_00214453	12	6523	XLOC_058219	ACER3	alkaline ceramidase 3 [Source:HGNC Symbol;Acc:HGNC:16066]
ENSSSCG00000032723	Upregulated	130747	9	+	11004423	11167412	TCONS_00214454	10	11354	XLOC_058219	ACER3	alkaline ceramidase 3 [Source:HGNC Symbol;Acc:HGNC:16066]
ENSSSCG00000032723	Upregulated	130748	9	+	11004423	11167412	TCONS_00214455	10	11279	XLOC_058219	ACER3	alkaline ceramidase 3 [Source:HGNC Symbol;Acc:HGNC:16066]
ENSSSCG00000032723	Upregulated	130749	9	+	11004423	11167412	TCONS_00214456	12	11301	XLOC_058219	ACER3	alkaline ceramidase 3 [Source:HGNC Symbol;Acc:HGNC:16066]
ENSSSCG00000032723	Upregulated	130750	9	+	11004423	11167412	TCONS_00214457	7	10990	XLOC_058219	ACER3	alkaline ceramidase 3 [Source:HGNC Symbol;Acc:HGNC:16066]
ENSSSCG00000032723	Upregulated	130751	9	+	11004752	11160529	TCONS_00214458	10	4067	XLOC_058219	ACER3	alkaline ceramidase 3 [Source:HGNC Symbol;Acc:HGNC:16066]
ENSSSCG00000032723	Upregulated	130752	9	+	11004788	11161608	TCONS_00214459	10	5185	XLOC_058219	ACER3	alkaline ceramidase 3 [Source:HGNC Symbol;Acc:HGNC:16066]
ENSSSCG00000032723	Upregulated	130753	9	+	11004802	11162502	TCONS_00214460	11	6762	XLOC_058219	ACER3	alkaline ceramidase 3 [Source:HGNC Symbol;Acc:HGNC:16066]
ENSSSCG00000032723	Upregulated	130754	9	-	11004828	11157845	TCONS_00220547	10	1365	XLOC_059932	ACER3	alkaline ceramidase 3 [Source:HGNC Symbol;Acc:HGNC:16066]
ENSSSCG00000032723	Upregulated	130755	9	-	11004828	11165052	TCONS_00220548	12	3521	XLOC_059932	ACER3	alkaline ceramidase 3 [Source:HGNC Symbol;Acc:HGNC:16066]
ENSSSCG00000032723	Upregulated	130756	9	-	11004828	11167259	TCONS_00220549	12	10361	XLOC_059932	ACER3	alkaline ceramidase 3 [Source:HGNC Symbol;Acc:HGNC:16066]
ENSSSCG00000032723	Upregulated	130757	9	-	11004828	11167629	TCONS_00220550	9	11009	XLOC_059932	ACER3	alkaline ceramidase 3 [Source:HGNC Symbol;Acc:HGNC:16066]
ENSSSCG00000032723	Upregulated	130758	9	-	11004828	11167629	TCONS_00220551	11	11202	XLOC_059932	ACER3	alkaline ceramidase 3 [Source:HGNC Symbol;Acc:HGNC:16066]
ENSSSCG00000032723	Upregulated	130760	9	+	11016473	11172566	TCONS_00214461	2	3228	XLOC_058221	ACER3	alkaline ceramidase 3 [Source:HGNC Symbol;Acc:HGNC:16066]
ENSSSCG00000032723	Upregulated	130761	9	+	11016541	11167412	TCONS_00214462	10	10880	XLOC_058219	ACER3	alkaline ceramidase 3 [Source:HGNC Symbol;Acc:HGNC:16066]
ENSSSCG00000032723	Upregulated	130762	9	+	11096482	11167412	TCONS_00214463	9	10770	XLOC_058219	ACER3	alkaline ceramidase 3 [Source:HGNC Symbol;Acc:HGNC:16066]
ENSSSCG00000036987	Upregulated	158182	12	+	21481898	21489286	TCONS_00036805	7	1284	XLOC_010582	KRT40	keratin 40 [Source:VGNC Symbol;Acc:VGNC:89592]
ENSSSCG00000006399	Upregulated	65780	4	-	90492585	90642577	TCONS_00153338	6	791	XLOC_041625	VSIG8	V-set and immunoglobulin domain containing 8 [Source:VGNC Symbol;Acc:VGNC:98894]
ENSSSCG00000006399	Upregulated	65806	4	-	90583579	90642579	TCONS_00153345	6	778	XLOC_041625	VSIG8	V-set and immunoglobulin domain containing 8 [Source:VGNC Symbol;Acc:VGNC:98894]
ENSSSCG00000006399	Upregulated	65830	4	+	90632032	90638852	TCONS_00146667	2	586	XLOC_039855	VSIG8	V-set and immunoglobulin domain containing 8 [Source:VGNC Symbol;Acc:VGNC:98894]
ENSSSCG00000006399	Upregulated	65832	4	+	90632148	90637932	TCONS_00146669	2	481	XLOC_039855	VSIG8	V-set and immunoglobulin domain containing 8 [Source:VGNC Symbol;Acc:VGNC:98894]
ENSSSCG00000006399	Upregulated	65839	4	+	90636994	90644829	TCONS_00146672	7	1839	XLOC_039860	VSIG8	V-set and immunoglobulin domain containing 8 [Source:VGNC Symbol;Acc:VGNC:98894]
ENSSSCG00000006399	Upregulated	65840	4	-	90637068	90642561	TCONS_00153359	5	1004	XLOC_041625	VSIG8	V-set and immunoglobulin domain containing 8 [Source:VGNC Symbol;Acc:VGNC:98894]
ENSSSCG00000006399	Upregulated	65841	4	+	90637068	90644052	TCONS_00146673	7	1926	XLOC_039860	VSIG8	V-set and immunoglobulin domain containing 8 [Source:VGNC Symbol;Acc:VGNC:98894]
ENSSSCG00000006399	Upregulated	65842	4	-	90637068	90644101	TCONS_00153360	8	1511	XLOC_041625	VSIG8	V-set and immunoglobulin domain containing 8 [Source:VGNC Symbol;Acc:VGNC:98894]
ENSSSCG00000006399	Upregulated	65843	4	-	90637068	90644184	TCONS_00153361	7	2207	XLOC_041625	VSIG8	V-set and immunoglobulin domain containing 8 [Source:VGNC Symbol;Acc:VGNC:98894]
ENSSSCG00000006399	Upregulated	65844	4	-	90637068	90644187	TCONS_00153362	7	1377	XLOC_041625	VSIG8	V-set and immunoglobulin domain containing 8 [Source:VGNC Symbol;Acc:VGNC:98894]
ENSSSCG00000006399	Upregulated	65845	4	+	90637190	90845146	TCONS_00146674	7	1580	XLOC_039860	VSIG8	V-set and immunoglobulin domain containing 8 [Source:VGNC Symbol;Acc:VGNC:98894]
ENSSSCG00000006399	Upregulated	65846	4	+	90637193	90644392	TCONS_00146675	8	1343	XLOC_039860	VSIG8	V-set and immunoglobulin domain containing 8 [Source:VGNC Symbol;Acc:VGNC:98894]
ENSSSCG00000006399	Upregulated	65847	4	+	90637213	90642581	TCONS_00146676	5	879	XLOC_039860	VSIG8	V-set and immunoglobulin domain containing 8 [Source:VGNC Symbol;Acc:VGNC:98894]
ENSSSCG00000006399	Upregulated	65848	4	+	90637219	90644052	TCONS_00146677	5	1730	XLOC_039860	VSIG8	V-set and immunoglobulin domain containing 8 [Source:VGNC Symbol;Acc:VGNC:98894]
ENSSSCG00000006399	Upregulated	65849	4	+	90637219	90644052	TCONS_00146678	5	1664	XLOC_039860	VSIG8	V-set and immunoglobulin domain containing 8 [Source:VGNC Symbol;Acc:VGNC:98894]
ENSSSCG00000006399	Upregulated	65850	4	+	90637219	90644387	TCONS_00146679	8	1396	XLOC_039860	VSIG8	V-set and immunoglobulin domain containing 8 [Source:VGNC Symbol;Acc:VGNC:98894]
ENSSSCG00000006399	Upregulated	65851	4	+	90640543	90644387	TCONS_00146680	8	1122	XLOC_039860	VSIG8	V-set and immunoglobulin domain containing 8 [Source:VGNC Symbol;Acc:VGNC:98894]
ENSSSCG00000006579	Upregulated	67243	4	-	96083889	96086799	TCONS_00154030	3	535	XLOC_041781	S100A3	S100 calcium binding protein A3 [Source:VGNC Symbol;Acc:VGNC:92542]
ENSSSCG00000006579	Upregulated	67244	4	-	96083936	96086870	TCONS_00154031	4	778	XLOC_041781	S100A3	S100 calcium binding protein A3 [Source:VGNC Symbol;Acc:VGNC:92542]
ENSSSCG00000006579	Upregulated	67245	4	+	96084088	96086827	TCONS_00147404	3	640	XLOC_039992	S100A3	S100 calcium binding protein A3 [Source:VGNC Symbol;Acc:VGNC:92542]
ENSSSCG00000006579	Upregulated	67246	4	-	96084231	96086870	TCONS_00154032	3	656	XLOC_041781	S100A3	S100 calcium binding protein A3 [Source:VGNC Symbol;Acc:VGNC:92542]
ENSSSCG00000017522	Upregulated	158974	12	+	24100675	24105640	TCONS_00037235	3	3660	XLOC_010677	SP6	Sp6 transcription factor [Source:VGNC Symbol;Acc:VGNC:93363]
ENSSSCG00000017522	Upregulated	158975	12	+	24100675	24106342	TCONS_00037236	3	3673	XLOC_010677	SP6	Sp6 transcription factor [Source:VGNC Symbol;Acc:VGNC:93363]
ENSSSCG00000017522	Upregulated	158976	12	+	24100675	24106595	TCONS_00037237	3	3889	XLOC_010677	SP6	Sp6 transcription factor [Source:VGNC Symbol;Acc:VGNC:93363]
ENSSSCG00000017522	Upregulated	158977	12	+	24100675	24106693	TCONS_00037238	3	3730	XLOC_010677	SP6	Sp6 transcription factor [Source:VGNC Symbol;Acc:VGNC:93363]
ENSSSCG00000017522	Upregulated	158978	12	+	24100675	24106835	TCONS_00037239	3	3660	XLOC_010677	SP6	Sp6 transcription factor [Source:VGNC Symbol;Acc:VGNC:93363]
ENSSSCG00000017522	Upregulated	158979	12	-	24100797	24105847	TCONS_00043184	2	3696	XLOC_012126	SP6	Sp6 transcription factor [Source:VGNC Symbol;Acc:VGNC:93363]
ENSSSCG00000017522	Upregulated	158980	12	-	24100801	24106792	TCONS_00043185	2	4024	XLOC_012126	SP6	Sp6 transcription factor [Source:VGNC Symbol;Acc:VGNC:93363]
ENSSSCG00000032411	Upregulated	154483	12	-	3139129	3148462	TCONS_00041042	13	4672	XLOC_011603	ENGASE	endo-beta-N-acetylglucosaminidase [Source:VGNC Symbol;Acc:VGNC:87699]
ENSSSCG00000032411	Upregulated	154484	12	-	3139129	3149336	TCONS_00041043	13	5032	XLOC_011603	ENGASE	endo-beta-N-acetylglucosaminidase [Source:VGNC Symbol;Acc:VGNC:87699]
ENSSSCG00000032411	Upregulated	154485	12	-	3139129	3149373	TCONS_00041044	14	4898	XLOC_011603	ENGASE	endo-beta-N-acetylglucosaminidase [Source:VGNC Symbol;Acc:VGNC:87699]
ENSSSCG00000032411	Upregulated	154486	12	+	3139393	3149266	TCONS_00034893	16	4419	XLOC_010178	ENGASE	endo-beta-N-acetylglucosaminidase [Source:VGNC Symbol;Acc:VGNC:87699]
ENSSSCG00000032411	Upregulated	154487	12	+	3139400	3149266	TCONS_00034894	14	4496	XLOC_010178	ENGASE	endo-beta-N-acetylglucosaminidase [Source:VGNC Symbol;Acc:VGNC:87699]
ENSSSCG00000032411	Upregulated	154488	12	+	3139404	3149266	TCONS_00034895	14	4449	XLOC_010178	ENGASE	endo-beta-N-acetylglucosaminidase [Source:VGNC Symbol;Acc:VGNC:87699]
ENSSSCG00000032411	Upregulated	154489	12	+	3139435	3149266	TCONS_00034896	14	4441	XLOC_010178	ENGASE	endo-beta-N-acetylglucosaminidase [Source:VGNC Symbol;Acc:VGNC:87699]
ENSSSCG00000032411	Upregulated	154490	12	+	3139435	3149266	TCONS_00034897	15	4403	XLOC_010178	ENGASE	endo-beta-N-acetylglucosaminidase [Source:VGNC Symbol;Acc:VGNC:87699]
ENSSSCG00000032411	Upregulated	154491	12	-	3139498	3149373	TCONS_00041045	14	4505	XLOC_011603	ENGASE	endo-beta-N-acetylglucosaminidase [Source:VGNC Symbol;Acc:VGNC:87699]
ENSSSCG00000032411	Upregulated	154492	12	-	3144737	3149373	TCONS_00041046	7	1678	XLOC_011603	ENGASE	endo-beta-N-acetylglucosaminidase [Source:VGNC Symbol;Acc:VGNC:87699]
ENSSSCG00000024911	Upregulated	86436	6	+	18651012	18652323	TCONS_00169644	3	423	XLOC_046084	ENSSSCG00000024911
ENSSSCG00000024911	Upregulated	86437	6	+	18651012	18682037	TCONS_00169645	4	311	XLOC_046084	ENSSSCG00000024911
ENSSSCG00000024911	Upregulated	86438	6	-	18651017	18652317	TCONS_00180471	3	412	XLOC_048837	ENSSSCG00000024911
ENSSSCG00000024911	Upregulated	86439	6	+	18651057	18652317	TCONS_00169646	2	306	XLOC_046084	ENSSSCG00000024911
ENSSSCG00000015879	Upregulated	201557	15	+	65796443	65898505	TCONS_00080609	4	431	XLOC_021827	DAPL1	death associated protein like 1 [Source:NCBI gene (formerly Entrezgene);Acc:100157537]
ENSSSCG00000015879	Upregulated	201558	15	+	65796461	65820450	TCONS_00080610	4	522	XLOC_021827	DAPL1	death associated protein like 1 [Source:NCBI gene (formerly Entrezgene);Acc:100157537]
ENSSSCG00000015879	Upregulated	201559	15	+	65796519	65820450	TCONS_00080611	3	376	XLOC_021827	DAPL1	death associated protein like 1 [Source:NCBI gene (formerly Entrezgene);Acc:100157537]
ENSSSCG00000015879	Upregulated	201560	15	+	65806070	65820450	TCONS_00080612	3	563	XLOC_021827	DAPL1	death associated protein like 1 [Source:NCBI gene (formerly Entrezgene);Acc:100157537]
ENSSSCG00000028334	Upregulated	75422	5	-	17914912	17924004	TCONS_00164171	9	2645	XLOC_044539	KRT74	keratin 74 [Source:NCBI gene (formerly Entrezgene);Acc:100511256]
ENSSSCG00000028334	Upregulated	75423	5	+	17914967	17915556	TCONS_00158165	1	590	XLOC_042892	KRT74	keratin 74 [Source:NCBI gene (formerly Entrezgene);Acc:100511256]
ENSSSCG00000004710	Upregulated	9567	1	-	128086131	128126214	TCONS_00015780	14	8091	XLOC_004397	ADAL	adenosine deaminase like [Source:VGNC Symbol;Acc:VGNC:85060]
ENSSSCG00000004710	Upregulated	9569	1	-	128088274	128125967	TCONS_00015782	13	8296	XLOC_004397	ADAL	adenosine deaminase like [Source:VGNC Symbol;Acc:VGNC:85060]
ENSSSCG00000004710	Upregulated	9570	1	-	128088274	128126214	TCONS_00015783	13	10653	XLOC_004397	ADAL	adenosine deaminase like [Source:VGNC Symbol;Acc:VGNC:85060]
ENSSSCG00000004710	Upregulated	9571	1	-	128088274	128126238	TCONS_00015784	12	9738	XLOC_004397	ADAL	adenosine deaminase like [Source:VGNC Symbol;Acc:VGNC:85060]
ENSSSCG00000004710	Upregulated	9572	1	-	128088274	128127825	TCONS_00015785	14	9134	XLOC_004397	ADAL	adenosine deaminase like [Source:VGNC Symbol;Acc:VGNC:85060]
ENSSSCG00000004710	Upregulated	9573	1	-	128088274	128127922	TCONS_00015786	13	13170	XLOC_004397	ADAL	adenosine deaminase like [Source:VGNC Symbol;Acc:VGNC:85060]
ENSSSCG00000004710	Upregulated	9574	1	-	128088274	128127960	TCONS_00015787	12	11389	XLOC_004397	ADAL	adenosine deaminase like [Source:VGNC Symbol;Acc:VGNC:85060]
ENSSSCG00000004710	Upregulated	9575	1	-	128088274	128127965	TCONS_00015788	13	11546	XLOC_004397	ADAL	adenosine deaminase like [Source:VGNC Symbol;Acc:VGNC:85060]
ENSSSCG00000004710	Upregulated	9576	1	-	128089461	128125967	TCONS_00015789	10	10837	XLOC_004397	ADAL	adenosine deaminase like [Source:VGNC Symbol;Acc:VGNC:85060]
ENSSSCG00000004710	Upregulated	9577	1	-	128089461	128127960	TCONS_00015790	13	7234	XLOC_004397	ADAL	adenosine deaminase like [Source:VGNC Symbol;Acc:VGNC:85060]
ENSSSCG00000004710	Upregulated	9578	1	-	128089500	128125648	TCONS_00015791	12	2841	XLOC_004397	ADAL	adenosine deaminase like [Source:VGNC Symbol;Acc:VGNC:85060]
ENSSSCG00000004710	Upregulated	9579	1	-	128089500	128125648	TCONS_00015792	11	2760	XLOC_004397	ADAL	adenosine deaminase like [Source:VGNC Symbol;Acc:VGNC:85060]
ENSSSCG00000004710	Upregulated	9586	1	-	128101699	128125967	TCONS_00015793	9	1527	XLOC_004397	ADAL	adenosine deaminase like [Source:VGNC Symbol;Acc:VGNC:85060]
ENSSSCG00000000249	Upregulated	75424	5	-	17936807	17948937	TCONS_00164172	11	1527	XLOC_044540	KRT72	keratin 72 [Source:HGNC Symbol;Acc:HGNC:28932]
ENSSSCG00000000249	Upregulated	75425	5	-	17936807	17948937	TCONS_00164173	10	1401	XLOC_044540	KRT72	keratin 72 [Source:HGNC Symbol;Acc:HGNC:28932]
ENSSSCG00000003807	Upregulated	102685	6	-	146989241	147098181	TCONS_00188607	21	6296	XLOC_050849	DNAJC6	DnaJ heat shock protein family (Hsp40) member C6 [Source:VGNC Symbol;Acc:VGNC:96625]
ENSSSCG00000003807	Upregulated	102686	6	-	146989241	147098181	TCONS_00188608	21	6296	XLOC_050849	DNAJC6	DnaJ heat shock protein family (Hsp40) member C6 [Source:VGNC Symbol;Acc:VGNC:96625]
ENSSSCG00000003807	Upregulated	102687	6	-	146989241	147152351	TCONS_00188609	22	6212	XLOC_050849	DNAJC6	DnaJ heat shock protein family (Hsp40) member C6 [Source:VGNC Symbol;Acc:VGNC:96625]
ENSSSCG00000003807	Upregulated	102688	6	-	146989241	147155132	TCONS_00188610	22	6063	XLOC_050849	DNAJC6	DnaJ heat shock protein family (Hsp40) member C6 [Source:VGNC Symbol;Acc:VGNC:96625]
ENSSSCG00000003807	Upregulated	102689	6	-	146989241	147155132	TCONS_00188611	21	5985	XLOC_050849	DNAJC6	DnaJ heat shock protein family (Hsp40) member C6 [Source:VGNC Symbol;Acc:VGNC:96625]
ENSSSCG00000003807	Upregulated	102690	6	-	146989241	147155132	TCONS_00188612	20	6349	XLOC_050849	DNAJC6	DnaJ heat shock protein family (Hsp40) member C6 [Source:VGNC Symbol;Acc:VGNC:96625]
ENSSSCG00000003807	Upregulated	102691	6	-	146989241	147160907	TCONS_00188613	22	5812	XLOC_050849	DNAJC6	DnaJ heat shock protein family (Hsp40) member C6 [Source:VGNC Symbol;Acc:VGNC:96625]
ENSSSCG00000003807	Upregulated	102692	6	-	146989325	147098181	TCONS_00188614	19	6441	XLOC_050849	DNAJC6	DnaJ heat shock protein family (Hsp40) member C6 [Source:VGNC Symbol;Acc:VGNC:96625]
ENSSSCG00000003807	Upregulated	102693	6	-	146989351	147104797	TCONS_00188615	21	6187	XLOC_050849	DNAJC6	DnaJ heat shock protein family (Hsp40) member C6 [Source:VGNC Symbol;Acc:VGNC:96625]
ENSSSCG00000003807	Upregulated	102694	6	-	146989351	147155132	TCONS_00188616	22	5953	XLOC_050849	DNAJC6	DnaJ heat shock protein family (Hsp40) member C6 [Source:VGNC Symbol;Acc:VGNC:96625]
ENSSSCG00000003807	Upregulated	102695	6	+	146990218	147155012	TCONS_00177732	20	5539	XLOC_048093	DNAJC6	DnaJ heat shock protein family (Hsp40) member C6 [Source:VGNC Symbol;Acc:VGNC:96625]
ENSSSCG00000003807	Upregulated	102696	6	+	146990224	147145090	TCONS_00177733	19	5129	XLOC_048093	DNAJC6	DnaJ heat shock protein family (Hsp40) member C6 [Source:VGNC Symbol;Acc:VGNC:96625]
ENSSSCG00000003807	Upregulated	102697	6	+	146990255	147008367	TCONS_00177734	6	3024	XLOC_048093	DNAJC6	DnaJ heat shock protein family (Hsp40) member C6 [Source:VGNC Symbol;Acc:VGNC:96625]
ENSSSCG00000003807	Upregulated	102698	6	-	146990255	147155131	TCONS_00188617	19	5199	XLOC_050849	DNAJC6	DnaJ heat shock protein family (Hsp40) member C6 [Source:VGNC Symbol;Acc:VGNC:96625]
ENSSSCG00000003807	Upregulated	102699	6	+	146990309	147154393	TCONS_00177735	20	5325	XLOC_048093	DNAJC6	DnaJ heat shock protein family (Hsp40) member C6 [Source:VGNC Symbol;Acc:VGNC:96625]
ENSSSCG00000003807	Upregulated	102700	6	+	146990320	147155012	TCONS_00177736	19	5015	XLOC_048093	DNAJC6	DnaJ heat shock protein family (Hsp40) member C6 [Source:VGNC Symbol;Acc:VGNC:96625]
ENSSSCG00000003807	Upregulated	102701	6	+	146990325	147145090	TCONS_00177737	20	5106	XLOC_048093	DNAJC6	DnaJ heat shock protein family (Hsp40) member C6 [Source:VGNC Symbol;Acc:VGNC:96625]
ENSSSCG00000003807	Upregulated	102702	6	+	146990325	147148985	TCONS_00177738	19	5009	XLOC_048093	DNAJC6	DnaJ heat shock protein family (Hsp40) member C6 [Source:VGNC Symbol;Acc:VGNC:96625]
ENSSSCG00000003807	Upregulated	102703	6	+	146990325	147149565	TCONS_00177739	18	4976	XLOC_048093	DNAJC6	DnaJ heat shock protein family (Hsp40) member C6 [Source:VGNC Symbol;Acc:VGNC:96625]
ENSSSCG00000003807	Upregulated	102704	6	+	146990325	147155012	TCONS_00177740	16	4688	XLOC_048093	DNAJC6	DnaJ heat shock protein family (Hsp40) member C6 [Source:VGNC Symbol;Acc:VGNC:96625]
ENSSSCG00000003807	Upregulated	102705	6	+	146990325	147155012	TCONS_00177741	18	4892	XLOC_048093	DNAJC6	DnaJ heat shock protein family (Hsp40) member C6 [Source:VGNC Symbol;Acc:VGNC:96625]
ENSSSCG00000003807	Upregulated	102706	6	+	146990325	147155012	TCONS_00177742	20	5088	XLOC_048093	DNAJC6	DnaJ heat shock protein family (Hsp40) member C6 [Source:VGNC Symbol;Acc:VGNC:96625]
ENSSSCG00000003807	Upregulated	102707	6	+	146990326	147104288	TCONS_00177743	16	4154	XLOC_048093	DNAJC6	DnaJ heat shock protein family (Hsp40) member C6 [Source:VGNC Symbol;Acc:VGNC:96625]
ENSSSCG00000044096	Upregulated	181064	13	+	194454153	194460469	TCONS_00054215	2	6258	XLOC_015028	ENSSSCG00000044096
ENSSSCG00000044096	Upregulated	181065	13	-	194456833	194458105	TCONS_00062964	1	1273	XLOC_017321	ENSSSCG00000044096
ENSSSCG00000017219	Upregulated	155470	12	+	6291527	6312259	TCONS_00035405	14	6277	XLOC_010279	HID1	HID1 domain containing [Source:VGNC Symbol;Acc:VGNC:88879]
ENSSSCG00000017219	Upregulated	155471	12	+	6291527	6312277	TCONS_00035406	15	6172	XLOC_010279	HID1	HID1 domain containing [Source:VGNC Symbol;Acc:VGNC:88879]
ENSSSCG00000017219	Upregulated	155472	12	+	6291527	6312277	TCONS_00035407	17	5411	XLOC_010279	HID1	HID1 domain containing [Source:VGNC Symbol;Acc:VGNC:88879]
ENSSSCG00000017219	Upregulated	155473	12	+	6291527	6312277	TCONS_00035408	18	4868	XLOC_010279	HID1	HID1 domain containing [Source:VGNC Symbol;Acc:VGNC:88879]
ENSSSCG00000017219	Upregulated	155474	12	+	6291527	6313714	TCONS_00035409	20	4904	XLOC_010279	HID1	HID1 domain containing [Source:VGNC Symbol;Acc:VGNC:88879]
ENSSSCG00000017219	Upregulated	155475	12	+	6291527	6313714	TCONS_00035410	19	5146	XLOC_010279	HID1	HID1 domain containing [Source:VGNC Symbol;Acc:VGNC:88879]
ENSSSCG00000017219	Upregulated	155476	12	+	6291527	6313714	TCONS_00035411	19	4739	XLOC_010279	HID1	HID1 domain containing [Source:VGNC Symbol;Acc:VGNC:88879]
ENSSSCG00000017219	Upregulated	155477	12	-	6291564	6307846	TCONS_00041516	13	2223	XLOC_011707	HID1	HID1 domain containing [Source:VGNC Symbol;Acc:VGNC:88879]
ENSSSCG00000017219	Upregulated	155479	12	+	6291574	6310949	TCONS_00035412	18	3086	XLOC_010279	HID1	HID1 domain containing [Source:VGNC Symbol;Acc:VGNC:88879]
ENSSSCG00000017219	Upregulated	155480	12	+	6291603	6310950	TCONS_00035413	20	3331	XLOC_010279	HID1	HID1 domain containing [Source:VGNC Symbol;Acc:VGNC:88879]
ENSSSCG00000004291	Upregulated	4105	1	+	54323405	54448742	TCONS_00001975	10	2115	XLOC_000607	NT5E	5'-nucleotidase ecto [Source:VGNC Symbol;Acc:VGNC:90925]
ENSSSCG00000004291	Upregulated	4107	1	+	54356476	54448742	TCONS_00001977	10	2101	XLOC_000607	NT5E	5'-nucleotidase ecto [Source:VGNC Symbol;Acc:VGNC:90925]
ENSSSCG00000004291	Upregulated	4115	1	+	54400810	54448742	TCONS_00001982	9	2112	XLOC_000607	NT5E	5'-nucleotidase ecto [Source:VGNC Symbol;Acc:VGNC:90925]
ENSSSCG00000004291	Upregulated	4116	1	+	54400810	54448742	TCONS_00001983	8	1962	XLOC_000607	NT5E	5'-nucleotidase ecto [Source:VGNC Symbol;Acc:VGNC:90925]
ENSSSCG00000004291	Upregulated	4117	1	-	54400972	54450669	TCONS_00013082	10	3782	XLOC_003691	NT5E	5'-nucleotidase ecto [Source:VGNC Symbol;Acc:VGNC:90925]
ENSSSCG00000004291	Upregulated	4119	1	+	54430735	54547163	TCONS_00001984	27	2860	XLOC_000612	NT5E	5'-nucleotidase ecto [Source:VGNC Symbol;Acc:VGNC:90925]
ENSSSCG00000004291	Upregulated	4120	1	+	54444242	54547163	TCONS_00001985	28	2954	XLOC_000612	NT5E	5'-nucleotidase ecto [Source:VGNC Symbol;Acc:VGNC:90925]
ENSSSCG00000004291	Upregulated	4121	1	+	54447381	54547163	TCONS_00001986	28	2974	XLOC_000612	NT5E	5'-nucleotidase ecto [Source:VGNC Symbol;Acc:VGNC:90925]
ENSSSCG00000008334	Upregulated	52812	3	-	72517385	72544603	TCONS_00140065	7	4467	XLOC_037983	MXD1	MAX dimerization protein 1 [Source:VGNC Symbol;Acc:VGNC:90492]
ENSSSCG00000008334	Upregulated	52813	3	+	72517813	72545291	TCONS_00131930	6	5717	XLOC_035844	MXD1	MAX dimerization protein 1 [Source:VGNC Symbol;Acc:VGNC:90492]
ENSSSCG00000008334	Upregulated	52814	3	-	72517832	72545077	TCONS_00140066	6	5484	XLOC_037983	MXD1	MAX dimerization protein 1 [Source:VGNC Symbol;Acc:VGNC:90492]
ENSSSCG00000008334	Upregulated	52815	3	-	72517832	72545247	TCONS_00140067	6	5657	XLOC_037983	MXD1	MAX dimerization protein 1 [Source:VGNC Symbol;Acc:VGNC:90492]
ENSSSCG00000008334	Upregulated	52816	3	-	72517837	72545247	TCONS_00140068	7	3978	XLOC_037983	MXD1	MAX dimerization protein 1 [Source:VGNC Symbol;Acc:VGNC:90492]
ENSSSCG00000008334	Upregulated	52817	3	-	72517837	72545247	TCONS_00140069	6	3948	XLOC_037983	MXD1	MAX dimerization protein 1 [Source:VGNC Symbol;Acc:VGNC:90492]
ENSSSCG00000008334	Upregulated	52818	3	+	72517895	72544440	TCONS_00131931	7	5308	XLOC_035844	MXD1	MAX dimerization protein 1 [Source:VGNC Symbol;Acc:VGNC:90492]
ENSSSCG00000008334	Upregulated	52819	3	-	72523408	72531943	TCONS_00140070	2	714	XLOC_037984	MXD1	MAX dimerization protein 1 [Source:VGNC Symbol;Acc:VGNC:90492]
ENSSSCG00000037222	Upregulated	182740	13	-	207393267	207394591	TCONS_00063764	1	1325	XLOC_017530	ENSSSCG00000037222
ENSSSCG00000037222	Upregulated	182741	13	+	207393316	207394632	TCONS_00055082	2	1274	XLOC_015255	ENSSSCG00000037222
ENSSSCG00000037222	Upregulated	182742	13	+	207393407	207393880	TCONS_00055083	1	474	XLOC_015255	ENSSSCG00000037222
ENSSSCG00000012880	Upregulated	23328	2	+	4233099	4293884	TCONS_00107305	20	5430	XLOC_029522	CPT1A	carnitine palmitoyltransferase 1A [Source:VGNC Symbol;Acc:VGNC:86964]
ENSSSCG00000012880	Upregulated	23329	2	+	4233099	4293984	TCONS_00107306	22	5366	XLOC_029522	CPT1A	carnitine palmitoyltransferase 1A [Source:VGNC Symbol;Acc:VGNC:86964]
ENSSSCG00000012880	Upregulated	23330	2	+	4233099	4293984	TCONS_00107307	20	5395	XLOC_029522	CPT1A	carnitine palmitoyltransferase 1A [Source:VGNC Symbol;Acc:VGNC:86964]
ENSSSCG00000012880	Upregulated	23331	2	+	4233099	4293984	TCONS_00107308	21	5317	XLOC_029522	CPT1A	carnitine palmitoyltransferase 1A [Source:VGNC Symbol;Acc:VGNC:86964]
ENSSSCG00000012880	Upregulated	23332	2	+	4233687	4293984	TCONS_00107309	20	2645	XLOC_029522	CPT1A	carnitine palmitoyltransferase 1A [Source:VGNC Symbol;Acc:VGNC:86964]
ENSSSCG00000012880	Upregulated	23333	2	+	4234757	4293911	TCONS_00107310	19	4450	XLOC_029522	CPT1A	carnitine palmitoyltransferase 1A [Source:VGNC Symbol;Acc:VGNC:86964]
ENSSSCG00000012880	Upregulated	23334	2	-	4234786	4293871	TCONS_00116976	19	4437	XLOC_032010	CPT1A	carnitine palmitoyltransferase 1A [Source:VGNC Symbol;Acc:VGNC:86964]
ENSSSCG00000012880	Upregulated	23335	2	-	4234786	4293942	TCONS_00116977	20	4370	XLOC_032010	CPT1A	carnitine palmitoyltransferase 1A [Source:VGNC Symbol;Acc:VGNC:86964]
ENSSSCG00000012880	Upregulated	23336	2	+	4234812	4293750	TCONS_00107311	21	4205	XLOC_029522	CPT1A	carnitine palmitoyltransferase 1A [Source:VGNC Symbol;Acc:VGNC:86964]
ENSSSCG00000012880	Upregulated	23337	2	-	4242849	4293942	TCONS_00116978	19	4466	XLOC_032010	CPT1A	carnitine palmitoyltransferase 1A [Source:VGNC Symbol;Acc:VGNC:86964]
ENSSSCG00000012880	Upregulated	23339	2	-	4263970	4293898	TCONS_00116980	13	3615	XLOC_032010	CPT1A	carnitine palmitoyltransferase 1A [Source:VGNC Symbol;Acc:VGNC:86964]
ENSSSCG00000012880	Upregulated	23340	2	-	4265266	4293887	TCONS_00116981	12	3529	XLOC_032010	CPT1A	carnitine palmitoyltransferase 1A [Source:VGNC Symbol;Acc:VGNC:86964]
ENSSSCG00000012880	Upregulated	23341	2	-	4265266	4293893	TCONS_00116982	12	3582	XLOC_032010	CPT1A	carnitine palmitoyltransferase 1A [Source:VGNC Symbol;Acc:VGNC:86964]
ENSSSCG00000012880	Upregulated	23342	2	-	4265266	4293893	TCONS_00116983	13	3688	XLOC_032010	CPT1A	carnitine palmitoyltransferase 1A [Source:VGNC Symbol;Acc:VGNC:86964]
ENSSSCG00000012880	Upregulated	23343	2	-	4271041	4293905	TCONS_00116984	10	3233	XLOC_032010	CPT1A	carnitine palmitoyltransferase 1A [Source:VGNC Symbol;Acc:VGNC:86964]
ENSSSCG00000012880	Upregulated	23344	2	-	4280124	4293901	TCONS_00116985	6	2701	XLOC_032010	CPT1A	carnitine palmitoyltransferase 1A [Source:VGNC Symbol;Acc:VGNC:86964]
ENSSSCG00000012880	Upregulated	23345	2	+	4283941	4293984	TCONS_00107312	2	1641	XLOC_029522	CPT1A	carnitine palmitoyltransferase 1A [Source:VGNC Symbol;Acc:VGNC:86964]
ENSSSCG00000012880	Upregulated	23346	2	-	4286323	4293877	TCONS_00116986	6	2642	XLOC_032010	CPT1A	carnitine palmitoyltransferase 1A [Source:VGNC Symbol;Acc:VGNC:86964]
ENSSSCG00000012880	Upregulated	23347	2	-	4286333	4293898	TCONS_00116987	5	2500	XLOC_032010	CPT1A	carnitine palmitoyltransferase 1A [Source:VGNC Symbol;Acc:VGNC:86964]
ENSSSCG00000012880	Upregulated	23348	2	-	4289879	4293907	TCONS_00116988	4	2126	XLOC_032010	CPT1A	carnitine palmitoyltransferase 1A [Source:VGNC Symbol;Acc:VGNC:86964]
ENSSSCG00000014363	Upregulated	40558	2	+	142128947	142142662	TCONS_00115710	22	3756	XLOC_031674	SLC4A9	solute carrier family 4 member 9 [Source:VGNC Symbol;Acc:VGNC:93136]
ENSSSCG00000014363	Upregulated	40559	2	+	142128947	142142662	TCONS_00115711	21	3567	XLOC_031674	SLC4A9	solute carrier family 4 member 9 [Source:VGNC Symbol;Acc:VGNC:93136]
ENSSSCG00000014363	Upregulated	40560	2	-	142133529	142134754	TCONS_00125754	2	720	XLOC_034240	SLC4A9	solute carrier family 4 member 9 [Source:VGNC Symbol;Acc:VGNC:93136]
ENSSSCG00000000235	Upregulated	75391	5	-	17717924	17732009	TCONS_00164147	9	1599	XLOC_044531	KRT82	keratin 82 [Source:VGNC Symbol;Acc:VGNC:89598]
ENSSSCG00000024514	Upregulated	210483	16	+	43273242	43297306	TCONS_00090144	3	1022	XLOC_024594	SHISAL2B	shisa like 2B [Source:VGNC Symbol;Acc:VGNC:92852]
ENSSSCG00000000062	Upregulated	73150	5	-	6913486	6988422	TCONS_00163052	5	2207	XLOC_044232	CSDC2	cold shock domain containing C2 [Source:VGNC Symbol;Acc:VGNC:87028]
ENSSSCG00000000062	Upregulated	73174	5	-	6975840	6988422	TCONS_00163061	4	2646	XLOC_044232	CSDC2	cold shock domain containing C2 [Source:VGNC Symbol;Acc:VGNC:87028]
ENSSSCG00000000062	Upregulated	73175	5	-	6975840	6988422	TCONS_00163062	4	2710	XLOC_044232	CSDC2	cold shock domain containing C2 [Source:VGNC Symbol;Acc:VGNC:87028]
ENSSSCG00000023604	Upregulated	121116	8	+	12590330	12619100	TCONS_00204922	13	2101	XLOC_055402	LAP3	leucine aminopeptidase 3 [Source:VGNC Symbol;Acc:VGNC:89635]
ENSSSCG00000023604	Upregulated	121117	8	+	12590330	12619100	TCONS_00204923	12	2044	XLOC_055402	LAP3	leucine aminopeptidase 3 [Source:VGNC Symbol;Acc:VGNC:89635]
ENSSSCG00000023604	Upregulated	121118	8	-	12590409	12609434	TCONS_00209512	9	1098	XLOC_056742	LAP3	leucine aminopeptidase 3 [Source:VGNC Symbol;Acc:VGNC:89635]
ENSSSCG00000023604	Upregulated	121119	8	-	12590409	12619091	TCONS_00209513	13	2005	XLOC_056742	LAP3	leucine aminopeptidase 3 [Source:VGNC Symbol;Acc:VGNC:89635]
ENSSSCG00000023604	Upregulated	121120	8	-	12590409	12619091	TCONS_00209514	13	2000	XLOC_056742	LAP3	leucine aminopeptidase 3 [Source:VGNC Symbol;Acc:VGNC:89635]
ENSSSCG00000023604	Upregulated	121121	8	-	12590409	12619100	TCONS_00209515	13	1954	XLOC_056742	LAP3	leucine aminopeptidase 3 [Source:VGNC Symbol;Acc:VGNC:89635]
ENSSSCG00000023604	Upregulated	121122	8	-	12590409	12619101	TCONS_00209516	13	2018	XLOC_056742	LAP3	leucine aminopeptidase 3 [Source:VGNC Symbol;Acc:VGNC:89635]
ENSSSCG00000023604	Upregulated	121123	8	-	12590409	12619102	TCONS_00209517	12	1918	XLOC_056742	LAP3	leucine aminopeptidase 3 [Source:VGNC Symbol;Acc:VGNC:89635]
ENSSSCG00000023604	Upregulated	121124	8	-	12590409	12619102	TCONS_00209518	13	2024	XLOC_056742	LAP3	leucine aminopeptidase 3 [Source:VGNC Symbol;Acc:VGNC:89635]
ENSSSCG00000023604	Upregulated	121125	8	-	12590409	12619102	TCONS_00209519	13	1949	XLOC_056742	LAP3	leucine aminopeptidase 3 [Source:VGNC Symbol;Acc:VGNC:89635]
ENSSSCG00000023604	Upregulated	121129	8	+	12590535	12619069	TCONS_00204924	14	2279	XLOC_055402	LAP3	leucine aminopeptidase 3 [Source:VGNC Symbol;Acc:VGNC:89635]
ENSSSCG00000023604	Upregulated	121130	8	+	12591331	12619102	TCONS_00204925	13	2109	XLOC_055402	LAP3	leucine aminopeptidase 3 [Source:VGNC Symbol;Acc:VGNC:89635]
ENSSSCG00000023604	Upregulated	121131	8	+	12591331	12893851	TCONS_00204926	14	1896	XLOC_055402	LAP3	leucine aminopeptidase 3 [Source:VGNC Symbol;Acc:VGNC:89635]
ENSSSCG00000003481	Upregulated	95711	6	+	75769207	75871930	TCONS_00174357	5	3517	XLOC_047264	PADI1	peptidyl arginine deiminase 1 [Source:VGNC Symbol;Acc:VGNC:91145]
ENSSSCG00000003481	Upregulated	95713	6	+	75829989	75871929	TCONS_00174359	16	4230	XLOC_047264	PADI1	peptidyl arginine deiminase 1 [Source:VGNC Symbol;Acc:VGNC:91145]
ENSSSCG00000003481	Upregulated	95714	6	+	75829989	75871930	TCONS_00174360	13	5615	XLOC_047264	PADI1	peptidyl arginine deiminase 1 [Source:VGNC Symbol;Acc:VGNC:91145]
ENSSSCG00000003481	Upregulated	95715	6	+	75829989	75871930	TCONS_00174361	15	5854	XLOC_047264	PADI1	peptidyl arginine deiminase 1 [Source:VGNC Symbol;Acc:VGNC:91145]
ENSSSCG00000003481	Upregulated	95716	6	+	75829989	75871930	TCONS_00174362	15	4050	XLOC_047264	PADI1	peptidyl arginine deiminase 1 [Source:VGNC Symbol;Acc:VGNC:91145]
ENSSSCG00000003481	Upregulated	95717	6	+	75829989	75871930	TCONS_00174363	14	5750	XLOC_047264	PADI1	peptidyl arginine deiminase 1 [Source:VGNC Symbol;Acc:VGNC:91145]
ENSSSCG00000003481	Upregulated	95718	6	+	75829989	75871930	TCONS_00174364	14	5645	XLOC_047264	PADI1	peptidyl arginine deiminase 1 [Source:VGNC Symbol;Acc:VGNC:91145]
ENSSSCG00000003481	Upregulated	95719	6	+	75829989	75871930	TCONS_00174365	15	5802	XLOC_047264	PADI1	peptidyl arginine deiminase 1 [Source:VGNC Symbol;Acc:VGNC:91145]
ENSSSCG00000003481	Upregulated	95720	6	+	75829989	75871930	TCONS_00174366	11	5409	XLOC_047264	PADI1	peptidyl arginine deiminase 1 [Source:VGNC Symbol;Acc:VGNC:91145]
ENSSSCG00000003481	Upregulated	95721	6	+	75829989	75871930	TCONS_00174367	16	4996	XLOC_047264	PADI1	peptidyl arginine deiminase 1 [Source:VGNC Symbol;Acc:VGNC:91145]
ENSSSCG00000003481	Upregulated	95722	6	+	75829989	75871930	TCONS_00174368	13	5635	XLOC_047264	PADI1	peptidyl arginine deiminase 1 [Source:VGNC Symbol;Acc:VGNC:91145]
ENSSSCG00000003481	Upregulated	95723	6	-	75830052	75871874	TCONS_00185024	15	5734	XLOC_050058	PADI1	peptidyl arginine deiminase 1 [Source:VGNC Symbol;Acc:VGNC:91145]
ENSSSCG00000003481	Upregulated	95724	6	-	75830052	75871887	TCONS_00185025	15	5693	XLOC_050058	PADI1	peptidyl arginine deiminase 1 [Source:VGNC Symbol;Acc:VGNC:91145]
ENSSSCG00000003481	Upregulated	95725	6	-	75830052	75871892	TCONS_00185026	16	5362	XLOC_050058	PADI1	peptidyl arginine deiminase 1 [Source:VGNC Symbol;Acc:VGNC:91145]
ENSSSCG00000003481	Upregulated	95726	6	-	75830052	75871902	TCONS_00185027	16	4039	XLOC_050058	PADI1	peptidyl arginine deiminase 1 [Source:VGNC Symbol;Acc:VGNC:91145]
ENSSSCG00000003481	Upregulated	95727	6	-	75830052	75871925	TCONS_00185028	15	3798	XLOC_050058	PADI1	peptidyl arginine deiminase 1 [Source:VGNC Symbol;Acc:VGNC:91145]
ENSSSCG00000003481	Upregulated	95728	6	-	75830052	75871925	TCONS_00185029	16	4163	XLOC_050058	PADI1	peptidyl arginine deiminase 1 [Source:VGNC Symbol;Acc:VGNC:91145]
ENSSSCG00000003481	Upregulated	95729	6	-	75830052	75872017	TCONS_00185030	16	5798	XLOC_050058	PADI1	peptidyl arginine deiminase 1 [Source:VGNC Symbol;Acc:VGNC:91145]
ENSSSCG00000003481	Upregulated	95730	6	+	75833648	75871930	TCONS_00174369	15	3874	XLOC_047264	PADI1	peptidyl arginine deiminase 1 [Source:VGNC Symbol;Acc:VGNC:91145]
ENSSSCG00000003481	Upregulated	95731	6	+	75833663	75863883	TCONS_00174370	11	2941	XLOC_047264	PADI1	peptidyl arginine deiminase 1 [Source:VGNC Symbol;Acc:VGNC:91145]
ENSSSCG00000003481	Upregulated	95732	6	+	75833685	75871930	TCONS_00174371	13	5373	XLOC_047264	PADI1	peptidyl arginine deiminase 1 [Source:VGNC Symbol;Acc:VGNC:91145]
ENSSSCG00000003481	Upregulated	95733	6	+	75848238	75871930	TCONS_00174372	13	5376	XLOC_047264	PADI1	peptidyl arginine deiminase 1 [Source:VGNC Symbol;Acc:VGNC:91145]
ENSSSCG00000003481	Upregulated	95734	6	-	75859067	75871903	TCONS_00185031	6	2747	XLOC_050058	PADI1	peptidyl arginine deiminase 1 [Source:VGNC Symbol;Acc:VGNC:91145]
ENSSSCG00000003481	Upregulated	95735	6	+	75864858	75871930	TCONS_00174373	4	2562	XLOC_047264	PADI1	peptidyl arginine deiminase 1 [Source:VGNC Symbol;Acc:VGNC:91145]
ENSSSCG00000017762	Upregulated	161755	12	+	44758373	44827323	TCONS_00038581	9	1695	XLOC_011001	FOXN1	forkhead box N1 [Source:VGNC Symbol;Acc:VGNC:88218]
ENSSSCG00000017762	Upregulated	161761	12	-	44765135	44799329	TCONS_00044618	9	6966	XLOC_012501	FOXN1	forkhead box N1 [Source:VGNC Symbol;Acc:VGNC:88218]
ENSSSCG00000017762	Upregulated	161765	12	+	44765260	44795286	TCONS_00038585	9	2798	XLOC_011000	FOXN1	forkhead box N1 [Source:VGNC Symbol;Acc:VGNC:88218]
ENSSSCG00000017762	Upregulated	161766	12	+	44765260	44799370	TCONS_00038586	10	6745	XLOC_011000	FOXN1	forkhead box N1 [Source:VGNC Symbol;Acc:VGNC:88218]
ENSSSCG00000017762	Upregulated	161767	12	+	44765260	44799370	TCONS_00038587	9	7084	XLOC_011000	FOXN1	forkhead box N1 [Source:VGNC Symbol;Acc:VGNC:88218]
ENSSSCG00000017762	Upregulated	161769	12	+	44769166	44807218	TCONS_00038588	7	2167	XLOC_011012	FOXN1	forkhead box N1 [Source:VGNC Symbol;Acc:VGNC:88218]
ENSSSCG00000017762	Upregulated	161770	12	-	44772704	44799329	TCONS_00044623	9	6739	XLOC_012501	FOXN1	forkhead box N1 [Source:VGNC Symbol;Acc:VGNC:88218]
ENSSSCG00000017762	Upregulated	161771	12	-	44772704	44799329	TCONS_00044624	9	6316	XLOC_012501	FOXN1	forkhead box N1 [Source:VGNC Symbol;Acc:VGNC:88218]
ENSSSCG00000017762	Upregulated	161772	12	-	44772704	44799329	TCONS_00044625	9	6722	XLOC_012501	FOXN1	forkhead box N1 [Source:VGNC Symbol;Acc:VGNC:88218]
ENSSSCG00000017762	Upregulated	161773	12	-	44772704	44799329	TCONS_00044626	9	6742	XLOC_012501	FOXN1	forkhead box N1 [Source:VGNC Symbol;Acc:VGNC:88218]
ENSSSCG00000017762	Upregulated	161774	12	+	44772764	44799370	TCONS_00038589	9	6703	XLOC_011000	FOXN1	forkhead box N1 [Source:VGNC Symbol;Acc:VGNC:88218]
ENSSSCG00000017762	Upregulated	161775	12	+	44772770	44799370	TCONS_00038590	9	6687	XLOC_011000	FOXN1	forkhead box N1 [Source:VGNC Symbol;Acc:VGNC:88218]
ENSSSCG00000017762	Upregulated	161776	12	+	44772773	44799370	TCONS_00038591	9	6699	XLOC_011000	FOXN1	forkhead box N1 [Source:VGNC Symbol;Acc:VGNC:88218]
ENSSSCG00000017762	Upregulated	161777	12	+	44784948	44799370	TCONS_00038592	7	6134	XLOC_011000	FOXN1	forkhead box N1 [Source:VGNC Symbol;Acc:VGNC:88218]
ENSSSCG00000017762	Upregulated	161778	12	+	44784972	44799370	TCONS_00038593	5	6310	XLOC_011000	FOXN1	forkhead box N1 [Source:VGNC Symbol;Acc:VGNC:88218]
ENSSSCG00000017762	Upregulated	161779	12	-	44785107	44799329	TCONS_00044627	7	6053	XLOC_012501	FOXN1	forkhead box N1 [Source:VGNC Symbol;Acc:VGNC:88218]
ENSSSCG00000017762	Upregulated	161780	12	+	44787470	44859457	TCONS_00038594	4	3882	XLOC_011000	FOXN1	forkhead box N1 [Source:VGNC Symbol;Acc:VGNC:88218]
ENSSSCG00000038521	Upregulated	10269	1	+	130355718	130363899	TCONS_00005053	4	6679	XLOC_001363	CHAC1	ChaC glutathione specific gamma-glutamylcyclotransferase 1 [Source:VGNC Symbol;Acc:VGNC:86619]
ENSSSCG00000038521	Upregulated	10270	1	+	130355718	130363899	TCONS_00005054	5	6779	XLOC_001363	CHAC1	ChaC glutathione specific gamma-glutamylcyclotransferase 1 [Source:VGNC Symbol;Acc:VGNC:86619]
ENSSSCG00000038521	Upregulated	10272	1	-	130360508	130495093	TCONS_00016141	3	1297	XLOC_004445	CHAC1	ChaC glutathione specific gamma-glutamylcyclotransferase 1 [Source:VGNC Symbol;Acc:VGNC:86619]
ENSSSCG00000038521	Upregulated	10273	1	-	130360513	130363308	TCONS_00016142	3	1549	XLOC_004445	CHAC1	ChaC glutathione specific gamma-glutamylcyclotransferase 1 [Source:VGNC Symbol;Acc:VGNC:86619]
ENSSSCG00000038521	Upregulated	10274	1	-	130361240	130363308	TCONS_00016143	4	687	XLOC_004445	CHAC1	ChaC glutathione specific gamma-glutamylcyclotransferase 1 [Source:VGNC Symbol;Acc:VGNC:86619]
ENSSSCG00000000247	Upregulated	75416	5	-	17895713	17897738	TCONS_00164166	2	513	XLOC_044538	KRT71	keratin 71 [Source:HGNC Symbol;Acc:HGNC:28927]
ENSSSCG00000000247	Upregulated	75417	5	-	17895713	17899793	TCONS_00164167	2	517	XLOC_044538	KRT71	keratin 71 [Source:HGNC Symbol;Acc:HGNC:28927]
ENSSSCG00000000247	Upregulated	75418	5	-	17895718	17905181	TCONS_00164168	9	2241	XLOC_044538	KRT71	keratin 71 [Source:HGNC Symbol;Acc:HGNC:28927]
ENSSSCG00000000247	Upregulated	75419	5	+	17895720	17905164	TCONS_00158164	9	2222	XLOC_042891	KRT71	keratin 71 [Source:HGNC Symbol;Acc:HGNC:28927]
ENSSSCG00000000247	Upregulated	75420	5	-	17896310	17905181	TCONS_00164169	9	1628	XLOC_044538	KRT71	keratin 71 [Source:HGNC Symbol;Acc:HGNC:28927]
ENSSSCG00000000247	Upregulated	75421	5	-	17896310	17905181	TCONS_00164170	9	1616	XLOC_044538	KRT71	keratin 71 [Source:HGNC Symbol;Acc:HGNC:28927]
ENSSSCG00000043969	Upregulated	167090	13	-	22869492	22872478	TCONS_00056005	2	2801	XLOC_015498	ENSSSCG00000043969
ENSSSCG00000043969	Upregulated	167091	13	-	22869492	22872542	TCONS_00056006	3	2744	XLOC_015498	ENSSSCG00000043969
ENSSSCG00000010650	Upregulated	196273	14	-	124396967	124642093	TCONS_00078037	2	155	XLOC_021056	ENSSSCG00000010650
ENSSSCG00000010650	Upregulated	196339	14	-	124630798	124672174	TCONS_00078058	22	3510	XLOC_021061	ENSSSCG00000010650
ENSSSCG00000010650	Upregulated	196340	14	+	124636817	124638859	TCONS_00070623	2	229	XLOC_019225	ENSSSCG00000010650
ENSSSCG00000010650	Upregulated	196342	14	-	124653273	124674700	TCONS_00078059	2	601	XLOC_021062	ENSSSCG00000010650
ENSSSCG00000051424	Upregulated	167072	13	+	22851523	22872947	TCONS_00047230	15	2757	XLOC_013163	ENSSSCG00000051424
ENSSSCG00000051424	Upregulated	167073	13	+	22851523	22872947	TCONS_00047231	15	2697	XLOC_013163	ENSSSCG00000051424
ENSSSCG00000051424	Upregulated	167077	13	+	22851587	22872947	TCONS_00047234	15	2640	XLOC_013163	ENSSSCG00000051424
ENSSSCG00000051424	Upregulated	167078	13	+	22851588	22872947	TCONS_00047235	15	2536	XLOC_013163	ENSSSCG00000051424
ENSSSCG00000051424	Upregulated	167079	13	+	22851591	22872947	TCONS_00047236	14	2726	XLOC_013163	ENSSSCG00000051424
ENSSSCG00000051424	Upregulated	167080	13	+	22851591	22873151	TCONS_00047237	16	2681	XLOC_013163	ENSSSCG00000051424
ENSSSCG00000051424	Upregulated	167081	13	+	22851591	22873151	TCONS_00047238	15	2479	XLOC_013163	ENSSSCG00000051424
ENSSSCG00000051424	Upregulated	167084	13	+	22851607	22872947	TCONS_00047241	15	2620	XLOC_013163	ENSSSCG00000051424
ENSSSCG00000051424	Upregulated	167086	13	+	22852153	22872947	TCONS_00047243	14	2210	XLOC_013163	ENSSSCG00000051424
ENSSSCG00000051424	Upregulated	167087	13	+	22852716	22872947	TCONS_00047244	11	1968	XLOC_013163	ENSSSCG00000051424
ENSSSCG00000051424	Upregulated	167092	13	+	22869660	22872477	TCONS_00047245	2	2615	XLOC_013164	ENSSSCG00000051424
ENSSSCG00000011014	Upregulated	145328	10	+	40053354	40060323	TCONS_00024176	3	2904	XLOC_006800	BAMBI	BMP and activin membrane bound inhibitor [Source:VGNC Symbol;Acc:VGNC:96238]
ENSSSCG00000011014	Upregulated	145329	10	+	40053354	40162127	TCONS_00024177	4	1266	XLOC_006800	BAMBI	BMP and activin membrane bound inhibitor [Source:VGNC Symbol;Acc:VGNC:96238]
ENSSSCG00000011014	Upregulated	145330	10	+	40053354	40165816	TCONS_00024178	4	1319	XLOC_006800	BAMBI	BMP and activin membrane bound inhibitor [Source:VGNC Symbol;Acc:VGNC:96238]
ENSSSCG00000011014	Upregulated	145331	10	-	40053606	40106949	TCONS_00027639	5	1764	XLOC_007835	BAMBI	BMP and activin membrane bound inhibitor [Source:VGNC Symbol;Acc:VGNC:96238]
ENSSSCG00000011014	Upregulated	145332	10	-	40053623	40060296	TCONS_00027640	3	2608	XLOC_007835	BAMBI	BMP and activin membrane bound inhibitor [Source:VGNC Symbol;Acc:VGNC:96238]
ENSSSCG00000011014	Upregulated	145333	10	+	40055607	40060159	TCONS_00024179	2	4120	XLOC_006800	BAMBI	BMP and activin membrane bound inhibitor [Source:VGNC Symbol;Acc:VGNC:96238]
ENSSSCG00000026043	Upregulated	216209	17	-	33123452	33265386	TCONS_00099396	2	190	XLOC_027283	ENSSSCG00000026043
ENSSSCG00000026043	Upregulated	216220	17	+	33191692	33214659	TCONS_00095601	6	1805	XLOC_026281	ENSSSCG00000026043
ENSSSCG00000026043	Upregulated	216221	17	-	33191899	33200924	TCONS_00099403	5	1407	XLOC_027290	ENSSSCG00000026043
ENSSSCG00000026043	Upregulated	216222	17	-	33191908	33236609	TCONS_00099404	13	3301	XLOC_027290	ENSSSCG00000026043
ENSSSCG00000026043	Upregulated	216223	17	+	33191909	33193422	TCONS_00095602	3	810	XLOC_026281	ENSSSCG00000026043
ENSSSCG00000026043	Upregulated	216224	17	+	33191909	33197029	TCONS_00095603	4	966	XLOC_026281	ENSSSCG00000026043
ENSSSCG00000026043	Upregulated	216225	17	+	33191914	33235940	TCONS_00095604	13	2626	XLOC_026281	ENSSSCG00000026043
ENSSSCG00000026043	Upregulated	216226	17	+	33191920	33235940	TCONS_00095605	13	2531	XLOC_026281	ENSSSCG00000026043
ENSSSCG00000026043	Upregulated	216227	17	-	33196742	33200555	TCONS_00099405	3	381	XLOC_027290	ENSSSCG00000026043
ENSSSCG00000025114	Upregulated	74969	5	-	15578122	15775571	TCONS_00163955	50	7714	XLOC_044472	FMNL3	formin like 3 [Source:VGNC Symbol;Acc:VGNC:88169]
ENSSSCG00000025114	Upregulated	74972	5	+	15592619	15606023	TCONS_00157935	22	3519	XLOC_042831	FMNL3	formin like 3 [Source:VGNC Symbol;Acc:VGNC:88169]
ENSSSCG00000025114	Upregulated	74973	5	+	15592619	15619482	TCONS_00157936	26	3900	XLOC_042831	FMNL3	formin like 3 [Source:VGNC Symbol;Acc:VGNC:88169]
ENSSSCG00000025114	Upregulated	74974	5	+	15592619	15646008	TCONS_00157937	26	4131	XLOC_042831	FMNL3	formin like 3 [Source:VGNC Symbol;Acc:VGNC:88169]
ENSSSCG00000025114	Upregulated	74975	5	+	15592619	15646008	TCONS_00157938	26	4147	XLOC_042831	FMNL3	formin like 3 [Source:VGNC Symbol;Acc:VGNC:88169]
ENSSSCG00000025114	Upregulated	74976	5	-	15592665	15594357	TCONS_00163957	3	1045	XLOC_044472	FMNL3	formin like 3 [Source:VGNC Symbol;Acc:VGNC:88169]
ENSSSCG00000025114	Upregulated	74977	5	-	15592665	15605820	TCONS_00163958	21	3344	XLOC_044472	FMNL3	formin like 3 [Source:VGNC Symbol;Acc:VGNC:88169]
ENSSSCG00000025114	Upregulated	74978	5	-	15592665	15632210	TCONS_00163959	27	3929	XLOC_044472	FMNL3	formin like 3 [Source:VGNC Symbol;Acc:VGNC:88169]
ENSSSCG00000025114	Upregulated	74979	5	-	15592665	15644723	TCONS_00163960	27	3959	XLOC_044472	FMNL3	formin like 3 [Source:VGNC Symbol;Acc:VGNC:88169]
ENSSSCG00000025114	Upregulated	74980	5	-	15592665	15646013	TCONS_00163961	27	4243	XLOC_044472	FMNL3	formin like 3 [Source:VGNC Symbol;Acc:VGNC:88169]
ENSSSCG00000025114	Upregulated	74981	5	-	15592665	15646046	TCONS_00163962	27	4269	XLOC_044472	FMNL3	formin like 3 [Source:VGNC Symbol;Acc:VGNC:88169]
ENSSSCG00000025114	Upregulated	74982	5	-	15592665	15646046	TCONS_00163963	26	4126	XLOC_044472	FMNL3	formin like 3 [Source:VGNC Symbol;Acc:VGNC:88169]
ENSSSCG00000025114	Upregulated	74983	5	-	15592665	15646046	TCONS_00163964	26	4123	XLOC_044472	FMNL3	formin like 3 [Source:VGNC Symbol;Acc:VGNC:88169]
ENSSSCG00000025114	Upregulated	74984	5	-	15592665	15646046	TCONS_00163965	27	4279	XLOC_044472	FMNL3	formin like 3 [Source:VGNC Symbol;Acc:VGNC:88169]
ENSSSCG00000025114	Upregulated	74985	5	-	15592665	15646046	TCONS_00163966	26	4162	XLOC_044472	FMNL3	formin like 3 [Source:VGNC Symbol;Acc:VGNC:88169]
ENSSSCG00000025114	Upregulated	74986	5	-	15592666	15646046	TCONS_00163967	25	4008	XLOC_044472	FMNL3	formin like 3 [Source:VGNC Symbol;Acc:VGNC:88169]
ENSSSCG00000025114	Upregulated	74987	5	+	15592674	15631901	TCONS_00157939	25	4297	XLOC_042831	FMNL3	formin like 3 [Source:VGNC Symbol;Acc:VGNC:88169]
ENSSSCG00000025114	Upregulated	74988	5	+	15592674	15646008	TCONS_00157940	25	4533	XLOC_042831	FMNL3	formin like 3 [Source:VGNC Symbol;Acc:VGNC:88169]
ENSSSCG00000025114	Upregulated	74989	5	-	15592818	15646034	TCONS_00163968	26	3987	XLOC_044472	FMNL3	formin like 3 [Source:VGNC Symbol;Acc:VGNC:88169]
ENSSSCG00000011397	Upregulated	169444	13	-	32681471	32699832	TCONS_00057164	18	2225	XLOC_015732	SLC38A3	solute carrier family 38 member 3 [Source:VGNC Symbol;Acc:VGNC:93095]
ENSSSCG00000011397	Upregulated	169446	13	+	32683191	32704535	TCONS_00048430	18	5277	XLOC_013408	SLC38A3	solute carrier family 38 member 3 [Source:VGNC Symbol;Acc:VGNC:93095]
ENSSSCG00000011397	Upregulated	169447	13	-	32684779	32699514	TCONS_00057165	15	2036	XLOC_015732	SLC38A3	solute carrier family 38 member 3 [Source:VGNC Symbol;Acc:VGNC:93095]
ENSSSCG00000011397	Upregulated	169448	13	-	32684779	32699734	TCONS_00057166	16	3038	XLOC_015732	SLC38A3	solute carrier family 38 member 3 [Source:VGNC Symbol;Acc:VGNC:93095]
ENSSSCG00000011397	Upregulated	169449	13	-	32684779	32699744	TCONS_00057167	16	2363	XLOC_015732	SLC38A3	solute carrier family 38 member 3 [Source:VGNC Symbol;Acc:VGNC:93095]
ENSSSCG00000011397	Upregulated	169450	13	-	32684779	32699998	TCONS_00057168	15	3525	XLOC_015732	SLC38A3	solute carrier family 38 member 3 [Source:VGNC Symbol;Acc:VGNC:93095]
ENSSSCG00000011397	Upregulated	169451	13	-	32684779	32700036	TCONS_00057169	17	2460	XLOC_015732	SLC38A3	solute carrier family 38 member 3 [Source:VGNC Symbol;Acc:VGNC:93095]
ENSSSCG00000011397	Upregulated	169452	13	-	32684779	32712302	TCONS_00057170	17	1815	XLOC_015732	SLC38A3	solute carrier family 38 member 3 [Source:VGNC Symbol;Acc:VGNC:93095]
ENSSSCG00000011397	Upregulated	169453	13	+	32684786	32698835	TCONS_00048431	16	1699	XLOC_013408	SLC38A3	solute carrier family 38 member 3 [Source:VGNC Symbol;Acc:VGNC:93095]
ENSSSCG00000011397	Upregulated	169454	13	+	32684786	32699117	TCONS_00048432	15	1629	XLOC_013408	SLC38A3	solute carrier family 38 member 3 [Source:VGNC Symbol;Acc:VGNC:93095]
ENSSSCG00000011397	Upregulated	169455	13	+	32684786	32699803	TCONS_00048433	17	2520	XLOC_013408	SLC38A3	solute carrier family 38 member 3 [Source:VGNC Symbol;Acc:VGNC:93095]
ENSSSCG00000011397	Upregulated	169456	13	+	32684786	32704535	TCONS_00048434	18	5134	XLOC_013408	SLC38A3	solute carrier family 38 member 3 [Source:VGNC Symbol;Acc:VGNC:93095]
ENSSSCG00000011397	Upregulated	169457	13	+	32684786	32704688	TCONS_00048435	19	5446	XLOC_013408	SLC38A3	solute carrier family 38 member 3 [Source:VGNC Symbol;Acc:VGNC:93095]
ENSSSCG00000011397	Upregulated	169458	13	+	32684786	32704688	TCONS_00048436	17	6265	XLOC_013408	SLC38A3	solute carrier family 38 member 3 [Source:VGNC Symbol;Acc:VGNC:93095]
ENSSSCG00000011397	Upregulated	169459	13	+	32684786	32704688	TCONS_00048437	19	5388	XLOC_013408	SLC38A3	solute carrier family 38 member 3 [Source:VGNC Symbol;Acc:VGNC:93095]
ENSSSCG00000011397	Upregulated	169460	13	+	32684786	32704688	TCONS_00048438	17	5183	XLOC_013408	SLC38A3	solute carrier family 38 member 3 [Source:VGNC Symbol;Acc:VGNC:93095]
ENSSSCG00000011397	Upregulated	169462	13	-	32691310	32699893	TCONS_00057171	15	3121	XLOC_015732	SLC38A3	solute carrier family 38 member 3 [Source:VGNC Symbol;Acc:VGNC:93095]
ENSSSCG00000011397	Upregulated	169463	13	+	32691422	32699834	TCONS_00048440	16	2508	XLOC_013408	SLC38A3	solute carrier family 38 member 3 [Source:VGNC Symbol;Acc:VGNC:93095]
ENSSSCG00000011397	Upregulated	169464	13	+	32691422	32704688	TCONS_00048441	18	5345	XLOC_013408	SLC38A3	solute carrier family 38 member 3 [Source:VGNC Symbol;Acc:VGNC:93095]
ENSSSCG00000021026	Upregulated	95307	6	+	74434050	74486781	TCONS_00174157	4	2037	XLOC_047232	TMEM51	transmembrane protein 51 [Source:VGNC Symbol;Acc:VGNC:94187]
ENSSSCG00000021026	Upregulated	95308	6	+	74434050	74486783	TCONS_00174158	4	2029	XLOC_047232	TMEM51	transmembrane protein 51 [Source:VGNC Symbol;Acc:VGNC:94187]
ENSSSCG00000021026	Upregulated	95309	6	-	74434260	74486866	TCONS_00184820	4	1912	XLOC_050019	TMEM51	transmembrane protein 51 [Source:VGNC Symbol;Acc:VGNC:94187]
ENSSSCG00000021026	Upregulated	95310	6	-	74434896	74486842	TCONS_00184821	4	1868	XLOC_050019	TMEM51	transmembrane protein 51 [Source:VGNC Symbol;Acc:VGNC:94187]
ENSSSCG00000021026	Upregulated	95311	6	-	74434896	74486998	TCONS_00184822	4	2077	XLOC_050019	TMEM51	transmembrane protein 51 [Source:VGNC Symbol;Acc:VGNC:94187]
ENSSSCG00000021026	Upregulated	95312	6	-	74483389	74486786	TCONS_00184823	2	1187	XLOC_050019	TMEM51	transmembrane protein 51 [Source:VGNC Symbol;Acc:VGNC:94187]
ENSSSCG00000003482	Upregulated	95736	6	-	75874211	75901023	TCONS_00185032	12	1423	XLOC_050059	PADI3	peptidyl arginine deiminase 3 [Source:VGNC Symbol;Acc:VGNC:91147]
ENSSSCG00000003482	Upregulated	95737	6	-	75874211	75915352	TCONS_00185033	17	7842	XLOC_050059	PADI3	peptidyl arginine deiminase 3 [Source:VGNC Symbol;Acc:VGNC:91147]
ENSSSCG00000003482	Upregulated	95738	6	-	75874211	75915352	TCONS_00185034	18	8631	XLOC_050059	PADI3	peptidyl arginine deiminase 3 [Source:VGNC Symbol;Acc:VGNC:91147]
ENSSSCG00000003482	Upregulated	95739	6	-	75874211	75968619	TCONS_00185035	18	4048	XLOC_050059	PADI3	peptidyl arginine deiminase 3 [Source:VGNC Symbol;Acc:VGNC:91147]
ENSSSCG00000003482	Upregulated	95740	6	+	75874213	75908508	TCONS_00174374	16	2029	XLOC_047266	PADI3	peptidyl arginine deiminase 3 [Source:VGNC Symbol;Acc:VGNC:91147]
ENSSSCG00000003482	Upregulated	95741	6	+	75874213	75915508	TCONS_00174375	16	8677	XLOC_047266	PADI3	peptidyl arginine deiminase 3 [Source:VGNC Symbol;Acc:VGNC:91147]
ENSSSCG00000003482	Upregulated	95742	6	+	75874213	75915508	TCONS_00174376	18	8771	XLOC_047266	PADI3	peptidyl arginine deiminase 3 [Source:VGNC Symbol;Acc:VGNC:91147]
ENSSSCG00000003482	Upregulated	95743	6	+	75874213	75915508	TCONS_00174377	17	7833	XLOC_047266	PADI3	peptidyl arginine deiminase 3 [Source:VGNC Symbol;Acc:VGNC:91147]
ENSSSCG00000003482	Upregulated	95744	6	-	75884344	75914274	TCONS_00185036	16	6503	XLOC_050059	PADI3	peptidyl arginine deiminase 3 [Source:VGNC Symbol;Acc:VGNC:91147]
ENSSSCG00000003482	Upregulated	95746	6	+	75906583	75915508	TCONS_00174378	3	6198	XLOC_047266	PADI3	peptidyl arginine deiminase 3 [Source:VGNC Symbol;Acc:VGNC:91147]
ENSSSCG00000009580	Upregulated	183028	14	+	517241	675223	TCONS_00063922	2	4783	XLOC_017630	S1PR3	sphingosine-1-phosphate receptor 3 [Source:VGNC Symbol;Acc:VGNC:92553]
ENSSSCG00000009580	Upregulated	183030	14	-	656367	672058	TCONS_00071462	3	6290	XLOC_019454	S1PR3	sphingosine-1-phosphate receptor 3 [Source:VGNC Symbol;Acc:VGNC:92553]
ENSSSCG00000009580	Upregulated	183031	14	-	656367	672385	TCONS_00071463	3	6490	XLOC_019454	S1PR3	sphingosine-1-phosphate receptor 3 [Source:VGNC Symbol;Acc:VGNC:92553]
ENSSSCG00000009580	Upregulated	183035	14	+	656374	675223	TCONS_00063924	3	9321	XLOC_017630	S1PR3	sphingosine-1-phosphate receptor 3 [Source:VGNC Symbol;Acc:VGNC:92553]
ENSSSCG00000009580	Upregulated	183036	14	+	659309	671709	TCONS_00063925	2	3770	XLOC_017630	S1PR3	sphingosine-1-phosphate receptor 3 [Source:VGNC Symbol;Acc:VGNC:92553]
ENSSSCG00000009580	Upregulated	183037	14	+	659309	675223	TCONS_00063926	2	7284	XLOC_017630	S1PR3	sphingosine-1-phosphate receptor 3 [Source:VGNC Symbol;Acc:VGNC:92553]
ENSSSCG00000002469	Upregulated	119005	7	+	115304500	115349182	TCONS_00196634	7	3620	XLOC_053103	OTUB2	OTU deubiquitinase, ubiquitin aldehyde binding 2 [Source:VGNC Symbol;Acc:VGNC:91098]
ENSSSCG00000002469	Upregulated	119006	7	+	115304526	115349182	TCONS_00196635	7	3516	XLOC_053103	OTUB2	OTU deubiquitinase, ubiquitin aldehyde binding 2 [Source:VGNC Symbol;Acc:VGNC:91098]
ENSSSCG00000002469	Upregulated	119007	7	+	115304528	115352121	TCONS_00196636	16	8600	XLOC_053103	OTUB2	OTU deubiquitinase, ubiquitin aldehyde binding 2 [Source:VGNC Symbol;Acc:VGNC:91098]
ENSSSCG00000002469	Upregulated	119008	7	+	115304528	115399556	TCONS_00196637	7	3593	XLOC_053103	OTUB2	OTU deubiquitinase, ubiquitin aldehyde binding 2 [Source:VGNC Symbol;Acc:VGNC:91098]
ENSSSCG00000002469	Upregulated	119009	7	+	115304653	115347570	TCONS_00196638	14	8564	XLOC_053103	OTUB2	OTU deubiquitinase, ubiquitin aldehyde binding 2 [Source:VGNC Symbol;Acc:VGNC:91098]
ENSSSCG00000002469	Upregulated	119010	7	+	115304653	115348206	TCONS_00196639	14	8068	XLOC_053103	OTUB2	OTU deubiquitinase, ubiquitin aldehyde binding 2 [Source:VGNC Symbol;Acc:VGNC:91098]
ENSSSCG00000002469	Upregulated	119011	7	+	115304653	115349182	TCONS_00196640	8	2609	XLOC_053103	OTUB2	OTU deubiquitinase, ubiquitin aldehyde binding 2 [Source:VGNC Symbol;Acc:VGNC:91098]
ENSSSCG00000002469	Upregulated	119012	7	+	115304653	115352121	TCONS_00196641	15	8603	XLOC_053103	OTUB2	OTU deubiquitinase, ubiquitin aldehyde binding 2 [Source:VGNC Symbol;Acc:VGNC:91098]
ENSSSCG00000002469	Upregulated	119013	7	+	115304653	115352121	TCONS_00196642	14	8494	XLOC_053103	OTUB2	OTU deubiquitinase, ubiquitin aldehyde binding 2 [Source:VGNC Symbol;Acc:VGNC:91098]
ENSSSCG00000002469	Upregulated	119014	7	+	115304686	115348206	TCONS_00196643	14	8580	XLOC_053103	OTUB2	OTU deubiquitinase, ubiquitin aldehyde binding 2 [Source:VGNC Symbol;Acc:VGNC:91098]
ENSSSCG00000002469	Upregulated	119015	7	+	115304870	115327056	TCONS_00196644	7	3543	XLOC_053103	OTUB2	OTU deubiquitinase, ubiquitin aldehyde binding 2 [Source:VGNC Symbol;Acc:VGNC:91098]
ENSSSCG00000002469	Upregulated	119022	7	+	115321033	115399556	TCONS_00196645	6	2067	XLOC_053103	OTUB2	OTU deubiquitinase, ubiquitin aldehyde binding 2 [Source:VGNC Symbol;Acc:VGNC:91098]
ENSSSCG00000002469	Upregulated	119023	7	+	115322024	115349182	TCONS_00196646	5	1981	XLOC_053103	OTUB2	OTU deubiquitinase, ubiquitin aldehyde binding 2 [Source:VGNC Symbol;Acc:VGNC:91098]
ENSSSCG00000006609	Upregulated	67579	4	-	97177300	97182713	TCONS_00154171	3	4021	XLOC_041874	TCHHL1	trichohyalin like 1 [Source:VGNC Symbol;Acc:VGNC:93826]
ENSSSCG00000006609	Upregulated	67580	4	+	97177433	97214025	TCONS_00147593	5	3704	XLOC_040088	TCHHL1	trichohyalin like 1 [Source:VGNC Symbol;Acc:VGNC:93826]
ENSSSCG00000006609	Upregulated	67581	4	+	97178373	97181539	TCONS_00147594	2	2664	XLOC_040088	TCHHL1	trichohyalin like 1 [Source:VGNC Symbol;Acc:VGNC:93826]
ENSSSCG00000039030	Upregulated	158163	12	+	21403241	21403970	TCONS_00036795	2	375	XLOC_010572	ENSSSCG00000039030
ENSSSCG00000039030	Upregulated	158164	12	-	21403901	21404341	TCONS_00042814	1	441	XLOC_012030	ENSSSCG00000039030
ENSSSCG00000021220	Upregulated	234727	AEMK02000452.1	-	1894441	2149610	TCONS_00228229	2	733	XLOC_062599	CKB	creatine kinase B [Source:VGNC Symbol;Acc:VGNC:86718]
ENSSSCG00000021220	Upregulated	234805	AEMK02000452.1	-	2070843	2073522	TCONS_00228271	7	1216	XLOC_062608	CKB	creatine kinase B [Source:VGNC Symbol;Acc:VGNC:86718]
ENSSSCG00000021220	Upregulated	234806	AEMK02000452.1	-	2070843	2074141	TCONS_00228272	8	1664	XLOC_062608	CKB	creatine kinase B [Source:VGNC Symbol;Acc:VGNC:86718]
ENSSSCG00000021220	Upregulated	234807	AEMK02000452.1	-	2070843	2074141	TCONS_00228273	8	1457	XLOC_062608	CKB	creatine kinase B [Source:VGNC Symbol;Acc:VGNC:86718]
ENSSSCG00000021220	Upregulated	234808	AEMK02000452.1	-	2070843	2074141	TCONS_00228274	8	1664	XLOC_062608	CKB	creatine kinase B [Source:VGNC Symbol;Acc:VGNC:86718]
ENSSSCG00000021220	Upregulated	234809	AEMK02000452.1	-	2070843	2074141	TCONS_00228275	8	1457	XLOC_062608	CKB	creatine kinase B [Source:VGNC Symbol;Acc:VGNC:86718]
ENSSSCG00000021220	Upregulated	234810	AEMK02000452.1	-	2070847	2074899	TCONS_00228276	8	1648	XLOC_062608	CKB	creatine kinase B [Source:VGNC Symbol;Acc:VGNC:86718]
ENSSSCG00000021220	Upregulated	234811	AEMK02000452.1	-	2070848	2074141	TCONS_00228277	8	1659	XLOC_062608	CKB	creatine kinase B [Source:VGNC Symbol;Acc:VGNC:86718]
ENSSSCG00000034500	Upregulated	211149	16	-	49765159	49767928	TCONS_00093034	3	2433	XLOC_025449	MSX2	msh homeobox 2 [Source:VGNC Symbol;Acc:VGNC:90432]
ENSSSCG00000034500	Upregulated	211150	16	-	49765159	49768868	TCONS_00093035	2	2182	XLOC_025449	MSX2	msh homeobox 2 [Source:VGNC Symbol;Acc:VGNC:90432]
ENSSSCG00000034500	Upregulated	211151	16	-	49765159	49769629	TCONS_00093036	2	2216	XLOC_025449	MSX2	msh homeobox 2 [Source:VGNC Symbol;Acc:VGNC:90432]
ENSSSCG00000034500	Upregulated	211152	16	-	49765159	49771704	TCONS_00093037	2	2670	XLOC_025449	MSX2	msh homeobox 2 [Source:VGNC Symbol;Acc:VGNC:90432]
ENSSSCG00000034500	Upregulated	211153	16	-	49766897	49771634	TCONS_00093038	2	862	XLOC_025449	MSX2	msh homeobox 2 [Source:VGNC Symbol;Acc:VGNC:90432]
ENSSSCG00000033887	Upregulated	96127	6	+	78276839	78282479	TCONS_00174571	4	2833	XLOC_047303	PLA2G2E	phospholipase A2 group IIE [Source:VGNC Symbol;Acc:VGNC:91492]
ENSSSCG00000033887	Upregulated	96128	6	-	78277225	78282259	TCONS_00185224	4	2227	XLOC_050093	PLA2G2E	phospholipase A2 group IIE [Source:VGNC Symbol;Acc:VGNC:91492]
ENSSSCG00000033887	Upregulated	96129	6	-	78278990	78282259	TCONS_00185225	4	462	XLOC_050093	PLA2G2E	phospholipase A2 group IIE [Source:VGNC Symbol;Acc:VGNC:91492]
ENSSSCG00000031011	Upregulated	232456	X	+	110159912	110170350	TCONS_00233952	3	1219	XLOC_064692	CCDC160	coiled-coil domain containing 160 [Source:VGNC Symbol;Acc:VGNC:86269]
ENSSSCG00000031011	Upregulated	232458	X	+	110161202	110170354	TCONS_00233953	2	1048	XLOC_064692	CCDC160	coiled-coil domain containing 160 [Source:VGNC Symbol;Acc:VGNC:86269]
ENSSSCG00000009764	Upregulated	185657	14	+	29068641	29094697	TCONS_00065282	4	1713	XLOC_017978	CCDC92	coiled-coil domain containing 92 [Source:VGNC Symbol;Acc:VGNC:86330]
ENSSSCG00000009764	Upregulated	185658	14	+	29068722	29094697	TCONS_00065283	6	2107	XLOC_017978	CCDC92	coiled-coil domain containing 92 [Source:VGNC Symbol;Acc:VGNC:86330]
ENSSSCG00000009764	Upregulated	185659	14	-	29069026	29094770	TCONS_00072728	4	1740	XLOC_019805	CCDC92	coiled-coil domain containing 92 [Source:VGNC Symbol;Acc:VGNC:86330]
ENSSSCG00000009764	Upregulated	185660	14	+	29069042	29094697	TCONS_00065284	4	1651	XLOC_017978	CCDC92	coiled-coil domain containing 92 [Source:VGNC Symbol;Acc:VGNC:86330]
ENSSSCG00000009764	Upregulated	185661	14	+	29069045	29094697	TCONS_00065285	5	1975	XLOC_017978	CCDC92	coiled-coil domain containing 92 [Source:VGNC Symbol;Acc:VGNC:86330]
ENSSSCG00000009764	Upregulated	185662	14	+	29069046	29094613	TCONS_00065286	5	2516	XLOC_017978	CCDC92	coiled-coil domain containing 92 [Source:VGNC Symbol;Acc:VGNC:86330]
ENSSSCG00000009764	Upregulated	185663	14	+	29069046	29094697	TCONS_00065287	4	1901	XLOC_017978	CCDC92	coiled-coil domain containing 92 [Source:VGNC Symbol;Acc:VGNC:86330]
ENSSSCG00000009764	Upregulated	185664	14	+	29069046	29094697	TCONS_00065288	4	2273	XLOC_017978	CCDC92	coiled-coil domain containing 92 [Source:VGNC Symbol;Acc:VGNC:86330]
ENSSSCG00000009764	Upregulated	185665	14	+	29069046	29094697	TCONS_00065289	4	1901	XLOC_017978	CCDC92	coiled-coil domain containing 92 [Source:VGNC Symbol;Acc:VGNC:86330]
ENSSSCG00000009764	Upregulated	185666	14	-	29069091	29094770	TCONS_00072729	4	2301	XLOC_019805	CCDC92	coiled-coil domain containing 92 [Source:VGNC Symbol;Acc:VGNC:86330]
ENSSSCG00000009764	Upregulated	185667	14	-	29069091	29094770	TCONS_00072730	5	2628	XLOC_019805	CCDC92	coiled-coil domain containing 92 [Source:VGNC Symbol;Acc:VGNC:86330]
ENSSSCG00000009764	Upregulated	185668	14	+	29069301	29094693	TCONS_00065290	6	2489	XLOC_017978	CCDC92	coiled-coil domain containing 92 [Source:VGNC Symbol;Acc:VGNC:86330]
ENSSSCG00000009764	Upregulated	185669	14	+	29071756	29094697	TCONS_00065291	4	1625	XLOC_017978	CCDC92	coiled-coil domain containing 92 [Source:VGNC Symbol;Acc:VGNC:86330]
ENSSSCG00000009764	Upregulated	185670	14	-	29079315	29094770	TCONS_00072731	4	1790	XLOC_019805	CCDC92	coiled-coil domain containing 92 [Source:VGNC Symbol;Acc:VGNC:86330]
ENSSSCG00000009764	Upregulated	185671	14	+	29079436	29094697	TCONS_00065292	4	1616	XLOC_017978	CCDC92	coiled-coil domain containing 92 [Source:VGNC Symbol;Acc:VGNC:86330]
ENSSSCG00000007738	Upregulated	44861	3	+	16637481	16639377	TCONS_00127994	3	1579	XLOC_034895	ENSSSCG00000007738	argininosuccinate lyase [Source:VGNC Symbol;Acc:VGNC:100380]
ENSSSCG00000007738	Upregulated	44862	3	+	16637481	16646869	TCONS_00127995	17	1909	XLOC_034895	ENSSSCG00000007738	argininosuccinate lyase [Source:VGNC Symbol;Acc:VGNC:100380]
ENSSSCG00000007738	Upregulated	44863	3	+	16637481	16646869	TCONS_00127996	17	1597	XLOC_034895	ENSSSCG00000007738	argininosuccinate lyase [Source:VGNC Symbol;Acc:VGNC:100380]
ENSSSCG00000007738	Upregulated	44864	3	+	16637481	16646869	TCONS_00127997	16	1540	XLOC_034895	ENSSSCG00000007738	argininosuccinate lyase [Source:VGNC Symbol;Acc:VGNC:100380]
ENSSSCG00000007738	Upregulated	44865	3	+	16637481	16646869	TCONS_00127998	16	1537	XLOC_034895	ENSSSCG00000007738	argininosuccinate lyase [Source:VGNC Symbol;Acc:VGNC:100380]
ENSSSCG00000007738	Upregulated	44866	3	+	16637481	16646869	TCONS_00127999	16	1519	XLOC_034895	ENSSSCG00000007738	argininosuccinate lyase [Source:VGNC Symbol;Acc:VGNC:100380]
ENSSSCG00000007738	Upregulated	44867	3	-	16637503	16646236	TCONS_00136067	15	1250	XLOC_037026	ENSSSCG00000007738	argininosuccinate lyase [Source:VGNC Symbol;Acc:VGNC:100380]
ENSSSCG00000007738	Upregulated	44868	3	-	16637503	16646662	TCONS_00136068	16	1316	XLOC_037026	ENSSSCG00000007738	argininosuccinate lyase [Source:VGNC Symbol;Acc:VGNC:100380]
ENSSSCG00000007738	Upregulated	44869	3	-	16637503	16646668	TCONS_00136069	15	1314	XLOC_037026	ENSSSCG00000007738	argininosuccinate lyase [Source:VGNC Symbol;Acc:VGNC:100380]
ENSSSCG00000007738	Upregulated	44870	3	-	16637503	16646669	TCONS_00136070	16	1292	XLOC_037026	ENSSSCG00000007738	argininosuccinate lyase [Source:VGNC Symbol;Acc:VGNC:100380]
ENSSSCG00000007738	Upregulated	44871	3	-	16637503	16646832	TCONS_00136071	17	2518	XLOC_037026	ENSSSCG00000007738	argininosuccinate lyase [Source:VGNC Symbol;Acc:VGNC:100380]
ENSSSCG00000007738	Upregulated	44872	3	-	16637503	16646836	TCONS_00136072	16	3064	XLOC_037026	ENSSSCG00000007738	argininosuccinate lyase [Source:VGNC Symbol;Acc:VGNC:100380]
ENSSSCG00000007738	Upregulated	44873	3	-	16637503	16646854	TCONS_00136073	17	1872	XLOC_037026	ENSSSCG00000007738	argininosuccinate lyase [Source:VGNC Symbol;Acc:VGNC:100380]
ENSSSCG00000007738	Upregulated	44874	3	-	16637503	16646858	TCONS_00136074	16	1579	XLOC_037026	ENSSSCG00000007738	argininosuccinate lyase [Source:VGNC Symbol;Acc:VGNC:100380]
ENSSSCG00000007738	Upregulated	44875	3	-	16637503	16646858	TCONS_00136075	16	1511	XLOC_037026	ENSSSCG00000007738	argininosuccinate lyase [Source:VGNC Symbol;Acc:VGNC:100380]
ENSSSCG00000007738	Upregulated	44876	3	-	16637503	16646860	TCONS_00136076	16	2928	XLOC_037026	ENSSSCG00000007738	argininosuccinate lyase [Source:VGNC Symbol;Acc:VGNC:100380]
ENSSSCG00000007738	Upregulated	44877	3	-	16637503	16646862	TCONS_00136077	17	1963	XLOC_037026	ENSSSCG00000007738	argininosuccinate lyase [Source:VGNC Symbol;Acc:VGNC:100380]
ENSSSCG00000007738	Upregulated	44878	3	-	16637503	16646867	TCONS_00136078	16	1832	XLOC_037026	ENSSSCG00000007738	argininosuccinate lyase [Source:VGNC Symbol;Acc:VGNC:100380]
ENSSSCG00000007738	Upregulated	44879	3	-	16637503	16647267	TCONS_00136079	17	1973	XLOC_037026	ENSSSCG00000007738	argininosuccinate lyase [Source:VGNC Symbol;Acc:VGNC:100380]
ENSSSCG00000007738	Upregulated	44880	3	-	16637503	16647267	TCONS_00136080	17	3326	XLOC_037026	ENSSSCG00000007738	argininosuccinate lyase [Source:VGNC Symbol;Acc:VGNC:100380]
ENSSSCG00000007738	Upregulated	44881	3	+	16639495	16646869	TCONS_00128000	14	2651	XLOC_034895	ENSSSCG00000007738	argininosuccinate lyase [Source:VGNC Symbol;Acc:VGNC:100380]
ENSSSCG00000007738	Upregulated	44882	3	+	16639512	16646869	TCONS_00128001	15	2712	XLOC_034895	ENSSSCG00000007738	argininosuccinate lyase [Source:VGNC Symbol;Acc:VGNC:100380]
ENSSSCG00000007738	Upregulated	44883	3	+	16639607	16646869	TCONS_00128002	14	2564	XLOC_034895	ENSSSCG00000007738	argininosuccinate lyase [Source:VGNC Symbol;Acc:VGNC:100380]
ENSSSCG00000007738	Upregulated	44884	3	+	16640513	16646869	TCONS_00128003	15	1360	XLOC_034895	ENSSSCG00000007738	argininosuccinate lyase [Source:VGNC Symbol;Acc:VGNC:100380]
ENSSSCG00000007738	Upregulated	44885	3	+	16640513	16646869	TCONS_00128004	16	1438	XLOC_034895	ENSSSCG00000007738	argininosuccinate lyase [Source:VGNC Symbol;Acc:VGNC:100380]
ENSSSCG00000035445	Upregulated	161972	12	-	45178126	45186677	TCONS_00044738	11	2780	XLOC_012521	SEZ6	seizure related 6 homolog [Source:VGNC Symbol;Acc:VGNC:92767]
ENSSSCG00000035445	Upregulated	161973	12	-	45178126	45190118	TCONS_00044739	13	3078	XLOC_012521	SEZ6	seizure related 6 homolog [Source:VGNC Symbol;Acc:VGNC:92767]
ENSSSCG00000035445	Upregulated	161974	12	-	45178126	45190234	TCONS_00044740	13	2924	XLOC_012521	SEZ6	seizure related 6 homolog [Source:VGNC Symbol;Acc:VGNC:92767]
ENSSSCG00000035445	Upregulated	161975	12	-	45178126	45191262	TCONS_00044741	13	3113	XLOC_012521	SEZ6	seizure related 6 homolog [Source:VGNC Symbol;Acc:VGNC:92767]
ENSSSCG00000035445	Upregulated	161976	12	-	45178126	45191308	TCONS_00044742	13	3037	XLOC_012521	SEZ6	seizure related 6 homolog [Source:VGNC Symbol;Acc:VGNC:92767]
ENSSSCG00000035445	Upregulated	161977	12	-	45178126	45191332	TCONS_00044743	13	2948	XLOC_012521	SEZ6	seizure related 6 homolog [Source:VGNC Symbol;Acc:VGNC:92767]
ENSSSCG00000035445	Upregulated	161978	12	-	45178126	45191344	TCONS_00044744	13	3111	XLOC_012521	SEZ6	seizure related 6 homolog [Source:VGNC Symbol;Acc:VGNC:92767]
ENSSSCG00000035445	Upregulated	161979	12	-	45178126	45279724	TCONS_00044745	17	4039	XLOC_012521	SEZ6	seizure related 6 homolog [Source:VGNC Symbol;Acc:VGNC:92767]
ENSSSCG00000035445	Upregulated	161980	12	-	45178126	45279724	TCONS_00044746	19	4493	XLOC_012521	SEZ6	seizure related 6 homolog [Source:VGNC Symbol;Acc:VGNC:92767]
ENSSSCG00000035445	Upregulated	161981	12	-	45178126	45279724	TCONS_00044747	18	4460	XLOC_012521	SEZ6	seizure related 6 homolog [Source:VGNC Symbol;Acc:VGNC:92767]
ENSSSCG00000035445	Upregulated	161982	12	-	45178126	45279724	TCONS_00044748	19	4447	XLOC_012521	SEZ6	seizure related 6 homolog [Source:VGNC Symbol;Acc:VGNC:92767]
ENSSSCG00000035445	Upregulated	161983	12	-	45178126	45279724	TCONS_00044749	20	4486	XLOC_012521	SEZ6	seizure related 6 homolog [Source:VGNC Symbol;Acc:VGNC:92767]
ENSSSCG00000035445	Upregulated	161984	12	-	45178126	45279724	TCONS_00044750	20	4364	XLOC_012521	SEZ6	seizure related 6 homolog [Source:VGNC Symbol;Acc:VGNC:92767]
ENSSSCG00000035445	Upregulated	161985	12	-	45178126	45279724	TCONS_00044751	19	4499	XLOC_012521	SEZ6	seizure related 6 homolog [Source:VGNC Symbol;Acc:VGNC:92767]
ENSSSCG00000035445	Upregulated	161986	12	-	45178126	45279724	TCONS_00044752	18	4492	XLOC_012521	SEZ6	seizure related 6 homolog [Source:VGNC Symbol;Acc:VGNC:92767]
ENSSSCG00000035445	Upregulated	161987	12	-	45178126	45279724	TCONS_00044753	17	4256	XLOC_012521	SEZ6	seizure related 6 homolog [Source:VGNC Symbol;Acc:VGNC:92767]
ENSSSCG00000035445	Upregulated	161988	12	-	45178126	45279724	TCONS_00044754	18	4454	XLOC_012521	SEZ6	seizure related 6 homolog [Source:VGNC Symbol;Acc:VGNC:92767]
ENSSSCG00000035445	Upregulated	161989	12	-	45178126	45279724	TCONS_00044755	18	4454	XLOC_012521	SEZ6	seizure related 6 homolog [Source:VGNC Symbol;Acc:VGNC:92767]
ENSSSCG00000035445	Upregulated	161990	12	-	45178126	45279724	TCONS_00044756	19	4453	XLOC_012521	SEZ6	seizure related 6 homolog [Source:VGNC Symbol;Acc:VGNC:92767]
ENSSSCG00000035445	Upregulated	161991	12	-	45178126	45279724	TCONS_00044757	18	4225	XLOC_012521	SEZ6	seizure related 6 homolog [Source:VGNC Symbol;Acc:VGNC:92767]
ENSSSCG00000035445	Upregulated	161992	12	-	45178126	45279724	TCONS_00044758	20	4492	XLOC_012521	SEZ6	seizure related 6 homolog [Source:VGNC Symbol;Acc:VGNC:92767]
ENSSSCG00000035445	Upregulated	161993	12	-	45178126	45279724	TCONS_00044759	18	4370	XLOC_012521	SEZ6	seizure related 6 homolog [Source:VGNC Symbol;Acc:VGNC:92767]
ENSSSCG00000035445	Upregulated	161994	12	-	45178126	45279729	TCONS_00044760	20	4420	XLOC_012521	SEZ6	seizure related 6 homolog [Source:VGNC Symbol;Acc:VGNC:92767]
ENSSSCG00000035445	Upregulated	161995	12	-	45178126	45328708	TCONS_00044761	16	4029	XLOC_012521	SEZ6	seizure related 6 homolog [Source:VGNC Symbol;Acc:VGNC:92767]
ENSSSCG00000035445	Upregulated	161996	12	-	45178126	45328731	TCONS_00044762	17	4048	XLOC_012521	SEZ6	seizure related 6 homolog [Source:VGNC Symbol;Acc:VGNC:92767]
ENSSSCG00000035445	Upregulated	161997	12	-	45178126	45328739	TCONS_00044763	17	4138	XLOC_012521	SEZ6	seizure related 6 homolog [Source:VGNC Symbol;Acc:VGNC:92767]
ENSSSCG00000035445	Upregulated	161998	12	-	45178126	45328742	TCONS_00044764	16	3907	XLOC_012521	SEZ6	seizure related 6 homolog [Source:VGNC Symbol;Acc:VGNC:92767]
ENSSSCG00000035445	Upregulated	161999	12	-	45178126	45328788	TCONS_00044765	16	4226	XLOC_012521	SEZ6	seizure related 6 homolog [Source:VGNC Symbol;Acc:VGNC:92767]
ENSSSCG00000035445	Upregulated	162000	12	-	45178126	45354341	TCONS_00044766	5	1519	XLOC_012521	SEZ6	seizure related 6 homolog [Source:VGNC Symbol;Acc:VGNC:92767]
ENSSSCG00000035445	Upregulated	162001	12	+	45178219	45191355	TCONS_00038675	13	3113	XLOC_011032	SEZ6	seizure related 6 homolog [Source:VGNC Symbol;Acc:VGNC:92767]
ENSSSCG00000035445	Upregulated	162002	12	-	45178313	45279724	TCONS_00044767	18	4032	XLOC_012521	SEZ6	seizure related 6 homolog [Source:VGNC Symbol;Acc:VGNC:92767]
ENSSSCG00000035445	Upregulated	162003	12	-	45178313	45279724	TCONS_00044768	19	4260	XLOC_012521	SEZ6	seizure related 6 homolog [Source:VGNC Symbol;Acc:VGNC:92767]
ENSSSCG00000035445	Upregulated	162004	12	+	45178323	45191422	TCONS_00038676	12	3026	XLOC_011032	SEZ6	seizure related 6 homolog [Source:VGNC Symbol;Acc:VGNC:92767]
ENSSSCG00000035445	Upregulated	162005	12	+	45178323	45223771	TCONS_00038677	17	4079	XLOC_011032	SEZ6	seizure related 6 homolog [Source:VGNC Symbol;Acc:VGNC:92767]
ENSSSCG00000035445	Upregulated	162006	12	+	45178339	45179855	TCONS_00038678	3	1269	XLOC_011032	SEZ6	seizure related 6 homolog [Source:VGNC Symbol;Acc:VGNC:92767]
ENSSSCG00000035445	Upregulated	162007	12	+	45178339	45191355	TCONS_00038679	12	3245	XLOC_011032	SEZ6	seizure related 6 homolog [Source:VGNC Symbol;Acc:VGNC:92767]
ENSSSCG00000035445	Upregulated	162008	12	+	45178339	45192401	TCONS_00038680	14	3443	XLOC_011032	SEZ6	seizure related 6 homolog [Source:VGNC Symbol;Acc:VGNC:92767]
ENSSSCG00000035445	Upregulated	162009	12	+	45178339	45203118	TCONS_00038681	15	3957	XLOC_011032	SEZ6	seizure related 6 homolog [Source:VGNC Symbol;Acc:VGNC:92767]
ENSSSCG00000035445	Upregulated	162010	12	+	45178339	45223771	TCONS_00038682	15	4689	XLOC_011032	SEZ6	seizure related 6 homolog [Source:VGNC Symbol;Acc:VGNC:92767]
ENSSSCG00000035445	Upregulated	162011	12	+	45178339	45223771	TCONS_00038683	16	4315	XLOC_011032	SEZ6	seizure related 6 homolog [Source:VGNC Symbol;Acc:VGNC:92767]
ENSSSCG00000035445	Upregulated	162012	12	+	45178339	45223771	TCONS_00038684	15	4276	XLOC_011032	SEZ6	seizure related 6 homolog [Source:VGNC Symbol;Acc:VGNC:92767]
ENSSSCG00000042718	Upregulated	169441	13	+	32671418	32680152	TCONS_00048426	9	6169	XLOC_013406	GNAT1	G protein subunit alpha transducin 1 [Source:HGNC Symbol;Acc:HGNC:4393]
ENSSSCG00000042718	Upregulated	169442	13	+	32671432	32678394	TCONS_00048427	8	4770	XLOC_013406	GNAT1	G protein subunit alpha transducin 1 [Source:HGNC Symbol;Acc:HGNC:4393]
ENSSSCG00000042718	Upregulated	169443	13	+	32671554	32678392	TCONS_00048428	8	5573	XLOC_013406	GNAT1	G protein subunit alpha transducin 1 [Source:HGNC Symbol;Acc:HGNC:4393]
ENSSSCG00000033367	Upregulated	200352	15	-	47625937	47662629	TCONS_00085147	10	5181	XLOC_023108	PLEKHA2	pleckstrin homology domain containing A2 [Source:VGNC Symbol;Acc:VGNC:95611]
ENSSSCG00000033367	Upregulated	200353	15	-	47625937	47663130	TCONS_00085148	10	5132	XLOC_023108	PLEKHA2	pleckstrin homology domain containing A2 [Source:VGNC Symbol;Acc:VGNC:95611]
ENSSSCG00000033367	Upregulated	200354	15	-	47625937	47671045	TCONS_00085149	11	5194	XLOC_023108	PLEKHA2	pleckstrin homology domain containing A2 [Source:VGNC Symbol;Acc:VGNC:95611]
ENSSSCG00000033367	Upregulated	200355	15	-	47625937	47697178	TCONS_00085150	13	5595	XLOC_023108	PLEKHA2	pleckstrin homology domain containing A2 [Source:VGNC Symbol;Acc:VGNC:95611]
ENSSSCG00000033367	Upregulated	200356	15	-	47625937	47697178	TCONS_00085151	11	5448	XLOC_023108	PLEKHA2	pleckstrin homology domain containing A2 [Source:VGNC Symbol;Acc:VGNC:95611]
ENSSSCG00000033367	Upregulated	200357	15	-	47625937	47697178	TCONS_00085152	14	5637	XLOC_023108	PLEKHA2	pleckstrin homology domain containing A2 [Source:VGNC Symbol;Acc:VGNC:95611]
ENSSSCG00000033367	Upregulated	200358	15	-	47625937	47697178	TCONS_00085153	13	5595	XLOC_023108	PLEKHA2	pleckstrin homology domain containing A2 [Source:VGNC Symbol;Acc:VGNC:95611]
ENSSSCG00000033367	Upregulated	200359	15	-	47625937	47713346	TCONS_00085154	11	5370	XLOC_023108	PLEKHA2	pleckstrin homology domain containing A2 [Source:VGNC Symbol;Acc:VGNC:95611]
ENSSSCG00000033367	Upregulated	200360	15	-	47625937	47713346	TCONS_00085155	12	5419	XLOC_023108	PLEKHA2	pleckstrin homology domain containing A2 [Source:VGNC Symbol;Acc:VGNC:95611]
ENSSSCG00000033367	Upregulated	200361	15	-	47625937	47713346	TCONS_00085156	12	5419	XLOC_023108	PLEKHA2	pleckstrin homology domain containing A2 [Source:VGNC Symbol;Acc:VGNC:95611]
ENSSSCG00000033367	Upregulated	200362	15	-	47625937	47713346	TCONS_00085157	12	5419	XLOC_023108	PLEKHA2	pleckstrin homology domain containing A2 [Source:VGNC Symbol;Acc:VGNC:95611]
ENSSSCG00000033367	Upregulated	200364	15	+	47626088	47682580	TCONS_00080024	11	5159	XLOC_021646	PLEKHA2	pleckstrin homology domain containing A2 [Source:VGNC Symbol;Acc:VGNC:95611]
ENSSSCG00000033367	Upregulated	200365	15	-	47626109	47713346	TCONS_00085158	13	5289	XLOC_023108	PLEKHA2	pleckstrin homology domain containing A2 [Source:VGNC Symbol;Acc:VGNC:95611]
ENSSSCG00000033367	Upregulated	200367	15	+	47626146	47662582	TCONS_00080026	10	4925	XLOC_021646	PLEKHA2	pleckstrin homology domain containing A2 [Source:VGNC Symbol;Acc:VGNC:95611]
ENSSSCG00000033367	Upregulated	200368	15	+	47626146	47682580	TCONS_00080027	13	5008	XLOC_021646	PLEKHA2	pleckstrin homology domain containing A2 [Source:VGNC Symbol;Acc:VGNC:95611]
ENSSSCG00000033367	Upregulated	200371	15	-	47629950	47697178	TCONS_00085159	11	1435	XLOC_023108	PLEKHA2	pleckstrin homology domain containing A2 [Source:VGNC Symbol;Acc:VGNC:95611]
ENSSSCG00000033367	Upregulated	200372	15	-	47629950	47697178	TCONS_00085160	13	1582	XLOC_023108	PLEKHA2	pleckstrin homology domain containing A2 [Source:VGNC Symbol;Acc:VGNC:95611]
ENSSSCG00000034528	Upregulated	216189	17	-	33081795	33156495	TCONS_00099385	21	12513	XLOC_027280	TGM6	transglutaminase 6 [Source:VGNC Symbol;Acc:VGNC:95803]
ENSSSCG00000034528	Upregulated	216193	17	-	33096803	33109508	TCONS_00099386	3	9921	XLOC_027280	TGM6	transglutaminase 6 [Source:VGNC Symbol;Acc:VGNC:95803]
ENSSSCG00000034528	Upregulated	216194	17	-	33096803	33155166	TCONS_00099387	16	11696	XLOC_027280	TGM6	transglutaminase 6 [Source:VGNC Symbol;Acc:VGNC:95803]
ENSSSCG00000034528	Upregulated	216197	17	-	33099247	33155136	TCONS_00099390	12	11402	XLOC_027280	TGM6	transglutaminase 6 [Source:VGNC Symbol;Acc:VGNC:95803]
ENSSSCG00000034528	Upregulated	216198	17	-	33099247	33155155	TCONS_00099391	11	11218	XLOC_027280	TGM6	transglutaminase 6 [Source:VGNC Symbol;Acc:VGNC:95803]
ENSSSCG00000034528	Upregulated	216199	17	-	33099247	33155159	TCONS_00099392	13	11529	XLOC_027280	TGM6	transglutaminase 6 [Source:VGNC Symbol;Acc:VGNC:95803]
ENSSSCG00000034528	Upregulated	216200	17	-	33099247	33155162	TCONS_00099393	12	11432	XLOC_027280	TGM6	transglutaminase 6 [Source:VGNC Symbol;Acc:VGNC:95803]
ENSSSCG00000034528	Upregulated	216201	17	+	33099296	33155176	TCONS_00095591	11	11055	XLOC_026273	TGM6	transglutaminase 6 [Source:VGNC Symbol;Acc:VGNC:95803]
ENSSSCG00000034528	Upregulated	216202	17	+	33099334	33109556	TCONS_00095592	2	9530	XLOC_026273	TGM6	transglutaminase 6 [Source:VGNC Symbol;Acc:VGNC:95803]
ENSSSCG00000034528	Upregulated	216203	17	+	33099334	33138204	TCONS_00095593	10	10882	XLOC_026273	TGM6	transglutaminase 6 [Source:VGNC Symbol;Acc:VGNC:95803]
ENSSSCG00000034528	Upregulated	216204	17	+	33099334	33139135	TCONS_00095594	10	11881	XLOC_026273	TGM6	transglutaminase 6 [Source:VGNC Symbol;Acc:VGNC:95803]
ENSSSCG00000034528	Upregulated	216205	17	+	33099334	33139135	TCONS_00095595	10	11885	XLOC_026273	TGM6	transglutaminase 6 [Source:VGNC Symbol;Acc:VGNC:95803]
ENSSSCG00000034528	Upregulated	216206	17	+	33099334	33155176	TCONS_00095596	13	11459	XLOC_026273	TGM6	transglutaminase 6 [Source:VGNC Symbol;Acc:VGNC:95803]
ENSSSCG00000034528	Upregulated	216207	17	-	33108569	33155069	TCONS_00099394	13	2121	XLOC_027280	TGM6	transglutaminase 6 [Source:VGNC Symbol;Acc:VGNC:95803]
ENSSSCG00000034528	Upregulated	216208	17	-	33108678	33155069	TCONS_00099395	12	1878	XLOC_027280	TGM6	transglutaminase 6 [Source:VGNC Symbol;Acc:VGNC:95803]
ENSSSCG00000003069	Upregulated	91180	6	+	50574494	50589005	TCONS_00172031	8	5615	XLOC_046690	KCNN4	potassium calcium-activated channel subfamily N member 4 [Source:VGNC Symbol;Acc:VGNC:89381]
ENSSSCG00000003069	Upregulated	91181	6	+	50574494	50589005	TCONS_00172032	8	5493	XLOC_046690	KCNN4	potassium calcium-activated channel subfamily N member 4 [Source:VGNC Symbol;Acc:VGNC:89381]
ENSSSCG00000003069	Upregulated	91182	6	+	50574494	50589005	TCONS_00172033	8	5537	XLOC_046690	KCNN4	potassium calcium-activated channel subfamily N member 4 [Source:VGNC Symbol;Acc:VGNC:89381]
ENSSSCG00000003069	Upregulated	91183	6	+	50574494	50589005	TCONS_00172034	7	5316	XLOC_046690	KCNN4	potassium calcium-activated channel subfamily N member 4 [Source:VGNC Symbol;Acc:VGNC:89381]
ENSSSCG00000003069	Upregulated	91184	6	+	50579921	50589005	TCONS_00172035	7	1491	XLOC_046690	KCNN4	potassium calcium-activated channel subfamily N member 4 [Source:VGNC Symbol;Acc:VGNC:89381]
ENSSSCG00000003069	Upregulated	91185	6	+	50579938	50589005	TCONS_00172036	7	1352	XLOC_046690	KCNN4	potassium calcium-activated channel subfamily N member 4 [Source:VGNC Symbol;Acc:VGNC:89381]
ENSSSCG00000003069	Upregulated	91186	6	+	50579941	50589005	TCONS_00172037	7	1054	XLOC_046690	KCNN4	potassium calcium-activated channel subfamily N member 4 [Source:VGNC Symbol;Acc:VGNC:89381]
ENSSSCG00000003069	Upregulated	91187	6	+	50579948	50589005	TCONS_00172038	6	1345	XLOC_046690	KCNN4	potassium calcium-activated channel subfamily N member 4 [Source:VGNC Symbol;Acc:VGNC:89381]
ENSSSCG00000003069	Upregulated	91188	6	-	50580022	50593544	TCONS_00182821	9	1980	XLOC_049457	KCNN4	potassium calcium-activated channel subfamily N member 4 [Source:VGNC Symbol;Acc:VGNC:89381]
ENSSSCG00000003069	Upregulated	91189	6	-	50580022	50593544	TCONS_00182822	8	1977	XLOC_049457	KCNN4	potassium calcium-activated channel subfamily N member 4 [Source:VGNC Symbol;Acc:VGNC:89381]
ENSSSCG00000017222	Upregulated	155483	12	-	6323609	6332649	TCONS_00041520	5	2904	XLOC_011708	OTOP2	otopetrin 2 [Source:VGNC Symbol;Acc:VGNC:91094]
ENSSSCG00000017222	Upregulated	155484	12	-	6323609	6345344	TCONS_00041521	8	2966	XLOC_011708	OTOP2	otopetrin 2 [Source:VGNC Symbol;Acc:VGNC:91094]
ENSSSCG00000017222	Upregulated	155485	12	-	6323609	6345353	TCONS_00041522	10	3183	XLOC_011708	OTOP2	otopetrin 2 [Source:VGNC Symbol;Acc:VGNC:91094]
ENSSSCG00000017222	Upregulated	155486	12	-	6323609	6345353	TCONS_00041523	9	3082	XLOC_011708	OTOP2	otopetrin 2 [Source:VGNC Symbol;Acc:VGNC:91094]
ENSSSCG00000017222	Upregulated	155487	12	-	6323609	6345903	TCONS_00041524	8	3092	XLOC_011708	OTOP2	otopetrin 2 [Source:VGNC Symbol;Acc:VGNC:91094]
ENSSSCG00000017222	Upregulated	155488	12	-	6323609	6345903	TCONS_00041525	8	3056	XLOC_011708	OTOP2	otopetrin 2 [Source:VGNC Symbol;Acc:VGNC:91094]
ENSSSCG00000017222	Upregulated	155489	12	-	6323609	6345903	TCONS_00041526	8	3074	XLOC_011708	OTOP2	otopetrin 2 [Source:VGNC Symbol;Acc:VGNC:91094]
ENSSSCG00000017222	Upregulated	155490	12	+	6323673	6332927	TCONS_00035414	6	2589	XLOC_010280	OTOP2	otopetrin 2 [Source:VGNC Symbol;Acc:VGNC:91094]
ENSSSCG00000017222	Upregulated	155491	12	+	6323673	6332927	TCONS_00035415	6	2571	XLOC_010280	OTOP2	otopetrin 2 [Source:VGNC Symbol;Acc:VGNC:91094]
ENSSSCG00000017222	Upregulated	155492	12	+	6323767	6332656	TCONS_00035416	5	2753	XLOC_010280	OTOP2	otopetrin 2 [Source:VGNC Symbol;Acc:VGNC:91094]
ENSSSCG00000017222	Upregulated	155493	12	-	6324193	6333338	TCONS_00041527	7	2215	XLOC_011708	OTOP2	otopetrin 2 [Source:VGNC Symbol;Acc:VGNC:91094]
ENSSSCG00000010437	Upregulated	193478	14	+	99573006	99717944	TCONS_00069119	4	294	XLOC_018897	PAPSS2	3'-phosphoadenosine 5'-phosphosulfate synthase 2 [Source:VGNC Symbol;Acc:VGNC:91173]
ENSSSCG00000010437	Upregulated	193485	14	+	99685510	99808669	TCONS_00069123	12	4118	XLOC_018898	PAPSS2	3'-phosphoadenosine 5'-phosphosulfate synthase 2 [Source:VGNC Symbol;Acc:VGNC:91173]
ENSSSCG00000010437	Upregulated	193486	14	+	99685578	99805884	TCONS_00069124	11	1830	XLOC_018898	PAPSS2	3'-phosphoadenosine 5'-phosphosulfate synthase 2 [Source:VGNC Symbol;Acc:VGNC:91173]
ENSSSCG00000010437	Upregulated	193489	14	+	99718308	99808389	TCONS_00069125	13	4002	XLOC_018898	PAPSS2	3'-phosphoadenosine 5'-phosphosulfate synthase 2 [Source:VGNC Symbol;Acc:VGNC:91173]
ENSSSCG00000010437	Upregulated	193490	14	+	99718308	99808669	TCONS_00069126	12	4267	XLOC_018898	PAPSS2	3'-phosphoadenosine 5'-phosphosulfate synthase 2 [Source:VGNC Symbol;Acc:VGNC:91173]
ENSSSCG00000010437	Upregulated	193498	14	+	99748266	99885310	TCONS_00069127	23	9725	XLOC_018898	PAPSS2	3'-phosphoadenosine 5'-phosphosulfate synthase 2 [Source:VGNC Symbol;Acc:VGNC:91173]
ENSSSCG00000010437	Upregulated	193500	14	+	99748306	99808669	TCONS_00069128	12	3904	XLOC_018898	PAPSS2	3'-phosphoadenosine 5'-phosphosulfate synthase 2 [Source:VGNC Symbol;Acc:VGNC:91173]
ENSSSCG00000010437	Upregulated	193501	14	+	99751405	99808669	TCONS_00069129	12	3927	XLOC_018898	PAPSS2	3'-phosphoadenosine 5'-phosphosulfate synthase 2 [Source:VGNC Symbol;Acc:VGNC:91173]
ENSSSCG00000010437	Upregulated	193503	14	+	99767615	99808669	TCONS_00069130	12	3919	XLOC_018898	PAPSS2	3'-phosphoadenosine 5'-phosphosulfate synthase 2 [Source:VGNC Symbol;Acc:VGNC:91173]
ENSSSCG00000010437	Upregulated	193504	14	+	99770700	99808669	TCONS_00069131	11	3808	XLOC_018898	PAPSS2	3'-phosphoadenosine 5'-phosphosulfate synthase 2 [Source:VGNC Symbol;Acc:VGNC:91173]
ENSSSCG00000010437	Upregulated	193511	14	-	99799253	99799679	TCONS_00076725	1	427	XLOC_020716	PAPSS2	3'-phosphoadenosine 5'-phosphosulfate synthase 2 [Source:VGNC Symbol;Acc:VGNC:91173]
ENSSSCG00000010437	Upregulated	193512	14	-	99800767	99801367	TCONS_00076726	1	601	XLOC_020717	PAPSS2	3'-phosphoadenosine 5'-phosphosulfate synthase 2 [Source:VGNC Symbol;Acc:VGNC:91173]
ENSSSCG00000010437	Upregulated	193513	14	-	99801591	99802020	TCONS_00076727	1	430	XLOC_020718	PAPSS2	3'-phosphoadenosine 5'-phosphosulfate synthase 2 [Source:VGNC Symbol;Acc:VGNC:91173]
ENSSSCG00000010437	Upregulated	193514	14	+	99802037	99808669	TCONS_00069132	5	2925	XLOC_018898	PAPSS2	3'-phosphoadenosine 5'-phosphosulfate synthase 2 [Source:VGNC Symbol;Acc:VGNC:91173]
ENSSSCG00000014112	Upregulated	36655	2	+	87999700	88089426	TCONS_00113813	10	4462	XLOC_031108	JMY	junction mediating and regulatory protein, p53 cofactor [Source:VGNC Symbol;Acc:VGNC:89289]
ENSSSCG00000014112	Upregulated	36656	2	+	87999700	88089426	TCONS_00113814	11	4636	XLOC_031108	JMY	junction mediating and regulatory protein, p53 cofactor [Source:VGNC Symbol;Acc:VGNC:89289]
ENSSSCG00000014112	Upregulated	36657	2	+	87999700	88098590	TCONS_00113815	12	9549	XLOC_031108	JMY	junction mediating and regulatory protein, p53 cofactor [Source:VGNC Symbol;Acc:VGNC:89289]
ENSSSCG00000014112	Upregulated	36658	2	+	87999700	88098590	TCONS_00113816	11	9375	XLOC_031108	JMY	junction mediating and regulatory protein, p53 cofactor [Source:VGNC Symbol;Acc:VGNC:89289]
ENSSSCG00000014112	Upregulated	36659	2	+	87999700	88098590	TCONS_00113817	12	9549	XLOC_031108	JMY	junction mediating and regulatory protein, p53 cofactor [Source:VGNC Symbol;Acc:VGNC:89289]
ENSSSCG00000014112	Upregulated	36660	2	+	87999700	88098590	TCONS_00113818	12	9549	XLOC_031108	JMY	junction mediating and regulatory protein, p53 cofactor [Source:VGNC Symbol;Acc:VGNC:89289]
ENSSSCG00000014112	Upregulated	36661	2	+	87999700	88098590	TCONS_00113819	13	9503	XLOC_031108	JMY	junction mediating and regulatory protein, p53 cofactor [Source:VGNC Symbol;Acc:VGNC:89289]
ENSSSCG00000014112	Upregulated	36668	2	+	88022197	88098590	TCONS_00113822	10	9618	XLOC_031108	JMY	junction mediating and regulatory protein, p53 cofactor [Source:VGNC Symbol;Acc:VGNC:89289]
ENSSSCG00000014112	Upregulated	36669	2	+	88022709	88089405	TCONS_00113823	9	4172	XLOC_031108	JMY	junction mediating and regulatory protein, p53 cofactor [Source:VGNC Symbol;Acc:VGNC:89289]
ENSSSCG00000014112	Upregulated	36677	2	+	88022936	88089426	TCONS_00113824	10	4140	XLOC_031108	JMY	junction mediating and regulatory protein, p53 cofactor [Source:VGNC Symbol;Acc:VGNC:89289]
ENSSSCG00000014112	Upregulated	36680	2	-	88083581	88098471	TCONS_00123785	4	6260	XLOC_033695	JMY	junction mediating and regulatory protein, p53 cofactor [Source:VGNC Symbol;Acc:VGNC:89289]
ENSSSCG00000014112	Upregulated	36681	2	-	88087878	88098599	TCONS_00123786	3	6015	XLOC_033695	JMY	junction mediating and regulatory protein, p53 cofactor [Source:VGNC Symbol;Acc:VGNC:89289]
ENSSSCG00000023627	Upregulated	198216	15	-	2578071	2690285	TCONS_00084033	7	3153	XLOC_022774	ENSSSCG00000023627
ENSSSCG00000023627	Upregulated	198220	15	-	2579621	2696013	TCONS_00084034	4	3236	XLOC_022774	ENSSSCG00000023627
ENSSSCG00000023627	Upregulated	198221	15	-	2579621	2696636	TCONS_00084035	5	4067	XLOC_022774	ENSSSCG00000023627
ENSSSCG00000023627	Upregulated	198222	15	-	2579621	2696636	TCONS_00084036	6	4147	XLOC_022774	ENSSSCG00000023627
ENSSSCG00000023627	Upregulated	198229	15	+	2579668	2583282	TCONS_00079015	2	3087	XLOC_021340	ENSSSCG00000023627
ENSSSCG00000023627	Upregulated	198237	15	+	2579691	2592818	TCONS_00079023	3	3022	XLOC_021340	ENSSSCG00000023627
ENSSSCG00000023627	Upregulated	198240	15	-	2587282	2589848	TCONS_00084037	2	2296	XLOC_022774	ENSSSCG00000023627
ENSSSCG00000023627	Upregulated	198241	15	-	2587282	2696636	TCONS_00084038	4	6576	XLOC_022774	ENSSSCG00000023627
ENSSSCG00000023627	Upregulated	198242	15	-	2587282	2696636	TCONS_00084039	5	6305	XLOC_022774	ENSSSCG00000023627
ENSSSCG00000023627	Upregulated	198243	15	-	2588216	2696636	TCONS_00084040	4	5642	XLOC_022774	ENSSSCG00000023627
ENSSSCG00000003973	Upregulated	105492	6	-	170201678	170225052	TCONS_00190055	17	2297	XLOC_051251	CTPS1	CTP synthase 1 [Source:VGNC Symbol;Acc:VGNC:87070]
ENSSSCG00000003973	Upregulated	105493	6	-	170201678	170231697	TCONS_00190056	19	2722	XLOC_051251	CTPS1	CTP synthase 1 [Source:VGNC Symbol;Acc:VGNC:87070]
ENSSSCG00000003973	Upregulated	105494	6	-	170201678	170231722	TCONS_00190057	20	2820	XLOC_051251	CTPS1	CTP synthase 1 [Source:VGNC Symbol;Acc:VGNC:87070]
ENSSSCG00000003973	Upregulated	105495	6	-	170201678	170231969	TCONS_00190058	20	2807	XLOC_051251	CTPS1	CTP synthase 1 [Source:VGNC Symbol;Acc:VGNC:87070]
ENSSSCG00000003973	Upregulated	105496	6	-	170201678	170232036	TCONS_00190059	19	2801	XLOC_051251	CTPS1	CTP synthase 1 [Source:VGNC Symbol;Acc:VGNC:87070]
ENSSSCG00000003973	Upregulated	105497	6	-	170201678	170232835	TCONS_00190060	20	2808	XLOC_051251	CTPS1	CTP synthase 1 [Source:VGNC Symbol;Acc:VGNC:87070]
ENSSSCG00000003973	Upregulated	105498	6	-	170201678	170232929	TCONS_00190061	19	2829	XLOC_051251	CTPS1	CTP synthase 1 [Source:VGNC Symbol;Acc:VGNC:87070]
ENSSSCG00000003973	Upregulated	105499	6	-	170201678	170233054	TCONS_00190062	19	2834	XLOC_051251	CTPS1	CTP synthase 1 [Source:VGNC Symbol;Acc:VGNC:87070]
ENSSSCG00000003973	Upregulated	105500	6	-	170201678	170233054	TCONS_00190063	18	2828	XLOC_051251	CTPS1	CTP synthase 1 [Source:VGNC Symbol;Acc:VGNC:87070]
ENSSSCG00000003973	Upregulated	105501	6	-	170201678	170233054	TCONS_00190064	19	2834	XLOC_051251	CTPS1	CTP synthase 1 [Source:VGNC Symbol;Acc:VGNC:87070]
ENSSSCG00000003973	Upregulated	105502	6	-	170201678	170233054	TCONS_00190065	19	2901	XLOC_051251	CTPS1	CTP synthase 1 [Source:VGNC Symbol;Acc:VGNC:87070]
ENSSSCG00000003973	Upregulated	105503	6	-	170201678	170233054	TCONS_00190066	20	2907	XLOC_051251	CTPS1	CTP synthase 1 [Source:VGNC Symbol;Acc:VGNC:87070]
ENSSSCG00000003973	Upregulated	105504	6	-	170201678	170233054	TCONS_00190067	20	2907	XLOC_051251	CTPS1	CTP synthase 1 [Source:VGNC Symbol;Acc:VGNC:87070]
ENSSSCG00000003973	Upregulated	105506	6	-	170201748	170233019	TCONS_00190068	19	2796	XLOC_051251	CTPS1	CTP synthase 1 [Source:VGNC Symbol;Acc:VGNC:87070]
ENSSSCG00000003973	Upregulated	105507	6	-	170201748	170233019	TCONS_00190069	20	2802	XLOC_051251	CTPS1	CTP synthase 1 [Source:VGNC Symbol;Acc:VGNC:87070]
ENSSSCG00000003973	Upregulated	105512	6	-	170204986	170233054	TCONS_00190070	17	1908	XLOC_051251	CTPS1	CTP synthase 1 [Source:VGNC Symbol;Acc:VGNC:87070]
ENSSSCG00000003973	Upregulated	105513	6	-	170219646	170326128	TCONS_00190071	2	313	XLOC_051252	CTPS1	CTP synthase 1 [Source:VGNC Symbol;Acc:VGNC:87070]
ENSSSCG00000015001	Upregulated	132457	9	+	36286330	36341217	TCONS_00215261	8	983	XLOC_058484	SLC35F2	solute carrier family 35 member F2 [Source:VGNC Symbol;Acc:VGNC:93082]
ENSSSCG00000015001	Upregulated	132458	9	-	36288556	36289725	TCONS_00221449	2	1083	XLOC_060226	SLC35F2	solute carrier family 35 member F2 [Source:VGNC Symbol;Acc:VGNC:93082]
ENSSSCG00000015001	Upregulated	132459	9	-	36288556	36298089	TCONS_00221450	6	1586	XLOC_060226	SLC35F2	solute carrier family 35 member F2 [Source:VGNC Symbol;Acc:VGNC:93082]
ENSSSCG00000015001	Upregulated	132460	9	-	36288556	36341285	TCONS_00221451	8	1941	XLOC_060226	SLC35F2	solute carrier family 35 member F2 [Source:VGNC Symbol;Acc:VGNC:93082]
ENSSSCG00000015001	Upregulated	132461	9	-	36288556	36341285	TCONS_00221452	8	1987	XLOC_060226	SLC35F2	solute carrier family 35 member F2 [Source:VGNC Symbol;Acc:VGNC:93082]
ENSSSCG00000015001	Upregulated	132462	9	-	36288556	36341285	TCONS_00221453	8	1987	XLOC_060226	SLC35F2	solute carrier family 35 member F2 [Source:VGNC Symbol;Acc:VGNC:93082]
ENSSSCG00000015001	Upregulated	132463	9	-	36288556	36341285	TCONS_00221454	6	1779	XLOC_060226	SLC35F2	solute carrier family 35 member F2 [Source:VGNC Symbol;Acc:VGNC:93082]
ENSSSCG00000015001	Upregulated	132464	9	-	36288556	36341285	TCONS_00221455	8	1987	XLOC_060226	SLC35F2	solute carrier family 35 member F2 [Source:VGNC Symbol;Acc:VGNC:93082]
ENSSSCG00000015001	Upregulated	132465	9	-	36288556	36341285	TCONS_00221456	8	1987	XLOC_060226	SLC35F2	solute carrier family 35 member F2 [Source:VGNC Symbol;Acc:VGNC:93082]
ENSSSCG00000015001	Upregulated	132466	9	-	36288556	36341285	TCONS_00221457	8	1987	XLOC_060226	SLC35F2	solute carrier family 35 member F2 [Source:VGNC Symbol;Acc:VGNC:93082]
ENSSSCG00000015001	Upregulated	132467	9	-	36288556	36341285	TCONS_00221458	8	1987	XLOC_060226	SLC35F2	solute carrier family 35 member F2 [Source:VGNC Symbol;Acc:VGNC:93082]
ENSSSCG00000015001	Upregulated	132468	9	-	36288556	36341285	TCONS_00221459	8	1987	XLOC_060226	SLC35F2	solute carrier family 35 member F2 [Source:VGNC Symbol;Acc:VGNC:93082]
ENSSSCG00000015001	Upregulated	132469	9	-	36288556	36341285	TCONS_00221460	8	1949	XLOC_060226	SLC35F2	solute carrier family 35 member F2 [Source:VGNC Symbol;Acc:VGNC:93082]
ENSSSCG00000015001	Upregulated	132470	9	-	36288556	36341285	TCONS_00221461	8	1987	XLOC_060226	SLC35F2	solute carrier family 35 member F2 [Source:VGNC Symbol;Acc:VGNC:93082]
ENSSSCG00000015001	Upregulated	132471	9	+	36288584	36341217	TCONS_00215262	8	1891	XLOC_058484	SLC35F2	solute carrier family 35 member F2 [Source:VGNC Symbol;Acc:VGNC:93082]
ENSSSCG00000015001	Upregulated	132472	9	+	36288599	36341217	TCONS_00215263	7	1700	XLOC_058484	SLC35F2	solute carrier family 35 member F2 [Source:VGNC Symbol;Acc:VGNC:93082]
ENSSSCG00000015001	Upregulated	132473	9	+	36288600	36298072	TCONS_00215264	6	1525	XLOC_058484	SLC35F2	solute carrier family 35 member F2 [Source:VGNC Symbol;Acc:VGNC:93082]
ENSSSCG00000015001	Upregulated	132474	9	+	36288611	36296293	TCONS_00215265	4	1154	XLOC_058484	SLC35F2	solute carrier family 35 member F2 [Source:VGNC Symbol;Acc:VGNC:93082]
ENSSSCG00000015001	Upregulated	132475	9	+	36288611	36341217	TCONS_00215266	8	1826	XLOC_058484	SLC35F2	solute carrier family 35 member F2 [Source:VGNC Symbol;Acc:VGNC:93082]
ENSSSCG00000015001	Upregulated	132476	9	+	36288611	36341217	TCONS_00215267	8	1818	XLOC_058484	SLC35F2	solute carrier family 35 member F2 [Source:VGNC Symbol;Acc:VGNC:93082]
ENSSSCG00000015001	Upregulated	132477	9	+	36288611	36341217	TCONS_00215268	7	1765	XLOC_058484	SLC35F2	solute carrier family 35 member F2 [Source:VGNC Symbol;Acc:VGNC:93082]
ENSSSCG00000000672	Upregulated	80107	5	-	63513225	63606540	TCONS_00166503	2	636	XLOC_045186	CLSTN3	calsyntenin 3 [Source:VGNC Symbol;Acc:VGNC:86786]
ENSSSCG00000000672	Upregulated	80133	5	-	63572062	63599525	TCONS_00166518	20	3799	XLOC_045193	CLSTN3	calsyntenin 3 [Source:VGNC Symbol;Acc:VGNC:86786]
ENSSSCG00000000672	Upregulated	80134	5	-	63572062	63599525	TCONS_00166519	19	3872	XLOC_045193	CLSTN3	calsyntenin 3 [Source:VGNC Symbol;Acc:VGNC:86786]
ENSSSCG00000000672	Upregulated	80135	5	-	63572062	63607112	TCONS_00166520	21	3513	XLOC_045193	CLSTN3	calsyntenin 3 [Source:VGNC Symbol;Acc:VGNC:86786]
ENSSSCG00000000672	Upregulated	80136	5	-	63572062	63610216	TCONS_00166521	19	6737	XLOC_045193	CLSTN3	calsyntenin 3 [Source:VGNC Symbol;Acc:VGNC:86786]
ENSSSCG00000000672	Upregulated	80137	5	-	63572062	63610618	TCONS_00166522	20	3630	XLOC_045193	CLSTN3	calsyntenin 3 [Source:VGNC Symbol;Acc:VGNC:86786]
ENSSSCG00000000672	Upregulated	80138	5	-	63572067	63574565	TCONS_00166523	4	1768	XLOC_045193	CLSTN3	calsyntenin 3 [Source:VGNC Symbol;Acc:VGNC:86786]
ENSSSCG00000000672	Upregulated	80139	5	-	63572067	63599483	TCONS_00166524	19	3839	XLOC_045193	CLSTN3	calsyntenin 3 [Source:VGNC Symbol;Acc:VGNC:86786]
ENSSSCG00000000672	Upregulated	80140	5	-	63572067	63607112	TCONS_00166525	20	3595	XLOC_045193	CLSTN3	calsyntenin 3 [Source:VGNC Symbol;Acc:VGNC:86786]
ENSSSCG00000000672	Upregulated	80141	5	-	63572067	63610618	TCONS_00166526	19	3712	XLOC_045193	CLSTN3	calsyntenin 3 [Source:VGNC Symbol;Acc:VGNC:86786]
ENSSSCG00000000672	Upregulated	80145	5	-	63576672	63612344	TCONS_00166527	2	2116	XLOC_045194	CLSTN3	calsyntenin 3 [Source:VGNC Symbol;Acc:VGNC:86786]
ENSSSCG00000000672	Upregulated	80149	5	+	63601135	63610559	TCONS_00160523	5	4147	XLOC_043556	CLSTN3	calsyntenin 3 [Source:VGNC Symbol;Acc:VGNC:86786]
ENSSSCG00000000672	Upregulated	80150	5	+	63601147	63613320	TCONS_00160524	4	560	XLOC_043556	CLSTN3	calsyntenin 3 [Source:VGNC Symbol;Acc:VGNC:86786]
ENSSSCG00000000672	Upregulated	80151	5	+	63601157	63610559	TCONS_00160525	5	4166	XLOC_043556	CLSTN3	calsyntenin 3 [Source:VGNC Symbol;Acc:VGNC:86786]
ENSSSCG00000000672	Upregulated	80152	5	+	63601159	63606393	TCONS_00160526	5	2020	XLOC_043556	CLSTN3	calsyntenin 3 [Source:VGNC Symbol;Acc:VGNC:86786]
ENSSSCG00000000672	Upregulated	80153	5	+	63601631	63613320	TCONS_00160527	4	505	XLOC_043556	CLSTN3	calsyntenin 3 [Source:VGNC Symbol;Acc:VGNC:86786]
ENSSSCG00000036152	Upregulated	191607	14	+	72468799	72555176	TCONS_00068276	10	2056	XLOC_018661	TSPAN15	tetraspanin 15 [Source:VGNC Symbol;Acc:VGNC:94504]
ENSSSCG00000036152	Upregulated	191608	14	+	72468914	72555078	TCONS_00068277	10	1843	XLOC_018661	TSPAN15	tetraspanin 15 [Source:VGNC Symbol;Acc:VGNC:94504]
ENSSSCG00000036152	Upregulated	191609	14	+	72501353	72555082	TCONS_00068278	7	1544	XLOC_018661	TSPAN15	tetraspanin 15 [Source:VGNC Symbol;Acc:VGNC:94504]
ENSSSCG00000036152	Upregulated	191610	14	+	72501353	72555176	TCONS_00068279	8	1713	XLOC_018661	TSPAN15	tetraspanin 15 [Source:VGNC Symbol;Acc:VGNC:94504]
ENSSSCG00000036152	Upregulated	191611	14	+	72501353	72555176	TCONS_00068280	8	1713	XLOC_018661	TSPAN15	tetraspanin 15 [Source:VGNC Symbol;Acc:VGNC:94504]
ENSSSCG00000036152	Upregulated	191612	14	+	72501353	72555176	TCONS_00068281	8	1722	XLOC_018661	TSPAN15	tetraspanin 15 [Source:VGNC Symbol;Acc:VGNC:94504]
ENSSSCG00000036152	Upregulated	191613	14	+	72501353	72555176	TCONS_00068282	7	1634	XLOC_018661	TSPAN15	tetraspanin 15 [Source:VGNC Symbol;Acc:VGNC:94504]
ENSSSCG00000036152	Upregulated	191614	14	+	72501355	72555074	TCONS_00068283	9	1719	XLOC_018661	TSPAN15	tetraspanin 15 [Source:VGNC Symbol;Acc:VGNC:94504]
ENSSSCG00000036152	Upregulated	191615	14	-	72501361	72555059	TCONS_00075681	8	1584	XLOC_020459	TSPAN15	tetraspanin 15 [Source:VGNC Symbol;Acc:VGNC:94504]
ENSSSCG00000036152	Upregulated	191616	14	-	72501361	72555059	TCONS_00075682	8	1584	XLOC_020459	TSPAN15	tetraspanin 15 [Source:VGNC Symbol;Acc:VGNC:94504]
ENSSSCG00000036152	Upregulated	191617	14	-	72501361	72555059	TCONS_00075683	7	1513	XLOC_020459	TSPAN15	tetraspanin 15 [Source:VGNC Symbol;Acc:VGNC:94504]
ENSSSCG00000036152	Upregulated	191618	14	-	72501361	72555075	TCONS_00075684	8	1604	XLOC_020459	TSPAN15	tetraspanin 15 [Source:VGNC Symbol;Acc:VGNC:94504]
ENSSSCG00000036152	Upregulated	191619	14	+	72501386	72555080	TCONS_00068284	8	1737	XLOC_018661	TSPAN15	tetraspanin 15 [Source:VGNC Symbol;Acc:VGNC:94504]
ENSSSCG00000036152	Upregulated	191620	14	+	72542539	72555176	TCONS_00068285	6	1660	XLOC_018661	TSPAN15	tetraspanin 15 [Source:VGNC Symbol;Acc:VGNC:94504]
ENSSSCG00000036152	Upregulated	191621	14	-	72543349	72555059	TCONS_00075685	6	1632	XLOC_020459	TSPAN15	tetraspanin 15 [Source:VGNC Symbol;Acc:VGNC:94504]
ENSSSCG00000036152	Upregulated	191622	14	+	72543600	72555176	TCONS_00068286	6	1498	XLOC_018661	TSPAN15	tetraspanin 15 [Source:VGNC Symbol;Acc:VGNC:94504]
ENSSSCG00000025789	Upregulated	158166	12	+	21408507	21408887	TCONS_00036797	1	381	XLOC_010574	ENSSSCG00000025789
ENSSSCG00000025789	Upregulated	158167	12	-	21408848	21409151	TCONS_00042815	1	304	XLOC_012031	ENSSSCG00000025789
ENSSSCG00000013617	Upregulated	32607	2	-	70097439	70126262	TCONS_00121727	24	6795	XLOC_033239	ELAVL3	ELAV like RNA binding protein 3 [Source:VGNC Symbol;Acc:VGNC:87640]
ENSSSCG00000013617	Upregulated	32608	2	-	70097439	70126685	TCONS_00121728	24	7167	XLOC_033239	ELAVL3	ELAV like RNA binding protein 3 [Source:VGNC Symbol;Acc:VGNC:87640]
ENSSSCG00000013617	Upregulated	32609	2	-	70097439	70134350	TCONS_00121729	24	7243	XLOC_033239	ELAVL3	ELAV like RNA binding protein 3 [Source:VGNC Symbol;Acc:VGNC:87640]
ENSSSCG00000013617	Upregulated	32619	2	-	70117061	70126262	TCONS_00121730	7	1636	XLOC_033239	ELAVL3	ELAV like RNA binding protein 3 [Source:VGNC Symbol;Acc:VGNC:87640]
ENSSSCG00000013617	Upregulated	32620	2	-	70117061	70134350	TCONS_00121731	7	2084	XLOC_033239	ELAVL3	ELAV like RNA binding protein 3 [Source:VGNC Symbol;Acc:VGNC:87640]
ENSSSCG00000013617	Upregulated	32621	2	+	70117095	70134238	TCONS_00111823	6	1759	XLOC_030721	ELAVL3	ELAV like RNA binding protein 3 [Source:VGNC Symbol;Acc:VGNC:87640]
ENSSSCG00000013617	Upregulated	32622	2	+	70117112	70134238	TCONS_00111824	7	1897	XLOC_030721	ELAVL3	ELAV like RNA binding protein 3 [Source:VGNC Symbol;Acc:VGNC:87640]
ENSSSCG00000013617	Upregulated	32623	2	+	70117903	70134238	TCONS_00111825	7	1109	XLOC_030721	ELAVL3	ELAV like RNA binding protein 3 [Source:VGNC Symbol;Acc:VGNC:87640]
ENSSSCG00000013617	Upregulated	32624	2	-	70117959	70134350	TCONS_00121732	7	1186	XLOC_033239	ELAVL3	ELAV like RNA binding protein 3 [Source:VGNC Symbol;Acc:VGNC:87640]
ENSSSCG00000013617	Upregulated	32625	2	-	70119630	70126262	TCONS_00121733	6	1151	XLOC_033239	ELAVL3	ELAV like RNA binding protein 3 [Source:VGNC Symbol;Acc:VGNC:87640]
ENSSSCG00000013617	Upregulated	32626	2	-	70119630	70134350	TCONS_00121734	6	1599	XLOC_033239	ELAVL3	ELAV like RNA binding protein 3 [Source:VGNC Symbol;Acc:VGNC:87640]
ENSSSCG00000013617	Upregulated	32627	2	-	70119630	70134350	TCONS_00121735	6	1464	XLOC_033239	ELAVL3	ELAV like RNA binding protein 3 [Source:VGNC Symbol;Acc:VGNC:87640]
ENSSSCG00000013617	Upregulated	32628	2	+	70119689	70134238	TCONS_00111826	6	1425	XLOC_030721	ELAVL3	ELAV like RNA binding protein 3 [Source:VGNC Symbol;Acc:VGNC:87640]
ENSSSCG00000013617	Upregulated	32629	2	+	70119689	70134238	TCONS_00111827	6	1428	XLOC_030721	ELAVL3	ELAV like RNA binding protein 3 [Source:VGNC Symbol;Acc:VGNC:87640]
ENSSSCG00000021082	Upregulated	40453	2	-	141660386	141693406	TCONS_00125690	9	3687	XLOC_034231	NRG2	neuregulin 2 [Source:VGNC Symbol;Acc:VGNC:98160]
ENSSSCG00000021082	Upregulated	40454	2	-	141660386	141694432	TCONS_00125691	9	3699	XLOC_034231	NRG2	neuregulin 2 [Source:VGNC Symbol;Acc:VGNC:98160]
ENSSSCG00000021082	Upregulated	40455	2	-	141660386	141695100	TCONS_00125692	2	1920	XLOC_034231	NRG2	neuregulin 2 [Source:VGNC Symbol;Acc:VGNC:98160]
ENSSSCG00000021082	Upregulated	40456	2	-	141660386	141704589	TCONS_00125693	10	3909	XLOC_034231	NRG2	neuregulin 2 [Source:VGNC Symbol;Acc:VGNC:98160]
ENSSSCG00000021082	Upregulated	40457	2	-	141660386	141708800	TCONS_00125694	10	3877	XLOC_034231	NRG2	neuregulin 2 [Source:VGNC Symbol;Acc:VGNC:98160]
ENSSSCG00000021082	Upregulated	40458	2	-	141660386	141709561	TCONS_00125695	10	3867	XLOC_034231	NRG2	neuregulin 2 [Source:VGNC Symbol;Acc:VGNC:98160]
ENSSSCG00000021082	Upregulated	40459	2	-	141660386	141712947	TCONS_00125696	10	3849	XLOC_034231	NRG2	neuregulin 2 [Source:VGNC Symbol;Acc:VGNC:98160]
ENSSSCG00000021082	Upregulated	40460	2	-	141660386	141713428	TCONS_00125697	10	4231	XLOC_034231	NRG2	neuregulin 2 [Source:VGNC Symbol;Acc:VGNC:98160]
ENSSSCG00000021082	Upregulated	40461	2	-	141660386	141713428	TCONS_00125698	10	4231	XLOC_034231	NRG2	neuregulin 2 [Source:VGNC Symbol;Acc:VGNC:98160]
ENSSSCG00000021082	Upregulated	40462	2	-	141660386	141713428	TCONS_00125699	11	4255	XLOC_034231	NRG2	neuregulin 2 [Source:VGNC Symbol;Acc:VGNC:98160]
ENSSSCG00000021082	Upregulated	40463	2	-	141660386	141713428	TCONS_00125700	11	4237	XLOC_034231	NRG2	neuregulin 2 [Source:VGNC Symbol;Acc:VGNC:98160]
ENSSSCG00000021082	Upregulated	40464	2	-	141660386	141824727	TCONS_00125701	10	4718	XLOC_034231	NRG2	neuregulin 2 [Source:VGNC Symbol;Acc:VGNC:98160]
ENSSSCG00000021082	Upregulated	40465	2	-	141660386	141824727	TCONS_00125702	10	4736	XLOC_034231	NRG2	neuregulin 2 [Source:VGNC Symbol;Acc:VGNC:98160]
ENSSSCG00000021082	Upregulated	40466	2	-	141660386	141824727	TCONS_00125703	11	4760	XLOC_034231	NRG2	neuregulin 2 [Source:VGNC Symbol;Acc:VGNC:98160]
ENSSSCG00000021082	Upregulated	40467	2	-	141660386	141824727	TCONS_00125704	8	4538	XLOC_034231	NRG2	neuregulin 2 [Source:VGNC Symbol;Acc:VGNC:98160]
ENSSSCG00000021082	Upregulated	40468	2	-	141660386	141824727	TCONS_00125705	11	4742	XLOC_034231	NRG2	neuregulin 2 [Source:VGNC Symbol;Acc:VGNC:98160]
ENSSSCG00000021082	Upregulated	40470	2	-	141662369	141713428	TCONS_00125706	10	2248	XLOC_034231	NRG2	neuregulin 2 [Source:VGNC Symbol;Acc:VGNC:98160]
ENSSSCG00000021082	Upregulated	40471	2	-	141662369	141824727	TCONS_00125707	10	2753	XLOC_034231	NRG2	neuregulin 2 [Source:VGNC Symbol;Acc:VGNC:98160]
ENSSSCG00000021082	Upregulated	40472	2	-	141662369	141824727	TCONS_00125708	11	2759	XLOC_034231	NRG2	neuregulin 2 [Source:VGNC Symbol;Acc:VGNC:98160]
ENSSSCG00000021082	Upregulated	40473	2	-	141662369	141824727	TCONS_00125709	11	2777	XLOC_034231	NRG2	neuregulin 2 [Source:VGNC Symbol;Acc:VGNC:98160]
ENSSSCG00000021082	Upregulated	40474	2	-	141662369	141824727	TCONS_00125710	8	2555	XLOC_034231	NRG2	neuregulin 2 [Source:VGNC Symbol;Acc:VGNC:98160]
ENSSSCG00000021082	Upregulated	40475	2	-	141662369	141824727	TCONS_00125711	10	2735	XLOC_034231	NRG2	neuregulin 2 [Source:VGNC Symbol;Acc:VGNC:98160]
ENSSSCG00000021082	Upregulated	40476	2	+	141662800	141713184	TCONS_00115670	10	1573	XLOC_031663	NRG2	neuregulin 2 [Source:VGNC Symbol;Acc:VGNC:98160]
ENSSSCG00000021082	Upregulated	40477	2	+	141663043	141709597	TCONS_00115671	10	1246	XLOC_031663	NRG2	neuregulin 2 [Source:VGNC Symbol;Acc:VGNC:98160]
ENSSSCG00000021082	Upregulated	40478	2	+	141663068	141704554	TCONS_00115672	11	1251	XLOC_031663	NRG2	neuregulin 2 [Source:VGNC Symbol;Acc:VGNC:98160]
ENSSSCG00000021082	Upregulated	40479	2	+	141663068	141713184	TCONS_00115673	11	1364	XLOC_031663	NRG2	neuregulin 2 [Source:VGNC Symbol;Acc:VGNC:98160]
ENSSSCG00000021082	Upregulated	40480	2	-	141667033	141713428	TCONS_00125712	8	1106	XLOC_034231	NRG2	neuregulin 2 [Source:VGNC Symbol;Acc:VGNC:98160]
ENSSSCG00000021082	Upregulated	40481	2	+	141667475	141709597	TCONS_00115674	7	657	XLOC_031663	NRG2	neuregulin 2 [Source:VGNC Symbol;Acc:VGNC:98160]
ENSSSCG00000021082	Upregulated	40482	2	-	141682466	141694423	TCONS_00125713	5	1310	XLOC_034231	NRG2	neuregulin 2 [Source:VGNC Symbol;Acc:VGNC:98160]
ENSSSCG00000021082	Upregulated	40483	2	-	141682466	141713428	TCONS_00125714	6	1851	XLOC_034231	NRG2	neuregulin 2 [Source:VGNC Symbol;Acc:VGNC:98160]
ENSSSCG00000021082	Upregulated	40484	2	-	141682466	141713428	TCONS_00125715	6	1851	XLOC_034231	NRG2	neuregulin 2 [Source:VGNC Symbol;Acc:VGNC:98160]
ENSSSCG00000021082	Upregulated	40485	2	-	141682466	141824727	TCONS_00125716	6	2356	XLOC_034231	NRG2	neuregulin 2 [Source:VGNC Symbol;Acc:VGNC:98160]
ENSSSCG00000021082	Upregulated	40486	2	+	141683521	141713184	TCONS_00115675	5	592	XLOC_031663	NRG2	neuregulin 2 [Source:VGNC Symbol;Acc:VGNC:98160]
ENSSSCG00000017461	Upregulated	158215	12	+	21659135	21663716	TCONS_00036829	2	595	XLOC_010591	KRT28	keratin 28 [Source:VGNC Symbol;Acc:VGNC:89585]
ENSSSCG00000017461	Upregulated	158216	12	+	21659364	21669449	TCONS_00036830	8	1392	XLOC_010591	KRT28	keratin 28 [Source:VGNC Symbol;Acc:VGNC:89585]
ENSSSCG00000050408	Upregulated	108529	7	-	23538153	23558048	TCONS_00198470	20	7659	XLOC_053726	PSORS1C2	psoriasis susceptibility 1 candidate 2 [Source:NCBI gene (formerly Entrezgene);Acc:396560]
ENSSSCG00000050408	Upregulated	108530	7	-	23538153	23558048	TCONS_00198471	21	7850	XLOC_053726	PSORS1C2	psoriasis susceptibility 1 candidate 2 [Source:NCBI gene (formerly Entrezgene);Acc:396560]
ENSSSCG00000050408	Upregulated	108531	7	-	23538153	23558048	TCONS_00198472	20	7593	XLOC_053726	PSORS1C2	psoriasis susceptibility 1 candidate 2 [Source:NCBI gene (formerly Entrezgene);Acc:396560]
ENSSSCG00000050408	Upregulated	108532	7	-	23538153	23558048	TCONS_00198473	19	7449	XLOC_053726	PSORS1C2	psoriasis susceptibility 1 candidate 2 [Source:NCBI gene (formerly Entrezgene);Acc:396560]
ENSSSCG00000050408	Upregulated	108533	7	-	23538153	23558048	TCONS_00198474	20	7663	XLOC_053726	PSORS1C2	psoriasis susceptibility 1 candidate 2 [Source:NCBI gene (formerly Entrezgene);Acc:396560]
ENSSSCG00000050408	Upregulated	108534	7	+	23538165	23542620	TCONS_00191604	5	3342	XLOC_051789	PSORS1C2	psoriasis susceptibility 1 candidate 2 [Source:NCBI gene (formerly Entrezgene);Acc:396560]
ENSSSCG00000050408	Upregulated	108535	7	-	23540374	23558028	TCONS_00198475	20	5422	XLOC_053726	PSORS1C2	psoriasis susceptibility 1 candidate 2 [Source:NCBI gene (formerly Entrezgene);Acc:396560]
ENSSSCG00000010753	Upregulated	197516	14	-	137063607	137089792	TCONS_00078654	7	3356	XLOC_021203	CLRN3	clarin 3 [Source:VGNC Symbol;Acc:VGNC:86782]
ENSSSCG00000010753	Upregulated	197517	14	-	137063607	137090118	TCONS_00078655	7	3510	XLOC_021203	CLRN3	clarin 3 [Source:VGNC Symbol;Acc:VGNC:86782]
ENSSSCG00000010753	Upregulated	197518	14	-	137069087	137090255	TCONS_00078656	7	5281	XLOC_021203	CLRN3	clarin 3 [Source:VGNC Symbol;Acc:VGNC:86782]
ENSSSCG00000010753	Upregulated	197519	14	-	137069384	137089471	TCONS_00078657	6	3418	XLOC_021203	CLRN3	clarin 3 [Source:VGNC Symbol;Acc:VGNC:86782]
ENSSSCG00000010753	Upregulated	197520	14	-	137071529	137089811	TCONS_00078658	5	3119	XLOC_021203	CLRN3	clarin 3 [Source:VGNC Symbol;Acc:VGNC:86782]
ENSSSCG00000010753	Upregulated	197521	14	-	137071529	137089815	TCONS_00078659	7	3507	XLOC_021203	CLRN3	clarin 3 [Source:VGNC Symbol;Acc:VGNC:86782]
ENSSSCG00000010753	Upregulated	197522	14	+	137075326	137092718	TCONS_00071202	2	4311	XLOC_019373	CLRN3	clarin 3 [Source:VGNC Symbol;Acc:VGNC:86782]
ENSSSCG00000010753	Upregulated	197523	14	-	137077959	137089854	TCONS_00078660	5	2385	XLOC_021203	CLRN3	clarin 3 [Source:VGNC Symbol;Acc:VGNC:86782]
ENSSSCG00000010753	Upregulated	197524	14	+	137082042	137092718	TCONS_00071203	2	4448	XLOC_019373	CLRN3	clarin 3 [Source:VGNC Symbol;Acc:VGNC:86782]
ENSSSCG00000010753	Upregulated	197525	14	+	137084532	137092718	TCONS_00071204	3	4324	XLOC_019373	CLRN3	clarin 3 [Source:VGNC Symbol;Acc:VGNC:86782]
ENSSSCG00000010753	Upregulated	197526	14	-	137084559	137090147	TCONS_00078661	3	1726	XLOC_021203	CLRN3	clarin 3 [Source:VGNC Symbol;Acc:VGNC:86782]
ENSSSCG00000033728	Upregulated	62811	4	-	55116030	55119627	TCONS_00151819	3	631	XLOC_041267	FABP9	fatty acid binding protein 9 [Source:HGNC Symbol;Acc:HGNC:3563]
ENSSSCG00000033728	Upregulated	62812	4	-	55116030	55119703	TCONS_00151820	4	694	XLOC_041267	FABP9	fatty acid binding protein 9 [Source:HGNC Symbol;Acc:HGNC:3563]
ENSSSCG00000033728	Upregulated	62813	4	-	55116030	55120151	TCONS_00151821	4	1122	XLOC_041267	FABP9	fatty acid binding protein 9 [Source:HGNC Symbol;Acc:HGNC:3563]
ENSSSCG00000033728	Upregulated	62814	4	-	55116030	55124809	TCONS_00151822	3	590	XLOC_041267	FABP9	fatty acid binding protein 9 [Source:HGNC Symbol;Acc:HGNC:3563]
ENSSSCG00000033728	Upregulated	62823	4	+	55116340	55119825	TCONS_00145189	4	488	XLOC_039472	FABP9	fatty acid binding protein 9 [Source:HGNC Symbol;Acc:HGNC:3563]
ENSSSCG00000036441	Upregulated	62815	4	-	55116030	55141534	TCONS_00151823	9	6666	XLOC_041267	PMP2	peripheral myelin protein 2 [Source:NCBI gene (formerly Entrezgene);Acc:100151890]
ENSSSCG00000036441	Upregulated	62816	4	-	55116030	55141539	TCONS_00151824	9	6448	XLOC_041267	PMP2	peripheral myelin protein 2 [Source:NCBI gene (formerly Entrezgene);Acc:100151890]
ENSSSCG00000036441	Upregulated	62817	4	-	55116030	55141540	TCONS_00151825	9	6539	XLOC_041267	PMP2	peripheral myelin protein 2 [Source:NCBI gene (formerly Entrezgene);Acc:100151890]
ENSSSCG00000036441	Upregulated	62818	4	-	55116030	55141598	TCONS_00151826	7	8075	XLOC_041267	PMP2	peripheral myelin protein 2 [Source:NCBI gene (formerly Entrezgene);Acc:100151890]
ENSSSCG00000036441	Upregulated	62819	4	-	55116030	55141737	TCONS_00151827	9	2420	XLOC_041267	PMP2	peripheral myelin protein 2 [Source:NCBI gene (formerly Entrezgene);Acc:100151890]
ENSSSCG00000036441	Upregulated	62820	4	-	55116030	55141805	TCONS_00151828	8	8461	XLOC_041267	PMP2	peripheral myelin protein 2 [Source:NCBI gene (formerly Entrezgene);Acc:100151890]
ENSSSCG00000036441	Upregulated	62824	4	+	55116340	55120664	TCONS_00145190	4	1326	XLOC_039472	PMP2	peripheral myelin protein 2 [Source:NCBI gene (formerly Entrezgene);Acc:100151890]
ENSSSCG00000036441	Upregulated	62825	4	+	55116340	55120664	TCONS_00145191	4	1321	XLOC_039472	PMP2	peripheral myelin protein 2 [Source:NCBI gene (formerly Entrezgene);Acc:100151890]
ENSSSCG00000036441	Upregulated	62826	4	+	55116340	55142036	TCONS_00145192	6	3649	XLOC_039472	PMP2	peripheral myelin protein 2 [Source:NCBI gene (formerly Entrezgene);Acc:100151890]
ENSSSCG00000036441	Upregulated	62827	4	+	55118864	55142036	TCONS_00145193	5	3492	XLOC_039472	PMP2	peripheral myelin protein 2 [Source:NCBI gene (formerly Entrezgene);Acc:100151890]
ENSSSCG00000036441	Upregulated	62828	4	+	55120804	55141333	TCONS_00145194	7	6389	XLOC_039472	PMP2	peripheral myelin protein 2 [Source:NCBI gene (formerly Entrezgene);Acc:100151890]
ENSSSCG00000036441	Upregulated	62829	4	+	55120804	55142036	TCONS_00145195	7	7092	XLOC_039472	PMP2	peripheral myelin protein 2 [Source:NCBI gene (formerly Entrezgene);Acc:100151890]
ENSSSCG00000036441	Upregulated	62830	4	+	55135510	55141625	TCONS_00145196	3	1203	XLOC_039472	PMP2	peripheral myelin protein 2 [Source:NCBI gene (formerly Entrezgene);Acc:100151890]
ENSSSCG00000005380	Upregulated	18244	1	+	240653017	240828308	TCONS_00008966	52	6150	XLOC_002539	COL15A1	collagen type XV alpha 1 chain [Source:VGNC Symbol;Acc:VGNC:86866]
ENSSSCG00000005380	Upregulated	18245	1	+	240653017	240829188	TCONS_00008967	49	6973	XLOC_002539	COL15A1	collagen type XV alpha 1 chain [Source:VGNC Symbol;Acc:VGNC:86866]
ENSSSCG00000005380	Upregulated	18246	1	+	240653017	240829188	TCONS_00008968	50	6964	XLOC_002539	COL15A1	collagen type XV alpha 1 chain [Source:VGNC Symbol;Acc:VGNC:86866]
ENSSSCG00000005380	Upregulated	18247	1	+	240653017	240829188	TCONS_00008969	49	6928	XLOC_002539	COL15A1	collagen type XV alpha 1 chain [Source:VGNC Symbol;Acc:VGNC:86866]
ENSSSCG00000005380	Upregulated	18248	1	+	240653017	240829188	TCONS_00008970	50	6937	XLOC_002539	COL15A1	collagen type XV alpha 1 chain [Source:VGNC Symbol;Acc:VGNC:86866]
ENSSSCG00000005380	Upregulated	18249	1	+	240653017	240829188	TCONS_00008971	45	6661	XLOC_002539	COL15A1	collagen type XV alpha 1 chain [Source:VGNC Symbol;Acc:VGNC:86866]
ENSSSCG00000005380	Upregulated	18250	1	+	240653017	240829188	TCONS_00008972	53	6994	XLOC_002539	COL15A1	collagen type XV alpha 1 chain [Source:VGNC Symbol;Acc:VGNC:86866]
ENSSSCG00000005380	Upregulated	18251	1	+	240653017	240829188	TCONS_00008973	47	6820	XLOC_002539	COL15A1	collagen type XV alpha 1 chain [Source:VGNC Symbol;Acc:VGNC:86866]
ENSSSCG00000005380	Upregulated	18252	1	+	240714689	240829188	TCONS_00008974	41	4974	XLOC_002539	COL15A1	collagen type XV alpha 1 chain [Source:VGNC Symbol;Acc:VGNC:86866]
ENSSSCG00000005380	Upregulated	18253	1	+	240714689	240829188	TCONS_00008975	43	4920	XLOC_002539	COL15A1	collagen type XV alpha 1 chain [Source:VGNC Symbol;Acc:VGNC:86866]
ENSSSCG00000005380	Upregulated	18254	1	+	240714689	240829188	TCONS_00008976	36	4560	XLOC_002539	COL15A1	collagen type XV alpha 1 chain [Source:VGNC Symbol;Acc:VGNC:86866]
ENSSSCG00000005380	Upregulated	18255	1	+	240714689	240829188	TCONS_00008977	38	4872	XLOC_002539	COL15A1	collagen type XV alpha 1 chain [Source:VGNC Symbol;Acc:VGNC:86866]
ENSSSCG00000005380	Upregulated	18256	1	+	240714689	240829188	TCONS_00008978	41	4974	XLOC_002539	COL15A1	collagen type XV alpha 1 chain [Source:VGNC Symbol;Acc:VGNC:86866]
ENSSSCG00000005380	Upregulated	18257	1	+	240717993	240828793	TCONS_00008979	42	4714	XLOC_002539	COL15A1	collagen type XV alpha 1 chain [Source:VGNC Symbol;Acc:VGNC:86866]
ENSSSCG00000005380	Upregulated	18258	1	+	240717993	240829188	TCONS_00008980	38	4656	XLOC_002539	COL15A1	collagen type XV alpha 1 chain [Source:VGNC Symbol;Acc:VGNC:86866]
ENSSSCG00000005380	Upregulated	18259	1	+	240754822	240829178	TCONS_00008981	32	4538	XLOC_002539	COL15A1	collagen type XV alpha 1 chain [Source:VGNC Symbol;Acc:VGNC:86866]
ENSSSCG00000005380	Upregulated	18260	1	-	240779896	240814658	TCONS_00020172	23	1474	XLOC_005578	COL15A1	collagen type XV alpha 1 chain [Source:VGNC Symbol;Acc:VGNC:86866]
ENSSSCG00000005380	Upregulated	18261	1	-	240791398	240829147	TCONS_00020173	25	2801	XLOC_005578	COL15A1	collagen type XV alpha 1 chain [Source:VGNC Symbol;Acc:VGNC:86866]
ENSSSCG00000005380	Upregulated	18262	1	-	240791398	240829147	TCONS_00020174	26	2946	XLOC_005578	COL15A1	collagen type XV alpha 1 chain [Source:VGNC Symbol;Acc:VGNC:86866]
ENSSSCG00000005380	Upregulated	18263	1	+	240806232	240829079	TCONS_00008982	12	1868	XLOC_002539	COL15A1	collagen type XV alpha 1 chain [Source:VGNC Symbol;Acc:VGNC:86866]
ENSSSCG00000005380	Upregulated	18264	1	-	240814737	240829135	TCONS_00020175	8	1714	XLOC_005578	COL15A1	collagen type XV alpha 1 chain [Source:VGNC Symbol;Acc:VGNC:86866]
ENSSSCG00000005380	Upregulated	18265	1	-	240817858	240829147	TCONS_00020176	7	2221	XLOC_005578	COL15A1	collagen type XV alpha 1 chain [Source:VGNC Symbol;Acc:VGNC:86866]
ENSSSCG00000005380	Upregulated	18266	1	-	240818883	240829130	TCONS_00020177	7	1800	XLOC_005578	COL15A1	collagen type XV alpha 1 chain [Source:VGNC Symbol;Acc:VGNC:86866]
ENSSSCG00000005380	Upregulated	18267	1	-	240818883	240829130	TCONS_00020178	7	1800	XLOC_005578	COL15A1	collagen type XV alpha 1 chain [Source:VGNC Symbol;Acc:VGNC:86866]
ENSSSCG00000005380	Upregulated	18268	1	+	240819082	240829188	TCONS_00008983	7	1659	XLOC_002539	COL15A1	collagen type XV alpha 1 chain [Source:VGNC Symbol;Acc:VGNC:86866]
ENSSSCG00000005380	Upregulated	18269	1	+	240819970	240829188	TCONS_00008984	8	1665	XLOC_002539	COL15A1	collagen type XV alpha 1 chain [Source:VGNC Symbol;Acc:VGNC:86866]
ENSSSCG00000010755	Upregulated	197535	14	+	137101410	137261187	TCONS_00071208	20	4126	XLOC_019377	PTPRE	protein tyrosine phosphatase receptor type E [Source:VGNC Symbol;Acc:VGNC:91986]
ENSSSCG00000010755	Upregulated	197536	14	+	137101410	137264239	TCONS_00071209	20	5195	XLOC_019377	PTPRE	protein tyrosine phosphatase receptor type E [Source:VGNC Symbol;Acc:VGNC:91986]
ENSSSCG00000010755	Upregulated	197537	14	+	137101410	137264433	TCONS_00071210	21	5294	XLOC_019377	PTPRE	protein tyrosine phosphatase receptor type E [Source:VGNC Symbol;Acc:VGNC:91986]
ENSSSCG00000010755	Upregulated	197538	14	+	137101618	137264239	TCONS_00071211	21	5010	XLOC_019377	PTPRE	protein tyrosine phosphatase receptor type E [Source:VGNC Symbol;Acc:VGNC:91986]
ENSSSCG00000010755	Upregulated	197539	14	-	137101641	137264288	TCONS_00078666	18	4725	XLOC_021207	PTPRE	protein tyrosine phosphatase receptor type E [Source:VGNC Symbol;Acc:VGNC:91986]
ENSSSCG00000010755	Upregulated	197540	14	+	137184297	137262517	TCONS_00071212	17	3662	XLOC_019377	PTPRE	protein tyrosine phosphatase receptor type E [Source:VGNC Symbol;Acc:VGNC:91986]
ENSSSCG00000010755	Upregulated	197541	14	+	137184297	137264433	TCONS_00071213	18	5483	XLOC_019377	PTPRE	protein tyrosine phosphatase receptor type E [Source:VGNC Symbol;Acc:VGNC:91986]
ENSSSCG00000010755	Upregulated	197543	14	-	137225132	137253924	TCONS_00078668	15	1549	XLOC_021207	PTPRE	protein tyrosine phosphatase receptor type E [Source:VGNC Symbol;Acc:VGNC:91986]
ENSSSCG00000010755	Upregulated	197544	14	-	137225132	137264197	TCONS_00078669	17	4655	XLOC_021207	PTPRE	protein tyrosine phosphatase receptor type E [Source:VGNC Symbol;Acc:VGNC:91986]
ENSSSCG00000010755	Upregulated	197545	14	-	137225132	137264288	TCONS_00078670	19	4784	XLOC_021207	PTPRE	protein tyrosine phosphatase receptor type E [Source:VGNC Symbol;Acc:VGNC:91986]
ENSSSCG00000010755	Upregulated	197546	14	-	137225132	137264288	TCONS_00078671	19	4705	XLOC_021207	PTPRE	protein tyrosine phosphatase receptor type E [Source:VGNC Symbol;Acc:VGNC:91986]
ENSSSCG00000010755	Upregulated	197547	14	-	137225132	137264347	TCONS_00078672	18	4926	XLOC_021207	PTPRE	protein tyrosine phosphatase receptor type E [Source:VGNC Symbol;Acc:VGNC:91986]
ENSSSCG00000010755	Upregulated	197548	14	-	137225132	137264362	TCONS_00078673	19	4692	XLOC_021207	PTPRE	protein tyrosine phosphatase receptor type E [Source:VGNC Symbol;Acc:VGNC:91986]
ENSSSCG00000010755	Upregulated	197549	14	-	137225132	137264362	TCONS_00078674	19	4861	XLOC_021207	PTPRE	protein tyrosine phosphatase receptor type E [Source:VGNC Symbol;Acc:VGNC:91986]
ENSSSCG00000010755	Upregulated	197550	14	+	137225319	137261234	TCONS_00071214	18	3809	XLOC_019377	PTPRE	protein tyrosine phosphatase receptor type E [Source:VGNC Symbol;Acc:VGNC:91986]
ENSSSCG00000010755	Upregulated	197551	14	+	137225319	137261636	TCONS_00071215	19	2133	XLOC_019377	PTPRE	protein tyrosine phosphatase receptor type E [Source:VGNC Symbol;Acc:VGNC:91986]
ENSSSCG00000010755	Upregulated	197552	14	+	137225319	137264433	TCONS_00071216	19	4930	XLOC_019377	PTPRE	protein tyrosine phosphatase receptor type E [Source:VGNC Symbol;Acc:VGNC:91986]
ENSSSCG00000010755	Upregulated	197553	14	-	137225375	137264288	TCONS_00078675	19	4726	XLOC_021207	PTPRE	protein tyrosine phosphatase receptor type E [Source:VGNC Symbol;Acc:VGNC:91986]
ENSSSCG00000010755	Upregulated	197554	14	-	137225644	137264288	TCONS_00078676	18	4637	XLOC_021207	PTPRE	protein tyrosine phosphatase receptor type E [Source:VGNC Symbol;Acc:VGNC:91986]
ENSSSCG00000010755	Upregulated	197555	14	+	137225659	137264433	TCONS_00071217	17	4862	XLOC_019377	PTPRE	protein tyrosine phosphatase receptor type E [Source:VGNC Symbol;Acc:VGNC:91986]
ENSSSCG00000010755	Upregulated	197556	14	+	137229964	137264433	TCONS_00071218	16	4552	XLOC_019377	PTPRE	protein tyrosine phosphatase receptor type E [Source:VGNC Symbol;Acc:VGNC:91986]
ENSSSCG00000003509	Upregulated	96243	6	+	78954373	78962080	TCONS_00174640	7	3266	XLOC_047329	SH2D5	SH2 domain containing 5 [Source:VGNC Symbol;Acc:VGNC:92812]
ENSSSCG00000003509	Upregulated	96244	6	-	78954508	78958261	TCONS_00185271	4	2335	XLOC_050113	SH2D5	SH2 domain containing 5 [Source:VGNC Symbol;Acc:VGNC:92812]
ENSSSCG00000003509	Upregulated	96245	6	-	78954508	78961198	TCONS_00185272	8	3059	XLOC_050113	SH2D5	SH2 domain containing 5 [Source:VGNC Symbol;Acc:VGNC:92812]
ENSSSCG00000003509	Upregulated	96246	6	-	78954508	78962592	TCONS_00185273	9	3088	XLOC_050113	SH2D5	SH2 domain containing 5 [Source:VGNC Symbol;Acc:VGNC:92812]
ENSSSCG00000003509	Upregulated	96247	6	-	78954508	78964205	TCONS_00185274	11	3890	XLOC_050113	SH2D5	SH2 domain containing 5 [Source:VGNC Symbol;Acc:VGNC:92812]
ENSSSCG00000003509	Upregulated	96248	6	-	78954508	78965892	TCONS_00185275	11	3488	XLOC_050113	SH2D5	SH2 domain containing 5 [Source:VGNC Symbol;Acc:VGNC:92812]
ENSSSCG00000003509	Upregulated	96249	6	-	78954508	78967530	TCONS_00185276	11	3552	XLOC_050113	SH2D5	SH2 domain containing 5 [Source:VGNC Symbol;Acc:VGNC:92812]
ENSSSCG00000003509	Upregulated	96250	6	-	78954508	78967530	TCONS_00185277	11	3552	XLOC_050113	SH2D5	SH2 domain containing 5 [Source:VGNC Symbol;Acc:VGNC:92812]
ENSSSCG00000003509	Upregulated	96251	6	-	78954508	78967530	TCONS_00185278	11	3549	XLOC_050113	SH2D5	SH2 domain containing 5 [Source:VGNC Symbol;Acc:VGNC:92812]
ENSSSCG00000003509	Upregulated	96252	6	-	78954508	78967530	TCONS_00185279	11	3552	XLOC_050113	SH2D5	SH2 domain containing 5 [Source:VGNC Symbol;Acc:VGNC:92812]
ENSSSCG00000003509	Upregulated	96253	6	-	78954508	78967530	TCONS_00185280	11	3552	XLOC_050113	SH2D5	SH2 domain containing 5 [Source:VGNC Symbol;Acc:VGNC:92812]
ENSSSCG00000003509	Upregulated	96254	6	-	78954508	78967530	TCONS_00185281	11	3552	XLOC_050113	SH2D5	SH2 domain containing 5 [Source:VGNC Symbol;Acc:VGNC:92812]
ENSSSCG00000003509	Upregulated	96255	6	-	78954508	78967530	TCONS_00185282	11	3552	XLOC_050113	SH2D5	SH2 domain containing 5 [Source:VGNC Symbol;Acc:VGNC:92812]
ENSSSCG00000003509	Upregulated	96256	6	-	78954508	78967530	TCONS_00185283	11	3552	XLOC_050113	SH2D5	SH2 domain containing 5 [Source:VGNC Symbol;Acc:VGNC:92812]
ENSSSCG00000003509	Upregulated	96257	6	-	78954508	78967530	TCONS_00185284	10	3598	XLOC_050113	SH2D5	SH2 domain containing 5 [Source:VGNC Symbol;Acc:VGNC:92812]
ENSSSCG00000031003	Upregulated	234803	AEMK02000452.1	+	2070741	2073891	TCONS_00227877	8	1524	XLOC_062493	ENSSSCG00000031003
ENSSSCG00000031003	Upregulated	234804	AEMK02000452.1	+	2070741	2074082	TCONS_00227878	8	1500	XLOC_062493	ENSSSCG00000031003
ENSSSCG00000031003	Upregulated	234812	AEMK02000452.1	+	2071084	2071548	TCONS_00227879	1	465	XLOC_062493	ENSSSCG00000031003
ENSSSCG00000016290	Upregulated	207004	15	+	133120093	133169429	TCONS_00083264	4	2328	XLOC_022504	EFHD1	EF-hand domain family member D1 [Source:VGNC Symbol;Acc:VGNC:96222]
ENSSSCG00000016290	Upregulated	207005	15	-	133120462	133169361	TCONS_00088543	5	1579	XLOC_023978	EFHD1	EF-hand domain family member D1 [Source:VGNC Symbol;Acc:VGNC:96222]
ENSSSCG00000016290	Upregulated	207006	15	-	133120462	133169408	TCONS_00088544	4	1938	XLOC_023978	EFHD1	EF-hand domain family member D1 [Source:VGNC Symbol;Acc:VGNC:96222]
ENSSSCG00000032601	Upregulated	214365	17	-	13773157	13811545	TCONS_00098459	11	5697	XLOC_027033	RASSF2	Ras association domain family member 2 [Source:VGNC Symbol;Acc:VGNC:96531]
ENSSSCG00000032601	Upregulated	214366	17	-	13773157	13813865	TCONS_00098460	11	5592	XLOC_027033	RASSF2	Ras association domain family member 2 [Source:VGNC Symbol;Acc:VGNC:96531]
ENSSSCG00000032601	Upregulated	214367	17	-	13773157	13822208	TCONS_00098461	11	5732	XLOC_027033	RASSF2	Ras association domain family member 2 [Source:VGNC Symbol;Acc:VGNC:96531]
ENSSSCG00000032601	Upregulated	214368	17	-	13773157	13822208	TCONS_00098462	11	5732	XLOC_027033	RASSF2	Ras association domain family member 2 [Source:VGNC Symbol;Acc:VGNC:96531]
ENSSSCG00000032601	Upregulated	214369	17	-	13773157	13822208	TCONS_00098463	11	5723	XLOC_027033	RASSF2	Ras association domain family member 2 [Source:VGNC Symbol;Acc:VGNC:96531]
ENSSSCG00000032601	Upregulated	214370	17	-	13773157	13822208	TCONS_00098464	11	5732	XLOC_027033	RASSF2	Ras association domain family member 2 [Source:VGNC Symbol;Acc:VGNC:96531]
ENSSSCG00000032601	Upregulated	214371	17	-	13773157	13822208	TCONS_00098465	11	5732	XLOC_027033	RASSF2	Ras association domain family member 2 [Source:VGNC Symbol;Acc:VGNC:96531]
ENSSSCG00000032601	Upregulated	214372	17	-	13773157	13822208	TCONS_00098466	11	5732	XLOC_027033	RASSF2	Ras association domain family member 2 [Source:VGNC Symbol;Acc:VGNC:96531]
ENSSSCG00000032601	Upregulated	214373	17	-	13773157	13822208	TCONS_00098467	11	5732	XLOC_027033	RASSF2	Ras association domain family member 2 [Source:VGNC Symbol;Acc:VGNC:96531]
ENSSSCG00000032601	Upregulated	214374	17	-	13773292	13822206	TCONS_00098468	12	4225	XLOC_027033	RASSF2	Ras association domain family member 2 [Source:VGNC Symbol;Acc:VGNC:96531]
ENSSSCG00000032601	Upregulated	214375	17	+	13773299	13790027	TCONS_00094697	8	5192	XLOC_026018	RASSF2	Ras association domain family member 2 [Source:VGNC Symbol;Acc:VGNC:96531]
ENSSSCG00000032601	Upregulated	214376	17	+	13773299	13790027	TCONS_00094698	8	5192	XLOC_026018	RASSF2	Ras association domain family member 2 [Source:VGNC Symbol;Acc:VGNC:96531]
ENSSSCG00000032601	Upregulated	214377	17	+	13773299	13793074	TCONS_00094699	10	5366	XLOC_026018	RASSF2	Ras association domain family member 2 [Source:VGNC Symbol;Acc:VGNC:96531]
ENSSSCG00000032601	Upregulated	214378	17	+	13773299	13793231	TCONS_00094700	10	5406	XLOC_026018	RASSF2	Ras association domain family member 2 [Source:VGNC Symbol;Acc:VGNC:96531]
ENSSSCG00000032601	Upregulated	214379	17	+	13773299	13796187	TCONS_00094701	10	5372	XLOC_026018	RASSF2	Ras association domain family member 2 [Source:VGNC Symbol;Acc:VGNC:96531]
ENSSSCG00000032601	Upregulated	214380	17	+	13773299	13811478	TCONS_00094702	11	5488	XLOC_026018	RASSF2	Ras association domain family member 2 [Source:VGNC Symbol;Acc:VGNC:96531]
ENSSSCG00000032601	Upregulated	214381	17	+	13773299	13821133	TCONS_00094703	11	5480	XLOC_026018	RASSF2	Ras association domain family member 2 [Source:VGNC Symbol;Acc:VGNC:96531]
ENSSSCG00000032601	Upregulated	214382	17	+	13773299	13821627	TCONS_00094704	11	5502	XLOC_026018	RASSF2	Ras association domain family member 2 [Source:VGNC Symbol;Acc:VGNC:96531]
ENSSSCG00000032601	Upregulated	214383	17	+	13773299	13822107	TCONS_00094705	11	5489	XLOC_026018	RASSF2	Ras association domain family member 2 [Source:VGNC Symbol;Acc:VGNC:96531]
ENSSSCG00000032601	Upregulated	214384	17	-	13773360	13822208	TCONS_00098469	11	6591	XLOC_027033	RASSF2	Ras association domain family member 2 [Source:VGNC Symbol;Acc:VGNC:96531]
ENSSSCG00000030680	Upregulated	39577	2	+	136242910	136476062	TCONS_00115225	7	750	XLOC_031548	TCF7	transcription factor 7 [Source:VGNC Symbol;Acc:VGNC:96767]
ENSSSCG00000030680	Upregulated	39578	2	+	136247626	136476062	TCONS_00115226	7	1590	XLOC_031548	TCF7	transcription factor 7 [Source:VGNC Symbol;Acc:VGNC:96767]
ENSSSCG00000030680	Upregulated	39583	2	+	136286548	136469853	TCONS_00115227	6	1682	XLOC_031549	TCF7	transcription factor 7 [Source:VGNC Symbol;Acc:VGNC:96767]
ENSSSCG00000030680	Upregulated	39602	2	+	136334521	136476062	TCONS_00115233	7	5754	XLOC_031548	TCF7	transcription factor 7 [Source:VGNC Symbol;Acc:VGNC:96767]
ENSSSCG00000030680	Upregulated	39603	2	+	136422712	136456195	TCONS_00115234	11	4009	XLOC_031548	TCF7	transcription factor 7 [Source:VGNC Symbol;Acc:VGNC:96767]
ENSSSCG00000030680	Upregulated	39604	2	+	136422712	136458037	TCONS_00115235	11	5816	XLOC_031548	TCF7	transcription factor 7 [Source:VGNC Symbol;Acc:VGNC:96767]
ENSSSCG00000030680	Upregulated	39605	2	+	136422712	136458037	TCONS_00115236	11	5851	XLOC_031548	TCF7	transcription factor 7 [Source:VGNC Symbol;Acc:VGNC:96767]
ENSSSCG00000030680	Upregulated	39606	2	+	136422712	136476062	TCONS_00115237	16	8088	XLOC_031548	TCF7	transcription factor 7 [Source:VGNC Symbol;Acc:VGNC:96767]
ENSSSCG00000030680	Upregulated	39607	2	+	136422940	136453890	TCONS_00115238	11	1441	XLOC_031548	TCF7	transcription factor 7 [Source:VGNC Symbol;Acc:VGNC:96767]
ENSSSCG00000030680	Upregulated	39608	2	+	136422940	136458037	TCONS_00115239	10	5515	XLOC_031548	TCF7	transcription factor 7 [Source:VGNC Symbol;Acc:VGNC:96767]
ENSSSCG00000030680	Upregulated	39609	2	-	136423160	136456266	TCONS_00125279	9	3442	XLOC_034109	TCF7	transcription factor 7 [Source:VGNC Symbol;Acc:VGNC:96767]
ENSSSCG00000030680	Upregulated	39610	2	-	136423160	136456266	TCONS_00125280	10	3393	XLOC_034109	TCF7	transcription factor 7 [Source:VGNC Symbol;Acc:VGNC:96767]
ENSSSCG00000030680	Upregulated	39611	2	-	136423160	136457574	TCONS_00125281	10	4847	XLOC_034109	TCF7	transcription factor 7 [Source:VGNC Symbol;Acc:VGNC:96767]
ENSSSCG00000030680	Upregulated	39612	2	-	136423160	136457806	TCONS_00125282	10	5102	XLOC_034109	TCF7	transcription factor 7 [Source:VGNC Symbol;Acc:VGNC:96767]
ENSSSCG00000030680	Upregulated	39613	2	-	136423160	136457806	TCONS_00125283	12	5047	XLOC_034109	TCF7	transcription factor 7 [Source:VGNC Symbol;Acc:VGNC:96767]
ENSSSCG00000030680	Upregulated	39615	2	+	136425553	136455390	TCONS_00115240	6	5657	XLOC_031548	TCF7	transcription factor 7 [Source:VGNC Symbol;Acc:VGNC:96767]
ENSSSCG00000030680	Upregulated	39616	2	+	136425553	136458037	TCONS_00115241	6	8304	XLOC_031548	TCF7	transcription factor 7 [Source:VGNC Symbol;Acc:VGNC:96767]
ENSSSCG00000030680	Upregulated	39617	2	+	136427951	136454281	TCONS_00115242	8	1423	XLOC_031548	TCF7	transcription factor 7 [Source:VGNC Symbol;Acc:VGNC:96767]
ENSSSCG00000030680	Upregulated	39618	2	+	136427951	136458037	TCONS_00115243	9	5252	XLOC_031548	TCF7	transcription factor 7 [Source:VGNC Symbol;Acc:VGNC:96767]
ENSSSCG00000030680	Upregulated	39619	2	+	136427951	136476062	TCONS_00115244	13	7428	XLOC_031548	TCF7	transcription factor 7 [Source:VGNC Symbol;Acc:VGNC:96767]
ENSSSCG00000030680	Upregulated	39620	2	-	136448245	136456266	TCONS_00125285	6	3158	XLOC_034109	TCF7	transcription factor 7 [Source:VGNC Symbol;Acc:VGNC:96767]
ENSSSCG00000030680	Upregulated	39622	2	+	136448267	136456195	TCONS_00115245	6	3935	XLOC_031548	TCF7	transcription factor 7 [Source:VGNC Symbol;Acc:VGNC:96767]
ENSSSCG00000030680	Upregulated	39623	2	+	136448267	136458037	TCONS_00115246	6	5777	XLOC_031548	TCF7	transcription factor 7 [Source:VGNC Symbol;Acc:VGNC:96767]
ENSSSCG00000040359	Upregulated	194581	14	+	109024354	109217094	TCONS_00069690	2	620	XLOC_019016	GOLGA7B	golgin A7 family member B [Source:VGNC Symbol;Acc:VGNC:88553]
ENSSSCG00000040359	Upregulated	194603	14	+	109088784	109389451	TCONS_00069703	19	3137	XLOC_019023	GOLGA7B	golgin A7 family member B [Source:VGNC Symbol;Acc:VGNC:88553]
ENSSSCG00000040359	Upregulated	194605	14	+	109088820	109113012	TCONS_00069704	11	2774	XLOC_019023	GOLGA7B	golgin A7 family member B [Source:VGNC Symbol;Acc:VGNC:88553]
ENSSSCG00000040359	Upregulated	194607	14	+	109088820	109113012	TCONS_00069706	9	2516	XLOC_019023	GOLGA7B	golgin A7 family member B [Source:VGNC Symbol;Acc:VGNC:88553]
ENSSSCG00000040359	Upregulated	194608	14	+	109088820	109113012	TCONS_00069707	12	2870	XLOC_019023	GOLGA7B	golgin A7 family member B [Source:VGNC Symbol;Acc:VGNC:88553]
ENSSSCG00000040359	Upregulated	194610	14	+	109088820	109226782	TCONS_00069709	16	6303	XLOC_019023	GOLGA7B	golgin A7 family member B [Source:VGNC Symbol;Acc:VGNC:88553]
ENSSSCG00000040359	Upregulated	194611	14	+	109088820	109226782	TCONS_00069710	18	5198	XLOC_019023	GOLGA7B	golgin A7 family member B [Source:VGNC Symbol;Acc:VGNC:88553]
ENSSSCG00000040359	Upregulated	194616	14	+	109088844	109225153	TCONS_00069715	18	3545	XLOC_019023	GOLGA7B	golgin A7 family member B [Source:VGNC Symbol;Acc:VGNC:88553]
ENSSSCG00000040359	Upregulated	194617	14	+	109088844	109226782	TCONS_00069716	17	6659	XLOC_019023	GOLGA7B	golgin A7 family member B [Source:VGNC Symbol;Acc:VGNC:88553]
ENSSSCG00000040359	Upregulated	194622	14	+	109114557	109234022	TCONS_00069719	2	611	XLOC_019024	GOLGA7B	golgin A7 family member B [Source:VGNC Symbol;Acc:VGNC:88553]
ENSSSCG00000040359	Upregulated	194626	14	+	109159134	109226782	TCONS_00069722	4	4782	XLOC_019023	GOLGA7B	golgin A7 family member B [Source:VGNC Symbol;Acc:VGNC:88553]
ENSSSCG00000040359	Upregulated	194629	14	+	109213661	109226782	TCONS_00069723	6	3312	XLOC_019023	GOLGA7B	golgin A7 family member B [Source:VGNC Symbol;Acc:VGNC:88553]
ENSSSCG00000040359	Upregulated	194630	14	+	109213668	109226782	TCONS_00069724	6	3307	XLOC_019023	GOLGA7B	golgin A7 family member B [Source:VGNC Symbol;Acc:VGNC:88553]
ENSSSCG00000040359	Upregulated	194631	14	+	109213671	109375209	TCONS_00069725	6	1734	XLOC_019023	GOLGA7B	golgin A7 family member B [Source:VGNC Symbol;Acc:VGNC:88553]
ENSSSCG00000011732	Upregulated	175108	13	-	100079596	100133023	TCONS_00059997	25	9366	XLOC_016418	TRIM59	tripartite motif containing 59 [Source:VGNC Symbol;Acc:VGNC:101498]
ENSSSCG00000011732	Upregulated	175109	13	-	100080526	100132968	TCONS_00059998	24	9772	XLOC_016418	TRIM59	tripartite motif containing 59 [Source:VGNC Symbol;Acc:VGNC:101498]
ENSSSCG00000011732	Upregulated	175110	13	-	100081259	100132739	TCONS_00059999	23	8948	XLOC_016418	TRIM59	tripartite motif containing 59 [Source:VGNC Symbol;Acc:VGNC:101498]
ENSSSCG00000011732	Upregulated	175113	13	-	100084574	100132972	TCONS_00060000	22	8758	XLOC_016418	TRIM59	tripartite motif containing 59 [Source:VGNC Symbol;Acc:VGNC:101498]
ENSSSCG00000011732	Upregulated	175115	13	-	100118643	100132989	TCONS_00060001	3	3834	XLOC_016418	TRIM59	tripartite motif containing 59 [Source:VGNC Symbol;Acc:VGNC:101498]
ENSSSCG00000011732	Upregulated	175116	13	-	100118825	100124768	TCONS_00060002	2	5398	XLOC_016418	TRIM59	tripartite motif containing 59 [Source:VGNC Symbol;Acc:VGNC:101498]
ENSSSCG00000011732	Upregulated	175117	13	-	100118830	100132968	TCONS_00060003	3	4182	XLOC_016418	TRIM59	tripartite motif containing 59 [Source:VGNC Symbol;Acc:VGNC:101498]
ENSSSCG00000026784	Upregulated	34352	2	+	76016806	76163833	TCONS_00112757	2	2598	XLOC_030876	LMNB2	lamin B2 [Source:VGNC Symbol;Acc:VGNC:89761]
ENSSSCG00000026784	Upregulated	34368	2	+	76125774	76146733	TCONS_00112765	11	5539	XLOC_030883	LMNB2	lamin B2 [Source:VGNC Symbol;Acc:VGNC:89761]
ENSSSCG00000026784	Upregulated	34369	2	+	76125926	76146553	TCONS_00112766	11	5321	XLOC_030883	LMNB2	lamin B2 [Source:VGNC Symbol;Acc:VGNC:89761]
ENSSSCG00000026784	Upregulated	34370	2	+	76125926	76146557	TCONS_00112767	10	5472	XLOC_030883	LMNB2	lamin B2 [Source:VGNC Symbol;Acc:VGNC:89761]
ENSSSCG00000026784	Upregulated	34371	2	+	76125926	76146733	TCONS_00112768	10	5534	XLOC_030883	LMNB2	lamin B2 [Source:VGNC Symbol;Acc:VGNC:89761]
ENSSSCG00000026784	Upregulated	34372	2	+	76125926	76146733	TCONS_00112769	11	5033	XLOC_030883	LMNB2	lamin B2 [Source:VGNC Symbol;Acc:VGNC:89761]
ENSSSCG00000026784	Upregulated	34373	2	+	76125926	76146733	TCONS_00112770	10	5534	XLOC_030883	LMNB2	lamin B2 [Source:VGNC Symbol;Acc:VGNC:89761]
ENSSSCG00000026784	Upregulated	34374	2	+	76125926	76146733	TCONS_00112771	9	5397	XLOC_030883	LMNB2	lamin B2 [Source:VGNC Symbol;Acc:VGNC:89761]
ENSSSCG00000026784	Upregulated	34375	2	+	76125926	76146733	TCONS_00112772	12	4886	XLOC_030883	LMNB2	lamin B2 [Source:VGNC Symbol;Acc:VGNC:89761]
ENSSSCG00000026784	Upregulated	34376	2	+	76125926	76146733	TCONS_00112773	10	5381	XLOC_030883	LMNB2	lamin B2 [Source:VGNC Symbol;Acc:VGNC:89761]
ENSSSCG00000026784	Upregulated	34377	2	+	76125926	76146733	TCONS_00112774	9	6149	XLOC_030883	LMNB2	lamin B2 [Source:VGNC Symbol;Acc:VGNC:89761]
ENSSSCG00000026784	Upregulated	34378	2	+	76125926	76296615	TCONS_00112775	16	2712	XLOC_030883	LMNB2	lamin B2 [Source:VGNC Symbol;Acc:VGNC:89761]
ENSSSCG00000026784	Upregulated	34379	2	-	76126101	76146594	TCONS_00122536	12	4572	XLOC_033425	LMNB2	lamin B2 [Source:VGNC Symbol;Acc:VGNC:89761]
ENSSSCG00000026784	Upregulated	34380	2	-	76140783	76146523	TCONS_00122537	7	3777	XLOC_033425	LMNB2	lamin B2 [Source:VGNC Symbol;Acc:VGNC:89761]
ENSSSCG00000017317	Upregulated	156951	12	-	17628313	17635141	TCONS_00042251	2	3384	XLOC_011874	WNT3	Wnt family member 3 [Source:VGNC Symbol;Acc:VGNC:94970]
ENSSSCG00000017317	Upregulated	156952	12	-	17628313	17636594	TCONS_00042252	4	3455	XLOC_011874	WNT3	Wnt family member 3 [Source:VGNC Symbol;Acc:VGNC:94970]
ENSSSCG00000017317	Upregulated	156953	12	-	17628313	17637898	TCONS_00042253	4	3435	XLOC_011874	WNT3	Wnt family member 3 [Source:VGNC Symbol;Acc:VGNC:94970]
ENSSSCG00000017317	Upregulated	156954	12	-	17628313	17640655	TCONS_00042254	5	3559	XLOC_011874	WNT3	Wnt family member 3 [Source:VGNC Symbol;Acc:VGNC:94970]
ENSSSCG00000017317	Upregulated	156955	12	-	17628313	17642305	TCONS_00042255	5	3640	XLOC_011874	WNT3	Wnt family member 3 [Source:VGNC Symbol;Acc:VGNC:94970]
ENSSSCG00000017317	Upregulated	156956	12	-	17628313	17646031	TCONS_00042256	5	3560	XLOC_011874	WNT3	Wnt family member 3 [Source:VGNC Symbol;Acc:VGNC:94970]
ENSSSCG00000017317	Upregulated	156957	12	-	17628313	17646104	TCONS_00042257	5	3633	XLOC_011874	WNT3	Wnt family member 3 [Source:VGNC Symbol;Acc:VGNC:94970]
ENSSSCG00000017317	Upregulated	156958	12	-	17628313	17646498	TCONS_00042258	5	3531	XLOC_011874	WNT3	Wnt family member 3 [Source:VGNC Symbol;Acc:VGNC:94970]
ENSSSCG00000017317	Upregulated	156959	12	-	17628313	17648382	TCONS_00042259	5	3579	XLOC_011874	WNT3	Wnt family member 3 [Source:VGNC Symbol;Acc:VGNC:94970]
ENSSSCG00000017317	Upregulated	156960	12	-	17628313	17653846	TCONS_00042260	5	3560	XLOC_011874	WNT3	Wnt family member 3 [Source:VGNC Symbol;Acc:VGNC:94970]
ENSSSCG00000017317	Upregulated	156961	12	-	17628313	17660299	TCONS_00042261	5	3634	XLOC_011874	WNT3	Wnt family member 3 [Source:VGNC Symbol;Acc:VGNC:94970]
ENSSSCG00000017317	Upregulated	156962	12	-	17628313	17671103	TCONS_00042262	5	3528	XLOC_011874	WNT3	Wnt family member 3 [Source:VGNC Symbol;Acc:VGNC:94970]
ENSSSCG00000017317	Upregulated	156963	12	-	17628313	17683795	TCONS_00042263	6	3866	XLOC_011874	WNT3	Wnt family member 3 [Source:VGNC Symbol;Acc:VGNC:94970]
ENSSSCG00000017317	Upregulated	156964	12	-	17628313	17688757	TCONS_00042264	6	6961	XLOC_011874	WNT3	Wnt family member 3 [Source:VGNC Symbol;Acc:VGNC:94970]
ENSSSCG00000017317	Upregulated	156965	12	-	17628313	17688840	TCONS_00042265	8	6003	XLOC_011874	WNT3	Wnt family member 3 [Source:VGNC Symbol;Acc:VGNC:94970]
ENSSSCG00000017317	Upregulated	156966	12	-	17628313	17688840	TCONS_00042266	8	6003	XLOC_011874	WNT3	Wnt family member 3 [Source:VGNC Symbol;Acc:VGNC:94970]
ENSSSCG00000017317	Upregulated	156967	12	+	17628363	17635542	TCONS_00036147	3	3087	XLOC_010441	WNT3	Wnt family member 3 [Source:VGNC Symbol;Acc:VGNC:94970]
ENSSSCG00000017317	Upregulated	156968	12	+	17628478	17646541	TCONS_00036148	6	2852	XLOC_010441	WNT3	Wnt family member 3 [Source:VGNC Symbol;Acc:VGNC:94970]
ENSSSCG00000017317	Upregulated	156969	12	-	17628726	17681572	TCONS_00042267	5	3869	XLOC_011874	WNT3	Wnt family member 3 [Source:VGNC Symbol;Acc:VGNC:94970]
ENSSSCG00000017317	Upregulated	156970	12	+	17631063	17631635	TCONS_00036149	1	573	XLOC_010442	WNT3	Wnt family member 3 [Source:VGNC Symbol;Acc:VGNC:94970]
ENSSSCG00000017317	Upregulated	156971	12	+	17632188	17633097	TCONS_00036150	1	910	XLOC_010443	WNT3	Wnt family member 3 [Source:VGNC Symbol;Acc:VGNC:94970]
ENSSSCG00000017317	Upregulated	156972	12	+	17635932	17636202	TCONS_00036151	1	271	XLOC_010444	WNT3	Wnt family member 3 [Source:VGNC Symbol;Acc:VGNC:94970]
ENSSSCG00000017317	Upregulated	156974	12	+	17637956	17638328	TCONS_00036152	1	373	XLOC_010445	WNT3	Wnt family member 3 [Source:VGNC Symbol;Acc:VGNC:94970]
ENSSSCG00000017317	Upregulated	156975	12	+	17638426	17638903	TCONS_00036153	1	478	XLOC_010446	WNT3	Wnt family member 3 [Source:VGNC Symbol;Acc:VGNC:94970]
ENSSSCG00000015301	Upregulated	136223	9	-	70284500	70295173	TCONS_00223266	5	911	XLOC_060730	STEAP1	STEAP family member 1 [Source:NCBI gene (formerly Entrezgene);Acc:397573]
ENSSSCG00000015301	Upregulated	136224	9	-	70284500	70295569	TCONS_00223267	4	1000	XLOC_060730	STEAP1	STEAP family member 1 [Source:NCBI gene (formerly Entrezgene);Acc:397573]
ENSSSCG00000015301	Upregulated	136225	9	-	70284500	70295599	TCONS_00223268	4	629	XLOC_060730	STEAP1	STEAP family member 1 [Source:NCBI gene (formerly Entrezgene);Acc:397573]
ENSSSCG00000015301	Upregulated	136226	9	-	70284500	70295650	TCONS_00223269	5	1193	XLOC_060730	STEAP1	STEAP family member 1 [Source:NCBI gene (formerly Entrezgene);Acc:397573]
ENSSSCG00000015301	Upregulated	136227	9	+	70284512	70295689	TCONS_00217205	5	1220	XLOC_058950	STEAP1	STEAP family member 1 [Source:NCBI gene (formerly Entrezgene);Acc:397573]
ENSSSCG00000015301	Upregulated	136228	9	+	70284512	70295697	TCONS_00217206	5	1228	XLOC_058950	STEAP1	STEAP family member 1 [Source:NCBI gene (formerly Entrezgene);Acc:397573]
ENSSSCG00000015301	Upregulated	136229	9	-	70284590	70295545	TCONS_00223270	5	998	XLOC_060730	STEAP1	STEAP family member 1 [Source:NCBI gene (formerly Entrezgene);Acc:397573]
ENSSSCG00000034883	Upregulated	69888	4	+	110620039	110623365	TCONS_00148677	3	2489	XLOC_040357	AMIGO1	adhesion molecule with Ig like domain 1 [Source:VGNC Symbol;Acc:VGNC:85280]
ENSSSCG00000034883	Upregulated	69889	4	+	110620039	110631889	TCONS_00148678	3	7847	XLOC_040357	AMIGO1	adhesion molecule with Ig like domain 1 [Source:VGNC Symbol;Acc:VGNC:85280]
ENSSSCG00000034883	Upregulated	69890	4	+	110620039	110631889	TCONS_00148679	2	11408	XLOC_040357	AMIGO1	adhesion molecule with Ig like domain 1 [Source:VGNC Symbol;Acc:VGNC:85280]
ENSSSCG00000034883	Upregulated	69893	4	+	110620746	110628833	TCONS_00148680	3	4084	XLOC_040357	AMIGO1	adhesion molecule with Ig like domain 1 [Source:VGNC Symbol;Acc:VGNC:85280]
ENSSSCG00000022945	Upregulated	121948	8	+	32353246	32367322	TCONS_00205324	9	1549	XLOC_055514	UCHL1	ubiquitin C-terminal hydrolase L1 [Source:VGNC Symbol;Acc:VGNC:94680]
ENSSSCG00000022945	Upregulated	121949	8	+	32353246	32367322	TCONS_00205325	8	1501	XLOC_055514	UCHL1	ubiquitin C-terminal hydrolase L1 [Source:VGNC Symbol;Acc:VGNC:94680]
ENSSSCG00000022945	Upregulated	121950	8	-	32353693	32362385	TCONS_00209941	8	624	XLOC_056879	UCHL1	ubiquitin C-terminal hydrolase L1 [Source:VGNC Symbol;Acc:VGNC:94680]
ENSSSCG00000022945	Upregulated	121951	8	-	32353693	32365263	TCONS_00209942	9	796	XLOC_056879	UCHL1	ubiquitin C-terminal hydrolase L1 [Source:VGNC Symbol;Acc:VGNC:94680]
ENSSSCG00000022945	Upregulated	121952	8	-	32353693	32367462	TCONS_00209943	9	1242	XLOC_056879	UCHL1	ubiquitin C-terminal hydrolase L1 [Source:VGNC Symbol;Acc:VGNC:94680]
ENSSSCG00000022945	Upregulated	121953	8	+	32353717	32367323	TCONS_00205326	8	1067	XLOC_055514	UCHL1	ubiquitin C-terminal hydrolase L1 [Source:VGNC Symbol;Acc:VGNC:94680]
ENSSSCG00000022945	Upregulated	121954	8	+	32353951	32367335	TCONS_00205327	8	975	XLOC_055514	UCHL1	ubiquitin C-terminal hydrolase L1 [Source:VGNC Symbol;Acc:VGNC:94680]
ENSSSCG00000022945	Upregulated	121955	8	-	32354346	32367462	TCONS_00209944	7	1014	XLOC_056879	UCHL1	ubiquitin C-terminal hydrolase L1 [Source:VGNC Symbol;Acc:VGNC:94680]
ENSSSCG00000022945	Upregulated	121956	8	+	32365180	32367335	TCONS_00205328	2	501	XLOC_055514	UCHL1	ubiquitin C-terminal hydrolase L1 [Source:VGNC Symbol;Acc:VGNC:94680]
ENSSSCG00000028559	Upregulated	183362	14	-	4289328	4394290	TCONS_00071640	15	2105	XLOC_019505	LZTS1	leucine zipper tumor suppressor 1 [Source:VGNC Symbol;Acc:VGNC:89928]
ENSSSCG00000028559	Upregulated	183373	14	+	4344482	4404133	TCONS_00064086	4	5110	XLOC_017687	LZTS1	leucine zipper tumor suppressor 1 [Source:VGNC Symbol;Acc:VGNC:89928]
ENSSSCG00000028559	Upregulated	183374	14	-	4344496	4349049	TCONS_00071643	4	3104	XLOC_019507	LZTS1	leucine zipper tumor suppressor 1 [Source:VGNC Symbol;Acc:VGNC:89928]
ENSSSCG00000028559	Upregulated	183375	14	-	4344496	4404171	TCONS_00071644	6	4186	XLOC_019507	LZTS1	leucine zipper tumor suppressor 1 [Source:VGNC Symbol;Acc:VGNC:89928]
ENSSSCG00000028559	Upregulated	183376	14	-	4344496	4404208	TCONS_00071645	5	4982	XLOC_019507	LZTS1	leucine zipper tumor suppressor 1 [Source:VGNC Symbol;Acc:VGNC:89928]
ENSSSCG00000028559	Upregulated	183377	14	-	4344496	4404208	TCONS_00071646	6	4577	XLOC_019507	LZTS1	leucine zipper tumor suppressor 1 [Source:VGNC Symbol;Acc:VGNC:89928]
ENSSSCG00000028559	Upregulated	183378	14	-	4344496	4404208	TCONS_00071647	7	4034	XLOC_019507	LZTS1	leucine zipper tumor suppressor 1 [Source:VGNC Symbol;Acc:VGNC:89928]
ENSSSCG00000028559	Upregulated	183379	14	-	4344496	4404208	TCONS_00071648	7	4385	XLOC_019507	LZTS1	leucine zipper tumor suppressor 1 [Source:VGNC Symbol;Acc:VGNC:89928]
ENSSSCG00000028559	Upregulated	183380	14	+	4344594	4347760	TCONS_00064087	2	2762	XLOC_017687	LZTS1	leucine zipper tumor suppressor 1 [Source:VGNC Symbol;Acc:VGNC:89928]
ENSSSCG00000028559	Upregulated	183381	14	-	4347481	4404208	TCONS_00071649	5	1997	XLOC_019507	LZTS1	leucine zipper tumor suppressor 1 [Source:VGNC Symbol;Acc:VGNC:89928]
ENSSSCG00000046312	Upregulated	109506	7	-	27127571	27131057	TCONS_00199037	3	1549	XLOC_053846	ENSSSCG00000046312
ENSSSCG00000046312	Upregulated	109507	7	-	27127571	27134500	TCONS_00199038	2	5561	XLOC_053846	ENSSSCG00000046312
ENSSSCG00000046312	Upregulated	109508	7	-	27127571	27134500	TCONS_00199039	2	5622	XLOC_053846	ENSSSCG00000046312
ENSSSCG00000046312	Upregulated	109509	7	-	27127571	27134500	TCONS_00199040	3	2808	XLOC_053846	ENSSSCG00000046312
ENSSSCG00000046312	Upregulated	109510	7	-	27127571	27134500	TCONS_00199041	3	2808	XLOC_053846	ENSSSCG00000046312
ENSSSCG00000046312	Upregulated	109511	7	-	27127571	27137753	TCONS_00199042	3	1740	XLOC_053846	ENSSSCG00000046312
ENSSSCG00000046312	Upregulated	109512	7	-	27127571	27137757	TCONS_00199043	5	1926	XLOC_053846	ENSSSCG00000046312
ENSSSCG00000046312	Upregulated	109513	7	-	27127571	27137974	TCONS_00199044	4	1737	XLOC_053846	ENSSSCG00000046312
ENSSSCG00000046312	Upregulated	109514	7	-	27127571	27207293	TCONS_00199045	4	4752	XLOC_053846	ENSSSCG00000046312
ENSSSCG00000046312	Upregulated	109515	7	+	27127649	27133834	TCONS_00192014	3	2064	XLOC_051920	ENSSSCG00000046312
ENSSSCG00000046312	Upregulated	109516	7	+	27127649	27133834	TCONS_00192015	3	2027	XLOC_051920	ENSSSCG00000046312
ENSSSCG00000046312	Upregulated	109517	7	+	27127649	27133834	TCONS_00192016	3	2088	XLOC_051920	ENSSSCG00000046312
ENSSSCG00000046312	Upregulated	109518	7	+	27127649	27137796	TCONS_00192017	3	1705	XLOC_051920	ENSSSCG00000046312
ENSSSCG00000046312	Upregulated	109519	7	+	27127649	27138073	TCONS_00192018	4	1773	XLOC_051920	ENSSSCG00000046312
ENSSSCG00000046312	Upregulated	109520	7	+	27127695	27133834	TCONS_00192019	3	4655	XLOC_051920	ENSSSCG00000046312
ENSSSCG00000046312	Upregulated	109521	7	+	27127727	27133834	TCONS_00192020	3	4599	XLOC_051920	ENSSSCG00000046312
ENSSSCG00000046312	Upregulated	109522	7	+	27127727	27137796	TCONS_00192021	3	4240	XLOC_051920	ENSSSCG00000046312
ENSSSCG00000046312	Upregulated	109523	7	+	27127837	27133834	TCONS_00192022	4	3186	XLOC_051920	ENSSSCG00000046312
ENSSSCG00000046312	Upregulated	109524	7	+	27128143	27133834	TCONS_00192023	2	4323	XLOC_051920	ENSSSCG00000046312
ENSSSCG00000046312	Upregulated	109525	7	-	27128259	27134500	TCONS_00199046	3	2144	XLOC_053846	ENSSSCG00000046312
ENSSSCG00000046312	Upregulated	109526	7	+	27128275	27133834	TCONS_00192024	2	1186	XLOC_051920	ENSSSCG00000046312
ENSSSCG00000046312	Upregulated	109527	7	-	27131939	27207293	TCONS_00199047	4	384	XLOC_053846	ENSSSCG00000046312
ENSSSCG00000015937	Upregulated	202242	15	+	76029179	76052549	TCONS_00080898	4	4540	XLOC_021923	KLHL23	kelch like family member 23 [Source:VGNC Symbol;Acc:VGNC:96158]
ENSSSCG00000015937	Upregulated	202243	15	+	76029563	76051734	TCONS_00080899	5	2004	XLOC_021923	KLHL23	kelch like family member 23 [Source:VGNC Symbol;Acc:VGNC:96158]
ENSSSCG00000015937	Upregulated	202244	15	+	76029563	76052549	TCONS_00080900	5	2819	XLOC_021923	KLHL23	kelch like family member 23 [Source:VGNC Symbol;Acc:VGNC:96158]
ENSSSCG00000015937	Upregulated	202245	15	+	76029563	76052549	TCONS_00080901	3	3421	XLOC_021923	KLHL23	kelch like family member 23 [Source:VGNC Symbol;Acc:VGNC:96158]
ENSSSCG00000015937	Upregulated	202246	15	+	76029563	76052549	TCONS_00080902	4	4636	XLOC_021923	KLHL23	kelch like family member 23 [Source:VGNC Symbol;Acc:VGNC:96158]
ENSSSCG00000015937	Upregulated	202247	15	+	76029563	76057785	TCONS_00080903	5	3910	XLOC_021923	KLHL23	kelch like family member 23 [Source:VGNC Symbol;Acc:VGNC:96158]
ENSSSCG00000015937	Upregulated	202248	15	-	76029804	76051785	TCONS_00086156	4	3631	XLOC_023350	KLHL23	kelch like family member 23 [Source:VGNC Symbol;Acc:VGNC:96158]
ENSSSCG00000015550	Upregulated	139799	9	-	123913172	123915535	TCONS_00225099	2	1841	XLOC_061215	RGS16	regulator of G protein signaling 16 [Source:VGNC Symbol;Acc:VGNC:92262]
ENSSSCG00000015550	Upregulated	139800	9	-	123913172	123918871	TCONS_00225100	5	2430	XLOC_061215	RGS16	regulator of G protein signaling 16 [Source:VGNC Symbol;Acc:VGNC:92262]
ENSSSCG00000015550	Upregulated	139802	9	-	123913179	123938559	TCONS_00225102	6	2548	XLOC_061215	RGS16	regulator of G protein signaling 16 [Source:VGNC Symbol;Acc:VGNC:92262]
ENSSSCG00000015550	Upregulated	139803	9	-	123913184	123956800	TCONS_00225103	5	2769	XLOC_061215	RGS16	regulator of G protein signaling 16 [Source:VGNC Symbol;Acc:VGNC:92262]
ENSSSCG00000015550	Upregulated	139804	9	+	123913189	123918951	TCONS_00218940	5	2493	XLOC_059436	RGS16	regulator of G protein signaling 16 [Source:VGNC Symbol;Acc:VGNC:92262]
ENSSSCG00000015550	Upregulated	139806	9	+	123913253	123918951	TCONS_00218942	6	1840	XLOC_059436	RGS16	regulator of G protein signaling 16 [Source:VGNC Symbol;Acc:VGNC:92262]
ENSSSCG00000009181	Upregulated	127746	8	-	120918176	120995570	TCONS_00212922	13	4364	XLOC_057755	C4orf17	chromosome 8 C4orf17 homolog [Source:VGNC Symbol;Acc:VGNC:86079]
ENSSSCG00000009181	Upregulated	127747	8	-	120918176	121143942	TCONS_00212923	16	2630	XLOC_057755	C4orf17	chromosome 8 C4orf17 homolog [Source:VGNC Symbol;Acc:VGNC:86079]
ENSSSCG00000009181	Upregulated	127748	8	-	120918344	121266652	TCONS_00212924	17	2355	XLOC_057755	C4orf17	chromosome 8 C4orf17 homolog [Source:VGNC Symbol;Acc:VGNC:86079]
ENSSSCG00000009181	Upregulated	127752	8	-	121025034	121146907	TCONS_00212925	7	869	XLOC_057755	C4orf17	chromosome 8 C4orf17 homolog [Source:VGNC Symbol;Acc:VGNC:86079]
ENSSSCG00000009181	Upregulated	127764	8	-	121133364	121146898	TCONS_00212930	8	1018	XLOC_057755	C4orf17	chromosome 8 C4orf17 homolog [Source:VGNC Symbol;Acc:VGNC:86079]
ENSSSCG00000009181	Upregulated	127765	8	-	121133364	121146906	TCONS_00212931	8	1071	XLOC_057755	C4orf17	chromosome 8 C4orf17 homolog [Source:VGNC Symbol;Acc:VGNC:86079]
ENSSSCG00000009181	Upregulated	127766	8	-	121133364	121146908	TCONS_00212932	8	1100	XLOC_057755	C4orf17	chromosome 8 C4orf17 homolog [Source:VGNC Symbol;Acc:VGNC:86079]
ENSSSCG00000009181	Upregulated	127767	8	-	121133364	121146909	TCONS_00212933	8	1143	XLOC_057755	C4orf17	chromosome 8 C4orf17 homolog [Source:VGNC Symbol;Acc:VGNC:86079]
ENSSSCG00000009181	Upregulated	127768	8	-	121133364	121147690	TCONS_00212934	9	1221	XLOC_057755	C4orf17	chromosome 8 C4orf17 homolog [Source:VGNC Symbol;Acc:VGNC:86079]
ENSSSCG00000009181	Upregulated	127769	8	-	121133364	121147973	TCONS_00212935	10	1324	XLOC_057755	C4orf17	chromosome 8 C4orf17 homolog [Source:VGNC Symbol;Acc:VGNC:86079]
ENSSSCG00000009181	Upregulated	127770	8	-	121133364	121147980	TCONS_00212936	10	1289	XLOC_057755	C4orf17	chromosome 8 C4orf17 homolog [Source:VGNC Symbol;Acc:VGNC:86079]
ENSSSCG00000009181	Upregulated	127771	8	-	121133364	121148073	TCONS_00212937	9	1272	XLOC_057755	C4orf17	chromosome 8 C4orf17 homolog [Source:VGNC Symbol;Acc:VGNC:86079]
ENSSSCG00000009181	Upregulated	127772	8	-	121133364	121148082	TCONS_00212938	9	1215	XLOC_057755	C4orf17	chromosome 8 C4orf17 homolog [Source:VGNC Symbol;Acc:VGNC:86079]
ENSSSCG00000009181	Upregulated	127773	8	-	121133364	121148129	TCONS_00212939	9	1331	XLOC_057755	C4orf17	chromosome 8 C4orf17 homolog [Source:VGNC Symbol;Acc:VGNC:86079]
ENSSSCG00000009181	Upregulated	127774	8	-	121133364	121150185	TCONS_00212940	9	3204	XLOC_057755	C4orf17	chromosome 8 C4orf17 homolog [Source:VGNC Symbol;Acc:VGNC:86079]
ENSSSCG00000009181	Upregulated	127775	8	-	121133364	121154458	TCONS_00212941	10	1456	XLOC_057755	C4orf17	chromosome 8 C4orf17 homolog [Source:VGNC Symbol;Acc:VGNC:86079]
ENSSSCG00000009181	Upregulated	127776	8	-	121133364	121159433	TCONS_00212942	10	1584	XLOC_057755	C4orf17	chromosome 8 C4orf17 homolog [Source:VGNC Symbol;Acc:VGNC:86079]
ENSSSCG00000009181	Upregulated	127777	8	-	121133364	121159433	TCONS_00212943	11	1788	XLOC_057755	C4orf17	chromosome 8 C4orf17 homolog [Source:VGNC Symbol;Acc:VGNC:86079]
ENSSSCG00000009181	Upregulated	127778	8	-	121133364	121159433	TCONS_00212944	10	1575	XLOC_057755	C4orf17	chromosome 8 C4orf17 homolog [Source:VGNC Symbol;Acc:VGNC:86079]
ENSSSCG00000009181	Upregulated	127779	8	-	121133364	121159433	TCONS_00212945	11	4290	XLOC_057755	C4orf17	chromosome 8 C4orf17 homolog [Source:VGNC Symbol;Acc:VGNC:86079]
ENSSSCG00000009181	Upregulated	127780	8	-	121133364	121159433	TCONS_00212946	10	4326	XLOC_057755	C4orf17	chromosome 8 C4orf17 homolog [Source:VGNC Symbol;Acc:VGNC:86079]
ENSSSCG00000009181	Upregulated	127781	8	-	121133364	121159435	TCONS_00212947	11	4292	XLOC_057755	C4orf17	chromosome 8 C4orf17 homolog [Source:VGNC Symbol;Acc:VGNC:86079]
ENSSSCG00000009181	Upregulated	127782	8	-	121133364	121266652	TCONS_00212948	7	749	XLOC_057755	C4orf17	chromosome 8 C4orf17 homolog [Source:VGNC Symbol;Acc:VGNC:86079]
ENSSSCG00000009181	Upregulated	127783	8	-	121133364	121343102	TCONS_00212949	10	3253	XLOC_057755	C4orf17	chromosome 8 C4orf17 homolog [Source:VGNC Symbol;Acc:VGNC:86079]
ENSSSCG00000009181	Upregulated	127787	8	-	121133557	121217778	TCONS_00212950	10	3166	XLOC_057755	C4orf17	chromosome 8 C4orf17 homolog [Source:VGNC Symbol;Acc:VGNC:86079]
ENSSSCG00000001559	Upregulated	110287	7	-	31987847	32024776	TCONS_00199429	5	2765	XLOC_053913	PNPLA1	patatin like phospholipase domain containing 1 [Source:VGNC Symbol;Acc:VGNC:91606]
ENSSSCG00000001559	Upregulated	110288	7	-	31987847	32024801	TCONS_00199430	7	2869	XLOC_053913	PNPLA1	patatin like phospholipase domain containing 1 [Source:VGNC Symbol;Acc:VGNC:91606]
ENSSSCG00000001559	Upregulated	110289	7	-	31987847	32025108	TCONS_00199431	7	3225	XLOC_053913	PNPLA1	patatin like phospholipase domain containing 1 [Source:VGNC Symbol;Acc:VGNC:91606]
ENSSSCG00000001559	Upregulated	110290	7	-	31987847	32025127	TCONS_00199432	7	2508	XLOC_053913	PNPLA1	patatin like phospholipase domain containing 1 [Source:VGNC Symbol;Acc:VGNC:91606]
ENSSSCG00000001559	Upregulated	110291	7	-	31987847	32032416	TCONS_00199433	9	3398	XLOC_053913	PNPLA1	patatin like phospholipase domain containing 1 [Source:VGNC Symbol;Acc:VGNC:91606]
ENSSSCG00000001559	Upregulated	110292	7	-	31987847	32032462	TCONS_00199434	7	1786	XLOC_053913	PNPLA1	patatin like phospholipase domain containing 1 [Source:VGNC Symbol;Acc:VGNC:91606]
ENSSSCG00000001559	Upregulated	110293	7	-	31987847	32032470	TCONS_00199435	7	1944	XLOC_053913	PNPLA1	patatin like phospholipase domain containing 1 [Source:VGNC Symbol;Acc:VGNC:91606]
ENSSSCG00000001559	Upregulated	110294	7	-	31987847	32032479	TCONS_00199436	8	2240	XLOC_053913	PNPLA1	patatin like phospholipase domain containing 1 [Source:VGNC Symbol;Acc:VGNC:91606]
ENSSSCG00000001559	Upregulated	110295	7	-	31987847	32032490	TCONS_00199437	7	1809	XLOC_053913	PNPLA1	patatin like phospholipase domain containing 1 [Source:VGNC Symbol;Acc:VGNC:91606]
ENSSSCG00000001559	Upregulated	110296	7	-	31987847	32032585	TCONS_00199438	7	2281	XLOC_053913	PNPLA1	patatin like phospholipase domain containing 1 [Source:VGNC Symbol;Acc:VGNC:91606]
ENSSSCG00000001559	Upregulated	110297	7	-	31987847	32032594	TCONS_00199439	7	2905	XLOC_053913	PNPLA1	patatin like phospholipase domain containing 1 [Source:VGNC Symbol;Acc:VGNC:91606]
ENSSSCG00000001559	Upregulated	110298	7	-	31987847	32032647	TCONS_00199440	6	1888	XLOC_053913	PNPLA1	patatin like phospholipase domain containing 1 [Source:VGNC Symbol;Acc:VGNC:91606]
ENSSSCG00000001559	Upregulated	110299	7	-	31987847	32032732	TCONS_00199441	7	3795	XLOC_053913	PNPLA1	patatin like phospholipase domain containing 1 [Source:VGNC Symbol;Acc:VGNC:91606]
ENSSSCG00000001559	Upregulated	110300	7	-	31987847	32032873	TCONS_00199442	7	2347	XLOC_053913	PNPLA1	patatin like phospholipase domain containing 1 [Source:VGNC Symbol;Acc:VGNC:91606]
ENSSSCG00000001559	Upregulated	110301	7	+	31987906	32032991	TCONS_00192401	8	2296	XLOC_051987	PNPLA1	patatin like phospholipase domain containing 1 [Source:VGNC Symbol;Acc:VGNC:91606]
ENSSSCG00000001559	Upregulated	110302	7	+	31987930	32025318	TCONS_00192402	8	2842	XLOC_051987	PNPLA1	patatin like phospholipase domain containing 1 [Source:VGNC Symbol;Acc:VGNC:91606]
ENSSSCG00000001559	Upregulated	110303	7	+	31987930	32032991	TCONS_00192403	7	3219	XLOC_051987	PNPLA1	patatin like phospholipase domain containing 1 [Source:VGNC Symbol;Acc:VGNC:91606]
ENSSSCG00000001559	Upregulated	110304	7	+	31987930	32032991	TCONS_00192404	7	2604	XLOC_051987	PNPLA1	patatin like phospholipase domain containing 1 [Source:VGNC Symbol;Acc:VGNC:91606]
ENSSSCG00000001559	Upregulated	110305	7	+	31987930	32032991	TCONS_00192405	4	2022	XLOC_051987	PNPLA1	patatin like phospholipase domain containing 1 [Source:VGNC Symbol;Acc:VGNC:91606]
ENSSSCG00000001559	Upregulated	110306	7	+	31987930	32032991	TCONS_00192406	7	2608	XLOC_051987	PNPLA1	patatin like phospholipase domain containing 1 [Source:VGNC Symbol;Acc:VGNC:91606]
ENSSSCG00000001559	Upregulated	110307	7	+	31987930	32032991	TCONS_00192407	7	3024	XLOC_051987	PNPLA1	patatin like phospholipase domain containing 1 [Source:VGNC Symbol;Acc:VGNC:91606]
ENSSSCG00000001559	Upregulated	110308	7	+	31987930	32197273	TCONS_00192408	7	6566	XLOC_051987	PNPLA1	patatin like phospholipase domain containing 1 [Source:VGNC Symbol;Acc:VGNC:91606]
ENSSSCG00000001559	Upregulated	110309	7	+	31988331	32032991	TCONS_00192409	8	2268	XLOC_051987	PNPLA1	patatin like phospholipase domain containing 1 [Source:VGNC Symbol;Acc:VGNC:91606]
ENSSSCG00000001559	Upregulated	110310	7	+	31988331	32032991	TCONS_00192410	8	2879	XLOC_051987	PNPLA1	patatin like phospholipase domain containing 1 [Source:VGNC Symbol;Acc:VGNC:91606]
ENSSSCG00000001559	Upregulated	110311	7	+	31988392	32032991	TCONS_00192411	6	1854	XLOC_051987	PNPLA1	patatin like phospholipase domain containing 1 [Source:VGNC Symbol;Acc:VGNC:91606]
ENSSSCG00000001559	Upregulated	110312	7	+	31988396	32025245	TCONS_00192412	8	1506	XLOC_051987	PNPLA1	patatin like phospholipase domain containing 1 [Source:VGNC Symbol;Acc:VGNC:91606]
ENSSSCG00000001559	Upregulated	110313	7	+	32008887	32032991	TCONS_00192413	7	1680	XLOC_051987	PNPLA1	patatin like phospholipase domain containing 1 [Source:VGNC Symbol;Acc:VGNC:91606]
ENSSSCG00000001559	Upregulated	110314	7	+	32009502	32032991	TCONS_00192414	8	1701	XLOC_051987	PNPLA1	patatin like phospholipase domain containing 1 [Source:VGNC Symbol;Acc:VGNC:91606]
ENSSSCG00000001559	Upregulated	110315	7	+	32009537	32032991	TCONS_00192415	7	1755	XLOC_051987	PNPLA1	patatin like phospholipase domain containing 1 [Source:VGNC Symbol;Acc:VGNC:91606]
ENSSSCG00000001559	Upregulated	110316	7	+	32009544	32032991	TCONS_00192416	7	1970	XLOC_051987	PNPLA1	patatin like phospholipase domain containing 1 [Source:VGNC Symbol;Acc:VGNC:91606]
ENSSSCG00000001559	Upregulated	110317	7	-	32013840	32032477	TCONS_00199443	7	906	XLOC_053913	PNPLA1	patatin like phospholipase domain containing 1 [Source:VGNC Symbol;Acc:VGNC:91606]
ENSSSCG00000001559	Upregulated	110318	7	+	32020573	32032991	TCONS_00192417	4	1318	XLOC_051987	PNPLA1	patatin like phospholipase domain containing 1 [Source:VGNC Symbol;Acc:VGNC:91606]
ENSSSCG00000001559	Upregulated	110319	7	+	32020595	32032991	TCONS_00192418	3	1235	XLOC_051987	PNPLA1	patatin like phospholipase domain containing 1 [Source:VGNC Symbol;Acc:VGNC:91606]
ENSSSCG00000001559	Upregulated	110320	7	-	32020653	32032496	TCONS_00199444	4	1580	XLOC_053913	PNPLA1	patatin like phospholipase domain containing 1 [Source:VGNC Symbol;Acc:VGNC:91606]
ENSSSCG00000036180	Upregulated	22752	2	-	1023263	1088602	TCONS_00116663	5	5660	XLOC_031931	ENSSSCG00000036180
ENSSSCG00000036180	Upregulated	22753	2	+	1039276	1101448	TCONS_00107043	2	574	XLOC_029450	ENSSSCG00000036180
ENSSSCG00000036180	Upregulated	22756	2	-	1045202	1076460	TCONS_00116665	10	4660	XLOC_031938	ENSSSCG00000036180
ENSSSCG00000036180	Upregulated	22759	2	-	1073893	1076265	TCONS_00116667	10	1882	XLOC_031938	ENSSSCG00000036180
ENSSSCG00000036180	Upregulated	22760	2	+	1074550	1076380	TCONS_00107046	3	1714	XLOC_029452	ENSSSCG00000036180
ENSSSCG00000036180	Upregulated	22761	2	-	1075336	1076262	TCONS_00116668	9	564	XLOC_031938	ENSSSCG00000036180
ENSSSCG00000024009	Upregulated	96177	6	-	78730109	78732347	TCONS_00185251	3	1147	XLOC_050106	ENSSSCG00000024009	calcium/calmodulin dependent protein kinase II inhibitor 1 [Source:VGNC Symbol;Acc:VGNC:96935]
ENSSSCG00000024009	Upregulated	96178	6	-	78730109	78732393	TCONS_00185252	2	1512	XLOC_050106	ENSSSCG00000024009	calcium/calmodulin dependent protein kinase II inhibitor 1 [Source:VGNC Symbol;Acc:VGNC:96935]
ENSSSCG00000024009	Upregulated	96179	6	+	78730219	78733335	TCONS_00174594	2	1500	XLOC_047320	ENSSSCG00000024009	calcium/calmodulin dependent protein kinase II inhibitor 1 [Source:VGNC Symbol;Acc:VGNC:96935]
ENSSSCG00000024009	Upregulated	96180	6	+	78730273	78732256	TCONS_00174595	2	1272	XLOC_047320	ENSSSCG00000024009	calcium/calmodulin dependent protein kinase II inhibitor 1 [Source:VGNC Symbol;Acc:VGNC:96935]
ENSSSCG00000024009	Upregulated	96181	6	-	78730657	78734143	TCONS_00185253	3	1423	XLOC_050106	ENSSSCG00000024009	calcium/calmodulin dependent protein kinase II inhibitor 1 [Source:VGNC Symbol;Acc:VGNC:96935]
ENSSSCG00000024009	Upregulated	96182	6	+	78730931	78732297	TCONS_00174596	2	594	XLOC_047320	ENSSSCG00000024009	calcium/calmodulin dependent protein kinase II inhibitor 1 [Source:VGNC Symbol;Acc:VGNC:96935]
ENSSSCG00000006196	Upregulated	63327	4	+	65422604	65589118	TCONS_00145452	12	9364	XLOC_039551	SLCO5A1	solute carrier organic anion transporter family member 5A1 [Source:HGNC Symbol;Acc:HGNC:19046]
ENSSSCG00000006196	Upregulated	63328	4	+	65422639	65589118	TCONS_00145453	11	9264	XLOC_039551	SLCO5A1	solute carrier organic anion transporter family member 5A1 [Source:HGNC Symbol;Acc:HGNC:19046]
ENSSSCG00000006196	Upregulated	63329	4	+	65439178	65582783	TCONS_00145454	9	2828	XLOC_039551	SLCO5A1	solute carrier organic anion transporter family member 5A1 [Source:HGNC Symbol;Acc:HGNC:19046]
ENSSSCG00000006196	Upregulated	63330	4	+	65439178	65583213	TCONS_00145455	10	3323	XLOC_039551	SLCO5A1	solute carrier organic anion transporter family member 5A1 [Source:HGNC Symbol;Acc:HGNC:19046]
ENSSSCG00000006196	Upregulated	63331	4	+	65439178	65583213	TCONS_00145456	9	3158	XLOC_039551	SLCO5A1	solute carrier organic anion transporter family member 5A1 [Source:HGNC Symbol;Acc:HGNC:19046]
ENSSSCG00000006196	Upregulated	63332	4	+	65439178	65589118	TCONS_00145457	12	9122	XLOC_039551	SLCO5A1	solute carrier organic anion transporter family member 5A1 [Source:HGNC Symbol;Acc:HGNC:19046]
ENSSSCG00000006196	Upregulated	63333	4	+	65439178	65589118	TCONS_00145458	8	8998	XLOC_039551	SLCO5A1	solute carrier organic anion transporter family member 5A1 [Source:HGNC Symbol;Acc:HGNC:19046]
ENSSSCG00000006196	Upregulated	63334	4	+	65439178	65589118	TCONS_00145459	12	9124	XLOC_039551	SLCO5A1	solute carrier organic anion transporter family member 5A1 [Source:HGNC Symbol;Acc:HGNC:19046]
ENSSSCG00000006196	Upregulated	63335	4	+	65439178	65589118	TCONS_00145460	12	9187	XLOC_039551	SLCO5A1	solute carrier organic anion transporter family member 5A1 [Source:HGNC Symbol;Acc:HGNC:19046]
ENSSSCG00000006196	Upregulated	63336	4	+	65440254	65589118	TCONS_00145461	11	9072	XLOC_039551	SLCO5A1	solute carrier organic anion transporter family member 5A1 [Source:HGNC Symbol;Acc:HGNC:19046]
ENSSSCG00000006196	Upregulated	63337	4	-	65441384	65589014	TCONS_00152072	9	8190	XLOC_041353	SLCO5A1	solute carrier organic anion transporter family member 5A1 [Source:HGNC Symbol;Acc:HGNC:19046]
ENSSSCG00000006196	Upregulated	63338	4	-	65441384	65589016	TCONS_00152073	8	8386	XLOC_041353	SLCO5A1	solute carrier organic anion transporter family member 5A1 [Source:HGNC Symbol;Acc:HGNC:19046]
ENSSSCG00000006196	Upregulated	63339	4	-	65441384	65589048	TCONS_00152074	11	8146	XLOC_041353	SLCO5A1	solute carrier organic anion transporter family member 5A1 [Source:HGNC Symbol;Acc:HGNC:19046]
ENSSSCG00000006196	Upregulated	63340	4	-	65441384	65589048	TCONS_00152075	11	8060	XLOC_041353	SLCO5A1	solute carrier organic anion transporter family member 5A1 [Source:HGNC Symbol;Acc:HGNC:19046]
ENSSSCG00000006196	Upregulated	63341	4	-	65441384	65589048	TCONS_00152076	8	8471	XLOC_041353	SLCO5A1	solute carrier organic anion transporter family member 5A1 [Source:HGNC Symbol;Acc:HGNC:19046]
ENSSSCG00000006196	Upregulated	63342	4	-	65441384	65589054	TCONS_00152077	10	8468	XLOC_041353	SLCO5A1	solute carrier organic anion transporter family member 5A1 [Source:HGNC Symbol;Acc:HGNC:19046]
ENSSSCG00000006196	Upregulated	63343	4	-	65481826	65588935	TCONS_00152078	9	7351	XLOC_041353	SLCO5A1	solute carrier organic anion transporter family member 5A1 [Source:HGNC Symbol;Acc:HGNC:19046]
ENSSSCG00000006196	Upregulated	63344	4	+	65481853	65589118	TCONS_00145462	8	7023	XLOC_039551	SLCO5A1	solute carrier organic anion transporter family member 5A1 [Source:HGNC Symbol;Acc:HGNC:19046]
ENSSSCG00000006196	Upregulated	63345	4	+	65482583	65589118	TCONS_00145463	3	3626	XLOC_039551	SLCO5A1	solute carrier organic anion transporter family member 5A1 [Source:HGNC Symbol;Acc:HGNC:19046]
ENSSSCG00000006196	Upregulated	63346	4	+	65562639	65589118	TCONS_00145464	5	6640	XLOC_039551	SLCO5A1	solute carrier organic anion transporter family member 5A1 [Source:HGNC Symbol;Acc:HGNC:19046]
ENSSSCG00000006196	Upregulated	63347	4	+	65570052	65589118	TCONS_00145465	5	6666	XLOC_039551	SLCO5A1	solute carrier organic anion transporter family member 5A1 [Source:HGNC Symbol;Acc:HGNC:19046]
ENSSSCG00000006196	Upregulated	63348	4	-	65573832	65589036	TCONS_00152079	7	6534	XLOC_041353	SLCO5A1	solute carrier organic anion transporter family member 5A1 [Source:HGNC Symbol;Acc:HGNC:19046]
ENSSSCG00000006196	Upregulated	63349	4	+	65573993	65589118	TCONS_00145466	6	6734	XLOC_039551	SLCO5A1	solute carrier organic anion transporter family member 5A1 [Source:HGNC Symbol;Acc:HGNC:19046]
ENSSSCG00000006196	Upregulated	63350	4	+	65579012	65589118	TCONS_00145467	3	6260	XLOC_039551	SLCO5A1	solute carrier organic anion transporter family member 5A1 [Source:HGNC Symbol;Acc:HGNC:19046]
ENSSSCG00000016873	Upregulated	209543	16	+	27858157	27930361	TCONS_00089718	6	2288	XLOC_024443	NIM1K	NIM1 serine/threonine protein kinase [Source:VGNC Symbol;Acc:VGNC:90744]
ENSSSCG00000016873	Upregulated	209544	16	+	27858157	27949978	TCONS_00089719	7	2431	XLOC_024443	NIM1K	NIM1 serine/threonine protein kinase [Source:VGNC Symbol;Acc:VGNC:90744]
ENSSSCG00000016873	Upregulated	209545	16	+	27858157	27957094	TCONS_00089720	18	12299	XLOC_024443	NIM1K	NIM1 serine/threonine protein kinase [Source:VGNC Symbol;Acc:VGNC:90744]
ENSSSCG00000016873	Upregulated	209546	16	-	27858260	27928921	TCONS_00092217	5	1474	XLOC_025245	NIM1K	NIM1 serine/threonine protein kinase [Source:VGNC Symbol;Acc:VGNC:90744]
ENSSSCG00000016873	Upregulated	209547	16	-	27858260	27930286	TCONS_00092218	5	2224	XLOC_025245	NIM1K	NIM1 serine/threonine protein kinase [Source:VGNC Symbol;Acc:VGNC:90744]
ENSSSCG00000016873	Upregulated	209548	16	-	27877281	27935972	TCONS_00092219	5	3241	XLOC_025245	NIM1K	NIM1 serine/threonine protein kinase [Source:VGNC Symbol;Acc:VGNC:90744]
ENSSSCG00000031786	Upregulated	98825	6	+	91747891	91756810	TCONS_00175842	7	3681	XLOC_047606	NCDN	neurochondrin [Source:VGNC Symbol;Acc:VGNC:90606]
ENSSSCG00000031786	Upregulated	98826	6	+	91747891	91756810	TCONS_00175843	8	3406	XLOC_047606	NCDN	neurochondrin [Source:VGNC Symbol;Acc:VGNC:90606]
ENSSSCG00000031786	Upregulated	98827	6	+	91747891	91756810	TCONS_00175844	7	4268	XLOC_047606	NCDN	neurochondrin [Source:VGNC Symbol;Acc:VGNC:90606]
ENSSSCG00000031786	Upregulated	98828	6	+	91747891	91756810	TCONS_00175845	7	4287	XLOC_047606	NCDN	neurochondrin [Source:VGNC Symbol;Acc:VGNC:90606]
ENSSSCG00000031786	Upregulated	98829	6	+	91747891	91756810	TCONS_00175846	8	4012	XLOC_047606	NCDN	neurochondrin [Source:VGNC Symbol;Acc:VGNC:90606]
ENSSSCG00000031786	Upregulated	98830	6	-	91747898	91755400	TCONS_00186643	6	2626	XLOC_050376	NCDN	neurochondrin [Source:VGNC Symbol;Acc:VGNC:90606]
ENSSSCG00000031786	Upregulated	98831	6	-	91747898	91756808	TCONS_00186644	7	3672	XLOC_050376	NCDN	neurochondrin [Source:VGNC Symbol;Acc:VGNC:90606]
ENSSSCG00000031786	Upregulated	98832	6	-	91747898	91756808	TCONS_00186645	7	4467	XLOC_050376	NCDN	neurochondrin [Source:VGNC Symbol;Acc:VGNC:90606]
ENSSSCG00000031786	Upregulated	98833	6	+	91747994	91756810	TCONS_00175847	7	3337	XLOC_047606	NCDN	neurochondrin [Source:VGNC Symbol;Acc:VGNC:90606]
ENSSSCG00000031786	Upregulated	98834	6	+	91748028	91756810	TCONS_00175848	6	4406	XLOC_047606	NCDN	neurochondrin [Source:VGNC Symbol;Acc:VGNC:90606]
ENSSSCG00000031786	Upregulated	98835	6	-	91748632	91756808	TCONS_00186646	7	3404	XLOC_050376	NCDN	neurochondrin [Source:VGNC Symbol;Acc:VGNC:90606]
ENSSSCG00000031786	Upregulated	98836	6	+	91750170	91756810	TCONS_00175849	5	3360	XLOC_047606	NCDN	neurochondrin [Source:VGNC Symbol;Acc:VGNC:90606]
ENSSSCG00000010577	Upregulated	195306	14	+	113225935	113230208	TCONS_00070040	6	1691	XLOC_019099	ELOVL3	ELOVL fatty acid elongase 3 [Source:VGNC Symbol;Acc:VGNC:87659]
ENSSSCG00000010577	Upregulated	195307	14	-	113226122	113230117	TCONS_00077609	5	1692	XLOC_020934	ELOVL3	ELOVL fatty acid elongase 3 [Source:VGNC Symbol;Acc:VGNC:87659]
ENSSSCG00000010577	Upregulated	195308	14	+	113226297	113230208	TCONS_00070041	4	1444	XLOC_019099	ELOVL3	ELOVL fatty acid elongase 3 [Source:VGNC Symbol;Acc:VGNC:87659]
ENSSSCG00000010577	Upregulated	195309	14	+	113226297	113230208	TCONS_00070042	6	1607	XLOC_019099	ELOVL3	ELOVL fatty acid elongase 3 [Source:VGNC Symbol;Acc:VGNC:87659]
ENSSSCG00000010577	Upregulated	195310	14	+	113226621	113230208	TCONS_00070043	3	1595	XLOC_019099	ELOVL3	ELOVL fatty acid elongase 3 [Source:VGNC Symbol;Acc:VGNC:87659]
ENSSSCG00000010577	Upregulated	195311	14	+	113226621	113230208	TCONS_00070044	4	1747	XLOC_019099	ELOVL3	ELOVL fatty acid elongase 3 [Source:VGNC Symbol;Acc:VGNC:87659]
ENSSSCG00000010577	Upregulated	195312	14	-	113226679	113230010	TCONS_00077610	4	1471	XLOC_020934	ELOVL3	ELOVL fatty acid elongase 3 [Source:VGNC Symbol;Acc:VGNC:87659]
ENSSSCG00000010577	Upregulated	195313	14	-	113226679	113230010	TCONS_00077611	3	1359	XLOC_020934	ELOVL3	ELOVL fatty acid elongase 3 [Source:VGNC Symbol;Acc:VGNC:87659]
ENSSSCG00000010577	Upregulated	195314	14	-	113226679	113230010	TCONS_00077612	3	1339	XLOC_020934	ELOVL3	ELOVL fatty acid elongase 3 [Source:VGNC Symbol;Acc:VGNC:87659]
ENSSSCG00000014431	Upregulated	41598	2	+	150445081	150507289	TCONS_00116243	18	2317	XLOC_031831	AFAP1L1	actin filament associated protein 1 like 1 [Source:VGNC Symbol;Acc:VGNC:85166]
ENSSSCG00000014431	Upregulated	41599	2	+	150445081	150510658	TCONS_00116244	18	5686	XLOC_031831	AFAP1L1	actin filament associated protein 1 like 1 [Source:VGNC Symbol;Acc:VGNC:85166]
ENSSSCG00000014431	Upregulated	41600	2	+	150445081	150510658	TCONS_00116245	19	5815	XLOC_031831	AFAP1L1	actin filament associated protein 1 like 1 [Source:VGNC Symbol;Acc:VGNC:85166]
ENSSSCG00000014431	Upregulated	41601	2	+	150445126	150510014	TCONS_00116246	19	5126	XLOC_031831	AFAP1L1	actin filament associated protein 1 like 1 [Source:VGNC Symbol;Acc:VGNC:85166]
ENSSSCG00000014431	Upregulated	41602	2	-	150445198	150510655	TCONS_00126259	19	5695	XLOC_034392	AFAP1L1	actin filament associated protein 1 like 1 [Source:VGNC Symbol;Acc:VGNC:85166]
ENSSSCG00000014431	Upregulated	41604	2	+	150467201	150510014	TCONS_00116247	19	8692	XLOC_031831	AFAP1L1	actin filament associated protein 1 like 1 [Source:VGNC Symbol;Acc:VGNC:85166]
ENSSSCG00000014431	Upregulated	41605	2	-	150471213	150510655	TCONS_00126261	18	5616	XLOC_034392	AFAP1L1	actin filament associated protein 1 like 1 [Source:VGNC Symbol;Acc:VGNC:85166]
ENSSSCG00000014431	Upregulated	41606	2	-	150472499	150510655	TCONS_00126262	17	5484	XLOC_034392	AFAP1L1	actin filament associated protein 1 like 1 [Source:VGNC Symbol;Acc:VGNC:85166]
ENSSSCG00000014431	Upregulated	41607	2	-	150476863	150503409	TCONS_00126263	13	1714	XLOC_034392	AFAP1L1	actin filament associated protein 1 like 1 [Source:VGNC Symbol;Acc:VGNC:85166]
ENSSSCG00000014431	Upregulated	41608	2	-	150486616	150510636	TCONS_00126264	8	4267	XLOC_034392	AFAP1L1	actin filament associated protein 1 like 1 [Source:VGNC Symbol;Acc:VGNC:85166]
ENSSSCG00000014431	Upregulated	41609	2	-	150504807	150510630	TCONS_00126265	3	3609	XLOC_034392	AFAP1L1	actin filament associated protein 1 like 1 [Source:VGNC Symbol;Acc:VGNC:85166]
ENSSSCG00000014431	Upregulated	41610	2	+	150504870	150524995	TCONS_00116248	7	7878	XLOC_031831	AFAP1L1	actin filament associated protein 1 like 1 [Source:VGNC Symbol;Acc:VGNC:85166]
ENSSSCG00000014431	Upregulated	41611	2	+	150506614	150510658	TCONS_00116249	2	3411	XLOC_031831	AFAP1L1	actin filament associated protein 1 like 1 [Source:VGNC Symbol;Acc:VGNC:85166]
ENSSSCG00000037821	Upregulated	65042	4	-	87286804	87344152	TCONS_00152945	5	5532	XLOC_041557	RGS5	regulator of G protein signaling 5 [Source:VGNC Symbol;Acc:VGNC:98844]
ENSSSCG00000037821	Upregulated	65043	4	-	87286804	87346903	TCONS_00152946	6	4618	XLOC_041557	RGS5	regulator of G protein signaling 5 [Source:VGNC Symbol;Acc:VGNC:98844]
ENSSSCG00000037821	Upregulated	65044	4	+	87286856	87344258	TCONS_00146293	8	5330	XLOC_039763	RGS5	regulator of G protein signaling 5 [Source:VGNC Symbol;Acc:VGNC:98844]
ENSSSCG00000037821	Upregulated	65045	4	+	87286953	87340824	TCONS_00146294	6	1829	XLOC_039763	RGS5	regulator of G protein signaling 5 [Source:VGNC Symbol;Acc:VGNC:98844]
ENSSSCG00000037821	Upregulated	65046	4	+	87286953	87344258	TCONS_00146295	6	5444	XLOC_039763	RGS5	regulator of G protein signaling 5 [Source:VGNC Symbol;Acc:VGNC:98844]
ENSSSCG00000037821	Upregulated	65047	4	+	87286953	87344258	TCONS_00146296	5	5489	XLOC_039763	RGS5	regulator of G protein signaling 5 [Source:VGNC Symbol;Acc:VGNC:98844]
ENSSSCG00000037821	Upregulated	65048	4	+	87286953	87344258	TCONS_00146297	5	5489	XLOC_039763	RGS5	regulator of G protein signaling 5 [Source:VGNC Symbol;Acc:VGNC:98844]
ENSSSCG00000037821	Upregulated	65049	4	+	87286953	87344258	TCONS_00146298	6	4066	XLOC_039763	RGS5	regulator of G protein signaling 5 [Source:VGNC Symbol;Acc:VGNC:98844]
ENSSSCG00000037821	Upregulated	65050	4	+	87286953	87344258	TCONS_00146299	9	5007	XLOC_039763	RGS5	regulator of G protein signaling 5 [Source:VGNC Symbol;Acc:VGNC:98844]
ENSSSCG00000037821	Upregulated	65051	4	+	87286962	87344251	TCONS_00146300	7	5374	XLOC_039763	RGS5	regulator of G protein signaling 5 [Source:VGNC Symbol;Acc:VGNC:98844]
ENSSSCG00000011793	Upregulated	176522	13	+	123356243	123395735	TCONS_00051930	12	4959	XLOC_014339	LIPH	lipase H [Source:VGNC Symbol;Acc:VGNC:89740]
ENSSSCG00000011793	Upregulated	176526	13	+	123356465	123419451	TCONS_00051932	14	3655	XLOC_014339	LIPH	lipase H [Source:VGNC Symbol;Acc:VGNC:89740]
ENSSSCG00000011793	Upregulated	176527	13	+	123356473	123419451	TCONS_00051933	14	4938	XLOC_014339	LIPH	lipase H [Source:VGNC Symbol;Acc:VGNC:89740]
ENSSSCG00000011793	Upregulated	176530	13	-	123365336	123419434	TCONS_00060723	11	2890	XLOC_016620	LIPH	lipase H [Source:VGNC Symbol;Acc:VGNC:89740]
ENSSSCG00000011793	Upregulated	176531	13	-	123365578	123419480	TCONS_00060724	11	2777	XLOC_016620	LIPH	lipase H [Source:VGNC Symbol;Acc:VGNC:89740]
ENSSSCG00000011793	Upregulated	176535	13	-	123371004	123419506	TCONS_00060726	11	2868	XLOC_016620	LIPH	lipase H [Source:VGNC Symbol;Acc:VGNC:89740]
ENSSSCG00000011793	Upregulated	176536	13	-	123371860	123419434	TCONS_00060727	10	3143	XLOC_016620	LIPH	lipase H [Source:VGNC Symbol;Acc:VGNC:89740]
ENSSSCG00000011793	Upregulated	176537	13	-	123371860	123419434	TCONS_00060728	9	3041	XLOC_016620	LIPH	lipase H [Source:VGNC Symbol;Acc:VGNC:89740]
ENSSSCG00000011793	Upregulated	176538	13	+	123372049	123419451	TCONS_00051937	10	2971	XLOC_014339	LIPH	lipase H [Source:VGNC Symbol;Acc:VGNC:89740]
ENSSSCG00000017978	Upregulated	164022	12	+	53255737	53282762	TCONS_00039762	18	5091	XLOC_011228	ALOX15B	arachidonate 15-lipoxygenase type B [Source:VGNC Symbol;Acc:VGNC:98972]
ENSSSCG00000017978	Upregulated	164023	12	+	53255789	53282762	TCONS_00039763	17	6245	XLOC_011228	ALOX15B	arachidonate 15-lipoxygenase type B [Source:VGNC Symbol;Acc:VGNC:98972]
ENSSSCG00000017978	Upregulated	164024	12	+	53255828	53282762	TCONS_00039764	17	6318	XLOC_011228	ALOX15B	arachidonate 15-lipoxygenase type B [Source:VGNC Symbol;Acc:VGNC:98972]
ENSSSCG00000017978	Upregulated	164025	12	+	53255850	53282762	TCONS_00039765	18	4978	XLOC_011228	ALOX15B	arachidonate 15-lipoxygenase type B [Source:VGNC Symbol;Acc:VGNC:98972]
ENSSSCG00000017978	Upregulated	164026	12	+	53259940	53281520	TCONS_00039766	17	5122	XLOC_011228	ALOX15B	arachidonate 15-lipoxygenase type B [Source:VGNC Symbol;Acc:VGNC:98972]
ENSSSCG00000017978	Upregulated	164027	12	+	53259940	53281520	TCONS_00039767	16	5035	XLOC_011228	ALOX15B	arachidonate 15-lipoxygenase type B [Source:VGNC Symbol;Acc:VGNC:98972]
ENSSSCG00000017978	Upregulated	164028	12	+	53259940	53281520	TCONS_00039768	15	4900	XLOC_011228	ALOX15B	arachidonate 15-lipoxygenase type B [Source:VGNC Symbol;Acc:VGNC:98972]
ENSSSCG00000017978	Upregulated	164029	12	+	53259940	53282762	TCONS_00039769	17	6319	XLOC_011228	ALOX15B	arachidonate 15-lipoxygenase type B [Source:VGNC Symbol;Acc:VGNC:98972]
ENSSSCG00000017978	Upregulated	164030	12	+	53259940	53282762	TCONS_00039770	17	6361	XLOC_011228	ALOX15B	arachidonate 15-lipoxygenase type B [Source:VGNC Symbol;Acc:VGNC:98972]
ENSSSCG00000017978	Upregulated	164031	12	+	53259940	53282762	TCONS_00039771	16	6242	XLOC_011228	ALOX15B	arachidonate 15-lipoxygenase type B [Source:VGNC Symbol;Acc:VGNC:98972]
ENSSSCG00000017978	Upregulated	164032	12	+	53259940	53282762	TCONS_00039772	18	5046	XLOC_011228	ALOX15B	arachidonate 15-lipoxygenase type B [Source:VGNC Symbol;Acc:VGNC:98972]
ENSSSCG00000017978	Upregulated	164033	12	+	53259940	53282762	TCONS_00039773	17	4982	XLOC_011228	ALOX15B	arachidonate 15-lipoxygenase type B [Source:VGNC Symbol;Acc:VGNC:98972]
ENSSSCG00000017978	Upregulated	164034	12	+	53259940	53282762	TCONS_00039774	18	4983	XLOC_011228	ALOX15B	arachidonate 15-lipoxygenase type B [Source:VGNC Symbol;Acc:VGNC:98972]
ENSSSCG00000017978	Upregulated	164035	12	+	53259940	53282762	TCONS_00039775	17	4606	XLOC_011228	ALOX15B	arachidonate 15-lipoxygenase type B [Source:VGNC Symbol;Acc:VGNC:98972]
ENSSSCG00000017978	Upregulated	164036	12	+	53259940	53282762	TCONS_00039776	16	4471	XLOC_011228	ALOX15B	arachidonate 15-lipoxygenase type B [Source:VGNC Symbol;Acc:VGNC:98972]
ENSSSCG00000017978	Upregulated	164037	12	+	53259940	53282762	TCONS_00039777	16	5898	XLOC_011228	ALOX15B	arachidonate 15-lipoxygenase type B [Source:VGNC Symbol;Acc:VGNC:98972]
ENSSSCG00000017978	Upregulated	164038	12	+	53259940	53282762	TCONS_00039778	17	5990	XLOC_011228	ALOX15B	arachidonate 15-lipoxygenase type B [Source:VGNC Symbol;Acc:VGNC:98972]
ENSSSCG00000017978	Upregulated	164039	12	-	53271228	53282719	TCONS_00045698	14	4503	XLOC_012726	ALOX15B	arachidonate 15-lipoxygenase type B [Source:VGNC Symbol;Acc:VGNC:98972]
ENSSSCG00000017978	Upregulated	164040	12	-	53272274	53281507	TCONS_00045699	13	2303	XLOC_012726	ALOX15B	arachidonate 15-lipoxygenase type B [Source:VGNC Symbol;Acc:VGNC:98972]
ENSSSCG00000017978	Upregulated	164042	12	+	53275036	53282762	TCONS_00039779	12	3504	XLOC_011228	ALOX15B	arachidonate 15-lipoxygenase type B [Source:VGNC Symbol;Acc:VGNC:98972]
ENSSSCG00000017978	Upregulated	164043	12	+	53276373	53282762	TCONS_00039780	10	3351	XLOC_011228	ALOX15B	arachidonate 15-lipoxygenase type B [Source:VGNC Symbol;Acc:VGNC:98972]
ENSSSCG00000017978	Upregulated	164045	12	+	53277124	53282762	TCONS_00039781	7	3173	XLOC_011228	ALOX15B	arachidonate 15-lipoxygenase type B [Source:VGNC Symbol;Acc:VGNC:98972]
ENSSSCG00000016062	Upregulated	203740	15	-	96313869	96319094	TCONS_00086889	5	951	XLOC_023539	NABP1	nucleic acid binding protein 1 [Source:VGNC Symbol;Acc:VGNC:96122]
ENSSSCG00000016062	Upregulated	203741	15	-	96313869	96329084	TCONS_00086890	7	8593	XLOC_023539	NABP1	nucleic acid binding protein 1 [Source:VGNC Symbol;Acc:VGNC:96122]
ENSSSCG00000016062	Upregulated	203742	15	-	96313869	96329169	TCONS_00086891	8	8384	XLOC_023539	NABP1	nucleic acid binding protein 1 [Source:VGNC Symbol;Acc:VGNC:96122]
ENSSSCG00000016062	Upregulated	203744	15	+	96313890	96607777	TCONS_00081656	12	9274	XLOC_022122	NABP1	nucleic acid binding protein 1 [Source:VGNC Symbol;Acc:VGNC:96122]
ENSSSCG00000016062	Upregulated	203745	15	+	96313902	96426962	TCONS_00081657	11	9010	XLOC_022122	NABP1	nucleic acid binding protein 1 [Source:VGNC Symbol;Acc:VGNC:96122]
ENSSSCG00000016062	Upregulated	203746	15	+	96313903	96329133	TCONS_00081658	7	8590	XLOC_022122	NABP1	nucleic acid binding protein 1 [Source:VGNC Symbol;Acc:VGNC:96122]
ENSSSCG00000016062	Upregulated	203747	15	+	96313903	96329133	TCONS_00081659	7	8572	XLOC_022122	NABP1	nucleic acid binding protein 1 [Source:VGNC Symbol;Acc:VGNC:96122]
ENSSSCG00000016062	Upregulated	203748	15	+	96313903	96335191	TCONS_00081660	8	9472	XLOC_022122	NABP1	nucleic acid binding protein 1 [Source:VGNC Symbol;Acc:VGNC:96122]
ENSSSCG00000016062	Upregulated	203749	15	+	96313903	96335191	TCONS_00081661	8	9483	XLOC_022122	NABP1	nucleic acid binding protein 1 [Source:VGNC Symbol;Acc:VGNC:96122]
ENSSSCG00000016062	Upregulated	203750	15	+	96313903	96370282	TCONS_00081662	9	8897	XLOC_022122	NABP1	nucleic acid binding protein 1 [Source:VGNC Symbol;Acc:VGNC:96122]
ENSSSCG00000016062	Upregulated	203751	15	+	96313903	96417832	TCONS_00081663	10	4166	XLOC_022122	NABP1	nucleic acid binding protein 1 [Source:VGNC Symbol;Acc:VGNC:96122]
ENSSSCG00000016062	Upregulated	203752	15	+	96313903	96426962	TCONS_00081664	9	8940	XLOC_022122	NABP1	nucleic acid binding protein 1 [Source:VGNC Symbol;Acc:VGNC:96122]
ENSSSCG00000016062	Upregulated	203753	15	+	96313903	96475599	TCONS_00081665	9	9390	XLOC_022122	NABP1	nucleic acid binding protein 1 [Source:VGNC Symbol;Acc:VGNC:96122]
ENSSSCG00000016062	Upregulated	203754	15	+	96313903	96495842	TCONS_00081666	9	8914	XLOC_022122	NABP1	nucleic acid binding protein 1 [Source:VGNC Symbol;Acc:VGNC:96122]
ENSSSCG00000046097	Upregulated	201564	15	-	65845582	65859863	TCONS_00085761	3	1085	XLOC_023268	ENSSSCG00000046097
ENSSSCG00000046097	Upregulated	201565	15	+	65845595	65859099	TCONS_00080616	2	1869	XLOC_021831	ENSSSCG00000046097
ENSSSCG00000046097	Upregulated	201575	15	-	65854611	65859725	TCONS_00085764	2	3554	XLOC_023268	ENSSSCG00000046097
ENSSSCG00000046097	Upregulated	201576	15	-	65854613	65859863	TCONS_00085765	3	4946	XLOC_023268	ENSSSCG00000046097
ENSSSCG00000046097	Upregulated	201577	15	+	65857274	65859099	TCONS_00080624	2	1294	XLOC_021831	ENSSSCG00000046097
ENSSSCG00000035409	Upregulated	127763	8	-	121133364	121140013	TCONS_00212929	4	466	XLOC_057755	ENSSSCG00000035409
ENSSSCG00000035409	Upregulated	127784	8	+	121133465	121171016	TCONS_00208131	10	1374	XLOC_056377	ENSSSCG00000035409
ENSSSCG00000035409	Upregulated	127785	8	+	121133467	121171016	TCONS_00208132	10	1288	XLOC_056377	ENSSSCG00000035409
ENSSSCG00000035409	Upregulated	127786	8	+	121133472	121171016	TCONS_00208133	10	1352	XLOC_056377	ENSSSCG00000035409
ENSSSCG00000035409	Upregulated	127788	8	+	121136916	121147052	TCONS_00208134	8	1110	XLOC_056377	ENSSSCG00000035409
ENSSSCG00000035409	Upregulated	127789	8	+	121136916	121171016	TCONS_00208135	10	1299	XLOC_056377	ENSSSCG00000035409
ENSSSCG00000035409	Upregulated	127790	8	+	121136916	121171016	TCONS_00208136	10	1314	XLOC_056377	ENSSSCG00000035409
ENSSSCG00000035409	Upregulated	127791	8	+	121137783	121147052	TCONS_00208137	8	1113	XLOC_056377	ENSSSCG00000035409
ENSSSCG00000035409	Upregulated	127792	8	+	121137783	121148460	TCONS_00208138	9	1324	XLOC_056377	ENSSSCG00000035409
ENSSSCG00000035409	Upregulated	127793	8	+	121137783	121171016	TCONS_00208139	10	1338	XLOC_056377	ENSSSCG00000035409
ENSSSCG00000035409	Upregulated	127794	8	+	121137783	121171016	TCONS_00208140	10	1323	XLOC_056377	ENSSSCG00000035409
ENSSSCG00000035409	Upregulated	127795	8	+	121137820	121147052	TCONS_00208141	7	1194	XLOC_056377	ENSSSCG00000035409
ENSSSCG00000035409	Upregulated	127796	8	+	121142626	121148460	TCONS_00208142	7	1238	XLOC_056377	ENSSSCG00000035409
ENSSSCG00000033142	Upregulated	81827	5	-	77838915	78089841	TCONS_00167349	11	2601	XLOC_045420	ENDOU	endonuclease, poly(U) specific [Source:VGNC Symbol;Acc:VGNC:103233]
ENSSSCG00000033142	Upregulated	81853	5	+	78071961	78090253	TCONS_00161388	10	3103	XLOC_043744	ENDOU	endonuclease, poly(U) specific [Source:VGNC Symbol;Acc:VGNC:103233]
ENSSSCG00000033142	Upregulated	81854	5	+	78071996	78090253	TCONS_00161389	10	2977	XLOC_043744	ENDOU	endonuclease, poly(U) specific [Source:VGNC Symbol;Acc:VGNC:103233]
ENSSSCG00000033142	Upregulated	81855	5	+	78072034	78090253	TCONS_00161390	9	2907	XLOC_043744	ENDOU	endonuclease, poly(U) specific [Source:VGNC Symbol;Acc:VGNC:103233]
ENSSSCG00000033142	Upregulated	81856	5	+	78072046	78090253	TCONS_00161391	10	2932	XLOC_043744	ENDOU	endonuclease, poly(U) specific [Source:VGNC Symbol;Acc:VGNC:103233]
ENSSSCG00000033142	Upregulated	81857	5	-	78072062	78081830	TCONS_00167367	9	2108	XLOC_045420	ENDOU	endonuclease, poly(U) specific [Source:VGNC Symbol;Acc:VGNC:103233]
ENSSSCG00000033142	Upregulated	81858	5	-	78072062	78086394	TCONS_00167368	10	2264	XLOC_045420	ENDOU	endonuclease, poly(U) specific [Source:VGNC Symbol;Acc:VGNC:103233]
ENSSSCG00000033142	Upregulated	81859	5	-	78072062	78089520	TCONS_00167369	9	2140	XLOC_045420	ENDOU	endonuclease, poly(U) specific [Source:VGNC Symbol;Acc:VGNC:103233]
ENSSSCG00000033142	Upregulated	81860	5	-	78072062	78089520	TCONS_00167370	8	2074	XLOC_045420	ENDOU	endonuclease, poly(U) specific [Source:VGNC Symbol;Acc:VGNC:103233]
ENSSSCG00000033142	Upregulated	81861	5	-	78072062	78089680	TCONS_00167371	10	2429	XLOC_045420	ENDOU	endonuclease, poly(U) specific [Source:VGNC Symbol;Acc:VGNC:103233]
ENSSSCG00000033142	Upregulated	81862	5	-	78072062	78089680	TCONS_00167372	10	2423	XLOC_045420	ENDOU	endonuclease, poly(U) specific [Source:VGNC Symbol;Acc:VGNC:103233]
ENSSSCG00000033142	Upregulated	81863	5	-	78072062	78089688	TCONS_00167373	10	2437	XLOC_045420	ENDOU	endonuclease, poly(U) specific [Source:VGNC Symbol;Acc:VGNC:103233]
ENSSSCG00000033142	Upregulated	81864	5	+	78072066	78090253	TCONS_00161392	10	2996	XLOC_043744	ENDOU	endonuclease, poly(U) specific [Source:VGNC Symbol;Acc:VGNC:103233]
ENSSSCG00000033142	Upregulated	81865	5	+	78072123	78090253	TCONS_00161393	10	2941	XLOC_043744	ENDOU	endonuclease, poly(U) specific [Source:VGNC Symbol;Acc:VGNC:103233]
ENSSSCG00000048217	Upregulated	22704	2	-	843217	1088554	TCONS_00116642	5	737	XLOC_031931	ENSSSCG00000048217
ENSSSCG00000048217	Upregulated	22762	2	-	1086180	1088580	TCONS_00116669	8	2127	XLOC_031931	ENSSSCG00000048217
ENSSSCG00000048217	Upregulated	22763	2	-	1087201	1088554	TCONS_00116670	6	999	XLOC_031931	ENSSSCG00000048217
ENSSSCG00000048217	Upregulated	22764	2	+	1087209	1088136	TCONS_00107047	1	928	XLOC_029453	ENSSSCG00000048217
ENSSSCG00000048217	Upregulated	22765	2	-	1087772	1088554	TCONS_00116671	5	608	XLOC_031931	ENSSSCG00000048217
ENSSSCG00000039875	Upregulated	88200	6	-	34223718	34261712	TCONS_00181362	8	4770	XLOC_049079	NKD1	NKD inhibitor of WNT signaling pathway 1 [Source:VGNC Symbol;Acc:VGNC:90759]
ENSSSCG00000039875	Upregulated	88201	6	-	34223718	34283269	TCONS_00181363	6	4512	XLOC_049079	NKD1	NKD inhibitor of WNT signaling pathway 1 [Source:VGNC Symbol;Acc:VGNC:90759]
ENSSSCG00000039875	Upregulated	88202	6	-	34223718	34311502	TCONS_00181364	8	4854	XLOC_049079	NKD1	NKD inhibitor of WNT signaling pathway 1 [Source:VGNC Symbol;Acc:VGNC:90759]
ENSSSCG00000039875	Upregulated	88203	6	-	34223718	34319528	TCONS_00181365	10	5063	XLOC_049079	NKD1	NKD inhibitor of WNT signaling pathway 1 [Source:VGNC Symbol;Acc:VGNC:90759]
ENSSSCG00000039875	Upregulated	88204	6	-	34223718	34319528	TCONS_00181366	11	4321	XLOC_049079	NKD1	NKD inhibitor of WNT signaling pathway 1 [Source:VGNC Symbol;Acc:VGNC:90759]
ENSSSCG00000039875	Upregulated	88205	6	-	34223718	34319528	TCONS_00181367	11	4321	XLOC_049079	NKD1	NKD inhibitor of WNT signaling pathway 1 [Source:VGNC Symbol;Acc:VGNC:90759]
ENSSSCG00000039875	Upregulated	88206	6	-	34223718	34319528	TCONS_00181368	10	5063	XLOC_049079	NKD1	NKD inhibitor of WNT signaling pathway 1 [Source:VGNC Symbol;Acc:VGNC:90759]
ENSSSCG00000039875	Upregulated	88207	6	-	34223718	34319528	TCONS_00181369	11	4321	XLOC_049079	NKD1	NKD inhibitor of WNT signaling pathway 1 [Source:VGNC Symbol;Acc:VGNC:90759]
ENSSSCG00000039875	Upregulated	88208	6	-	34223718	34319528	TCONS_00181370	11	4321	XLOC_049079	NKD1	NKD inhibitor of WNT signaling pathway 1 [Source:VGNC Symbol;Acc:VGNC:90759]
ENSSSCG00000039875	Upregulated	88209	6	-	34223718	34319528	TCONS_00181371	10	5063	XLOC_049079	NKD1	NKD inhibitor of WNT signaling pathway 1 [Source:VGNC Symbol;Acc:VGNC:90759]
ENSSSCG00000039875	Upregulated	88210	6	-	34223718	34319528	TCONS_00181372	11	4331	XLOC_049079	NKD1	NKD inhibitor of WNT signaling pathway 1 [Source:VGNC Symbol;Acc:VGNC:90759]
ENSSSCG00000039875	Upregulated	88211	6	-	34223718	34319528	TCONS_00181373	10	5063	XLOC_049079	NKD1	NKD inhibitor of WNT signaling pathway 1 [Source:VGNC Symbol;Acc:VGNC:90759]
ENSSSCG00000039875	Upregulated	88212	6	-	34223718	34319528	TCONS_00181374	10	5063	XLOC_049079	NKD1	NKD inhibitor of WNT signaling pathway 1 [Source:VGNC Symbol;Acc:VGNC:90759]
ENSSSCG00000039875	Upregulated	88213	6	+	34223849	34319517	TCONS_00170516	11	4179	XLOC_046282	NKD1	NKD inhibitor of WNT signaling pathway 1 [Source:VGNC Symbol;Acc:VGNC:90759]
ENSSSCG00000039875	Upregulated	88214	6	-	34223884	34319528	TCONS_00181375	9	4769	XLOC_049079	NKD1	NKD inhibitor of WNT signaling pathway 1 [Source:VGNC Symbol;Acc:VGNC:90759]
ENSSSCG00000039875	Upregulated	88215	6	+	34224371	34319517	TCONS_00170517	10	4399	XLOC_046282	NKD1	NKD inhibitor of WNT signaling pathway 1 [Source:VGNC Symbol;Acc:VGNC:90759]
ENSSSCG00000039875	Upregulated	88216	6	+	34224480	34261666	TCONS_00170518	9	3220	XLOC_046282	NKD1	NKD inhibitor of WNT signaling pathway 1 [Source:VGNC Symbol;Acc:VGNC:90759]
ENSSSCG00000039875	Upregulated	88217	6	+	34224480	34318396	TCONS_00170519	9	3271	XLOC_046282	NKD1	NKD inhibitor of WNT signaling pathway 1 [Source:VGNC Symbol;Acc:VGNC:90759]
ENSSSCG00000039875	Upregulated	88218	6	-	34226167	34319528	TCONS_00181376	10	2614	XLOC_049079	NKD1	NKD inhibitor of WNT signaling pathway 1 [Source:VGNC Symbol;Acc:VGNC:90759]
ENSSSCG00000046443	Upregulated	211143	16	+	49760284	49772217	TCONS_00090493	3	4698	XLOC_024661	ENSSSCG00000046443
ENSSSCG00000046443	Upregulated	211144	16	+	49760300	49766471	TCONS_00090494	2	2812	XLOC_024661	ENSSSCG00000046443
ENSSSCG00000046443	Upregulated	211145	16	+	49760300	49767863	TCONS_00090495	4	3867	XLOC_024661	ENSSSCG00000046443
ENSSSCG00000046443	Upregulated	211146	16	+	49760300	49769344	TCONS_00090496	3	3694	XLOC_024661	ENSSSCG00000046443
ENSSSCG00000046443	Upregulated	211147	16	+	49760300	49769649	TCONS_00090497	3	3735	XLOC_024661	ENSSSCG00000046443
ENSSSCG00000046443	Upregulated	211148	16	+	49760300	49770381	TCONS_00090498	3	3715	XLOC_024661	ENSSSCG00000046443
ENSSSCG00000026233	Upregulated	37243	2	+	97632250	97688848	TCONS_00114108	9	8573	XLOC_031203	ENSSSCG00000026233	RNA polymerase III subunit G [Source:VGNC Symbol;Acc:VGNC:100335]
ENSSSCG00000026233	Upregulated	37244	2	+	97632260	97688848	TCONS_00114109	10	8668	XLOC_031203	ENSSSCG00000026233	RNA polymerase III subunit G [Source:VGNC Symbol;Acc:VGNC:100335]
ENSSSCG00000026233	Upregulated	37245	2	+	97632273	97688848	TCONS_00114110	9	8553	XLOC_031203	ENSSSCG00000026233	RNA polymerase III subunit G [Source:VGNC Symbol;Acc:VGNC:100335]
ENSSSCG00000026233	Upregulated	37255	2	+	97648233	97688848	TCONS_00114112	8	3868	XLOC_031203	ENSSSCG00000026233	RNA polymerase III subunit G [Source:VGNC Symbol;Acc:VGNC:100335]
ENSSSCG00000026233	Upregulated	37256	2	-	97648276	97688599	TCONS_00124072	9	3296	XLOC_033767	ENSSSCG00000026233	RNA polymerase III subunit G [Source:VGNC Symbol;Acc:VGNC:100335]
ENSSSCG00000026233	Upregulated	37257	2	+	97648323	97688158	TCONS_00114113	9	3184	XLOC_031203	ENSSSCG00000026233	RNA polymerase III subunit G [Source:VGNC Symbol;Acc:VGNC:100335]
ENSSSCG00000026233	Upregulated	37258	2	+	97648323	97688848	TCONS_00114114	9	3871	XLOC_031203	ENSSSCG00000026233	RNA polymerase III subunit G [Source:VGNC Symbol;Acc:VGNC:100335]
ENSSSCG00000026233	Upregulated	37259	2	+	97648610	97688848	TCONS_00114115	8	3828	XLOC_031203	ENSSSCG00000026233	RNA polymerase III subunit G [Source:VGNC Symbol;Acc:VGNC:100335]
ENSSSCG00000026233	Upregulated	37260	2	+	97648635	97688848	TCONS_00114116	8	3806	XLOC_031203	ENSSSCG00000026233	RNA polymerase III subunit G [Source:VGNC Symbol;Acc:VGNC:100335]
ENSSSCG00000026233	Upregulated	37261	2	-	97648705	97688629	TCONS_00124073	8	3483	XLOC_033767	ENSSSCG00000026233	RNA polymerase III subunit G [Source:VGNC Symbol;Acc:VGNC:100335]
ENSSSCG00000026233	Upregulated	37262	2	-	97648705	97688767	TCONS_00124074	8	3655	XLOC_033767	ENSSSCG00000026233	RNA polymerase III subunit G [Source:VGNC Symbol;Acc:VGNC:100335]
ENSSSCG00000026233	Upregulated	37263	2	+	97649993	97688848	TCONS_00114117	8	3874	XLOC_031203	ENSSSCG00000026233	RNA polymerase III subunit G [Source:VGNC Symbol;Acc:VGNC:100335]
ENSSSCG00000026233	Upregulated	37264	2	+	97650138	97688848	TCONS_00114118	8	3732	XLOC_031203	ENSSSCG00000026233	RNA polymerase III subunit G [Source:VGNC Symbol;Acc:VGNC:100335]
ENSSSCG00000026233	Upregulated	37265	2	+	97656967	97688848	TCONS_00114119	7	3699	XLOC_031203	ENSSSCG00000026233	RNA polymerase III subunit G [Source:VGNC Symbol;Acc:VGNC:100335]
ENSSSCG00000026233	Upregulated	37266	2	-	97656969	97688741	TCONS_00124075	8	3619	XLOC_033767	ENSSSCG00000026233	RNA polymerase III subunit G [Source:VGNC Symbol;Acc:VGNC:100335]
ENSSSCG00000026233	Upregulated	37267	2	+	97656973	97688848	TCONS_00114120	9	3835	XLOC_031203	ENSSSCG00000026233	RNA polymerase III subunit G [Source:VGNC Symbol;Acc:VGNC:100335]
ENSSSCG00000026233	Upregulated	37268	2	+	97656997	97688848	TCONS_00114121	8	3729	XLOC_031203	ENSSSCG00000026233	RNA polymerase III subunit G [Source:VGNC Symbol;Acc:VGNC:100335]
ENSSSCG00000017265	Upregulated	156209	12	+	12252930	12341437	TCONS_00035790	3	3854	XLOC_010378	AXIN2	axin 2 [Source:VGNC Symbol;Acc:VGNC:85708]
ENSSSCG00000017265	Upregulated	156213	12	-	12311293	12340536	TCONS_00041869	9	4060	XLOC_011810	AXIN2	axin 2 [Source:VGNC Symbol;Acc:VGNC:85708]
ENSSSCG00000017265	Upregulated	156214	12	-	12311293	12341100	TCONS_00041870	11	4061	XLOC_011810	AXIN2	axin 2 [Source:VGNC Symbol;Acc:VGNC:85708]
ENSSSCG00000017265	Upregulated	156215	12	-	12311293	12341139	TCONS_00041871	10	3914	XLOC_011810	AXIN2	axin 2 [Source:VGNC Symbol;Acc:VGNC:85708]
ENSSSCG00000017265	Upregulated	156216	12	-	12311293	12341139	TCONS_00041872	11	4100	XLOC_011810	AXIN2	axin 2 [Source:VGNC Symbol;Acc:VGNC:85708]
ENSSSCG00000017265	Upregulated	156217	12	-	12311293	12341307	TCONS_00041873	11	4268	XLOC_011810	AXIN2	axin 2 [Source:VGNC Symbol;Acc:VGNC:85708]
ENSSSCG00000017265	Upregulated	156218	12	-	12311293	12341411	TCONS_00041874	10	4186	XLOC_011810	AXIN2	axin 2 [Source:VGNC Symbol;Acc:VGNC:85708]
ENSSSCG00000017265	Upregulated	156219	12	-	12311293	12341420	TCONS_00041875	10	4195	XLOC_011810	AXIN2	axin 2 [Source:VGNC Symbol;Acc:VGNC:85708]
ENSSSCG00000017265	Upregulated	156220	12	-	12311293	12342131	TCONS_00041876	11	4060	XLOC_011810	AXIN2	axin 2 [Source:VGNC Symbol;Acc:VGNC:85708]
ENSSSCG00000017265	Upregulated	156221	12	-	12311293	12342186	TCONS_00041877	11	4115	XLOC_011810	AXIN2	axin 2 [Source:VGNC Symbol;Acc:VGNC:85708]
ENSSSCG00000017265	Upregulated	156222	12	-	12311293	12342191	TCONS_00041878	10	3930	XLOC_011810	AXIN2	axin 2 [Source:VGNC Symbol;Acc:VGNC:85708]
ENSSSCG00000017265	Upregulated	156223	12	-	12311293	12342198	TCONS_00041879	10	3941	XLOC_011810	AXIN2	axin 2 [Source:VGNC Symbol;Acc:VGNC:85708]
ENSSSCG00000017265	Upregulated	156224	12	-	12311293	12342206	TCONS_00041880	10	3949	XLOC_011810	AXIN2	axin 2 [Source:VGNC Symbol;Acc:VGNC:85708]
ENSSSCG00000017265	Upregulated	156225	12	-	12311293	12342444	TCONS_00041881	10	3875	XLOC_011810	AXIN2	axin 2 [Source:VGNC Symbol;Acc:VGNC:85708]
ENSSSCG00000017265	Upregulated	156226	12	-	12311293	12342446	TCONS_00041882	11	4063	XLOC_011810	AXIN2	axin 2 [Source:VGNC Symbol;Acc:VGNC:85708]
ENSSSCG00000017265	Upregulated	156227	12	-	12311293	12342447	TCONS_00041883	11	4060	XLOC_011810	AXIN2	axin 2 [Source:VGNC Symbol;Acc:VGNC:85708]
ENSSSCG00000017265	Upregulated	156228	12	-	12311293	12342462	TCONS_00041884	10	3893	XLOC_011810	AXIN2	axin 2 [Source:VGNC Symbol;Acc:VGNC:85708]
ENSSSCG00000017265	Upregulated	156229	12	-	12311293	12343200	TCONS_00041885	10	3972	XLOC_011810	AXIN2	axin 2 [Source:VGNC Symbol;Acc:VGNC:85708]
ENSSSCG00000017265	Upregulated	156230	12	-	12311293	12343200	TCONS_00041886	11	4158	XLOC_011810	AXIN2	axin 2 [Source:VGNC Symbol;Acc:VGNC:85708]
ENSSSCG00000017265	Upregulated	156231	12	-	12311293	12343200	TCONS_00041887	10	3972	XLOC_011810	AXIN2	axin 2 [Source:VGNC Symbol;Acc:VGNC:85708]
ENSSSCG00000017265	Upregulated	156232	12	-	12311293	12343200	TCONS_00041888	11	4158	XLOC_011810	AXIN2	axin 2 [Source:VGNC Symbol;Acc:VGNC:85708]
ENSSSCG00000017265	Upregulated	156233	12	+	12311321	12341370	TCONS_00035793	11	4299	XLOC_010381	AXIN2	axin 2 [Source:VGNC Symbol;Acc:VGNC:85708]
ENSSSCG00000017265	Upregulated	156234	12	+	12311321	12341370	TCONS_00035794	11	4303	XLOC_010381	AXIN2	axin 2 [Source:VGNC Symbol;Acc:VGNC:85708]
ENSSSCG00000017265	Upregulated	156235	12	+	12311321	12341577	TCONS_00035795	11	4049	XLOC_010381	AXIN2	axin 2 [Source:VGNC Symbol;Acc:VGNC:85708]
ENSSSCG00000017265	Upregulated	156236	12	+	12311321	12342267	TCONS_00035796	11	4168	XLOC_010381	AXIN2	axin 2 [Source:VGNC Symbol;Acc:VGNC:85708]
ENSSSCG00000017265	Upregulated	156237	12	+	12311321	12342488	TCONS_00035797	11	4077	XLOC_010381	AXIN2	axin 2 [Source:VGNC Symbol;Acc:VGNC:85708]
ENSSSCG00000017265	Upregulated	156238	12	+	12311367	12318777	TCONS_00035798	3	1733	XLOC_010381	AXIN2	axin 2 [Source:VGNC Symbol;Acc:VGNC:85708]
ENSSSCG00000017265	Upregulated	156239	12	+	12311367	12342488	TCONS_00035799	10	3845	XLOC_010381	AXIN2	axin 2 [Source:VGNC Symbol;Acc:VGNC:85708]
ENSSSCG00000017265	Upregulated	156240	12	-	12315129	12343200	TCONS_00041889	11	3680	XLOC_011810	AXIN2	axin 2 [Source:VGNC Symbol;Acc:VGNC:85708]
ENSSSCG00000017265	Upregulated	156241	12	+	12320146	12341577	TCONS_00035800	6	1352	XLOC_010381	AXIN2	axin 2 [Source:VGNC Symbol;Acc:VGNC:85708]
ENSSSCG00000017265	Upregulated	156242	12	+	12320287	12343239	TCONS_00035801	5	1320	XLOC_010381	AXIN2	axin 2 [Source:VGNC Symbol;Acc:VGNC:85708]
ENSSSCG00000017265	Upregulated	156243	12	-	12334508	12342213	TCONS_00041890	3	1036	XLOC_011810	AXIN2	axin 2 [Source:VGNC Symbol;Acc:VGNC:85708]
ENSSSCG00000048895	Upregulated	36670	2	-	88022775	88098470	TCONS_00123776	12	8672	XLOC_033695	ENSSSCG00000048895
ENSSSCG00000048895	Upregulated	36671	2	-	88022775	88098493	TCONS_00123777	13	8895	XLOC_033695	ENSSSCG00000048895
ENSSSCG00000048895	Upregulated	36672	2	-	88022775	88098504	TCONS_00123778	11	9036	XLOC_033695	ENSSSCG00000048895
ENSSSCG00000048895	Upregulated	36673	2	-	88022775	88098505	TCONS_00123779	14	8607	XLOC_033695	ENSSSCG00000048895
ENSSSCG00000048895	Upregulated	36674	2	-	88022775	88098505	TCONS_00123780	11	8931	XLOC_033695	ENSSSCG00000048895
ENSSSCG00000048895	Upregulated	36675	2	-	88022775	88098539	TCONS_00123781	15	8981	XLOC_033695	ENSSSCG00000048895
ENSSSCG00000048895	Upregulated	36676	2	-	88022775	88098599	TCONS_00123782	12	9036	XLOC_033695	ENSSSCG00000048895
ENSSSCG00000048895	Upregulated	36678	2	-	88043361	88046305	TCONS_00123783	3	2860	XLOC_033695	ENSSSCG00000048895
ENSSSCG00000048895	Upregulated	36679	2	-	88043361	88098493	TCONS_00123784	10	7938	XLOC_033695	ENSSSCG00000048895
ENSSSCG00000017422	Upregulated	158047	12	-	20872155	20881650	TCONS_00042764	10	2671	XLOC_011988	FKBP10	FKBP prolyl isomerase 10 [Source:VGNC Symbol;Acc:VGNC:88143]
ENSSSCG00000017422	Upregulated	158048	12	-	20872155	20882644	TCONS_00042765	11	2571	XLOC_011988	FKBP10	FKBP prolyl isomerase 10 [Source:VGNC Symbol;Acc:VGNC:88143]
ENSSSCG00000017422	Upregulated	158049	12	-	20872163	20882644	TCONS_00042766	11	2578	XLOC_011988	FKBP10	FKBP prolyl isomerase 10 [Source:VGNC Symbol;Acc:VGNC:88143]
ENSSSCG00000037132	Upregulated	90928	6	+	49710999	49825811	TCONS_00171922	19	3249	XLOC_046652	POU2F2	POU class 2 homeobox 2 [Source:VGNC Symbol;Acc:VGNC:91673]
ENSSSCG00000037132	Upregulated	90930	6	-	49711019	49824689	TCONS_00182680	5	4014	XLOC_049418	POU2F2	POU class 2 homeobox 2 [Source:VGNC Symbol;Acc:VGNC:91673]
ENSSSCG00000037132	Upregulated	90931	6	-	49712023	49799816	TCONS_00182681	8	2909	XLOC_049418	POU2F2	POU class 2 homeobox 2 [Source:VGNC Symbol;Acc:VGNC:91673]
ENSSSCG00000037132	Upregulated	90932	6	-	49718640	49764949	TCONS_00182682	3	2985	XLOC_049418	POU2F2	POU class 2 homeobox 2 [Source:VGNC Symbol;Acc:VGNC:91673]
ENSSSCG00000037132	Upregulated	90934	6	-	49723686	49764995	TCONS_00182683	3	3015	XLOC_049418	POU2F2	POU class 2 homeobox 2 [Source:VGNC Symbol;Acc:VGNC:91673]
ENSSSCG00000037132	Upregulated	90935	6	-	49723795	49730499	TCONS_00182684	1	6705	XLOC_049418	POU2F2	POU class 2 homeobox 2 [Source:VGNC Symbol;Acc:VGNC:91673]
ENSSSCG00000037132	Upregulated	90937	6	+	49729063	49825829	TCONS_00171926	18	2839	XLOC_046652	POU2F2	POU class 2 homeobox 2 [Source:VGNC Symbol;Acc:VGNC:91673]
ENSSSCG00000037132	Upregulated	90938	6	+	49748272	49825829	TCONS_00171927	17	2485	XLOC_046652	POU2F2	POU class 2 homeobox 2 [Source:VGNC Symbol;Acc:VGNC:91673]
ENSSSCG00000037132	Upregulated	90939	6	+	49748295	49825812	TCONS_00171928	14	2470	XLOC_046652	POU2F2	POU class 2 homeobox 2 [Source:VGNC Symbol;Acc:VGNC:91673]
ENSSSCG00000037132	Upregulated	90940	6	+	49791944	49825829	TCONS_00171929	16	2347	XLOC_046652	POU2F2	POU class 2 homeobox 2 [Source:VGNC Symbol;Acc:VGNC:91673]
ENSSSCG00000037132	Upregulated	90941	6	+	49791979	49827560	TCONS_00171930	14	1448	XLOC_046652	POU2F2	POU class 2 homeobox 2 [Source:VGNC Symbol;Acc:VGNC:91673]
ENSSSCG00000037132	Upregulated	90942	6	+	49791991	49825829	TCONS_00171931	13	1845	XLOC_046652	POU2F2	POU class 2 homeobox 2 [Source:VGNC Symbol;Acc:VGNC:91673]
ENSSSCG00000037132	Upregulated	90944	6	+	49798416	49825829	TCONS_00171932	14	1904	XLOC_046652	POU2F2	POU class 2 homeobox 2 [Source:VGNC Symbol;Acc:VGNC:91673]
ENSSSCG00000016625	Upregulated	223396	18	+	28130241	28573163	TCONS_00102926	25	5881	XLOC_028260	CTTNBP2	cortactin binding protein 2 [Source:HGNC Symbol;Acc:HGNC:15679]
ENSSSCG00000016625	Upregulated	223397	18	+	28130241	28573163	TCONS_00102927	26	6014	XLOC_028260	CTTNBP2	cortactin binding protein 2 [Source:HGNC Symbol;Acc:HGNC:15679]
ENSSSCG00000016625	Upregulated	223398	18	+	28130241	28573163	TCONS_00102928	24	5982	XLOC_028260	CTTNBP2	cortactin binding protein 2 [Source:HGNC Symbol;Acc:HGNC:15679]
ENSSSCG00000016625	Upregulated	223399	18	+	28130442	28573163	TCONS_00102929	25	5914	XLOC_028260	CTTNBP2	cortactin binding protein 2 [Source:HGNC Symbol;Acc:HGNC:15679]
ENSSSCG00000016625	Upregulated	223402	18	+	28403391	28573163	TCONS_00102932	24	5542	XLOC_028260	CTTNBP2	cortactin binding protein 2 [Source:HGNC Symbol;Acc:HGNC:15679]
ENSSSCG00000016625	Upregulated	223403	18	+	28403391	28573163	TCONS_00102933	22	5418	XLOC_028260	CTTNBP2	cortactin binding protein 2 [Source:HGNC Symbol;Acc:HGNC:15679]
ENSSSCG00000016625	Upregulated	223404	18	+	28403391	28573163	TCONS_00102934	24	5705	XLOC_028260	CTTNBP2	cortactin binding protein 2 [Source:HGNC Symbol;Acc:HGNC:15679]
ENSSSCG00000016625	Upregulated	223405	18	+	28403391	28573163	TCONS_00102935	23	5806	XLOC_028260	CTTNBP2	cortactin binding protein 2 [Source:HGNC Symbol;Acc:HGNC:15679]
ENSSSCG00000016625	Upregulated	223406	18	+	28415037	28573158	TCONS_00102936	23	5950	XLOC_028260	CTTNBP2	cortactin binding protein 2 [Source:HGNC Symbol;Acc:HGNC:15679]
ENSSSCG00000016625	Upregulated	223407	18	+	28415037	28573163	TCONS_00102937	24	5854	XLOC_028260	CTTNBP2	cortactin binding protein 2 [Source:HGNC Symbol;Acc:HGNC:15679]
ENSSSCG00000016625	Upregulated	223408	18	+	28415037	28573163	TCONS_00102938	24	5691	XLOC_028260	CTTNBP2	cortactin binding protein 2 [Source:HGNC Symbol;Acc:HGNC:15679]
ENSSSCG00000016625	Upregulated	223409	18	-	28415176	28573062	TCONS_00105481	23	4826	XLOC_029004	CTTNBP2	cortactin binding protein 2 [Source:HGNC Symbol;Acc:HGNC:15679]
ENSSSCG00000016625	Upregulated	223410	18	-	28415176	28573108	TCONS_00105482	21	5065	XLOC_029004	CTTNBP2	cortactin binding protein 2 [Source:HGNC Symbol;Acc:HGNC:15679]
ENSSSCG00000016625	Upregulated	223411	18	-	28415176	28573111	TCONS_00105483	23	5310	XLOC_029004	CTTNBP2	cortactin binding protein 2 [Source:HGNC Symbol;Acc:HGNC:15679]
ENSSSCG00000016625	Upregulated	223412	18	-	28415176	28573114	TCONS_00105484	23	4882	XLOC_029004	CTTNBP2	cortactin binding protein 2 [Source:HGNC Symbol;Acc:HGNC:15679]
ENSSSCG00000016625	Upregulated	223413	18	-	28415176	28573117	TCONS_00105485	23	5020	XLOC_029004	CTTNBP2	cortactin binding protein 2 [Source:HGNC Symbol;Acc:HGNC:15679]
ENSSSCG00000016625	Upregulated	223414	18	-	28415176	28573123	TCONS_00105486	21	3894	XLOC_029004	CTTNBP2	cortactin binding protein 2 [Source:HGNC Symbol;Acc:HGNC:15679]
ENSSSCG00000016625	Upregulated	223415	18	-	28415176	28573131	TCONS_00105487	23	5784	XLOC_029004	CTTNBP2	cortactin binding protein 2 [Source:HGNC Symbol;Acc:HGNC:15679]
ENSSSCG00000016625	Upregulated	223416	18	-	28496526	28573111	TCONS_00105488	20	4359	XLOC_029004	CTTNBP2	cortactin binding protein 2 [Source:HGNC Symbol;Acc:HGNC:15679]
ENSSSCG00000016625	Upregulated	223417	18	-	28502166	28573095	TCONS_00105489	20	5355	XLOC_029004	CTTNBP2	cortactin binding protein 2 [Source:HGNC Symbol;Acc:HGNC:15679]
ENSSSCG00000016625	Upregulated	223418	18	-	28502166	28573096	TCONS_00105490	18	5253	XLOC_029004	CTTNBP2	cortactin binding protein 2 [Source:HGNC Symbol;Acc:HGNC:15679]
ENSSSCG00000016625	Upregulated	223419	18	-	28502166	28573103	TCONS_00105491	19	5537	XLOC_029004	CTTNBP2	cortactin binding protein 2 [Source:HGNC Symbol;Acc:HGNC:15679]
ENSSSCG00000016625	Upregulated	223420	18	-	28502166	28573111	TCONS_00105492	19	5444	XLOC_029004	CTTNBP2	cortactin binding protein 2 [Source:HGNC Symbol;Acc:HGNC:15679]
ENSSSCG00000016625	Upregulated	223421	18	-	28502166	28573122	TCONS_00105493	19	5452	XLOC_029004	CTTNBP2	cortactin binding protein 2 [Source:HGNC Symbol;Acc:HGNC:15679]
ENSSSCG00000016625	Upregulated	223422	18	-	28502166	28573123	TCONS_00105494	19	5560	XLOC_029004	CTTNBP2	cortactin binding protein 2 [Source:HGNC Symbol;Acc:HGNC:15679]
ENSSSCG00000016625	Upregulated	223423	18	-	28502166	28573128	TCONS_00105495	19	5380	XLOC_029004	CTTNBP2	cortactin binding protein 2 [Source:HGNC Symbol;Acc:HGNC:15679]
ENSSSCG00000016625	Upregulated	223424	18	+	28543708	28573163	TCONS_00102939	11	2353	XLOC_028260	CTTNBP2	cortactin binding protein 2 [Source:HGNC Symbol;Acc:HGNC:15679]
ENSSSCG00000005620	Upregulated	20797	1	-	268237679	268252767	TCONS_00021424	10	4485	XLOC_005911	SH2D3C	SH2 domain containing 3C [Source:VGNC Symbol;Acc:VGNC:92810]
ENSSSCG00000005620	Upregulated	20798	1	-	268237679	268270359	TCONS_00021425	12	5540	XLOC_005911	SH2D3C	SH2 domain containing 3C [Source:VGNC Symbol;Acc:VGNC:92810]
ENSSSCG00000005620	Upregulated	20799	1	-	268237679	268270361	TCONS_00021426	12	7077	XLOC_005911	SH2D3C	SH2 domain containing 3C [Source:VGNC Symbol;Acc:VGNC:92810]
ENSSSCG00000005620	Upregulated	20800	1	-	268238984	268270361	TCONS_00021427	12	5772	XLOC_005911	SH2D3C	SH2 domain containing 3C [Source:VGNC Symbol;Acc:VGNC:92810]
ENSSSCG00000005620	Upregulated	20801	1	-	268239009	268266285	TCONS_00021428	12	2453	XLOC_005911	SH2D3C	SH2 domain containing 3C [Source:VGNC Symbol;Acc:VGNC:92810]
ENSSSCG00000005620	Upregulated	20802	1	+	268239020	268254594	TCONS_00010260	10	2501	XLOC_002861	SH2D3C	SH2 domain containing 3C [Source:VGNC Symbol;Acc:VGNC:92810]
ENSSSCG00000005620	Upregulated	20803	1	+	268240915	268248803	TCONS_00010261	7	1490	XLOC_002861	SH2D3C	SH2 domain containing 3C [Source:VGNC Symbol;Acc:VGNC:92810]
ENSSSCG00000005620	Upregulated	20804	1	+	268240941	268248803	TCONS_00010262	7	1464	XLOC_002861	SH2D3C	SH2 domain containing 3C [Source:VGNC Symbol;Acc:VGNC:92810]
ENSSSCG00000005620	Upregulated	20805	1	-	268242826	268245173	TCONS_00021429	2	454	XLOC_005912	SH2D3C	SH2 domain containing 3C [Source:VGNC Symbol;Acc:VGNC:92810]
ENSSSCG00000005620	Upregulated	20806	1	+	268242852	268245598	TCONS_00010263	2	1047	XLOC_002862	SH2D3C	SH2 domain containing 3C [Source:VGNC Symbol;Acc:VGNC:92810]
ENSSSCG00000005620	Upregulated	20807	1	+	268254899	268267781	TCONS_00010264	2	2362	XLOC_002863	SH2D3C	SH2 domain containing 3C [Source:VGNC Symbol;Acc:VGNC:92810]
ENSSSCG00000005620	Upregulated	20808	1	+	268254949	268266276	TCONS_00010265	2	2362	XLOC_002863	SH2D3C	SH2 domain containing 3C [Source:VGNC Symbol;Acc:VGNC:92810]
ENSSSCG00000005620	Upregulated	20809	1	+	268254972	268266276	TCONS_00010266	3	1842	XLOC_002863	SH2D3C	SH2 domain containing 3C [Source:VGNC Symbol;Acc:VGNC:92810]
ENSSSCG00000005620	Upregulated	20810	1	+	268254976	268257419	TCONS_00010267	2	2251	XLOC_002863	SH2D3C	SH2 domain containing 3C [Source:VGNC Symbol;Acc:VGNC:92810]
ENSSSCG00000008618	Upregulated	57467	3	-	121542275	121549491	TCONS_00142474	3	3877	XLOC_038602	MYCN	MYCN proto-onco, bHLH transcription factor [Source:VGNC Symbol;Acc:VGNC:90504]
ENSSSCG00000008618	Upregulated	57468	3	-	121542275	121549491	TCONS_00142475	3	3877	XLOC_038602	MYCN	MYCN proto-onco, bHLH transcription factor [Source:VGNC Symbol;Acc:VGNC:90504]
ENSSSCG00000008618	Upregulated	57469	3	-	121542275	121549491	TCONS_00142476	3	3877	XLOC_038602	MYCN	MYCN proto-onco, bHLH transcription factor [Source:VGNC Symbol;Acc:VGNC:90504]
ENSSSCG00000040053	Upregulated	223709	18	-	33183909	33190832	TCONS_00105684	5	2682	XLOC_029041	LSMEM1	leucine rich single-pass membrane protein 1 [Source:VGNC Symbol;Acc:VGNC:89878]
ENSSSCG00000040053	Upregulated	223710	18	-	33183909	33191271	TCONS_00105685	4	4051	XLOC_029041	LSMEM1	leucine rich single-pass membrane protein 1 [Source:VGNC Symbol;Acc:VGNC:89878]
ENSSSCG00000040053	Upregulated	223711	18	-	33183909	33194099	TCONS_00105686	2	7850	XLOC_029041	LSMEM1	leucine rich single-pass membrane protein 1 [Source:VGNC Symbol;Acc:VGNC:89878]
ENSSSCG00000040053	Upregulated	223712	18	-	33183909	33195396	TCONS_00105687	3	3462	XLOC_029041	LSMEM1	leucine rich single-pass membrane protein 1 [Source:VGNC Symbol;Acc:VGNC:89878]
ENSSSCG00000040053	Upregulated	223713	18	-	33183909	33195703	TCONS_00105688	4	5017	XLOC_029041	LSMEM1	leucine rich single-pass membrane protein 1 [Source:VGNC Symbol;Acc:VGNC:89878]
ENSSSCG00000040053	Upregulated	223714	18	+	33184062	33195572	TCONS_00103036	3	2039	XLOC_028301	LSMEM1	leucine rich single-pass membrane protein 1 [Source:VGNC Symbol;Acc:VGNC:89878]
ENSSSCG00000040053	Upregulated	223715	18	-	33184167	33190832	TCONS_00105689	3	2106	XLOC_029041	LSMEM1	leucine rich single-pass membrane protein 1 [Source:VGNC Symbol;Acc:VGNC:89878]
ENSSSCG00000040053	Upregulated	223716	18	+	33185790	33195572	TCONS_00103037	2	2172	XLOC_028301	LSMEM1	leucine rich single-pass membrane protein 1 [Source:VGNC Symbol;Acc:VGNC:89878]
ENSSSCG00000029626	Upregulated	216809	17	-	37160181	37163553	TCONS_00099643	7	1492	XLOC_027365	NECAB3	N-terminal EF-hand calcium binding protein 3 [Source:VGNC Symbol;Acc:VGNC:95670]
ENSSSCG00000029626	Upregulated	216810	17	-	37160181	37163757	TCONS_00099644	8	2282	XLOC_027365	NECAB3	N-terminal EF-hand calcium binding protein 3 [Source:VGNC Symbol;Acc:VGNC:95670]
ENSSSCG00000029626	Upregulated	216811	17	-	37160181	37177048	TCONS_00099645	13	2008	XLOC_027365	NECAB3	N-terminal EF-hand calcium binding protein 3 [Source:VGNC Symbol;Acc:VGNC:95670]
ENSSSCG00000029626	Upregulated	216812	17	-	37160181	37177278	TCONS_00099646	13	2391	XLOC_027365	NECAB3	N-terminal EF-hand calcium binding protein 3 [Source:VGNC Symbol;Acc:VGNC:95670]
ENSSSCG00000029626	Upregulated	216813	17	-	37160181	37177278	TCONS_00099647	13	2141	XLOC_027365	NECAB3	N-terminal EF-hand calcium binding protein 3 [Source:VGNC Symbol;Acc:VGNC:95670]
ENSSSCG00000029626	Upregulated	216814	17	-	37160181	37177278	TCONS_00099648	13	2636	XLOC_027365	NECAB3	N-terminal EF-hand calcium binding protein 3 [Source:VGNC Symbol;Acc:VGNC:95670]
ENSSSCG00000029626	Upregulated	216815	17	-	37160181	37177278	TCONS_00099649	12	2408	XLOC_027365	NECAB3	N-terminal EF-hand calcium binding protein 3 [Source:VGNC Symbol;Acc:VGNC:95670]
ENSSSCG00000029626	Upregulated	216816	17	-	37160181	37177278	TCONS_00099650	13	2636	XLOC_027365	NECAB3	N-terminal EF-hand calcium binding protein 3 [Source:VGNC Symbol;Acc:VGNC:95670]
ENSSSCG00000029626	Upregulated	216817	17	-	37160181	37177278	TCONS_00099651	13	2636	XLOC_027365	NECAB3	N-terminal EF-hand calcium binding protein 3 [Source:VGNC Symbol;Acc:VGNC:95670]
ENSSSCG00000029626	Upregulated	216818	17	-	37160181	37177278	TCONS_00099652	13	2636	XLOC_027365	NECAB3	N-terminal EF-hand calcium binding protein 3 [Source:VGNC Symbol;Acc:VGNC:95670]
ENSSSCG00000029626	Upregulated	216819	17	-	37160181	37177525	TCONS_00099653	13	2045	XLOC_027365	NECAB3	N-terminal EF-hand calcium binding protein 3 [Source:VGNC Symbol;Acc:VGNC:95670]
ENSSSCG00000029626	Upregulated	216820	17	-	37160181	37177701	TCONS_00099654	12	2729	XLOC_027365	NECAB3	N-terminal EF-hand calcium binding protein 3 [Source:VGNC Symbol;Acc:VGNC:95670]
ENSSSCG00000029626	Upregulated	216821	17	+	37160206	37163185	TCONS_00095950	7	1503	XLOC_026359	NECAB3	N-terminal EF-hand calcium binding protein 3 [Source:VGNC Symbol;Acc:VGNC:95670]
ENSSSCG00000029626	Upregulated	216833	17	-	37160434	37177278	TCONS_00099655	13	1985	XLOC_027365	NECAB3	N-terminal EF-hand calcium binding protein 3 [Source:VGNC Symbol;Acc:VGNC:95670]
ENSSSCG00000029626	Upregulated	216834	17	+	37160442	37162093	TCONS_00095962	3	1043	XLOC_026359	NECAB3	N-terminal EF-hand calcium binding protein 3 [Source:VGNC Symbol;Acc:VGNC:95670]
ENSSSCG00000029626	Upregulated	216835	17	+	37160459	37163185	TCONS_00095963	6	1325	XLOC_026359	NECAB3	N-terminal EF-hand calcium binding protein 3 [Source:VGNC Symbol;Acc:VGNC:95670]
ENSSSCG00000027768	Upregulated	42567	3	+	3851302	3878252	TCONS_00126788	11	2776	XLOC_034601	SLC29A4	solute carrier family 29 member 4 [Source:VGNC Symbol;Acc:VGNC:93045]
ENSSSCG00000027768	Upregulated	42568	3	+	3851327	3873713	TCONS_00126789	9	1709	XLOC_034601	SLC29A4	solute carrier family 29 member 4 [Source:VGNC Symbol;Acc:VGNC:93045]
ENSSSCG00000027768	Upregulated	42569	3	+	3851327	3878252	TCONS_00126790	14	3040	XLOC_034601	SLC29A4	solute carrier family 29 member 4 [Source:VGNC Symbol;Acc:VGNC:93045]
ENSSSCG00000027768	Upregulated	42570	3	+	3851327	3878252	TCONS_00126791	13	2927	XLOC_034601	SLC29A4	solute carrier family 29 member 4 [Source:VGNC Symbol;Acc:VGNC:93045]
ENSSSCG00000027768	Upregulated	42571	3	-	3853795	3873616	TCONS_00134984	9	1987	XLOC_036734	SLC29A4	solute carrier family 29 member 4 [Source:VGNC Symbol;Acc:VGNC:93045]
ENSSSCG00000027768	Upregulated	42573	3	+	3854487	3878252	TCONS_00126793	11	2688	XLOC_034601	SLC29A4	solute carrier family 29 member 4 [Source:VGNC Symbol;Acc:VGNC:93045]
ENSSSCG00000027768	Upregulated	42574	3	+	3854547	3873713	TCONS_00126794	7	1978	XLOC_034601	SLC29A4	solute carrier family 29 member 4 [Source:VGNC Symbol;Acc:VGNC:93045]
ENSSSCG00000027768	Upregulated	42576	3	+	3854608	3878252	TCONS_00126796	12	2879	XLOC_034601	SLC29A4	solute carrier family 29 member 4 [Source:VGNC Symbol;Acc:VGNC:93045]
ENSSSCG00000027768	Upregulated	42577	3	+	3854631	3873713	TCONS_00126797	8	1638	XLOC_034601	SLC29A4	solute carrier family 29 member 4 [Source:VGNC Symbol;Acc:VGNC:93045]
ENSSSCG00000027768	Upregulated	42578	3	+	3854690	3878252	TCONS_00126798	12	2792	XLOC_034601	SLC29A4	solute carrier family 29 member 4 [Source:VGNC Symbol;Acc:VGNC:93045]
ENSSSCG00000027768	Upregulated	42579	3	+	3854742	3878252	TCONS_00126799	11	2631	XLOC_034601	SLC29A4	solute carrier family 29 member 4 [Source:VGNC Symbol;Acc:VGNC:93045]
ENSSSCG00000027768	Upregulated	42580	3	+	3854751	3878252	TCONS_00126800	13	2923	XLOC_034601	SLC29A4	solute carrier family 29 member 4 [Source:VGNC Symbol;Acc:VGNC:93045]
ENSSSCG00000027768	Upregulated	42585	3	+	3862251	3873713	TCONS_00126804	7	2225	XLOC_034601	SLC29A4	solute carrier family 29 member 4 [Source:VGNC Symbol;Acc:VGNC:93045]
ENSSSCG00000027768	Upregulated	42586	3	+	3862251	3873713	TCONS_00126805	8	1768	XLOC_034601	SLC29A4	solute carrier family 29 member 4 [Source:VGNC Symbol;Acc:VGNC:93045]
ENSSSCG00000027768	Upregulated	42587	3	+	3862251	3873713	TCONS_00126806	8	1763	XLOC_034601	SLC29A4	solute carrier family 29 member 4 [Source:VGNC Symbol;Acc:VGNC:93045]
ENSSSCG00000027768	Upregulated	42588	3	+	3862251	3878239	TCONS_00126807	12	2968	XLOC_034601	SLC29A4	solute carrier family 29 member 4 [Source:VGNC Symbol;Acc:VGNC:93045]
ENSSSCG00000027768	Upregulated	42589	3	+	3862251	3878239	TCONS_00126808	11	2854	XLOC_034601	SLC29A4	solute carrier family 29 member 4 [Source:VGNC Symbol;Acc:VGNC:93045]
ENSSSCG00000027768	Upregulated	42590	3	-	3862489	3873679	TCONS_00134986	8	1491	XLOC_036734	SLC29A4	solute carrier family 29 member 4 [Source:VGNC Symbol;Acc:VGNC:93045]
ENSSSCG00000027768	Upregulated	42591	3	-	3862489	3873679	TCONS_00134987	8	1496	XLOC_036734	SLC29A4	solute carrier family 29 member 4 [Source:VGNC Symbol;Acc:VGNC:93045]
ENSSSCG00000027768	Upregulated	42592	3	-	3862489	3877116	TCONS_00134988	12	1607	XLOC_036734	SLC29A4	solute carrier family 29 member 4 [Source:VGNC Symbol;Acc:VGNC:93045]
ENSSSCG00000027768	Upregulated	42593	3	+	3865937	3878252	TCONS_00126809	11	2560	XLOC_034601	SLC29A4	solute carrier family 29 member 4 [Source:VGNC Symbol;Acc:VGNC:93045]
ENSSSCG00000027768	Upregulated	42594	3	-	3866096	3873679	TCONS_00134989	5	1805	XLOC_036734	SLC29A4	solute carrier family 29 member 4 [Source:VGNC Symbol;Acc:VGNC:93045]
ENSSSCG00000027768	Upregulated	42595	3	-	3866096	3873679	TCONS_00134990	6	1491	XLOC_036734	SLC29A4	solute carrier family 29 member 4 [Source:VGNC Symbol;Acc:VGNC:93045]
ENSSSCG00000027768	Upregulated	42596	3	-	3866096	3873679	TCONS_00134991	5	1810	XLOC_036734	SLC29A4	solute carrier family 29 member 4 [Source:VGNC Symbol;Acc:VGNC:93045]
ENSSSCG00000027768	Upregulated	42598	3	+	3869943	3873713	TCONS_00126810	4	1056	XLOC_034601	SLC29A4	solute carrier family 29 member 4 [Source:VGNC Symbol;Acc:VGNC:93045]
ENSSSCG00000027768	Upregulated	42599	3	-	3877238	3878248	TCONS_00134993	1	1011	XLOC_036737	SLC29A4	solute carrier family 29 member 4 [Source:VGNC Symbol;Acc:VGNC:93045]
ENSSSCG00000040815	Upregulated	195936	14	+	120906343	120919384	TCONS_00070399	5	2364	XLOC_019171	DUSP5	dual specificity phosphatase 5 [Source:VGNC Symbol;Acc:VGNC:87487]
ENSSSCG00000040815	Upregulated	195937	14	+	120906343	120919395	TCONS_00070400	4	2434	XLOC_019171	DUSP5	dual specificity phosphatase 5 [Source:VGNC Symbol;Acc:VGNC:87487]
ENSSSCG00000040815	Upregulated	195938	14	+	120906343	120919620	TCONS_00070401	7	2454	XLOC_019171	DUSP5	dual specificity phosphatase 5 [Source:VGNC Symbol;Acc:VGNC:87487]
ENSSSCG00000040815	Upregulated	195939	14	-	120906540	120919360	TCONS_00077879	5	1569	XLOC_021010	DUSP5	dual specificity phosphatase 5 [Source:VGNC Symbol;Acc:VGNC:87487]
ENSSSCG00000040815	Upregulated	195940	14	-	120906540	120919438	TCONS_00077880	7	2039	XLOC_021010	DUSP5	dual specificity phosphatase 5 [Source:VGNC Symbol;Acc:VGNC:87487]
ENSSSCG00000040815	Upregulated	195941	14	+	120906971	120919620	TCONS_00070402	4	2267	XLOC_019171	DUSP5	dual specificity phosphatase 5 [Source:VGNC Symbol;Acc:VGNC:87487]
ENSSSCG00000040815	Upregulated	195942	14	+	120909220	120926046	TCONS_00070403	2	443	XLOC_019172	DUSP5	dual specificity phosphatase 5 [Source:VGNC Symbol;Acc:VGNC:87487]
ENSSSCG00000040815	Upregulated	195943	14	+	120911289	120919620	TCONS_00070404	3	1934	XLOC_019171	DUSP5	dual specificity phosphatase 5 [Source:VGNC Symbol;Acc:VGNC:87487]
ENSSSCG00000040815	Upregulated	195944	14	+	120912219	120919620	TCONS_00070405	3	1990	XLOC_019171	DUSP5	dual specificity phosphatase 5 [Source:VGNC Symbol;Acc:VGNC:87487]
ENSSSCG00000040815	Upregulated	195945	14	+	120913191	120919620	TCONS_00070406	3	2161	XLOC_019171	DUSP5	dual specificity phosphatase 5 [Source:VGNC Symbol;Acc:VGNC:87487]
ENSSSCG00000009859	Upregulated	186748	14	+	35381918	35436842	TCONS_00065821	8	726	XLOC_018088	TESC	tescalcin [Source:HGNC Symbol;Acc:HGNC:26065]
ENSSSCG00000009859	Upregulated	186749	14	+	35381918	35438252	TCONS_00065822	7	734	XLOC_018088	TESC	tescalcin [Source:HGNC Symbol;Acc:HGNC:26065]
ENSSSCG00000009859	Upregulated	186750	14	+	35381918	35438427	TCONS_00065823	9	1035	XLOC_018088	TESC	tescalcin [Source:HGNC Symbol;Acc:HGNC:26065]
ENSSSCG00000009859	Upregulated	186751	14	+	35381918	35445449	TCONS_00065824	14	2740	XLOC_018088	TESC	tescalcin [Source:HGNC Symbol;Acc:HGNC:26065]
ENSSSCG00000009859	Upregulated	186752	14	+	35381918	35452717	TCONS_00065825	13	5317	XLOC_018088	TESC	tescalcin [Source:HGNC Symbol;Acc:HGNC:26065]
ENSSSCG00000009859	Upregulated	186753	14	+	35381918	35513023	TCONS_00065826	16	3063	XLOC_018088	TESC	tescalcin [Source:HGNC Symbol;Acc:HGNC:26065]
ENSSSCG00000009859	Upregulated	186754	14	+	35381924	35452207	TCONS_00065827	14	4849	XLOC_018088	TESC	tescalcin [Source:HGNC Symbol;Acc:HGNC:26065]
ENSSSCG00000009859	Upregulated	186755	14	+	35381933	35452207	TCONS_00065828	15	4936	XLOC_018088	TESC	tescalcin [Source:HGNC Symbol;Acc:HGNC:26065]
ENSSSCG00000009859	Upregulated	186756	14	-	35381935	35438685	TCONS_00073280	8	1198	XLOC_019911	TESC	tescalcin [Source:HGNC Symbol;Acc:HGNC:26065]
ENSSSCG00000009859	Upregulated	186757	14	+	35381978	35445449	TCONS_00065829	12	2521	XLOC_018088	TESC	tescalcin [Source:HGNC Symbol;Acc:HGNC:26065]
ENSSSCG00000009859	Upregulated	186758	14	-	35382234	35438346	TCONS_00073281	7	669	XLOC_019911	TESC	tescalcin [Source:HGNC Symbol;Acc:HGNC:26065]
ENSSSCG00000009859	Upregulated	186759	14	-	35382234	35438418	TCONS_00073282	8	822	XLOC_019911	TESC	tescalcin [Source:HGNC Symbol;Acc:HGNC:26065]
ENSSSCG00000009859	Upregulated	186762	14	+	35445985	35452717	TCONS_00065830	4	3225	XLOC_018088	TESC	tescalcin [Source:HGNC Symbol;Acc:HGNC:26065]
ENSSSCG00000009859	Upregulated	186764	14	-	35449412	35452271	TCONS_00073286	2	2061	XLOC_019913	TESC	tescalcin [Source:HGNC Symbol;Acc:HGNC:26065]
ENSSSCG00000017589	Upregulated	159416	12	-	26131128	26231409	TCONS_00043414	2	1445	XLOC_012225	DLX3	distal-less homeobox 3 [Source:VGNC Symbol;Acc:VGNC:87339]
ENSSSCG00000017589	Upregulated	159451	12	-	26177888	26231060	TCONS_00043433	2	1724	XLOC_012236	DLX3	distal-less homeobox 3 [Source:VGNC Symbol;Acc:VGNC:87339]
ENSSSCG00000017589	Upregulated	159452	12	+	26177898	26183149	TCONS_00037463	7	2141	XLOC_010738	DLX3	distal-less homeobox 3 [Source:VGNC Symbol;Acc:VGNC:87339]
ENSSSCG00000017589	Upregulated	159453	12	-	26177900	26183157	TCONS_00043434	4	2669	XLOC_012236	DLX3	distal-less homeobox 3 [Source:VGNC Symbol;Acc:VGNC:87339]
ENSSSCG00000017589	Upregulated	159454	12	-	26177900	26183178	TCONS_00043435	3	2638	XLOC_012236	DLX3	distal-less homeobox 3 [Source:VGNC Symbol;Acc:VGNC:87339]
ENSSSCG00000017589	Upregulated	159455	12	+	26177909	26181435	TCONS_00037464	3	1296	XLOC_010738	DLX3	distal-less homeobox 3 [Source:VGNC Symbol;Acc:VGNC:87339]
ENSSSCG00000003684	Upregulated	100065	6	-	99062224	99081887	TCONS_00187296	6	3439	XLOC_050521	MTCL1	microtubule crosslinking factor 1 [Source:VGNC Symbol;Acc:VGNC:90438]
ENSSSCG00000003684	Upregulated	100066	6	-	99062224	99107327	TCONS_00187297	11	5337	XLOC_050521	MTCL1	microtubule crosslinking factor 1 [Source:VGNC Symbol;Acc:VGNC:90438]
ENSSSCG00000003684	Upregulated	100067	6	-	99062224	99177958	TCONS_00187298	15	6365	XLOC_050521	MTCL1	microtubule crosslinking factor 1 [Source:VGNC Symbol;Acc:VGNC:90438]
ENSSSCG00000003684	Upregulated	100068	6	-	99062224	99177958	TCONS_00187299	15	6365	XLOC_050521	MTCL1	microtubule crosslinking factor 1 [Source:VGNC Symbol;Acc:VGNC:90438]
ENSSSCG00000003684	Upregulated	100069	6	-	99062224	99177958	TCONS_00187300	15	6365	XLOC_050521	MTCL1	microtubule crosslinking factor 1 [Source:VGNC Symbol;Acc:VGNC:90438]
ENSSSCG00000003684	Upregulated	100070	6	-	99062224	99177958	TCONS_00187301	15	6368	XLOC_050521	MTCL1	microtubule crosslinking factor 1 [Source:VGNC Symbol;Acc:VGNC:90438]
ENSSSCG00000003684	Upregulated	100071	6	-	99062224	99177958	TCONS_00187302	15	6365	XLOC_050521	MTCL1	microtubule crosslinking factor 1 [Source:VGNC Symbol;Acc:VGNC:90438]
ENSSSCG00000003684	Upregulated	100072	6	-	99062224	99177958	TCONS_00187303	15	6365	XLOC_050521	MTCL1	microtubule crosslinking factor 1 [Source:VGNC Symbol;Acc:VGNC:90438]
ENSSSCG00000003684	Upregulated	100073	6	-	99062224	99179440	TCONS_00187304	14	5797	XLOC_050521	MTCL1	microtubule crosslinking factor 1 [Source:VGNC Symbol;Acc:VGNC:90438]
ENSSSCG00000003684	Upregulated	100074	6	-	99062354	99177958	TCONS_00187305	14	6160	XLOC_050521	MTCL1	microtubule crosslinking factor 1 [Source:VGNC Symbol;Acc:VGNC:90438]
ENSSSCG00000003684	Upregulated	100075	6	+	99062357	99079808	TCONS_00176427	4	7858	XLOC_047747	MTCL1	microtubule crosslinking factor 1 [Source:VGNC Symbol;Acc:VGNC:90438]
ENSSSCG00000003684	Upregulated	100076	6	+	99062357	99083318	TCONS_00176428	5	8164	XLOC_047747	MTCL1	microtubule crosslinking factor 1 [Source:VGNC Symbol;Acc:VGNC:90438]
ENSSSCG00000003684	Upregulated	100077	6	+	99062357	99084046	TCONS_00176429	4	7910	XLOC_047747	MTCL1	microtubule crosslinking factor 1 [Source:VGNC Symbol;Acc:VGNC:90438]
ENSSSCG00000003684	Upregulated	100078	6	+	99062357	99084046	TCONS_00176430	7	3040	XLOC_047747	MTCL1	microtubule crosslinking factor 1 [Source:VGNC Symbol;Acc:VGNC:90438]
ENSSSCG00000003684	Upregulated	100079	6	+	99062357	99177576	TCONS_00176431	15	5768	XLOC_047747	MTCL1	microtubule crosslinking factor 1 [Source:VGNC Symbol;Acc:VGNC:90438]
ENSSSCG00000003684	Upregulated	100080	6	+	99062357	99177576	TCONS_00176432	14	10739	XLOC_047747	MTCL1	microtubule crosslinking factor 1 [Source:VGNC Symbol;Acc:VGNC:90438]
ENSSSCG00000003684	Upregulated	100081	6	+	99062357	99177576	TCONS_00176433	15	6060	XLOC_047747	MTCL1	microtubule crosslinking factor 1 [Source:VGNC Symbol;Acc:VGNC:90438]
ENSSSCG00000003684	Upregulated	100082	6	+	99062359	99177576	TCONS_00176434	15	5848	XLOC_047747	MTCL1	microtubule crosslinking factor 1 [Source:VGNC Symbol;Acc:VGNC:90438]
ENSSSCG00000003684	Upregulated	100083	6	+	99062363	99102339	TCONS_00176435	8	3800	XLOC_047747	MTCL1	microtubule crosslinking factor 1 [Source:VGNC Symbol;Acc:VGNC:90438]
ENSSSCG00000003684	Upregulated	100084	6	+	99062363	99104110	TCONS_00176436	11	4544	XLOC_047747	MTCL1	microtubule crosslinking factor 1 [Source:VGNC Symbol;Acc:VGNC:90438]
ENSSSCG00000003684	Upregulated	100085	6	+	99062363	99177576	TCONS_00176437	16	5138	XLOC_047747	MTCL1	microtubule crosslinking factor 1 [Source:VGNC Symbol;Acc:VGNC:90438]
ENSSSCG00000047236	Upregulated	202461	15	+	77707976	77726616	TCONS_00081038	3	12881	XLOC_021945	ENSSSCG00000047236
ENSSSCG00000047236	Upregulated	202462	15	+	77708079	77726616	TCONS_00081039	3	12719	XLOC_021945	ENSSSCG00000047236
ENSSSCG00000047236	Upregulated	202463	15	+	77708316	77736952	TCONS_00081040	7	4022	XLOC_021945	ENSSSCG00000047236
ENSSSCG00000047236	Upregulated	202464	15	+	77708319	77726616	TCONS_00081041	5	15493	XLOC_021945	ENSSSCG00000047236
ENSSSCG00000047236	Upregulated	202465	15	+	77708319	77726616	TCONS_00081042	4	14283	XLOC_021945	ENSSSCG00000047236
ENSSSCG00000047236	Upregulated	202466	15	+	77708319	77726616	TCONS_00081043	6	14366	XLOC_021945	ENSSSCG00000047236
ENSSSCG00000047236	Upregulated	202468	15	-	77709674	77711469	TCONS_00086232	1	1796	XLOC_023371	ENSSSCG00000047236
ENSSSCG00000047236	Upregulated	202469	15	+	77709752	77726616	TCONS_00081044	3	14579	XLOC_021945	ENSSSCG00000047236
ENSSSCG00000047236	Upregulated	202470	15	+	77710637	77720208	TCONS_00081045	2	7348	XLOC_021945	ENSSSCG00000047236
ENSSSCG00000047236	Upregulated	202471	15	+	77710641	77720207	TCONS_00081046	4	6361	XLOC_021945	ENSSSCG00000047236
ENSSSCG00000047236	Upregulated	202472	15	+	77716136	77720207	TCONS_00081047	2	4010	XLOC_021945	ENSSSCG00000047236
ENSSSCG00000047236	Upregulated	202473	15	-	77717134	77728653	TCONS_00086233	2	3217	XLOC_023372	ENSSSCG00000047236
ENSSSCG00000047236	Upregulated	202474	15	-	77718675	77722973	TCONS_00086234	1	4299	XLOC_023373	ENSSSCG00000047236
ENSSSCG00000048060	Upregulated	209825	16	+	33565677	33571880	TCONS_00089845	2	5765	XLOC_024487	ENSSSCG00000048060
ENSSSCG00000048060	Upregulated	209826	16	-	33565687	33572703	TCONS_00092372	2	6578	XLOC_025286	ENSSSCG00000048060
ENSSSCG00000048060	Upregulated	209827	16	-	33565687	33572703	TCONS_00092373	1	7017	XLOC_025286	ENSSSCG00000048060
ENSSSCG00000011627	Upregulated	173069	13	-	73470811	73510785	TCONS_00058993	10	3023	XLOC_016130	ACP3	acid phosphatase 3 [Source:VGNC Symbol;Acc:VGNC:85025]
ENSSSCG00000011627	Upregulated	173070	13	-	73470811	73532905	TCONS_00058994	10	6180	XLOC_016130	ACP3	acid phosphatase 3 [Source:VGNC Symbol;Acc:VGNC:85025]
ENSSSCG00000011627	Upregulated	173071	13	-	73470811	73533812	TCONS_00058995	9	6954	XLOC_016130	ACP3	acid phosphatase 3 [Source:VGNC Symbol;Acc:VGNC:85025]
ENSSSCG00000011627	Upregulated	173072	13	-	73470811	73533870	TCONS_00058996	11	7307	XLOC_016130	ACP3	acid phosphatase 3 [Source:VGNC Symbol;Acc:VGNC:85025]
ENSSSCG00000011627	Upregulated	173073	13	-	73470811	73533924	TCONS_00058997	11	7282	XLOC_016130	ACP3	acid phosphatase 3 [Source:VGNC Symbol;Acc:VGNC:85025]
ENSSSCG00000011627	Upregulated	173074	13	-	73470811	73533948	TCONS_00058998	12	7468	XLOC_016130	ACP3	acid phosphatase 3 [Source:VGNC Symbol;Acc:VGNC:85025]
ENSSSCG00000011627	Upregulated	173075	13	-	73470811	73533966	TCONS_00058999	12	7357	XLOC_016130	ACP3	acid phosphatase 3 [Source:VGNC Symbol;Acc:VGNC:85025]
ENSSSCG00000011627	Upregulated	173076	13	-	73470811	73533966	TCONS_00059000	13	7382	XLOC_016130	ACP3	acid phosphatase 3 [Source:VGNC Symbol;Acc:VGNC:85025]
ENSSSCG00000011627	Upregulated	173077	13	-	73470811	73533980	TCONS_00059001	11	7338	XLOC_016130	ACP3	acid phosphatase 3 [Source:VGNC Symbol;Acc:VGNC:85025]
ENSSSCG00000011627	Upregulated	173078	13	-	73470811	73534124	TCONS_00059002	12	7651	XLOC_016130	ACP3	acid phosphatase 3 [Source:VGNC Symbol;Acc:VGNC:85025]
ENSSSCG00000011627	Upregulated	173079	13	-	73470811	73536040	TCONS_00059003	11	9398	XLOC_016130	ACP3	acid phosphatase 3 [Source:VGNC Symbol;Acc:VGNC:85025]
ENSSSCG00000011627	Upregulated	173080	13	+	73471775	73624534	TCONS_00050219	12	6107	XLOC_013809	ACP3	acid phosphatase 3 [Source:VGNC Symbol;Acc:VGNC:85025]
ENSSSCG00000011627	Upregulated	173081	13	+	73471881	73511147	TCONS_00050220	10	2315	XLOC_013809	ACP3	acid phosphatase 3 [Source:VGNC Symbol;Acc:VGNC:85025]
ENSSSCG00000011627	Upregulated	173082	13	+	73471881	73529174	TCONS_00050221	11	1462	XLOC_013809	ACP3	acid phosphatase 3 [Source:VGNC Symbol;Acc:VGNC:85025]
ENSSSCG00000011627	Upregulated	173083	13	+	73471881	73533969	TCONS_00050222	11	6257	XLOC_013809	ACP3	acid phosphatase 3 [Source:VGNC Symbol;Acc:VGNC:85025]
ENSSSCG00000011627	Upregulated	173084	13	+	73471881	73533969	TCONS_00050223	10	6158	XLOC_013809	ACP3	acid phosphatase 3 [Source:VGNC Symbol;Acc:VGNC:85025]
ENSSSCG00000011627	Upregulated	173085	13	+	73471881	73571052	TCONS_00050224	11	6009	XLOC_013809	ACP3	acid phosphatase 3 [Source:VGNC Symbol;Acc:VGNC:85025]
ENSSSCG00000011627	Upregulated	173086	13	+	73471889	73511147	TCONS_00050225	9	2208	XLOC_013809	ACP3	acid phosphatase 3 [Source:VGNC Symbol;Acc:VGNC:85025]
ENSSSCG00000011627	Upregulated	173087	13	-	73474874	73532845	TCONS_00059004	3	4131	XLOC_016130	ACP3	acid phosphatase 3 [Source:VGNC Symbol;Acc:VGNC:85025]
ENSSSCG00000011627	Upregulated	173088	13	+	73475543	73486749	TCONS_00050226	2	189	XLOC_013810	ACP3	acid phosphatase 3 [Source:VGNC Symbol;Acc:VGNC:85025]
ENSSSCG00000008835	Upregulated	122525	8	+	39612914	39708170	TCONS_00205567	2	639	XLOC_055584	RASL11B	RAS like family 11 member B [Source:VGNC Symbol;Acc:VGNC:92120]
ENSSSCG00000008835	Upregulated	122533	8	+	39702613	39708167	TCONS_00205574	5	1858	XLOC_055584	RASL11B	RAS like family 11 member B [Source:VGNC Symbol;Acc:VGNC:92120]
ENSSSCG00000008835	Upregulated	122534	8	+	39702613	39708170	TCONS_00205575	4	1784	XLOC_055584	RASL11B	RAS like family 11 member B [Source:VGNC Symbol;Acc:VGNC:92120]
ENSSSCG00000008835	Upregulated	122535	8	-	39703657	39708122	TCONS_00210275	3	1602	XLOC_056953	RASL11B	RAS like family 11 member B [Source:VGNC Symbol;Acc:VGNC:92120]
ENSSSCG00000008835	Upregulated	122536	8	-	39703657	39708128	TCONS_00210276	4	1677	XLOC_056953	RASL11B	RAS like family 11 member B [Source:VGNC Symbol;Acc:VGNC:92120]
ENSSSCG00000008835	Upregulated	122537	8	-	39703657	39708155	TCONS_00210277	4	1712	XLOC_056953	RASL11B	RAS like family 11 member B [Source:VGNC Symbol;Acc:VGNC:92120]
ENSSSCG00000008835	Upregulated	122538	8	-	39706123	39708122	TCONS_00210278	2	1493	XLOC_056953	RASL11B	RAS like family 11 member B [Source:VGNC Symbol;Acc:VGNC:92120]
ENSSSCG00000017262	Upregulated	156120	12	+	11774046	11932917	TCONS_00035737	3	5263	XLOC_010367	SLC16A6	solute carrier family 16 member 6 [Source:VGNC Symbol;Acc:VGNC:92946]
ENSSSCG00000017262	Upregulated	156122	12	+	11857954	11875315	TCONS_00035739	6	3815	XLOC_010369	SLC16A6	solute carrier family 16 member 6 [Source:VGNC Symbol;Acc:VGNC:92946]
ENSSSCG00000017262	Upregulated	156123	12	+	11857954	11879222	TCONS_00035740	7	5554	XLOC_010369	SLC16A6	solute carrier family 16 member 6 [Source:VGNC Symbol;Acc:VGNC:92946]
ENSSSCG00000017262	Upregulated	156124	12	+	11857954	11879222	TCONS_00035741	7	5554	XLOC_010369	SLC16A6	solute carrier family 16 member 6 [Source:VGNC Symbol;Acc:VGNC:92946]
ENSSSCG00000017262	Upregulated	156125	12	-	11858028	11875414	TCONS_00041832	6	3840	XLOC_011798	SLC16A6	solute carrier family 16 member 6 [Source:VGNC Symbol;Acc:VGNC:92946]
ENSSSCG00000017262	Upregulated	156126	12	-	11858028	11875414	TCONS_00041833	5	3711	XLOC_011798	SLC16A6	solute carrier family 16 member 6 [Source:VGNC Symbol;Acc:VGNC:92946]
ENSSSCG00000017262	Upregulated	156127	12	-	11858575	11875414	TCONS_00041834	6	3716	XLOC_011798	SLC16A6	solute carrier family 16 member 6 [Source:VGNC Symbol;Acc:VGNC:92946]
ENSSSCG00000017262	Upregulated	156128	12	+	11858590	11879222	TCONS_00035742	7	5341	XLOC_010369	SLC16A6	solute carrier family 16 member 6 [Source:VGNC Symbol;Acc:VGNC:92946]
ENSSSCG00000017262	Upregulated	156129	12	+	11859621	11879222	TCONS_00035743	7	5349	XLOC_010369	SLC16A6	solute carrier family 16 member 6 [Source:VGNC Symbol;Acc:VGNC:92946]
ENSSSCG00000017262	Upregulated	156130	12	+	11862792	11875315	TCONS_00035744	6	3642	XLOC_010369	SLC16A6	solute carrier family 16 member 6 [Source:VGNC Symbol;Acc:VGNC:92946]
ENSSSCG00000017262	Upregulated	156131	12	+	11862792	11879222	TCONS_00035745	7	5381	XLOC_010369	SLC16A6	solute carrier family 16 member 6 [Source:VGNC Symbol;Acc:VGNC:92946]
ENSSSCG00000017262	Upregulated	156132	12	+	11862792	11879222	TCONS_00035746	7	5381	XLOC_010369	SLC16A6	solute carrier family 16 member 6 [Source:VGNC Symbol;Acc:VGNC:92946]
ENSSSCG00000017262	Upregulated	156133	12	+	11862792	11879222	TCONS_00035747	7	5381	XLOC_010369	SLC16A6	solute carrier family 16 member 6 [Source:VGNC Symbol;Acc:VGNC:92946]
ENSSSCG00000049028	Upregulated	206482	15	+	128995487	129020669	TCONS_00083002	2	2460	XLOC_022450	ENSSSCG00000049028
ENSSSCG00000049028	Upregulated	206493	15	+	129019922	129020669	TCONS_00083009	1	748	XLOC_022450	ENSSSCG00000049028
ENSSSCG00000049028	Upregulated	206494	15	-	129020141	129020470	TCONS_00088287	2	312	XLOC_023899	ENSSSCG00000049028
ENSSSCG00000029874	Upregulated	160824	12	+	38928698	38983699	TCONS_00038153	6	2432	XLOC_010918	DUSP14	dual specificity phosphatase 14 [Source:VGNC Symbol;Acc:VGNC:87479]
ENSSSCG00000029874	Upregulated	160825	12	+	38928706	38983699	TCONS_00038154	4	2179	XLOC_010918	DUSP14	dual specificity phosphatase 14 [Source:VGNC Symbol;Acc:VGNC:87479]
ENSSSCG00000029874	Upregulated	160842	12	+	38941089	38978448	TCONS_00038164	3	5259	XLOC_010918	DUSP14	dual specificity phosphatase 14 [Source:VGNC Symbol;Acc:VGNC:87479]
ENSSSCG00000029874	Upregulated	160843	12	+	38941089	39061474	TCONS_00038165	25	8807	XLOC_010918	DUSP14	dual specificity phosphatase 14 [Source:VGNC Symbol;Acc:VGNC:87479]
ENSSSCG00000029874	Upregulated	160844	12	+	38941089	39190398	TCONS_00038166	4	1599	XLOC_010918	DUSP14	dual specificity phosphatase 14 [Source:VGNC Symbol;Acc:VGNC:87479]
ENSSSCG00000029874	Upregulated	160854	12	+	38942805	39069675	TCONS_00038167	25	9814	XLOC_010918	DUSP14	dual specificity phosphatase 14 [Source:VGNC Symbol;Acc:VGNC:87479]
ENSSSCG00000029874	Upregulated	160855	12	+	38942844	38989456	TCONS_00038168	6	1038	XLOC_010918	DUSP14	dual specificity phosphatase 14 [Source:VGNC Symbol;Acc:VGNC:87479]
ENSSSCG00000029874	Upregulated	160857	12	+	38951783	39079157	TCONS_00038169	4	1428	XLOC_010918	DUSP14	dual specificity phosphatase 14 [Source:VGNC Symbol;Acc:VGNC:87479]
ENSSSCG00000029874	Upregulated	160859	12	+	38954439	39079157	TCONS_00038170	5	1579	XLOC_010918	DUSP14	dual specificity phosphatase 14 [Source:VGNC Symbol;Acc:VGNC:87479]
ENSSSCG00000029874	Upregulated	160860	12	+	38954596	39069675	TCONS_00038171	24	10785	XLOC_010918	DUSP14	dual specificity phosphatase 14 [Source:VGNC Symbol;Acc:VGNC:87479]
ENSSSCG00000029874	Upregulated	160862	12	+	38961923	39059133	TCONS_00038172	4	1554	XLOC_010918	DUSP14	dual specificity phosphatase 14 [Source:VGNC Symbol;Acc:VGNC:87479]
ENSSSCG00000029874	Upregulated	160864	12	+	38968448	38975000	TCONS_00038173	2	6465	XLOC_010918	DUSP14	dual specificity phosphatase 14 [Source:VGNC Symbol;Acc:VGNC:87479]
ENSSSCG00000029874	Upregulated	160865	12	+	38968448	38978448	TCONS_00038174	2	9913	XLOC_010918	DUSP14	dual specificity phosphatase 14 [Source:VGNC Symbol;Acc:VGNC:87479]
ENSSSCG00000023181	Upregulated	203081	15	+	85035590	85138774	TCONS_00081346	11	1246	XLOC_022035	ZNF385B	zinc finger protein 385B [Source:VGNC Symbol;Acc:VGNC:98425]
ENSSSCG00000023181	Upregulated	203082	15	-	85035600	85383060	TCONS_00086540	14	1706	XLOC_023452	ZNF385B	zinc finger protein 385B [Source:VGNC Symbol;Acc:VGNC:98425]
ENSSSCG00000023181	Upregulated	203086	15	-	85045787	85347380	TCONS_00086542	8	3535	XLOC_023452	ZNF385B	zinc finger protein 385B [Source:VGNC Symbol;Acc:VGNC:98425]
ENSSSCG00000023181	Upregulated	203087	15	-	85045787	85367021	TCONS_00086543	9	2749	XLOC_023452	ZNF385B	zinc finger protein 385B [Source:VGNC Symbol;Acc:VGNC:98425]
ENSSSCG00000023181	Upregulated	203088	15	-	85045787	85367870	TCONS_00086544	10	2902	XLOC_023452	ZNF385B	zinc finger protein 385B [Source:VGNC Symbol;Acc:VGNC:98425]
ENSSSCG00000023181	Upregulated	203089	15	-	85045787	85367870	TCONS_00086545	10	2972	XLOC_023452	ZNF385B	zinc finger protein 385B [Source:VGNC Symbol;Acc:VGNC:98425]
ENSSSCG00000023181	Upregulated	203090	15	-	85045803	85346830	TCONS_00086546	9	3021	XLOC_023452	ZNF385B	zinc finger protein 385B [Source:VGNC Symbol;Acc:VGNC:98425]
ENSSSCG00000023181	Upregulated	203092	15	+	85045871	85150304	TCONS_00081350	9	2511	XLOC_022035	ZNF385B	zinc finger protein 385B [Source:VGNC Symbol;Acc:VGNC:98425]
ENSSSCG00000023181	Upregulated	203104	15	+	85047278	85136473	TCONS_00081362	9	1087	XLOC_022035	ZNF385B	zinc finger protein 385B [Source:VGNC Symbol;Acc:VGNC:98425]
ENSSSCG00000050531	Upregulated	102907	6	-	149792288	150088333	TCONS_00188738	45	10515	XLOC_050881	ENSSSCG00000050531
ENSSSCG00000050531	Upregulated	102936	6	-	150034783	150088319	TCONS_00188755	5	4467	XLOC_050881	ENSSSCG00000050531
ENSSSCG00000050531	Upregulated	102937	6	-	150073025	150088299	TCONS_00188756	4	4415	XLOC_050881	ENSSSCG00000050531
ENSSSCG00000050531	Upregulated	102938	6	-	150073025	150088321	TCONS_00188757	4	4443	XLOC_050881	ENSSSCG00000050531
ENSSSCG00000050531	Upregulated	102939	6	-	150073025	150090961	TCONS_00188758	3	4413	XLOC_050881	ENSSSCG00000050531
ENSSSCG00000050531	Upregulated	102940	6	-	150073025	150090981	TCONS_00188759	4	4402	XLOC_050881	ENSSSCG00000050531
ENSSSCG00000050531	Upregulated	102941	6	+	150073083	150091147	TCONS_00177835	3	4541	XLOC_048127	ENSSSCG00000050531
ENSSSCG00000050531	Upregulated	102942	6	+	150073088	150088341	TCONS_00177836	3	4226	XLOC_048127	ENSSSCG00000050531
ENSSSCG00000050531	Upregulated	102943	6	+	150073115	150088341	TCONS_00177837	3	4404	XLOC_048127	ENSSSCG00000050531
ENSSSCG00000050531	Upregulated	102944	6	-	150074456	150090961	TCONS_00188760	4	2951	XLOC_050881	ENSSSCG00000050531
ENSSSCG00000014983	Upregulated	132227	9	+	33250000	33308119	TCONS_00215157	10	1669	XLOC_058457	MMP20	matrix metallopeptidase 20 [Source:VGNC Symbol;Acc:VGNC:90275]
ENSSSCG00000014983	Upregulated	132228	9	+	33250187	33308119	TCONS_00215158	10	1607	XLOC_058457	MMP20	matrix metallopeptidase 20 [Source:VGNC Symbol;Acc:VGNC:90275]
ENSSSCG00000014983	Upregulated	132229	9	-	33261443	33308047	TCONS_00221323	10	3270	XLOC_060198	MMP20	matrix metallopeptidase 20 [Source:VGNC Symbol;Acc:VGNC:90275]
ENSSSCG00000014983	Upregulated	132230	9	-	33261443	33308047	TCONS_00221324	10	3397	XLOC_060198	MMP20	matrix metallopeptidase 20 [Source:VGNC Symbol;Acc:VGNC:90275]
ENSSSCG00000014983	Upregulated	132231	9	-	33261443	33308047	TCONS_00221325	10	3397	XLOC_060198	MMP20	matrix metallopeptidase 20 [Source:VGNC Symbol;Acc:VGNC:90275]
ENSSSCG00000014983	Upregulated	132232	9	-	33261443	33308047	TCONS_00221326	10	3307	XLOC_060198	MMP20	matrix metallopeptidase 20 [Source:VGNC Symbol;Acc:VGNC:90275]
ENSSSCG00000014983	Upregulated	132233	9	+	33261451	33281516	TCONS_00215159	5	2791	XLOC_058457	MMP20	matrix metallopeptidase 20 [Source:VGNC Symbol;Acc:VGNC:90275]
ENSSSCG00000014983	Upregulated	132234	9	+	33261498	33285764	TCONS_00215160	5	2572	XLOC_058457	MMP20	matrix metallopeptidase 20 [Source:VGNC Symbol;Acc:VGNC:90275]
ENSSSCG00000014983	Upregulated	132235	9	+	33261498	33288947	TCONS_00215161	5	2412	XLOC_058457	MMP20	matrix metallopeptidase 20 [Source:VGNC Symbol;Acc:VGNC:90275]
ENSSSCG00000014983	Upregulated	132236	9	+	33261498	33291736	TCONS_00215162	5	2417	XLOC_058457	MMP20	matrix metallopeptidase 20 [Source:VGNC Symbol;Acc:VGNC:90275]
[truncated: 21,896 more rows]
