# Supplementary material for: Altered hair root gene expression profiles highlight calcium signaling and lipid metabolism pathways to be associated with curly hair initiation and maintenance in Mangalitza pigs
Source: Front Genet. 2023 Jun 7;14:1184015. doi: 10.3389/fgene.2023.1184015 (PMC10282778; doi:10.3389/fgene.2023.1184015)
Supplement: Supplementary file 3 [file Table9.XLSX]

## Sheet: A
Table S9 DAVID functional analysis for SHvsP dataset (A) DAVID gene functional classification for the differentially expressed genes. The groups are represented by their enrichment scores, gene IDs and names. (B) Functional annotation of significantly enriched terms. The list of terms identified with DAVID functional annotation (enrichment p-value < 0.05) is grouped based on analysis type and dat…
Gene Group 1	Enrichment Score: 2.989235955365245
Ensembl ID	Gene Name
100153940	thrombospondin 2(THBS2)
100516420	adhesion G protein-coupled receptor E2-like(LOC100516420)
100157589	tolloid like 2(TLL2)
100621722	fibulin 2(FBLN2)
100518938	delta/notch like EGF repeat containing(DNER)
100522060	von Willebrand factor C and EGF domains(VWCE)
100516065	EGF like repeats and discoidin domains 3(EDIL3)
100525348	adhesion G protein-coupled receptor L4(ADGRL4)
Gene Group 2	Enrichment Score: 2.43228567721069
Ensembl ID	Gene Name
100514842	adhesion G protein-coupled receptor G3(ADGRG3)
100152930	adhesion G protein-coupled receptor F5(ADGRF5)
100240719	corticotropin releasing hormone receptor 2(CRHR2)
100736874	adhesion G protein-coupled receptor D1(ADGRD1)
100516420	adhesion G protein-coupled receptor E2-like(LOC100516420)
100525348	adhesion G protein-coupled receptor L4(ADGRL4)
Gene Group 3	Enrichment Score: 2.365810988756163
Ensembl ID	Gene Name
100622535	leucine rich repeat containing 9(LRRC9)
100520161	leucine rich repeat neuronal 3(LRRN3)
100511925	osteomodulin(OMD)
100622946	NPHS1 adhesion molecule, nephrin(NPHS1)
100738337	opioid binding protein/cell adhesion molecule like(OPCML)
100626921	neurofascin(NFASC)
100152082	immunoglobulin superfamily containing leucine rich repeat(ISLR)
100626754	immunoglobulin superfamily member 9B(IGSF9B)
100152102	DCC netrin 1 receptor(DCC)
100521388	cytotoxic and regulatory T cell molecule(CRTAM)
Gene Group 4	Enrichment Score: 2.1208561121491885
Ensembl ID	Gene Name
100519209	neurotrophic receptor tyrosine kinase 2(NTRK2)
396763	fms related receptor tyrosine kinase 1(FLT1)
100627123	platelet derived growth factor receptor alpha(PDGFRA)
100518179	fms related receptor tyrosine kinase 4(FLT4)
396729	TEK receptor tyrosine kinase(TEK)
397311	kinase insert domain receptor(KDR)
Gene Group 5	Enrichment Score: 1.7235244299248418
Ensembl ID	Gene Name
100626754	immunoglobulin superfamily member 9B(IGSF9B)
100620104	G protein-coupled receptor 50(GPR50)
100515982	NPC1 like intracellular cholesterol transporter 1(NPC1L1)
100624186	G protein-coupled receptor class C group 5 member A(GPRC5A)
654831	transmembrane protein with EGF like and two follistatin like domains 2(TMEFF2)
100524150	mannosidase alpha class 1C member 1(MAN1C1)
100513795	germ cell associated 1(GSG1)
100156403	leucine rich repeat containing 8 VRAC subunit C(LRRC8C)
100217391	FLVCR heme transporter 2(FLVCR2)
110261361	orphan sodium- and chloride-dependent neurotransmitter transporter NTT5-like(LOC110261361)
100620949	membrane spanning 4-domains A14(MS4A14)
100625506	solute carrier family 24 member 2(SLC24A2)
106504106	discoidin, CUB and LCCL domain containing 2(DCBLD2)
100157344	mucin 4, cell surface associated(MUC4)
100520624	solute carrier family 10 member 4(SLC10A4)
100626830	ATCAY kinesin light chain interacting caytaxin(ATCAY)
100620275	neurotensin receptor 2(NTSR2)
100154205	dual specificity phosphatase 13(DUSP13)
100517770	neuropeptide Y receptor Y5(NPY5R)
100151829	patched domain containing 1(PTCHD1)
110259258	olfactory receptor 1052-like(LOC110259258)
397075	uroplakin 2(UPK2)
100152394	reticulon 1(RTN1)
100623023	muscular LMNA interacting protein(MLIP)
100621597	XK related 4(XKR4)
397547	neuropeptide Y receptor Y1(NPY1R)
100736641	G protein-coupled receptor 12(GPR12)
100513676	ADAM metallopeptidase domain 22(ADAM22)
100625109	solute carrier family 10 member 2(SLC10A2)
100518044	ADAM metallopeptidase domain 23(ADAM23)
102163819	membrane spanning 4-domains A10(MS4A10)
100521553	tetraspanin 8(TSPAN8)
100525542	disintegrin and metalloproteinase domain-containing protein 32(LOC100525542)
100049687	ADAM3b(LOC100049687)
100626713	patched domain containing 4(PTCHD4)
100240723	sarcoglycan alpha(SGCA)
100738047	triggering receptor expressed on myeloid cells like 2(TREML2)
100628129	endomucin(EMCN)
100151799	acyl-CoA wax alcohol acyltransferase 2(AWAT2)
110259322	plasmalemma vesicle associated protein(PLVAP)
100514032	olfactory receptor 1052-like(LOC100514032)
106507011	serine rich and transmembrane domain containing 2(SERTM2)
100627175	GRAM domain containing 2-like(LOC100627175)
102160380	uncharacterized LOC102160380(LOC102160380)
110256562	sushi domain containing 5(SUSD5)
100154451	cysteine and tyrosine rich 1(CYYR1)
100153213	heparan sulfate 6-O-sulfotransferase 2(HS6ST2)
100519817	potassium sodium-activated channel subfamily T member 1(KCNT1)
397416	oligodendrocytic myelin paranodal and inner loop protein(OPALIN)
100624789	ring finger protein 150(RNF150)
100519624	transmembrane protein 212(TMEM212)
100521617	mal, T cell differentiation protein(MAL)
100525793	solute carrier family 22 member 16(SLC22A16)
100511162	sortilin related VPS10 domain containing receptor 3(SORCS3)
100512201	podocalyxin like(PODXL)
106504136	solute carrier family 17 member 4(SLC17A4)
100512581	lysophosphatidic acid receptor 1(LPAR1)
100152816	synaptotagmin 6(SYT6)
100622304	DC-STAMP domain containing 1(DCST1)
100157089	transmembrane protein 26(TMEM26)
100736874	adhesion G protein-coupled receptor D1(ADGRD1)
100628096	transmembrane protein 61(TMEM61)
100157365	C-type lectin domain containing 14A(CLEC14A)
100154799	serine rich and transmembrane domain containing 1(SERTM1)
100524634	neuropeptide FF receptor 2(NPFFR2)
100523302	fibrinogen C domain containing 1(FIBCD1)
100622765	receptor transporter protein 3(RTP3)
110261085	adherens junctions associated protein 1(AJAP1)
Gene Group 6	Enrichment Score: 1.6320178061524167
Ensembl ID	Gene Name
106510480	carbohydrate sulfotransferase 4(CHST4)
100525060	N-deacetylase and N-sulfotransferase 3(NDST3)
100737777	heparan sulfate-glucosamine 3-sulfotransferase 3B1(HS3ST3B1)
100155403	heparan sulfate-glucosamine 3-sulfotransferase 5(HS3ST5)
Gene Group 7	Enrichment Score: 1.62751435340145
Ensembl ID	Gene Name
100157966	hyaluronan binding protein 2(HABP2)
100513671	transmembrane protease serine 11B-like protein(LOC100513671)
100513484	transmembrane protease serine 11B(LOC100513484)
100513296	transmembrane protease serine 11F(LOC100513296)
Gene Group 8	Enrichment Score: 1.0276439485716653
Ensembl ID	Gene Name
100623937	potassium voltage-gated channel subfamily C member 4(KCNC4)
100519817	potassium sodium-activated channel subfamily T member 1(KCNT1)
102159212	potassium voltage-gated channel subfamily H member 1(KCNH1)
100519705	potassium calcium-activated channel subfamily N member 2(KCNN2)
Gene Group 9	Enrichment Score: 0.7641969530951154
Ensembl ID	Gene Name
100523255	KN motif and ankyrin repeat domains 4(KANK4)
100737336	neuroblastoma breakpoint family member 6-like(LOC100737336)
100155072	cilia and flagella associated protein 100(CFAP100)
100155563	RPGR interacting protein 1(RPGRIP1)
100623546	cilia and flagella associated protein 74(CFAP74)
100624964	Janus kinase and microtubule interacting protein 3(JAKMIP3)
Gene Group 10	Enrichment Score: 0.41783745721188936
Ensembl ID	Gene Name
100517504	ankyrin repeat and EF-hand domain containing 1(ANKEF1)
100514598	ankyrin repeat and SOCS box containing 16(ASB16)
100523255	KN motif and ankyrin repeat domains 4(KANK4)
100155360	ankyrin repeat domain 66(ANKRD66)
Gene Group 11	Enrichment Score: 0.2746924319233166
Ensembl ID	Gene Name
100155976	prospero homeobox 2(PROX2)
100516906	early growth response 4(EGR4)
100623053	zinc finger protein 467(ZNF467)
100157948	nuclear factor, erythroid 2(NFE2)

## Sheet: B
Analysis	Data base	Term	Overlap	P.value	Adjusted.P.value	Odds.Ratio	Combined.Score	Genes
SHvsP	GO_Molecular_Function_2021	receptor ligand activity (GO:0048018)	28/307	2.51576e-13	8.47812e-11	6.44387	186.943	IFNA5;IFNA4;IFNA7;IFNA6;IFNA1;IFNA2;NTS;IFNA8;FGF2;BMP15;THPO;NTF3;GAST;FGF21;IFNA21;IL10;IFNA14;IL15;IFNA16;IFNA17;SEMA6D;LIF;APLN;SFRP2;CLCF1;TAFA1;CCL26;IFNA10
SHvsP	GO_Molecular_Function_2021	cytokine activity (GO:0005125)	21/173	1.116e-12	1.88045e-10	8.72675	240.171	IFNA5;IL10;IFNA4;IFNA7;IFNA14;CXCL8;IFNA6;CCL22;IFNA1;IFNA16;IL15;IFNA17;IFNA2;LIF;FGF2;IFNA8;BMP15;CLCF1;IFNA10;IFNA21;CCL26
SHvsP	GO_Molecular_Function_2021	vascular endothelial growth factor-activated receptor activity (GO:0005021)	4/7	2.44951e-06	0.000275161	80.4376	1039.22	PDGFRA;FLT1;FLT4;KDR
SHvsP	GO_Molecular_Function_2021	neuropeptide receptor binding (GO:0071855)	5/18	8.51992e-06	0.000717803	23.2627	271.548	GAL;NMU;NTS;APLN;SHANK1
SHvsP	GO_Molecular_Function_2021	heparan sulfate sulfotransferase activity (GO:0034483)	4/15	8.604e-05	0.00579909	21.9286	205.267	HS3ST3B1;NDST3;HS3ST5;HS6ST2
SHvsP	GO_Molecular_Function_2021	RAGE receptor binding (GO:0050786)	3/9	0.000347323	0.017083	30.0673	239.494	S100A12;S100A9;S100A8
SHvsP	GO_Molecular_Function_2021	protein tyrosine kinase activity (GO:0004713)	8/108	0.00042502	0.017083	4.86211	37.7464	LYN;PDGFRA;NTRK2;FLT1;LCK;FLT4;KDR;TEK
SHvsP	GO_Molecular_Function_2021	transmembrane receptor protein kinase activity (GO:0019199)	6/60	0.000456224	0.017083	6.72702	51.7478	PDGFRA;NTRK2;FLT1;FLT4;KDR;TEK
SHvsP	GO_Molecular_Function_2021	transmembrane receptor protein tyrosine kinase activity (GO:0004714)	6/60	0.000456224	0.017083	6.72702	51.7478	PDGFRA;NTRK2;FLT1;FLT4;KDR;TEK
SHvsP	GO_Molecular_Function_2021	growth factor activity (GO:0008083)	7/87	0.000590147	0.019888	5.30689	39.4574	IL10;THPO;CLCF1;NTF3;LIF;FGF2;FGF21
SHvsP	GO_Molecular_Function_2021	ligand-gated channel activity (GO:0022834)	4/30	0.00142133	0.0399157	9.27041	60.7783	GABRB1;GRIN2A;GRIK3;GRIA3
SHvsP	GO_Molecular_Function_2021	neuropeptide receptor activity (GO:0008188)	4/30	0.00142133	0.0399157	9.27041	60.7783	GAL;NPY5R;NPY1R;SORCS3
SHvsP	GO_Molecular_Function_2021	ligand-gated ion channel activity (GO:0015276)	4/31	0.00161091	0.0417597	8.92661	57.4066	GABRB1;GRIN2A;GRIK3;GRIA3
SHvsP	GO_Molecular_Function_2021	cytokine receptor binding (GO:0005126)	7/105	0.00178771	0.0430327	4.32817	27.3836	IFNA5;IL10;IFNA14;CLCF1;LIF;IFNA8;IFNA21
SHvsP	GO_Molecular_Function_2021	ionotropic glutamate receptor activity (GO:0004970)	3/17	0.0025493	0.0520642	12.8807	76.9229	GRIN2A;GRIK3;GRIA3
SHvsP	GO_Molecular_Function_2021	ammonia-lyase activity (GO:0016841)	2/5	0.00262639	0.0520642	39.9736	237.529	SDS;SDSL
SHvsP	GO_Molecular_Function_2021	neuropeptide Y receptor activity (GO:0004983)	2/5	0.00262639	0.0520642	39.9736	237.529	NPY5R;NPY1R
SHvsP	GO_Molecular_Function_2021	icosatetraenoic acid binding (GO:0050543)	2/6	0.00389668	0.0637186	29.9787	166.31	S100A9;S100A8
SHvsP	GO_Molecular_Function_2021	arachidonic acid binding (GO:0050544)	2/6	0.00389668	0.0637186	29.9787	166.31	S100A9;S100A8
SHvsP	GO_Molecular_Function_2021	bile acid:sodium symporter activity (GO:0008508)	2/6	0.00389668	0.0637186	29.9787	166.31	SLC10A4;SLC10A2
SHvsP	GO_Molecular_Function_2021	potassium channel activity (GO:0005267)	6/91	0.00397059	0.0637186	4.26688	23.5909	KCNT1;KCNC4;GRIK3;KCNN2;KCNK2;KCNH1
SHvsP	GO_Molecular_Function_2021	[heparan sulfate]-glucosamine 3-sulfotransferase 1 activity (GO:0008467)	2/7	0.00539604	0.075829	23.9817	125.235	HS3ST3B1;HS3ST5
SHvsP	GO_Molecular_Function_2021	icosanoid binding (GO:0050542)	2/7	0.00539604	0.075829	23.9817	125.235	S100A9;S100A8
SHvsP	GO_Molecular_Function_2021	calcium ion binding (GO:0005509)	13/348	0.00540028	0.075829	2.36692	12.3584	CIB4;SYT6;CDH5;SCGN;PCLO;DNER;CDH22;MAN1C1;S100A12;PADI4;S100A9;DUOX2;S100A8
SHvsP	GO_Molecular_Function_2021	phosphatidylinositol phospholipase C activity (GO:0004435)	3/23	0.00617175	0.0831952	9.01376	45.86	CCR1;PLCZ1;CCR5
SHvsP	GO_Molecular_Function_2021	phospholipase C activity (GO:0004629)	3/25	0.0078231	0.101399	8.19349	39.744	CCR1;PLCZ1;CCR5
SHvsP	GO_Molecular_Function_2021	monocarboxylate:sodium symporter activity (GO:0140161)	2/10	0.0111908	0.13848	14.9863	67.3283	SLC10A4;SLC10A2
SHvsP	GO_Molecular_Function_2021	voltage-gated potassium channel activity (GO:0005249)	5/82	0.0115058	0.13848	3.91469	17.4787	KCNT1;KCNC4;KCNN2;KCNK2;KCNH1
SHvsP	GO_Molecular_Function_2021	Toll-like receptor binding (GO:0035325)	2/11	0.0135297	0.143626	13.3205	57.3161	S100A9;S100A8
SHvsP	GO_Molecular_Function_2021	UDP-galactosyltransferase activity (GO:0035250)	2/11	0.0135297	0.143626	13.3205	57.3161	B3GALT2;B4GALT6
SHvsP	GO_Molecular_Function_2021	outward rectifier potassium channel activity (GO:0015271)	2/11	0.0135297	0.143626	13.3205	57.3161	KCNT1;KCNK2
SHvsP	GO_Molecular_Function_2021	myosin binding (GO:0017022)	4/56	0.0136381	0.143626	4.62907	19.8814	NPHS1;NPC1L1;RAB39B;SHROOM4
SHvsP	GO_Molecular_Function_2021	kinase activator activity (GO:0019209)	3/31	0.0142191	0.145208	6.43578	27.3724	GPRC5A;RGCC;TREM2
SHvsP	GO_Molecular_Function_2021	chemokine binding (GO:0019956)	3/32	0.0155021	0.153653	6.21354	25.8905	CCR1;CCR5;FGF2
SHvsP	GO_Molecular_Function_2021	G protein-coupled receptor activity (GO:0004930)	10/283	0.0195798	0.188525	2.22035	8.73322	NPFFR2;ADGRG3;ADGRE2;ADGRD1;GPR12;LPAR1;GPR50;ADGRL4;CRHR2;NTSR2
SHvsP	GO_Molecular_Function_2021	myosin V binding (GO:0031489)	2/15	0.0247338	0.225278	9.21998	34.1101	NPC1L1;RAB39B
SHvsP	GO_Molecular_Function_2021	hexose transmembrane transporter activity (GO:0015149)	2/15	0.0247338	0.225278	9.21998	34.1101	SLC5A1;SLC2A5
SHvsP	GO_Molecular_Function_2021	phosphatidylinositol-3-phosphate binding (GO:0032266)	3/39	0.0262598	0.232883	5.00357	18.2116	JPH2;PLCZ1;RUFY4
SHvsP	GO_Molecular_Function_2021	phosphatidylinositol-5-phosphate binding (GO:0010314)	2/16	0.0279637	0.241635	8.56098	30.6213	JPH2;PLCZ1
SHvsP	GO_Molecular_Function_2021	low-density lipoprotein particle binding (GO:0030169)	2/17	0.0313522	0.2577	7.98984	27.6646	COLEC12;TREM2
SHvsP	GO_Molecular_Function_2021	G protein-coupled chemoattractant receptor activity (GO:0001637)	2/17	0.0313522	0.2577	7.98984	27.6646	CCR1;CCR5
SHvsP	GO_Molecular_Function_2021	RNA methyltransferase activity (GO:0008173)	2/19	0.0385816	0.307294	7.04914	22.9448	TRMT9B;HENMT1
SHvsP	GO_Molecular_Function_2021	hormone activity (GO:0005179)	4/78	0.0400866	0.307294	3.24921	10.4518	GAL;PENK;GAST;APLN
SHvsP	GO_Molecular_Function_2021	chemokine activity (GO:0008009)	3/46	0.0401215	0.307294	4.18754	13.4665	CXCL8;CCL22;CCL26
SHvsP	GO_Molecular_Function_2021	endopeptidase inhibitor activity (GO:0004866)	5/115	0.0419792	0.314377	2.73566	8.67365	SERPINB3;SERPINB4;AHSG;FETUB;SERPINA5
SHvsP	GO_Molecular_Function_2021	ligand-gated cation channel activity (GO:0099094)	4/80	0.0433439	0.317541	3.16338	9.92856	GRIN2A;GRIK3;KCNN2;GRIA3
SHvsP	GO_Molecular_Function_2021	glucose transmembrane transporter activity (GO:0005355)	2/21	0.046375	0.332518	6.30648	19.3672	SLC5A1;SLC2A5
SHvsP	GO_Molecular_Function_2021	metal ion binding (GO:0046872)	14/517	0.0488329	0.338968	1.68821	5.0973	EYA2;CIB4;SYT6;CDH5;SCGN;PCLO;DNER;CDH22;MAN1C1;S100A12;PADI4;S100A9;DUOX2;S100A8
SHvsP	GO_Molecular_Function_2021	chemokine receptor binding (GO:0042379)	3/50	0.0494006	0.338968	3.83037	11.521	CXCL8;CCL22;CCL26
SHvsP	GO_Biological_Process_2021	positive regulation of peptidyl-serine phosphorylation of STAT protein (GO:0033141)	13/18	4.21952e-20	7.82299e-17	161.29	7195.48	IFNA5;IFNA4;IFNA7;IFNA14;IFNA6;IFNA1;IFNA16;IFNA17;IFNA2;LIF;IFNA8;IFNA10;IFNA21
SHvsP	GO_Biological_Process_2021	regulation of peptidyl-serine phosphorylation of STAT protein (GO:0033139)	13/19	1.31657e-19	1.22046e-16	134.402	5842.99	IFNA5;IFNA4;IFNA7;IFNA14;IFNA6;IFNA1;IFNA16;IFNA17;IFNA2;LIF;IFNA8;IFNA10;IFNA21
SHvsP	GO_Biological_Process_2021	natural killer cell activation involved in immune response (GO:0002323)	12/21	8.5802e-17	5.30256e-14	82.4361	3049.68	IFNA5;IFNA4;IFNA7;IFNA14;IFNA6;IFNA1;IFNA16;IFNA17;IFNA2;IFNA8;IFNA10;IFNA21
SHvsP	GO_Biological_Process_2021	lymphocyte activation involved in immune response (GO:0002285)	12/24	7.55179e-16	3.50026e-13	61.8176	2152.46	IFNA5;IFNA4;IFNA7;IFNA14;IFNA6;IFNA1;IFNA16;IFNA17;IFNA2;IFNA8;IFNA10;IFNA21
SHvsP	GO_Biological_Process_2021	B cell proliferation (GO:0042100)	13/32	1.3905e-15	4.42173e-13	42.4146	1450.97	IFNA5;IL10;IFNA4;IFNA7;IFNA6;IFNA14;IFNA1;IFNA16;IFNA17;IFNA2;IFNA8;IFNA21;IFNA10
SHvsP	GO_Biological_Process_2021	response to dsRNA (GO:0043331)	12/25	1.43098e-15	4.42173e-13	57.0595	1950.32	IFNA5;IFNA4;IFNA7;IFNA6;IFNA14;IFNA1;IFNA16;IFNA17;IFNA2;IFNA8;IFNA21;IFNA10
SHvsP	GO_Biological_Process_2021	response to exogenous dsRNA (GO:0043330)	13/35	5.65277e-15	1.49718e-12	36.6252	1201.55	COLEC12;IFNA5;IFNA4;IFNA7;IFNA6;IFNA14;IFNA1;IFNA16;IFNA17;IFNA2;IFNA8;IFNA21;IFNA10
SHvsP	GO_Biological_Process_2021	T cell activation involved in immune response (GO:0002286)	12/28	8.00847e-15	1.85596e-12	46.3538	1504.56	IFNA5;IFNA4;IFNA7;IFNA6;IFNA14;IFNA1;IFNA16;IFNA17;IFNA2;IFNA8;IFNA21;IFNA10
SHvsP	GO_Biological_Process_2021	lymphocyte proliferation (GO:0046651)	13/38	1.98321e-14	4.08542e-12	32.2252	1016.75	IFNA5;IL10;IFNA4;IFNA7;IFNA6;IFNA14;IFNA1;IFNA16;IFNA17;IFNA2;IFNA8;IFNA21;IFNA10
SHvsP	GO_Biological_Process_2021	B cell differentiation (GO:0030183)	15/61	4.73378e-14	8.77643e-12	20.3147	623.285	IFNA5;IL10;IFNA4;IFNA7;IFNA6;IFNA14;IFNA1;IFNA16;IFNA17;IFNA2;IFNA8;ADGRG3;CLCF1;IFNA10;IFNA21
SHvsP	GO_Biological_Process_2021	lymphocyte differentiation (GO:0030098)	16/84	4.86565e-13	8.20084e-11	14.6886	416.444	IFNA5;IL10;IFNA4;IFNA7;IFNA6;IFNA14;IFNA1;IFNA16;IFNA17;IFNA2;IFNA8;ADGRG3;LCK;CLCF1;IFNA10;IFNA21
SHvsP	GO_Biological_Process_2021	T cell activation (GO:0042110)	16/92	2.13225e-12	3.29433e-10	13.1371	353.045	IFNA5;IFNA4;IFNA7;IFNA6;IFNA14;IFNA1;IFNA16;IFNA17;IFNA2;CRTAM;IFNA8;LCK;TREML2;ADA;IFNA10;IFNA21
SHvsP	GO_Biological_Process_2021	natural killer cell activation (GO:0030101)	12/43	3.23554e-12	4.61438e-10	23.9063	632.484	IFNA5;IFNA4;IFNA7;IFNA6;IFNA14;IFNA1;IFNA16;IFNA17;IFNA2;IFNA8;IFNA21;IFNA10
SHvsP	GO_Biological_Process_2021	B cell activation (GO:0042113)	15/85	8.44688e-12	1.11861e-09	13.3333	339.963	IFNA5;IL10;IFNA4;IFNA7;IFNA6;IFNA14;IFNA1;IFNA16;IFNA17;IFNA2;IFNA8;ADGRG3;CLCF1;IFNA10;IFNA21
SHvsP	GO_Biological_Process_2021	positive regulation of peptidyl-serine phosphorylation (GO:0033138)	15/93	3.25752e-11	4.0263e-09	11.9609	288.826	IFNA5;IFNA4;IFNA7;IFNA6;IFNA14;IFNA1;IFNA16;IFNA17;IFNA2;LIF;IFNA8;SFRP2;NTF3;IFNA10;IFNA21
SHvsP	GO_Biological_Process_2021	cellular response to type I interferon (GO:0071357)	13/65	4.03186e-11	4.3971e-09	15.4716	370.301	IFNA5;IFNA4;IFNA7;IFNA6;IFNA14;IFNA1;RSAD2;IFNA16;IFNA17;IFNA2;IFNA8;IFNA10;IFNA21
SHvsP	GO_Biological_Process_2021	type I interferon signaling pathway (GO:0060337)	13/65	4.03186e-11	4.3971e-09	15.4716	370.301	IFNA5;IFNA4;IFNA7;IFNA6;IFNA14;IFNA1;RSAD2;IFNA16;IFNA17;IFNA2;IFNA8;IFNA10;IFNA21
SHvsP	GO_Biological_Process_2021	cytokine-mediated signaling pathway (GO:0019221)	28/621	1.66902e-06	0.000170112	2.98268	39.6794	IFNA5;IFNA4;PSMB11;IFNA7;PLVAP;IFNA6;CXCL8;IFNA1;IFNA2;PELI2;IFNA8;FGF2;CCR5;DUOX2;IFNA21;CCR1;IL10;CCL22;IFNA14;RSAD2;IL15;IFNA16;IFNA17;LIF;LCK;CLCF1;CCL26;IFNA10
SHvsP	GO_Biological_Process_2021	cellular response to cytokine stimulus (GO:0071345)	24/482	1.74332e-06	0.000170112	3.29001	43.6246	CCR1;IFNA5;IL10;IFNA4;IFNA7;IFNA6;CCL22;IFNA14;CXCL8;IFNA1;IFNA16;IFNA17;IFNA2;LIF;IFNA8;FGF2;RUFY4;LCK;CLCF1;CCR5;DUOX2;CCL26;IFNA10;IFNA21
SHvsP	GO_Biological_Process_2021	positive regulation of MAPK cascade (GO:0043410)	17/274	3.36268e-06	0.000311721	4.10265	51.7047	CCR1;PDGFRA;NTRK2;CCL22;FLT1;FLT4;PELI2;LPAR1;LIF;TREM2;FGF2;THPO;KDR;S100A12;TEK;CCL26;FGF21
SHvsP	GO_Biological_Process_2021	positive regulation of phosphatidylinositol 3-kinase signaling (GO:0014068)	9/77	4.89465e-06	0.000432128	8.08219	98.8239	LYN;PDGFRA;NTRK2;FLT1;NTF3;KDR;TREM2;TEK;FGF2
SHvsP	GO_Biological_Process_2021	vasculature development (GO:0001944)	5/17	6.23738e-06	0.000525641	25.2026	302.051	PDGFRA;CDH5;FOXF1;FLT4;STRA6
SHvsP	GO_Biological_Process_2021	peptidyl-tyrosine phosphorylation (GO:0018108)	8/69	1.759e-05	0.00141791	7.98656	87.4383	LYN;PDGFRA;FLT1;IL15;LCK;FLT4;KDR;TEK
SHvsP	GO_Biological_Process_2021	regulation of MAPK cascade (GO:0043408)	12/166	2.09892e-05	0.00158379	4.78216	51.5111	LYN;NTRK2;FLT1;THPO;FLT4;PELI2;KDR;LPAR1;LIF;TEK;FGF2;PPEF2
SHvsP	GO_Biological_Process_2021	enzyme linked receptor protein signaling pathway (GO:0007167)	11/140	2.13564e-05	0.00158379	5.22347	56.174	LYN;PDGFRA;PTPRU;NTRK2;FLT1;LCK;FLT4;NTF3;KDR;LIF;TEK
SHvsP	GO_Biological_Process_2021	granulocyte chemotaxis (GO:0071621)	8/73	2.67081e-05	0.00190449	7.49355	78.9112	ADGRE2;CXCL8;CCL22;PDE4B;S100A12;S100A9;S100A8;CCL26
SHvsP	GO_Biological_Process_2021	positive regulation of ERK1 and ERK2 cascade (GO:0070374)	12/172	2.98646e-05	0.0020507	4.60142	47.9414	CCR1;PDGFRA;NTRK2;CCL22;THPO;FLT4;KDR;TREM2;TEK;FGF2;FGF21;CCL26
SHvsP	GO_Biological_Process_2021	peptidyl-tyrosine modification (GO:0018212)	7/56	3.62057e-05	0.00239733	8.67802	88.744	LYN;PDGFRA;FLT1;LCK;FLT4;KDR;TEK
SHvsP	GO_Biological_Process_2021	regulation of ERK1 and ERK2 cascade (GO:0070372)	14/238	4.42933e-05	0.00283172	3.84612	38.5561	CCR1;LYN;PDGFRA;NTRK2;CCL22;RGS14;FLT4;TREM2;FGF2;THPO;KDR;TEK;CCL26;FGF21
SHvsP	GO_Biological_Process_2021	regulation of cell migration (GO:0030334)	19/408	5.26964e-05	0.00325664	3.02812	29.8299	CCR1;SERPINB3;PTPRU;PDGFRA;FLT1;MMP7;SEMA6D;CHRD;FGF2;ADGRG3;CDH5;TMEFF2;SFRP2;NAV3;PODXL;NTF3;KDR;CCL26;FGF21
SHvsP	GO_Biological_Process_2021	regulation of phosphatidylinositol 3-kinase signaling (GO:0014066)	9/106	6.55961e-05	0.00392307	5.65748	54.4928	LYN;PDGFRA;NTRK2;FLT1;NTF3;KDR;TREM2;TEK;FGF2
SHvsP	GO_Biological_Process_2021	positive regulation of phospholipase C activity (GO:0010863)	6/43	7.02641e-05	0.00407093	9.82633	93.9716	NTRK2;PDGFRA;FLT1;NTF3;LPAR1;FGF2
SHvsP	GO_Biological_Process_2021	positive regulation of phosphorylation (GO:0042327)	14/253	8.5538e-05	0.00455766	3.60195	33.7379	LYN;PDGFRA;NTRK2;FLT1;FLT4;IFNA2;PELI2;PLAUR;TREM2;FGF2;THPO;KDR;TEK;FGF21
SHvsP	GO_Biological_Process_2021	heparan sulfate proteoglycan biosynthetic process, enzymatic modification (GO:0015015)	3/6	8.58036e-05	0.00455766	60.1437	563.153	HS3ST3B1;HS3ST5;HS6ST2
SHvsP	GO_Biological_Process_2021	regulation of phospholipase C activity (GO:1900274)	4/15	8.604e-05	0.00455766	21.9286	205.267	PDGFRA;FLT1;NTF3;FGF2
SHvsP	GO_Biological_Process_2021	regulation of protein phosphorylation (GO:0001932)	14/266	0.000145072	0.00747122	3.41385	30.1726	LYN;NTRK2;FLT4;PELI2;PLAUR;TREM2;FGF2;CDH5;THPO;KDR;TEK;ATF3;SH3GL2;FGF21
SHvsP	GO_Biological_Process_2021	neutrophil chemotaxis (GO:0030593)	7/70	0.000153672	0.00770021	6.74475	59.2236	CXCL8;CCL22;PDE4B;S100A12;S100A9;S100A8;CCL26
SHvsP	GO_Biological_Process_2021	regulation of cell adhesion mediated by integrin (GO:0033628)	5/34	0.000222822	0.0108713	10.4196	87.6201	LYN;SFRP2;NEXMIF;LIF;ADA
SHvsP	GO_Biological_Process_2021	heparan sulfate proteoglycan biosynthetic process (GO:0015012)	4/19	0.000231898	0.0110241	16.0777	134.558	HS3ST3B1;NDST3;HS3ST5;HS6ST2
SHvsP	GO_Biological_Process_2021	positive regulation of protein modification process (GO:0031401)	12/214	0.000240449	0.0111448	3.63684	30.3058	LYN;CDH5;NTRK2;THPO;FLT4;PELI2;KDR;PLAUR;TREM2;TEK;FGF2;FGF21
SHvsP	GO_Biological_Process_2021	neutrophil migration (GO:1990266)	7/77	0.000279412	0.0126302	6.06811	49.6543	CXCL8;CCL22;PDE4B;S100A12;S100A9;S100A8;CCL26
SHvsP	GO_Biological_Process_2021	embryonic digestive tract development (GO:0048566)	4/20	0.000286122	0.0126302	15.0721	122.975	PDGFRA;CXCL8;FOXF1;STRA6
SHvsP	GO_Biological_Process_2021	positive regulation of cellular process (GO:0048522)	23/625	0.000306765	0.0132266	2.373	19.1962	LYN;SERPINB3;COLEC12;PDGFRA;NTRK2;FLT1;EGR4;AHSG;IL15;FLT4;LIF;CHRD;TREM2;FGF2;DYNAP;SFRP2;THPO;CLCF1;NTF3;KDR;S100A9;S100A8;FGF21
SHvsP	GO_Biological_Process_2021	positive regulation of cell motility (GO:2000147)	12/221	0.000322689	0.0135969	3.51377	28.2465	CCR1;SERPINB3;CDH5;PDGFRA;FLT1;MMP7;PODXL;SEMA6D;NTF3;KDR;DUOX2;CCL26
SHvsP	GO_Biological_Process_2021	heparan sulfate proteoglycan metabolic process (GO:0030201)	4/21	0.000348874	0.0140611	14.1848	112.922	HS3ST3B1;NDST3;HS3ST5;HS6ST2
SHvsP	GO_Biological_Process_2021	long-term synaptic potentiation (GO:0060291)	4/21	0.000348874	0.0140611	14.1848	112.922	SLC24A2;GRIN2A;RGS14;CRHR2
SHvsP	GO_Biological_Process_2021	positive regulation of protein phosphorylation (GO:0001934)	16/371	0.000477457	0.0188341	2.77241	21.2007	LYN;NTRK2;IL15;FLT4;PELI2;LIF;PLAUR;TREM2;FGF2;BMP15;SFRP2;THPO;NTF3;KDR;TEK;FGF21
SHvsP	GO_Biological_Process_2021	positive regulation of phospholipase activity (GO:0010518)	4/24	0.000595708	0.0230092	12.0552	89.5191	PDGFRA;FLT1;NTF3;FGF2
SHvsP	GO_Biological_Process_2021	regulation of endothelial cell apoptotic process (GO:2000351)	5/44	0.00076008	0.0287589	7.74398	55.618	IL10;CDH5;RGCC;KDR;TEK
SHvsP	GO_Biological_Process_2021	positive regulation of transferase activity (GO:0051347)	9/148	0.000801322	0.029713	3.93955	28.0861	PDGFRA;NTRK2;FLT1;FLT4;KDR;MAGEA2;TREM2;MAGEC2;TEK
SHvsP	GO_Biological_Process_2021	protein localization to synapse (GO:0035418)	3/12	0.000876781	0.0318736	20.0418	141.079	PCLO;NPHS1;SHANK1
SHvsP	GO_Biological_Process_2021	regulation of kinase activity (GO:0043549)	7/94	0.000937353	0.0323336	4.87815	34.0127	PDGFRA;NTRK2;FLT1;FLT4;KDR;TREM2;TEK
SHvsP	GO_Biological_Process_2021	hemopoiesis (GO:0030097)	7/94	0.000937353	0.0323336	4.87815	34.0127	IL10;FLT1;SFRP2;LCK;FLT4;KDR;TEK
SHvsP	GO_Biological_Process_2021	negative regulation of endothelial cell apoptotic process (GO:2000352)	4/27	0.000946297	0.0323336	10.4812	72.9801	IL10;CDH5;KDR;TEK
SHvsP	GO_Biological_Process_2021	positive regulation of cell population proliferation (GO:0008284)	18/474	0.000959195	0.0323336	2.43092	16.8935	LYN;SERPINB3;PDGFRA;NTRK2;FLT1;EGR4;IL15;FLT4;LIF;CHRD;FGF2;DYNAP;SFRP2;THPO;CLCF1;NTF3;KDR;FGF21
SHvsP	GO_Biological_Process_2021	positive regulation of cell-cell adhesion (GO:0022409)	5/47	0.00103118	0.0341394	7.18974	49.4442	IL10;PTPRU;PODXL;LCK;PLAUR
SHvsP	GO_Biological_Process_2021	positive regulation of phosphatidylinositol 3-kinase activity (GO:0043552)	4/28	0.00108979	0.0354468	10.044	68.5176	PDGFRA;FLT1;TEK;FGF2
SHvsP	GO_Biological_Process_2021	positive regulation of synaptic transmission (GO:0050806)	6/73	0.0012973	0.0414687	5.41819	36.0173	SLC24A2;GRIN2A;RIMS3;RGS14;NMU;CRHR2
SHvsP	GO_Biological_Process_2021	cardiac left ventricle morphogenesis (GO:0003214)	3/14	0.00141558	0.0431991	16.3962	107.562	SFRP2;NPY5R;FOXF1
SHvsP	GO_Biological_Process_2021	intestinal absorption (GO:0050892)	3/14	0.00141558	0.0431991	16.3962	107.562	NPC1L1;SLC5A1;SLC2A5
SHvsP	GO_Biological_Process_2021	positive regulation of lipid kinase activity (GO:0090218)	4/30	0.00142133	0.0431991	9.27041	60.7783	PDGFRA;FLT1;TEK;FGF2
SHvsP	GO_Biological_Process_2021	positive regulation of vasculature development (GO:1904018)	7/102	0.00151241	0.045226	4.46554	28.9994	CDH5;SFRP2;CXCL8;FLT1;KDR;TEK;FGF2
SHvsP	GO_Biological_Process_2021	positive regulation of endothelial cell proliferation (GO:0001938)	6/77	0.00171038	0.0503341	5.11189	32.5681	FLT4;KDR;TEK;FGF2;APLN;CCL26
SHvsP	GO_Biological_Process_2021	positive regulation of intracellular signal transduction (GO:1902533)	19/546	0.00192117	0.0556539	2.21918	13.8806	LYN;PDGFRA;NTRK2;FLT1;FLT4;PELI2;LPAR1;LIF;TREM2;DDX60;FGF2;THPO;LCK;NTF3;KDR;S100A12;TEK;S100A9;S100A8
SHvsP	GO_Biological_Process_2021	regulation of cell population proliferation (GO:0042127)	24/764	0.00204259	0.0581819	2.00636	12.4265	LYN;SERPINB3;IL10;PTPRU;PDGFRA;NTRK2;MYOCD;FLT1;CXCL8;EGR4;IL15;ELN;FLT4;LIF;FGF2;DYNAP;SFRP2;RGCC;THPO;CLCF1;NTF3;KDR;KCNH1;FGF21
SHvsP	GO_Biological_Process_2021	regulation of angiogenesis (GO:0045765)	10/203	0.0020712	0.0581819	3.15366	19.4884	CDH5;SFRP2;RGCC;CXCL8;FLT1;KDR;TEK;THBS2;FGF2;HOXA5
SHvsP	GO_Biological_Process_2021	digestive tract morphogenesis (GO:0048546)	3/16	0.00212522	0.0588082	13.8723	85.3683	PDGFRA;FOXF1;STRA6
SHvsP	GO_Biological_Process_2021	blood vessel morphogenesis (GO:0048514)	5/56	0.00227612	0.0611584	5.91825	36.0142	FLT1;FLT4;GJA5;KDR;STRA6
SHvsP	GO_Biological_Process_2021	chemokine-mediated signaling pathway (GO:0070098)	5/56	0.00227612	0.0611584	5.91825	36.0142	CCR1;CXCL8;CCL22;THPO;CCL26
SHvsP	GO_Biological_Process_2021	regulation of phosphatidylinositol 3-kinase activity (GO:0043551)	4/35	0.00254557	0.0640068	7.7732	46.4325	PDGFRA;FLT1;TEK;FGF2
SHvsP	GO_Biological_Process_2021	positive regulation of positive chemotaxis (GO:0050927)	3/17	0.0025493	0.0640068	12.8807	76.9229	CXCL8;NTF3;KDR
SHvsP	GO_Biological_Process_2021	cellular response to brain-derived neurotrophic factor stimulus (GO:1990416)	2/5	0.00262639	0.0640068	39.9736	237.529	NTRK2;SH3GL2
SHvsP	GO_Biological_Process_2021	regulation of integrin biosynthetic process (GO:0045113)	2/5	0.00262639	0.0640068	39.9736	237.529	TMEFF2;S100A9
SHvsP	GO_Biological_Process_2021	Toll signaling pathway (GO:0008063)	2/5	0.00262639	0.0640068	39.9736	237.529	PALM3;PELI2
SHvsP	GO_Biological_Process_2021	vascular endothelial growth factor receptor-2 signaling pathway (GO:0036324)	2/5	0.00262639	0.0640068	39.9736	237.529	KDR;CLEC14A
SHvsP	GO_Biological_Process_2021	peptidyl-cysteine S-nitrosylation (GO:0018119)	2/5	0.00262639	0.0640068	39.9736	237.529	S100A9;S100A8
SHvsP	GO_Biological_Process_2021	regulation of neurotransmitter receptor activity (GO:0099601)	5/58	0.00265832	0.0640068	5.69434	33.7678	GRIN2A;NEFL;NPTX2;GRIA3;SHANK1
SHvsP	GO_Biological_Process_2021	positive regulation of kinase activity (GO:0033674)	7/114	0.00285129	0.0672583	3.9623	23.219	PDGFRA;NTRK2;FLT1;FLT4;KDR;TREM2;TEK
SHvsP	GO_Biological_Process_2021	positive regulation of tyrosine phosphorylation of STAT protein (GO:0042531)	5/59	0.00286592	0.0672583	5.5886	32.7205	LYN;IL15;CLCF1;IFNA2;LIF
SHvsP	GO_Biological_Process_2021	regulation of vascular endothelial cell proliferation (GO:1905562)	3/18	0.00302207	0.0691718	12.0214	69.746	FLT1;FGF2;APLN
SHvsP	GO_Biological_Process_2021	positive regulation of cell adhesion mediated by integrin (GO:0033630)	3/18	0.00302207	0.0691718	12.0214	69.746	SFRP2;PODXL;LIF
SHvsP	GO_Biological_Process_2021	transmembrane receptor protein tyrosine kinase signaling pathway (GO:0007169)	15/404	0.00307822	0.0693593	2.36026	13.6504	LYN;PDGFRA;NTRK2;FLT1;ANGPT2;RGS14;FLT4;KALRN;FGF2;LCK;NTF3;KDR;TEK;ATP6V1C2;FGF21
SHvsP	GO_Biological_Process_2021	negative regulation of epithelial cell apoptotic process (GO:1904036)	4/37	0.00312908	0.0693593	7.30136	42.107	IL10;CDH5;KDR;TEK
SHvsP	GO_Biological_Process_2021	positive regulation of angiogenesis (GO:0045766)	7/116	0.00314249	0.0693593	3.8892	22.4124	CDH5;SFRP2;CXCL8;FLT1;KDR;TEK;FGF2
SHvsP	GO_Biological_Process_2021	aspartate family amino acid catabolic process (GO:0009068)	3/19	0.00354523	0.0764285	11.2695	63.5842	SDS;SDSL;AASS
SHvsP	GO_Biological_Process_2021	regulation of cell-cell adhesion mediated by cadherin (GO:2000047)	3/19	0.00354523	0.0764285	11.2695	63.5842	PTPRU;RGCC;NEXMIF
SHvsP	GO_Biological_Process_2021	negative regulation of endopeptidase activity (GO:0010951)	5/63	0.00381451	0.0768559	5.20212	28.9703	SERPINB3;SERPINB4;AHSG;FETUB;SERPINA5
SHvsP	GO_Biological_Process_2021	negative regulation of peptidase activity (GO:0010466)	5/63	0.00381451	0.0768559	5.20212	28.9703	SERPINB3;SERPINB4;AHSG;FETUB;SERPINA5
SHvsP	GO_Biological_Process_2021	neuropeptide signaling pathway (GO:0007218)	5/63	0.00381451	0.0768559	5.20212	28.9703	GAL;PENK;NMU;SORCS3;NTS
SHvsP	GO_Biological_Process_2021	protein sulfation (GO:0006477)	2/6	0.00389668	0.0768559	29.9787	166.31	HS3ST5;CHST4
SHvsP	GO_Biological_Process_2021	glomerulus vasculature development (GO:0072012)	2/6	0.00389668	0.0768559	29.9787	166.31	ANGPT2;TEK
SHvsP	GO_Biological_Process_2021	hexose import across plasma membrane (GO:0140271)	2/6	0.00389668	0.0768559	29.9787	166.31	SLC5A1;SLC2A5
SHvsP	GO_Biological_Process_2021	isoleucine metabolic process (GO:0006549)	2/6	0.00389668	0.0768559	29.9787	166.31	SDS;SDSL
SHvsP	GO_Biological_Process_2021	negative regulation of toll-like receptor 2 signaling pathway (GO:0034136)	2/6	0.00389668	0.0768559	29.9787	166.31	LYN;TREM2
SHvsP	GO_Biological_Process_2021	organic hydroxy compound transport (GO:0015850)	4/40	0.00416568	0.0800862	6.69189	36.6774	SLC10A4;SLC10A2;ABCB11;STRA6
SHvsP	GO_Biological_Process_2021	regulation of endothelial cell proliferation (GO:0001936)	6/92	0.00419006	0.0800862	4.21705	23.0885	RGCC;FLT4;KDR;TEK;FGF2;CCL26
SHvsP	GO_Biological_Process_2021	regulation of peptidyl-tyrosine phosphorylation (GO:0050730)	6/92	0.00419006	0.0800862	4.21705	23.0885	SFRP2;IL15;NTF3;LIF;TREM2;SAMSN1
SHvsP	GO_Biological_Process_2021	negative regulation of cell-cell adhesion (GO:0022408)	4/41	0.00455699	0.0862107	6.51069	35.0998	IL10;RGCC;PODXL;NEXMIF
SHvsP	GO_Biological_Process_2021	calcium ion transmembrane import into cytosol (GO:0097553)	4/42	0.00497229	0.0921863	6.33904	33.6215	SLC24A2;GRIN2A;LCK;FGF2
SHvsP	GO_Biological_Process_2021	monocyte chemotaxis (GO:0002548)	4/42	0.00497229	0.0921863	6.33904	33.6215	FLT1;CCL22;S100A12;CCL26
SHvsP	GO_Biological_Process_2021	negative regulation of macromolecule metabolic process (GO:0010605)	9/194	0.00504917	0.0923995	2.95302	15.6171	CCR1;SFRP2;CXCL8;STC2;IFNA2;KDR;FGF2;SH3GL2;APLN
SHvsP	GO_Biological_Process_2021	positive regulation of cell migration (GO:0030335)	11/269	0.00527721	0.0923995	2.59449	13.6065	CCR1;SERPINB3;CDH5;PDGFRA;FLT1;MMP7;PODXL;SEMA6D;NTF3;KDR;CCL26
SHvsP	GO_Biological_Process_2021	regulation of tyrosine phosphorylation of STAT protein (GO:0042509)	5/68	0.00529263	0.0923995	4.78803	25.0962	LYN;IL15;CLCF1;IFNA2;LIF
SHvsP	GO_Biological_Process_2021	glomerular epithelial cell development (GO:0072310)	2/7	0.00539604	0.0923995	23.9817	125.235	NPHS1;PODXL
SHvsP	GO_Biological_Process_2021	glomerular visceral epithelial cell development (GO:0072015)	2/7	0.00539604	0.0923995	23.9817	125.235	NPHS1;PODXL
SHvsP	GO_Biological_Process_2021	regulation of MAP kinase activity (GO:0043405)	6/97	0.00542408	0.0923995	3.98433	20.7859	LYN;FLT1;RGS14;S100A12;FGF2;PPEF2
SHvsP	GO_Biological_Process_2021	cellular response to nerve growth factor stimulus (GO:1990090)	3/22	0.00543233	0.0923995	9.48865	49.487	NTRK2;NTF3;SH3GL2
SHvsP	GO_Biological_Process_2021	negative regulation of B cell activation (GO:0050869)	3/22	0.00543233	0.0923995	9.48865	49.487	IL10;LYN;SAMSN1
SHvsP	GO_Biological_Process_2021	protein localization to cell junction (GO:1902414)	3/22	0.00543233	0.0923995	9.48865	49.487	PCLO;NPHS1;SHANK1
SHvsP	GO_Biological_Process_2021	embryonic organ morphogenesis (GO:0048562)	4/44	0.00587745	0.0990618	6.02147	30.9301	PDGFRA;HOXA9;FOXE1;FOXF1
SHvsP	GO_Biological_Process_2021	blood vessel endothelial cell migration (GO:0043534)	3/23	0.00617175	0.101681	9.01376	45.86	CDH5;KDR;FGF2
SHvsP	GO_Biological_Process_2021	negative regulation of G protein-coupled receptor signaling pathway (GO:0045744)	3/23	0.00617175	0.101681	9.01376	45.86	CXCL8;RGS14;ADA
SHvsP	GO_Biological_Process_2021	adenylate cyclase-modulating G protein-coupled receptor signaling pathway (GO:0007188)	8/165	0.00619739	0.101681	3.08787	15.6976	ADGRG3;ADGRE2;ADGRD1;GPR12;NPY1R;LPAR1;ADGRL4;CRHR2
SHvsP	GO_Biological_Process_2021	regulation of endopeptidase activity (GO:0052548)	5/71	0.00635208	0.102672	4.5697	23.118	SERPINB3;SERPINB4;AHSG;FETUB;SERPINA5
SHvsP	GO_Biological_Process_2021	positive regulation of chemotaxis (GO:0050921)	4/45	0.00636856	0.102672	5.87431	29.7027	KDR;TREM2;FGF2;CCL26
SHvsP	GO_Biological_Process_2021	negative regulation of supramolecular fiber organization (GO:1902904)	5/72	0.00673603	0.107561	4.50126	22.5076	CDH5;NAV3;TREM2;KANK4;SHANK1
SHvsP	GO_Biological_Process_2021	positive regulation of peptidyl-tyrosine phosphorylation (GO:0050731)	7/134	0.00689266	0.107561	3.3349	16.5988	LYN;IL15;CLCF1;IFNA2;NTF3;LIF;TREM2
SHvsP	GO_Biological_Process_2021	defense response to fungus (GO:0050832)	3/24	0.00696833	0.107561	8.5841	42.6319	S100A12;S100A9;S100A8
SHvsP	GO_Biological_Process_2021	regulation of microvillus organization (GO:0032530)	2/8	0.00711659	0.107561	19.9837	98.8261	PODXL;USH1C
SHvsP	GO_Biological_Process_2021	regulation of positive chemotaxis (GO:0050926)	2/8	0.00711659	0.107561	19.9837	98.8261	ANGPT2;KDR
SHvsP	GO_Biological_Process_2021	leukocyte aggregation (GO:0070486)	2/8	0.00711659	0.107561	19.9837	98.8261	S100A9;S100A8
SHvsP	GO_Biological_Process_2021	positive regulation of muscle contraction (GO:0045933)	2/8	0.00711659	0.107561	19.9837	98.8261	MYOCD;NMU
SHvsP	GO_Biological_Process_2021	response to molecule of bacterial origin (GO:0002237)	5/73	0.00713594	0.107561	4.43484	21.9197	IL10;CXCL8;PALM3;S100A9;S100A8
SHvsP	GO_Biological_Process_2021	regulation of inflammatory response (GO:0050727)	9/206	0.0073936	0.110546	2.77143	13.5998	IL10;CDH5;AHSG;IL15;S100A12;TEK;S100A9;USP18;S100A8
SHvsP	GO_Biological_Process_2021	negative regulation of gene expression (GO:0010629)	12/322	0.00750797	0.110884	2.35666	11.5283	CCR1;IL10;SFRP2;RGCC;CXCL8;STC2;IFNA2;KDR;IGF2BP3;FGF2;SH3GL2;APLN
SHvsP	GO_Biological_Process_2021	anterograde trans-synaptic signaling (GO:0098916)	10/244	0.0075358	0.110884	2.59562	12.6876	UNC13C;GRIN2A;GABRB1;PTCHD1;NPY5R;PENK;KCNC4;GAD2;NPTX2;GRIA3
SHvsP	GO_Biological_Process_2021	positive regulation of response to external stimulus (GO:0032103)	7/139	0.00836147	0.122064	3.20776	15.3463	IL15;S100A12;TREM2;DDX60;S100A9;S100A8;CCL26
SHvsP	GO_Biological_Process_2021	aminoglycan biosynthetic process (GO:0006023)	4/49	0.00860353	0.124617	5.35106	25.4474	HS3ST3B1;B3GALT2;HS3ST5;HS6ST2
SHvsP	GO_Biological_Process_2021	alpha-amino acid biosynthetic process (GO:1901607)	2/9	0.00905067	0.125223	17.128	80.586	SDS;SDSL
SHvsP	GO_Biological_Process_2021	regulation of cell adhesion molecule production (GO:0060353)	2/9	0.00905067	0.125223	17.128	80.586	COLEC12;CXCL8
SHvsP	GO_Biological_Process_2021	regulation of leukocyte degranulation (GO:0043300)	2/9	0.00905067	0.125223	17.128	80.586	LYN;ADGRE2
SHvsP	GO_Biological_Process_2021	embryonic digestive tract morphogenesis (GO:0048557)	2/9	0.00905067	0.125223	17.128	80.586	PDGFRA;FOXF1
SHvsP	GO_Biological_Process_2021	peptidyl-cysteine modification (GO:0018198)	2/9	0.00905067	0.125223	17.128	80.586	S100A9;S100A8
SHvsP	GO_Biological_Process_2021	positive regulation of smooth muscle contraction (GO:0045987)	2/9	0.00905067	0.125223	17.128	80.586	MYOCD;NMU
SHvsP	GO_Biological_Process_2021	inositol lipid-mediated signaling (GO:0048017)	4/51	0.00989108	0.135838	5.12283	23.6476	PDGFRA;PLCZ1;MUC5AC;KCNH1
SHvsP	GO_Biological_Process_2021	negative regulation of cell migration (GO:0030336)	7/144	0.0100486	0.136986	3.0899	14.2145	PTPRU;TMEFF2;SFRP2;NAV3;NEXMIF;CHRD;FGF2
SHvsP	GO_Biological_Process_2021	regulation of intrinsic apoptotic signaling pathway (GO:2001242)	4/52	0.0105792	0.142129	5.01585	22.8164	LCK;PLAUR;S100A9;S100A8
SHvsP	GO_Biological_Process_2021	sprouting angiogenesis (GO:0002040)	4/52	0.0105792	0.142129	5.01585	22.8164	FLT4;KDR;TEK;FGF2
SHvsP	GO_Biological_Process_2021	bile acid and bile salt transport (GO:0015721)	3/28	0.0107454	0.143088	7.20917	32.6812	SLC10A4;SLC10A2;ABCB11
SHvsP	GO_Biological_Process_2021	apical protein localization (GO:0045176)	2/10	0.0111908	0.143088	14.9863	67.3283	MAL;SHROOM3
SHvsP	GO_Biological_Process_2021	regulation of cell-cell adhesion mediated by integrin (GO:0033632)	2/10	0.0111908	0.143088	14.9863	67.3283	PODXL;ADA
SHvsP	GO_Biological_Process_2021	regulation of low-density lipoprotein particle clearance (GO:0010988)	2/10	0.0111908	0.143088	14.9863	67.3283	TREM2;FGF21
SHvsP	GO_Biological_Process_2021	granulocyte activation (GO:0036230)	2/10	0.0111908	0.143088	14.9863	67.3283	CXCL8;IL15
SHvsP	GO_Biological_Process_2021	negative regulation of cell-cell adhesion mediated by cadherin (GO:2000048)	2/10	0.0111908	0.143088	14.9863	67.3283	RGCC;NEXMIF
SHvsP	GO_Biological_Process_2021	negative regulation of toll-like receptor 4 signaling pathway (GO:0034144)	2/10	0.0111908	0.143088	14.9863	67.3283	LYN;TREM2
SHvsP	GO_Biological_Process_2021	negative regulation of wound healing (GO:0061045)	3/29	0.0118412	0.150367	6.93155	30.7495	MYOZ1;FGF2;AJAP1
SHvsP	GO_Biological_Process_2021	regulation of cytokine production (GO:0001817)	7/150	0.0123858	0.156213	2.95934	12.9951	LYN;IL10;RGCC;IL15;CRTAM;TREM2;IGF2BP3
SHvsP	GO_Biological_Process_2021	regulation of blood vessel endothelial cell migration (GO:0043535)	4/55	0.0128265	0.158615	4.72008	20.5618	ANGPT2;RGCC;KDR;FGF2
SHvsP	GO_Biological_Process_2021	negative regulation of cytokine-mediated signaling pathway (GO:0001960)	4/55	0.0128265	0.158615	4.72008	20.5618	PALM3;TREM2;DCST1;USP18
SHvsP	GO_Biological_Process_2021	artery morphogenesis (GO:0048844)	3/30	0.012999	0.158615	6.67448	28.9865	FOXF1;GJA5;STRA6
SHvsP	GO_Biological_Process_2021	respiratory tube development (GO:0030323)	3/30	0.012999	0.158615	6.67448	28.9865	FOXF1;FGF2;STRA6
SHvsP	GO_Biological_Process_2021	chemical synaptic transmission (GO:0007268)	11/306	0.0131418	0.158615	2.26476	9.81084	UNC13C;GRIN2A;GABRB1;PTCHD1;NPY5R;PENK;KCNC4;GRIK3;GAD2;NPTX2;GRIA3
SHvsP	GO_Biological_Process_2021	regulation of mast cell activation involved in immune response (GO:0033006)	2/11	0.0135297	0.158615	13.3205	57.3161	LYN;ADGRE2
SHvsP	GO_Biological_Process_2021	regulation of myeloid leukocyte mediated immunity (GO:0002886)	2/11	0.0135297	0.158615	13.3205	57.3161	LYN;ADGRE2
SHvsP	GO_Biological_Process_2021	regulation of T-helper 2 cell cytokine production (GO:2000551)	2/11	0.0135297	0.158615	13.3205	57.3161	RSAD2;IFNA2
SHvsP	GO_Biological_Process_2021	regulation of toll-like receptor 2 signaling pathway (GO:0034135)	2/11	0.0135297	0.158615	13.3205	57.3161	LYN;TREM2
SHvsP	GO_Biological_Process_2021	induction of positive chemotaxis (GO:0050930)	2/11	0.0135297	0.158615	13.3205	57.3161	CXCL8;NTF3
SHvsP	GO_Biological_Process_2021	negative regulation of signal transduction (GO:0009968)	10/267	0.0135931	0.158615	2.36053	10.146	LYN;IL10;SFRP2;CXCL8;RGS14;AHSG;DCC;PALM3;FGF2;APLN
SHvsP	GO_Biological_Process_2021	adenylate cyclase-activating G protein-coupled receptor signaling pathway (GO:0007189)	6/118	0.0136029	0.158615	3.2338	13.8971	ADGRG3;ADGRE2;ADGRD1;GPR12;LPAR1;ADGRL4
SHvsP	GO_Biological_Process_2021	negative regulation of peptidyl-tyrosine phosphorylation (GO:0050732)	3/31	0.0142191	0.163741	6.43578	27.3724	SFRP2;NTF3;SAMSN1
SHvsP	GO_Biological_Process_2021	positive regulation of locomotion (GO:0040017)	3/31	0.0142191	0.163741	6.43578	27.3724	TREM2;DUOX2;CCL26
SHvsP	GO_Biological_Process_2021	regulation of chemotaxis (GO:0050920)	3/32	0.0155021	0.174128	6.21354	25.8905	PDGFRA;TREM2;CCL26
SHvsP	GO_Biological_Process_2021	regulation of NMDA receptor activity (GO:2000310)	3/32	0.0155021	0.174128	6.21354	25.8905	GRIN2A;NEFL;GRIA3
SHvsP	GO_Biological_Process_2021	hematopoietic progenitor cell differentiation (GO:0002244)	3/32	0.0155021	0.174128	6.21354	25.8905	FLT1;FLT4;KDR
SHvsP	GO_Biological_Process_2021	regulation of cation channel activity (GO:2001257)	5/89	0.0159583	0.174128	3.58718	14.843	JPH2;GRIN2A;NEFL;GRIA3;SHANK1
SHvsP	GO_Biological_Process_2021	regulation of B cell apoptotic process (GO:0002902)	2/12	0.0160603	0.174128	11.9878	49.5264	IL10;LYN
SHvsP	GO_Biological_Process_2021	calcium ion-regulated exocytosis of neurotransmitter (GO:0048791)	2/12	0.0160603	0.174128	11.9878	49.5264	UNC13C;RIMS3
SHvsP	GO_Biological_Process_2021	glomerular visceral epithelial cell differentiation (GO:0072112)	2/12	0.0160603	0.174128	11.9878	49.5264	NPHS1;PODXL
SHvsP	GO_Biological_Process_2021	glycine metabolic process (GO:0006544)	2/12	0.0160603	0.174128	11.9878	49.5264	SDS;SDSL
SHvsP	GO_Biological_Process_2021	thyroid hormone generation (GO:0006590)	2/12	0.0160603	0.174128	11.9878	49.5264	FOXE1;DUOX2
SHvsP	GO_Biological_Process_2021	negative regulation of B cell proliferation (GO:0030889)	2/12	0.0160603	0.174128	11.9878	49.5264	IL10;LYN
SHvsP	GO_Biological_Process_2021	response to lipopolysaccharide (GO:0032496)	7/159	0.0165916	0.177808	2.78283	11.4064	IL10;CXCL8;PALM3;PDE4B;CCR5;S100A9;S100A8
SHvsP	GO_Biological_Process_2021	protein autophosphorylation (GO:0046777)	7/159	0.0165916	0.177808	2.78283	11.4064	LYN;PDGFRA;NTRK2;FLT1;FLT4;KDR;TEK
SHvsP	GO_Biological_Process_2021	cellular response to chemokine (GO:1990869)	4/60	0.0172073	0.183347	4.29755	17.4584	CCR1;CXCL8;CCL22;CCL26
SHvsP	GO_Biological_Process_2021	toll-like receptor signaling pathway (GO:0002224)	5/91	0.0174145	0.184494	3.5034	14.1904	COLEC12;SFTPA2;SFTPA1;S100A9;S100A8
SHvsP	GO_Biological_Process_2021	retinoid metabolic process (GO:0001523)	5/92	0.0181745	0.187014	3.46295	13.8786	AWAT2;RDH10;CYP2S1;ALDH8A1;STRA6
SHvsP	GO_Biological_Process_2021	O-glycan processing (GO:0016266)	4/61	0.0181822	0.187014	4.22194	16.9186	CHST4;MUC4;GALNT10;MUC5AC
SHvsP	GO_Biological_Process_2021	pattern recognition receptor signaling pathway (GO:0002221)	4/61	0.0181822	0.187014	4.22194	16.9186	SFTPA2;SFTPA1;S100A9;S100A8
SHvsP	GO_Biological_Process_2021	cellular response to vascular endothelial growth factor stimulus (GO:0035924)	3/34	0.0182576	0.187014	5.81207	23.2667	FLT1;FLT4;KDR
SHvsP	GO_Biological_Process_2021	negative regulation of blood vessel endothelial cell migration (GO:0043537)	3/34	0.0182576	0.187014	5.81207	23.2667	ANGPT2;RGCC;FGF2
SHvsP	GO_Biological_Process_2021	positive regulation of pri-miRNA transcription by RNA polymerase II (GO:1902895)	3/34	0.0182576	0.187014	5.81207	23.2667	IL10;FGF2;APLN
SHvsP	GO_Biological_Process_2021	regulation of homotypic cell-cell adhesion (GO:0034110)	2/13	0.0187757	0.189185	10.8975	43.3195	LYN;PLAUR
SHvsP	GO_Biological_Process_2021	negative regulation of macromolecule biosynthetic process (GO:0010558)	2/13	0.0187757	0.189185	10.8975	43.3195	IL10;TMEFF2
SHvsP	GO_Biological_Process_2021	positive regulation of vascular endothelial cell proliferation (GO:1905564)	2/13	0.0187757	0.189185	10.8975	43.3195	FGF2;APLN
SHvsP	GO_Biological_Process_2021	respiratory system development (GO:0060541)	3/35	0.0197306	0.19667	5.63016	22.1017	FOXF1;FGF2;STRA6
SHvsP	GO_Biological_Process_2021	lung development (GO:0030324)	3/35	0.0197306	0.19667	5.63016	22.1017	FOXF1;FGF2;STRA6
SHvsP	GO_Biological_Process_2021	antimicrobial humoral immune response mediated by antimicrobial peptide (GO:0061844)	4/64	0.0213098	0.204972	4.01022	15.4337	CXCL8;S100A12;S100A9;CAMP
SHvsP	GO_Biological_Process_2021	branching involved in blood vessel morphogenesis (GO:0001569)	2/14	0.0216691	0.204972	9.98882	38.2759	SFRP2;KDR
SHvsP	GO_Biological_Process_2021	carbohydrate transport (GO:0008643)	2/14	0.0216691	0.204972	9.98882	38.2759	SLC5A1;SLC2A5
SHvsP	GO_Biological_Process_2021	retinal metabolic process (GO:0042574)	2/14	0.0216691	0.204972	9.98882	38.2759	RDH10;ALDH8A1
SHvsP	GO_Biological_Process_2021	secretion (GO:0046903)	2/14	0.0216691	0.204972	9.98882	38.2759	SLC22A16;ABCB11
SHvsP	GO_Biological_Process_2021	vascular endothelial growth factor signaling pathway (GO:0038084)	2/14	0.0216691	0.204972	9.98882	38.2759	FLT4;KDR
SHvsP	GO_Biological_Process_2021	negative regulation of bone mineralization (GO:0030502)	2/14	0.0216691	0.204972	9.98882	38.2759	CCR1;AHSG
SHvsP	GO_Biological_Process_2021	negative regulation of cell activation (GO:0050866)	2/14	0.0216691	0.204972	9.98882	38.2759	PDGFRA;TREM2
SHvsP	GO_Biological_Process_2021	negative regulation of fibroblast growth factor receptor signaling pathway (GO:0040037)	2/14	0.0216691	0.204972	9.98882	38.2759	FGF2;APLN
SHvsP	GO_Biological_Process_2021	neuromuscular process controlling balance (GO:0050885)	2/14	0.0216691	0.204972	9.98882	38.2759	USH1C;SHANK1
SHvsP	GO_Biological_Process_2021	calcium ion homeostasis (GO:0055074)	5/97	0.0223026	0.208833	3.27391	12.4509	CCR1;SLC24A2;CDH5;JPH2;STC2
SHvsP	GO_Biological_Process_2021	glycosaminoglycan biosynthetic process (GO:0006024)	5/97	0.0223026	0.208833	3.27391	12.4509	HS3ST3B1;OMD;HS3ST5;B4GALT6;HS6ST2
SHvsP	GO_Biological_Process_2021	regulation of actin cytoskeleton reorganization (GO:2000249)	3/37	0.0228677	0.210929	5.29843	20.0176	PDGFRA;NTF3;TEK
SHvsP	GO_Biological_Process_2021	regulation of vascular associated smooth muscle cell proliferation (GO:1904705)	3/37	0.0228677	0.210929	5.29843	20.0176	IL10;FGF2;APLN
SHvsP	GO_Biological_Process_2021	glutamate receptor signaling pathway (GO:0007215)	3/37	0.0228677	0.210929	5.29843	20.0176	GRIN2A;GRIK3;GRIA3
SHvsP	GO_Biological_Process_2021	regulation of neuron apoptotic process (GO:0043523)	5/98	0.0231952	0.212891	3.23854	12.1893	FOXQ1;NTRK2;CLCF1;NTF3;TREM2
SHvsP	GO_Biological_Process_2021	embryonic organ development (GO:0048568)	4/66	0.0235668	0.215236	3.88047	14.5437	CXCL8;FOXE1;KDR;STRA6
SHvsP	GO_Biological_Process_2021	negative regulation of endothelial cell migration (GO:0010596)	3/38	0.0245319	0.217451	5.14679	19.0832	ANGPT2;RGCC;FGF2
SHvsP	GO_Biological_Process_2021	cardiac myofibril assembly (GO:0055003)	2/15	0.0247338	0.217451	9.21998	34.1101	PDGFRA;NRAP
SHvsP	GO_Biological_Process_2021	central nervous system neuron development (GO:0021954)	2/15	0.0247338	0.217451	9.21998	34.1101	NTRK2;B4GALT6
SHvsP	GO_Biological_Process_2021	regulation of lymphocyte activation (GO:0051249)	2/15	0.0247338	0.217451	9.21998	34.1101	LCK;CRTAM
SHvsP	GO_Biological_Process_2021	eye photoreceptor cell development (GO:0042462)	2/15	0.0247338	0.217451	9.21998	34.1101	RPGRIP1;USH1C
SHvsP	GO_Biological_Process_2021	positive regulation of endothelial cell chemotaxis (GO:2001028)	2/15	0.0247338	0.217451	9.21998	34.1101	KDR;FGF2
SHvsP	GO_Biological_Process_2021	positive regulation of heterotypic cell-cell adhesion (GO:0034116)	2/15	0.0247338	0.217451	9.21998	34.1101	IL10;LCK
SHvsP	GO_Biological_Process_2021	vascular endothelial growth factor receptor signaling pathway (GO:0048010)	4/67	0.0247476	0.217451	3.81868	14.1254	FLT1;FLT4;KDR;CLEC14A
SHvsP	GO_Biological_Process_2021	regulation of myeloid cell differentiation (GO:0045637)	4/68	0.0259636	0.227059	3.75882	13.7237	LYN;NFE2;HOXA9;HOXA5
SHvsP	GO_Biological_Process_2021	cell chemotaxis (GO:0060326)	4/69	0.0272148	0.229105	3.7008	13.3377	CCR1;PDGFRA;LPAR1;CCR5
SHvsP	GO_Biological_Process_2021	extracellular structure organization (GO:0043062)	8/216	0.0273752	0.229105	2.32465	8.36438	MMP7;ADAMTS19;ELN;KDR;COL8A2;TNC;FGF2;ADAMTS20
SHvsP	GO_Biological_Process_2021	regulation of amyloid-beta clearance (GO:1900221)	2/16	0.0279637	0.229105	8.56098	30.6213	MYOCD;TREM2
SHvsP	GO_Biological_Process_2021	regulation of leukocyte activation (GO:0002694)	2/16	0.0279637	0.229105	8.56098	30.6213	LYN;LCK
SHvsP	GO_Biological_Process_2021	regulation of mast cell degranulation (GO:0043304)	2/16	0.0279637	0.229105	8.56098	30.6213	LYN;ADGRE2
SHvsP	GO_Biological_Process_2021	dendritic cell chemotaxis (GO:0002407)	2/16	0.0279637	0.229105	8.56098	30.6213	CCR1;CCR5
SHvsP	GO_Biological_Process_2021	mesenchyme development (GO:0060485)	2/16	0.0279637	0.229105	8.56098	30.6213	SFRP2;FOXF1
SHvsP	GO_Biological_Process_2021	negative regulation of type I interferon-mediated signaling pathway (GO:0060339)	2/16	0.0279637	0.229105	8.56098	30.6213	DCST1;USP18
SHvsP	GO_Biological_Process_2021	neutrophil activation (GO:0042119)	2/16	0.0279637	0.229105	8.56098	30.6213	CXCL8;IL15
SHvsP	GO_Biological_Process_2021	platelet-derived growth factor receptor signaling pathway (GO:0048008)	2/16	0.0279637	0.229105	8.56098	30.6213	PDGFRA;RGS14
SHvsP	GO_Biological_Process_2021	external encapsulating structure organization (GO:0045229)	8/217	0.0280326	0.229105	2.31341	8.26903	MMP7;ADAMTS19;ELN;KDR;COL8A2;TNC;FGF2;ADAMTS20
SHvsP	GO_Biological_Process_2021	digestive tract development (GO:0048565)	3/40	0.0280512	0.229105	4.86809	17.3972	CXCL8;FOXF1;STRA6
SHvsP	GO_Biological_Process_2021	lymphocyte migration (GO:0072676)	3/40	0.0280512	0.229105	4.86809	17.3972	CCL22;CRTAM;CCL26
SHvsP	GO_Biological_Process_2021	synaptic vesicle exocytosis (GO:0016079)	3/40	0.0280512	0.229105	4.86809	17.3972	UNC13C;PCLO;RIMS3
SHvsP	GO_Biological_Process_2021	positive regulation of intrinsic apoptotic signaling pathway (GO:2001244)	3/40	0.0280512	0.229105	4.86809	17.3972	LCK;S100A9;S100A8
SHvsP	GO_Biological_Process_2021	wound healing (GO:0042060)	4/70	0.0285015	0.231763	3.64454	12.9665	PDGFRA;MYOZ1;FGF2;DCBLD2
SHvsP	GO_Biological_Process_2021	regulation of immune response (GO:0050776)	7/179	0.0293645	0.237737	2.45673	8.66726	LYN;COLEC12;RSAD2;IL15;CRTAM;TREML2;TREM2
SHvsP	GO_Biological_Process_2021	negative regulation of neuron apoptotic process (GO:0043524)	4/71	0.0298239	0.239366	3.58996	12.6096	FOXQ1;NTRK2;CLCF1;NTF3
SHvsP	GO_Biological_Process_2021	phosphatidylinositol-mediated signaling (GO:0048015)	4/71	0.0298239	0.239366	3.58996	12.6096	PDGFRA;PLCZ1;MUC5AC;KCNH1
SHvsP	GO_Biological_Process_2021	pulmonary valve morphogenesis (GO:0003184)	2/17	0.0313522	0.246301	7.98984	27.6646	GJA5;STRA6
SHvsP	GO_Biological_Process_2021	embryo development ending in birth or egg hatching (GO:0009792)	2/17	0.0313522	0.246301	7.98984	27.6646	CELF4;RAI2
SHvsP	GO_Biological_Process_2021	sulfation (GO:0051923)	2/17	0.0313522	0.246301	7.98984	27.6646	HS3ST5;CHST4
SHvsP	GO_Biological_Process_2021	negative regulation of amyloid-beta formation (GO:1902430)	2/17	0.0313522	0.246301	7.98984	27.6646	NTRK2;RTN1
SHvsP	GO_Biological_Process_2021	negative regulation of vascular associated smooth muscle cell proliferation (GO:1904706)	2/17	0.0313522	0.246301	7.98984	27.6646	IL10;APLN
SHvsP	GO_Biological_Process_2021	negative regulation of proteolysis (GO:0045861)	3/43	0.0338048	0.264051	4.50229	15.25	IL10;SERPINB3;SERPINB4
SHvsP	GO_Biological_Process_2021	modulation of chemical synaptic transmission (GO:0050804)	5/109	0.0345536	0.264051	2.89438	9.74029	RIMS3;NMU;NTF3;GRIK3;NPTX2
SHvsP	GO_Biological_Process_2021	cell migration involved in sprouting angiogenesis (GO:0002042)	2/18	0.0348935	0.264051	7.49009	25.1327	KDR;FGF2
SHvsP	GO_Biological_Process_2021	regulation of establishment or maintenance of cell polarity (GO:0032878)	2/18	0.0348935	0.264051	7.49009	25.1327	CDH5;TEK
SHvsP	GO_Biological_Process_2021	chromatin disassembly (GO:0031498)	2/18	0.0348935	0.264051	7.49009	25.1327	NFE2;H2BC1
SHvsP	GO_Biological_Process_2021	dendritic cell migration (GO:0036336)	2/18	0.0348935	0.264051	7.49009	25.1327	CCR1;CCR5
SHvsP	GO_Biological_Process_2021	synaptic transmission, glutamatergic (GO:0035249)	2/18	0.0348935	0.264051	7.49009	25.1327	UNC13C;GRIK3
SHvsP	GO_Biological_Process_2021	nucleosome disassembly (GO:0006337)	2/18	0.0348935	0.264051	7.49009	25.1327	NFE2;H2BC1
SHvsP	GO_Biological_Process_2021	positive regulation of cell migration involved in sprouting angiogenesis (GO:0090050)	2/18	0.0348935	0.264051	7.49009	25.1327	KDR;FGF2
SHvsP	GO_Biological_Process_2021	positive regulation of cytosolic calcium ion concentration (GO:0007204)	6/147	0.0353319	0.266282	2.56488	8.57431	CCR1;PDGFRA;JPH2;PLCZ1;LPAR1;CCR5
SHvsP	GO_Biological_Process_2021	branching morphogenesis of an epithelial tube (GO:0048754)	3/44	0.0358483	0.267995	4.39226	14.6195	SFRP2;KDR;FGF2
SHvsP	GO_Biological_Process_2021	cardiac ventricle morphogenesis (GO:0003208)	3/44	0.0358483	0.267995	4.39226	14.6195	SFRP2;NPY5R;FOXF1
SHvsP	GO_Biological_Process_2021	regulation of cytosolic calcium ion concentration (GO:0051480)	6/148	0.0363361	0.270551	2.54669	8.44213	CCR1;SCGN;PDGFRA;PLCZ1;LPAR1;CCR5
SHvsP	GO_Biological_Process_2021	cellular divalent inorganic cation homeostasis (GO:0072503)	5/111	0.0369305	0.273876	2.83948	9.36664	CCR1;SLC24A2;CDH5;LCK;STC2
SHvsP	GO_Biological_Process_2021	inflammatory response (GO:0006954)	8/230	0.0375923	0.277674	2.17649	7.14096	CCR1;CCL22;CXCL8;IFNA2;CCR5;S100A9;S100A8;CCL26
SHvsP	GO_Biological_Process_2021	regulation of pri-miRNA transcription by RNA polymerase II (GO:1902893)	3/45	0.037954	0.278328	4.28746	14.0259	IL10;FGF2;APLN
SHvsP	GO_Biological_Process_2021	long-term memory (GO:0007616)	2/19	0.0385816	0.278328	7.04914	22.9448	RGS14;SHANK1
SHvsP	GO_Biological_Process_2021	negative regulation of amyloid precursor protein catabolic process (GO:1902992)	2/19	0.0385816	0.278328	7.04914	22.9448	NTRK2;RTN1
SHvsP	GO_Biological_Process_2021	neuromuscular process (GO:0050905)	2/19	0.0385816	0.278328	7.04914	22.9448	SHANK1;STRA6
SHvsP	GO_Biological_Process_2021	positive regulation of actin cytoskeleton reorganization (GO:2000251)	2/19	0.0385816	0.278328	7.04914	22.9448	NTF3;TEK
SHvsP	GO_Biological_Process_2021	positive regulation of focal adhesion assembly (GO:0051894)	2/19	0.0385816	0.278328	7.04914	22.9448	KDR;TEK
SHvsP	GO_Biological_Process_2021	negative regulation of blood vessel morphogenesis (GO:2000181)	4/78	0.0400866	0.287202	3.24921	10.4518	RGCC;TEK;THBS2;HOXA5
SHvsP	GO_Biological_Process_2021	regulation of B cell proliferation (GO:0030888)	3/46	0.0401215	0.287202	4.18754	13.4665	IL10;LYN;CLCF1
SHvsP	GO_Biological_Process_2021	negative regulation of protein phosphorylation (GO:0001933)	6/152	0.040535	0.288968	2.47641	7.93835	LYN;SFRP2;NTF3;PPEF2;SAMSN1;SH3GL2
SHvsP	GO_Biological_Process_2021	negative regulation of cell motility (GO:2000146)	5/114	0.0406799	0.288968	2.7609	8.84047	PTPRU;TMEFF2;SFRP2;NAV3;CHRD
SHvsP	GO_Biological_Process_2021	regulation of wound healing (GO:0061041)	3/47	0.0423504	0.292302	4.09216	12.9385	FGF2;DUOX2;AJAP1
SHvsP	GO_Biological_Process_2021	protein-DNA complex disassembly (GO:0032986)	2/20	0.0424106	0.292302	6.65718	21.0391	NFE2;H2BC1
SHvsP	GO_Biological_Process_2021	cardiac ventricle development (GO:0003231)	2/20	0.0424106	0.292302	6.65718	21.0391	GJA5;STRA6
SHvsP	GO_Biological_Process_2021	regulation of fibroblast growth factor receptor signaling pathway (GO:0040036)	2/20	0.0424106	0.292302	6.65718	21.0391	FGF2;APLN
SHvsP	GO_Biological_Process_2021	regulation of smooth muscle contraction (GO:0006940)	2/20	0.0424106	0.292302	6.65718	21.0391	MYOCD;NMU
SHvsP	GO_Biological_Process_2021	regulation of tissue remodeling (GO:0034103)	2/20	0.0424106	0.292302	6.65718	21.0391	IL15;FLT4
SHvsP	GO_Biological_Process_2021	glucose transmembrane transport (GO:1904659)	2/20	0.0424106	0.292302	6.65718	21.0391	SLC5A1;SLC2A5
SHvsP	GO_Biological_Process_2021	modulation by symbiont of entry into host (GO:0052372)	2/20	0.0424106	0.292302	6.65718	21.0391	CXCL8;HS3ST5
SHvsP	GO_Biological_Process_2021	positive regulation of cell adhesion (GO:0045785)	4/80	0.0433439	0.297628	3.16338	9.92856	SFRP2;CHRD;LIF;FBLN2
SHvsP	GO_Biological_Process_2021	cognition (GO:0050890)	3/48	0.0446403	0.303161	4.00102	12.4396	PTCHD1;SHROOM4;STRA6
SHvsP	GO_Biological_Process_2021	myelination (GO:0042552)	3/48	0.0446403	0.303161	4.00102	12.4396	NFASC;MAL;B4GALT6
SHvsP	GO_Biological_Process_2021	negative regulation of MAP kinase activity (GO:0043407)	3/48	0.0446403	0.303161	4.00102	12.4396	LYN;SERPINB3;RGS14
SHvsP	GO_Biological_Process_2021	cellular protein metabolic process (GO:0044267)	12/417	0.0449038	0.303838	1.79502	5.57035	SFTPA2;AHSG;STC2;PENK;TNC;MAGEA2;IGF2BP3;PADI4;MAGEC2;SFTPA1;BMP15;ZAR1
SHvsP	GO_Biological_Process_2021	negative regulation of response to external stimulus (GO:0032102)	5/118	0.0460261	0.307069	2.66263	8.19703	IL10;CDH5;TEK;FGF2;AJAP1
SHvsP	GO_Biological_Process_2021	calcium ion transport into cytosol (GO:0060402)	2/21	0.046375	0.307069	6.30648	19.3672	GRIN2A;JPH2
SHvsP	GO_Biological_Process_2021	negative regulation of response to wounding (GO:1903035)	2/21	0.046375	0.307069	6.30648	19.3672	FGF2;AJAP1
SHvsP	GO_Biological_Process_2021	neurotrophin signaling pathway (GO:0038179)	2/21	0.046375	0.307069	6.30648	19.3672	NTRK2;NTF3
SHvsP	GO_Biological_Process_2021	positive regulation of immune system process (GO:0002684)	2/21	0.046375	0.307069	6.30648	19.3672	RSAD2;IL15
SHvsP	GO_Biological_Process_2021	positive regulation of vascular associated smooth muscle cell proliferation (GO:1904707)	2/21	0.046375	0.307069	6.30648	19.3672	IL10;FGF2
SHvsP	GO_Biological_Process_2021	cellular response to lipopolysaccharide (GO:0071222)	5/120	0.0488487	0.322297	2.61605	7.89794	LYN;IL10;CXCL8;PDE4B;CCR5
SHvsP	Human_Phenotype_Ontology	Abnormality of the endocardium (HP:0004306)	4/41	0.00455699	0.655775	6.51069	35.0998	IL10;PDGFRA;ELN;GJA5
SHvsP	Human_Phenotype_Ontology	Mesangial abnormality (HP:0001966)	2/8	0.00711659	0.655775	19.9837	98.8261	NPHS1;ADA
SHvsP	Human_Phenotype_Ontology	Agnosia (HP:0010524)	2/8	0.00711659	0.655775	19.9837	98.8261	GRIN2A;TREM2
SHvsP	Human_Phenotype_Ontology	Annular pancreas (HP:0001734)	2/9	0.00905067	0.655775	17.128	80.586	FOXF1;STRA6
SHvsP	Human_Phenotype_Ontology	Full cheeks (HP:0000293)	4/57	0.0144816	0.655775	4.5415	19.2327	RPGRIP1;ELN;CLCF1;PAX1
SHvsP	Human_Phenotype_Ontology	Exertional dyspnea (HP:0002875)	2/13	0.0187757	0.655775	10.8975	43.3195	SFTPA2;COX6B1
SHvsP	Human_Phenotype_Ontology	Capillary hemangiomas (HP:0005306)	2/14	0.0216691	0.655775	9.98882	38.2759	FLT4;KDR
SHvsP	Human_Phenotype_Ontology	Chronic diarrhea (HP:0002028)	2/16	0.0279637	0.655775	8.56098	30.6213	SLC10A2;SLC5A1
SHvsP	Human_Phenotype_Ontology	Eosinophilia (HP:0001880)	2/16	0.0279637	0.655775	8.56098	30.6213	PDGFRA;ADA
SHvsP	Human_Phenotype_Ontology	Pruritus (HP:0000989)	4/70	0.0285015	0.655775	3.64454	12.9665	PDGFRA;THPO;ABCB11;ADA
SHvsP	Human_Phenotype_Ontology	Abnormal lung lobation (HP:0002101)	2/18	0.0348935	0.655775	7.49009	25.1327	FOXF1;STRA6
SHvsP	Human_Phenotype_Ontology	Granulocytopenia (HP:0001913)	2/19	0.0385816	0.655775	7.04914	22.9448	PDGFRA;ADA
SHvsP	Human_Phenotype_Ontology	Pulmonary hypertension (HP:0002092)	4/80	0.0433439	0.655775	3.16338	9.92856	SFTPA2;THPO;FOXF1;SNX10
SHvsP	Human_Phenotype_Ontology	Tetralogy of Fallot (HP:0001636)	4/80	0.0433439	0.655775	3.16338	9.92856	FOXF1;ELN;GJA5;STRA6
SHvsP	Human_Phenotype_Ontology	Fat malabsorption (HP:0002630)	2/21	0.046375	0.655775	6.30648	19.3672	SLC10A2;ABCB11
SHvsP	Human_Phenotype_Ontology	Hypothyroidism (HP:0000821)	5/120	0.0488487	0.655775	2.61605	7.89794	FOXE1;NPHS1;ELN;ADA;DUOX2
SHvsP	KEGG_2021_Human	Autoimmune thyroid disease	14/53	1.13335e-13	2.18736e-11	22.3007	664.749	IFNA5;IL10;IFNA4;IFNA7;IFNA13;IFNA6;IFNA14;IFNA1;IFNA16;IFNA17;IFNA2;IFNA8;IFNA10;IFNA21
SHvsP	KEGG_2021_Human	RIG-I-like receptor signaling pathway	14/70	7.07888e-12	6.83112e-10	15.5174	398.392	IFNA5;IFNA4;IFNA7;IFNA13;CXCL8;IFNA6;IFNA14;IFNA1;IFNA16;IFNA17;IFNA2;IFNA8;IFNA10;IFNA21
SHvsP	KEGG_2021_Human	Cytosolic DNA-sensing pathway	13/63	2.64757e-11	1.70327e-09	16.0921	391.92	IFNA5;IFNA4;IFNA7;IFNA13;IFNA6;IFNA14;IFNA1;IFNA16;IFNA17;IFNA2;IFNA8;IFNA10;IFNA21
SHvsP	KEGG_2021_Human	Cytokine-cytokine receptor interaction	24/295	1.47945e-10	7.13835e-09	5.61435	127.076	CCR1;IFNA5;IL10;IFNA4;IFNA7;IFNA13;IFNA6;CCL22;IFNA14;CXCL8;IFNA1;IL15;IFNA16;IFNA17;IFNA2;LIF;IFNA8;BMP15;THPO;CLCF1;CCR5;CCL26;IFNA10;IFNA21
SHvsP	KEGG_2021_Human	JAK-STAT signaling pathway	18/162	2.08876e-10	7.54552e-09	7.82292	174.367	IFNA5;IL10;PDGFRA;IFNA4;IFNA13;IFNA7;IFNA14;IFNA6;IFNA1;IFNA16;IL15;IFNA17;IFNA2;LIF;IFNA8;THPO;IFNA10;IFNA21
SHvsP	KEGG_2021_Human	PI3K-Akt signaling pathway	26/354	2.34576e-10	7.54552e-09	5.04345	111.83	IFNA5;IFNA4;IFNA7;IFNA6;FLT1;IFNA1;FLT4;IFNA2;LPAR1;TNC;THBS2;IFNA8;FGF2;NTF3;KDR;IFNA21;FGF21;PDGFRA;NTRK2;IFNA13;IFNA14;ANGPT2;IFNA16;IFNA17;TEK;IFNA10
SHvsP	KEGG_2021_Human	Kaposi sarcoma-associated herpesvirus infection	19/193	5.2827e-10	1.45652e-08	6.84525	146.224	CCR1;LYN;IFNA5;IFNA4;IFNA7;IFNA13;IFNA6;IFNA14;CXCL8;ANGPT2;IFNA1;IFNA16;IFNA17;IFNA2;IFNA8;FGF2;CCR5;IFNA10;IFNA21
SHvsP	KEGG_2021_Human	Toll-like receptor signaling pathway	14/104	1.75878e-09	4.24305e-08	9.63854	194.3	IFNA5;IFNA4;IFNA13;IFNA7;IFNA14;CXCL8;IFNA6;IFNA1;IFNA16;IFNA17;IFNA2;IFNA8;IFNA10;IFNA21
SHvsP	KEGG_2021_Human	Natural killer cell mediated cytotoxicity	14/131	3.62837e-08	7.78084e-07	7.40404	126.845	IFNA5;IFNA4;IFNA13;IFNA7;IFNA14;IFNA6;IFNA1;IFNA16;IFNA17;IFNA2;IFNA8;LCK;IFNA10;IFNA21
SHvsP	KEGG_2021_Human	Influenza A	15/172	1.79516e-07	3.46466e-06	5.91841	91.9307	IFNA5;IFNA4;IFNA13;IFNA7;IFNA14;CXCL8;IFNA6;RSAD2;IFNA1;IFNA16;IFNA17;IFNA2;IFNA8;IFNA10;IFNA21
SHvsP	KEGG_2021_Human	Human cytomegalovirus infection	17/225	2.1844e-07	3.83263e-06	5.08193	77.9403	CCR1;IFNA5;IFNA4;PDGFRA;IFNA7;IFNA13;IFNA6;IFNA14;CXCL8;IFNA1;IFNA16;IFNA17;IFNA2;IFNA8;CCR5;IFNA10;IFNA21
SHvsP	KEGG_2021_Human	Tuberculosis	15/180	3.24485e-07	4.85357e-06	5.62915	84.1053	IFNA5;IL10;IFNA4;IFNA13;IFNA7;IFNA14;IFNA6;IFNA1;IFNA16;IFNA17;IFNA2;IFNA8;CAMP;IFNA10;IFNA21
SHvsP	KEGG_2021_Human	NOD-like receptor signaling pathway	15/181	3.48597e-07	4.85357e-06	5.59495	83.1933	IFNA5;IFNA4;IFNA13;IFNA7;IFNA14;CXCL8;IFNA6;IFNA1;IFNA16;IFNA17;IFNA2;IFNA8;CAMP;IFNA10;IFNA21
SHvsP	KEGG_2021_Human	Hepatitis C	14/157	3.52073e-07	4.85357e-06	6.04979	89.8965	IFNA5;IFNA4;IFNA13;IFNA7;IFNA14;IFNA6;RSAD2;IFNA1;IFNA16;IFNA17;IFNA2;IFNA8;IFNA10;IFNA21
SHvsP	KEGG_2021_Human	Necroptosis	14/159	4.11244e-07	5.29133e-06	5.96574	87.7207	IFNA5;IFNA4;IFNA13;IFNA7;IFNA14;IFNA6;IFNA1;IFNA16;IFNA17;IFNA2;H2AC1;IFNA8;IFNA10;IFNA21
SHvsP	KEGG_2021_Human	Hepatitis B	14/162	5.16827e-07	6.07585e-06	5.84391	84.5939	IFNA5;IFNA4;IFNA13;IFNA7;IFNA14;CXCL8;IFNA6;IFNA1;IFNA16;IFNA17;IFNA2;IFNA8;IFNA10;IFNA21
SHvsP	KEGG_2021_Human	Measles	13/139	5.35179e-07	6.07585e-06	6.36102	91.8574	IFNA5;IFNA4;IFNA13;IFNA7;IFNA14;IFNA6;IFNA1;IFNA16;IFNA17;IFNA2;IFNA8;IFNA10;IFNA21
SHvsP	KEGG_2021_Human	Epstein-Barr virus infection	15/202	1.41183e-06	1.51379e-05	4.96129	66.8317	LYN;IFNA5;RBPJL;IFNA4;IFNA7;IFNA13;IFNA6;IFNA14;IFNA1;IFNA16;IFNA17;IFNA2;IFNA8;IFNA10;IFNA21
SHvsP	KEGG_2021_Human	Lipid and atherosclerosis	15/215	3.0672e-06	3.11563e-05	4.63571	58.8492	LYN;IFNA5;IFNA4;IFNA7;IFNA13;IFNA6;IFNA14;CXCL8;IFNA1;IFNA16;IFNA17;IFNA2;IFNA8;IFNA10;IFNA21
SHvsP	KEGG_2021_Human	Human immunodeficiency virus 1 infection	14/212	1.22561e-05	0.000118271	4.35699	49.2753	IFNA5;IFNA4;IFNA7;IFNA13;IFNA6;IFNA14;IFNA1;IFNA16;IFNA17;IFNA2;IFNA8;CCR5;IFNA10;IFNA21
SHvsP	KEGG_2021_Human	Coronavirus disease	14/232	3.35007e-05	0.000307887	3.9532	40.7335	IFNA5;IFNA4;IFNA7;IFNA13;IFNA6;IFNA14;CXCL8;IFNA1;IFNA16;IFNA17;IFNA2;IFNA8;IFNA10;IFNA21
SHvsP	KEGG_2021_Human	Human papillomavirus infection	17/331	3.91664e-05	0.000343596	3.34804	33.9749	IFNA5;RBPJL;IFNA4;IFNA7;IFNA13;IFNA6;IFNA14;IFNA1;IFNA16;IFNA17;IFNA2;TNC;THBS2;IFNA8;ATP6V1C2;IFNA10;IFNA21
SHvsP	KEGG_2021_Human	Neuroactive ligand-receptor interaction	16/341	0.000187412	0.00157263	3.03302	26.03	NPFFR2;GABRB1;NPY5R;LPAR1;GRIK3;NPY1R;GPR50;NTS;CRHR2;APLN;GRIN2A;GAL;PENK;NMU;GRIA3;NTSR2
SHvsP	KEGG_2021_Human	Pathways in cancer	21/531	0.000215417	0.00173231	2.55321	21.5566	IFNA5;IFNA4;PDGFRA;IFNA7;IFNA13;IFNA6;IFNA14;CXCL8;IFNA1;IL15;IFNA16;DCC;IFNA17;FLT4;IFNA2;LPAR1;IFNA8;FGF2;IFNA10;IFNA21;FGF21
SHvsP	KEGG_2021_Human	Rap1 signaling pathway	11/210	0.000765107	0.00590662	3.37394	24.2097	PDGFRA;GRIN2A;FLT1;ANGPT2;RGS14;FLT4;KDR;LPAR1;TEK;FGF2;FGF21
SHvsP	KEGG_2021_Human	Ras signaling pathway	11/232	0.0017083	0.0126808	3.03464	19.3375	PDGFRA;NTRK2;GRIN2A;FLT1;ANGPT2;FLT4;NTF3;KDR;TEK;FGF2;FGF21
SHvsP	KEGG_2021_Human	Glycosaminoglycan biosynthesis	5/53	0.00178001	0.0127238	6.2891	39.8172	HS3ST3B1;NDST3;HS3ST5;CHST4;HS6ST2
SHvsP	KEGG_2021_Human	Viral protein interaction with cytokine and cytokine receptor	6/100	0.00628139	0.0432967	3.85658	19.5535	CCR1;IL10;CXCL8;CCL22;CCR5;CCL26
SHvsP	KEGG_2021_Human	Calcium signaling pathway	9/240	0.0185744	0.121951	2.35939	9.40446	PDGFRA;NTRK2;GRIN2A;FLT1;PLCZ1;FLT4;KDR;FGF2;FGF21
SHvsP	KEGG_2021_Human	Rheumatoid arthritis	5/93	0.0189561	0.121951	3.42343	13.576	CXCL8;FLT1;IL15;TEK;ATP6V1C2
SHvsP	KEGG_2021_Human	MAPK signaling pathway	10/294	0.0246898	0.153714	2.13314	7.89554	PDGFRA;NTRK2;FLT1;ANGPT2;FLT4;NTF3;KDR;TEK;FGF2;FGF21
SHvsP	KEGG_2021_Human	Nicotine addiction	3/40	0.0280512	0.169184	4.86809	17.3972	GABRB1;GRIN2A;GRIA3
SHvsP	KEGG_2021_Human	Pertussis	4/76	0.036974	0.216242	3.33981	11.0132	IL10;CXCL8;SFTPA2;SFTPA1
SHvsP	KEGG_2021_Human	Malaria	3/50	0.0494006	0.280421	3.83037	11.521	IL10;CXCL8;THBS2
SHvsP	MGI_Mammalian_Phenotype_Level_4_2021	increased circulating thyroid-stimulating hormone level MP:0005122	5/15	3.11032e-06	0.00536841	30.2462	383.545	FOXE1;THPO;DIO3;DUOX2;HOXA5
SHvsP	MGI_Mammalian_Phenotype_Level_4_2021	abnormal cellular extravasation MP:0009858	5/27	7.10597e-05	0.037793	13.7399	131.243	CCR1;CDH5;CCR5;EDIL3;S100A9
SHvsP	MGI_Mammalian_Phenotype_Level_4_2021	increased retroperitoneal fat pad weight MP:0009304	4/15	8.604e-05	0.037793	21.9286	205.267	NPFFR2;GPR12;NPY5R;NPY1R
SHvsP	MGI_Mammalian_Phenotype_Level_4_2021	increased circulating leptin level MP:0005669	8/86	8.75852e-05	0.037793	6.24048	58.3042	NPFFR2;NTRK2;STEAP4;NPY5R;NMU;NPY1R;LIF;FGF21
SHvsP	MGI_Mammalian_Phenotype_Level_4_2021	small L4 dorsal root ganglion MP:0001021	3/7	0.00014832	0.0426666	45.1055	397.656	NTRK2;GAL;NTF3
SHvsP	MGI_Mammalian_Phenotype_Level_4_2021	abnormal thyroid gland development MP:0003421	3/7	0.00014832	0.0426666	45.1055	397.656	FOXE1;THPO;HOXA5
SHvsP	MGI_Mammalian_Phenotype_Level_4_2021	small geniculate ganglion MP:0001083	3/9	0.000347323	0.0743784	30.0673	239.494	NTRK2;NTF3;CHRD
SHvsP	MGI_Mammalian_Phenotype_Level_4_2021	small nodose ganglion MP:0001088	3/9	0.000347323	0.0743784	30.0673	239.494	NTRK2;NTF3;CHRD
SHvsP	MGI_Mammalian_Phenotype_Level_4_2021	increased circulating insulin level MP:0002079	10/163	0.000387836	0.0743784	3.98632	31.3122	NPFFR2;LIPE;NTRK2;NPY5R;NMU;NPY1R;GAST;LPIN1;DUOX2;FGF21
SHvsP	MGI_Mammalian_Phenotype_Level_4_2021	small petrosal ganglion MP:0001085	3/10	0.00049012	0.0845947	25.7706	196.394	NTRK2;NTF3;CHRD
SHvsP	MGI_Mammalian_Phenotype_Level_4_2021	no abnormal phenotype detected MP:0002169	45/1654	0.00061314	0.0962073	1.77237	13.11	RBPJL;RTN1;FLT1;FLT4;TNC;CHRD;CELF4;CLEC14A;PCDH12;DDX60;KALRN;HS6ST2;GALNT10;CDH5;TMEM26;PCLO;KCNT1;OLFML3;GJA5;RDH10;NDST3;PENK;NTF3;KDR;NEFL;HOXA5;SH3GL2;FGF21;IL10;PDGFRA;NTRK2;MYOCD;NPY1R;GAD2;PROX2;PAX1;SFRP2;GPRC5A;NPHS1;CYP2S1;FAM181B;PADI4;TEK;B4GALT6;LIMS2
SHvsP	MGI_Mammalian_Phenotype_Level_4_2021	abnormal response to cardiac infarction MP:0000343	5/43	0.000682825	0.098213	7.94818	57.9364	CCR1;MMP7;CCR5;FGF2;LIMS2
SHvsP	MGI_Mammalian_Phenotype_Level_4_2021	abnormal brown adipose tissue physiology MP:0011698	3/12	0.000876781	0.110147	20.0418	141.079	LIPE;LPIN1;FGF21
SHvsP	MGI_Mammalian_Phenotype_Level_4_2021	impaired cued conditioning behavior MP:0009456	6/68	0.000893429	0.110147	5.85663	41.1161	KCNT1;PTCHD1;OMD;PDE4B;DUOX2;SHANK1
SHvsP	MGI_Mammalian_Phenotype_Level_4_2021	abnormal spatial working memory MP:0008428	6/70	0.00104124	0.119812	5.67303	38.9587	NTRK2;GRIN2A;PDE4B;SORCS3;KALRN;SHANK1
SHvsP	MGI_Mammalian_Phenotype_Level_4_2021	abnormal CNS synaptic transmission MP:0002206	7/104	0.00169195	0.17747	4.37302	27.908	UNC13C;KCNT1;PCLO;TNC;GRIK3;PDE4B;SHANK1
SHvsP	MGI_Mammalian_Phenotype_Level_4_2021	abnormal vestibulocochlear ganglion morphology MP:0003703	3/15	0.00174797	0.17747	15.0291	95.424	RDH10;NTF3;CHRD
SHvsP	MGI_Mammalian_Phenotype_Level_4_2021	abnormal dorsal aorta morphology MP:0004787	5/55	0.00210081	0.186784	6.03692	37.2202	MYOCD;FLT1;FLT4;RDH10;KDR
SHvsP	MGI_Mammalian_Phenotype_Level_4_2021	decreased sensory neuron number MP:0000966	3/16	0.00212522	0.186784	13.8723	85.3683	NTRK2;GAL;NTF3
SHvsP	MGI_Mammalian_Phenotype_Level_4_2021	abnormal pericyte morphology MP:0003719	3/17	0.0025493	0.186784	12.8807	76.9229	FLVCR2;TEK;DCBLD2
SHvsP	MGI_Mammalian_Phenotype_Level_4_2021	midline facial cleft MP:0000108	3/17	0.0025493	0.186784	12.8807	76.9229	PDGFRA;RDH10;SHROOM3
SHvsP	MGI_Mammalian_Phenotype_Level_4_2021	abnormal sciatic nerve morphology MP:0002651	4/36	0.00282704	0.186784	7.52991	44.1895	NFASC;LPAR1;NEFL;LPIN1
SHvsP	MGI_Mammalian_Phenotype_Level_4_2021	abnormal glucose homeostasis MP:0002078	9/178	0.0028705	0.186784	3.23525	18.9368	IL10;TREH;NMU;NPY1R;TREM2;SLC5A1;LPIN1;CRHR2;FGF21
SHvsP	MGI_Mammalian_Phenotype_Level_4_2021	abnormal lipid level MP:0001547	6/88	0.00336314	0.186784	4.42367	25.1923	IL10;LIPE;PLVAP;SOAT1;LPIN1;FGF21
SHvsP	MGI_Mammalian_Phenotype_Level_4_2021	increased circulating interferon-gamma level MP:0008577	4/38	0.0034524	0.186784	7.08625	40.1697	IL10;LYN;SAMSN1;MUC5AC
SHvsP	MGI_Mammalian_Phenotype_Level_4_2021	abnormal thyroid follicle morphology MP:0004696	3/19	0.00354523	0.186784	11.2695	63.5842	ATCAY;THPO;DUOX2
SHvsP	MGI_Mammalian_Phenotype_Level_4_2021	seizures MP:0002064	7/120	0.00379256	0.186784	3.75076	20.9094	SLC10A4;PDGFRA;ATCAY;KCNT1;GAL;CELF4;GAD2
SHvsP	MGI_Mammalian_Phenotype_Level_4_2021	abnormal leukocyte adhesion MP:0003628	4/39	0.00379771	0.186784	6.88344	38.3639	CCR1;CCR5;CHST4;EDIL3
SHvsP	MGI_Mammalian_Phenotype_Level_4_2021	ureter obstruction MP:0003587	2/6	0.00389668	0.186784	29.9787	166.31	PDGFRA;UPK2
SHvsP	MGI_Mammalian_Phenotype_Level_4_2021	abnormal pulmonary vein morphology MP:0002726	2/6	0.00389668	0.186784	29.9787	166.31	FOXF1;NTF3
SHvsP	MGI_Mammalian_Phenotype_Level_4_2021	abnormal spinal cord grey matter morphology MP:0008503	2/6	0.00389668	0.186784	29.9787	166.31	NEFL;FGF2
SHvsP	MGI_Mammalian_Phenotype_Level_4_2021	abnormal zona pellucida morphology MP:0003696	2/6	0.00389668	0.186784	29.9787	166.31	FETUB;BMP15
SHvsP	MGI_Mammalian_Phenotype_Level_4_2021	delayed inner ear development MP:0004664	2/6	0.00389668	0.186784	29.9787	166.31	THPO;DUOX2
SHvsP	MGI_Mammalian_Phenotype_Level_4_2021	increased compact bone mass MP:0010961	2/6	0.00389668	0.186784	29.9787	166.31	NFE2;ZNF467
SHvsP	MGI_Mammalian_Phenotype_Level_4_2021	increased osteoid volume MP:0010926	2/6	0.00389668	0.186784	29.9787	166.31	ISLR;SNX10
SHvsP	MGI_Mammalian_Phenotype_Level_4_2021	abnormal cytokine level MP:0008713	5/64	0.00408298	0.186784	5.11369	28.13	IL10;PLAUR;SFTPA1;CCR5;USP18
SHvsP	MGI_Mammalian_Phenotype_Level_4_2021	abnormal vascular endothelial cell morphology MP:0006055	4/40	0.00416568	0.186784	6.69189	36.6774	CDH5;PLVAP;FLT1;TEK
SHvsP	MGI_Mammalian_Phenotype_Level_4_2021	long tibia MP:0004357	4/40	0.00416568	0.186784	6.69189	36.6774	ISLR;RAB39B;FGF21;COX6B1
SHvsP	MGI_Mammalian_Phenotype_Level_4_2021	neonatal lethality, incomplete penetrance MP:0011088	11/261	0.0042205	0.186784	2.67862	14.6462	NFE2;PDGFRA;NTRK2;NPHS1;FOXF1;GJA5;NTF3;LPAR1;ADAM22;CELF4;HOXA5
SHvsP	MGI_Mammalian_Phenotype_Level_4_2021	increased susceptibility to fungal infection MP:0005399	3/21	0.00474895	0.191351	10.0163	53.5856	CCR1;CCR5;CAMP
SHvsP	MGI_Mammalian_Phenotype_Level_4_2021	increased susceptibility to type IV hypersensitivity reaction MP:0005617	3/21	0.00474895	0.191351	10.0163	53.5856	CCR1;IL10;CCR5
SHvsP	MGI_Mammalian_Phenotype_Level_4_2021	abnormal spleen morphology MP:0000689	14/385	0.00500634	0.191351	2.30463	12.2078	LYN;HS3ST3B1;DCC;EYA2;BTBD16;GRIK3;NPY1R;KCNT1;PTCHD1;RUFY4;LRRC8C;PADI4;DUOX2;SHANK1
SHvsP	MGI_Mammalian_Phenotype_Level_4_2021	decreased angiogenesis MP:0005602	5/68	0.00529263	0.191351	4.78803	25.0962	CDH5;FOXF1;PLAUR;FLVCR2;DCBLD2
SHvsP	MGI_Mammalian_Phenotype_Level_4_2021	abnormal brown adipose tissue thermogenesis MP:0011699	2/7	0.00539604	0.191351	23.9817	125.235	NPFFR2;FGF21
SHvsP	MGI_Mammalian_Phenotype_Level_4_2021	abnormal vascular permeability MP:0001619	2/7	0.00539604	0.191351	23.9817	125.235	CDH5;CRHR2
SHvsP	MGI_Mammalian_Phenotype_Level_4_2021	abnormal vitamin A metabolism MP:0011233	2/7	0.00539604	0.191351	23.9817	125.235	RDH10;STRA6
SHvsP	MGI_Mammalian_Phenotype_Level_4_2021	decreased microglial cell activation MP:0020449	2/7	0.00539604	0.191351	23.9817	125.235	TREM2;CCR5
SHvsP	MGI_Mammalian_Phenotype_Level_4_2021	increased bone trabecula number MP:0010868	4/43	0.00541224	0.191351	6.17618	32.2341	NPFFR2;SNX10;SLC5A1;ZNF467
SHvsP	MGI_Mammalian_Phenotype_Level_4_2021	abnormal interferon level MP:0008750	3/22	0.00543233	0.191351	9.48865	49.487	IL10;TREM2;SFTPA1
SHvsP	MGI_Mammalian_Phenotype_Level_4_2021	increased circulating interleukin-6 level MP:0008596	5/70	0.00598375	0.195502	4.64024	23.752	IL10;LYN;LIF;TREM2;USP18
SHvsP	MGI_Mammalian_Phenotype_Level_4_2021	postnatal lethality, complete penetrance MP:0011085	14/394	0.00610156	0.195502	2.249	11.4681	PDGFRA;NTRK2;MYOCD;ANGPT2;FOXE1;ADAM22;NFASC;NPHS1;CLCF1;ADAM23;NTF3;KDR;SFTPA1;STRA6
SHvsP	MGI_Mammalian_Phenotype_Level_4_2021	decreased mean systemic arterial blood pressure MP:0004876	3/23	0.00617175	0.195502	9.01376	45.86	IL10;GJA5;FGF2
SHvsP	MGI_Mammalian_Phenotype_Level_4_2021	increased gonadal fat pad weight MP:0009285	3/23	0.00617175	0.195502	9.01376	45.86	GPR12;NPY1R;FGF21
SHvsP	MGI_Mammalian_Phenotype_Level_4_2021	abnormal white adipose tissue physiology MP:0005670	3/24	0.00696833	0.195502	8.5841	42.6319	LIPE;LPIN1;FGF21
SHvsP	MGI_Mammalian_Phenotype_Level_4_2021	small cochlear ganglion MP:0003986	2/8	0.00711659	0.195502	19.9837	98.8261	NTRK2;NTF3
SHvsP	MGI_Mammalian_Phenotype_Level_4_2021	abnormal circulating free fatty acids level MP:0001553	2/8	0.00711659	0.195502	19.9837	98.8261	LIPE;FGF21
SHvsP	MGI_Mammalian_Phenotype_Level_4_2021	small vertebral body MP:0004670	2/8	0.00711659	0.195502	19.9837	98.8261	CHRD;PAX1
SHvsP	MGI_Mammalian_Phenotype_Level_4_2021	abnormal thyroid gland physiology MP:0002876	2/8	0.00711659	0.195502	19.9837	98.8261	ATCAY;THPO
SHvsP	MGI_Mammalian_Phenotype_Level_4_2021	absent third pharyngeal arch MP:0010642	2/8	0.00711659	0.195502	19.9837	98.8261	RDH10;KDR
SHvsP	MGI_Mammalian_Phenotype_Level_4_2021	calcified muscle MP:0003199	2/8	0.00711659	0.195502	19.9837	98.8261	SGCA;AHSG
SHvsP	MGI_Mammalian_Phenotype_Level_4_2021	cecum inflammation MP:0009481	2/8	0.00711659	0.195502	19.9837	98.8261	CCR1;IL10
SHvsP	MGI_Mammalian_Phenotype_Level_4_2021	increased macrophage apoptosis MP:0011080	2/8	0.00711659	0.195502	19.9837	98.8261	PELI2;TREM2
SHvsP	MGI_Mammalian_Phenotype_Level_4_2021	abnormal vascular development MP:0000259	5/73	0.00713594	0.195502	4.43484	21.9197	CDH5;FLT1;FLT4;KDR;FLVCR2
SHvsP	MGI_Mammalian_Phenotype_Level_4_2021	abnormal Schwann cell morphology MP:0001106	3/25	0.0078231	0.206169	8.19349	39.744	ADAM22;LPAR1;LPIN1
SHvsP	MGI_Mammalian_Phenotype_Level_4_2021	increased myocardial infarction size MP:0003037	3/25	0.0078231	0.206169	8.19349	39.744	IL10;FGF2;LIMS2
SHvsP	MGI_Mammalian_Phenotype_Level_4_2021	decreased white adipose tissue amount MP:0001783	5/75	0.00798492	0.206169	4.30769	20.807	NPFFR2;LIPE;TMEFF2;LRRC8C;FGF21
SHvsP	MGI_Mammalian_Phenotype_Level_4_2021	abnormal sleep pattern MP:0001501	4/48	0.00800307	0.206169	5.47295	26.423	IL10;PTCHD1;FGF2;GRIA3
SHvsP	MGI_Mammalian_Phenotype_Level_4_2021	increased liver triglyceride level MP:0009355	5/76	0.00843465	0.214091	4.2468	20.2802	IL10;STEAP4;GPR12;LPIN1;FGF21
SHvsP	MGI_Mammalian_Phenotype_Level_4_2021	abnormal electroretinogram waveform feature MP:0012029	3/26	0.00873699	0.218551	7.83686	37.1482	RPGRIP1;USH1C;STRA6
SHvsP	MGI_Mammalian_Phenotype_Level_4_2021	abnormal pulmonary alveolar parenchyma morphology MP:0010901	2/9	0.00905067	0.220021	17.128	80.586	SFTPA1;HOXA5
SHvsP	MGI_Mammalian_Phenotype_Level_4_2021	cardiac edema MP:0012270	2/9	0.00905067	0.220021	17.128	80.586	MYOCD;RDH10
SHvsP	MGI_Mammalian_Phenotype_Level_4_2021	decreased oxygen consumption MP:0005290	4/52	0.0105792	0.232136	5.01585	22.8164	NMU;NPY1R;FGF21;APLN
SHvsP	MGI_Mammalian_Phenotype_Level_4_2021	decreased sensitivity to induced morbidity/mortality MP:0009764	4/52	0.0105792	0.232136	5.01585	22.8164	MMP7;PELI2;PDE4B;HABP2
SHvsP	MGI_Mammalian_Phenotype_Level_4_2021	decreased inguinal fat pad weight MP:0009293	3/28	0.0107454	0.232136	7.20917	32.6812	NPFFR2;ZNF467;LPIN1
SHvsP	MGI_Mammalian_Phenotype_Level_4_2021	decreased susceptibility to bacterial infection induced morbidity/mortality MP:0009789	3/28	0.0107454	0.232136	7.20917	32.6812	CCR1;IL15;S100A9
SHvsP	MGI_Mammalian_Phenotype_Level_4_2021	increased triglyceride level MP:0005317	3/28	0.0107454	0.232136	7.20917	32.6812	LIPE;NMU;LPIN1
SHvsP	MGI_Mammalian_Phenotype_Level_4_2021	increased circulating glucose level MP:0005559	7/146	0.0107885	0.232136	3.04513	13.7922	LIPE;STEAP4;GPR12;PLAUR;GAD2;LPIN1;FGF21
SHvsP	MGI_Mammalian_Phenotype_Level_4_2021	abnormal pituitary secretion MP:0001746	2/10	0.0111908	0.232136	14.9863	67.3283	GAL;KALRN
SHvsP	MGI_Mammalian_Phenotype_Level_4_2021	absent pharyngeal arches MP:0003874	2/10	0.0111908	0.232136	14.9863	67.3283	RDH10;CHRD
SHvsP	MGI_Mammalian_Phenotype_Level_4_2021	absent testes MP:0006415	2/10	0.0111908	0.232136	14.9863	67.3283	PENK;LHX9
SHvsP	MGI_Mammalian_Phenotype_Level_4_2021	decreased bone mineral density of femur MP:0020010	2/10	0.0111908	0.232136	14.9863	67.3283	SNX10;ZNF467
SHvsP	MGI_Mammalian_Phenotype_Level_4_2021	increased litter size MP:0001934	2/10	0.0111908	0.232136	14.9863	67.3283	NPFFR2;NPY1R
SHvsP	MGI_Mammalian_Phenotype_Level_4_2021	prolonged PR interval MP:0003896	4/53	0.0112975	0.232136	4.91323	22.0269	GJA5;PLAUR;GPR50;PADI4
SHvsP	MGI_Mammalian_Phenotype_Level_4_2021	decreased motor neuron number MP:0000939	4/53	0.0112975	0.232136	4.91323	22.0269	NTRK2;CLCF1;NTF3;LIF
SHvsP	MGI_Mammalian_Phenotype_Level_4_2021	decreased circulating iron level MP:0004151	4/54	0.0120464	0.244614	4.81472	21.2762	IL10;PLCZ1;DNER;GAST
SHvsP	MGI_Mammalian_Phenotype_Level_4_2021	abnormal phospholipid level MP:0004777	3/30	0.012999	0.254091	6.67448	28.9865	SFTPA1;ABCB11;LPIN1
SHvsP	MGI_Mammalian_Phenotype_Level_4_2021	abnormal hair medulla MP:0003812	2/11	0.0135297	0.254091	13.3205	57.3161	FOXQ1;SOAT1
SHvsP	MGI_Mammalian_Phenotype_Level_4_2021	ascites MP:0005324	2/11	0.0135297	0.254091	13.3205	57.3161	PLVAP;ANGPT2
SHvsP	MGI_Mammalian_Phenotype_Level_4_2021	decreased bone trabecular spacing MP:0013631	2/11	0.0135297	0.254091	13.3205	57.3161	SNX10;ZNF467
SHvsP	MGI_Mammalian_Phenotype_Level_4_2021	decreased circulating adrenocorticotropin level MP:0002664	2/11	0.0135297	0.254091	13.3205	57.3161	NTRK2;LIF
SHvsP	MGI_Mammalian_Phenotype_Level_4_2021	lymphedema MP:0003390	2/11	0.0135297	0.254091	13.3205	57.3161	CDH5;FLT4
SHvsP	MGI_Mammalian_Phenotype_Level_4_2021	increased susceptibility to endotoxin shock MP:0008735	4/56	0.0136381	0.254091	4.62907	19.8814	IL10;LIF;TREM2;USP18
SHvsP	MGI_Mammalian_Phenotype_Level_4_2021	decreased CD8-positive, alpha-beta T cell number MP:0008079	7/153	0.0136909	0.254091	2.89809	12.4358	CCR1;PSMB11;IL15;LCK;NDST3;NPY1R;PAX1
SHvsP	MGI_Mammalian_Phenotype_Level_4_2021	increased compact bone thickness MP:0004148	3/31	0.0142191	0.256988	6.43578	27.3724	NPFFR2;THBS2;ZNF467
SHvsP	MGI_Mammalian_Phenotype_Level_4_2021	reduced long term potentiation MP:0001473	6/120	0.0146772	0.256988	3.17674	13.4105	SLC24A2;NTRK2;GRIN2A;TNC;GRIK3;KALRN
SHvsP	MGI_Mammalian_Phenotype_Level_4_2021	decreased body size MP:0001265	22/805	0.0147078	0.256988	1.72295	7.26978	NFE2;PDGFRA;NTRK2;GABRB1;LPAR1;LIF;ADAM22;CHRD;CELF4;SNX10;KALRN;PAX1;TMEFF2;PCLO;ATCAY;THPO;NTF3;ZNF467;LPIN1;DUOX2;LHX9;STRA6
SHvsP	MGI_Mammalian_Phenotype_Level_4_2021	enhanced long term potentiation MP:0003008	4/58	0.0153574	0.256988	4.45717	18.6139	GAL;RGS14;PDE4B;CHRD
SHvsP	MGI_Mammalian_Phenotype_Level_4_2021	abnormal trigeminal ganglion morphology MP:0001092	3/32	0.0155021	0.256988	6.21354	25.8905	RDH10;CHRD;KDR
SHvsP	MGI_Mammalian_Phenotype_Level_4_2021	ovary cysts MP:0002016	3/32	0.0155021	0.256988	6.21354	25.8905	CDH5;HOXA5;BMP15
SHvsP	MGI_Mammalian_Phenotype_Level_4_2021	polysyndactyly MP:0004083	2/12	0.0160603	0.256988	11.9878	49.5264	SFRP2;PAX1
SHvsP	MGI_Mammalian_Phenotype_Level_4_2021	abnormal extraembryonic mesoderm development MP:0006323	2/12	0.0160603	0.256988	11.9878	49.5264	FOXF1;KDR
SHvsP	MGI_Mammalian_Phenotype_Level_4_2021	abnormal large intestine morphology MP:0000489	2/12	0.0160603	0.256988	11.9878	49.5264	IL10;SLC5A1
SHvsP	MGI_Mammalian_Phenotype_Level_4_2021	abnormal myotome development MP:0000737	2/12	0.0160603	0.256988	11.9878	49.5264	PDGFRA;PAX1
SHvsP	MGI_Mammalian_Phenotype_Level_4_2021	abnormal white fat cell morphology MP:0009117	2/12	0.0160603	0.256988	11.9878	49.5264	LIPE;CRHR2
SHvsP	MGI_Mammalian_Phenotype_Level_4_2021	decreased spleen red pulp amount MP:0008477	2/12	0.0160603	0.256988	11.9878	49.5264	IL10;LYN
SHvsP	MGI_Mammalian_Phenotype_Level_4_2021	impaired neutrophil phagocytosis MP:0002467	2/12	0.0160603	0.256988	11.9878	49.5264	PLAUR;PADI4
SHvsP	MGI_Mammalian_Phenotype_Level_4_2021	loss of cortex neurons MP:0003241	2/12	0.0160603	0.256988	11.9878	49.5264	PLAUR;FGF2
SHvsP	MGI_Mammalian_Phenotype_Level_4_2021	abnormal cerebral cortex morphology MP:0000788	7/158	0.0160804	0.256988	2.80141	11.5702	NTRK2;RDH10;PLAUR;RAB39B;NEFL;FGF2;USP18
SHvsP	MGI_Mammalian_Phenotype_Level_4_2021	abnormal lymphatic vessel morphology MP:0001879	3/33	0.0168482	0.266788	6.00612	24.5261	CDH5;ANGPT2;FLT4
SHvsP	MGI_Mammalian_Phenotype_Level_4_2021	abnormal CD8-positive, alpha beta T cell morphology MP:0005010	3/34	0.0182576	0.276026	5.81207	23.2667	PSMB11;LCK;CCR5
SHvsP	MGI_Mammalian_Phenotype_Level_4_2021	abnormal cranial ganglia morphology MP:0001081	3/34	0.0182576	0.276026	5.81207	23.2667	RDH10;NTF3;CHRD
SHvsP	MGI_Mammalian_Phenotype_Level_4_2021	abnormal somatic nervous system morphology MP:0002752	2/13	0.0187757	0.276026	10.8975	43.3195	NTRK2;NTF3
SHvsP	MGI_Mammalian_Phenotype_Level_4_2021	abnormal vertebral arch development MP:0005226	2/13	0.0187757	0.276026	10.8975	43.3195	CHRD;PAX1
SHvsP	MGI_Mammalian_Phenotype_Level_4_2021	chylous ascites MP:0012080	2/13	0.0187757	0.276026	10.8975	43.3195	ANGPT2;FLT4
SHvsP	MGI_Mammalian_Phenotype_Level_4_2021	decreased circulating interferon-beta level MP:0008576	2/13	0.0187757	0.276026	10.8975	43.3195	DDX60;USP18
SHvsP	MGI_Mammalian_Phenotype_Level_4_2021	enlarged seminal vesicle MP:0002997	2/13	0.0187757	0.276026	10.8975	43.3195	GAL;MYOZ1
SHvsP	MGI_Mammalian_Phenotype_Level_4_2021	increased stomach pH MP:0008006	2/13	0.0187757	0.276026	10.8975	43.3195	SNX10;GAST
SHvsP	MGI_Mammalian_Phenotype_Level_4_2021	abnormal neutrophil physiology MP:0002463	5/93	0.0189561	0.276026	3.42343	13.576	CCR1;PLAUR;PADI4;EDIL3;S100A9
SHvsP	MGI_Mammalian_Phenotype_Level_4_2021	abnormal response to novel object MP:0003461	4/62	0.0191907	0.276026	4.14893	16.4021	NTRK2;RGS14;TNC;CHRD
SHvsP	MGI_Mammalian_Phenotype_Level_4_2021	absent vitelline blood vessels MP:0001719	4/62	0.0191907	0.276026	4.14893	16.4021	CDH5;MYOCD;FOXF1;KDR
SHvsP	MGI_Mammalian_Phenotype_Level_4_2021	abnormal blood vessel morphology MP:0001614	7/165	0.0199026	0.2839	2.67633	10.4829	MYOCD;FLT1;NTF3;LIF;TEK;THBS2;CRHR2
SHvsP	MGI_Mammalian_Phenotype_Level_4_2021	syndactyly MP:0000564	4/64	0.0213098	0.292194	4.01022	15.4337	SFRP2;RDH10;ADAMTS20;PAX1
SHvsP	MGI_Mammalian_Phenotype_Level_4_2021	abnormal miniature excitatory postsynaptic currents MP:0004753	5/96	0.0214325	0.292194	3.31006	12.72	GRIN2A;CELF4;CHRD;KALRN;GRIA3
SHvsP	MGI_Mammalian_Phenotype_Level_4_2021	small otic vesicle MP:0004310	2/14	0.0216691	0.292194	9.98882	38.2759	RDH10;CHRD
SHvsP	MGI_Mammalian_Phenotype_Level_4_2021	thick aortic valve cusps MP:0010593	2/14	0.0216691	0.292194	9.98882	38.2759	ADAMTS19;NTF3
SHvsP	MGI_Mammalian_Phenotype_Level_4_2021	abnormal glial cell morphology MP:0003634	2/14	0.0216691	0.292194	9.98882	38.2759	ADAM22;LIF
SHvsP	MGI_Mammalian_Phenotype_Level_4_2021	increased alcohol consumption MP:0003545	2/14	0.0216691	0.292194	9.98882	38.2759	NPY1R;CCR5
SHvsP	MGI_Mammalian_Phenotype_Level_4_2021	increased circulating interleukin-17 level MP:0008614	2/14	0.0216691	0.292194	9.98882	38.2759	IL10;LYN
SHvsP	MGI_Mammalian_Phenotype_Level_4_2021	abnormal lipid homeostasis MP:0002118	6/132	0.0223798	0.29455	2.87243	10.9141	LIPE;SOAT1;SLC10A2;NMU;LPIN1;FGF21
SHvsP	MGI_Mammalian_Phenotype_Level_4_2021	abnormal gluconeogenesis MP:0003383	3/37	0.0228677	0.29455	5.29843	20.0176	STEAP4;LPIN1;FGF21
SHvsP	MGI_Mammalian_Phenotype_Level_4_2021	abnormal intestine physiology MP:0010155	3/37	0.0228677	0.29455	5.29843	20.0176	IL10;PLVAP;SLC5A1
SHvsP	MGI_Mammalian_Phenotype_Level_4_2021	embryo tissue necrosis MP:0013241	3/37	0.0228677	0.29455	5.29843	20.0176	RDH10;KDR;TEK
SHvsP	MGI_Mammalian_Phenotype_Level_4_2021	impaired macrophage chemotaxis MP:0003799	3/37	0.0228677	0.29455	5.29843	20.0176	FLT1;MMP7;CCR5
SHvsP	MGI_Mammalian_Phenotype_Level_4_2021	increased trabecular bone thickness MP:0009347	3/37	0.0228677	0.29455	5.29843	20.0176	NPFFR2;SNX10;ZNF467
SHvsP	MGI_Mammalian_Phenotype_Level_4_2021	lung inflammation MP:0001861	6/134	0.023885	0.305375	2.82726	10.5584	CCR1;GPRC5A;FOXF1;SFTPA1;HOXA5;ATF3
SHvsP	MGI_Mammalian_Phenotype_Level_4_2021	abnormal bile salt level MP:0004774	2/15	0.0247338	0.307127	9.21998	34.1101	SLC10A2;ABCB11
SHvsP	MGI_Mammalian_Phenotype_Level_4_2021	abnormal level of surface class II molecules MP:0005042	2/15	0.0247338	0.307127	9.21998	34.1101	IL10;LYN
SHvsP	MGI_Mammalian_Phenotype_Level_4_2021	abnormal protein level MP:0008469	2/15	0.0247338	0.307127	9.21998	34.1101	IL10;STRA6
SHvsP	MGI_Mammalian_Phenotype_Level_4_2021	absent suckling reflex MP:0001435	2/15	0.0247338	0.307127	9.21998	34.1101	NTRK2;CLCF1
SHvsP	MGI_Mammalian_Phenotype_Level_4_2021	impaired exercise endurance MP:0012106	3/39	0.0262598	0.323745	5.00357	18.2116	IL10;CCR5;APLN
SHvsP	MGI_Mammalian_Phenotype_Level_4_2021	abnormal digit development MP:0006280	2/16	0.0279637	0.332864	8.56098	30.6213	SFRP2;RDH10
SHvsP	MGI_Mammalian_Phenotype_Level_4_2021	abnormal serotonin level MP:0005322	2/16	0.0279637	0.332864	8.56098	30.6213	LPAR1;TNC
SHvsP	MGI_Mammalian_Phenotype_Level_4_2021	decreased bronchoconstrictive response MP:0012125	2/16	0.0279637	0.332864	8.56098	30.6213	PNCK;THPO
SHvsP	MGI_Mammalian_Phenotype_Level_4_2021	decreased skeletal muscle glycogen level MP:0010399	2/16	0.0279637	0.332864	8.56098	30.6213	LIPE;CCR5
SHvsP	MGI_Mammalian_Phenotype_Level_4_2021	increased intestinal adenocarcinoma incidence MP:0002957	2/16	0.0279637	0.332864	8.56098	30.6213	IL10;DCC
SHvsP	MGI_Mammalian_Phenotype_Level_4_2021	abnormal inflammatory response MP:0001845	4/70	0.0285015	0.336943	3.64454	12.9665	IL10;LYN;NPY1R;SFTPA1
SHvsP	MGI_Mammalian_Phenotype_Level_4_2021	abnormal angiogenesis MP:0000260	4/71	0.0298239	0.343301	3.58996	12.6096	CDH5;ANGPT2;TEK;THBS2
SHvsP	MGI_Mammalian_Phenotype_Level_4_2021	palatal shelves fail to meet at midline MP:0009888	3/41	0.029906	0.343301	4.73974	16.635	PDGFRA;FOXE1;CHRD
SHvsP	MGI_Mammalian_Phenotype_Level_4_2021	obese MP:0001261	4/72	0.031182	0.343301	3.53699	12.266	NPY5R;GPR12;NMU;NPY1R
SHvsP	MGI_Mammalian_Phenotype_Level_4_2021	improved glucose tolerance MP:0005292	10/306	0.0312905	0.343301	2.0454	7.08616	LRRN3;THPO;AHSG;ADAM23;USH1C;GAST;SLC5A1;ZNF467;STRA6;SHANK1
SHvsP	MGI_Mammalian_Phenotype_Level_4_2021	small trigeminal ganglion MP:0001093	2/17	0.0313522	0.343301	7.98984	27.6646	NTRK2;NTF3
SHvsP	MGI_Mammalian_Phenotype_Level_4_2021	abnormal triglyceride level MP:0000187	2/17	0.0313522	0.343301	7.98984	27.6646	LIPE;LPIN1
SHvsP	MGI_Mammalian_Phenotype_Level_4_2021	abnormal visceral yolk sac blood island morphology MP:0011204	2/17	0.0313522	0.343301	7.98984	27.6646	CDH5;FLT1
SHvsP	MGI_Mammalian_Phenotype_Level_4_2021	decreased activity of thyroid gland MP:0003503	2/17	0.0313522	0.343301	7.98984	27.6646	THPO;DUOX2
SHvsP	MGI_Mammalian_Phenotype_Level_4_2021	decreased memory T cell number MP:0008050	2/17	0.0313522	0.343301	7.98984	27.6646	PSMB11;IL15
SHvsP	MGI_Mammalian_Phenotype_Level_4_2021	increased circulating interleukin-12 level MP:0008617	2/17	0.0313522	0.343301	7.98984	27.6646	IL10;LYN
SHvsP	MGI_Mammalian_Phenotype_Level_4_2021	increased thymus weight MP:0004955	2/17	0.0313522	0.343301	7.98984	27.6646	IL10;DUSP13
SHvsP	MGI_Mammalian_Phenotype_Level_4_2021	increased anxiety-related response MP:0001363	8/222	0.0314838	0.343301	2.25878	7.8115	RBPJL;PENK;TNC;PLAUR;GAD2;PROX2;CRHR2;SHANK1
SHvsP	MGI_Mammalian_Phenotype_Level_4_2021	abnormal thoracic vertebrae morphology MP:0003047	3/42	0.031824	0.343301	4.61797	15.9206	PDGFRA;CHRD;PAX1
SHvsP	MGI_Mammalian_Phenotype_Level_4_2021	impaired neutrophil recruitment MP:0008719	3/42	0.031824	0.343301	4.61797	15.9206	CCR1;CDH5;PDE4B
SHvsP	MGI_Mammalian_Phenotype_Level_4_2021	decreased circulating triglyceride level MP:0002644	9/267	0.0337469	0.361784	2.10954	7.14895	SGSM1;LIPE;AHSG;BTBD16;LIF;USH1C;ABCB11;DUOX2;CRHR2
SHvsP	MGI_Mammalian_Phenotype_Level_4_2021	increased susceptibility to parasitic infection MP:0005027	4/74	0.0340059	0.36231	3.43558	11.6165	IL10;CCR1;IL15;MUC5AC
SHvsP	MGI_Mammalian_Phenotype_Level_4_2021	sternebra fusion MP:0010082	2/18	0.0348935	0.363889	7.49009	25.1327	HOXA5;PAX1
SHvsP	MGI_Mammalian_Phenotype_Level_4_2021	increased susceptibility to neuronal excitotoxicity MP:0008235	2/18	0.0348935	0.363889	7.49009	25.1327	IL10;GAL
SHvsP	MGI_Mammalian_Phenotype_Level_4_2021	small spleen MP:0000692	6/147	0.0353319	0.363889	2.56488	8.57431	COLEC12;KCNT1;THPO;EYA2;NPY1R;DUOX2
SHvsP	MGI_Mammalian_Phenotype_Level_4_2021	skin edema MP:0001786	3/44	0.0358483	0.363889	4.39226	14.6195	PDGFRA;PLVAP;ANGPT2
SHvsP	MGI_Mammalian_Phenotype_Level_4_2021	abnormal stomach morphology MP:0000470	3/44	0.0358483	0.363889	4.39226	14.6195	PDGFRA;RDH10;SNX10
SHvsP	MGI_Mammalian_Phenotype_Level_4_2021	abnormal neuron differentiation MP:0009937	5/111	0.0369305	0.363889	2.83948	9.36664	NTRK2;SFRP2;NPY1R;PDE4B;FGF2
SHvsP	MGI_Mammalian_Phenotype_Level_4_2021	abnormal cholesterol homeostasis MP:0005278	4/76	0.036974	0.363889	3.33981	11.0132	LIPE;SOAT1;GPR12;LPIN1
SHvsP	MGI_Mammalian_Phenotype_Level_4_2021	increased circulating triglyceride level MP:0001552	7/189	0.0377326	0.363889	2.32055	7.60499	LIPE;PLVAP;NFASC;STEAP4;PADI4;LPIN1;FGF21
SHvsP	MGI_Mammalian_Phenotype_Level_4_2021	abnormal lymphocyte morphology MP:0002619	3/45	0.037954	0.363889	4.28746	14.0259	IL15;LCK;USP18
SHvsP	MGI_Mammalian_Phenotype_Level_4_2021	abnormal metabolism MP:0005266	3/45	0.037954	0.363889	4.28746	14.0259	LIPE;STEAP4;LPIN1
SHvsP	MGI_Mammalian_Phenotype_Level_4_2021	increased interleukin-4 secretion MP:0008699	3/45	0.037954	0.363889	4.28746	14.0259	CCR5;SAMSN1;ATF3
SHvsP	MGI_Mammalian_Phenotype_Level_4_2021	irregular heartbeat MP:0001636	3/45	0.037954	0.363889	4.28746	14.0259	CDH5;JPH2;GJA5
SHvsP	MGI_Mammalian_Phenotype_Level_4_2021	abnormal enterocyte morphology MP:0000479	2/19	0.0385816	0.363889	7.04914	22.9448	IL10;USH1C
SHvsP	MGI_Mammalian_Phenotype_Level_4_2021	abnormal gastric chief cell morphology MP:0004140	2/19	0.0385816	0.363889	7.04914	22.9448	SNX10;GAST
SHvsP	MGI_Mammalian_Phenotype_Level_4_2021	abnormal surfactant secretion MP:0004780	2/19	0.0385816	0.363889	7.04914	22.9448	FOXF1;HOXA5
SHvsP	MGI_Mammalian_Phenotype_Level_4_2021	decreased airway responsiveness MP:0002335	2/19	0.0385816	0.363889	7.04914	22.9448	CCR1;IL10
SHvsP	MGI_Mammalian_Phenotype_Level_4_2021	decreased muscle cell glucose uptake MP:0030022	2/19	0.0385816	0.363889	7.04914	22.9448	LIPE;STEAP4
SHvsP	MGI_Mammalian_Phenotype_Level_4_2021	decreased vasoconstriction MP:0003026	2/19	0.0385816	0.363889	7.04914	22.9448	IL10;FGF2
SHvsP	MGI_Mammalian_Phenotype_Level_4_2021	facial cleft MP:0008797	2/19	0.0385816	0.363889	7.04914	22.9448	RDH10;SHROOM3
SHvsP	MGI_Mammalian_Phenotype_Level_4_2021	increased length of allograft survival MP:0004751	2/19	0.0385816	0.363889	7.04914	22.9448	CCR1;CCR5
SHvsP	MGI_Mammalian_Phenotype_Level_4_2021	increased susceptibility to Coronaviridae infection MP:0020949	2/19	0.0385816	0.363889	7.04914	22.9448	CCR1;CCR5
SHvsP	MGI_Mammalian_Phenotype_Level_4_2021	pulmonary hypoplasia MP:0001178	3/46	0.0401215	0.371577	4.18754	13.4665	PDGFRA;FOXF1;RDH10
SHvsP	MGI_Mammalian_Phenotype_Level_4_2021	abnormal interleukin level MP:0008751	3/46	0.0401215	0.371577	4.18754	13.4665	IL10;TREM2;SFTPA1
SHvsP	MGI_Mammalian_Phenotype_Level_4_2021	increased circulating cholesterol level MP:0005178	8/234	0.0409261	0.371577	2.13753	6.8315	IL10;LIPE;PLVAP;SOAT1;GPR12;SLC10A2;NMU;FGF21
SHvsP	MGI_Mammalian_Phenotype_Level_4_2021	increased susceptibility to bacterial infection MP:0002412	7/193	0.0414776	0.371577	2.27018	7.22508	IL10;PLAUR;PADI4;SFTPA1;CCR5;USP18;CAMP
SHvsP	MGI_Mammalian_Phenotype_Level_4_2021	abnormal hair shaft morphology MP:0003809	3/47	0.0423504	0.371577	4.09216	12.9385	FOXQ1;FOXE1;SOAT1
SHvsP	MGI_Mammalian_Phenotype_Level_4_2021	hydrops fetalis MP:0002192	3/47	0.0423504	0.371577	4.09216	12.9385	PDGFRA;FLT4;CHRD
SHvsP	MGI_Mammalian_Phenotype_Level_4_2021	abnormal adipose tissue physiology MP:0005666	2/20	0.0424106	0.371577	6.65718	21.0391	LIPE;CRHR2
SHvsP	MGI_Mammalian_Phenotype_Level_4_2021	small dorsal root ganglion MP:0000964	2/20	0.0424106	0.371577	6.65718	21.0391	NTRK2;NTF3
SHvsP	MGI_Mammalian_Phenotype_Level_4_2021	abnormal induced retinal neovascularization MP:0009660	2/20	0.0424106	0.371577	6.65718	21.0391	MMP7;LIF
SHvsP	MGI_Mammalian_Phenotype_Level_4_2021	abnormal Kupffer cell morphology MP:0008114	2/20	0.0424106	0.371577	6.65718	21.0391	CCR1;CCR5
SHvsP	MGI_Mammalian_Phenotype_Level_4_2021	abnormal neutrophil morphology MP:0005065	2/20	0.0424106	0.371577	6.65718	21.0391	DCC;S100A9
SHvsP	MGI_Mammalian_Phenotype_Level_4_2021	decreased retroperitoneal fat pad weight MP:0009305	2/20	0.0424106	0.371577	6.65718	21.0391	NPFFR2;PLVAP
SHvsP	MGI_Mammalian_Phenotype_Level_4_2021	enlarged cecum MP:0009476	2/20	0.0424106	0.371577	6.65718	21.0391	PROX2;MYOZ1
SHvsP	MGI_Mammalian_Phenotype_Level_4_2021	increased trabecular bone mass MP:0010872	2/20	0.0424106	0.371577	6.65718	21.0391	NPFFR2;ZNF467
SHvsP	MGI_Mammalian_Phenotype_Level_4_2021	increased circulating free fatty acids level MP:0001554	4/80	0.0433439	0.377836	3.16338	9.92856	LIPE;NMU;NPY1R;FGF21
SHvsP	MGI_Mammalian_Phenotype_Level_4_2021	abnormal cervical vertebrae morphology MP:0003048	3/48	0.0446403	0.387182	4.00102	12.4396	PDGFRA;HOXA5;PAX1
SHvsP	MGI_Mammalian_Phenotype_Level_4_2021	abnormal adenohypophysis morphology MP:0004163	2/21	0.046375	0.388559	6.30648	19.3672	ATCAY;DUOX2
SHvsP	MGI_Mammalian_Phenotype_Level_4_2021	abnormal circulating chemokine level MP:0010209	2/21	0.046375	0.388559	6.30648	19.3672	CCR1;LYN
SHvsP	MGI_Mammalian_Phenotype_Level_4_2021	abnormal circulating enzyme level MP:0001570	2/21	0.046375	0.388559	6.30648	19.3672	IL10;USP18
SHvsP	MGI_Mammalian_Phenotype_Level_4_2021	abnormal scapula morphology MP:0000149	2/21	0.046375	0.388559	6.30648	19.3672	PDGFRA;PAX1
SHvsP	MGI_Mammalian_Phenotype_Level_4_2021	abnormal spike wave discharge MP:0008840	2/21	0.046375	0.388559	6.30648	19.3672	SLC10A4;CELF4
SHvsP	MGI_Mammalian_Phenotype_Level_4_2021	abnormal white adipose tissue morphology MP:0002970	2/21	0.046375	0.388559	6.30648	19.3672	LIPE;STEAP4
SHvsP	MGI_Mammalian_Phenotype_Level_4_2021	dual inferior vena cava MP:0011683	2/21	0.046375	0.388559	6.30648	19.3672	CELF4;FLVCR2
SHvsP	MGI_Mammalian_Phenotype_Level_4_2021	impaired adaptive thermogenesis MP:0011049	3/49	0.0469905	0.389931	3.91384	11.9678	IL10;NMU;FGF21
SHvsP	MGI_Mammalian_Phenotype_Level_4_2021	increased percent body fat/body weight MP:0005458	3/49	0.0469905	0.389931	3.91384	11.9678	GPR12;LRRN3;NPY1R
SHvsP	MGI_Mammalian_Phenotype_Level_4_2021	impaired hematopoiesis MP:0001606	3/50	0.0494006	0.407968	3.83037	11.521	CCR1;LYN;KDR
SHvsP	Jensen_TISSUES	Vasculature	11/121	5.3085e-06	0.00302585	6.13166	74.4764	CDH5;FLT1;ANGPT2;GJA5;ELN;FLT4;CA4;KDR;TEK;FGF2;APLN
SHvsP	Jensen_TISSUES	Adult	33/918	2.4179e-05	0.00689103	2.35844	25.0703	PTPRU;FLT1;IFNA1;ELN;FLT4;TNC;NTS;FGF2;CDH5;HOXA9;GRIN2A;THPO;GJA5;PENK;NTF3;CA4;KDR;MAN1C1;GAST;CCR5;CAMP;KCNH1;IL10;PDGFRA;NTRK2;ANGPT2;AHSG;IL15;LIF;GAD2;GAL;TEK;S100A8
SHvsP	Jensen_TISSUES	NAMALWA cell	4/13	4.62613e-05	0.00740357	26.8044	267.54	IFNA4;IFNA1;IFNA2;IFNA10
SHvsP	Jensen_TISSUES	Stromal cell	12/182	5.19549e-05	0.00740357	4.32852	42.7015	IL10;FLT1;MMP7;THPO;IL15;FLT4;TNC;KDR;LIF;PLAUR;CCR5;FGF2
SHvsP	Jensen_TISSUES	Vascular cell	6/43	7.02641e-05	0.00801011	9.82633	93.9716	CDH5;FLT1;ELN;KDR;TEK;FGF2
SHvsP	Jensen_TISSUES	DAUDI cell	5/28	8.53451e-05	0.00810779	13.1418	123.123	LYN;IFNA7;IFNA1;IFNA2;IFNA8
SHvsP	Jensen_TISSUES	HT-1197 cell	3/8	0.000234411	0.0190878	36.0826	301.594	IFNA6;UPK2;CHST4
SHvsP	Jensen_TISSUES	Chorioallantois	4/21	0.000348874	0.0248573	14.1848	112.922	ANGPT2;KDR;TEK;FGF2
SHvsP	Jensen_TISSUES	Schwann cell	6/75	0.00149299	0.0941728	5.2606	34.2306	NTRK2;NFASC;NTF3;MAL;FGF2;ATF3
SHvsP	Jensen_TISSUES	Gastric ulcer	3/15	0.00174797	0.0941728	15.0291	95.424	GAST;FGF2;S100A8
SHvsP	Jensen_TISSUES	Sciatic nerve	4/32	0.00181737	0.0941728	8.60736	54.3156	NTRK2;NTF3;FGF2;ATF3
SHvsP	Jensen_TISSUES	Submucosal gland	3/17	0.0025493	0.110486	12.8807	76.9229	SFTPA2;MUC4;MUC5AC
SHvsP	Jensen_TISSUES	Neointima	5/58	0.00265832	0.110486	5.69434	33.7678	MYOCD;ELN;TNC;KDR;FGF2
SHvsP	Jensen_TISSUES	HUVEC cell	7/113	0.00271368	0.110486	3.99988	23.6371	CDH5;FLT1;ANGPT2;KDR;PLAUR;TEK;FGF2
SHvsP	Jensen_TISSUES	Mesonephron	3/19	0.00354523	0.111056	11.2695	63.5842	CDH5;EMCN;KDR
SHvsP	Jensen_TISSUES	Endoderm	6/90	0.00375976	0.111056	4.3179	24.1086	FOXF1;KDR;CHRD;LIF;FGF2;PAX1
SHvsP	Jensen_TISSUES	Colorectum	4/39	0.00379771	0.111056	6.88344	38.3639	DCC;SLC10A2;PLAUR;GAST
SHvsP	Jensen_TISSUES	Peritubular contractile cell	2/6	0.00389668	0.111056	29.9787	166.31	SPATS1;MAGEB4
SHvsP	Jensen_TISSUES	Porcine aortic endothelial cell	2/6	0.00389668	0.111056	29.9787	166.31	FLT1;KDR
SHvsP	Jensen_TISSUES	Endocervix	2/6	0.00389668	0.111056	29.9787	166.31	MUC4;MUC5AC
SHvsP	Jensen_TISSUES	Fiber	11/263	0.0044673	0.121255	2.65709	14.3774	NTRK2;GAL;SGCA;NPHS1;ELN;PENK;NTF3;CA4;TNC;NTS;FGF2
SHvsP	Jensen_TISSUES	Mesenchymal stem cell	8/159	0.00497957	0.129016	3.21155	17.029	IL10;CDH5;MYOCD;ELN;NTF3;TNC;KDR;FGF2
SHvsP	Jensen_TISSUES	Diaphragm	2/8	0.00711659	0.160648	19.9837	98.8261	MLIP;PLVAP
SHvsP	Jensen_TISSUES	WISH cell	2/8	0.00711659	0.160648	19.9837	98.8261	IFNA7;IFNA6
SHvsP	Jensen_TISSUES	Myofibroblast	5/74	0.00755213	0.160648	4.37035	21.3532	MYOCD;ELN;TNC;FGF2;FBLN2
SHvsP	Jensen_TISSUES	BTO:0000449	3/25	0.0078231	0.160648	8.19349	39.744	NPFFR2;FOXF1;FETUB
SHvsP	Jensen_TISSUES	BTO:0000964	10/247	0.00817771	0.160648	2.56237	12.3156	COLEC12;GRIN2A;GPR12;PLCZ1;SLC5A1;SLC2A5;KCNK2;KCNH1;BMP15;ZAR1
SHvsP	Jensen_TISSUES	Immune system	28/1046	0.00827712	0.160648	1.69875	8.14424	FLT1;IFNA1;ELN;IFNA2;TNC;FGF2;KDR;CCR5;CAMP;DUOX2;CCR1;LYN;IL10;PDGFRA;CCL22;MMP7;RSAD2;IL15;IFNA17;LIF;PLAUR;GAD2;SOAT1;TEK;S100A9;ATF3;ADA;S100A8
SHvsP	Jensen_TISSUES	Gastric mucosa	4/49	0.00860353	0.160648	5.35106	25.4474	OLFML3;ELN;CRISP3;GAST
SHvsP	Jensen_TISSUES	Conjunctiva	4/49	0.00860353	0.160648	5.35106	25.4474	KRT4;IFNA2;MUC4;MUC5AC
SHvsP	Jensen_TISSUES	Vocal fold	3/26	0.00873699	0.160648	7.83686	37.1482	RIMS3;ELN;FGF2
SHvsP	Jensen_TISSUES	MDBK cell	2/9	0.00905067	0.161215	17.128	80.586	IFNA7;IFNA8
SHvsP	Jensen_TISSUES	Barrett's esophagus	3/27	0.00971083	0.165821	7.50994	34.8049	CIB4;GAST;MUC5AC
SHvsP	Jensen_TISSUES	Submucosa	4/51	0.00989108	0.165821	5.12283	23.6476	PDGFRA;GAL;GAST;MUC5AC
SHvsP	Jensen_TISSUES	Tendon	6/111	0.010276	0.167351	3.45062	15.7967	IL10;IL15;ELN;TNC;PADI4;FGF2
SHvsP	Jensen_TISSUES	Pterygium	2/10	0.0111908	0.177188	14.9863	67.3283	KRT4;FLVCR2
SHvsP	Jensen_TISSUES	Mesenchyme	10/264	0.0126443	0.188486	2.38878	10.4403	CDH5;PDGFRA;MYOCD;FLT1;FOXF1;ELN;TNC;TEK;FGF2;PAX1
SHvsP	Jensen_TISSUES	Embryoid body	4/55	0.0128265	0.188486	4.72008	20.5618	CDH5;KDR;LIF;FGF2
SHvsP	Jensen_TISSUES	Proventriculus	2/11	0.0135297	0.188486	13.3205	57.3161	GAST;NTS
SHvsP	Jensen_TISSUES	Sto	2/11	0.0135297	0.188486	13.3205	57.3161	LIF;FGF2
SHvsP	Jensen_TISSUES	Mesoderm	5/86	0.0139299	0.188486	3.72061	15.9008	SFRP2;KDR;CHRD;LIF;HOXA5
SHvsP	Jensen_TISSUES	Mast cell	7/154	0.014147	0.188486	2.87822	12.2562	IL10;PDGFRA;CCL22;NTS;FGF2;CAMP;CCL26
SHvsP	Jensen_TISSUES	Macrophage	3/31	0.0142191	0.188486	6.43578	27.3724	CCL22;SOAT1;EMILIN2
SHvsP	Jensen_TISSUES	Peripheral nerve	7/157	0.0155804	0.201837	2.82023	11.737	NTRK2;NFASC;GAL;NTF3;LIF;FGF2;ATF3
SHvsP	Jensen_TISSUES	Pheromone gland	2/12	0.0160603	0.203431	11.9878	49.5264	ZNF467;KCNH1
SHvsP	Jensen_TISSUES	Decidua	3/34	0.0182576	0.226235	5.81207	23.2667	FLT1;IL15;LIF
SHvsP	Jensen_TISSUES	Ganglion	11/323	0.0188682	0.228827	2.13948	8.49432	NTRK2;GRIN2A;GAL;PENK;NTF3;NPY1R;GAD2;NTS;FGF2;ATF3;CRHR2
SHvsP	Jensen_TISSUES	Enteroendocrine cell	3/35	0.0197306	0.230782	5.63016	22.1017	GAST;SLC5A1;NTS
SHvsP	Jensen_TISSUES	Synovia	4/63	0.0202331	0.230782	4.0784	15.9075	IL10;IL15;S100A12;PADI4
SHvsP	Jensen_TISSUES	Blastocyst	6/129	0.020244	0.230782	2.94294	11.4772	PLCZ1;LIF;SLC2A5;FGF2;BMP15;ZAR1
SHvsP	Jensen_TISSUES	Allantois	2/14	0.0216691	0.237526	9.98882	38.2759	FOXF1;KDR
SHvsP	Jensen_TISSUES	HOS cell	2/14	0.0216691	0.237526	9.98882	38.2759	CCR1;CCR5
SHvsP	Jensen_TISSUES	Metanephron	2/15	0.0247338	0.261079	9.21998	34.1101	ALDH8A1;TINAG
SHvsP	Jensen_TISSUES	Oligodendrocyte	2/15	0.0247338	0.261079	9.21998	34.1101	OPALIN;MAL
SHvsP	Jensen_TISSUES	Neural crest	6/138	0.0270958	0.275354	2.74102	9.89064	PDGFRA;NTF3;TNC;CHRD;FGF2;PAX1
SHvsP	Jensen_TISSUES	Gingiva	4/69	0.0272148	0.275354	3.7008	13.3377	IL10;JPH2;KRT4;CAMP
SHvsP	Jensen_TISSUES	Pulmonary vein	2/16	0.0279637	0.275354	8.56098	30.6213	FOXF1;GJA5
SHvsP	Jensen_TISSUES	Photoreceptor cell	3/40	0.0280512	0.275354	4.86809	17.3972	SLC24A2;MYO3B;NXNL2
SHvsP	Jensen_TISSUES	Autonomic nervous system	4/70	0.0285015	0.275354	3.64454	12.9665	GAL;NTF3;GAST;NTS
SHvsP	Jensen_TISSUES	Megakaryocyte cell line	2/17	0.0313522	0.283432	7.98984	27.6646	NFE2;THPO
SHvsP	Jensen_TISSUES	Np	2/17	0.0313522	0.283432	7.98984	27.6646	FOXF1;PAX1
SHvsP	Jensen_TISSUES	Stalk cell	2/17	0.0313522	0.283432	7.98984	27.6646	FLT4;LIF
SHvsP	Jensen_TISSUES	Blastomere	3/42	0.031824	0.283432	4.61797	15.9206	DPRX;CHRD;ZAR1
SHvsP	Jensen_TISSUES	Dental pulp	3/42	0.031824	0.283432	4.61797	15.9206	OMD;TNC;FGF2
SHvsP	Jensen_TISSUES	Myenteric plexus	3/43	0.0338048	0.291908	4.50229	15.25	GAL;GAST;NTS
SHvsP	Jensen_TISSUES	Yolk sac	3/43	0.0338048	0.291908	4.50229	15.25	CDH5;KDR;TEK
SHvsP	Jensen_TISSUES	Peritoneal exudate	2/18	0.0348935	0.291908	7.49009	25.1327	IL10;IFNA1
SHvsP	Jensen_TISSUES	Cement gland	2/18	0.0348935	0.291908	7.49009	25.1327	LRRC9;CHRD
SHvsP	Jensen_TISSUES	Osteosarcoma cell	3/44	0.0358483	0.291908	4.39226	14.6195	SERPINB3;SERPINB4;STC2
SHvsP	Jensen_TISSUES	Bone matrix	3/44	0.0358483	0.291908	4.39226	14.6195	AHSG;SUSD5;FGF2
SHvsP	Jensen_TISSUES	Granulation tissue	2/20	0.0424106	0.33575	6.65718	21.0391	TNC;FGF2
SHvsP	Jensen_TISSUES	Large intestine	2/20	0.0424106	0.33575	6.65718	21.0391	SLC10A2;GAST
