# Supplementary material for: Altered hair root gene expression profiles highlight calcium signaling and lipid metabolism pathways to be associated with curly hair initiation and maintenance in Mangalitza pigs
Source: Front Genet. 2023 Jun 7;14:1184015. doi: 10.3389/fgene.2023.1184015 (PMC10282778; doi:10.3389/fgene.2023.1184015)
Supplement: Supplementary file 6 [file Table6.XLSX]

## Sheet: Sheet1
Table S6 Common DEGs across five months. Each gene is presented with its p-value, p-value adjusted to false discovery rate (PFDR) and log2(FC) for each analysis and month.
Ensembl ID	GeneName	P-value March	PFDR March	Log2FC March	P-value June	PFDR June	Log2FC June	P-value August	PFDR August	Log2FC August	P-value September	PFDR September	Log2FC September	P-value December	PFDR December	Log2FC December
ENSSSCG00000005781	ENSSSCG00000005781	0	0	6.48292	0	0	4.71425	0	0	4.27355	0	0	4.56146	0	0	5.54469
ENSSSCG00000005193	TYRP1	2.67827e-38	8.35323e-38	5.93546	1.57692e-48	4.99599e-48	26.7357	1.48403e-212	4.78805e-212	-3.41391	0	0	-3.66797	7.40723e-218	2.65836e-217	28.3776
ENSSSCG00000049302	ENSSSCG00000049302	1.86326e-07	5.40565e-07	23.8191	5.75485e-37	1.79937e-36	25.9259	3.90084e-17	1.16548e-16	24.654	5.23646e-12	1.91414e-11	25.1507	1.4755e-07	4.54266e-07	23.7129
ENSSSCG00000040146	ENSSSCG00000040146	9.87499e-10	2.90025e-09	-3.81669	5.53688e-06	1.56894e-05	-6	1.88711e-10	5.51185e-10	-5.54432	4.04539e-15	1.49971e-14	-6	1.82533e-05	5.52186e-05	-3.80735
ENSSSCG00000011663	ENSSSCG00000011663	3.13647e-13	9.34413e-13	4.39232	8.12036e-17	2.43332e-16	3.08746	1.10494e-187	3.55839e-187	-5.46719	1.29687e-57	5.04157e-57	-2.23336	1.8054e-20	5.86347e-20	25.0505
ENSSSCG00000040382	ENSSSCG00000040382	3.04087e-05	8.66774e-05	21.9316	0.000163136	0.00045551	22.1795	5.95423e-11	1.74271e-10	23.1946	7.48906e-08	2.65601e-07	24.4234	0.000190306	0.000569873	22.632
ENSSSCG00000043242	ENSSSCG00000043242	8.98482e-28	2.76577e-27	4.57894	1.76547e-126	5.79882e-126	26.8829	4.66175e-180	1.50011e-179	5.51728	5.56461e-161	2.19245e-160	28.7872	1.87729e-68	6.4906e-68	7.28309
ENSSSCG00000012075	ENSSSCG00000012075	0.000164064	0.000464421	3.56071	6.12636e-22	1.86411e-21	4.22882	6.54232e-17	1.95362e-16	4.72247	5.30135e-22	2.00279e-21	25.8142	4.63739e-10	1.44948e-09	3.16993
ENSSSCG00000002969	ENSSSCG00000002969	7.88434e-13	2.34514e-12	2.81762	7.62833e-10	2.21845e-09	24.2714	4.11042e-06	1.17149e-05	23.5404	0.000315	0.0010642	3.29768	1.81179e-17	5.83622e-17	24.976
ENSSSCG00000003145	FUT2	0	0	5.97131	0	0	7.86805	0	0	5.25514	4.40619e-145	1.73443e-144	6.63783	3.60891e-64	1.24405e-63	2.10852
ENSSSCG00000042283	ENSSSCG00000042283	2.3088e-15	6.9265e-15	3.24793	1.87042e-05	5.27509e-05	22.5165	9.63808e-14	2.84993e-13	-2.00643	0.000438644	0.00147796	2.5025	8.36977e-06	2.54123e-05	3.90689
ENSSSCG00000003754	ENSSSCG00000003754	1.03066e-34	3.20151e-34	-5.04985	9.09468e-123	2.98522e-122	-5.48751	9.4909e-55	2.97081e-54	-4.31215	1.37447e-161	5.41583e-161	-8.79442	2.53171e-06	7.72097e-06	-4.58496
ENSSSCG00000014117	THBS4	1.18978e-13	3.54941e-13	2.95606	8.25506e-153	2.72579e-152	3.25824	3.75262e-46	1.16777e-45	2.9386	7.75395e-56	3.0124e-55	2.26083	3.81754e-21	1.24176e-20	4.7879
ENSSSCG00000045132	ENSSSCG00000045132	5.1318e-05	0.000145943	3.96347	6.20013e-05	0.000173968	22.8858	0.000266733	0.000748204	2.1375	8.47511e-08	3.00437e-07	4.82018	0.00764023	0.0223059	21.391
ENSSSCG00000042485	ENSSSCG00000042485	4.69192e-05	0.000133509	4.01792	6.20013e-05	0.000173968	22.632	0.000156388	0.000439589	2.02385	6.99294e-07	2.45685e-06	4.82018	0.00764023	0.0223059	21.391
ENSSSCG00000032423	SPOCK1	4.53552e-28	1.39669e-27	5.2891	1.58284e-99	5.16325e-99	5.59743	8.64638e-19	2.59357e-18	2.07382	1.47335e-48	5.70657e-48	3.81038	2.82067e-38	9.48238e-38	2.78905
ENSSSCG00000041032	ENSSSCG00000041032	1.56612e-11	4.63517e-11	24.1795	1.19832e-08	3.46214e-08	3.18982	1.77269e-12	5.21978e-12	3.83794	2.28892e-11	8.3381e-11	25.0609	4.42586e-07	1.358e-06	2.68182
ENSSSCG00000047595	ENSSSCG00000047595	7.82426e-10	2.2991e-09	23.9134	2.45879e-07	7.04348e-07	24.0813	1.30953e-05	3.71766e-05	3.16993	2.41541e-05	8.31744e-05	23.632	0.000104552	0.000313975	2.72792
ENSSSCG00000016256	SPHKAP	3.20352e-13	9.54338e-13	24.6757	6.20251e-56	1.97732e-55	25.6998	1.17733e-44	3.65902e-44	3.38247	1.19385e-37	4.59454e-37	3.80735	2.398e-46	8.13634e-46	26.7927
ENSSSCG00000014861	ENSSSCG00000014861	2.44309e-23	7.46647e-23	25.632	3.78907e-26	1.16384e-25	25.1214	7.25266e-35	2.23349e-34	4.30743	5.40161e-62	2.10261e-61	5.44087	2.74582e-43	9.28784e-43	26.1984
ENSSSCG00000014987	ENSSSCG00000014987	3.4742e-17	1.04758e-16	-2.13245	5.49783e-57	1.75395e-56	3.04731	1.7401e-120	5.5593e-120	3.36075	8.41274e-08	2.98237e-07	24.3578	4.2736e-226	1.53495e-225	-6.93256
ENSSSCG00000030921	ENSSSCG00000030921	0.0176843	0.0486674	21.417	1.57024e-09	4.56002e-09	22.976	0.000340638	0.00095424	3.23266	0.0049826	0.0163593	2.90689	0.00442615	0.0129829	2.35755
ENSSSCG00000035299	ENSSSCG00000035299	5.39465e-06	1.54769e-05	2.18057	5.37627e-18	1.61729e-17	24.1214	4.02954e-42	1.2498e-41	5.96809	5.22386e-65	2.03533e-64	27.5352	2.12634e-36	7.1292e-36	5.8392
ENSSSCG00000028670	ENSSSCG00000028670	1.7287e-99	5.54915e-99	3.37626	0	0	5.17412	2.82575e-116	9.02181e-116	4.80254	2.54765e-168	1.00406e-167	5.52225	1.91698e-114	6.76115e-114	3.32378
ENSSSCG00000026232	FAM184B	1.24722e-51	3.93193e-51	3.56343	9.46489e-143	3.11968e-142	2.62027	1.32069e-181	4.2506e-181	3.0674	1.99636e-147	7.85963e-147	4.52992	9.69498e-153	3.44965e-152	3.00617
ENSSSCG00000008854	CPE	1.02103e-301	3.33142e-301	6.01123	0	0	7.27659	0	0	6.8457	6.60864e-271	2.61089e-270	6.78398	1.44577e-207	5.1838e-207	5.53398
ENSSSCG00000008959	CXCL2	2.90649e-05	8.28716e-05	-2.152	1.72284e-258	5.75165e-258	6.76044	1.68989e-62	5.31063e-62	6.55459	0.000209511	0.000710185	23.7389	5.72321e-11	1.79728e-10	-3.28951
ENSSSCG00000032956	BMERB1	8.5473e-75	2.72579e-74	26.7103	8.3772e-95	2.72745e-94	7.13955	2.17258e-46	6.76177e-46	2.75702	1.06067e-34	4.07317e-34	2.45943	1.08301e-97	3.79708e-97	27.4995
ENSSSCG00000039053	ENSSSCG00000039053	1.12678e-15	3.38378e-15	4.1127	1.97269e-206	6.55936e-206	27.537	2.86561e-145	9.18783e-145	2.00679	8.41233e-124	3.3071e-123	5.14316	1.50911e-118	5.32997e-118	7.49586
ENSSSCG00000036379	ENSSSCG00000036379	1.92573e-10	5.67571e-10	3.63227	1.14094e-24	3.49304e-24	3.87036	3.30865e-12	9.73249e-12	3.848	9.41145e-23	3.5608e-22	5.91289	2.26591e-14	7.2238e-14	24.9088
ENSSSCG00000028691	SULT1C3	1.02371e-93	3.28215e-93	27.3118	4.22451e-150	1.39422e-149	7.79766	2.31641e-74	7.31678e-74	6.40429	9.14882e-55	3.55293e-54	4.86047	1.27451e-60	4.38381e-60	26.3951
ENSSSCG00000024293	TMEM178A	3.47768e-23	1.06248e-22	3.82375	9.85601e-70	3.17187e-69	2.36048	5.1252e-20	1.5417e-19	2.26637	1.24458e-19	4.67797e-19	2.2817	1.48192e-38	4.98462e-38	4.38658
ENSSSCG00000008568	ENSSSCG00000008568	9.34335e-50	2.9421e-49	4.75845	3.87344e-26	1.18974e-25	3.6865	3.68195e-29	1.12594e-28	2.88264	1.33091e-27	5.07218e-27	3.79442	4.42803e-37	1.48622e-36	3.98185
ENSSSCG00000031858	KCNJ10	0.000124923	0.00035408	22.8191	1.36954e-08	3.95493e-08	22.8858	9.27093e-09	2.68572e-08	23.654	2.72433e-11	9.9197e-11	25.5463	5.21682e-08	1.61086e-07	3.10852
ENSSSCG00000032692	ENSSSCG00000032692	8.87918e-39	2.77083e-38	5.72247	1.81304e-66	5.82436e-66	27.094	9.29217e-40	2.87584e-39	5.97499	6.44082e-31	2.46444e-30	26.8623	2.12634e-36	7.1292e-36	6.28077
ENSSSCG00000026211	NRN1	2.46998e-19	7.48574e-19	-8.20457	1.67003e-15	4.98229e-15	-25.3239	3.17919e-24	9.64509e-24	-5.75933	1.39079e-30	5.31945e-30	-5.70044	3.16501e-13	1.00458e-12	-7.45943
ENSSSCG00000001906	CYP1A1	6.85355e-25	2.10001e-24	-5.20235	1.79787e-19	5.43071e-19	-5.83289	1.65038e-23	5.00044e-23	-5.88671	1.47697e-19	5.55057e-19	-4.49185	5.04947e-15	1.61334e-14	-6.08746
ENSSSCG00000036398	ENSSSCG00000036398	1.16265e-206	3.77736e-206	5.87627	7.00779e-69	2.25408e-68	27.0296	3.61707e-206	1.16648e-205	8.2635	8.03982e-32	3.07915e-31	6.79766	1.27377e-209	4.56788e-209	7.15672
ENSSSCG00000000732	ENSSSCG00000000732	2.23477e-39	6.97876e-39	3.54844	9.00388e-10	2.61777e-09	2.45943	2.33843e-24	7.09602e-24	2.25802	2.09762e-42	8.09665e-42	4.2114	7.39519e-48	2.51335e-47	3.06878
ENSSSCG00000038326	ENSSSCG00000038326	4.82245e-17	1.45351e-16	-25.632	1.21539e-61	3.89098e-61	-27.3239	0.00166153	0.00461933	-23.1015	7.51194e-17	2.80155e-16	-25.019	6.73335e-08	2.07766e-07	-24.632
ENSSSCG00000045659	ENSSSCG00000045659	0.00291096	0.0081159	22.7389	0.00292884	0.00803934	22.3239	7.76333e-06	2.20873e-05	-2.51457	1.79503e-06	6.27577e-06	24.141	2.01323e-05	6.08795e-05	23.7389
ENSSSCG00000046869	ENSSSCG00000046869	5.79572e-06	1.6624e-05	-24.1015	1.24818e-20	3.7844e-20	-7.80735	1.7941e-07	5.15863e-07	-24.2535	5.1851e-07	1.8243e-06	-4.80735	3.00722e-13	9.54676e-13	-6.49185
ENSSSCG00000043217	ENSSSCG00000043217	7.62463e-10	2.24056e-09	-24.8385	5.07674e-14	1.50575e-13	-4.58496	6.12028e-12	1.79838e-11	-24.9316	6.01388e-11	2.18534e-10	-24.391	8.27172e-24	2.70919e-23	-26.2535
ENSSSCG00000026605	BPI	5.23341e-13	1.55774e-12	4.97269	5.06716e-35	1.5803e-34	5.13955	3.3332e-40	1.03196e-39	4.83794	1.76485e-46	6.82746e-46	3.64024	1.50949e-100	5.29838e-100	7.32643
ENSSSCG00000039677	ENSSSCG00000039677	0.0002532	0.00071528	22.5638	2.36667e-12	6.9696e-12	23.5463	7.67533e-05	0.000216418	2.51096	7.05205e-17	2.63039e-16	3.07146	5.27004e-10	1.64668e-09	23.7129
ENSSSCG00000032172	ENSSSCG00000032172	0.00873304	0.0241698	22.3101	0.00142285	0.00392204	22.019	1.06922e-304	3.46429e-304	-8.88162	4.16455e-192	1.64282e-191	5.05311	0.00665642	0.0194576	22.391
ENSSSCG00000017583	ENSSSCG00000017583	1.71566e-07	4.97854e-07	4.30743	4.95966e-09	1.4362e-08	2.40372	6.30836e-07	1.8077e-06	4.16993	0.00237119	0.00785031	2.33628	6.09633e-08	1.88168e-07	23.4234
ENSSSCG00000032343	CCL4	0.000652053	0.00183303	22.654	9.39451e-79	3.03693e-78	4.9629	1.73769e-27	5.29978e-27	25.7024	0.0101792	0.033111	23.141	6.03163e-07	1.84866e-06	-3.43296
ENSSSCG00000045348	ENSSSCG00000045348	2.6379e-13	7.86071e-13	4.74416	7.50733e-31	2.32612e-30	25.189	3.1962e-10	9.3264e-10	2.08558	3.14079e-09	1.12732e-08	2.45943	2.8297e-25	9.29722e-25	25.2714
ENSSSCG00000043756	ENSSSCG00000043756	5.2574e-32	1.62772e-31	2.61997	0	0	5.90288	3.76871e-252	1.21864e-251	6.15381	3.36234e-298	1.32886e-297	8.33054	1.35117e-267	4.86899e-267	6.34947
ENSSSCG00000046026	ENSSSCG00000046026	7.90996e-30	2.4424e-29	5.38543	2.22924e-45	7.0402e-45	26.8799	5.70839e-59	1.79124e-58	7.16591	5.57963e-22	2.10784e-21	26.3704	2.31622e-27	7.64398e-27	4.73245
ENSSSCG00000016726	ENSSSCG00000016726	9.4227e-11	2.78094e-10	23.895	2.27473e-08	6.56051e-08	23.2891	2.82855e-11	8.28958e-11	3.32193	1.49336e-15	5.54522e-15	3.73877	1.51367e-11	4.7673e-11	24.0609
ENSSSCG00000012833	ENSSSCG00000012833	2.42496e-14	7.25141e-14	24.9495	4.06026e-11	1.18883e-10	23.8623	3.19242e-13	9.42573e-13	24.4425	5.16075e-07	1.8158e-06	4.89482	1.08527e-08	3.36562e-08	24.141
ENSSSCG00000025253	ENSSSCG00000025253	3.88458e-12	1.15265e-11	24.4425	5.01739e-08	1.44399e-07	23.2891	7.61664e-11	2.22831e-10	24.391	1.39997e-05	4.83768e-05	23.5463	2.26591e-14	7.2238e-14	24.2353
ENSSSCG00000043846	ENSSSCG00000043846	8.46757e-29	2.61032e-28	25.4738	1.40908e-26	4.33136e-26	24.9428	1.34312e-18	4.02676e-18	24.976	1.20443e-08	4.30159e-08	24.341	3.08318e-29	1.02184e-28	25.17
ENSSSCG00000026430	ENSSSCG00000026430	0	0	10.7782	0	0	10.0515	0	0	9.45368	0	0	30.0127	0	0	30.1432
ENSSSCG00000026864	ENSSSCG00000026864	1.29044e-27	3.97146e-27	25.6153	9.22761e-33	2.86922e-32	25.0914	2.35162e-35	7.2454e-35	25.7234	5.63094e-16	2.09367e-15	24.9539	1.36364e-24	4.4733e-24	25.1312
ENSSSCG00000027046	ENSSSCG00000027046	0	0	9.6987	0	0	28.9902	0	0	9.6268	3.99324e-212	1.57589e-211	28.9344	0	0	29.13
ENSSSCG00000037509	EIF1AY	0	0	9.33851	0	0	28.8916	0	0	29.6921	1.29853e-237	5.12779e-237	29.0769	0	0	7.4381
ENSSSCG00000012178	ENSSSCG00000012178	0	0	8.72747	0	0	30.9768	0	0	7.87221	0	0	31.0242	0	0	7.6194
ENSSSCG00000012179	ENSSSCG00000012179	2.90362e-271	9.46569e-271	7.88325	4.36533e-223	1.45327e-222	28.1177	0	0	8.17493	6.10945e-138	2.404e-137	28.1519	1.81835e-170	6.48703e-170	27.9498
ENSSSCG00000033734	ENSSSCG00000033734	0	0	6.4861	0	0	30.374	0	0	7.99823	0	0	10.1286	0	0	6.25368
ENSSSCG00000032661	ENSSSCG00000032661	3.69268e-152	1.19395e-151	28.0285	1.38495e-172	4.58683e-172	27.7911	6.77716e-144	2.17242e-143	28.0222	1.81608e-120	7.13742e-120	28.044	1.25554e-147	4.46421e-147	27.5184
ENSSSCG00000032354	ENSSSCG00000032354	5.48652e-68	1.74481e-67	26.7312	2.22005e-96	7.23358e-96	26.8173	4.78046e-63	1.50268e-62	26.6811	3.69383e-40	1.42384e-39	26.4394	4.29636e-66	1.48278e-65	26.463
ENSSSCG00000049587	ENSSSCG00000049587	2.65062e-13	7.89851e-13	24.4298	4.35708e-10	1.26885e-09	23.6595	4.86491e-15	1.44442e-14	24.1946	2.55583e-06	8.91728e-06	23.5463	4.17225e-09	1.29708e-08	23.632
ENSSSCG00000038249	ENSSSCG00000038249	2.10452e-76	6.7149e-76	27.019	9.34844e-59	2.98668e-58	26.4032	4.60744e-72	1.45413e-71	27.0275	3.46983e-42	1.33914e-41	26.4823	4.37813e-50	1.49159e-49	26.1795
ENSSSCG00000047085	ENSSSCG00000047085	3.16242e-07	9.16058e-07	-24.391	3.51736e-08	1.01314e-07	-4.87447	5.81863e-09	1.68743e-08	-6.90688	5.38092e-08	1.91051e-07	-23.9316	1.44507e-10	4.52769e-10	-25.0609
ENSSSCG00000041231	ENSSSCG00000041231	6.3091e-21	1.91928e-20	2.24793	1.33469e-59	4.2662e-59	3.005	3.15434e-28	9.6325e-28	3.04439	3.5722e-20	1.34444e-19	3.25172	4.32399e-21	1.4063e-20	2.52356
ENSSSCG00000041985	ENSSSCG00000041985	6.00102e-16	1.80341e-15	3.3505	5.5637e-65	1.78508e-64	4.09381	1.23813e-25	3.76471e-25	4.36457	8.95841e-28	3.41477e-27	3.35755	1.54798e-26	5.09984e-26	3.7866
ENSSSCG00000037477	ENSSSCG00000037477	4.41641e-17	1.33123e-16	25.48	1.65907e-15	4.94976e-15	25.3662	7.91072e-20	2.37861e-19	25.3975	4.12949e-11	1.50204e-10	25.5898	2.48544e-12	7.8572e-12	5.19967
