# Supplementary material for: Altered hair root gene expression profiles highlight calcium signaling and lipid metabolism pathways to be associated with curly hair initiation and maintenance in Mangalitza pigs
Source: Front Genet. 2023 Jun 7;14:1184015. doi: 10.3389/fgene.2023.1184015 (PMC10282778; doi:10.3389/fgene.2023.1184015)
Supplement: Supplementary file 7 [file Table11.XLSX]

## Sheet: Module Purple
Table S11 List of genes in modules purple, sienna3 and cyan. Module purple has the strongest correlation with curly phenotype in CvsSt analysis. Modules sienna3 and cyan harbor CYP4F3 and TRPM2, respectively. Genes are presented with their association to the trait (gene significance; GS) and their correlation with module eigengene (module membership; MM). The genes with absolute GS >0.2 and absol…
Ensembl ID	Gene name	Module color	GS	GS p-value	MM	MM p-value
ENSSSCG00000000199	SPATS2	purple	0.53742	0.0176445	-0.69332	0.00099626
ENSSSCG00000000299	TESPA1	purple	0.384387	0.104185	-0.554116	0.0138247
ENSSSCG00000000411	NAB2	purple	-0.912222	5.34e-08	0.932341	6.26e-09
ENSSSCG00000000660	A2M	purple	-0.888933	3.64e-07	0.907356	8.31e-08
ENSSSCG00000000802	NELL2	purple	-0.582524	0.00886596	0.55732	0.0131739
ENSSSCG00000000902	NR2C1	purple	0.759305	0.000163024	-0.706518	0.000720942
ENSSSCG00000001056	RANBP9	purple	0.698588	0.000877355	-0.915257	4e-08
ENSSSCG00000001398	-	purple	0.82427	1.43e-05	-0.899964	1.55e-07
ENSSSCG00000001403	LTA	purple	-0.294633	0.220766	0.282718	0.240877
ENSSSCG00000001469	SLA-DMB	purple	0.813886	2.24e-05	-0.889334	3.53e-07
ENSSSCG00000001497	ZNF451	purple	0.766458	0.000129546	-0.922542	1.91e-08
ENSSSCG00000001523	GRM4	purple	-0.808667	2.78e-05	0.933638	5.34e-09
ENSSSCG00000001629	USP49	purple	0.74628	0.000243046	-0.814618	2.17e-05
ENSSSCG00000001660	PTK7	purple	-0.846139	4.99e-06	0.952391	3.38e-10
ENSSSCG00000001734	-	purple	-0.579298	0.00934306	0.6459	0.002814
ENSSSCG00000001868	TSPAN3	purple	0.743815	0.000261437	-0.94127	1.94e-09
ENSSSCG00000001914	LOXL1	purple	-0.778336	8.69e-05	0.924311	1.58e-08
ENSSSCG00000002388	ESRRB	purple	-0.553111	0.0140342	0.512058	0.0250046
ENSSSCG00000002424	SPATA7	purple	0.813556	2.27e-05	-0.911276	5.83e-08
ENSSSCG00000002600	-	purple	0.385452	0.103148	-0.355684	0.135041
ENSSSCG00000002639	-	purple	-0.787427	6.29e-05	0.874172	9.98e-07
ENSSSCG00000002891	-	purple	-0.433272	0.0638678	0.578925	0.00939949
ENSSSCG00000002957	GGN	purple	-0.374421	0.114256	0.367877	0.121237
ENSSSCG00000003131	SYNGR4	purple	-0.273535	0.257153	0.381778	0.106758
ENSSSCG00000003132	-	purple	0.58942	0.0079122	-0.688216	0.00112408
ENSSSCG00000003142	IZUMO1	purple	-0.286942	0.233618	0.313822	0.190737
ENSSSCG00000003253	-	purple	-0.677083	0.00145109	0.723472	0.000463649
ENSSSCG00000003266	TMC4	purple	0.473946	0.040368	-0.481485	0.0368653
ENSSSCG00000003302	-	purple	-0.475497	0.0396272	0.563712	0.0119492
ENSSSCG00000003472	ARHGEF19	purple	-0.653578	0.0024068	0.775622	9.54e-05
ENSSSCG00000003718	TAF4B	purple	0.696593	0.000920887	-0.754722	0.000188131
ENSSSCG00000003967	ZMYND12	purple	0.778926	8.51e-05	-0.736601	0.000322193
ENSSSCG00000004082	-	purple	-0.556529	0.0133324	0.626797	0.00407986
ENSSSCG00000004104	KATNA1	purple	0.704751	0.000753587	-0.853644	3.35e-06
ENSSSCG00000004109	ZC3H12D	purple	-0.290377	0.22782	0.436914	0.0614215
ENSSSCG00000004196	MED23	purple	0.642672	0.00300141	-0.861174	2.2e-06
ENSSSCG00000004317	UBE2J1	purple	0.922772	1.87e-08	-0.906314	9.1e-08
ENSSSCG00000004339	UFL1	purple	0.891842	2.93e-07	-0.897722	1.86e-07
ENSSSCG00000004342	NDUFAF4	purple	0.514839	0.0240961	-0.638049	0.00328774
ENSSSCG00000004452	PRSS35	purple	-0.334986	0.160935	0.361454	0.128378
ENSSSCG00000004478	MYO6	purple	0.803047	3.48e-05	-0.858165	2.61e-06
ENSSSCG00000004589	RNF111	purple	-0.779202	8.43e-05	0.713688	0.000600399
ENSSSCG00000004753	INO80	purple	0.4931	0.0319345	-0.598957	0.00673216
ENSSSCG00000004884	TMX3	purple	0.71743	0.000544548	-0.644299	0.00290572
ENSSSCG00000004942	TIPIN	purple	0.832623	9.72e-06	-0.908059	7.8e-08
ENSSSCG00000005029	RTRAF	purple	0.763293	0.000143555	-0.818619	1.83e-05
ENSSSCG00000005227	PUM3	purple	0.790147	5.7e-05	-0.886126	4.45e-07
ENSSSCG00000005318	CREB3	purple	0.801316	3.73e-05	-0.866231	1.63e-06
ENSSSCG00000005346	ZCCHC7	purple	0.774429	9.93e-05	-0.91128	5.83e-08
ENSSSCG00000005490	WHRN	purple	-0.809634	2.67e-05	0.909246	7.02e-08
ENSSSCG00000005589	NR6A1	purple	0.767355	0.000125795	-0.921205	2.2e-08
ENSSSCG00000005663	-	purple	-0.693481	0.000992433	0.857256	2.74e-06
ENSSSCG00000005786	SNRPA1	purple	0.796693	4.46e-05	-0.928055	1.04e-08
ENSSSCG00000005941	KHDRBS3	purple	-0.581921	0.00895354	0.698024	0.000889472
ENSSSCG00000006014	RAD21	purple	0.866395	1.62e-06	-0.970014	7.06e-12
ENSSSCG00000006261	TCEA1	purple	0.762139	0.000148974	-0.911055	5.95e-08
ENSSSCG00000006264	OPRK1	purple	-0.433311	0.0638414	0.467833	0.0433917
ENSSSCG00000006345	OLFML2B	purple	-0.734223	0.000344683	0.80822	2.83e-05
ENSSSCG00000006479	TTC24	purple	-0.193444	0.427488	0.410156	0.0811333
ENSSSCG00000006503	RXFP4	purple	0.446738	0.0551734	-0.508806	0.0261003
ENSSSCG00000006506	SYT11	purple	0.906597	8.88e-08	-0.941151	1.97e-09
ENSSSCG00000006564	-	purple	0.705578	0.000738147	-0.601925	0.00639575
ENSSSCG00000006572	NPR1	purple	-0.542971	0.0162916	0.574939	0.0100205
ENSSSCG00000006666	SV2A	purple	-0.494752	0.0312768	0.541447	0.0166544
ENSSSCG00000006750	SYCP1	purple	0.43466	0.062927	-0.525548	0.0208383
ENSSSCG00000006812	ALX3	purple	-0.402931	0.0871762	0.542073	0.0165047
ENSSSCG00000006858	OLFM3	purple	-0.446453	0.0553474	0.453404	0.051216
ENSSSCG00000006897	CCDC18	purple	0.709328	0.000671476	-0.772306	0.000106715
ENSSSCG00000006917	LRRC8C	purple	-0.787072	6.37e-05	0.713051	0.000610368
ENSSSCG00000006936	ODF2L	purple	-0.26252	0.277567	0.451227	0.0524836
ENSSSCG00000007074	TASP1	purple	0.755325	0.00018465	-0.874853	9.55e-07
ENSSSCG00000007145	ADAM33	purple	-0.149588	0.541049	0.363691	0.125858
ENSSSCG00000007481	ZFP64	purple	-0.874577	9.72e-07	0.882944	5.57e-07
ENSSSCG00000007488	DOK5	purple	-0.468738	0.0429335	0.526198	0.0206524
ENSSSCG00000007510	C20orf85	purple	-0.331665	0.165385	0.367099	0.122087
ENSSSCG00000007523	TUBB1	purple	-0.775821	9.47e-05	0.898159	1.8e-07
ENSSSCG00000007682	SH2B2	purple	-0.396241	0.0930589	0.351987	0.139436
ENSSSCG00000007703	TRIM50	purple	-0.519659	0.0225836	0.479102	0.0379462
ENSSSCG00000007757	TRIM72	purple	0.415317	0.0770099	-0.430496	0.065781
ENSSSCG00000007765	PRSS53	purple	-0.82103	1.65e-05	0.912839	5.04e-08
ENSSSCG00000007767	ZNF668	purple	-0.835542	8.46e-06	0.916699	3.48e-08
ENSSSCG00000007895	ZC3H7A	purple	0.7606	0.00015647	-0.923879	1.66e-08
ENSSSCG00000007899	-	purple	-0.726997	0.000421325	0.87175	1.16e-06
ENSSSCG00000007957	C16orf90	purple	0.353776	0.137297	-0.412601	0.0791605
ENSSSCG00000007985	PGAP6	purple	-0.456908	0.0492245	0.603956	0.00617343
ENSSSCG00000008006	FBXL16	purple	-0.508667	0.0261482	0.47727	0.0387934
ENSSSCG00000008098	POLR1B	purple	0.719472	0.000515966	-0.793248	5.08e-05
ENSSSCG00000008126	ASTL	purple	-0.507915	0.0264073	0.642368	0.00301959
ENSSSCG00000008157	IL18RAP	purple	0.385452	0.103148	-0.355684	0.135041
ENSSSCG00000008589	WDCP	purple	-0.663647	0.00194794	0.551828	0.0143049
ENSSSCG00000008668	RBAK	purple	0.403378	0.0867925	-0.622751	0.00440053
ENSSSCG00000008742	CD38	purple	-0.27549	0.253632	0.388728	0.100005
ENSSSCG00000008823	SLC10A4	purple	0.74807	0.000230384	-0.770881	0.000111935
ENSSSCG00000008882	-	purple	0.294747	0.220578	-0.308576	0.198659
ENSSSCG00000008937	AMBN	purple	-0.621541	0.00450035	0.456346	0.0495396
ENSSSCG00000009074	ABHD18	purple	0.458722	0.0482168	-0.537163	0.0177093
ENSSSCG00000009083	SPRY1	purple	0.759114	0.00016401	-0.884951	4.84e-07
ENSSSCG00000009102	-	purple	0.385452	0.103148	-0.355684	0.135041
ENSSSCG00000009188	STPG2	purple	0.650475	0.00256504	-0.617079	0.00488461
ENSSSCG00000009215	ABCG2	purple	-0.548269	0.0150785	0.578397	0.0094799
ENSSSCG00000009249	HNRNPD	purple	0.640772	0.00311647	-0.67209	0.00162164
ENSSSCG00000009356	-	purple	0.658789	0.00215928	-0.833962	9.13e-06
ENSSSCG00000009369	COG6	purple	0.82183	1.59e-05	-0.880781	6.45e-07
ENSSSCG00000009389	TRIM13	purple	0.830147	1.09e-05	-0.94418	1.27e-09
ENSSSCG00000009464	COMMD6	purple	0.554222	0.0138028	-0.493498	0.0317751
ENSSSCG00000009568	ZMYM5	purple	0.510214	0.0256213	-0.675864	0.00149128
ENSSSCG00000009605	GFRA2	purple	-0.636932	0.00336019	0.655909	0.0022933
ENSSSCG00000009612	DOK2	purple	-0.757873	0.000170543	0.894195	2.45e-07
ENSSSCG00000009818	IFT81	purple	0.828404	1.18e-05	-0.885091	4.79e-07
ENSSSCG00000009869	LHX5	purple	0.209217	0.390001	-0.157583	0.519381
ENSSSCG00000009956	GRK3	purple	-0.691813	0.00103268	0.769519	0.000117125
ENSSSCG00000009967	PITPNB	purple	0.833004	9.55e-06	-0.905483	9.78e-08
ENSSSCG00000010014	C5orf52	purple	-0.609963	0.00555284	0.565543	0.0116157
ENSSSCG00000010015	OSBP2	purple	-0.728268	0.000406885	0.721285	0.000491675
ENSSSCG00000010138	ZDHHC8	purple	-0.686202	0.00117817	0.782666	7.46e-05
ENSSSCG00000010158	TOMM20	purple	0.832019	1e-05	-0.960002	7.9e-11
ENSSSCG00000010166	NTPCR	purple	0.580597	0.0091485	-0.644742	0.00288009
ENSSSCG00000010460	RPP30	purple	0.848346	4.45e-06	-0.944469	1.22e-09
ENSSSCG00000010480	PDE6C	purple	0.496292	0.0306736	-0.527239	0.0203574
ENSSSCG00000010505	DNTT	purple	-0.660043	0.00210298	0.758549	0.000166958
ENSSSCG00000010702	PLEKHA1	purple	0.518773	0.0228558	-0.597944	0.00685029
ENSSSCG00000010768	CFAP46	purple	-0.693627	0.000988991	0.688138	0.00112613
ENSSSCG00000010892	KCNT2	purple	-0.512594	0.0248273	0.70158	0.000815288
ENSSSCG00000011038	MRC1	purple	0.608743	0.00567451	-0.684148	0.00123556
ENSSSCG00000011147	AKR1C2	purple	-0.488548	0.0338018	0.679105	0.00138642
ENSSSCG00000011454	SFMBT1	purple	0.555126	0.0136168	-0.712507	0.000618986
ENSSSCG00000011518	SHQ1	purple	0.739168	0.000299332	-0.881653	6.08e-07
ENSSSCG00000011618	GATA2	purple	-0.840852	6.52e-06	0.838339	7.39e-06
ENSSSCG00000011695	AGTR1	purple	-0.727177	0.000419247	0.680823	0.00133338
ENSSSCG00000011802	KNG1	purple	-0.81435	2.2e-05	0.905535	9.74e-08
ENSSSCG00000011822	OPA1	purple	0.696482	0.000923365	-0.705772	0.00073457
ENSSSCG00000012133	ASB11	purple	-0.521483	0.0220313	0.587721	0.00813902
ENSSSCG00000012171	PRDX4	purple	0.875705	9.04e-07	-0.955323	1.99e-10
ENSSSCG00000012512	ZMAT1	purple	0.774321	9.97e-05	-0.888215	3.83e-07
ENSSSCG00000012581	NXT2	purple	0.735104	0.000336204	-0.781919	7.66e-05
ENSSSCG00000012621	UBE2A	purple	0.7369	0.000319464	-0.90601	9.35e-08
ENSSSCG00000012741	MAMLD1	purple	-0.654745	0.00234941	0.882021	5.93e-07
ENSSSCG00000012773	PNCK	purple	-0.474187	0.0402522	0.417193	0.0755507
ENSSSCG00000012811	VBP1	purple	0.73299	0.000356851	-0.766254	0.000130414
ENSSSCG00000012912	TBC1D10C	purple	0.704517	0.000757995	-0.666958	0.001814
ENSSSCG00000013024	-	purple	-0.47403	0.0403276	0.605641	0.00599389
ENSSSCG00000013079	DAGLA	purple	-0.484126	0.0356959	0.551483	0.0143785
ENSSSCG00000013091		purple	-0.693281	0.000997194	0.653141	0.00242857
ENSSSCG00000013093	VWCE	purple	-0.802828	3.51e-05	0.728329	0.000406198
ENSSSCG00000013095	PAG6	purple	-0.37911	0.109435	0.537908	0.0175222
ENSSSCG00000013100	-	purple	-0.395267	0.0939389	0.543943	0.0160632
ENSSSCG00000013113	TMEM132A	purple	-0.762352	0.000147959	0.916937	3.4e-08
ENSSSCG00000013114	SLC15A3	purple	-0.50112	0.0288406	0.700908	0.00082889
ENSSSCG00000013155	-	purple	0.78076	7.98e-05	-0.90903	7.16e-08
ENSSSCG00000013236	MYBPC3	purple	0.400241	0.089508	-0.521945	0.0218929
ENSSSCG00000013498	EBI3	purple	0.252491	0.297001	-0.370369	0.118544
ENSSSCG00000013523	SAFB2	purple	-0.620109	0.0046208	0.485229	0.0352158
ENSSSCG00000013572	PNPLA6	purple	-0.402059	0.0879265	0.497777	0.0301004
ENSSSCG00000013888	JAK3	purple	-0.735691	0.000330652	0.747863	0.000231821
ENSSSCG00000013897	RAB3A	purple	-0.161937	0.507752	0.0485327	0.843591
ENSSSCG00000013928	GDF1	purple	-0.421181	0.0725159	0.328339	0.169926
ENSSSCG00000014068	UTP15	purple	0.775085	9.71e-05	-0.790696	5.58e-05
ENSSSCG00000014070	ANKRA2	purple	0.870282	1.27e-06	-0.94174	1.81e-09
ENSSSCG00000014110	DMGDH	purple	-0.418945	0.074206	0.578055	0.00953224
ENSSSCG00000014223	COMMD10	purple	0.705096	0.000747105	-0.633896	0.00356378
ENSSSCG00000014343	-	purple	0.811578	2.47e-05	-0.903018	1.21e-07
ENSSSCG00000014395	PCDH12	purple	-0.707347	0.000706039	0.644775	0.00287818
ENSSSCG00000014438	PDE6A	purple	-0.506625	0.0268564	0.556905	0.0132569
ENSSSCG00000014447	SLC6A7	purple	-0.810208	2.61e-05	0.857668	2.68e-06
ENSSSCG00000014854	KLHL35	purple	-0.810933	2.53e-05	0.879154	7.2e-07
ENSSSCG00000014950	VSTM5	purple	-0.677446	0.00143929	0.871725	1.16e-06
ENSSSCG00000015027	C11orf1	purple	0.720521	0.000501795	-0.924059	1.62e-08
ENSSSCG00000015073	TAGLN	purple	-0.71251	0.000618938	0.830206	1.09e-05
ENSSSCG00000015196	SIAE	purple	0.872586	1.1e-06	-0.87299	1.08e-06
ENSSSCG00000015197	SPA17	purple	0.847495	4.65e-06	-0.911351	5.79e-08
ENSSSCG00000015214	STT3A	purple	0.823007	1.51e-05	-0.922974	1.83e-08
ENSSSCG00000015223	DDX25	purple	0.664525	0.00191166	-0.679025	0.00138893
ENSSSCG00000015253	NTM	purple	-0.722658	0.000473909	0.749431	0.000221139
ENSSSCG00000015255	IGSF9B	purple	-0.56501	0.011712	0.574548	0.0100831
ENSSSCG00000015315	RBM48	purple	0.735739	0.000330197	-0.899992	1.55e-07
ENSSSCG00000015443	DLD	purple	0.861181	2.2e-06	-0.887246	4.11e-07
ENSSSCG00000015830	UNC5D	purple	-0.510248	0.0256098	0.621293	0.00452098
ENSSSCG00000016185	ARPC2	purple	0.768911	0.000119506	-0.943182	1.47e-09
ENSSSCG00000016256	SPHKAP	purple	-0.602871	0.00629141	0.654455	0.00236357
ENSSSCG00000016321	IQCA1	purple	-0.656909	0.002246	0.721779	0.000485219
ENSSSCG00000016381	SNED1	purple	-0.813415	2.28e-05	0.923631	1.7e-08
ENSSSCG00000016448	KCNH2	purple	-0.765726	0.00013268	0.917682	3.15e-08
ENSSSCG00000016489	WEE2	purple	0.352629	0.138666	-0.573026	0.0103299
ENSSSCG00000016711	-	purple	0.854761	3.15e-06	-0.913037	4.95e-08
ENSSSCG00000016934	ERCC8	purple	0.712403	0.000620649	-0.878967	7.29e-07
ENSSSCG00000017116	LPCAT1	purple	-0.652679	0.00245175	0.772196	0.000107107
ENSSSCG00000017189	GALR2	purple	-0.446439	0.0553559	0.418819	0.074302
ENSSSCG00000017215	SLC16A5	purple	-0.709147	0.000674572	0.887486	4.04e-07
ENSSSCG00000017219	HID1	purple	-0.889467	3.5e-07	0.978185	4.86e-13
ENSSSCG00000017220	OTOP3	purple	-0.661989	0.00201805	0.691041	0.00105175
ENSSSCG00000017272	HELZ	purple	0.644459	0.00289645	-0.809339	2.7e-05
ENSSSCG00000017313	-	purple	-0.828113	1.2e-05	0.795924	4.59e-05
ENSSSCG00000017379	ETV4	purple	0.574995	0.0100114	-0.551278	0.0144225
ENSSSCG00000017673	INTS2	purple	-0.579555	0.00930435	0.633744	0.00357429
ENSSSCG00000017783	-	purple	-0.664052	0.00193115	0.874354	9.86e-07
ENSSSCG00000017880	SPNS3	purple	-0.581517	0.0090127	0.686595	0.00116746
ENSSSCG00000017988	CCDC42	purple	0.591317	0.00766505	-0.54019	0.0169587
ENSSSCG00000018031	ZNF287	purple	0.413484	0.0784565	-0.595041	0.00719802
ENSSSCG00000018033	UBB	purple	0.617956	0.004807	-0.760016	0.000159397
ENSSSCG00000018619	5S_rRNA	purple	0.678384	0.0014092	-0.718725	0.000526271
ENSSSCG00000018746		purple	-0.623859	0.00431071	0.545285	0.0157525
ENSSSCG00000019012	ssc-mir-429	purple	-0.556757	0.0132865	0.596521	0.00701893
ENSSSCG00000019181		purple	-0.58493	0.00852316	0.590058	0.00782842
ENSSSCG00000019224	SNORD93	purple	-0.639965	0.00316643	0.5941	0.00731375
ENSSSCG00000020338	U6	purple	0.562063	0.0122559	-0.507079	0.0266978
ENSSSCG00000020673	-	purple	-0.732205	0.000364784	0.912161	5.37e-08
ENSSSCG00000020702	SENP6	purple	0.809574	2.68e-05	-0.911917	5.49e-08
ENSSSCG00000020938		purple	0.358912	0.131284	-0.564374	0.0118277
ENSSSCG00000020984	LXN	purple	0.851719	3.72e-06	-0.920447	2.38e-08
ENSSSCG00000021026	TMEM51	purple	-0.832809	9.64e-06	0.929627	8.67e-09
ENSSSCG00000021203	PIK3CB	purple	0.510968	0.0253676	-0.697967	0.000890724
ENSSSCG00000021205	STK26	purple	0.684269	0.0012321	-0.67293	0.00159181
ENSSSCG00000022031	CHST2	purple	-0.798119	4.22e-05	0.915804	3.79e-08
ENSSSCG00000022230	CD9	purple	0.436889	0.0614381	-0.553409	0.0139717
ENSSSCG00000022250	SPACA9	purple	0.644904	0.00287077	-0.652296	0.00247116
ENSSSCG00000022419	FEM1B	purple	0.74609	0.000244424	-0.678503	0.00140542
ENSSSCG00000022554	MATN1	purple	-0.692461	0.00101689	0.775848	9.46e-05
ENSSSCG00000022616	DCP1A	purple	0.775046	9.73e-05	-0.826367	1.3e-05
ENSSSCG00000022674	DAZAP2	purple	0.816728	1.98e-05	-0.93395	5.13e-09
ENSSSCG00000022988	TSPEAR	purple	-0.532624	0.0188842	0.669064	0.00173291
ENSSSCG00000023125	-	purple	-0.49838	0.0298701	0.642693	0.00300017
ENSSSCG00000023266	FOXJ3	purple	0.775137	9.7e-05	-0.896206	2.1e-07
ENSSSCG00000023307	FBXW11	purple	0.689184	0.00109886	-0.811558	2.47e-05
ENSSSCG00000023374	SRGN	purple	0.698457	0.000880167	-0.772738	0.000105174
ENSSSCG00000023445	AVL9	purple	0.458532	0.0483214	-0.619727	0.00465341
ENSSSCG00000023533	ZNF236	purple	0.460717	0.0471268	-0.486736	0.0345682
ENSSSCG00000023912	ORAI2	purple	-0.593087	0.00744011	0.528623	0.0199704
ENSSSCG00000024418	RHOU	purple	0.700664	0.000833886	-0.742344	0.000272962
ENSSSCG00000024419	RBBP8	purple	0.779831	8.25e-05	-0.894436	2.41e-07
ENSSSCG00000024474	-	purple	-0.731192	0.000375246	0.909701	6.73e-08
ENSSSCG00000024520	-	purple	-0.71836	0.000531381	0.672028	0.00162384
ENSSSCG00000024610	KRT4	purple	-0.699721	0.000853393	0.772448	0.000106206
ENSSSCG00000024837	SYT12	purple	-0.527849	0.0201861	0.67198	0.00162558
ENSSSCG00000024977	NOBOX	purple	-0.0614981	0.802509	0.0390526	0.873882
ENSSSCG00000025007	NFU1	purple	0.918687	2.85e-08	-0.916528	3.54e-08
ENSSSCG00000025295	NDFIP1	purple	0.706587	0.000719685	-0.857823	2.66e-06
ENSSSCG00000025514	RUFY3	purple	0.631056	0.00376342	-0.788754	5.99e-05
ENSSSCG00000025784	CDH4	purple	-0.662245	0.00200709	0.700202	0.000843396
ENSSSCG00000025793	-	purple	-0.746949	0.000238246	0.870182	1.28e-06
ENSSSCG00000025912	URI1	purple	0.878148	7.7e-07	-0.95965	8.5e-11
ENSSSCG00000026229	-	purple	-0.533755	0.018586	0.548569	0.0150122
ENSSSCG00000026349	ALDH3B2	purple	-0.397802	0.0916615	0.522119	0.0218412
ENSSSCG00000026382	PPP2R5E	purple	0.833745	9.22e-06	-0.870227	1.28e-06
ENSSSCG00000026451	U6	purple	-0.446952	0.0550426	0.483713	0.0358767
ENSSSCG00000026486	-	purple	-0.759233	0.000163395	0.748321	0.000228658
ENSSSCG00000026500	U6	purple	-0.707401	0.00070507	0.560908	0.0124747
ENSSSCG00000026527	HCN1	purple	-0.509048	0.0260176	0.502159	0.0284578
ENSSSCG00000026612	TIMM50	purple	-0.917432	3.23e-08	0.912311	5.3e-08
ENSSSCG00000026719	-	purple	0.632071	0.00369106	-0.59499	0.00720421
ENSSSCG00000026861	NECTIN4	purple	0.460554	0.0472147	-0.623172	0.00436621
ENSSSCG00000026924	KIFC2	purple	-0.779563	8.32e-05	0.916233	3.64e-08
ENSSSCG00000027211	EPC2	purple	0.90872	7.36e-08	-0.951411	4.01e-10
ENSSSCG00000027272	PIK3CG	purple	-0.329442	0.168412	0.428798	0.0669729
ENSSSCG00000027767	SHLD2	purple	-0.640091	0.00315862	0.537521	0.0176192
ENSSSCG00000027860	ERAP2	purple	0.749389	0.000221418	-0.859301	2.45e-06
ENSSSCG00000028117	CDK5RAP2	purple	0.705622	0.000737339	-0.588532	0.00803013
ENSSSCG00000028748	NDC1	purple	0.664089	0.0019296	-0.769582	0.00011688
ENSSSCG00000028768	-	purple	-0.805173	3.2e-05	0.930994	7.37e-09
ENSSSCG00000028784	-	purple	0.790828	5.55e-05	-0.79401	4.93e-05
ENSSSCG00000028855	GMPS	purple	0.829742	1.11e-05	-0.94915	5.86e-10
ENSSSCG00000028920	POLDIP2	purple	0.796099	4.56e-05	-0.924606	1.53e-08
ENSSSCG00000028962	-	purple	0.450907	0.0526723	-0.540154	0.0169676
ENSSSCG00000029038	-	purple	-0.774297	9.98e-05	0.932794	5.93e-09
ENSSSCG00000029189	DCHS1	purple	-0.749255	0.000222318	0.812979	2.33e-05
ENSSSCG00000029219	SH3BGR	purple	0.676231	0.00147906	-0.666878	0.00181718
ENSSSCG00000029380	ZFP2	purple	0.669633	0.0017115	-0.877656	7.95e-07
ENSSSCG00000029393	CENPJ	purple	-0.70915	0.000674517	0.705785	0.000734339
ENSSSCG00000029570	PXDN	purple	-0.700656	0.000834042	0.762583	0.000146866
ENSSSCG00000029954	THRAP3	purple	0.753367	0.000196155	-0.680469	0.00134416
ENSSSCG00000030002	C18orf21	purple	0.816223	2.03e-05	-0.926577	1.23e-08
ENSSSCG00000030032	-	purple	-0.525296	0.0209109	0.491041	0.0327688
ENSSSCG00000030102	-	purple	-0.625582	0.00417404	0.618329	0.00477433
ENSSSCG00000030112	MACROD2	purple	0.804154	3.33e-05	-0.920974	2.25e-08
ENSSSCG00000030147	TRMT61B	purple	0.438612	0.0603052	-0.601939	0.00639411
ENSSSCG00000030421	GDI1	purple	-0.710612	0.000649844	0.807207	2.95e-05
ENSSSCG00000030437	TMEM253	purple	-0.465684	0.0444949	0.470228	0.0421869
ENSSSCG00000030480	DYRK1A	purple	0.783816	7.16e-05	-0.840038	6.79e-06
ENSSSCG00000030487	LYSMD4	purple	0.708944	0.000678053	-0.885904	4.52e-07
ENSSSCG00000030733	-	purple	0.385452	0.103148	-0.355684	0.135041
ENSSSCG00000030947	ZFAT	purple	-0.410468	0.0808792	0.688809	0.00110857
ENSSSCG00000030991	-	purple	-0.872549	1.11e-06	0.901214	1.4e-07
ENSSSCG00000031329	ST8SIA1	purple	-0.8099	2.64e-05	0.846471	4.9e-06
ENSSSCG00000031374	-	purple	-0.647749	0.00271109	0.617807	0.00482008
ENSSSCG00000031469	-	purple	-0.631359	0.00374166	0.646609	0.00277417
ENSSSCG00000031572	MFF	purple	0.729369	0.000394717	-0.762268	0.000148359
ENSSSCG00000031694	DIRAS2	purple	-0.624635	0.00424871	0.590486	0.00777255
ENSSSCG00000031724	LYNX1	purple	-0.848995	4.3e-06	0.923187	1.78e-08
ENSSSCG00000031813	XKR4	purple	-0.530681	0.0194057	0.535844	0.0180447
ENSSSCG00000031868	XK	purple	0.491957	0.0323954	-0.749955	0.000217664
ENSSSCG00000031903	TNNT3	purple	-0.650154	0.00258189	0.673385	0.00157588
ENSSSCG00000031999	GPR18	purple	-0.684126	0.00123617	0.766034	0.000131352
ENSSSCG00000032059	-	purple	0.757138	0.000174513	-0.793771	4.98e-05
ENSSSCG00000032063	THEM6	purple	-0.425764	0.0691414	0.460885	0.0470356
ENSSSCG00000032249	GBX1	purple	-0.630149	0.00382902	0.677711	0.00143074
ENSSSCG00000032337	-	purple	-0.483475	0.0359815	0.462624	0.0461026
ENSSSCG00000032341	AIF1	purple	0.690888	0.00105556	-0.699274	0.000862783
ENSSSCG00000032532	CHRM2	purple	-0.706096	0.00072862	0.678194	0.00141526
ENSSSCG00000032731	NDST1	purple	-0.760191	0.000158514	0.903891	1.12e-07
ENSSSCG00000032734	VOPP1	purple	-0.715883	0.00056708	0.728968	0.000399113
ENSSSCG00000032902	KLK7	purple	-0.643073	0.00297759	0.75475	0.000187967
ENSSSCG00000032956	BMERB1	purple	-0.918734	2.84e-08	0.925659	1.36e-08
ENSSSCG00000033093	RGS6	purple	-0.539035	0.017242	0.578678	0.00943697
ENSSSCG00000033154	ARL6IP5	purple	0.743432	0.000264397	-0.931846	6.65e-09
ENSSSCG00000033180	PSMD10	purple	0.751429	0.000208142	-0.828914	1.16e-05
ENSSSCG00000033335	AKIP1	purple	-0.739408	0.000297271	0.759117	0.000163997
ENSSSCG00000033337	ARHGDIB	purple	0.642176	0.00303109	-0.722299	0.000478502
ENSSSCG00000033385	-	purple	-0.273423	0.257356	0.342164	0.151598
ENSSSCG00000033453	BST2	purple	0.596309	0.00704444	-0.593221	0.00742333
ENSSSCG00000033516	DHDDS	purple	0.667946	0.00177558	-0.703434	0.000778725
ENSSSCG00000033560	-	purple	0.718322	0.00053191	-0.856153	2.92e-06
ENSSSCG00000033608	LOXL2	purple	-0.76423	0.000139278	0.864896	1.77e-06
ENSSSCG00000033730	-	purple	0.562063	0.0122559	-0.507079	0.0266978
ENSSSCG00000033735	-	purple	-0.484669	0.035459	0.496323	0.0306617
ENSSSCG00000033809	-	purple	-0.789535	5.83e-05	0.882112	5.89e-07
ENSSSCG00000033830	CCDC8	purple	-0.774476	9.92e-05	0.869999	1.3e-06
ENSSSCG00000034069	-	purple	0.700206	0.000843307	-0.681596	0.00131007
ENSSSCG00000034165	DERPC	purple	0.827079	1.26e-05	-0.89282	2.72e-07
ENSSSCG00000034229	MIS18A	purple	0.588058	0.00809365	-0.564	0.0118962
ENSSSCG00000034230	-	purple	0.74839	0.000228187	-0.861213	2.19e-06
ENSSSCG00000034261	TMEM59	purple	0.770496	0.00011338	-0.911867	5.52e-08
ENSSSCG00000034502	H6PD	purple	-0.588473	0.00803804	0.711187	0.000640351
ENSSSCG00000034517	ZNF12	purple	0.746555	0.000241062	-0.897976	1.82e-07
ENSSSCG00000034711	-	purple	0.736461	0.000323488	-0.890996	3.12e-07
ENSSSCG00000034978	PNPLA7	purple	-0.554587	0.0137276	0.665214	0.00188358
ENSSSCG00000035256	-	purple	0.605858	0.00597111	-0.773528	0.000102406
ENSSSCG00000035377	-	purple	-0.528694	0.0199508	0.425112	0.0696142
ENSSSCG00000035428	-	purple	-0.619993	0.00463075	0.682408	0.00128597
ENSSSCG00000035876	ZNF599	purple	-0.522137	0.0218357	0.573148	0.0103099
ENSSSCG00000035887	C8orf34	purple	0.797776	4.28e-05	-0.884067	5.15e-07
ENSSSCG00000036056	DNAH17	purple	-0.417804	0.0750795	0.660657	0.00207588
ENSSSCG00000036060	RRAD	purple	-0.709535	0.00066795	0.637714	0.00330935
ENSSSCG00000036095	ACOT12	purple	-0.608324	0.00571681	0.467324	0.0436508
ENSSSCG00000036113	GSAP	purple	0.414077	0.0779866	-0.612223	0.00533297
ENSSSCG00000036180	-	purple	-0.714771	0.000583758	0.911023	5.97e-08
ENSSSCG00000036250	NMBR	purple	-0.313812	0.190751	0.337275	0.157915
ENSSSCG00000036307	OAF	purple	-0.70318	0.000783649	0.853777	3.33e-06
ENSSSCG00000036364	EGR4	purple	-0.727595	0.00041447	0.721018	0.000495191
ENSSSCG00000036383	LGALS3BP	purple	-0.55904	0.0128349	0.69062	0.00106228
ENSSSCG00000036676	MAIP1	purple	0.801413	3.71e-05	-0.85145	3.77e-06
ENSSSCG00000037347	-	purple	0.605913	0.0059653	-0.659082	0.002146
ENSSSCG00000037510	DYNLRB1	purple	0.694171	0.000976187	-0.884266	5.08e-07
ENSSSCG00000037539	SORCS2	purple	-0.782419	7.53e-05	0.917671	3.16e-08
ENSSSCG00000037608	LRRC70	purple	0.556262	0.0133861	-0.686761	0.00116296
ENSSSCG00000037630	SNORA73	purple	0.613644	0.00519843	-0.667462	0.00179434
ENSSSCG00000037690	-	purple	-0.500703	0.0289955	0.467699	0.0434596
ENSSSCG00000038097	ssc-mir-9824	purple	-0.637092	0.00334975	0.719671	0.000513261
ENSSSCG00000038132	IRF2BP2	purple	0.68604	0.00118262	-0.614507	0.00511808
ENSSSCG00000038202	-	purple	-0.559858	0.0126762	0.782096	7.62e-05
ENSSSCG00000038374	CIART	purple	0.776389	9.29e-05	-0.914016	4.51e-08
ENSSSCG00000038515	-	purple	-0.751707	0.000206387	0.699056	0.000867392
ENSSSCG00000038763	CERK	purple	-0.760729	0.000155829	0.928477	9.91e-09
ENSSSCG00000038797	-	purple	0.553701	0.0139109	-0.470053	0.0422743
ENSSSCG00000038827	-	purple	-0.229182	0.345268	0.462886	0.0459632
ENSSSCG00000038895	DCTN6	purple	0.394668	0.0944832	-0.6349	0.00349535
ENSSSCG00000038932	PPM1E	purple	0.724435	0.000451737	-0.676475	0.00147101
ENSSSCG00000039063	ssc-mir-9840	purple	0.453979	0.0508847	-0.39223	0.0967219
ENSSSCG00000039185	EPB41L5	purple	0.699232	0.000863658	-0.633987	0.00355758
ENSSSCG00000039317	SLC25A21	purple	0.668309	0.00176162	-0.482636	0.0363521
ENSSSCG00000039345	FATE1	purple	-0.677229	0.00144634	0.718092	0.000535143
ENSSSCG00000039351	PIGH	purple	0.482439	0.0364396	-0.673988	0.00155494
ENSSSCG00000039446	-	purple	-0.434495	0.0630384	0.501336	0.0287609
ENSSSCG00000039555	JOSD1	purple	0.619068	0.00471007	-0.780728	7.99e-05
ENSSSCG00000039591	SERINC3	purple	0.522433	0.0217478	-0.691538	0.00103944
ENSSSCG00000039592	ZMYND19	purple	-0.391387	0.097505	0.47394	0.0403708
ENSSSCG00000039677	CHRNA4	purple	-0.611202	0.00543134	0.611299	0.00542196
ENSSSCG00000039784	-	purple	-0.74924	0.000222419	0.9303	8.01e-09
ENSSSCG00000039836	-	purple	-0.771307	0.000110349	0.909392	6.93e-08
ENSSSCG00000039883	-	purple	0.678366	0.00140977	-0.765025	0.000135736
ENSSSCG00000039983	GJA4	purple	-0.510232	0.0256152	0.425107	0.0696176
ENSSSCG00000040022	ERICH4	purple	-0.376755	0.111838	0.540734	0.0168264
ENSSSCG00000040134	TNFRSF13B	purple	-0.8298	1.11e-05	0.843875	5.6e-06
ENSSSCG00000040278	IFITM5	purple	-0.364547	0.124904	0.360535	0.129423
ENSSSCG00000040461	CDKN1C	purple	-0.515098	0.0240131	0.582891	0.00881303
ENSSSCG00000040554	COL9A3	purple	-0.51054	0.0255116	0.564274	0.011846
ENSSSCG00000040594	C3orf20	purple	0.35469	0.136214	-0.494367	0.0314291
ENSSSCG00000040674	-	purple	-0.576695	0.00974291	0.513136	0.0246493
ENSSSCG00000040875	ZFPM1	purple	-0.722212	0.000479616	0.832711	9.68e-06
ENSSSCG00000040961	LIF	purple	0.64904	0.00264104	-0.724664	0.000448947
ENSSSCG00000040981	GMFG	purple	0.836482	8.09e-06	-0.922262	1.97e-08
ENSSSCG00000041202	SREK1IP1	purple	-0.791778	5.36e-05	0.87206	1.14e-06
ENSSSCG00000041233	-	purple	0.620348	0.0046005	-0.616143	0.00496847
ENSSSCG00000041245	-	purple	-0.515173	0.0239889	0.54037	0.0169149
ENSSSCG00000041348	-	purple	-0.528987	0.0198695	0.624577	0.00425332
ENSSSCG00000041350	-	purple	-0.340283	0.154007	0.288041	0.231753
ENSSSCG00000041354	-	purple	-0.328779	0.16932	0.455602	0.0499593
ENSSSCG00000041379	-	purple	-0.63753	0.0033212	0.839927	6.83e-06
ENSSSCG00000041410	-	purple	-0.576553	0.00976511	0.645565	0.00283296
ENSSSCG00000041479	-	purple	0.34287	0.1507	-0.557547	0.0131289
ENSSSCG00000041589	-	purple	-0.599019	0.00672504	0.455113	0.050237
ENSSSCG00000041622	-	purple	-0.548687	0.014986	0.666472	0.0018332
ENSSSCG00000041850	-	purple	-0.606252	0.00592989	0.772081	0.000107522
ENSSSCG00000041993	-	purple	-0.494075	0.0315449	0.601827	0.00640664
ENSSSCG00000042114	-	purple	-0.698881	0.000871111	0.615423	0.00503389
ENSSSCG00000042139	-	purple	-0.618478	0.00476133	0.725827	0.000434991
ENSSSCG00000042149	-	purple	0.352669	0.138619	-0.437316	0.0611555
ENSSSCG00000042427	-	purple	-0.586998	0.00823716	0.674483	0.0015379
ENSSSCG00000042478	-	purple	0.357125	0.133355	-0.601227	0.00647355
ENSSSCG00000042560	-	purple	0.458497	0.0483405	-0.517085	0.0233817
ENSSSCG00000042561	-	purple	-0.485753	0.0349894	0.565686	0.0115899
ENSSSCG00000042629	-	purple	-0.451741	0.0521824	0.619179	0.00470048
ENSSSCG00000042756	-	purple	0.777725	8.87e-05	-0.897661	1.87e-07
ENSSSCG00000042815	-	purple	-0.717408	0.000544863	0.898318	1.78e-07
ENSSSCG00000042862	-	purple	0.616167	0.00496632	-0.574722	0.0100551
ENSSSCG00000043012	-	purple	-0.872971	1.08e-06	0.953501	2.78e-10
ENSSSCG00000043077	-	purple	-0.16279	0.505489	0.322228	0.178489
ENSSSCG00000043103	-	purple	-0.561063	0.0124451	0.54099	0.0167645
ENSSSCG00000043339	-	purple	0.209217	0.390001	-0.157583	0.519381
ENSSSCG00000043375	-	purple	-0.424769	0.0698634	0.464758	0.0449767
ENSSSCG00000043425	-	purple	-0.534002	0.0185211	0.538872	0.0172822
ENSSSCG00000043454	-	purple	0.861593	2.14e-06	-0.903666	1.14e-07
ENSSSCG00000043513	-	purple	-0.377332	0.111245	0.329585	0.168215
ENSSSCG00000043598	-	purple	-0.705957	0.000731166	0.836864	7.94e-06
ENSSSCG00000043705	-	purple	-0.580896	0.00910424	0.584497	0.00858406
ENSSSCG00000043732	-	purple	0.200328	0.410898	-0.132528	0.588608
ENSSSCG00000043832	-	purple	-0.508414	0.0262352	0.567383	0.0112882
ENSSSCG00000043870	-	purple	-0.666945	0.00181454	0.591867	0.00759456
ENSSSCG00000043914	-	purple	-0.430904	0.0654978	0.460532	0.0472269
ENSSSCG00000044054	-	purple	0.174843	0.474037	-0.341504	0.152439
ENSSSCG00000044191	-	purple	-0.682708	0.00127715	0.742199	0.000274121
ENSSSCG00000044256	-	purple	-0.489127	0.0335597	0.543911	0.0160709
ENSSSCG00000044366	-	purple	-0.479585	0.0377252	0.61111	0.00544034
ENSSSCG00000044403	-	purple	0.448002	0.0544059	-0.358547	0.131705
ENSSSCG00000044447	-	purple	0.655656	0.00230539	-0.672668	0.00160108
ENSSSCG00000044591	-	purple	0.808304	2.82e-05	-0.88783	3.94e-07
ENSSSCG00000044633	-	purple	-0.621771	0.00448116	0.602174	0.00636807
ENSSSCG00000044639	-	purple	0.393702	0.0953656	-0.434973	0.0627161
ENSSSCG00000044767	-	purple	0.780728	7.99e-05	-0.835469	8.49e-06
ENSSSCG00000044775	-	purple	-0.353905	0.137143	0.581589	0.00900213
ENSSSCG00000044784	-	purple	-0.816789	1.98e-05	0.918561	2.89e-08
ENSSSCG00000044808	-	purple	-0.63648	0.00338986	0.786445	6.52e-05
ENSSSCG00000044894	-	purple	0.502131	0.0284677	-0.460095	0.0474643
ENSSSCG00000044921	-	purple	0.509287	0.0259359	-0.592649	0.00749519
ENSSSCG00000045090	SNORD36	purple	-0.296285	0.218065	0.332412	0.164376
ENSSSCG00000045125	-	purple	0.586808	0.00826314	-0.62859	0.00394406
ENSSSCG00000045141	-	purple	0.478261	0.0383333	-0.492061	0.0323534
ENSSSCG00000045348	TMEM213	purple	-0.600914	0.00650869	0.689921	0.00107995
ENSSSCG00000045356	-	purple	-0.551162	0.0144473	0.64275	0.00299677
ENSSSCG00000045417	-	purple	0.635799	0.00343499	-0.708768	0.000681097
ENSSSCG00000045435	-	purple	0.621407	0.00451149	-0.634037	0.00355412
ENSSSCG00000045471	-	purple	-0.46122	0.046855	0.435552	0.0623282
ENSSSCG00000045590	-	purple	-0.519921	0.0225037	0.590943	0.00771327
ENSSSCG00000045673	-	purple	-0.560769	0.0125012	0.529145	0.019826
ENSSSCG00000045724	-	purple	0.385452	0.103148	-0.355684	0.135041
ENSSSCG00000045744	-	purple	-0.219422	0.366751	0.352622	0.138675
ENSSSCG00000045863	-	purple	-0.406954	0.0837715	0.442627	0.0577262
ENSSSCG00000046104	-	purple	0.313841	0.19071	-0.506519	0.0268936
ENSSSCG00000046214	IFT22	purple	-0.545432	0.0157187	0.669302	0.0017239
ENSSSCG00000046305	-	purple	-0.43122	0.0652782	0.46573	0.0444708
ENSSSCG00000046475	-	purple	-0.619267	0.00469295	0.639851	0.00317358
ENSSSCG00000046488	-	purple	-0.755872	0.000181542	0.833051	9.53e-06
ENSSSCG00000046503	-	purple	-0.716837	0.000553098	0.605456	0.00601338
ENSSSCG00000046551	-	purple	0.272416	0.259183	-0.314647	0.189511
ENSSSCG00000046681	-	purple	-0.8048	3.25e-05	0.933739	5.27e-09
ENSSSCG00000046749	-	purple	0.216004	0.374449	-0.251255	0.299453
ENSSSCG00000046769	-	purple	-0.564231	0.0118539	0.579326	0.00933879
ENSSSCG00000047200	-	purple	0.389829	0.0989638	-0.457472	0.0489091
ENSSSCG00000047230	-	purple	0.586438	0.00831384	-0.659767	0.00211526
ENSSSCG00000047309	-	purple	-0.817213	1.94e-05	0.93613	3.89e-09
ENSSSCG00000047668	-	purple	-0.491935	0.0324043	0.407882	0.0830009
ENSSSCG00000047876	-	purple	-0.755143	0.000185696	0.919826	2.54e-08
ENSSSCG00000048105	-	purple	0.563838	0.0119259	-0.544897	0.015842
ENSSSCG00000048179	-	purple	-0.585809	0.00840063	0.652618	0.00245482
ENSSSCG00000048217	-	purple	-0.728574	0.000403471	0.908013	7.84e-08
ENSSSCG00000048319	-	purple	-0.44956	0.0534704	0.421134	0.072551
ENSSSCG00000048326	-	purple	-0.667859	0.00177894	0.751709	0.00020637
ENSSSCG00000048344	-	purple	0.588049	0.00809492	-0.64319	0.00297068
ENSSSCG00000048449	-	purple	-0.836132	8.22e-06	0.949883	5.19e-10
ENSSSCG00000048487	-	purple	-0.405014	0.085401	0.343596	0.14978
ENSSSCG00000048543	-	purple	0.448232	0.0542665	-0.419387	0.0738699
ENSSSCG00000048594	NRN1L	purple	-0.528582	0.0199819	0.55957	0.0127318
ENSSSCG00000048671	-	purple	0.385452	0.103148	-0.355684	0.135041
ENSSSCG00000048702	-	purple	-0.428427	0.067235	0.520732	0.0222572
ENSSSCG00000048799	-	purple	0.438259	0.0605359	-0.457633	0.0488198
ENSSSCG00000048948	-	purple	-0.541109	0.0167357	0.49481	0.0312541
ENSSSCG00000048983	-	purple	-0.45161	0.052259	0.551037	0.0144742
ENSSSCG00000049104	-	purple	0.614711	0.00509917	-0.682166	0.00129312
ENSSSCG00000049225	-	purple	-0.433213	0.063908	0.41262	0.0791447
ENSSSCG00000049235	-	purple	-0.438349	0.0604772	0.386334	0.102295
ENSSSCG00000049263	HAS3	purple	0.70059	0.000835406	-0.83861	7.29e-06
ENSSSCG00000049314	-	purple	-0.340587	0.153616	0.441887	0.0581956
ENSSSCG00000049358	-	purple	-0.64275	0.0029968	0.785075	6.85e-05
ENSSSCG00000049484	-	purple	-0.614756	0.00509505	0.730836	0.000378987
ENSSSCG00000049493	-	purple	0.0863324	0.72527	-0.103586	0.673022
ENSSSCG00000049508	-	purple	-0.372881	0.115873	0.378235	0.110324
ENSSSCG00000049565	-	purple	-0.405422	0.0850568	0.414684	0.0775076
ENSSSCG00000049595	-	purple	-0.324683	0.175014	0.298336	0.214745
ENSSSCG00000049663	-	purple	-0.519821	0.0225343	0.578486	0.00946639
ENSSSCG00000049800	-	purple	-0.332819	0.16383	0.326815	0.172035
ENSSSCG00000049863	-	purple	0.539049	0.0172386	-0.592423	0.00752388
ENSSSCG00000049875	-	purple	-0.212212	0.383095	0.304096	0.205595
ENSSSCG00000049971	-	purple	0.867893	1.48e-06	-0.958995	9.73e-11
ENSSSCG00000050381	-	purple	-0.720282	0.000504995	0.720485	0.000502275
ENSSSCG00000050427	-	purple	-0.226573	0.350937	0.360251	0.129748
ENSSSCG00000050454	-	purple	0.385452	0.103148	-0.355684	0.135041
ENSSSCG00000050539	-	purple	-0.37163	0.117197	0.367058	0.122131
ENSSSCG00000050687	-	purple	0.836201	8.2e-06	-0.892592	2.77e-07
ENSSSCG00000050951	-	purple	-0.478131	0.0383935	0.461851	0.0465157
ENSSSCG00000050957	-	purple	-0.374747	0.113916	0.428257	0.0673559
ENSSSCG00000051018	-	purple	-0.67519	0.00151387	0.627612	0.00401765
ENSSSCG00000051074	-	purple	-0.46924	0.0426806	0.485775	0.0349802
ENSSSCG00000051090	-	purple	-0.744064	0.000259527	0.686843	0.00116072
ENSSSCG00000051196	-	purple	-0.731932	0.000367585	0.884419	5.02e-07
ENSSSCG00000051233	-	purple	-0.463186	0.0458042	0.4121	0.0795612
ENSSSCG00000051272	-	purple	-0.49872	0.0297407	0.594182	0.00730358
ENSSSCG00000051363	-	purple	-0.457813	0.0487196	0.550024	0.0146929
ENSSSCG00000051376	-	purple	0.400404	0.0893653	-0.373951	0.114748
ENSSSCG00000051405	-	purple	-0.776398	9.29e-05	0.749577	0.000220167
ENSSSCG00000051662	-	purple	-0.562982	0.0120842	0.70342	0.000778997
ENSSSCG00000051690	-	purple	-0.555198	0.0136022	0.387691	0.100993
ENSSSCG00000051691	-	purple	-0.563836	0.0119263	0.74619	0.000243693

## Sheet: Module Sienna3
Ensembl ID	Gene name	Module color	GS	GS p-value	MM	MM p-value
ENSSSCG00000044922		sienna3	-0.57067	0.0107217	0.665282	0.00188081
ENSSSCG00000045787		sienna3	0.526002	0.0207083	-0.678152	0.00141659
ENSSSCG00000047456		sienna3	0.524251	0.0212133	-0.831744	1.01331e-05
ENSSSCG00000014556		sienna3	-0.46382	0.0454688	0.798421	4.17093e-05
ENSSSCG00000001672	CRIP3	sienna3	-0.462873	0.0459701	0.717613	0.000541931
ENSSSCG00000011543	LHFPL4	sienna3	0.451327	0.052425	-0.676053	0.00148497
ENSSSCG00000001416	LY6G5C	sienna3	-0.446438	0.0553564	0.629684	0.00386307
ENSSSCG00000050834		sienna3	0.442731	0.0576607	-0.82031	1.70025e-05
ENSSSCG00000017817	PRPF8	sienna3	0.436981	0.0613769	-0.806955	2.97905e-05
ENSSSCG00000051779		sienna3	-0.436633	0.0616078	0.839606	6.94041e-06
ENSSSCG00000006631	TMOD4	sienna3	-0.432278	0.0645479	0.712557	0.000618197
ENSSSCG00000011344		sienna3	-0.430722	0.0656237	0.711725	0.000631566
ENSSSCG00000009774	MTRFR	sienna3	-0.430176	0.0660044	0.628387	0.00395926
ENSSSCG00000047296		sienna3	-0.428977	0.0668463	0.785204	6.81743e-05
ENSSSCG00000050673		sienna3	-0.411248	0.0802476	0.69773	0.00089587
ENSSSCG00000031381		sienna3	0.406039	0.0845372	-0.792998	5.12404e-05
ENSSSCG00000047925		sienna3	-0.401139	0.0887242	0.836925	7.91376e-06
ENSSSCG00000051279		sienna3	-0.400573	0.0892178	0.6188	0.00473332
ENSSSCG00000050419		sienna3	-0.391547	0.0973557	0.802719	3.5277e-05
ENSSSCG00000050828		sienna3	-0.391173	0.0977047	0.591515	0.00763961
ENSSSCG00000005449	PTPN3	sienna3	0.387597	0.101082	-0.499457	0.0294622
ENSSSCG00000045404		sienna3	-0.386742	0.101902	0.72806	0.00040922
ENSSSCG00000002817	DRC7	sienna3	0.371189	0.117667	-0.632049	0.00369261
ENSSSCG00000008854	CPE	sienna3	-0.370821	0.118061	0.759543	0.000161801
ENSSSCG00000027362	LEXM	sienna3	-0.364352	0.12512	0.377083	0.111501
ENSSSCG00000045996		sienna3	0.346846	0.145713	-0.544238	0.0159945
ENSSSCG00000043704		sienna3	0.343602	0.149772	-0.56964	0.0108967
ENSSSCG00000049051		sienna3	-0.333566	0.162827	0.712209	0.000623751
ENSSSCG00000040166	FLRT2	sienna3	-0.329636	0.168145	0.845999	5.02552e-06
ENSSSCG00000049487		sienna3	-0.326351	0.172681	0.443184	0.0573751
ENSSSCG00000029092	LRRD1	sienna3	-0.312318	0.192986	0.679069	0.00138755
ENSSSCG00000022064	MLNR	sienna3	-0.31185	0.19369	0.437099	0.0612988
ENSSSCG00000031448		sienna3	-0.306207	0.202308	0.355	0.135847
ENSSSCG00000047196		sienna3	0.294076	0.22168	-0.704721	0.000754155
ENSSSCG00000037288	YPEL1	sienna3	-0.28597	0.235276	0.591012	0.00770429
ENSSSCG00000044301		sienna3	-0.282913	0.24054	0.476248	0.0392723
ENSSSCG00000009926		sienna3	-0.278581	0.248126	0.764672	0.000137301
ENSSSCG00000021036	RAB3B	sienna3	-0.277607	0.249853	0.6705	0.00167933
ENSSSCG00000006306	MPZL1	sienna3	0.276035	0.252655	-0.503681	0.0279039
ENSSSCG00000018448	SNORA66	sienna3	-0.272876	0.258347	0.53961	0.0171005
ENSSSCG00000002986	SELENOV	sienna3	-0.271567	0.260729	0.454548	0.0505591
ENSSSCG00000039433		sienna3	-0.271317	0.261186	0.496005	0.0307852
ENSSSCG00000013842	CYP4F3	sienna3	-0.270819	0.262096	0.538597	0.0173505
ENSSSCG00000034767	LAMA1	sienna3	-0.263037	0.276588	0.322272	0.178427
ENSSSCG00000010288	DNAJB12	sienna3	0.262368	0.277856	-0.663444	0.00195641
ENSSSCG00000050157		sienna3	-0.262087	0.278389	0.530168	0.0195454
ENSSSCG00000045695		sienna3	-0.258405	0.285445	0.525134	0.0209574
ENSSSCG00000022534	ZNF644	sienna3	-0.257955	0.286313	0.871541	1.17832e-06
ENSSSCG00000051763		sienna3	-0.245852	0.310309	0.518612	0.0229056
ENSSSCG00000035506	UBAP1L	sienna3	-0.244556	0.312948	0.534941	0.0182769
ENSSSCG00000050229		sienna3	-0.243653	0.314796	0.517078	0.0233839
ENSSSCG00000047412		sienna3	0.242658	0.316837	-0.55477	0.01369
ENSSSCG00000024763		sienna3	-0.241106	0.320038	0.513341	0.024582
ENSSSCG00000010614	CFAP58	sienna3	0.241048	0.320158	-0.678464	0.00140665
ENSSSCG00000001906	CYP1A1	sienna3	0.241046	0.320163	-0.426267	0.0687782
ENSSSCG00000034659		sienna3	0.230888	0.341589	-0.561577	0.0123476
ENSSSCG00000037101	LRRC8B	sienna3	0.220973	0.363286	-0.702409	0.000798753
ENSSSCG00000046474		sienna3	0.220193	0.365028	-0.580401	0.00917758
ENSSSCG00000009357	SMAD9	sienna3	-0.219572	0.366415	0.550688	0.0145492
ENSSSCG00000037669	PTPN7	sienna3	0.217076	0.372025	-0.629451	0.00388023
ENSSSCG00000004781	PAK6	sienna3	0.209356	0.389678	-0.937941	3.06425e-09
ENSSSCG00000037019	CAMK4	sienna3	-0.20821	0.392339	0.278738	0.247849
ENSSSCG00000043652		sienna3	-0.208121	0.392546	0.434508	0.0630294
ENSSSCG00000042167		sienna3	0.206102	0.397256	-0.481413	0.0368979
ENSSSCG00000043152		sienna3	0.203143	0.404217	-0.684832	0.00121619
ENSSSCG00000017502	PGAP3	sienna3	0.20227	0.406283	-0.663306	0.0019622
ENSSSCG00000041710		sienna3	-0.201524	0.408052	0.758075	0.000169465
ENSSSCG00000000611		sienna3	0.200024	0.411623	-0.84448	5.43315e-06
ENSSSCG00000045210		sienna3	0.199858	0.412021	-0.514228	0.0242936
ENSSSCG00000049931		sienna3	0.198537	0.415182	-0.553731	0.0139047
ENSSSCG00000046809		sienna3	0.198137	0.416142	-0.508554	0.0261869
ENSSSCG00000035077	INHBA	sienna3	-0.195792	0.42179	0.600705	0.00653227
ENSSSCG00000000509	ZFC3H1	sienna3	-0.193142	0.428225	0.942221	1.69407e-09
ENSSSCG00000047223		sienna3	0.191583	0.432033	-0.380246	0.108289
ENSSSCG00000004638	USP50	sienna3	0.182351	0.45495	0.846887	4.79989e-06
ENSSSCG00000036626		sienna3	-0.181229	0.457778	0.481605	0.0368117
ENSSSCG00000049465		sienna3	-0.181182	0.457897	0.67279	0.00159676
ENSSSCG00000036439	IL29	sienna3	-0.179168	0.462993	0.475792	0.0394875
ENSSSCG00000045479		sienna3	-0.176647	0.469414	0.756459	0.000178257
ENSSSCG00000041637		sienna3	0.175838	0.471484	-0.570495	0.0107514
ENSSSCG00000028157	CASP8	sienna3	-0.172393	0.480351	0.883206	5.46683e-07
ENSSSCG00000050369		sienna3	-0.171886	0.48166	0.589508	0.00790059
ENSSSCG00000040566	N4BP2L1	sienna3	0.170909	0.484194	0.796434	4.50077e-05
ENSSSCG00000046801		sienna3	-0.170148	0.48617	0.496326	0.0306602
ENSSSCG00000015497	KLHL20	sienna3	0.16886	0.489527	0.852812	3.50545e-06
ENSSSCG00000046459		sienna3	0.168183	0.491294	-0.670556	0.00167727
ENSSSCG00000001033	SLC35B3	sienna3	0.167633	0.492732	0.881774	6.03274e-07
ENSSSCG00000016113	BMPR2	sienna3	0.165501	0.498329	-0.599739	0.00664215
ENSSSCG00000042002		sienna3	-0.164548	0.50084	0.546781	0.0154118
ENSSSCG00000039285	MFN1	sienna3	0.162644	0.505878	0.847214	4.71882e-06
ENSSSCG00000026991	LURAP1	sienna3	-0.161747	0.508257	0.683532	0.00125321
ENSSSCG00000008484	SRSF7	sienna3	-0.161524	0.50885	0.595317	0.00716432
ENSSSCG00000002935		sienna3	0.158633	0.516566	0.842419	6.03194e-06
ENSSSCG00000008737	C1QTNF7	sienna3	-0.155661	0.524551	0.448632	0.0540262
ENSSSCG00000049811		sienna3	-0.152656	0.532686	0.546671	0.0154366
ENSSSCG00000035875	OS9	sienna3	0.152394	0.533398	-0.806688	3.01134e-05
ENSSSCG00000019359	MIR27B	sienna3	-0.150237	0.539274	0.701591	0.000815074
ENSSSCG00000035776		sienna3	-0.149368	0.541651	0.494327	0.031445
ENSSSCG00000031883		sienna3	0.140799	0.565332	0.891387	3.03504e-07
ENSSSCG00000035069	CHSY3	sienna3	-0.139538	0.568855	0.817294	1.9373e-05
ENSSSCG00000012617	UPF3B	sienna3	-0.137795	0.573739	0.549595	0.0147865
ENSSSCG00000050986		sienna3	0.136197	0.578234	-0.516785	0.0234764
ENSSSCG00000049592		sienna3	-0.13399	0.584465	0.544953	0.015829
ENSSSCG00000011726	VEPH1	sienna3	-0.132682	0.588172	0.53264	0.01888
ENSSSCG00000010943	AOPEP	sienna3	-0.131528	0.591449	0.619618	0.00466278
ENSSSCG00000003783	FPGT	sienna3	-0.131257	0.592221	0.930563	7.76112e-09
ENSSSCG00000018450	SNORD100	sienna3	0.131047	0.592819	-0.336687	0.158687
ENSSSCG00000044467		sienna3	0.129786	0.596414	-0.588001	0.00810139
ENSSSCG00000007671	TFR2	sienna3	-0.129735	0.596558	-0.80775	2.88469e-05
ENSSSCG00000049463		sienna3	0.124798	0.610716	-0.342112	0.151664
ENSSSCG00000042157		sienna3	0.119073	0.627306	-0.519318	0.0226883
ENSSSCG00000029170	ZNF566	sienna3	-0.118949	0.627666	0.658174	0.00218731
ENSSSCG00000044155		sienna3	-0.11823	0.629761	0.4873	0.034328
ENSSSCG00000030413	PIK3CA	sienna3	0.117672	0.63139	0.828921	1.15546e-05
ENSSSCG00000022451	WDR73	sienna3	-0.115851	0.636714	0.730716	0.000380248
ENSSSCG00000041970		sienna3	-0.114218	0.641506	0.509015	0.0260289
ENSSSCG00000038617	PCMTD2	sienna3	0.113626	0.643246	0.892948	2.69824e-07
ENSSSCG00000049605		sienna3	-0.112501	0.646558	0.563642	0.0119621
ENSSSCG00000006748	TSPAN2	sienna3	0.112102	0.647735	-0.680256	0.00135069
ENSSSCG00000051291		sienna3	-0.111941	0.648209	0.708441	0.000686771
ENSSSCG00000023437	ITPR1	sienna3	0.109909	0.654211	-0.917113	3.33677e-08
ENSSSCG00000009534		sienna3	0.100497	0.682279	0.90279	1.23044e-07
ENSSSCG00000014558	SIRT3	sienna3	0.0971297	0.69242	0.63842	0.00326398
ENSSSCG00000040265	UBFD1	sienna3	-0.0957529	0.696581	-0.759977	0.000159596
ENSSSCG00000012416	CHIC1	sienna3	0.0950626	0.69867	0.886247	4.41573e-07
ENSSSCG00000001197	ZNF165	sienna3	-0.0946382	0.699956	0.890385	3.26975e-07
ENSSSCG00000035650		sienna3	-0.0923646	0.706857	0.659451	0.00212941
ENSSSCG00000020987	WDR31	sienna3	-0.0908597	0.711437	-0.815889	2.05712e-05
ENSSSCG00000044147		sienna3	0.0902197	0.713387	-0.513098	0.0246617
ENSSSCG00000044489		sienna3	0.0901064	0.713732	-0.516921	0.0234334
ENSSSCG00000049596		sienna3	0.0886322	0.718232	-0.901336	1.38879e-07
ENSSSCG00000046006		sienna3	0.0883277	0.719163	-0.445157	0.056145
ENSSSCG00000041705		sienna3	0.0857757	0.726977	-0.50617	0.0270161
ENSSSCG00000039378	SERPINA4	sienna3	0.0841908	0.731843	-0.461952	0.0464613
ENSSSCG00000035973	LSM6	sienna3	0.0841316	0.732025	0.897867	1.84055e-07
ENSSSCG00000041485		sienna3	-0.0811179	0.741306	-0.545945	0.0156014
ENSSSCG00000011768	CCDC39	sienna3	-0.0799916	0.744783	0.843648	5.66837e-06
ENSSSCG00000008266	LOXL3	sienna3	0.0799625	0.744873	0.827525	1.23185e-05
ENSSSCG00000050844		sienna3	-0.0777172	0.751819	0.821539	1.61105e-05
ENSSSCG00000026506	RALGAPA2	sienna3	-0.0768888	0.754386	-0.717501	0.000543533
ENSSSCG00000045490		sienna3	-0.0760493	0.756991	0.41345	0.0784834
ENSSSCG00000043116		sienna3	-0.075685	0.758122	0.825156	1.3715e-05
ENSSSCG00000003070	ZNF45	sienna3	-0.0723956	0.768354	0.863064	1.96832e-06
ENSSSCG00000002392		sienna3	-0.0708247	0.773254	-0.883766	5.25824e-07
ENSSSCG00000006912	HFM1	sienna3	-0.0707771	0.773403	0.710575	0.000650457
ENSSSCG00000033501		sienna3	-0.0700481	0.77568	0.668898	0.00173916
ENSSSCG00000002390	ANGEL1	sienna3	-0.0696072	0.777057	-0.826174	1.3099e-05
ENSSSCG00000015569	SWT1	sienna3	-0.0694534	0.777538	0.724851	0.000446678
ENSSSCG00000008748	LCORL	sienna3	-0.067201	0.784588	0.759556	0.000161736
ENSSSCG00000023498	HSPB6	sienna3	0.058065	0.813343	-0.876411	8.63097e-07
ENSSSCG00000000554	FGFR1OP2	sienna3	0.0573913	0.815473	0.758759	0.000165855
ENSSSCG00000017389	RAMP2	sienna3	-0.0573551	0.815588	0.569846	0.0108616
ENSSSCG00000012503		sienna3	0.0549301	0.823265	-0.486303	0.0347533
ENSSSCG00000028561	CD28	sienna3	0.0542009	0.825576	-0.492449	0.0321963
ENSSSCG00000011862	MUC13	sienna3	-0.0489662	0.84221	0.556438	0.0133506
ENSSSCG00000021270	THAP2	sienna3	-0.0489565	0.842241	0.916373	3.5893e-08
ENSSSCG00000044948		sienna3	0.0400153	0.870798	-0.589859	0.00785443
ENSSSCG00000011256	SLC22A13	sienna3	0.0341382	0.889654	0.635899	0.00342838
ENSSSCG00000011448	GLT8D1	sienna3	0.0330796	0.893056	0.832812	9.63612e-06
ENSSSCG00000022177	DIS3L2	sienna3	0.032546	0.894772	-0.911568	5.6754e-08
ENSSSCG00000051511		sienna3	-0.0270609	0.912435	0.595381	0.00715656
ENSSSCG00000004309	CNR1	sienna3	-0.0261481	0.915379	0.842084	6.13435e-06
ENSSSCG00000049455		sienna3	-0.0250194	0.91902	-0.743227	0.000265993
ENSSSCG00000015313		sienna3	0.0249473	0.919252	0.922387	1.94348e-08
ENSSSCG00000014310	CXCL14	sienna3	-0.0226386	0.926705	0.838968	7.16211e-06
ENSSSCG00000033739		sienna3	-0.0214053	0.930689	-0.576176	0.00982426
ENSSSCG00000001156	ZNF322	sienna3	0.0212896	0.931062	0.900728	1.46019e-07
ENSSSCG00000023349	ZNF768	sienna3	0.0201316	0.934804	-0.851153	3.83302e-06
ENSSSCG00000008501	VIT	sienna3	-0.0194622	0.936968	0.622119	0.00445243
ENSSSCG00000005383	ALG2	sienna3	-0.0188456	0.938961	0.707659	0.000700491
ENSSSCG00000014934	CHORDC1	sienna3	-0.0143108	0.953632	0.781908	7.66599e-05
ENSSSCG00000025701	NCK1	sienna3	-0.0138204	0.955219	0.881285	6.23773e-07
ENSSSCG00000015943	GORASP2	sienna3	-0.0108402	0.964869	-0.816499	2.00433e-05
ENSSSCG00000003989		sienna3	0.00902383	0.970753	0.855144	3.08607e-06
ENSSSCG00000009973	RHBDD3	sienna3	-0.00820971	0.973391	-0.561496	0.0123629
ENSSSCG00000002991	TTC9B	sienna3	0.00741306	0.975972	-0.426699	0.0684673
ENSSSCG00000015908	TTC21B	sienna3	-0.00620611	0.979883	0.601054	0.00649296
ENSSSCG00000031809	ZKSCAN5	sienna3	-0.0058298	0.981103	0.927045	1.16713e-08
ENSSSCG00000010181	C1orf198	sienna3	-0.00545896	0.982305	-0.72968	0.000391337

## Sheet: Module Cyan
Ensembl ID	Gene name	Module color	GS	GS p-value	MM	MM p-value
ENSSSCG00000025460	SPSB2	cyan	-0.639975	0.00316582	0.716382	0.000559729
ENSSSCG00000025126	LGI4	cyan	-0.625474	0.00418254	0.706075	0.000729014
ENSSSCG00000007559	MAFK	cyan	-0.608138	0.00573576	0.896546	2.04351e-07
ENSSSCG00000009244	SEC31A	cyan	0.601478	0.00644546	-0.775796	9.47983e-05
ENSSSCG00000001520	LEMD2	cyan	-0.595216	0.00717665	0.885183	4.76156e-07
ENSSSCG00000007520		cyan	-0.594199	0.00730151	0.614276	0.00513947
ENSSSCG00000013775	ADGRE5	cyan	0.593099	0.00743862	-0.632115	0.00368789
ENSSSCG00000038938	FIS1	cyan	-0.586655	0.00828408	0.758832	0.000165475
ENSSSCG00000031589		cyan	0.583439	0.00873427	-0.825035	1.37902e-05
ENSSSCG00000042400		cyan	0.578619	0.00944596	-0.842322	6.06146e-06
ENSSSCG00000011688		cyan	-0.561297	0.0124006	0.704681	0.000754905
ENSSSCG00000011928	CCDC80	cyan	-0.560311	0.012589	0.737708	0.000312159
ENSSSCG00000049913		cyan	0.558698	0.0129017	-0.642878	0.00298917
ENSSSCG00000012377	KIF4A	cyan	0.555845	0.0134705	-0.878775	7.38587e-07
ENSSSCG00000011201	SATB1	cyan	-0.547932	0.0151534	0.764884	0.000136357
ENSSSCG00000048756		cyan	0.545299	0.0157493	-0.845087	5.26703e-06
ENSSSCG00000033649		cyan	0.544624	0.0159051	-0.865198	1.73538e-06
ENSSSCG00000005683		cyan	-0.542214	0.016471	0.585087	0.00850122
ENSSSCG00000006132	MMP16	cyan	0.540328	0.0169252	-0.577595	0.00960308
ENSSSCG00000022265	C19orf25	cyan	-0.531473	0.0191919	0.879331	7.11701e-07
ENSSSCG00000026590	HGH1	cyan	-0.529339	0.0197725	0.724218	0.000454406
ENSSSCG00000003269	LENG9	cyan	-0.529175	0.0198177	0.740212	0.00029044
ENSSSCG00000036434	TPGS1	cyan	-0.527378	0.0203183	0.751257	0.000209237
ENSSSCG00000000849	HSP90B1	cyan	0.526356	0.0206074	-0.829935	1.10253e-05
ENSSSCG00000038487	TMPO	cyan	0.523824	0.0213378	-0.750657	0.000213082
ENSSSCG00000035923	JMJD6	cyan	-0.519914	0.0225056	0.65798	0.00219624
ENSSSCG00000031423	UPK3A	cyan	-0.517216	0.0233407	0.707023	0.000711824
ENSSSCG00000001701	HSP90AB1	cyan	0.515735	0.0238091	-0.810736	2.55292e-05
ENSSSCG00000021798	LZTS2	cyan	-0.514291	0.0242731	0.906598	8.87832e-08
ENSSSCG00000004725	ZNF106	cyan	0.511818	0.0250841	-0.901519	1.36792e-07
ENSSSCG00000027629	CDIPT	cyan	-0.511405	0.0252215	0.764132	0.000139718
ENSSSCG00000013405	EIF4G2	cyan	0.505338	0.0273105	-0.850148	4.04407e-06
ENSSSCG00000020868	TMEM192	cyan	0.504063	0.0277661	-0.826585	1.28574e-05
ENSSSCG00000013937	TSSK6	cyan	-0.503448	0.027988	0.741582	0.000279105
ENSSSCG00000007642		cyan	-0.503323	0.0280334	0.880537	6.5621e-07
ENSSSCG00000031536	MYCT1	cyan	0.502333	0.0283937	-0.785301	6.79365e-05
ENSSSCG00000024722	PIBF1	cyan	0.496924	0.0304287	-0.599702	0.00664635
ENSSSCG00000035750		cyan	0.495511	0.0309785	-0.837521	7.68777e-06
ENSSSCG00000007108	KIZ	cyan	0.490087	0.0331612	-0.845026	5.28351e-06
ENSSSCG00000003229	ETFB	cyan	0.488798	0.0336971	-0.766166	0.000130786
ENSSSCG00000001612		cyan	0.48742	0.0342771	-0.646135	0.00280072
ENSSSCG00000033148	MRPL12	cyan	-0.486251	0.0347757	0.745106	0.000251662
ENSSSCG00000011837	MELTF	cyan	-0.48545	0.0351201	0.769637	0.000116665
ENSSSCG00000004937	SLC24A1	cyan	0.484058	0.0357253	-0.728575	0.000403453
ENSSSCG00000038079	CLPP	cyan	-0.48304	0.0361734	0.892576	2.77548e-07
ENSSSCG00000002447	CPSF2	cyan	0.482158	0.0365647	-0.8297	1.11461e-05
ENSSSCG00000001052	PHACTR1	cyan	-0.481707	0.0367659	0.843964	5.57792e-06
ENSSSCG00000032145	IRX5	cyan	-0.474629	0.0400408	0.875555	9.12477e-07
ENSSSCG00000002658	FOXL1	cyan	-0.471269	0.0416717	0.780481	8.06036e-05
ENSSSCG00000005916		cyan	-0.470025	0.0422883	0.814653	2.16779e-05
ENSSSCG00000043490		cyan	0.467592	0.0435142	-0.744978	0.00025262
ENSSSCG00000027324	VPS35L	cyan	0.467161	0.0437344	-0.72705	0.000420704
ENSSSCG00000000863	SYCP3	cyan	-0.464538	0.045092	0.767411	0.000125564
ENSSSCG00000027105	TUBGCP5	cyan	0.464193	0.045273	-0.696486	0.000923282
ENSSSCG00000037562	SLC2A4RG	cyan	-0.463789	0.0454855	0.865992	1.6551e-06
ENSSSCG00000026103	ZBTB17	cyan	-0.461065	0.0469384	0.88562	4.61677e-07
ENSSSCG00000046793		cyan	-0.457963	0.0486361	0.77746	8.95312e-05
ENSSSCG00000028790	ANKRD16	cyan	-0.456325	0.0495514	0.717666	0.000541184
ENSSSCG00000024242	MRPL54	cyan	0.454243	0.0507335	-0.70709	0.000710621
ENSSSCG00000040779		cyan	-0.454037	0.0508513	0.862109	2.08093e-06
ENSSSCG00000003091	IRF2BP1	cyan	-0.453831	0.0509698	0.902507	1.26001e-07
ENSSSCG00000039681	B9D1	cyan	-0.446482	0.0553294	0.925437	1.39699e-08
ENSSSCG00000035739	SLC26A1	cyan	-0.443764	0.0570114	0.717759	0.00053986
ENSSSCG00000003360	WRAP73	cyan	-0.443457	0.0572036	0.663706	0.00194552
ENSSSCG00000032106	SURF6	cyan	-0.443056	0.0574557	0.618764	0.0047364
ENSSSCG00000017152	SGSH	cyan	-0.442788	0.0576251	0.869401	1.34575e-06
ENSSSCG00000022004	SH3BP2	cyan	-0.442317	0.0579225	0.894127	2.46618e-07
ENSSSCG00000003895	EFCAB14	cyan	0.44227	0.0579522	-0.774509	9.90513e-05
ENSSSCG00000002529		cyan	-0.438599	0.0603139	0.86174	2.12605e-06
ENSSSCG00000022289	PCDH1	cyan	-0.437768	0.0608581	0.957361	1.34821e-10
ENSSSCG00000007312	SCAND1	cyan	-0.435603	0.0622937	0.910893	6.0402e-08
ENSSSCG00000015426	RELN	cyan	0.435221	0.0625495	-0.603004	0.00627681
ENSSSCG00000017376	MEOX1	cyan	0.434577	0.0629832	-0.619848	0.0046431
ENSSSCG00000040296	EHHADH	cyan	0.434392	0.0631081	-0.869286	1.35524e-06
ENSSSCG00000031877	ABHD8	cyan	-0.432922	0.0641066	0.764655	0.000137374
ENSSSCG00000043171		cyan	0.432593	0.0643322	-0.550895	0.0145047
ENSSSCG00000002831	IRX3	cyan	-0.431624	0.0649987	0.939097	2.62217e-09
ENSSSCG00000036712	TPD52L2	cyan	-0.42927	0.0666401	0.891311	3.0523e-07
ENSSSCG00000046127		cyan	0.42555	0.0692965	-0.925733	1.35194e-08
ENSSSCG00000013991	C1orf35	cyan	-0.425187	0.0695597	0.513772	0.0244417
ENSSSCG00000027165	UBE2G2	cyan	-0.424993	0.0697007	0.968277	1.13296e-11
ENSSSCG00000028878	BCAR1	cyan	-0.424326	0.0701869	0.953035	3.02034e-10
ENSSSCG00000045387		cyan	-0.423182	0.0710275	0.781477	7.78329e-05
ENSSSCG00000005662	SPOUT1	cyan	-0.422573	0.0714783	0.910982	5.99095e-08
ENSSSCG00000017290	STRADA	cyan	0.421233	0.0724771	-0.658645	0.00216581
ENSSSCG00000039139	AKT1	cyan	-0.420448	0.0730666	0.977595	6.08482e-13
ENSSSCG00000009553	TUBGCP3	cyan	-0.419871	0.0735027	0.882687	5.66645e-07
ENSSSCG00000016733		cyan	-0.419619	0.0736938	0.821132	1.64008e-05
ENSSSCG00000046995		cyan	0.418122	0.0748355	-0.764792	0.000136767
ENSSSCG00000010627	PDCD4	cyan	0.417679	0.0751755	-0.801148	3.75214e-05
ENSSSCG00000007206	RBCK1	cyan	-0.416898	0.0757785	0.918666	2.85667e-08
ENSSSCG00000014302	CDKL3	cyan	0.416214	0.0763096	-0.654692	0.00235197
ENSSSCG00000013715		cyan	0.412041	0.0796092	-0.719402	0.000516929
ENSSSCG00000028446	PCBP4	cyan	-0.411915	0.0797099	0.948645	6.35934e-10
ENSSSCG00000003344	VWA1	cyan	-0.410145	0.0811422	0.87324	1.05858e-06
ENSSSCG00000018712	ssc-mir-339-1	cyan	-0.408035	0.0828745	0.703528	0.000776909
ENSSSCG00000015482	VAMP4	cyan	-0.406879	0.0838341	0.581603	0.00900006
ENSSSCG00000030497	YAE1	cyan	0.406034	0.0845417	-0.769961	0.000115416
ENSSSCG00000031630	DPH7	cyan	-0.405228	0.0852201	0.660675	0.00207507
ENSSSCG00000038712	ZNF577	cyan	0.402797	0.0872906	-0.839159	7.09496e-06
ENSSSCG00000030065	ZBTB47	cyan	-0.402727	0.0873514	0.797545	4.31369e-05
ENSSSCG00000034776	TAFA5	cyan	-0.40063	0.0891679	0.96222	4.90196e-11
ENSSSCG00000012920	CORO1B	cyan	-0.399939	0.0897723	0.942762	1.56674e-09
ENSSSCG00000016545	CHCHD3	cyan	0.39879	0.090784	-0.707405	0.000705011
ENSSSCG00000016961	CDK7	cyan	0.398432	0.0911015	-0.817101	1.95345e-05
ENSSSCG00000003908	TSPAN1	cyan	-0.398055	0.0914355	0.676306	0.00147658
ENSSSCG00000017748	NF1	cyan	0.397208	0.0921916	-0.724735	0.000448086
ENSSSCG00000011193	BTD	cyan	0.395832	0.0934281	-0.646915	0.00275711
ENSSSCG00000005749	BRD3	cyan	-0.395603	0.0936351	0.862669	2.01423e-06
ENSSSCG00000001543	RPL10A	cyan	0.393744	0.0953276	-0.758351	0.000168002
ENSSSCG00000038285	KLHL36	cyan	-0.392283	0.0966726	0.933082	5.71874e-09
ENSSSCG00000036553	SAMD12	cyan	0.39132	0.0975669	-0.547679	0.0152098
ENSSSCG00000006552	HAX1	cyan	0.390432	0.0983972	-0.792648	5.1914e-05
ENSSSCG00000037390		cyan	-0.387227	0.101436	0.77949	8.34448e-05
ENSSSCG00000049383		cyan	-0.385352	0.103245	0.558036	0.0130321
ENSSSCG00000049962		cyan	0.383093	0.105455	-0.700938	0.000828286
ENSSSCG00000016267	ITM2C	cyan	-0.381025	0.107509	0.811004	2.52483e-05
ENSSSCG00000003109	TMEM160	cyan	-0.380986	0.107547	0.915814	3.79113e-08
ENSSSCG00000005759	MRPS2	cyan	-0.380283	0.108252	0.952172	3.51535e-10
ENSSSCG00000040732	WDR81	cyan	-0.379025	0.109521	0.917103	3.34013e-08
ENSSSCG00000039360	LRFN4	cyan	-0.37782	0.110746	0.912605	5.15237e-08
ENSSSCG00000039881	GLI4	cyan	-0.375814	0.112808	0.890283	3.29454e-07
ENSSSCG00000017506	FBXL20	cyan	0.374923	0.113734	-0.79148	5.42204e-05
ENSSSCG00000008498	HEATR5B	cyan	0.374472	0.114203	-0.641926	0.00304617
ENSSSCG00000036967	ARL8A	cyan	-0.373854	0.11485	0.888936	3.63745e-07
ENSSSCG00000009626	SORBS3	cyan	-0.373803	0.114903	0.862613	2.02083e-06
ENSSSCG00000026084	SLC49A3	cyan	-0.37236	0.116423	0.747389	0.000235131
ENSSSCG00000044493		cyan	0.372277	0.116511	-0.556844	0.013269
ENSSSCG00000050239		cyan	-0.372144	0.116652	0.56757	0.0112554
ENSSSCG00000014211	YTHDC2	cyan	0.372017	0.116787	-0.682266	0.00129017
ENSSSCG00000003439	DHRS3	cyan	-0.371381	0.117463	0.614153	0.00515083
ENSSSCG00000012970	CTSW	cyan	-0.370932	0.117942	0.716733	0.000554613
ENSSSCG00000017131	FN3K	cyan	-0.370803	0.11808	0.763907	0.00014074
ENSSSCG00000035949	FTO	cyan	0.369853	0.119098	-0.489297	0.0334888
ENSSSCG00000001810	PDE8A	cyan	0.367916	0.121195	-0.800974	3.77772e-05
ENSSSCG00000022995		cyan	-0.367775	0.121348	0.513356	0.0245772
ENSSSCG00000024841	SLC35A2	cyan	-0.367351	0.121811	0.882768	5.63481e-07
ENSSSCG00000010520	MMS19	cyan	0.366211	0.123062	-0.684443	0.00122717
ENSSSCG00000012904	AIP	cyan	-0.365413	0.123942	0.800769	3.80809e-05
ENSSSCG00000022719	RAB20	cyan	-0.365092	0.124298	0.883324	5.4223e-07
ENSSSCG00000044458		cyan	0.36226	0.127466	-0.703611	0.000775306
ENSSSCG00000030798	FUS	cyan	-0.360928	0.128976	0.739625	0.000295413
ENSSSCG00000034216	OGFR	cyan	-0.359131	0.131032	0.86079	2.24586e-06
ENSSSCG00000045495		cyan	0.359058	0.131117	-0.62483	0.00423327
ENSSSCG00000020872		cyan	-0.357853	0.132509	0.903951	1.11548e-07
ENSSSCG00000034656	RTN4R	cyan	-0.357765	0.132611	0.855938	2.95349e-06
ENSSSCG00000005514	RAB14	cyan	-0.356054	0.134607	0.632413	0.00366688
ENSSSCG00000026142	TNK1	cyan	-0.352983	0.138243	0.891672	2.97085e-07
ENSSSCG00000051252		cyan	-0.350342	0.141424	0.917287	3.27976e-08
ENSSSCG00000038844	SMIM5	cyan	-0.34881	0.143292	0.601289	0.00646658
ENSSSCG00000032467	RAB5C	cyan	-0.347333	0.14511	0.939771	2.39083e-09
ENSSSCG00000037749		cyan	-0.342297	0.151428	0.478117	0.0383998
ENSSSCG00000001421	ZBTB12	cyan	-0.342236	0.151506	0.64235	0.00302067
ENSSSCG00000003115	MEIS3	cyan	-0.342124	0.151648	0.719951	0.000509461
ENSSSCG00000009560	TFDP1	cyan	-0.341527	0.15241	0.954371	2.37419e-10
ENSSSCG00000035118	BRD9	cyan	-0.341006	0.153078	0.929375	8.9291e-09
ENSSSCG00000008836	SCFD2	cyan	0.339525	0.154985	-0.61793	0.00480933
ENSSSCG00000045854		cyan	-0.338675	0.156088	0.518995	0.0227873
ENSSSCG00000037517	RBM11	cyan	-0.338407	0.156436	0.524602	0.0211112
ENSSSCG00000025913		cyan	-0.337603	0.157486	0.869164	1.3655e-06
ENSSSCG00000014625	TRIM3	cyan	-0.337351	0.157816	0.97611	1.04452e-12
ENSSSCG00000013110	TMEM109	cyan	-0.337063	0.158194	0.961843	5.32585e-11
ENSSSCG00000029521	CD82	cyan	-0.334724	0.161282	0.953013	3.03219e-10
ENSSSCG00000022618	CMTM8	cyan	-0.330957	0.166344	0.772178	0.000107174
ENSSSCG00000036261	CROCC2	cyan	-0.329777	0.167952	0.907529	8.17989e-08
ENSSSCG00000010175	GNPAT	cyan	0.328928	0.169115	-0.923224	1.77749e-08
ENSSSCG00000047555		cyan	-0.328831	0.169249	0.382652	0.105891
ENSSSCG00000038940	GNPDA1	cyan	-0.328654	0.169493	0.653872	0.00239224
ENSSSCG00000002557	NUDT14	cyan	-0.32813	0.170215	0.926496	1.24149e-08
ENSSSCG00000029391	PLSCR3	cyan	-0.327255	0.171425	0.919244	2.69402e-08
ENSSSCG00000047051		cyan	0.326726	0.172159	-0.784314	7.03806e-05
ENSSSCG00000015086	TMPRSS4	cyan	-0.324583	0.175155	0.549909	0.014718
ENSSSCG00000014076	FAM169A	cyan	0.323161	0.177164	-0.766482	0.000129443
ENSSSCG00000010298	CFAP70	cyan	0.322987	0.17741	-0.819602	1.75348e-05
ENSSSCG00000032367	CEBPD	cyan	-0.320209	0.18138	0.88855	3.74106e-07
ENSSSCG00000050196		cyan	0.320027	0.181644	-0.686255	0.00117673
ENSSSCG00000013237	SPI1	cyan	-0.31997	0.181726	0.697453	0.000901902
ENSSSCG00000005661	ENDOG	cyan	-0.318344	0.18408	0.684586	0.00122313
ENSSSCG00000038865		cyan	-0.315224	0.188656	0.647588	0.00271992
ENSSSCG00000005459	ECPAS	cyan	0.314566	0.189631	-0.898858	1.70002e-07
ENSSSCG00000047792		cyan	0.313709	0.190906	-0.572956	0.0103414
ENSSSCG00000010104		cyan	-0.310368	0.195929	0.801388	3.71712e-05
ENSSSCG00000031757	CARS2	cyan	-0.306696	0.201551	0.865011	1.75478e-06
ENSSSCG00000031360	ADO	cyan	-0.305697	0.203099	0.894016	2.48712e-07
ENSSSCG00000050926		cyan	0.30501	0.204166	-0.840971	6.48561e-06
ENSSSCG00000033685	NOXA1	cyan	-0.304515	0.20494	0.897649	1.87278e-07
ENSSSCG00000008607		cyan	0.300852	0.210715	-0.505104	0.0273936
ENSSSCG00000006171	CRISPLD1	cyan	-0.300314	0.211572	0.730014	0.000387731
ENSSSCG00000010212		cyan	0.298545	0.214407	-0.885994	4.49575e-07
ENSSSCG00000035152	TEF	cyan	-0.295816	0.218831	0.859508	2.41671e-06
ENSSSCG00000014988	MMP13	cyan	-0.295219	0.219805	0.657325	0.00222655
ENSSSCG00000012840	CD151	cyan	-0.294646	0.220744	0.929682	8.61345e-09
ENSSSCG00000007189	SDCBP2	cyan	-0.294422	0.221112	0.847177	4.72793e-06
ENSSSCG00000009642	STC1	cyan	0.29037	0.227831	-0.752297	0.0002027
ENSSSCG00000004990	LRFN5	cyan	-0.290121	0.228249	0.587996	0.00810198
ENSSSCG00000012903	PITPNM1	cyan	-0.289866	0.228677	0.730388	0.000383735
ENSSSCG00000018053	MED9	cyan	-0.287026	0.233474	0.940748	2.08761e-09
ENSSSCG00000043065		cyan	0.286822	0.233822	-0.57373	0.0102152
ENSSSCG00000007435	PLTP	cyan	-0.285367	0.236308	0.63567	0.00344359
ENSSSCG00000044075		cyan	-0.284493	0.23781	0.512637	0.024813
ENSSSCG00000032846	BPNT2	cyan	0.284231	0.23826	-0.884911	4.85343e-07
ENSSSCG00000033815	SST	cyan	0.283645	0.239273	-0.616077	0.00497446
ENSSSCG00000014058	CLTB	cyan	-0.282407	0.241418	0.904779	1.03937e-07
ENSSSCG00000032265	TLE5	cyan	-0.281781	0.242507	0.896337	2.07729e-07
ENSSSCG00000014831	PAAF1	cyan	0.279896	0.245808	-0.579792	0.00926868
ENSSSCG00000033315		cyan	0.279012	0.247364	-0.596274	0.00704864
ENSSSCG00000034540		cyan	0.278802	0.247735	-0.743755	0.000261896
ENSSSCG00000031493	CYBA	cyan	-0.278679	0.247953	0.873701	1.02797e-06
ENSSSCG00000000864	CHPT1	cyan	-0.278296	0.248631	0.605218	0.00603862
ENSSSCG00000033043	SHANK2	cyan	-0.277434	0.250159	0.659945	0.00210735
ENSSSCG00000007391	MATN4	cyan	-0.27678	0.251325	0.891168	3.08506e-07
ENSSSCG00000038693	RAB19	cyan	0.276507	0.251812	-0.700994	0.000827141
ENSSSCG00000013033	BAD	cyan	-0.276063	0.252605	0.845908	5.04936e-06
ENSSSCG00000019977		cyan	-0.275664	0.25332	0.780492	8.05736e-05
ENSSSCG00000041313		cyan	0.275658	0.253331	-0.367098	0.122088
ENSSSCG00000017497	ERBB2	cyan	-0.275352	0.25388	0.752377	0.000202207
ENSSSCG00000017788	TP53I13	cyan	-0.274941	0.254618	0.944383	1.23422e-09
ENSSSCG00000001837	FANCI	cyan	0.274599	0.255232	-0.851746	3.71289e-06
ENSSSCG00000010133	ARVCF	cyan	-0.274034	0.256251	0.927071	1.16364e-08
ENSSSCG00000005627	AK1	cyan	-0.273939	0.256424	0.874781	9.59226e-07
ENSSSCG00000045959		cyan	0.272516	0.259	-0.712792	0.000614466
ENSSSCG00000048411		cyan	0.271307	0.261204	-0.842215	6.09419e-06
ENSSSCG00000028139	CCDC154	cyan	-0.270077	0.263457	0.746319	0.00024276
ENSSSCG00000032262	IDUA	cyan	-0.269219	0.265036	0.843241	5.78669e-06
ENSSSCG00000028725	TMEM102	cyan	-0.268281	0.266769	0.675263	0.00151143
ENSSSCG00000040401	EEF1A2	cyan	-0.267974	0.267338	0.887499	4.03682e-07
ENSSSCG00000032116	OGFOD3	cyan	-0.266801	0.269517	0.835872	8.32737e-06
ENSSSCG00000039873	DCXR	cyan	-0.266517	0.270047	0.932628	6.04808e-09
ENSSSCG00000031957	RIMS2	cyan	0.265819	0.271352	-0.858643	2.5384e-06
ENSSSCG00000008113	MRPS5	cyan	0.26527	0.272381	-0.656748	0.00225358
ENSSSCG00000026360	CLGN	cyan	0.264042	0.274689	-0.592868	0.00746758
ENSSSCG00000011417	DCAF1	cyan	0.263658	0.275413	-0.781579	7.75534e-05
ENSSSCG00000030547	PIP5K1A	cyan	0.263318	0.276055	-0.758603	0.000166674
ENSSSCG00000013282	ACCS	cyan	-0.263009	0.276641	0.884304	5.06453e-07
ENSSSCG00000009458		cyan	-0.263005	0.276648	0.71772	0.000540416
ENSSSCG00000014408	PLAC8L1	cyan	0.262257	0.278067	-0.73244	0.000362396
ENSSSCG00000035161	TMEM237	cyan	0.261874	0.278795	-0.770167	0.000114629
ENSSSCG00000046476		cyan	0.261851	0.27884	-0.52248	0.0217337
ENSSSCG00000019823	ssc-mir-23a	cyan	0.261477	0.279551	-0.706067	0.000729155
ENSSSCG00000003393	TMEM201	cyan	-0.259134	0.284039	0.656099	0.00228427
ENSSSCG00000015549	RNASEL	cyan	0.257277	0.287627	-0.496267	0.0306832
ENSSSCG00000016863	OXCT1	cyan	0.257151	0.287872	-0.60166	0.00642512
ENSSSCG00000050035		cyan	0.255114	0.29184	-0.575072	0.00999921
ENSSSCG00000011806	MASP1	cyan	0.25453	0.292986	-0.422764	0.0713364
ENSSSCG00000016773	ZNF282	cyan	-0.254201	0.293631	0.919374	2.65863e-08
ENSSSCG00000046569		cyan	-0.253977	0.294072	0.486839	0.0345242
ENSSSCG00000011134	RBM17	cyan	-0.252608	0.296771	0.821373	1.62284e-05
ENSSSCG00000006100	VIRMA	cyan	0.251686	0.298596	-0.841662	6.26541e-06
ENSSSCG00000024912	WDR5	cyan	-0.250675	0.300606	0.933279	5.58134e-09
ENSSSCG00000050463		cyan	0.246004	0.31	-0.412853	0.0789588
ENSSSCG00000022568	TMPRSS3	cyan	-0.24583	0.310354	0.623063	0.00437508
ENSSSCG00000003332	SDF4	cyan	-0.245668	0.310684	0.852805	3.50665e-06
ENSSSCG00000041714		cyan	0.244365	0.313338	-0.332678	0.164018
ENSSSCG00000044294		cyan	-0.243037	0.316057	0.65731	0.00222728
ENSSSCG00000025179	NECAP1	cyan	0.241623	0.31897	-0.482571	0.0363807
ENSSSCG00000027915	SNORD4B	cyan	0.240328	0.321649	-0.566821	0.0113875
ENSSSCG00000045781		cyan	-0.239144	0.324112	0.463372	0.0457056
ENSSSCG00000014250	C5orf63	cyan	0.238413	0.325638	-0.772188	0.000107137
ENSSSCG00000000708	TNFRSF1A	cyan	0.238227	0.326027	-0.498289	0.0299047
ENSSSCG00000016887	ITGA2	cyan	0.237806	0.326909	-0.466161	0.0442478
ENSSSCG00000043408		cyan	0.236489	0.329674	-0.638	0.00329088
ENSSSCG00000009180	TRMT10A	cyan	0.236344	0.329979	-0.787264	6.32895e-05
ENSSSCG00000025870	HEPACAM2	cyan	0.235415	0.33194	-0.54685	0.0153962
ENSSSCG00000011366	SLC25A20	cyan	0.234175	0.334568	-0.713762	0.000599243
ENSSSCG00000037779	CAPN10	cyan	-0.232738	0.337627	0.941277	1.93784e-09
ENSSSCG00000051625		cyan	0.232541	0.338048	-0.638274	0.00327327
ENSSSCG00000006694		cyan	0.231518	0.340238	-0.656675	0.00225699
ENSSSCG00000037639	TIMMDC1	cyan	0.230226	0.343014	-0.863234	1.94883e-06
ENSSSCG00000027423	TMEM53	cyan	-0.229265	0.345088	0.867242	1.53519e-06
ENSSSCG00000022655	PTGES2	cyan	-0.228746	0.346213	0.748862	0.000224967
ENSSSCG00000017909	CHRNE	cyan	-0.227304	0.349345	0.614412	0.00512685
ENSSSCG00000017883	GGT6	cyan	-0.226165	0.35183	0.88946	3.50043e-07
ENSSSCG00000050167		cyan	-0.224611	0.355237	0.716494	0.000558098
ENSSSCG00000016367	RNPEPL1	cyan	-0.223544	0.357587	0.919152	2.71938e-08
ENSSSCG00000014049	UNC5A	cyan	-0.221917	0.361188	0.474883	0.0399193
ENSSSCG00000009562	GRK1	cyan	0.219972	0.365521	-0.479954	0.037557
ENSSSCG00000006524	THBS3	cyan	0.219875	0.365736	-0.630698	0.00378915
ENSSSCG00000012915		cyan	-0.219458	0.366671	0.783379	7.27668e-05
ENSSSCG00000003762	ADGRL4	cyan	0.218892	0.367938	-0.683133	0.00126475
ENSSSCG00000022857	TFF3	cyan	-0.216566	0.373176	0.775673	9.51978e-05
ENSSSCG00000039516	LRRC47	cyan	-0.216502	0.373321	0.837147	7.82894e-06
ENSSSCG00000031132	SIVA1	cyan	-0.21354	0.380053	0.907088	8.50469e-08
ENSSSCG00000050208		cyan	0.210843	0.386243	-0.518071	0.0230736
ENSSSCG00000023619	SLC12A9	cyan	-0.210113	0.387928	0.838947	7.16958e-06
ENSSSCG00000004648	FAM227B	cyan	0.209051	0.390385	-0.484122	0.0356973
ENSSSCG00000008531		cyan	-0.206584	0.396128	0.736874	0.000319701
ENSSSCG00000044926		cyan	0.206435	0.396478	-0.712614	0.000617294
ENSSSCG00000048286		cyan	-0.205386	0.398933	0.459555	0.047759
ENSSSCG00000048711		cyan	0.20267	0.405335	-0.566386	0.0114647
ENSSSCG00000011949	CEP97	cyan	0.201123	0.409006	-0.730118	0.00038662
ENSSSCG00000008428	MSH2	cyan	0.200894	0.409551	-0.621467	0.00450648
ENSSSCG00000022999	ZNF232	cyan	0.198862	0.414402	-0.534042	0.0185107
ENSSSCG00000021890	GNB1	cyan	-0.191545	0.432127	0.851237	3.81579e-06
ENSSSCG00000037341	RNF220	cyan	-0.189731	0.436581	0.913081	4.92679e-08
ENSSSCG00000010878		cyan	0.188695	0.439136	-0.548326	0.0150659
ENSSSCG00000008970	CDKL2	cyan	0.186773	0.443897	-0.788524	6.04519e-05
ENSSSCG00000018044	ALDH3A1	cyan	-0.184956	0.448421	0.845298	5.21024e-06
ENSSSCG00000047656		cyan	-0.182573	0.454392	0.466481	0.0440831
ENSSSCG00000005930	SLC45A4	cyan	-0.178465	0.464779	0.839067	7.12731e-06
ENSSSCG00000007563	BRAT1	cyan	-0.176744	0.469167	0.787158	6.35327e-05
ENSSSCG00000050498	PURA	cyan	-0.176334	0.470213	0.811753	2.44763e-05
ENSSSCG00000013737	RNASEH2A	cyan	-0.175873	0.471396	0.611676	0.0053855
ENSSSCG00000009233	GPAT3	cyan	-0.175797	0.471589	0.416544	0.076053
ENSSSCG00000027045	LRRC56	cyan	-0.172025	0.481301	0.608747	0.00567413
ENSSSCG00000002337	ZFYVE1	cyan	-0.169891	0.48684	0.709468	0.000669089
ENSSSCG00000009434	RGCC	cyan	0.168985	0.4892	-0.514574	0.0241816
ENSSSCG00000049483		cyan	0.162909	0.505176	-0.612148	0.00534008
ENSSSCG00000048452		cyan	-0.161741	0.508274	0.48177	0.036738
ENSSSCG00000017205	SAP30BP	cyan	-0.160722	0.510984	0.632298	0.00367503
ENSSSCG00000017745	UTP6	cyan	0.160312	0.512077	-0.823642	1.46772e-05
ENSSSCG00000009112	SEC24D	cyan	0.1576	0.519335	-0.833576	9.29391e-06
ENSSSCG00000040086	YTHDF1	cyan	-0.155615	0.524675	0.664965	0.00189367
ENSSSCG00000010312	PLAU	cyan	0.155538	0.524884	-0.481694	0.036772
ENSSSCG00000021750	MEX3D	cyan	-0.153336	0.530841	0.887468	4.04608e-07
ENSSSCG00000035388	C16orf46	cyan	0.151289	0.536406	-0.600028	0.00660911
ENSSSCG00000051097		cyan	0.14923	0.542028	-0.774548	9.89232e-05
ENSSSCG00000048191		cyan	-0.148465	0.544126	0.434407	0.0630976
ENSSSCG00000010756	MGMT	cyan	-0.148358	0.544418	0.682328	0.00128833
ENSSSCG00000031791	ARF4	cyan	-0.147484	0.546819	0.662721	0.00198685
ENSSSCG00000023423	UBALD2	cyan	-0.146039	0.550797	0.843049	5.84307e-06
ENSSSCG00000051504		cyan	0.142471	0.560677	-0.516259	0.0236425
ENSSSCG00000007465	B4GALT5	cyan	-0.141578	0.56316	0.43889	0.0601237
ENSSSCG00000014884		cyan	0.138039	0.573053	-0.616146	0.00496824
ENSSSCG00000044376		cyan	-0.13654	0.577267	0.464457	0.0451342
ENSSSCG00000025334	POU4F1	cyan	-0.135715	0.579592	0.622561	0.00441604
ENSSSCG00000008034	NOXO1	cyan	-0.135505	0.580183	0.53286	0.0188218
ENSSSCG00000011215	OXSM	cyan	0.135325	0.580693	-0.635906	0.00342786
ENSSSCG00000014148	TMEM161B	cyan	-0.134354	0.583434	0.643518	0.00295134
ENSSSCG00000021216	TCEANC2	cyan	0.131229	0.592301	-0.745579	0.000248162
ENSSSCG00000018042	SLC47A2	cyan	-0.129815	0.596329	0.865086	1.74704e-06
ENSSSCG00000002268	AKAP5	cyan	0.128923	0.598878	-0.518217	0.0230282
ENSSSCG00000038856	TRIM8	cyan	-0.128028	0.601439	0.771572	0.000109375
ENSSSCG00000044179		cyan	0.127234	0.603713	0.539791	0.0170561
ENSSSCG00000003913	MAST2	cyan	-0.126662	0.605357	0.797834	4.26624e-05
ENSSSCG00000029066	IDI1	cyan	0.126064	0.607073	-0.431533	0.065062
ENSSSCG00000002716	MLKL	cyan	0.123728	0.613805	-0.562346	0.0122029
ENSSSCG00000045205		cyan	0.123033	0.615813	-0.465493	0.0445937
ENSSSCG00000004236	PKIB	cyan	0.120843	0.622158	-0.656431	0.0022685
ENSSSCG00000013714		cyan	0.119589	0.625801	-0.440191	0.059281
ENSSSCG00000017052	ADAM19	cyan	-0.117673	0.631388	0.477156	0.0388467
ENSSSCG00000051093		cyan	0.116482	0.634868	-0.509025	0.0260254
ENSSSCG00000049300		cyan	-0.114906	0.639487	0.544763	0.0158728
ENSSSCG00000049961		cyan	0.11464	0.640266	-0.529863	0.0196286
ENSSSCG00000004651	GALK2	cyan	0.111334	0.649998	-0.487696	0.0341604
ENSSSCG00000021161	CKS2	cyan	0.110508	0.652438	-0.559031	0.0128367
ENSSSCG00000040416		cyan	-0.106784	0.663484	0.62896	0.00391649
ENSSSCG00000000700	ACRBP	cyan	-0.106541	0.664207	0.56651	0.0114427
ENSSSCG00000032578	TNFRSF17	cyan	0.106223	0.665152	-0.588568	0.00802536
ENSSSCG00000048237		cyan	0.0971943	0.692225	-0.636716	0.00337435
ENSSSCG00000004639	USP8	cyan	-0.0896443	0.715142	-0.600663	0.00653702
ENSSSCG00000014009	CNOT6	cyan	-0.0859678	0.726388	0.393308	0.0957276
ENSSSCG00000016532	WDR91	cyan	-0.072432	0.768241	0.795313	4.69654e-05
ENSSSCG00000009672		cyan	0.0720594	0.769402	-0.654014	0.0023852
ENSSSCG00000004120	SHPRH	cyan	0.071615	0.770788	-0.556432	0.0133519
ENSSSCG00000047326		cyan	0.0712155	0.772034	-0.590052	0.00782909
ENSSSCG00000006540	PBXIP1	cyan	-0.0702143	0.77516	0.39105	0.0978191
ENSSSCG00000010522	ANKRD2	cyan	-0.0697082	0.776742	0.459718	0.0476701
ENSSSCG00000027515		cyan	-0.0653595	0.790364	0.673266	0.00158002
ENSSSCG00000012906	CABP4	cyan	-0.0653227	0.79048	0.567763	0.0112216
ENSSSCG00000011329	CCDC12	cyan	0.0653071	0.790529	-0.754202	0.000191177
ENSSSCG00000001775	MINAR1	cyan	0.0627669	0.798513	0.465706	0.0444832
ENSSSCG00000023762	TRPM2	cyan	-0.060575	0.805419	0.525272	0.0209178
ENSSSCG00000012654		cyan	0.0581377	0.813113	-0.693435	0.000993525
ENSSSCG00000006471	ISG20L2	cyan	0.0549984	0.823049	-0.615497	0.00502708
ENSSSCG00000049517		cyan	-0.0546626	0.824113	0.691059	0.0010513
ENSSSCG00000008374	B3GNT2	cyan	-0.0533277	0.828346	-0.441824	0.0582354
ENSSSCG00000045583		cyan	-0.0511868	0.835146	0.413368	0.0785488
ENSSSCG00000031851	CBR2	cyan	-0.0501654	0.838394	0.614052	0.00516032
ENSSSCG00000038037	SPTY2D1OS	cyan	-0.0472518	0.847672	-0.538548	0.0173627
ENSSSCG00000021397	PODXL2	cyan	-0.0468276	0.849024	0.691615	0.00103753
ENSSSCG00000034785		cyan	-0.0442391	0.857286	0.561209	0.0124174
ENSSSCG00000004004	ZNF584	cyan	0.0422896	0.863518	-0.670456	0.00168095
ENSSSCG00000016541	SLC35B4	cyan	0.0376432	0.878401	-0.611578	0.00539495
ENSSSCG00000030539	KLK15	cyan	-0.0365833	0.881801	-0.543661	0.0161293
ENSSSCG00000004708	TUBGCP4	cyan	0.0351375	0.886443	-0.657778	0.00220555
ENSSSCG00000044656		cyan	0.0336309	0.891284	0.262091	0.278383
ENSSSCG00000032392		cyan	-0.0316496	0.897656	0.492667	0.0321086
ENSSSCG00000028926		cyan	0.0294159	0.904846	0.413078	0.0787797
ENSSSCG00000042909		cyan	-0.0270842	0.91236	-0.379997	0.10854
ENSSSCG00000016331	RAMP1	cyan	-0.0228212	0.926115	0.683806	0.00124532
ENSSSCG00000020823	BSCL2	cyan	-0.0225483	0.926996	0.742516	0.000271597
ENSSSCG00000008842	KIT	cyan	0.0141703	0.954086	0.546069	0.0155732
ENSSSCG00000012157	PHKA2	cyan	-0.0083048	0.973082	-0.506262	0.0269839
ENSSSCG00000046603		cyan	0.00674136	0.978149	-0.501443	0.0287213
ENSSSCG00000020771	INHA	cyan	-0.00197427	0.9936	0.531108	0.0192902
