# Supplementary material for: Altered hair root gene expression profiles highlight calcium signaling and lipid metabolism pathways to be associated with curly hair initiation and maintenance in Mangalitza pigs
Source: Front Genet. 2023 Jun 7;14:1184015. doi: 10.3389/fgene.2023.1184015 (PMC10282778; doi:10.3389/fgene.2023.1184015)
Supplement: Supplementary file 8 [file Table4.XLSX]

## Sheet: Sheet1
Table S4 List of predictive protein networks of CYP4F3 or TRPM2 at their centers. Predictive protein networks with the closest related nodes were extracted from STRING analysis.
Network center	Ensembl ID	Gene name	Description
CYP4F3	ENSSSCG00000000891	LTA4H	leukotriene A4 hydrolase [Source:VGNC Symbol;Acc:VGNC:89882]
CYP4F3	ENSSSCG00000001901	CYP1A2	cytochrome P450 family 1 subfamily A member 2 [Source:VGNC Symbol;Acc:VGNC:103346]
CYP4F3	ENSSSCG00000001906	CYP1A1	cytochrome P450 family 1 subfamily A member 1 [Source:VGNC Symbol;Acc:VGNC:103347]
CYP4F3	ENSSSCG00000003006	CYP2B22	cytochrome P450 2B22 [Source:NCBI gene (formerly Entrezgene);Acc:403104]
CYP4F3	ENSSSCG00000003754	ENSSSCG00000003754	cytochrome P450 family 4 subfamily A member 90 [Source:VGNC Symbol;Acc:VGNC:103358]
CYP4F3	ENSSSCG00000003812	PGM1	phosphoglucomutase 1 [Source:VGNC Symbol;Acc:VGNC:91355]
CYP4F3	ENSSSCG00000003824	nan	nan
CYP4F3	ENSSSCG00000003825	CYP2J34	cytochrome P450 family 2 subfamily J member 34 [Source:NCBI gene (formerly Entrezgene);Acc:100524750]
CYP4F3	ENSSSCG00000005533	PTGS1	prostaglandin-endoperoxide synthase 1 [Source:VGNC Symbol;Acc:VGNC:91958]
CYP4F3	ENSSSCG00000006238	CYP7A1	cytochrome P450 family 7 subfamily A member 1 [Source:VGNC Symbol;Acc:VGNC:98774]
CYP4F3	ENSSSCG00000006648	CTSS	cathepsin S [Source:VGNC Symbol;Acc:VGNC:87079]
CYP4F3	ENSSSCG00000006719	ENSSSCG00000006719	hydroxy-delta-5-steroid dehydrogenase, 3 beta- and steroid delta-isomerase 1 [Source:NCBI gene (formerly Entrezgene);Acc:445539]
CYP4F3	ENSSSCG00000026893	ENSSSCG00000026893	nan
CYP4F3	ENSSSCG00000007436	MMP9	matrix metallopeptidase 9 [Source:VGNC Symbol;Acc:VGNC:96422]
CYP4F3	ENSSSCG00000008311	CYP26B1	cytochrome P450 family 26 subfamily B member 1 [Source:VGNC Symbol;Acc:VGNC:103374]
CYP4F3	ENSSSCG00000022724	ENSSSCG00000022724	nan
CYP4F3	ENSSSCG00000009151	CYP2U1	cytochrome P450 family 2 subfamily U member 1 [Source:VGNC Symbol;Acc:VGNC:103357]
CYP4F3	ENSSSCG00000009182	ENSSSCG00000009182	alcohol dehydrogenase 1C (class I), gamma polypeptide [Source:NCBI gene (formerly Entrezgene);Acc:100512615]
CYP4F3	ENSSSCG00000009184	ADH4	alcohol dehydrogenase 4 (class II), pi polypeptide [Source:NCBI gene (formerly Entrezgene);Acc:100513366]
CYP4F3	ENSSSCG00000009185	ADH5	alcohol dehydrogenase 5 (class III), chi polypeptide [Source:NCBI gene (formerly Entrezgene);Acc:100513555]
CYP4F3	ENSSSCG00000009666	EPHX2	epoxide hydrolase 2 [Source:NCBI gene (formerly Entrezgene);Acc:414425]
CYP4F3	ENSSSCG00000009889	ALDH2	aldehyde dehydrogenase 2 family member [Source:NCBI gene (formerly Entrezgene);Acc:733685]
CYP4F3	ENSSSCG00000010404	ALOX5	arachidonate 5-lipoxygenase [Source:VGNC Symbol;Acc:VGNC:85266]
CYP4F3	ENSSSCG00000010474	CYP26C1	cytochrome P450 family 26 subfamily C member 1 [Source:VGNC Symbol;Acc:VGNC:103373]
CYP4F3	ENSSSCG00000010475	CYP26A1	cytochrome P450 family 26 subfamily A member 1 [Source:VGNC Symbol;Acc:VGNC:103370]
CYP4F3	ENSSSCG00000010546	ENSSSCG00000010546	cytochrome P450 family 2 subfamily C member 33 [Source:NCBI gene (formerly Entrezgene);Acc:403107]
CYP4F3	ENSSSCG00000010591	CYP17A1	cytochrome P450 family 17 subfamily A member 1 [Source:VGNC Symbol;Acc:VGNC:103368]
CYP4F3	ENSSSCG00000010780	CYP2E1	cytochrome P450 family 2 subfamily E member 1 [Source:VGNC Symbol;Acc:VGNC:103356]
CYP4F3	ENSSSCG00000010853	EPHX1	epoxide hydrolase 1 [Source:NCBI gene (formerly Entrezgene);Acc:397639]
CYP4F3	ENSSSCG00000012053	CBR3	carbonyl reductase 3 [Source:VGNC Symbol;Acc:VGNC:86228]
CYP4F3	ENSSSCG00000028501	ENSSSCG00000028501	aldehyde dehydrogenase 3 family member B1 [Source:NCBI gene (formerly Entrezgene);Acc:100739347]
CYP4F3	ENSSSCG00000026349	ALDH3B2	aldehyde dehydrogenase 3 family member B2 [Source:HGNC Symbol;Acc:HGNC:411]
CYP4F3	ENSSSCG00000032765	ENSSSCG00000032765	nan
CYP4F3	ENSSSCG00000029675	MMP8	matrix metallopeptidase 8 [Source:VGNC Symbol;Acc:VGNC:90280]
CYP4F3	ENSSSCG00000015616	HSD11B1	hydroxysteroid 11-beta dehydrogenase 1 [Source:VGNC Symbol;Acc:VGNC:88983]
CYP4F3	ENSSSCG00000023716	TNFAIP6	TNF alpha induced protein 6 [Source:VGNC Symbol;Acc:VGNC:95544]
CYP4F3	ENSSSCG00000016721	DBNL	drebrin like [Source:VGNC Symbol;Acc:VGNC:87166]
CYP4F3	ENSSSCG00000017759	ALDOC	aldolase, fructose-bisphosphate C [Source:VGNC Symbol;Acc:VGNC:85246]
CYP4F3	ENSSSCG00000017923	ALOX15	arachidonate 15-lipoxygenase [Source:NCBI gene (formerly Entrezgene);Acc:396971]
CYP4F3	ENSSSCG00000017923	ALOX15	arachidonate 15-lipoxygenase [Source:NCBI gene (formerly Entrezgene);Acc:396971]
CYP4F3	ENSSSCG00000017978	ALOX15B	arachidonate 15-lipoxygenase type B [Source:VGNC Symbol;Acc:VGNC:98972]
CYP4F3	ENSSSCG00000018041	ALDH3A2	aldehyde dehydrogenase 3 family member A2 [Source:VGNC Symbol;Acc:VGNC:85239]
CYP4F3	ENSSSCG00000018044	ALDH3A1	aldehyde dehydrogenase 3 family member A1 [Source:VGNC Symbol;Acc:VGNC:85238]
CYP4F3	ENSSSCG00000003825	CYP2J34	cytochrome P450 family 2 subfamily J member 34 [Source:NCBI gene (formerly Entrezgene);Acc:100524750]
CYP4F3	ENSSSCG00000024213	nan	nan
CYP4F3	ENSSSCG00000027031	nan	nan
CYP4F3	ENSSSCG00000035347	CYP2C42	cytochrome P450 C42 [Source:NCBI gene (formerly Entrezgene);Acc:403111]
CYP4F3	ENSSSCG00000023264	IDH1	isocitrate dehydrogenase (NADP(+)) 1 [Source:HGNC Symbol;Acc:HGNC:5382]
CYP4F3	ENSSSCG00000029606	AOX1	aldehyde oxidase 1 [Source:NCBI gene (formerly Entrezgene);Acc:100523701]
CYP4F3	ENSSSCG00000028488	LTC4S	leukotriene C4 synthase [Source:VGNC Symbol;Acc:VGNC:89890]
CYP4F3	ENSSSCG00000023320	CYP3A29	cytochrome P450 family 3 subfamily A member 22 [Source:NCBI gene (formerly Entrezgene);Acc:100144468]
CYP4F3	ENSSSCG00000020969	nan	nan
CYP4F3	ENSSSCG00000025578	ALDH1A2	aldehyde dehydrogenase 1 family member A2 [Source:VGNC Symbol;Acc:VGNC:97878]
CYP4F3	ENSSSCG00000025537	PTPN6	protein tyrosine phosphatase non-receptor type 6 [Source:VGNC Symbol;Acc:VGNC:91982]
CYP4F3	ENSSSCG00000039276	UGT2B31	UDP-glucuronosyltransferase 2B31 [Source:NCBI gene (formerly Entrezgene);Acc:100514063]
CYP4F3	ENSSSCG00000029879	LTF	lactotransferrin [Source:VGNC Symbol;Acc:VGNC:89891]
CYP4F3	ENSSSCG00000023280	SULT2B1	sulfotransferase family 2B member 1 [Source:VGNC Symbol;Acc:VGNC:93614]
CYP4F3	ENSSSCG00000028996	ALDH1A1	aldehyde dehydrogenase 1 family member A1 [Source:VGNC Symbol;Acc:VGNC:97877]
CYP4F3	ENSSSCG00000025630	nan	nan
TRPM2	ENSSSCG00000010772	ADAM8	ADAM metallopeptidase domain 8 [Source:VGNC Symbol;Acc:VGNC:97866]
TRPM2	ENSSSCG00000028277	ENSSSCG00000028277	nan
TRPM2	ENSSSCG00000036331	ENSSSCG00000036331	amylase, alpha 2B (pancreatic) [Source:NCBI gene (formerly Entrezgene);Acc:397397]
TRPM2	ENSSSCG00000004646	ATP8B4	ATPase phospholipid transporting 8B4 (putative) [Source:VGNC Symbol;Acc:VGNC:103036]
TRPM2	ENSSSCG00000028359	BST1	bone marrow stromal cell antigen 1 [Source:VGNC Symbol;Acc:VGNC:85896]
TRPM2	ENSSSCG00000006800	CD53	CD53 molecule [Source:VGNC Symbol;Acc:VGNC:86421]
TRPM2	ENSSSCG00000004193	ENPP1	ectonucleotide pyrophosphatase/phosphodiesterase 1 [Source:VGNC Symbol;Acc:VGNC:87708]
TRPM2	ENSSSCG00000021108	nan	nan
TRPM2	ENSSSCG00000022360	nan	nan
TRPM2	ENSSSCG00000023922	nan	nan
TRPM2	ENSSSCG00000006357	FCER1G	Fc fragment of IgE receptor Ig [Source:VGNC Symbol;Acc:VGNC:88061]
TRPM2	ENSSSCG00000017156	GAA	alpha glucosidase [Source:VGNC Symbol;Acc:VGNC:88293]
TRPM2	ENSSSCG00000038423	GLA	galactosidase alpha [Source:VGNC Symbol;Acc:VGNC:88474]
TRPM2	ENSSSCG00000009827	HVCN1	hydrogen voltage gated channel 1 [Source:VGNC Symbol;Acc:VGNC:89009]
TRPM2	ENSSSCG00000039909	ICAM2	intercellular adhesion molecule 2 [Source:NCBI gene (formerly Entrezgene);Acc:414387]
TRPM2	ENSSSCG00000013649	ICAM3	intercellular adhesion molecule 3 [Source:VGNC Symbol;Acc:VGNC:89020]
TRPM2	ENSSSCG00000007797	ITGAL	integrin subunit alpha L [Source:VGNC Symbol;Acc:VGNC:89240]
TRPM2	ENSSSCG00000007754	ITGAM	integrin subunit alpha M [Source:HGNC Symbol;Acc:HGNC:6149]
TRPM2	ENSSSCG00000016027	ITGAV	integrin subunit alpha V [Source:VGNC Symbol;Acc:VGNC:96380]
TRPM2	ENSSSCG00000025133	ITGB2	integrin subunit beta 2 [Source:VGNC Symbol;Acc:VGNC:89242]
TRPM2	ENSSSCG00000015256	JAM3	junctional adhesion molecule 3 [Source:VGNC Symbol;Acc:VGNC:89277]
TRPM2	ENSSSCG00000012604	LAMP2	lysosomal associated membrane protein 2 [Source:VGNC Symbol;Acc:VGNC:89628]
TRPM2	ENSSSCG00000028350	LCAT	lecithin-cholesterol acyltransferase [Source:VGNC Symbol;Acc:VGNC:89656]
TRPM2	ENSSSCG00000001556	MAPK14	mitogen-activated protein kinase 14 [Source:VGNC Symbol;Acc:VGNC:90000]
TRPM2	ENSSSCG00000021569	MMP25	matrix metallopeptidase 25 [Source:VGNC Symbol;Acc:VGNC:90276]
TRPM2	ENSSSCG00000007436	MMP9	matrix metallopeptidase 9 [Source:VGNC Symbol;Acc:VGNC:96422]
TRPM2	ENSSSCG00000012131	MOSPD2	motile sperm domain containing 2 [Source:VGNC Symbol;Acc:VGNC:90314]
TRPM2	ENSSSCG00000007722	NCF1	neutrophil cytosolic factor 1 [Source:NCBI gene (formerly Entrezgene);Acc:100134857]
TRPM2	ENSSSCG00000015559	NCF2	neutrophil cytosolic factor 2 [Source:VGNC Symbol;Acc:VGNC:90607]
TRPM2	ENSSSCG00000000137	NCF4	neutrophil cytosolic factor 4 [Source:VGNC Symbol;Acc:VGNC:90608]
TRPM2	ENSSSCG00000000647	OLR1	oxidized low density lipoprotein receptor 1 [Source:VGNC Symbol;Acc:VGNC:91038]
TRPM2	ENSSSCG00000022405	P2RX1	purinergic receptor P2X 1 [Source:VGNC Symbol;Acc:VGNC:91118]
TRPM2	ENSSSCG00000010032	PISD	phosphatidylserine decarboxylase [Source:VGNC Symbol;Acc:VGNC:91462]
TRPM2	ENSSSCG00000023351	PLA2G4A	phospholipase A2 group IVA [Source:VGNC Symbol;Acc:VGNC:91495]
TRPM2	ENSSSCG00000010312	PLAU	plasminogen activator, urokinase [Source:VGNC Symbol;Acc:VGNC:91511]
TRPM2	ENSSSCG00000032434	PLAUR	plasminogen activator, urokinase receptor [Source:VGNC Symbol;Acc:VGNC:91512]
TRPM2	ENSSSCG00000011750	PLD1	phospholipase D1 [Source:VGNC Symbol;Acc:VGNC:91525]
TRPM2	ENSSSCG00000021944	RAC2	Rac family small GTPase 2 [Source:VGNC Symbol;Acc:VGNC:92048]
TRPM2	ENSSSCG00000022080	RHOA	ras homolog family member A [Source:VGNC Symbol;Acc:VGNC:92284]
TRPM2	ENSSSCG00000004643	SLC27A2	solute carrier family 27 member 2 [Source:VGNC Symbol;Acc:VGNC:93036]
TRPM2	ENSSSCG00000038735	SNAP23	synaptosome associated protein 23 [Source:VGNC Symbol;Acc:VGNC:93277]
TRPM2	ENSSSCG00000026985	SNAP25	synaptosome associated protein 25 [Source:VGNC Symbol;Acc:VGNC:95509]
TRPM2	ENSSSCG00000017164	ENSSSCG00000017164	TIMP metallopeptidase inhibitor 2 [Source:VGNC Symbol;Acc:VGNC:93995]
TRPM2	ENSSSCG00000023762	TRPM2	transient receptor potential cation channel subfamily M member 2 [Source:VGNC Symbol;Acc:VGNC:94467]
TRPM2	ENSSSCG00000004636	TRPM7	transient receptor potential cation channel subfamily M member 7 [Source:VGNC Symbol;Acc:VGNC:94470]
TRPM2	ENSSSCG00000018032	TRPV2	transient receptor potential cation channel subfamily V member 2 [Source:VGNC Symbol;Acc:VGNC:94474]
TRPM2	ENSSSCG00000006862	VCAM1	vascular cell adhesion molecule 1 [Source:VGNC Symbol;Acc:VGNC:94811]
