# Supplementary material for: Altered hair root gene expression profiles highlight calcium signaling and lipid metabolism pathways to be associated with curly hair initiation and maintenance in Mangalitza pigs
Source: Front Genet. 2023 Jun 7;14:1184015. doi: 10.3389/fgene.2023.1184015 (PMC10282778; doi:10.3389/fgene.2023.1184015)
Supplement: Supplementary file 10 [file Table1.XLSX]

## Sheet: Sheet1
Table S1 Summary of samples used in this study. The sampled pigs including breed, hair phenotype, sex, date of birth, and the obtained samples at different time points are given. In addition, sequencer, read length, number of the sequenced reads, percentage of the mapped reads, accession numbers, differential gene expression analysis approach as well as their genotypes for CYP4F3 and TRPM2 (curly…
Animal	Breed/ population	Phenotype	Sex	Date of birth	Sample date	Sampling temp.	Sequencer	Read length	Single/paired end	Number of sequenced reads	Mapped reads (%)	Bioproject	Biosample	Run accession	Analysis	Hair measurements (March 2020)	Genotype SSC2:g.61866070T>C (CYP4F3)	Genotype SSC13:g.207222334G>C (TRPM2)
Pig 1	Angeln Saddleback x Mangalitza	Curly	female	16.11.2018	March 2019	5°C	NextSeq 500	75bp	paired	83561526	0.8599	PRJNA862648	SAMN29989865	SRR20706677	CvsSt + SHvsP	yes	T/C	G/G
Pig 2	Angeln Saddleback x Mangalitza	Curly	male	16.11.2018	March 2019	5°C	NextSeq 500	75bp	paired	66873564	0.841	PRJNA862648	SAMN29989866	SRR20706676	CvsSt + SHvsP	yes	T/C	G/G
Pig 3	Angeln Saddleback x Mangalitza	Curly	male	16.11.2018	March 2019	5°C	NextSeq 500	75bp	paired	75248446	0.8526	PRJNA862648	SAMN29989867	SRR20706665	CvsSt + SHvsP	yes	T/C	G/C
Pig 4	Angeln Saddleback x Mangalitza	Curly	male	16.11.2018	March 2019	5°C	NextSeq 500	75bp	paired	72363954	0.8398	PRJNA862648	SAMN29989868	SRR20706654	CvsSt + SHvsP	yes	T/C	G/G
Pig 5	Angeln Saddleback x Mangalitza	Curly	male	16.11.2018	March 2019	5°C	NextSeq 500	75bp	paired	67542258	0.8782	PRJNA862648	SAMN29989869	SRR20706643	CvsSt + SHvsP	yes	T/C	G/G
Pig 6	Angeln Saddleback x Mangalitza	Curly	female	16.11.2018	March 2019	5°C	NextSeq 500	75bp	paired	67859238	0.8672	PRJNA862648	SAMN29989870	SRR20706635	CvsSt + SHvsP	yes	T/C	G/C
Pig 7	Angeln Saddleback x Mangalitza	Curly	female	16.11.2018	March 2019	5°C	NextSeq 500	75bp	paired	67253850	0.8382	PRJNA862648	SAMN29989871	SRR20706634	CvsSt + SHvsP	yes	T/C	G/C
Pig 8	Angeln Saddleback	Straight	female	19.11.2017	March 2019	5°C	NextSeq 500	75bp	paired	54564672	0.8523	PRJNA862648	SAMN29989872	SRR20706633	CvsSt + TCA	yes	T/T	G/G
Pig 9	Miniature Pig	Straight	male	01.01.2016	March 2019	5°C	NextSeq 500	75bp	paired	54919028	0.852	PRJNA862648	SAMN29989873	SRR20706632	CvsSt + TCA	yes	T/T	G/G
Pig 10	Mangalitza	Curly	female	15.05.2017	March 2019	5°C	NextSeq 500	75bp	paired	70415440	0.8884	PRJNA862648	SAMN29989874	SRR20706631	CvsSt + TCA	yes	C/C	G/C
Pig 11	Mangalitza	Curly	female	15.05.2017	March 2019	5°C	NextSeq 500	75bp	paired	56999930	0.8946	PRJNA862648	SAMN29989875	SRR20706675	CvsSt + TCA	yes	C/C	G/C
Pig 12	Mangalitza	Curly	male (casterated)	15.05.2017	March 2019	5°C	NextSeq 500	75bp	paired	60636300	0.8887	PRJNA862648	SAMN29989876	SRR20706674	CvsSt + TCA	yes	C/C	G/G
Pig 13	Mangalitza	Curly	male (casterated)	15.05.2017	March 2019	5°C	NextSeq 500	75bp	paired	57946114	0.8861	PRJNA862648	SAMN29989877	SRR20706673	CvsSt + TCA	yes	C/C	G/C
Pig 14	Mangalitza	Curly	male (casterated)	15.05.2017	March 2019	5°C	NextSeq 500	75bp	paired	60043236	0.8887	PRJNA862648	SAMN29989878	SRR20706672	CvsSt + TCA	yes	C/C	G/C
Pig 15	Red Pied Husum x Angeln Saddleback	Straight	female	01.09.2016	March 2019	6°C	NovaSeq 6000	100bp	paired	60738088	0.9104	PRJNA862648	SAMN29989879	SRR20706671	CvsSt	no	T/T	G/G
Pig 16	Red Pied Husum	Straight	male	01.06.2018	March 2019	6°C	NovaSeq 6000	100bp	paired	66187342	0.8738	PRJNA862648	SAMN29989880	SRR20706670	CvsSt	no	T/T	G/G
Pig 17	Angeln Saddleback	Straight	female	01.01.2012	March 2019	6°C	NovaSeq 6000	100bp	paired	68596762	0.8942	PRJNA862648	SAMN29989881	SRR20706669	CvsSt	no	T/T	G/G
Pig 18	Red Pied Husum	Straight	female	01.01.2012	March 2019	6°C	NovaSeq 6000	100bp	paired	71617204	0.9053	PRJNA862648	SAMN29989882	SRR20706668	CvsSt	no	T/T	G/G
Pig 19	Red Pied Husum	Straight	female	01.01.2016	March 2019	6°C	NovaSeq 6000	100bp	paired	73349160	0.8938	PRJNA862648	SAMN29989883	SRR20706667	CvsSt	no	T/T	G/G
Pig 10	Mangalitza	Curly	female	15.05.2017	June 2018	21°C	NovaSeq 6000	100bp	paired	72385456	0.9031	PRJNA862648	SAMN29989884	SRR20706666	TCA	no	C/C	G/C
Pig 11	Mangalitza	Curly	female	15.05.2017	June 2018	21°C	NovaSeq 6000	100bp	paired	88165788	0.8906	PRJNA862648	SAMN29989885	SRR20706664	TCA	no	C/C	G/C
Pig 12	Mangalitza	Curly	male (casterated)	15.05.2017	June 2018	21°C	NovaSeq 6000	100bp	paired	73266686	0.8738	PRJNA862648	SAMN29989886	SRR20706663	TCA	no	C/C	G/G
Pig 14	Mangalitza	Curly	male (casterated)	15.05.2017	June 2018	21°C	NovaSeq 6000	100bp	paired	58137566	0.8846	PRJNA862648	SAMN29989887	SRR20706662	TCA	no	C/C	G/C
Pig 8	Angeln Saddleback	Straight	female	19.11.2017	June 2018	21°C	NovaSeq 6000	100bp	paired	67420558	0.8675	PRJNA862648	SAMN29989888	SRR20706661	TCA	no	T/T	G/G
Pig 10	Mangalitza	Curly	female	15.05.2017	August 2018	20°C	NextSeq 500	75bp	paired	52247710	0.8892	PRJNA862648	SAMN29989889	SRR20706660	TCA	no	C/C	G/C
Pig 11	Mangalitza	Curly	female	15.05.2017	August 2018	20°C	NextSeq 500	75bp	paired	72259676	0.8788	PRJNA862648	SAMN29989890	SRR20706659	TCA	no	C/C	G/C
Pig 12	Mangalitza	Curly	male (casterated)	15.05.2017	August 2018	20°C	NextSeq 500	75bp	paired	63749732	0.8857	PRJNA862648	SAMN29989891	SRR20706658	TCA	no	C/C	G/G
Pig 13	Mangalitza	Curly	male (casterated)	15.05.2017	August 2018	20°C	NextSeq 500	75bp	paired	48251806	0.8927	PRJNA862648	SAMN29989892	SRR20706657	TCA	no	C/C	G/C
Pig 14	Mangalitza	Curly	male (casterated)	15.05.2017	August 2018	20°C	NextSeq 500	75bp	paired	55691948	0.9038	PRJNA862648	SAMN29989893	SRR20706656	TCA	no	C/C	G/C
Pig 8	Angeln Saddleback	Straight	female	19.11.2017	August 2018	20°C	NextSeq 500	75bp	paired	60302514	0.8687	PRJNA862648	SAMN29989894	SRR20706655	TCA	no	T/T	G/G
Pig 10	Mangalitza	Curly	female	15.05.2017	September 2018	17°C	NovaSeq 6000	100bp	paired	77019906	0.8114	PRJNA862648	SAMN29989895	SRR20706653	TCA	no	C/C	G/C
Pig 11	Mangalitza	Curly	female	15.05.2017	September 2018	17°C	NovaSeq 6000	100bp	paired	104408362	0.8731	PRJNA862648	SAMN29989896	SRR20706652	TCA	no	C/C	G/C
Pig 12	Mangalitza	Curly	male (casterated)	15.05.2017	September 2018	17°C	NovaSeq 6000	100bp	paired	71462370	0.8684	PRJNA862648	SAMN29989897	SRR20706651	TCA	no	C/C	G/G
Pig 14	Mangalitza	Curly	male (casterated)	15.05.2017	September 2018	17°C	NovaSeq 6000	100bp	paired	88116154	0.8666	PRJNA862648	SAMN29989898	SRR20706650	TCA	no	C/C	G/C
Pig 8	Angeln Saddleback	Straight	female	19.11.2017	September 2018	17°C	NovaSeq 6000	100bp	paired	48698036	0.8444	PRJNA862648	SAMN29989899	SRR20706649	TCA	no	T/T	G/G
Pig 1	Angeln Saddleback x Mangalitza	Straight	female	16.11.2018	December 2018	6°C	NextSeq 500	75bp	paired	73544740	0.8442	PRJNA862648	SAMN29989900	SRR20706648	SHvsP	no	T/C	G/G
Pig 2	Angeln Saddleback x Mangalitza	Straight	male	16.11.2018	December 2018	6°C	NextSeq 500	75bp	paired	58130062	0.8477	PRJNA862648	SAMN29989901	SRR20706647	SHvsP	no	T/C	G/G
Pig 3	Angeln Saddleback x Mangalitza	Straight	male	16.11.2018	December 2018	6°C	NextSeq 500	75bp	paired	51192458	0.817	PRJNA862648	SAMN29989902	SRR20706646	SHvsP	no	T/C	G/C
Pig 4	Angeln Saddleback x Mangalitza	Straight	male	16.11.2018	December 2018	6°C	NextSeq 500	75bp	paired	57942700	0.8178	PRJNA862648	SAMN29989903	SRR20706645	SHvsP	no	T/C	G/G
Pig 5	Angeln Saddleback x Mangalitza	Straight	male	16.11.2018	December 2018	6°C	NextSeq 500	75bp	paired	109997026	0.8282	PRJNA862648	SAMN29989904	SRR20706644	SHvsP	no	T/C	G/G
Pig 6	Angeln Saddleback x Mangalitza	Straight	female	16.11.2018	December 2018	6°C	NextSeq 500	75bp	paired	71134638	0.8559	PRJNA862648	SAMN29989905	SRR20706642	SHvsP	no	T/C	G/C
Pig 7	Angeln Saddleback x Mangalitza	Straight	female	16.11.2018	December 2018	6°C	NextSeq 500	75bp	paired	64734770	0.8345	PRJNA862648	SAMN29989906	SRR20706641	SHvsP	no	T/C	G/C
Pig 10	Mangalitza	Curly	female	15.05.2017	December 2018	4°C	NextSeq 500	75bp	paired	53685104	0.8758	PRJNA862648	SAMN29989907	SRR20706640	TCA	no	C/C	G/C
Pig 11	Mangalitza	Curly	female	15.05.2017	December 2018	4°C	NextSeq 500	75bp	paired	66955604	0.8743	PRJNA862648	SAMN29989908	SRR20706639	TCA	no	C/C	G/C
Pig 12	Mangalitza	Curly	male (casterated)	15.05.2017	December 2018	4°C	NextSeq 500	75bp	paired	64680590	0.8759	PRJNA862648	SAMN29989909	SRR20706638	TCA	no	C/C	G/G
Pig 14	Mangalitza	Curly	male (casterated)	15.05.2017	December 2018	4°C	NextSeq 500	75bp	paired	55308104	0.8746	PRJNA862648	SAMN29989910	SRR20706637	TCA	no	C/C	G/C
Pig 8	Angeln Saddleback	Straight	female	19.11.2017	December 2018	4°C	NextSeq 500	75bp	paired	59914104	0.8204	PRJNA862648	SAMN29989911	SRR20706636	TCA	no	T/T	G/G
Pig 20	Mangalitza	Curly	male	15.05.2017	March 2020	5°C	NA	NA	NA	NA	NA	NA	NA	NA	NA	yes	C/C	G/C
Pig 21	Angeln Saddleback x Mangalitza	Curly	female	16.11.2018	March 2020	5°C	NA	NA	NA	NA	NA	NA	NA	NA	NA	yes	T/C	G/G
Pig 22	Angeln Saddleback x Mangalitza	Curly	male	16.11.2018	March 2020	5°C	NA	NA	NA	NA	NA	NA	NA	NA	NA	yes	T/C	G/G
Pig 23	Angeln Saddleback x Mangalitza	Curly	male	16.11.2018	March 2020	5°C	NA	NA	NA	NA	NA	NA	NA	NA	NA	yes	T/C	G/C
Pig 24	Angeln Saddleback x Mangalitza	Curly	male	16.11.2018	March 2020	5°C	NA	NA	NA	NA	NA	NA	NA	NA	NA	yes	T/C	G/G
