# Supplementary material for: Altered hair root gene expression profiles highlight calcium signaling and lipid metabolism pathways to be associated with curly hair initiation and maintenance in Mangalitza pigs
Source: Front Genet. 2023 Jun 7;14:1184015. doi: 10.3389/fgene.2023.1184015 (PMC10282778; doi:10.3389/fgene.2023.1184015)
Supplement: Supplementary file 11 [file Table12.XLSX]

## Sheet: Module Magenta
Table S12 List of genes in modules magenta, turquoise and blue. Module magenta has the strongest correlation with curly phenotype in SHvsP analysis. Modules turquoise and blue harbor CYP4F3 and TRPM2, respectively. Genes are presented with their association to the trait (gene significance; GS) and their correlation with module eigengene (module membership; MM). The genes with absolute GS >0.2 and…
Ensemble ID	Gene name	Module color	GS	GS p-value	MM	MM p-value
ENSSSCG00000000079	FAM83F	magenta	-0.134936	0.645571	-0.904983	8.63e-06
ENSSSCG00000000095	GTPBP1	magenta	0.096093	0.743833	0.76121	0.00156443
ENSSSCG00000000362	RDH5	magenta	-0.515375	0.0592755	-0.352429	0.216511
ENSSSCG00000000464	C12orf56	magenta	0.182652	0.531973	0.921836	2.78e-06
ENSSSCG00000000499	BEST3	magenta	0.422977	0.131844	0.706247	0.00475475
ENSSSCG00000000602	RERG	magenta	0.0144156	0.96099	-0.326077	0.255219
ENSSSCG00000000737	TULP3	magenta	-0.179128	0.54005	-0.957647	7.6e-08
ENSSSCG00000000795	ADAMTS20	magenta	0.155494	0.595551	0.750146	0.00199988
ENSSSCG00000001578	CMTR1	magenta	0.223807	0.441793	-0.767419	0.00135537
ENSSSCG00000001621	TFEB	magenta	-0.0220501	0.940358	-0.499522	0.0689626
ENSSSCG00000001724		magenta	0.430731	0.124166	0.502752	0.0669034
ENSSSCG00000002016	THTPA	magenta	0.0994236	0.735239	0.624692	0.0169223
ENSSSCG00000002516	WARS1	magenta	0.110462	0.706968	0.841756	0.000159751
ENSSSCG00000002627	GSTA4	magenta	0.372732	0.189346	0.755669	0.00177189
ENSSSCG00000002875		magenta	0.14557	0.619506	0.411345	0.143951
ENSSSCG00000002916	APLP1	magenta	0.193214	0.508088	0.908633	6.88e-06
ENSSSCG00000003022	TMEM145	magenta	-0.00921061	0.97507	-0.39295	0.164565
ENSSSCG00000003201	ATF5	magenta	0.127573	0.663842	0.919964	3.19e-06
ENSSSCG00000003339	INTS11	magenta	0.161845	0.580416	0.90511	8.57e-06
ENSSSCG00000003402	PGD	magenta	0.065305	0.824468	0.766705	0.00137821
ENSSSCG00000003459	CELA2A	magenta	-0.553321	0.0401163	-0.708642	0.00455315
ENSSSCG00000003484	PADI6	magenta	0.401116	0.15519	0.356496	0.210884
ENSSSCG00000003520	CDC42	magenta	-0.164536	0.574052	-0.784389	0.000895233
ENSSSCG00000003640	GRIK3	magenta	-0.0342746	0.907399	-0.879965	3.32e-05
ENSSSCG00000003662	NT5C1A	magenta	-0.184757	0.527173	-0.709347	0.00449504
ENSSSCG00000003733	KLHL14	magenta	0.255707	0.377578	0.619515	0.0181353
ENSSSCG00000003744	MOCOS	magenta	0.543525	0.0445492	0.676376	0.00790552
ENSSSCG00000003748	CELF4	magenta	0.139632	0.634012	-0.897048	1.37e-05
ENSSSCG00000003780	CRYZ	magenta	0.368998	0.194169	0.417568	0.137386
ENSSSCG00000003812	PGM1	magenta	-0.162483	0.578905	0.667388	0.00911474
ENSSSCG00000003851	CPT2	magenta	-0.0233149	0.936943	0.907697	7.3e-06
ENSSSCG00000003852	SLC1A7	magenta	0.4168	0.138185	0.65609	0.0108317
ENSSSCG00000003870	NRDC	magenta	0.198109	0.497186	0.962064	3.97e-08
ENSSSCG00000003922	UROD	magenta	-0.166434	0.56958	0.787174	0.000833458
ENSSSCG00000003975	KCNQ4	magenta	0.32153	0.262294	0.592906	0.02544
ENSSSCG00000003976	NFYC	magenta	0.306368	0.286723	0.579872	0.0297326
ENSSSCG00000003981	ZFP69B	magenta	-0.112821	0.700972	-0.910783	5.99e-06
ENSSSCG00000004004	ZNF584	magenta	-0.154431	0.598099	0.835728	0.000197184
ENSSSCG00000004022	RPS6KA2	magenta	0.229644	0.429656	0.574789	0.0315449
ENSSSCG00000004040	SLC22A2	magenta	0.403153	0.152907	0.284575	0.324084
ENSSSCG00000004052	FNDC1	magenta	0.0131902	0.964304	-0.889613	2.05e-05
ENSSSCG00000004164	MTFR2	magenta	0.189754	0.515857	0.897778	1.32e-05
ENSSSCG00000004244	MAN1A1	magenta	-0.149982	0.608811	-0.403663	0.152339
ENSSSCG00000004254	DCBLD1	magenta	0.0622693	0.832519	0.503276	0.0665733
ENSSSCG00000004399	SLC22A16	magenta	-0.0281144	0.923994	-0.844485	0.000144817
ENSSSCG00000004456	PGM3	magenta	0.310785	0.279473	0.773792	0.0011646
ENSSSCG00000004473	PHIP	magenta	-0.00787281	0.97869	-0.887238	2.32e-05
ENSSSCG00000004508	DYM	magenta	0.317587	0.268522	0.684916	0.00687549
ENSSSCG00000004534	CCDC68	magenta	0.0443028	0.880462	0.938734	6.69e-07
ENSSSCG00000004698	SERINC4	magenta	-0.0985929	0.73738	-0.871919	4.81e-05
ENSSSCG00000004718	TTBK2	magenta	-0.129306	0.659526	-0.489446	0.0756759
ENSSSCG00000004813	TTC23	magenta	-0.361982	0.203442	-0.457871	0.09969
ENSSSCG00000004822	ALDH1A3	magenta	-0.031638	0.914498	0.614635	0.0193382
ENSSSCG00000004917	MALT1	magenta	-0.198029	0.497362	-0.885486	2.53e-05
ENSSSCG00000005045	BMP4	magenta	-0.243654	0.401227	0.811641	0.000423978
ENSSSCG00000005089	SIX4	magenta	0.256051	0.376914	0.703943	0.00495533
ENSSSCG00000005252	PTAR1	magenta	-0.151521	0.605099	-0.903705	9.33e-06
ENSSSCG00000005307		magenta	-0.45677	0.100612	-0.423339	0.131479
ENSSSCG00000005465	SUSD1	magenta	0.293411	0.308618	0.356568	0.210786
ENSSSCG00000005494	TNC	magenta	-0.0917591	0.755056	-0.912905	5.21e-06
ENSSSCG00000005512	C5	magenta	0.000905477	0.997549	-0.867911	5.73e-05
ENSSSCG00000005597	GOLGA1	magenta	-0.156454	0.593255	-0.831983	0.000223816
ENSSSCG00000005767	SKOR2	magenta	0.38794	0.170497	0.755129	0.00179322
ENSSSCG00000005946	CCN4	magenta	0.381098	0.178819	0.530669	0.0508973
ENSSSCG00000006078	POP1	magenta	-0.00166782	0.995485	0.828107	0.000254361
ENSSSCG00000006316	MAEL	magenta	0.150618	0.607276	0.684426	0.00693169
ENSSSCG00000006571	INTS3	magenta	0.00961657	0.973972	0.82685	0.000264966
ENSSSCG00000006777		magenta	0.363375	0.20158	0.536502	0.0479407
ENSSSCG00000006904	GLMN	magenta	-0.146999	0.616036	-0.846426	0.000134899
ENSSSCG00000006914	BARHL2	magenta	-0.261211	0.367034	-0.592957	0.025424
ENSSSCG00000006955	GSDMD	magenta	0.539452	0.0464942	0.663244	0.00971807
ENSSSCG00000006981	MICU3	magenta	0.0118048	0.968051	-0.838543	0.000178909
ENSSSCG00000007212	C20orf96	magenta	0.20553	0.480867	0.617636	0.0185916
ENSSSCG00000007278	AHCY	magenta	-0.0557763	0.849792	0.910445	6.13e-06
ENSSSCG00000007453	EYA2	magenta	0.0220888	0.940254	-0.925312	2.13e-06
ENSSSCG00000007492	FAM210B	magenta	-0.0861622	0.769617	-0.932362	1.19e-06
ENSSSCG00000007648	GAL3ST4	magenta	-0.113657	0.698849	-0.828353	0.000252329
ENSSSCG00000007717	METTL27	magenta	-0.156848	0.592312	0.650019	0.0118516
ENSSSCG00000007789		magenta	-0.327582	0.252903	-0.620703	0.0178513
ENSSSCG00000007842	SDR42E2	magenta	0.0850778	0.772446	-0.892311	1.78e-05
ENSSSCG00000007859	UMOD	magenta	0.38794	0.170497	0.755129	0.00179322
ENSSSCG00000007965	ZNF200	magenta	-0.257802	0.373545	-0.535656	0.0483617
ENSSSCG00000008090	IL1A	magenta	-0.358251	0.208486	-0.57601	0.0311024
ENSSSCG00000008096	ZC3H6	magenta	0.187394	0.521189	-0.8834	2.81e-05
ENSSSCG00000008169	TBC1D8	magenta	-0.0924018	0.753389	-0.810875	0.00043366
ENSSSCG00000008230	ATOH8	magenta	0.390261	0.167732	0.762838	0.00150729
ENSSSCG00000008415	ASB3	magenta	0.215135	0.460132	0.532799	0.0498028
ENSSSCG00000008499	STRN	magenta	-0.320257	0.264295	-0.450391	0.106071
ENSSSCG00000008799	LIMCH1	magenta	0.0339007	0.908405	-0.87594	4.01e-05
ENSSSCG00000009069	C4orf33	magenta	0.328501	0.251496	0.777772	0.00105674
ENSSSCG00000009194	HPGDS	magenta	-0.383631	0.175708	-0.407119	0.148526
ENSSSCG00000009401	RB1	magenta	0.039635	0.892987	0.902218	1.02e-05
ENSSSCG00000009536	ARGLU1	magenta	-0.537794	0.047303	-0.865805	6.28e-05
ENSSSCG00000009679	FZD3	magenta	-0.107554	0.714383	-0.823928	0.000290991
ENSSSCG00000009747	STX2	magenta	-0.00432547	0.988291	-0.841282	0.000162466
ENSSSCG00000009848		magenta	-0.238979	0.410601	-0.527146	0.0527462
ENSSSCG00000009975	EMID1	magenta	0.51184	0.0613453	0.689837	0.00633137
ENSSSCG00000010007	MTFP1	magenta	-0.0684997	0.816011	0.8947	1.56e-05
ENSSSCG00000010076	ZNF70	magenta	-0.160502	0.583604	-0.412721	0.142481
ENSSSCG00000010138	ZDHHC8	magenta	0.345692	0.226035	0.607633	0.0211681
ENSSSCG00000010234		magenta	0.428277	0.126563	0.373686	0.188126
ENSSSCG00000010392	CHAT	magenta	0.38794	0.170497	0.755129	0.00179322
ENSSSCG00000010514	RRP12	magenta	0.206352	0.479076	0.888338	2.19e-05
ENSSSCG00000010532	LOXL4	magenta	0.199675	0.493721	0.642985	0.0131237
ENSSSCG00000010607	COL17A1	magenta	-0.165773	0.571136	-0.895301	1.51e-05
ENSSSCG00000010645	NHLRC2	magenta	-0.287117	0.319591	-0.645512	0.0126553
ENSSSCG00000010744	DHX32	magenta	0.0228113	0.938303	0.555222	0.0392948
ENSSSCG00000010761	STK32C	magenta	0.0653962	0.824226	0.696195	0.00567851
ENSSSCG00000010765	INPP5A	magenta	0.127064	0.665111	0.920917	2.97e-06
ENSSSCG00000010892	KCNT2	magenta	0.340293	0.233852	0.725173	0.00333719
ENSSSCG00000010959	NTRK2	magenta	-0.0979149	0.739128	-0.86278	7.12e-05
ENSSSCG00000011360	CELSR3	magenta	0.581807	0.0290634	0.407223	0.148413
ENSSSCG00000011402	IFRD2	magenta	0.0884685	0.763608	0.903604	9.38e-06
ENSSSCG00000011441	TNNC1	magenta	0.353014	0.215696	0.706621	0.00472286
ENSSSCG00000011540	SETD5	magenta	-0.0291439	0.921218	-0.85942	8.17e-05
ENSSSCG00000011570	IRAK2	magenta	-0.605262	0.0218161	-0.609119	0.0207691
ENSSSCG00000011616	COPG1	magenta	-0.0614212	0.834772	0.830852	0.000232401
ENSSSCG00000011625	CHST13	magenta	-0.6072	0.0212854	-0.387254	0.17132
ENSSSCG00000011636	BFSP2	magenta	0.222058	0.445461	0.544796	0.0439546
ENSSSCG00000011721	P2RY1	magenta	0.0226855	0.938642	-0.898877	1.24e-05
ENSSSCG00000011768	CCDC39	magenta	-0.444563	0.111233	-0.646011	0.0125644
ENSSSCG00000011889	GSK3B	magenta	-0.00264304	0.992845	-0.882273	2.97e-05
ENSSSCG00000011918	USF3	magenta	-0.106547	0.716957	-0.888994	2.12e-05
ENSSSCG00000012141	CA5B	magenta	-0.144116	0.623046	0.346622	0.224705
ENSSSCG00000012172	ACOT9	magenta	0.115528	0.694109	0.848982	0.000122689
ENSSSCG00000012254	GPR82	magenta	0.299501	0.298212	0.521438	0.0558438
ENSSSCG00000012257		magenta	0.417925	0.137015	0.643388	0.0130481
ENSSSCG00000012275	ARAF	magenta	0.588724	0.026763	0.620992	0.0177827
ENSSSCG00000012286	ZNF630	magenta	-0.161921	0.580238	-0.367187	0.196537
ENSSSCG00000012326	RIBC1	magenta	0.204061	0.484077	0.937605	7.44e-07
ENSSSCG00000012571	COL4A6	magenta	0.0141304	0.961761	-0.835378	0.000199558
ENSSSCG00000012607	TMEM255A	magenta	-0.179798	0.538511	-0.496122	0.0711787
ENSSSCG00000012770	CCNQ	magenta	-0.0901153	0.759325	-0.595796	0.0245546
ENSSSCG00000012895		magenta	0.0461952	0.875392	0.812066	0.000418683
ENSSSCG00000012896	NDUFV1	magenta	0.0807527	0.783757	0.83656	0.00019163
ENSSSCG00000012915		magenta	-0.0582284	0.843261	-0.910311	6.18e-06
ENSSSCG00000012957	SF3B2	magenta	0.488125	0.0765891	0.559419	0.0375256
ENSSSCG00000013023	RASGRP2	magenta	0.42962	0.125248	0.354172	0.214088
ENSSSCG00000013118	MRPL16	magenta	0.0619	0.8335	0.909009	6.72e-06
ENSSSCG00000013237	SPI1	magenta	-0.134019	0.647835	-0.388155	0.170239
ENSSSCG00000013551	C3	magenta	0.336465	0.239493	0.576269	0.0310089
ENSSSCG00000013627	PRKCSH	magenta	0.257682	0.373777	0.917338	3.85e-06
ENSSSCG00000013744	TRMT1	magenta	0.0798677	0.786077	0.835521	0.000198584
ENSSSCG00000013874	OCEL1	magenta	0.254385	0.380135	0.461685	0.0965411
ENSSSCG00000013978	ZNF672	magenta	0.0113908	0.969171	-0.930002	1.46e-06
ENSSSCG00000014259	ADAMTS19	magenta	0.0657168	0.823376	-0.796021	0.000659478
ENSSSCG00000014288	GDF9	magenta	0.133886	0.648163	-0.509161	0.0629481
ENSSSCG00000014296	VDAC1	magenta	0.103326	0.725207	0.734556	0.0027708
ENSSSCG00000014884		magenta	-0.0294146	0.920489	0.887051	2.34e-05
ENSSSCG00000014994	PDGFD	magenta	0.316616	0.27007	0.502858	0.0668365
ENSSSCG00000015234	KIRREL3	magenta	0.0699828	0.812092	0.875822	4.03e-05
ENSSSCG00000015334	PDK4	magenta	0.346232	0.225262	0.702939	0.00504474
ENSSSCG00000015368	HDAC9	magenta	0.540401	0.0460354	0.499498	0.0689783
ENSSSCG00000015430	RINT1	magenta	0.107191	0.715311	0.883682	2.77e-05
ENSSSCG00000015556	LAMC2	magenta	0.010033	0.972845	-0.824091	0.000289484
ENSSSCG00000015662	C4BPA	magenta	-0.762392	0.00152276	-0.486879	0.077458
ENSSSCG00000015691		magenta	-0.213439	0.463762	-0.637542	0.0141778
ENSSSCG00000015720	BIN1	magenta	0.0669703	0.820057	0.546604	0.0431191
ENSSSCG00000015734	IMP4	magenta	-0.0744657	0.80027	0.810173	0.00044269
ENSSSCG00000015755	AGPAT5	magenta	0.0627242	0.831312	0.92454	2.26e-06
ENSSSCG00000015894	DPP4	magenta	0.0718151	0.807255	0.9079	7.21e-06
ENSSSCG00000015895	GCG	magenta	0.380633	0.179395	0.66202	0.00990201
ENSSSCG00000016047	MSTN	magenta	-0.115166	0.695024	-0.830823	0.000232626
ENSSSCG00000016135	CPO	magenta	-0.0617684	0.833849	-0.572993	0.0322044
ENSSSCG00000016378	PASK	magenta	0.386423	0.17232	0.443854	0.111873
ENSSSCG00000016441		magenta	0.0120281	0.967447	0.915046	4.51e-06
ENSSSCG00000016567	STRIP2	magenta	-0.177459	0.543895	-0.846976	0.000132193
ENSSSCG00000016639	FOXP2	magenta	0.0120463	0.967398	-0.869451	5.36e-05
ENSSSCG00000016851	OSMR	magenta	0.00143965	0.996103	-0.845275	0.000140713
ENSSSCG00000017186	RNF157	magenta	0.105224	0.720341	0.876884	3.84e-05
ENSSSCG00000017190	EXOC7	magenta	0.511098	0.0617863	0.308961	0.282454
ENSSSCG00000017254	MAP2K6	magenta	-0.339244	0.23539	-0.538311	0.0470498
ENSSSCG00000017277	PECAM1	magenta	-0.00215105	0.994177	-0.89047	1.96e-05
ENSSSCG00000017331		magenta	-0.065111	0.824981	-0.424327	0.130485
ENSSSCG00000017415	ODAD4	magenta	0.0823612	0.779546	-0.884298	2.69e-05
ENSSSCG00000017439	KRT32	magenta	0.148742	0.611811	0.90613	8.05e-06
ENSSSCG00000017500	TCAP	magenta	-0.336788	0.239014	-0.516266	0.0587618
ENSSSCG00000017544	ATP5MC1	magenta	0.0051861	0.985962	0.915243	4.45e-06
ENSSSCG00000017747	RAB11FIP4	magenta	0.0491833	0.867394	0.918975	3.42e-06
ENSSSCG00000017779	PHF12	magenta	-0.0672912	0.819208	-0.928312	1.68e-06
ENSSSCG00000017829	SGSM2	magenta	-0.397302	0.159524	-0.583361	0.0285341
ENSSSCG00000017936		magenta	0.438737	0.116563	0.696911	0.00560841
ENSSSCG00000017938	YBX2	magenta	0.070538	0.810625	0.521087	0.0560383
ENSSSCG00000018412		magenta	-0.205754	0.48038	0.354487	0.213652
ENSSSCG00000018591	SNORD105	magenta	-0.0874561	0.766244	-0.406011	0.149741
ENSSSCG00000019512	U6	magenta	0.248926	0.390789	0.399365	0.157169
ENSSSCG00000021540	C2CD4D	magenta	-0.0743693	0.800524	-0.894453	1.58e-05
ENSSSCG00000021654	ZNF641	magenta	0.0403983	0.890937	-0.79047	0.000764809
ENSSSCG00000021656		magenta	0.151839	0.604331	-0.872011	4.79e-05
ENSSSCG00000021746	MRPL35	magenta	-0.123515	0.67399	0.896656	1.4e-05
ENSSSCG00000022256	DEPP1	magenta	0.332364	0.245628	0.602235	0.0226655
ENSSSCG00000022322		magenta	-0.105309	0.720124	-0.843916	0.00014783
ENSSSCG00000022413	TIRAP	magenta	-0.0340333	0.908049	-0.844468	0.000144905
ENSSSCG00000022423		magenta	0.22308	0.443316	0.677023	0.00782357
ENSSSCG00000022926	SNORA63	magenta	-0.238599	0.411369	-0.390025	0.168012
ENSSSCG00000022988	TSPEAR	magenta	0.589066	0.0266528	0.788079	0.000814129
ENSSSCG00000023556	SUPT5H	magenta	-0.41428	0.14083	-0.386367	0.172388
ENSSSCG00000023665	FBXO25	magenta	0.098252	0.738259	0.878947	3.48e-05
ENSSSCG00000023818	MRPS27	magenta	0.216297	0.457655	0.676427	0.00789904
ENSSSCG00000024268		magenta	-0.163169	0.577281	-0.894021	1.62e-05
ENSSSCG00000024549	LYL1	magenta	-0.0177803	0.951894	-0.634224	0.0148514
ENSSSCG00000024761	SNX13	magenta	-0.00476339	0.987106	0.879973	3.32e-05
ENSSSCG00000024793	PORCN	magenta	0.0630667	0.830403	0.423547	0.13127
ENSSSCG00000024950		magenta	-0.16648	0.569473	-0.582025	0.0289889
ENSSSCG00000025013	RTN1	magenta	-0.0593449	0.840291	-0.850749	0.000114787
ENSSSCG00000025114	FMNL3	magenta	-0.152799	0.602019	0.794314	0.000690543
ENSSSCG00000025182	ELK4	magenta	-0.0723291	0.805899	-0.886683	2.38e-05
ENSSSCG00000025448	SERTAD3	magenta	-0.403658	0.152344	-0.422921	0.131902
ENSSSCG00000025545	HDAC6	magenta	-0.158613	0.588098	-0.515554	0.0591721
ENSSSCG00000025796	NLE1	magenta	-0.0145257	0.960692	0.809694	0.000448934
ENSSSCG00000025838	AP1M2	magenta	-0.19472	0.504722	0.892495	1.76e-05
ENSSSCG00000025943	C6orf136	magenta	-0.0984791	0.737673	-0.971636	7.07e-09
ENSSSCG00000026488		magenta	-0.17396	0.551992	-0.636756	0.0143352
ENSSSCG00000026594		magenta	0.338319	0.236751	0.506835	0.0643633
ENSSSCG00000026752	BYSL	magenta	-0.0944178	0.748165	0.769437	0.00129246
ENSSSCG00000027017		magenta	-0.0189215	0.948809	-0.842735	0.000154253
ENSSSCG00000027063	DPY19L1	magenta	-0.140514	0.631849	-0.908029	7.15e-06
ENSSSCG00000027503	OSBPL8	magenta	0.0717716	0.80737	-0.787846	0.000819083
ENSSSCG00000027722	BMP2K	magenta	-0.0691225	0.814365	-0.908367	7e-06
ENSSSCG00000027774	ZFP28	magenta	-0.038137	0.897012	-0.892364	1.77e-05
ENSSSCG00000027854	HSD17B6	magenta	0.362361	0.202935	0.709687	0.00446727
ENSSSCG00000027860	ERAP2	magenta	-0.180276	0.537413	-0.938582	6.78e-07
ENSSSCG00000028005		magenta	0.374312	0.187328	0.703909	0.00495831
ENSSSCG00000028159		magenta	-0.115715	0.693635	0.859282	8.22e-05
ENSSSCG00000028239	FBXL7	magenta	0.544622	0.0440357	0.654062	0.0111645
ENSSSCG00000028290	SNORD27	magenta	-0.25982	0.369683	-0.46424	0.0944703
ENSSSCG00000028338	PAMR1	magenta	-0.499164	0.0691938	-0.710255	0.00442114
ENSSSCG00000028460	S1PR5	magenta	-0.0322301	0.912903	-0.860204	7.92e-05
ENSSSCG00000028504	RFC2	magenta	0.22251	0.444511	0.740236	0.00246675
ENSSSCG00000028693		magenta	-0.201228	0.490297	-0.479923	0.0824345
ENSSSCG00000029082	KMT2E	magenta	0.137888	0.638296	-0.836639	0.000191115
ENSSSCG00000029352	CCNL1	magenta	-0.386352	0.172406	-0.782062	0.000949592
ENSSSCG00000029441		magenta	0.35063	0.219029	0.47062	0.0894358
ENSSSCG00000029785	RPS9	magenta	0.0852242	0.772064	0.888054	2.22e-05
ENSSSCG00000029849	S1PR1	magenta	-0.142183	0.627764	0.773529	0.00117199
ENSSSCG00000029870	WNT3A	magenta	0.689968	0.00631732	0.723597	0.00344062
ENSSSCG00000030123	CDS2	magenta	-0.516972	0.0583573	-0.590772	0.0261088
ENSSSCG00000030147	TRMT61B	magenta	-0.214386	0.461733	-0.569095	0.0336713
ENSSSCG00000030154	RSBN1	magenta	-0.363423	0.201516	-0.58217	0.0289392
ENSSSCG00000030497	YAE1	magenta	-0.436253	0.118887	-0.514186	0.0599663
ENSSSCG00000030585	HOXC6	magenta	0.0387607	0.895336	-0.844791	0.000143215
ENSSSCG00000030672	ZNF692	magenta	0.337979	0.237252	0.607978	0.0210748
ENSSSCG00000030698		magenta	0.214927	0.460576	0.63403	0.0148915
ENSSSCG00000031132	SIVA1	magenta	0.260251	0.368862	0.482863	0.0803047
ENSSSCG00000031267	NIPAL2	magenta	0.0678334	0.817773	-0.820214	0.000327001
ENSSSCG00000031344	AJAP1	magenta	0.0683188	0.81649	0.886772	2.37e-05
ENSSSCG00000031377	U1	magenta	-0.000406511	0.9989	-0.405127	0.150716
ENSSSCG00000031426	ZBTB34	magenta	-0.356527	0.210841	-0.469789	0.0900802
ENSSSCG00000031524	DPPA2	magenta	-0.204517	0.483081	-0.437019	0.118167
ENSSSCG00000031529		magenta	0.0382131	0.896807	-0.806426	0.000493472
ENSSSCG00000031794	TNFAIP8L3	magenta	-0.14831	0.612857	-0.853541	0.000103141
ENSSSCG00000032062	WDR55	magenta	0.112164	0.70264	0.8225	0.000304435
ENSSSCG00000032144	ZNF140	magenta	-0.421159	0.13369	-0.36248	0.202775
ENSSSCG00000032154	ERF	magenta	0.126477	0.666579	-0.832526	0.000219784
ENSSSCG00000032820	BRD1	magenta	0.0278858	0.92461	0.805635	0.000504772
ENSSSCG00000032905		magenta	-0.290047	0.314457	-0.637802	0.0141261
ENSSSCG00000033314	DLX6	magenta	0.381721	0.178051	0.5817	0.0291003
ENSSSCG00000033324	SPATA2	magenta	-0.0168872	0.954307	-0.867311	5.88e-05
ENSSSCG00000033368		magenta	-0.14507	0.620722	0.828435	0.000251656
ENSSSCG00000033614	SNORD88C	magenta	0.189814	0.515722	0.371303	0.191182
ENSSSCG00000033745		magenta	-0.0649895	0.825303	-0.637272	0.0142318
ENSSSCG00000034948	RASSF9	magenta	-0.0341484	0.907739	-0.866945	5.98e-05
ENSSSCG00000035444	ZFP42	magenta	0.456521	0.100821	0.698443	0.0054607
ENSSSCG00000035525		magenta	0.468824	0.0908339	0.695746	0.00572278
ENSSSCG00000035658	VPS36	magenta	0.0728236	0.804596	-0.853595	0.000102926
ENSSSCG00000035967	ZC3H18	magenta	0.436596	0.118564	0.553481	0.0400464
ENSSSCG00000036025		magenta	0.0772882	0.792847	0.575292	0.031362
ENSSSCG00000036113	GSAP	magenta	-0.279397	0.333347	-0.561063	0.036849
ENSSSCG00000036166	U6	magenta	-0.186338	0.523582	-0.518481	0.0574989
ENSSSCG00000036322	SPRY4	magenta	0.211783	0.467319	0.698597	0.00544605
ENSSSCG00000036662	CHRM5	magenta	0.379202	0.181171	0.717788	0.00384387
ENSSSCG00000036669		magenta	0.206545	0.478657	-0.843934	0.000147737
ENSSSCG00000036846		magenta	0.110799	0.706112	-0.810596	0.000437239
ENSSSCG00000036988	PSMG4	magenta	0.396598	0.160332	0.290106	0.314354
ENSSSCG00000037136		magenta	0.38794	0.170497	0.755129	0.00179322
ENSSSCG00000037264	RAB31	magenta	0.0369833	0.900113	-0.893898	1.63e-05
ENSSSCG00000037337	BRSK2	magenta	0.421903	0.132933	0.641768	0.0133541
ENSSSCG00000037423	U6	magenta	0.130531	0.65648	0.505997	0.0648789
ENSSSCG00000037470	SNORA70	magenta	0.137291	0.639764	0.380077	0.180083
ENSSSCG00000037720		magenta	0.0397434	0.892696	-0.519718	0.0568022
ENSSSCG00000037793	NIT1	magenta	0.0400592	0.891848	0.921027	2.95e-06
ENSSSCG00000037920	TRIM28	magenta	0.0738727	0.801831	0.849205	0.000121669
ENSSSCG00000038008	RBM14	magenta	-0.0443432	0.880354	0.860752	7.74e-05
ENSSSCG00000038035		magenta	0.114884	0.695739	0.684282	0.00694819
ENSSSCG00000038171		magenta	-0.0575003	0.845199	-0.826764	0.000265703
ENSSSCG00000038186	TIGD4	magenta	-0.202344	0.487842	-0.842922	0.000153224
ENSSSCG00000038460	FOXF1	magenta	0.201663	0.489339	-0.792774	0.000719566
ENSSSCG00000038494	LPIN2	magenta	-0.0246187	0.933424	0.913259	5.09e-06
ENSSSCG00000038785	CA7	magenta	0.178791	0.540827	0.81365	0.000399415
ENSSSCG00000038950	VARS1	magenta	-0.0850013	0.772646	0.857506	8.83e-05
ENSSSCG00000039185	EPB41L5	magenta	0.23741	0.413773	0.468672	0.0909523
ENSSSCG00000039212	MYT1	magenta	0.38794	0.170497	0.755129	0.00179322
ENSSSCG00000039259		magenta	-0.0990598	0.736176	-0.4272	0.127624
ENSSSCG00000040047	TMEM151B	magenta	0.327391	0.253196	0.647613	0.0122756
ENSSSCG00000040253		magenta	0.336554	0.239362	0.808063	0.000470746
ENSSSCG00000040431	CRYGS	magenta	-0.283582	0.32585	-0.399922	0.156538
ENSSSCG00000040570	C11orf58	magenta	0.0579009	0.844133	-0.814083	0.000394265
ENSSSCG00000040620		magenta	0.308209	0.283689	0.397771	0.158987
ENSSSCG00000040650		magenta	-0.0131375	0.964447	-0.901298	1.08e-05
ENSSSCG00000040687	CDH8	magenta	0.321345	0.262583	0.441314	0.114184
ENSSSCG00000040735	DDAH1	magenta	-0.0391925	0.894176	-0.807122	0.0004837
ENSSSCG00000040903		magenta	0.38794	0.170497	0.755129	0.00179322
ENSSSCG00000041010		magenta	-0.116405	0.691891	0.39996	0.156494
ENSSSCG00000041158		magenta	0.105539	0.719537	-0.481962	0.080953
ENSSSCG00000041183		magenta	0.437692	0.117536	0.716143	0.00396462
ENSSSCG00000041231		magenta	-0.205312	0.481343	-0.385574	0.173346
ENSSSCG00000041254		magenta	-0.191571	0.51177	-0.920706	3.02e-06
ENSSSCG00000041352		magenta	0.38794	0.170497	0.755129	0.00179322
ENSSSCG00000041370		magenta	-0.00702723	0.980979	-0.914434	4.7e-06
ENSSSCG00000041432		magenta	-0.514671	0.0596838	-0.58899	0.0266772
ENSSSCG00000041566		magenta	-0.0514302	0.861389	-0.945622	3.32e-07
ENSSSCG00000041594		magenta	0.136998	0.640484	-0.786047	0.000858021
ENSSSCG00000041622		magenta	0.218619	0.452719	0.686529	0.00669333
ENSSSCG00000041685		magenta	-0.462464	0.0959062	-0.413975	0.141151
ENSSSCG00000041767		magenta	-0.269267	0.351891	-0.381487	0.178339
ENSSSCG00000041867		magenta	0.434288	0.120748	0.581886	0.0290365
ENSSSCG00000041913		magenta	0.45209	0.104597	0.65659	0.0107509
ENSSSCG00000042062		magenta	0.399651	0.156845	0.540491	0.045992
ENSSSCG00000042173		magenta	-0.087639	0.765768	-0.862816	7.11e-05
ENSSSCG00000042185		magenta	-0.0631366	0.830217	-0.925741	2.06e-06
ENSSSCG00000042305		magenta	-0.103699	0.724249	-0.219132	0.451633
ENSSSCG00000042464		magenta	0.308575	0.283087	0.69709	0.00559102
ENSSSCG00000042465		magenta	0.308039	0.283967	0.539097	0.0466665
ENSSSCG00000042479		magenta	0.313633	0.274856	0.631923	0.0153326
ENSSSCG00000042564		magenta	0.067451	0.818785	0.474638	0.0863628
ENSSSCG00000042609		magenta	0.421974	0.132861	0.514009	0.0600695
ENSSSCG00000042788		magenta	-0.271842	0.347124	-0.375966	0.18523
ENSSSCG00000043000		magenta	-0.18598	0.524393	-0.576115	0.0310644
ENSSSCG00000043198		magenta	0.0101234	0.9726	-0.524433	0.0542026
ENSSSCG00000043374		magenta	0.209679	0.471858	0.407488	0.148123
ENSSSCG00000043414		magenta	0.329763	0.249569	0.574924	0.0314958
ENSSSCG00000043523		magenta	-0.357664	0.209286	-0.656362	0.0107877
ENSSSCG00000043638		magenta	0.260986	0.367461	0.414046	0.141076
ENSSSCG00000043653		magenta	0.527504	0.0525558	0.48892	0.0760388
ENSSSCG00000043799		magenta	0.158183	0.589125	-0.84318	0.000151808
ENSSSCG00000043968		magenta	-0.223297	0.44286	-0.676623	0.00787411
ENSSSCG00000043995		magenta	-0.478291	0.0836337	-0.592569	0.0255448
ENSSSCG00000044200		magenta	0.39195	0.165738	0.381514	0.178306
ENSSSCG00000044283		magenta	0.0859449	0.770184	-0.87815	3.62e-05
ENSSSCG00000044336		magenta	-0.444424	0.111358	-0.552186	0.0406122
ENSSSCG00000044403		magenta	0.245858	0.396846	0.413451	0.141706
ENSSSCG00000044437		magenta	-0.349204	0.221039	-0.611252	0.0202065
ENSSSCG00000044439		magenta	0.110188	0.707666	0.346433	0.224974
ENSSSCG00000044456		magenta	-0.308551	0.283127	-0.479061	0.0830667
ENSSSCG00000044488		magenta	0.527504	0.0525558	0.48892	0.0760388
ENSSSCG00000044571		magenta	-0.32168	0.262058	-0.523475	0.0547235
ENSSSCG00000044603		magenta	0.0801688	0.785287	0.542923	0.0448331
ENSSSCG00000044752		magenta	-0.431561	0.123363	-0.662894	0.00977043
ENSSSCG00000044910		magenta	0.336104	0.24003	0.665553	0.00937827
ENSSSCG00000044924		magenta	-0.0945915	0.747716	-0.368741	0.194504
ENSSSCG00000045023		magenta	0.674944	0.00808934	0.530603	0.0509318
ENSSSCG00000045084		magenta	0.00402278	0.989111	-0.902285	1.02e-05
ENSSSCG00000045199		magenta	0.38794	0.170497	0.755129	0.00179322
ENSSSCG00000045254		magenta	0.160435	0.583763	0.773164	0.00118237
ENSSSCG00000045347		magenta	0.356329	0.211114	0.811425	0.00042669
ENSSSCG00000045480		magenta	-0.287724	0.318523	-0.441664	0.113864
ENSSSCG00000045498		magenta	0.183602	0.529805	-0.801169	0.000572525
ENSSSCG00000045623		magenta	-0.344123	0.228289	-0.367271	0.196427
ENSSSCG00000045678		magenta	-0.146534	0.617165	-0.398993	0.157592
ENSSSCG00000045693		magenta	-0.611304	0.020193	-0.517888	0.0578351
ENSSSCG00000045713		magenta	0.478373	0.0835729	0.603639	0.0222685
ENSSSCG00000045822		magenta	0.267269	0.355614	0.585779	0.027725
ENSSSCG00000046136		magenta	0.372574	0.189548	0.613424	0.0196456
ENSSSCG00000046144		magenta	-0.0463451	0.87499	-0.504347	0.065903
ENSSSCG00000046171		magenta	0.0301468	0.918515	-0.759149	0.00163921
ENSSSCG00000046366		magenta	-0.0562153	0.848622	-0.377475	0.18333
ENSSSCG00000046527		magenta	0.0341253	0.907801	0.297334	0.301891
ENSSSCG00000046791		magenta	0.0561557	0.848781	-0.495954	0.0712894
ENSSSCG00000047248		magenta	-0.0535415	0.855752	-0.308266	0.283594
ENSSSCG00000047304	OR2B6	magenta	0.349279	0.220932	0.591513	0.0258751
ENSSSCG00000047723		magenta	0.171332	0.558108	0.461355	0.096811
ENSSSCG00000047793		magenta	-0.263194	0.363273	-0.505056	0.0654615
ENSSSCG00000047829		magenta	-0.234887	0.4189	-0.557707	0.0382401
ENSSSCG00000048066		magenta	-0.506482	0.0645801	-0.611625	0.0201095
ENSSSCG00000048227		magenta	0.380633	0.179395	0.66202	0.00990201
ENSSSCG00000048285		magenta	-0.209532	0.472174	-0.456343	0.100972
ENSSSCG00000048324		magenta	0.0317325	0.914243	-0.801248	0.000571271
ENSSSCG00000048340		magenta	0.483223	0.0800459	0.69418	0.00587942
ENSSSCG00000048383		magenta	0.380633	0.179395	0.66202	0.00990201
ENSSSCG00000048526		magenta	0.348334	0.22227	0.848083	0.000126877
ENSSSCG00000048528		magenta	-0.324333	0.257918	-0.54114	0.0456808
ENSSSCG00000048576		magenta	0.490711	0.074809	0.786977	0.000837704
ENSSSCG00000048649		magenta	0.100543	0.732358	0.45033	0.106124
ENSSSCG00000049084		magenta	-0.000406511	0.9989	-0.405127	0.150716
ENSSSCG00000049102		magenta	0.0772882	0.792847	0.575292	0.031362
ENSSSCG00000049160		magenta	-0.0395619	0.893184	-0.837038	0.000188502
ENSSSCG00000049198		magenta	-0.117405	0.689362	-0.464661	0.0941324
ENSSSCG00000049203		magenta	0.00661931	0.982083	0.259448	0.370394
ENSSSCG00000049407		magenta	0.221362	0.446925	-0.86522	6.43e-05
ENSSSCG00000049465		magenta	0.0567071	0.847312	-0.811861	0.000421229
ENSSSCG00000049696		magenta	0.0620924	0.832989	-0.847646	0.000128956
ENSSSCG00000049758		magenta	-0.264532	0.360748	-0.392182	0.165466
ENSSSCG00000049927		magenta	0.118809	0.685821	0.593885	0.0251374
ENSSSCG00000049969		magenta	0.104806	0.721414	0.395891	0.161147
ENSSSCG00000050014	MRPS16	magenta	-0.281482	0.3296	-0.825029	0.000280952
ENSSSCG00000050118		magenta	-0.413699	0.141444	-0.498535	0.0696008
ENSSSCG00000050136		magenta	0.38794	0.170497	0.755129	0.00179322
ENSSSCG00000050163		magenta	0.0275039	0.92564	0.463807	0.0948189
ENSSSCG00000050334		magenta	0.479855	0.0824842	0.539508	0.0464667
ENSSSCG00000050346		magenta	0.250015	0.388651	0.516603	0.0585684
ENSSSCG00000050520		magenta	-0.0916113	0.75544	-0.612498	0.0198832
ENSSSCG00000050565		magenta	0.0493009	0.86708	-0.433163	0.121823
ENSSSCG00000050649		magenta	0.206544	0.478658	0.554333	0.0396773
ENSSSCG00000050732		magenta	0.0515841	0.860978	-0.322974	0.260034
ENSSSCG00000050780		magenta	0.39913	0.157437	0.59136	0.025923
ENSSSCG00000050786		magenta	0.200967	0.490872	0.333188	0.244388
ENSSSCG00000050919		magenta	0.372927	0.189096	0.477356	0.084326
ENSSSCG00000050933		magenta	0.505843	0.0649739	0.535448	0.0484653
ENSSSCG00000050936		magenta	0.149114	0.61091	-0.435814	0.119301
ENSSSCG00000051018		magenta	0.0527356	0.857903	0.546431	0.0431987
ENSSSCG00000051152		magenta	-0.340803	0.233106	-0.596429	0.024364
ENSSSCG00000051278		magenta	0.235134	0.418396	0.72193	0.00355278
ENSSSCG00000051301		magenta	-0.0997784	0.734325	-0.92321	2.5e-06
ENSSSCG00000051376		magenta	0.221573	0.446483	0.403529	0.152488
ENSSSCG00000051442		magenta	-0.149881	0.609056	-0.917138	3.9e-06
ENSSSCG00000051549		magenta	0.183401	0.530263	0.219759	0.450307
ENSSSCG00000051612		magenta	0.274883	0.341542	0.502228	0.0672343
ENSSSCG00000051618		magenta	0.0267966	0.927548	-0.831908	0.000224374
ENSSSCG00000051637		magenta	0.0332152	0.910251	-0.875202	4.15e-05
ENSSSCG00000051701		magenta	0.0728234	0.804596	-0.872727	4.64e-05
ENSSSCG00000051707		magenta	0.071504	0.808076	-0.720396	0.00365846
ENSSSCG00000051726		magenta	0.319088	0.26614	0.635695	0.0145497
ENSSSCG00000051754		magenta	-0.0208903	0.94349	-0.792832	0.000718469
ENSSSCG00000051794	CHRNB1	magenta	0.0661112	0.822332	-0.841336	0.000162154

## Sheet: Module Blue
Ensemble ID	Gene name	Module color	GS	GS p-value	MM	MM p-value
ENSSSCG00000043129		blue	-0.870362	5.15318e-05	0.728937	0.00309996
ENSSSCG00000037053	AK6	blue	-0.859587	8.11983e-05	0.666134	0.00929418
ENSSSCG00000002451	RIN3	blue	0.851627	0.000111015	-0.589702	0.026449
ENSSSCG00000034810	PEF1	blue	0.834043	0.000208829	-0.713098	0.00419581
ENSSSCG00000044256		blue	-0.833848	0.000210209	0.592498	0.0255667
ENSSSCG00000050499		blue	-0.828228	0.000253358	0.786464	0.000848867
ENSSSCG00000003053	BSP1	blue	0.825941	0.000272848	-0.640344	0.0136274
ENSSSCG00000023747	TTC19	blue	0.825103	0.000280282	-0.510115	0.0623737
ENSSSCG00000046702		blue	-0.823455	0.000295393	0.415462	0.139585
ENSSSCG00000022554	MATN1	blue	0.821866	0.000310568	-0.606695	0.0214226
ENSSSCG00000008850		blue	-0.81237	0.000414928	0.660832	0.0100832
ENSSSCG00000007482		blue	0.804512	0.000521165	-0.418574	0.136344
ENSSSCG00000029186	SEZ6L2	blue	0.7989	0.000609646	-0.500874	0.0680952
ENSSSCG00000048176		blue	0.797366	0.000635804	-0.535861	0.0482594
ENSSSCG00000007647	TRAPPC14	blue	0.793683	0.000702331	-0.514461	0.059806
ENSSSCG00000001762	CIB2	blue	0.793027	0.000714743	-0.624643	0.0169335
ENSSSCG00000040466		blue	0.789727	0.000779866	-0.357398	0.20965
ENSSSCG00000003987		blue	0.78799	0.000816013	-0.817986	0.000350284
ENSSSCG00000022286	ssc-mir-26a	blue	-0.779833	0.00100414	0.46603	0.0930383
ENSSSCG00000007398		blue	0.779243	0.00101896	-0.670792	0.00864105
ENSSSCG00000006038	ZFPM2	blue	0.776516	0.00108987	-0.607136	0.0213027
ENSSSCG00000003055	XRCC1	blue	0.773828	0.00116357	-0.465426	0.0935204
ENSSSCG00000042275		blue	-0.768462	0.00132254	0.396691	0.160225
ENSSSCG00000010465	TNKS2	blue	-0.760092	0.00160463	0.584696	0.0280852
ENSSSCG00000014578	DENND5A	blue	0.759474	0.00162723	-0.737305	0.00262016
ENSSSCG00000041437		blue	0.756494	0.00173968	-0.442816	0.112813
ENSSSCG00000002854	POP4	blue	-0.753813	0.00184607	0.540434	0.0460195
ENSSSCG00000001057	MCUR1	blue	-0.753553	0.00185667	0.278153	0.335593
ENSSSCG00000026536	DCUN1D2	blue	-0.75295	0.0018814	0.650941	0.0116922
ENSSSCG00000021837	STYXL1	blue	0.749588	0.00202415	-0.614298	0.0194234
ENSSSCG00000003421	FBXO6	blue	0.747062	0.00213692	-0.533953	0.0492169
ENSSSCG00000045936		blue	0.745529	0.00220774	-0.653957	0.011182
ENSSSCG00000009138		blue	0.744222	0.00226961	-0.55074	0.0412511
ENSSSCG00000003352		blue	0.741793	0.00238819	-0.363754	0.201075
ENSSSCG00000037101	LRRC8B	blue	-0.740937	0.00243116	0.709116	0.00451406
ENSSSCG00000038500	TRIB1	blue	0.739696	0.00249446	-0.751462	0.00194356
ENSSSCG00000036027	TPRN	blue	0.739398	0.00250986	-0.666812	0.00919679
ENSSSCG00000005652	GLE1	blue	0.733833	0.00281153	-0.452632	0.10413
ENSSSCG00000015847	MBOAT4	blue	-0.733449	0.00283339	0.560209	0.0371993
ENSSSCG00000038095		blue	-0.731834	0.00292662	0.4224	0.132428
ENSSSCG00000024912	WDR5	blue	0.730364	0.00301361	-0.435554	0.119547
ENSSSCG00000047610		blue	-0.730264	0.00301959	0.819507	0.000334255
ENSSSCG00000022145	RPF1	blue	-0.729572	0.00306127	0.873093	4.56315e-05
ENSSSCG00000045744		blue	-0.726785	0.0032339	0.390451	0.167507
ENSSSCG00000044501		blue	0.726769	0.00323487	-0.6331	0.015085
ENSSSCG00000002908	ZBTB32	blue	0.725574	0.00331126	-0.419397	0.135495
ENSSSCG00000017475	RARA	blue	0.725488	0.00331678	-0.736716	0.00265188
ENSSSCG00000048817		blue	0.724586	0.00337537	-0.797452	0.000634319
ENSSSCG00000024636	TGFBRAP1	blue	0.724425	0.00338593	-0.665026	0.00945499
ENSSSCG00000014011	RASGEF1C	blue	-0.723902	0.00342036	0.535586	0.0483964
ENSSSCG00000047361		blue	0.722194	0.00353479	-0.836097	0.000194706
ENSSSCG00000004819	CERS3	blue	-0.721411	0.00358824	0.595284	0.0247099
ENSSSCG00000009050	INPP4B	blue	-0.72119	0.00360349	0.830443	0.000235574
ENSSSCG00000031649	RNASE1	blue	0.717506	0.00386435	-0.596479	0.024349
ENSSSCG00000049665		blue	0.716133	0.00396536	-0.496537	0.0709052
ENSSSCG00000050385		blue	0.715704	0.0039973	-0.600879	0.0230541
ENSSSCG00000017678	APPBP2	blue	-0.713464	0.00416747	0.865086	6.4692e-05
ENSSSCG00000039139	AKT1	blue	0.710007	0.00444122	-0.88336	2.81496e-05
ENSSSCG00000050771		blue	-0.709541	0.0044792	0.691586	0.00614618
ENSSSCG00000036551		blue	0.708335	0.00457859	-0.6078	0.0211228
ENSSSCG00000047011		blue	-0.706013	0.00477484	0.684783	0.00689067
ENSSSCG00000041952		blue	-0.705603	0.00481013	0.675008	0.00808102
ENSSSCG00000038584	FGF12	blue	-0.705081	0.00485548	0.511541	0.0615227
ENSSSCG00000010853	EPHX1	blue	0.705006	0.00486197	-0.728916	0.00310125
ENSSSCG00000035505	YTHDC1	blue	-0.70467	0.00489129	0.871626	4.87283e-05
ENSSSCG00000006542	KCNN3	blue	0.704148	0.00493715	-0.775788	0.00110946
ENSSSCG00000013600	RAB11B	blue	0.700391	0.00527726	-0.755848	0.00176487
ENSSSCG00000004728	CAPN3	blue	0.699763	0.00533593	-0.350096	0.21978
ENSSSCG00000001403	LTA	blue	-0.697547	0.00554675	0.318536	0.267016
ENSSSCG00000039541	ANKRD11	blue	0.696652	0.00563372	-0.662072	0.00989427
ENSSSCG00000012774	DUSP9	blue	0.695697	0.00572761	-0.718651	0.00378177
ENSSSCG00000050965		blue	0.693814	0.00591648	-0.702283	0.00510383
ENSSSCG00000043627		blue	0.692628	0.00603792	-0.554002	0.0398206
ENSSSCG00000003931	KIF2C	blue	-0.692212	0.00608101	0.670998	0.00861295
ENSSSCG00000031140		blue	-0.690005	0.00631336	0.525702	0.0535176
ENSSSCG00000021644	BRD7	blue	-0.689298	0.00638921	0.805236	0.000510559
ENSSSCG00000045060		blue	-0.68914	0.0064063	0.519578	0.056881
ENSSSCG00000038955	CAMLG	blue	-0.68659	0.00668648	0.812491	0.000413439
ENSSSCG00000037334	ADSS1	blue	0.686338	0.00671462	-0.569365	0.033568
ENSSSCG00000032578	TNFRSF17	blue	-0.686154	0.00673532	0.496423	0.0709805
ENSSSCG00000046003	TSC1	blue	0.681354	0.00729162	-0.724274	0.00339584
ENSSSCG00000046843		blue	-0.679102	0.00756461	0.791306	0.000748141
ENSSSCG00000040199	AFG1L	blue	-0.677251	0.00779476	0.603041	0.022437
ENSSSCG00000044385		blue	0.676671	0.00786801	-0.523087	0.0549354
ENSSSCG00000042949		blue	0.676435	0.00789798	-0.500548	0.0683035
ENSSSCG00000039045	SLC26A2	blue	0.676258	0.00792054	-0.504307	0.0659277
ENSSSCG00000008221	KDM3A	blue	-0.67228	0.00844004	0.707236	0.00467069
ENSSSCG00000027792	NOPCHAP1	blue	-0.672113	0.00846243	0.768038	0.00133582
ENSSSCG00000042434		blue	-0.671539	0.00853966	0.840302	0.000168203
ENSSSCG00000000847	TDG	blue	-0.671448	0.00855204	0.714064	0.00412133
ENSSSCG00000045184		blue	-0.669385	0.00883442	0.551636	0.0408546
ENSSSCG00000043157		blue	-0.669016	0.00888568	0.693439	0.00595469
ENSSSCG00000002863	LRP3	blue	0.666826	0.00919475	-0.345301	0.226595
ENSSSCG00000046652		blue	-0.664743	0.00949635	0.367156	0.196577
ENSSSCG00000028807		blue	-0.664397	0.00954723	0.400679	0.155682
ENSSSCG00000021648		blue	0.663626	0.00966126	-0.560581	0.0370464
ENSSSCG00000027165	UBE2G2	blue	0.663349	0.00970243	-0.810231	0.000441938
ENSSSCG00000006987	SLC7A2	blue	-0.663347	0.00970267	0.612502	0.0198822
ENSSSCG00000014813	PHOX2A	blue	0.661581	0.00996867	-0.553807	0.0399048
ENSSSCG00000014799		blue	0.661103	0.0100417	-0.440459	0.11497
ENSSSCG00000013369		blue	0.657359	0.0106274	-0.270505	0.349594
ENSSSCG00000015883	MARCHF7	blue	-0.656791	0.0107184	0.611664	0.0200994
ENSSSCG00000007801	ZNF48	blue	0.654824	0.0110386	-0.766581	0.0013822
ENSSSCG00000026886	DCHS2	blue	0.65466	0.0110656	-0.614679	0.0193269
ENSSSCG00000010109	SCARF2	blue	0.654503	0.0110916	-0.542893	0.0448469
ENSSSCG00000037929	H2BC11	blue	-0.654369	0.0111136	0.407036	0.148617
ENSSSCG00000016606	ASB15	blue	-0.653516	0.0112555	0.887689	2.26532e-05
ENSSSCG00000003419	MAD2L2	blue	0.65335	0.0112833	-0.768225	0.00132997
ENSSSCG00000011968	NIT2	blue	-0.653342	0.0112847	0.876829	3.8465e-05
ENSSSCG00000000663	KLRG1	blue	-0.652846	0.0113679	0.519137	0.0571287
ENSSSCG00000008140	SLC5A7	blue	-0.651687	0.0115644	0.607995	0.0210703
ENSSSCG00000046151		blue	-0.65128	0.0116339	0.673712	0.00825005
ENSSSCG00000015258	GLB1L2	blue	0.651206	0.0116467	-0.533171	0.0496133
ENSSSCG00000040738	DYNC1H1	blue	0.651105	0.0116639	-0.828323	0.000252578
ENSSSCG00000031264	ssc-mir-2411	blue	-0.650829	0.0117114	0.503327	0.0665413
ENSSSCG00000031432	KDELR2	blue	-0.649194	0.0119957	0.598888	0.0236334
ENSSSCG00000009568	ZMYM5	blue	-0.648705	0.0120817	0.570946	0.0329688
ENSSSCG00000016986	CREBRF	blue	-0.644648	0.012814	0.655237	0.0109709
ENSSSCG00000016095	CLK1	blue	-0.644308	0.0128769	0.824259	0.000287944
ENSSSCG00000000920	POC1B	blue	0.643674	0.0129947	-0.680867	0.00734992
ENSSSCG00000032749	PCDH18	blue	0.642748	0.0131684	-0.725686	0.00330404
ENSSSCG00000031321	NR4A1	blue	0.641799	0.013348	-0.618185	0.0184573
ENSSSCG00000038657	ATPAF1	blue	-0.640283	0.0136393	0.704617	0.00489597
ENSSSCG00000030917		blue	-0.639251	0.0138401	0.675675	0.00799515
ENSSSCG00000008217	CD8A	blue	-0.638674	0.0139534	0.798494	0.000616471
ENSSSCG00000017472	IGFBP4	blue	-0.638389	0.0140097	0.588458	0.0268489
ENSSSCG00000014570	NRIP3	blue	-0.637813	0.0141238	0.353052	0.215643
ENSSSCG00000039655	TAFAZZIN	blue	0.637307	0.0142247	-0.743297	0.00231422
ENSSSCG00000032731	NDST1	blue	-0.63728	0.0142301	0.784969	0.000882065
ENSSSCG00000051681		blue	-0.636962	0.0142938	0.573217	0.0321219
ENSSSCG00000045507		blue	-0.636674	0.0143516	0.525103	0.0538399
ENSSSCG00000050293		blue	-0.636645	0.0143576	0.474893	0.0861701
ENSSSCG00000039144		blue	0.636167	0.014454	-0.39012	0.1679
ENSSSCG00000030438		blue	-0.634489	0.0147967	0.434916	0.120151
ENSSSCG00000044013		blue	-0.633162	0.015072	0.8699	5.25897e-05
ENSSSCG00000006213		blue	0.632967	0.0151127	-0.863674	6.86424e-05
ENSSSCG00000017230	TMEM104	blue	0.632635	0.0151824	-0.740879	0.00243406
ENSSSCG00000013751	NACC1	blue	0.63256	0.015198	-0.543897	0.0443748
ENSSSCG00000048760		blue	0.632135	0.0152877	-0.549762	0.0416873
ENSSSCG00000015489	SLC9C2	blue	-0.630811	0.0155693	0.546182	0.043313
ENSSSCG00000031664	SRP9	blue	-0.63014	0.0157134	0.747384	0.00212228
ENSSSCG00000005166	MLLT3	blue	0.630133	0.015715	-0.474143	0.086737
ENSSSCG00000043343		blue	-0.62939	0.0158759	0.441804	0.113736
ENSSSCG00000013553	VAV1	blue	0.629231	0.0159104	-0.875619	4.06779e-05
ENSSSCG00000051243		blue	-0.628766	0.0160119	0.647574	0.0122825
ENSSSCG00000044435		blue	-0.628279	0.0161187	0.558538	0.0378919
ENSSSCG00000041416		blue	-0.628047	0.0161699	0.814871	0.000385053
ENSSSCG00000031530	DERL2	blue	0.627827	0.0162185	-0.607475	0.0212107
ENSSSCG00000010681	SFXN4	blue	-0.627633	0.0162613	0.745889	0.00219096
ENSSSCG00000017445		blue	0.626957	0.0164114	-0.855611	9.51445e-05
ENSSSCG00000007745	SUMF2	blue	0.626858	0.0164336	-0.471872	0.0884699
ENSSSCG00000015868	ARL6IP6	blue	0.626276	0.0165638	-0.74471	0.00224636
ENSSSCG00000031541	ARL5A	blue	-0.624951	0.0168633	0.575002	0.0314675
ENSSSCG00000027528	TMEM107	blue	0.62463	0.0169364	-0.734588	0.002769
ENSSSCG00000047217		blue	-0.623278	0.0172474	0.677138	0.00780902
ENSSSCG00000033074	ZCCHC24	blue	0.622138	0.0175128	-0.71446	0.0040911
ENSSSCG00000035409		blue	-0.62067	0.0178592	0.796215	0.000656019
ENSSSCG00000034567		blue	0.620178	0.0179765	-0.791405	0.000746184
ENSSSCG00000015474	PPFIA4	blue	0.620141	0.0179852	-0.632178	0.0152787
ENSSSCG00000007607	KPNA7	blue	0.619767	0.0180749	-0.637277	0.0142307
ENSSSCG00000014267		blue	-0.619356	0.0181735	0.835217	0.000200658
ENSSSCG00000004745	RPAP1	blue	-0.619116	0.0182314	0.71212	0.00427234
ENSSSCG00000011395	RBM5	blue	-0.618809	0.0183057	0.568087	0.0340587
ENSSSCG00000032262	IDUA	blue	0.618342	0.0184192	-0.42369	0.131125
ENSSSCG00000014414		blue	-0.61828	0.0184342	0.83262	0.000219091
ENSSSCG00000038694	CCND2	blue	-0.616086	0.0189742	0.845265	0.000140763
ENSSSCG00000011956	TRMT10C	blue	-0.615733	0.0190624	0.8024	0.00055316
ENSSSCG00000036685		blue	-0.615591	0.0190979	0.685292	0.00683265
ENSSSCG00000048121		blue	-0.615591	0.0190979	0.685292	0.00683265
ENSSSCG00000009181	C4orf17	blue	-0.615013	0.0192428	0.784934	0.00088287
ENSSSCG00000044601		blue	-0.613643	0.0195897	0.853616	0.000102842
ENSSSCG00000047488		blue	-0.613072	0.0197358	0.644951	0.0127582
ENSSSCG00000004753	INO80	blue	-0.612876	0.0197859	0.25369	0.381482
ENSSSCG00000010648	CCDC186	blue	-0.611381	0.0201729	0.947295	2.76091e-07
ENSSSCG00000035069	CHSY3	blue	0.611033	0.0202638	-0.864912	6.51683e-05
ENSSSCG00000046475		blue	0.610563	0.0203871	-0.574959	0.031483
ENSSSCG00000013040	TRPT1	blue	0.609981	0.0205404	-0.80258	0.000550369
ENSSSCG00000029715	OLFM1	blue	0.609562	0.0206515	-0.625232	0.0167995
ENSSSCG00000002690	GAN	blue	-0.609482	0.0206727	0.487909	0.0767397
ENSSSCG00000019069		blue	-0.609053	0.0207868	0.659589	0.0102754
ENSSSCG00000033249		blue	-0.608874	0.0208346	0.570948	0.032968
ENSSSCG00000050754		blue	-0.608572	0.0209153	0.440741	0.11471
ENSSSCG00000010833	TAF1A	blue	-0.608182	0.02102	0.779589	0.00101025
ENSSSCG00000014632	FHIP1B	blue	0.607368	0.0212397	-0.912442	5.3746e-06
ENSSSCG00000010402	ZFAND4	blue	-0.606244	0.0215459	0.500332	0.0684422
ENSSSCG00000031580	LLPH	blue	-0.60459	0.0220027	0.85709	8.97449e-05
ENSSSCG00000022553	TNRC18	blue	0.60411	0.0221365	-0.892174	1.79185e-05
ENSSSCG00000045529	DNAH6	blue	-0.604024	0.0221607	0.43766	0.117567
ENSSSCG00000050664		blue	0.603833	0.0222141	-0.869211	5.41983e-05
ENSSSCG00000004498	HAUS1	blue	-0.60363	0.0222712	0.637267	0.0142327
ENSSSCG00000046415		blue	-0.602941	0.0224654	0.377797	0.182927
ENSSSCG00000009642	STC1	blue	0.602415	0.0226143	-0.540091	0.046185
ENSSSCG00000035739	SLC26A1	blue	0.601818	0.0227844	-0.599844	0.0233538
ENSSSCG00000009049	USP38	blue	-0.601737	0.0228077	0.922886	2.56687e-06
ENSSSCG00000046806		blue	0.599784	0.0233712	-0.773701	0.00116716
ENSSSCG00000036914	C9orf116	blue	0.599776	0.0233736	-0.498191	0.069824
ENSSSCG00000030030	FBH1	blue	0.597506	0.0240419	-0.728251	0.00314219
ENSSSCG00000010897	ZBTB41	blue	-0.597186	0.0241372	0.530367	0.0510541
ENSSSCG00000017143	CEP131	blue	0.595838	0.024542	-0.674666	0.00812541
ENSSSCG00000035812	AMH	blue	0.595257	0.0247178	-0.340606	0.233393
ENSSSCG00000035595	HMCN1	blue	-0.594966	0.0248065	0.892351	1.77498e-05
ENSSSCG00000001499	DST	blue	0.592989	0.0254142	-0.660226	0.0101765
ENSSSCG00000007599	LMTK2	blue	0.59291	0.0254385	-0.785048	0.000880293
ENSSSCG00000010999	SMU1	blue	-0.592688	0.0255077	0.877812	3.67405e-05
ENSSSCG00000010133	ARVCF	blue	0.592515	0.0255615	-0.825311	0.000278421
ENSSSCG00000010102	SLC7A4	blue	0.592319	0.0256227	-0.899663	1.18302e-05
ENSSSCG00000042666		blue	-0.591706	0.0258145	0.858351	8.53415e-05
ENSSSCG00000041219		blue	-0.59156	0.0258602	0.683285	0.00706367
ENSSSCG00000017517	TBX21	blue	-0.590648	0.0261481	0.479684	0.0826091
ENSSSCG00000032978		blue	0.590574	0.0261716	-0.790344	0.000767346
ENSSSCG00000040365	CLBA1	blue	0.590089	0.0263257	-0.696157	0.00568229
ENSSSCG00000022479	UBR5	blue	-0.589653	0.0264649	0.701904	0.00513823
ENSSSCG00000034572		blue	-0.588915	0.0267013	0.652263	0.0114665
ENSSSCG00000027928	TMEM9	blue	0.588159	0.0269455	-0.830184	0.000237603
ENSSSCG00000029413	DNMT3A	blue	0.587736	0.0270828	-0.69983	0.0053296
ENSSSCG00000007185	SIRPB2	blue	0.587714	0.0270901	-0.562658	0.0362011
ENSSSCG00000016438	NUB1	blue	-0.587556	0.0271414	0.861511	7.50737e-05
ENSSSCG00000049525		blue	0.586808	0.0273862	-0.770176	0.00127
ENSSSCG00000011394	RBM6	blue	-0.586267	0.0275639	0.78466	0.000889071
ENSSSCG00000006051	CTHRC1	blue	-0.586209	0.027583	0.739849	0.00248657
ENSSSCG00000010261	PPA1	blue	-0.586048	0.0276364	0.87579	4.03594e-05
ENSSSCG00000010113	TSSK2	blue	-0.585472	0.0278269	0.526171	0.053266
ENSSSCG00000029745	FAM193A	blue	0.585462	0.0278304	-0.891808	1.82718e-05
ENSSSCG00000011377	LAMB2	blue	0.585229	0.0279076	-0.932131	1.21756e-06
ENSSSCG00000003428	MTHFR	blue	0.585226	0.0279087	-0.801534	0.000566731
ENSSSCG00000004595	ADAM10	blue	-0.585121	0.0279435	0.580196	0.0296196
ENSSSCG00000037132	POU2F2	blue	-0.584955	0.0279988	0.832919	0.000216905
ENSSSCG00000040879	CNBP	blue	-0.584755	0.0280657	0.845625	0.000138926
ENSSSCG00000011036	STAM	blue	-0.584746	0.0280686	0.760137	0.00160299
ENSSSCG00000017290	STRADA	blue	-0.584545	0.028136	0.827023	0.000263485
ENSSSCG00000018056	SRCIN1	blue	0.583798	0.0283868	-0.907962	7.17908e-06
ENSSSCG00000043260		blue	0.583623	0.0284457	-0.644615	0.01282
ENSSSCG00000013391	PSMA1	blue	-0.583313	0.0285504	0.879511	3.39089e-05
ENSSSCG00000007727	AUTS2	blue	0.582398	0.0288615	-0.718698	0.00377837
ENSSSCG00000038953	UBE2B	blue	-0.582077	0.0289711	0.885953	2.47411e-05
ENSSSCG00000015309	MTERF1	blue	-0.581865	0.0290435	0.88039	3.25156e-05
ENSSSCG00000050303		blue	-0.581162	0.0292851	0.840905	0.000164656
ENSSSCG00000038886	CAGE1	blue	0.581055	0.0293221	-0.580296	0.0295851
ENSSSCG00000041102		blue	0.580895	0.0293775	-0.862496	7.20865e-05
ENSSSCG00000001934	SEC23A	blue	-0.580635	0.0294673	0.857662	8.77264e-05
ENSSSCG00000003489	EMC1	blue	-0.580456	0.0295293	0.711143	0.00434976
ENSSSCG00000021042	BRWD1	blue	-0.579977	0.029696	0.858612	8.44525e-05
ENSSSCG00000030477	SNORA61	blue	-0.579297	0.0299338	0.481575	0.0812324
ENSSSCG00000014278	IL5	blue	-0.578064	0.0303681	0.510776	0.0619786
ENSSSCG00000051033		blue	0.577989	0.0303945	-0.637261	0.0142339
ENSSSCG00000045265		blue	-0.57766	0.0305114	0.618847	0.0182966
ENSSSCG00000033180	PSMD10	blue	-0.577315	0.0306344	0.781249	0.000969211
ENSSSCG00000003715	ZNF521	blue	0.576798	0.0308192	-0.6425	0.0132151
ENSSSCG00000048742		blue	0.5767	0.0308544	-0.445736	0.11018
ENSSSCG00000039473		blue	-0.576227	0.0310243	0.86738	5.86689e-05
ENSSSCG00000039550	EMC4	blue	-0.575632	0.0312387	0.506593	0.0645124
ENSSSCG00000046656		blue	0.574675	0.0315865	-0.329526	0.24993
ENSSSCG00000005047	CDKN3	blue	-0.574378	0.0316951	0.596441	0.0243602
ENSSSCG00000048254		blue	0.573963	0.031847	-0.308336	0.28348
ENSSSCG00000035893		blue	-0.573835	0.031894	0.858775	8.39e-05
ENSSSCG00000005645	TRUB2	blue	0.573784	0.031913	-0.806865	0.000487291
ENSSSCG00000013498	EBI3	blue	0.572901	0.0322387	-0.599044	0.0235876
ENSSSCG00000040789	GPR52	blue	0.571499	0.0327609	-0.747965	0.00209606
ENSSSCG00000031769	CTTN	blue	0.570561	0.0331139	-0.901164	1.08437e-05
ENSSSCG00000014819	ATG16L2	blue	0.570341	0.0331972	-0.587422	0.0271852
ENSSSCG00000049380		blue	0.570201	0.0332502	-0.825047	0.000280789
ENSSSCG00000042031		blue	-0.569936	0.0333506	0.394308	0.162981
ENSSSCG00000007790	PRR14	blue	0.569824	0.0333934	-0.695421	0.00575501
ENSSSCG00000038807	SCAF1	blue	0.568961	0.0337227	-0.717592	0.00385812
ENSSSCG00000019768	U12	blue	0.568899	0.0337464	-0.359283	0.207083
ENSSSCG00000016147	PIKFYVE	blue	-0.56856	0.0338766	0.844651	0.000143947
ENSSSCG00000033941	C2orf88	blue	0.568358	0.033954	-0.57608	0.0310771
ENSSSCG00000014010	MAPK9	blue	-0.568102	0.0340529	0.781731	0.000957544
ENSSSCG00000048591		blue	0.566961	0.0344951	-0.315438	0.271954
ENSSSCG00000045645		blue	-0.566627	0.0346254	0.809005	0.000458043
ENSSSCG00000014304	SEC24A	blue	-0.566087	0.0348366	0.718428	0.0037977
ENSSSCG00000014274	PDLIM4	blue	0.566065	0.0348453	-0.739248	0.00251767
ENSSSCG00000041921		blue	0.565689	0.034993	-0.256961	0.375162
ENSSSCG00000030305	SLC15A2	blue	0.565192	0.0351892	-0.741152	0.00242029
ENSSSCG00000042707		blue	0.565052	0.0352442	-0.377465	0.183344
ENSSSCG00000001080	CDKAL1	blue	-0.564906	0.0353022	0.765302	0.00142397
ENSSSCG00000028646	MMADHC	blue	-0.564811	0.0353398	0.934638	9.76814e-07
ENSSSCG00000014961	CWC15	blue	-0.564718	0.0353767	0.910086	6.27017e-06
ENSSSCG00000017197	FBF1	blue	0.564708	0.0353806	-0.867818	5.75722e-05
ENSSSCG00000003132		blue	0.564196	0.0355843	-0.809324	0.000453809
ENSSSCG00000044285		blue	0.563577	0.0358315	-0.374574	0.186995
ENSSSCG00000038534	TSR1	blue	-0.563339	0.0359271	0.780692	0.000982827
ENSSSCG00000017042	UBLCP1	blue	-0.563315	0.0359366	0.801223	0.000571668
ENSSSCG00000048094		blue	-0.56319	0.0359866	0.425149	0.129663
ENSSSCG00000006620	TUFT1	blue	-0.563098	0.0360237	0.778551	0.00103662
ENSSSCG00000003051	CD177	blue	0.562271	0.0363573	-0.754301	0.00182634
ENSSSCG00000040556		blue	-0.56226	0.036362	0.803857	0.000530923
ENSSSCG00000025700	U6	blue	-0.562095	0.0364286	0.423369	0.131449
ENSSSCG00000046845		blue	-0.562095	0.0364286	0.423369	0.131449
ENSSSCG00000048481		blue	-0.562095	0.0364286	0.423369	0.131449
ENSSSCG00000050801		blue	-0.562095	0.0364286	0.423369	0.131449
ENSSSCG00000045551		blue	-0.562095	0.0364286	0.423369	0.131449
ENSSSCG00000049015		blue	-0.562095	0.0364286	0.423369	0.131449
ENSSSCG00000046623		blue	-0.562095	0.0364286	0.423369	0.131449
ENSSSCG00000031130	ZBED1	blue	0.561873	0.036519	-0.78944	0.000785752
ENSSSCG00000003326	PEG3	blue	0.561831	0.0365359	-0.611522	0.0201363
ENSSSCG00000047235		blue	-0.561603	0.0366287	0.327486	0.25305
ENSSSCG00000008771	C4orf19	blue	-0.561584	0.0366365	0.603369	0.0223446
ENSSSCG00000011770	DNAJC19	blue	-0.561533	0.0366571	0.736037	0.0026888
ENSSSCG00000003083	CBLC	blue	0.560895	0.0369175	-0.715648	0.00400151
ENSSSCG00000030253	NOL9	blue	-0.560637	0.0370236	0.624209	0.0170329
ENSSSCG00000029511	UBASH3A	blue	0.560182	0.0372105	-0.351094	0.218378
ENSSSCG00000011949	CEP97	blue	-0.559632	0.0374373	0.816217	0.000369698
ENSSSCG00000031806		blue	-0.559494	0.0374946	0.360966	0.204808
ENSSSCG00000040513	AQP3	blue	0.559228	0.0376047	-0.808676	0.000462456
ENSSSCG00000016974	MAP1B	blue	0.559097	0.0376591	-0.814811	0.00038574
ENSSSCG00000049325		blue	-0.558103	0.038074	0.6879	0.00654141
ENSSSCG00000038646	ENAH	blue	-0.558013	0.0381119	0.915598	4.34236e-06
ENSSSCG00000032969		blue	0.557624	0.0382748	-0.644345	0.0128699
ENSSSCG00000019366	ssc-mir-181b-1	blue	-0.556941	0.0385632	0.368958	0.194222
ENSSSCG00000002844	PHKB	blue	0.556377	0.038802	-0.764518	0.00145007
ENSSSCG00000047521		blue	-0.5559	0.0390049	0.333249	0.244296
ENSSSCG00000015407	GNAI1	blue	-0.555617	0.0391257	0.616328	0.0189141
ENSSSCG00000027153	WARS2	blue	-0.555246	0.0392847	0.853239	0.000104354
ENSSSCG00000009229	ARHGAP24	blue	0.554464	0.039621	-0.622986	0.017315
ENSSSCG00000040773	TOB1	blue	-0.554206	0.0397322	0.877058	3.80573e-05
ENSSSCG00000011628	DNAJC13	blue	-0.553666	0.0399663	0.968671	1.27593e-08
ENSSSCG00000032408	CASP7	blue	0.553639	0.039978	-0.642511	0.013213
ENSSSCG00000014356	DNAJC18	blue	-0.553613	0.0399893	0.777471	0.00106461
ENSSSCG00000036781	PRELID3A	blue	-0.553454	0.0400581	0.650287	0.0118051
ENSSSCG00000024794	FBXO42	blue	-0.553414	0.0400758	0.870391	5.14653e-05
ENSSSCG00000018039		blue	0.553396	0.0400834	-0.805879	0.000501269
ENSSSCG00000031247	KAT8	blue	0.553295	0.0401276	-0.504926	0.0655421
ENSSSCG00000009821	ARPC3	blue	-0.552863	0.040316	0.764836	0.00143943
ENSSSCG00000038254	PRKRA	blue	0.552662	0.0404037	-0.351086	0.21839
ENSSSCG00000049577		blue	-0.552343	0.0405436	0.843735	0.000148805
ENSSSCG00000009732	CHFR	blue	0.552044	0.0406748	-0.951056	1.78516e-07
ENSSSCG00000016300	ATG16L1	blue	-0.55116	0.0410647	0.78985	0.00077737
ENSSSCG00000029783	MKX	blue	-0.550938	0.0411632	0.631158	0.015495
ENSSSCG00000009616	HR	blue	0.550493	0.0413612	-0.865386	6.38776e-05
ENSSSCG00000046180		blue	-0.550121	0.041527	0.465748	0.0932631
ENSSSCG00000002885	USF2	blue	0.550094	0.0415389	-0.868615	5.56211e-05
ENSSSCG00000024555	ING2	blue	-0.549916	0.0416187	0.623252	0.0172534
ENSSSCG00000002520	SLC25A29	blue	0.549768	0.0416845	-0.857337	8.887e-05
ENSSSCG00000008913	IGFBP7	blue	0.549095	0.0419867	-0.765561	0.00141544
ENSSSCG00000008692	ADD1	blue	0.548875	0.0420858	-0.822401	0.00030539
ENSSSCG00000017561	ABCC3	blue	0.547933	0.0425122	-0.619406	0.0181616
ENSSSCG00000015211	PKNOX2	blue	0.547592	0.0426674	-0.69691	0.00560849
ENSSSCG00000048659		blue	0.546953	0.0429592	-0.406624	0.149068
ENSSSCG00000011841	SENP5	blue	-0.546244	0.0432847	0.751809	0.00192889
ENSSSCG00000005719	RAPGEF1	blue	0.545719	0.0435265	-0.878745	3.51622e-05
ENSSSCG00000049363		blue	-0.545653	0.0435574	0.48942	0.0756939
ENSSSCG00000038048		blue	-0.545653	0.0435574	0.48942	0.0756939
ENSSSCG00000029850	SNORD111B	blue	-0.545653	0.0435574	0.48942	0.0756939
ENSSSCG00000051166		blue	-0.545653	0.0435574	0.48942	0.0756939
ENSSSCG00000044188		blue	-0.545653	0.0435574	0.48942	0.0756939
ENSSSCG00000030606		blue	-0.545653	0.0435574	0.48942	0.0756939
ENSSSCG00000041444		blue	-0.545653	0.0435574	0.48942	0.0756939
ENSSSCG00000044136		blue	-0.544572	0.0440589	0.934476	9.91108e-07
ENSSSCG00000007650	STAG3	blue	0.544566	0.0440617	-0.72061	0.0036436
ENSSSCG00000003030	CIC	blue	0.544444	0.0441186	-0.779024	0.00102454
ENSSSCG00000003382	TAS1R1	blue	-0.544019	0.0443175	0.520605	0.0563063
ENSSSCG00000002557	NUDT14	blue	0.543714	0.0444603	-0.762091	0.00153327
ENSSSCG00000042168		blue	0.541988	0.0452758	-0.683964	0.00698492
ENSSSCG00000024377	RPS6KA5	blue	0.541768	0.0453808	-0.420747	0.13411
ENSSSCG00000003146	NTN5	blue	-0.541614	0.0454543	0.863044	7.04667e-05
ENSSSCG00000021769	ZNF341	blue	0.541489	0.0455137	-0.512148	0.0611628
ENSSSCG00000032074	IRX2	blue	0.541393	0.0455598	-0.939727	6.07387e-07
ENSSSCG00000002620	EFHC1	blue	0.541006	0.0457447	-0.59449	0.0249519
ENSSSCG00000038757		blue	0.540937	0.0457781	-0.814312	0.000391567
ENSSSCG00000032320	TCIM	blue	0.540437	0.0460179	-0.79853	0.000615866
ENSSSCG00000040657	STRN3	blue	-0.540392	0.0460398	0.684041	0.006976
ENSSSCG00000029094	PIK3R4	blue	-0.540342	0.0460638	0.692436	0.00605777
ENSSSCG00000044497		blue	0.539525	0.0464584	-0.766844	0.00137373
ENSSSCG00000012999	CAPN1	blue	0.539438	0.046501	-0.69408	0.00588957
ENSSSCG00000041127		blue	-0.539277	0.046579	0.407091	0.148557
ENSSSCG00000046907		blue	0.538941	0.0467423	-0.559243	0.0375985
ENSSSCG00000009988	THOC5	blue	-0.537757	0.0473213	0.764396	0.00145416
ENSSSCG00000008080	PHF2	blue	0.536711	0.0478372	-0.891185	1.8886e-05
ENSSSCG00000010551	BLOC1S2	blue	-0.536684	0.0478507	0.83473	0.000204018
ENSSSCG00000001735	RHAG	blue	0.536663	0.0478607	-0.705166	0.00484802
ENSSSCG00000000645	GABARAPL1	blue	-0.535522	0.0484285	0.629462	0.0158602
ENSSSCG00000033451		blue	-0.534432	0.0489755	0.374623	0.186933
ENSSSCG00000001089	GPLD1	blue	-0.534421	0.0489808	0.301094	0.295523
ENSSSCG00000000075	MRTFA	blue	0.534415	0.048984	-0.910832	5.97439e-06
ENSSSCG00000008213	CD8B	blue	-0.533844	0.0492722	0.930743	1.37067e-06
ENSSSCG00000002950		blue	0.533673	0.0493587	-0.894644	1.56793e-05
ENSSSCG00000024373	TRIP12	blue	-0.533545	0.0494237	0.858286	8.5566e-05
ENSSSCG00000028875	HAVCR2	blue	-0.533323	0.0495364	0.272044	0.346752
ENSSSCG00000046967		blue	-0.533294	0.0495511	0.714897	0.00405799
ENSSSCG00000032423	SPOCK1	blue	0.533285	0.0495557	-0.774495	0.00114492
ENSSSCG00000035555	BTBD6	blue	0.532946	0.0497277	-0.69137	0.00616887
ENSSSCG00000050621		blue	-0.532862	0.0497706	0.43951	0.115846
ENSSSCG00000005981	FBXO32	blue	-0.532741	0.0498326	0.778221	0.0010451
ENSSSCG00000009788	DENR	blue	-0.532675	0.0498661	0.900202	1.14677e-05
ENSSSCG00000037263	SIAH1	blue	-0.531845	0.050291	0.49456	0.0722133
ENSSSCG00000004193	ENPP1	blue	0.531583	0.0504257	-0.785549	0.00086908
ENSSSCG00000044368		blue	0.531535	0.0504504	-0.704682	0.00489031
ENSSSCG00000047753		blue	-0.531301	0.050571	0.830619	0.000234207
ENSSSCG00000029855	LHFPL6	blue	0.531204	0.0506209	-0.823933	0.000290946
ENSSSCG00000037859		blue	0.531177	0.0506347	-0.566501	0.0346743
ENSSSCG00000032404	KLHL11	blue	-0.531012	0.0507199	0.535117	0.0486312
ENSSSCG00000040100		blue	0.530882	0.0507872	-0.802578	0.000550405
ENSSSCG00000029781	SELENOM	blue	0.530814	0.0508221	-0.8097	0.00044886
ENSSSCG00000010849	WDR26	blue	-0.530616	0.0509247	0.905188	8.52631e-06
ENSSSCG00000024692	RRBP1	blue	0.530593	0.0509367	-0.644628	0.0128176
ENSSSCG00000031821		blue	-0.530507	0.0509816	0.633682	0.0149635
ENSSSCG00000039472	SLC30A1	blue	-0.530397	0.0510383	0.926361	1.96155e-06
ENSSSCG00000037697	MGP	blue	-0.530373	0.0510511	0.745352	0.00221604
ENSSSCG00000003801	IL23R	blue	-0.530367	0.0510542	0.97224	6.22347e-09
ENSSSCG00000034414	PSME3IP1	blue	0.530092	0.0511968	-0.860958	7.67932e-05
ENSSSCG00000033830	CCDC8	blue	0.529787	0.0513559	-0.486859	0.0774718
ENSSSCG00000016035	COL5A2	blue	0.52973	0.0513856	-0.56237	0.0363173
ENSSSCG00000014071		blue	-0.52901	0.0517619	0.801992	0.000559524
ENSSSCG00000031459	KMT5B	blue	-0.528692	0.0519291	0.967716	1.5248e-08
ENSSSCG00000041906		blue	0.528629	0.0519623	-0.741771	0.00238927
ENSSSCG00000038146	SNORD49B	blue	-0.528587	0.0519842	0.611169	0.0202281
ENSSSCG00000008508	FAM98A	blue	-0.528434	0.0520649	0.615122	0.0192154
ENSSSCG00000005128	TUSC1	blue	0.527959	0.0523151	-0.621847	0.0175811
ENSSSCG00000012918	GRK2	blue	0.527798	0.0524001	-0.832236	0.000221928
ENSSSCG00000016957	CD180	blue	-0.527723	0.0524401	0.41759	0.137362
ENSSSCG00000017990	PIK3R6	blue	0.527588	0.0525115	-0.814366	0.000390942
ENSSSCG00000001570	PI16	blue	0.527403	0.0526095	-0.75779	0.00169004
ENSSSCG00000026596	SYNRG	blue	-0.526708	0.052979	0.889849	2.02602e-05
ENSSSCG00000007345	RALGAPB	blue	-0.52609	0.0533095	0.955197	1.05996e-07
ENSSSCG00000036783	CCDC127	blue	0.525862	0.0534318	-0.621641	0.0176296
ENSSSCG00000028902	RB1CC1	blue	-0.525822	0.0534532	0.97802	1.55264e-09
ENSSSCG00000033036	ZC3H7B	blue	0.525628	0.0535574	-0.68641	0.00670663
ENSSSCG00000043938		blue	-0.525525	0.0536129	0.341277	0.232415
ENSSSCG00000017694	ACACA	blue	-0.525144	0.0538178	0.880221	3.27799e-05
ENSSSCG00000026707	XCR1	blue	-0.525016	0.0538873	0.872734	4.63752e-05
ENSSSCG00000004893	VPS4B	blue	-0.524806	0.0540007	0.730079	0.00303072
ENSSSCG00000003645	UTP11	blue	-0.524765	0.0540226	0.989999	1.41353e-11
ENSSSCG00000022906		blue	0.524484	0.0541747	-0.553924	0.0398541
ENSSSCG00000024679	UPF3A	blue	-0.52442	0.0542093	0.733821	0.00281224
ENSSSCG00000034345	SPRY3	blue	-0.523968	0.0544551	0.483285	0.0800017
ENSSSCG00000034036		blue	0.523482	0.0547195	-0.730304	0.00301719
ENSSSCG00000037197	BAG5	blue	0.523321	0.0548079	-0.748398	0.00207664
ENSSSCG00000013241	NR1H3	blue	0.522079	0.0554895	-0.634429	0.0148091
ENSSSCG00000015393	DMTF1	blue	-0.521309	0.0559151	0.657421	0.0106175
ENSSSCG00000007125		blue	-0.520847	0.0561716	0.64369	0.0129916
ENSSSCG00000046446		blue	0.519932	0.0566826	-0.611843	0.0200529
ENSSSCG00000047283		blue	-0.519865	0.0567201	0.955686	9.93478e-08
ENSSSCG00000004370	ATG5	blue	-0.519584	0.0568773	0.933073	1.12193e-06
ENSSSCG00000024146	ssc-mir-1249-1	blue	-0.519572	0.0568843	0.633002	0.0151053
ENSSSCG00000044282		blue	-0.519368	0.0569987	0.794274	0.000691291
ENSSSCG00000015559	NCF2	blue	-0.519357	0.0570052	0.542804	0.0448892
ENSSSCG00000005204	RANBP6	blue	-0.519024	0.0571923	0.965423	2.29004e-08
ENSSSCG00000046579		blue	0.519001	0.0572053	-0.725563	0.00331193
ENSSSCG00000049432		blue	0.517931	0.057811	-0.394283	0.16301
ENSSSCG00000009628	CCAR2	blue	0.517707	0.057938	-0.614024	0.0194929
ENSSSCG00000028475	KPNA1	blue	-0.517563	0.05802	0.966948	1.75272e-08
ENSSSCG00000010534	HPS1	blue	0.517329	0.0581534	-0.918936	3.43409e-06
ENSSSCG00000000540	OVCH1	blue	0.516878	0.0584111	-0.427406	0.127421
ENSSSCG00000013366	LDHA	blue	-0.516786	0.0584641	0.727815	0.00316922
ENSSSCG00000041783		blue	-0.516694	0.0585164	0.883006	2.86439e-05
ENSSSCG00000050121		blue	-0.516448	0.0586577	0.430132	0.124749
ENSSSCG00000042110		blue	-0.516038	0.0588932	0.809632	0.000449751
ENSSSCG00000033737		blue	0.515413	0.0592535	-0.792076	0.000733039
ENSSSCG00000047440		blue	0.515177	0.0593905	-0.529647	0.051429
ENSSSCG00000045420		blue	0.514674	0.0596819	-0.643769	0.0129769
ENSSSCG00000016156	ACADL	blue	0.514599	0.0597259	-0.504705	0.0656797
ENSSSCG00000013248	LRP4	blue	0.514452	0.0598109	-0.642614	0.0131936
ENSSSCG00000008010	CHTF18	blue	0.514136	0.0599955	-0.441368	0.114135
ENSSSCG00000035080		blue	-0.514065	0.0600367	0.880916	3.17045e-05
ENSSSCG00000037823	ANKRD34A	blue	0.513965	0.0600953	-0.457431	0.100058
ENSSSCG00000013282	ACCS	blue	0.513767	0.0602106	-0.700721	0.00524676
ENSSSCG00000023619	SLC12A9	blue	0.513567	0.0603278	-0.890342	1.97437e-05
ENSSSCG00000014012	GFPT2	blue	-0.513418	0.0604153	0.365378	0.19892
ENSSSCG00000011978	CPOX	blue	-0.51335	0.0604547	0.511318	0.0616554
ENSSSCG00000008040	TSC2	blue	0.512918	0.0607088	-0.726314	0.00326382
ENSSSCG00000005938	COL22A1	blue	0.512864	0.0607404	-0.26577	0.358421
ENSSSCG00000021238	STX1B	blue	0.512855	0.0607459	-0.858595	8.45096e-05
ENSSSCG00000006546	TDRD10	blue	-0.512312	0.0610661	0.441668	0.11386
ENSSSCG00000016956	MAST4	blue	-0.512202	0.0611309	0.961087	4.60825e-08
ENSSSCG00000005710	LAMC3	blue	0.511922	0.0612966	-0.852896	0.000105744
ENSSSCG00000012425	UPRT	blue	-0.510555	0.0621101	0.848185	0.000126396
ENSSSCG00000004589	RNF111	blue	-0.510398	0.0622045	0.824008	0.000290252
ENSSSCG00000028284	KCND1	blue	-0.510077	0.0623969	0.802452	0.000552351
ENSSSCG00000007286	ACSS2	blue	0.509728	0.0626065	-0.825897	0.000273238
ENSSSCG00000006194	NCOA2	blue	-0.509687	0.0626308	0.908753	6.82855e-06
ENSSSCG00000027421		blue	-0.508024	0.0636369	0.52304	0.0549613
ENSSSCG00000008297	TPRKB	blue	-0.508014	0.0636429	0.705773	0.00479549
ENSSSCG00000009023	DCLK2	blue	0.507848	0.063744	-0.698773	0.00542931
ENSSSCG00000016948	TRIM23	blue	-0.507611	0.0638887	0.836723	0.000190563
ENSSSCG00000036560	PAWR	blue	-0.507565	0.0639169	0.845715	0.000138465
ENSSSCG00000027443	MRAS	blue	-0.507456	0.0639832	0.541089	0.0457052
ENSSSCG00000010741	EDRF1	blue	-0.50727	0.0640971	0.956511	8.89049e-08
ENSSSCG00000022364	CPT1B	blue	0.506674	0.0644623	-0.794574	0.000685747
ENSSSCG00000024983	RSL24D1	blue	-0.50659	0.064514	0.855173	9.67943e-05
ENSSSCG00000034510	ORAI1	blue	0.506554	0.0645361	-0.790743	0.000759341
ENSSSCG00000002782	PLEKHG4	blue	-0.505503	0.0651844	0.827208	0.000261911
ENSSSCG00000042042		blue	-0.505373	0.0652652	0.792521	0.000724425
ENSSSCG00000016506	KLRG2	blue	-0.505098	0.0654353	0.491424	0.0743232
ENSSSCG00000033210		blue	0.505003	0.0654941	-0.531166	0.0506405
ENSSSCG00000017131	FN3K	blue	0.504889	0.0655654	-0.634406	0.0148137
ENSSSCG00000012835		blue	-0.504715	0.0656734	0.769343	0.00129534
ENSSSCG00000013583	CAMSAP3	blue	0.504566	0.065766	-0.824893	0.000282171
ENSSSCG00000042268		blue	-0.504353	0.0658992	0.707391	0.00465763
ENSSSCG00000006319	POGK	blue	0.504214	0.0659856	-0.661279	0.0100147
ENSSSCG00000034609	RNF112	blue	0.503742	0.0662809	-0.535691	0.048344
ENSSSCG00000047813		blue	-0.503407	0.0664909	0.671034	0.00860814
ENSSSCG00000009794	MLXIP	blue	0.503406	0.0664921	-0.837789	0.000183663
ENSSSCG00000045484		blue	0.503381	0.0665073	-0.884217	2.69828e-05
ENSSSCG00000005702	FUBP3	blue	-0.503187	0.0666297	0.705832	0.0047904
ENSSSCG00000041115		blue	0.503092	0.066689	-0.282913	0.327042
ENSSSCG00000007305	SPAG4	blue	0.503044	0.0667196	-0.586428	0.0275109
ENSSSCG00000003653	NDUFS5	blue	-0.502596	0.0670017	0.857195	8.93718e-05
ENSSSCG00000047560		blue	-0.502574	0.0670158	0.502939	0.0667852
ENSSSCG00000024618	FBXO28	blue	-0.502375	0.0671412	0.793888	0.000698483
ENSSSCG00000022305	DNAI4	blue	-0.502208	0.0672471	0.509714	0.0626148
ENSSSCG00000009230	WDFY3	blue	0.502038	0.067355	-0.561231	0.0367801
ENSSSCG00000006752	CSDE1	blue	-0.50167	0.0675881	0.839762	0.000171432
ENSSSCG00000001544	TEAD3	blue	0.499896	0.0687219	-0.833952	0.00020947
ENSSSCG00000041527		blue	0.499827	0.0687663	-0.67308	0.00833349
ENSSSCG00000006065	ANKRD46	blue	-0.49981	0.0687775	0.961756	4.15946e-08
ENSSSCG00000041453		blue	-0.49963	0.0688932	0.390169	0.167842
ENSSSCG00000011040	CACNB2	blue	-0.499566	0.0689344	0.540579	0.0459499
ENSSSCG00000002508	SETD3	blue	0.499511	0.0689695	-0.940214	5.79146e-07
ENSSSCG00000020657	BCAM	blue	0.499283	0.0691167	-0.467222	0.0920932
ENSSSCG00000014331		blue	-0.49904	0.069274	0.881205	3.12665e-05
ENSSSCG00000000077	ADSL	blue	-0.498995	0.0693025	0.909769	6.39916e-06
ENSSSCG00000026990	FAM162A	blue	-0.49894	0.069338	0.96387	2.97057e-08
ENSSSCG00000001928		blue	-0.498799	0.0694299	0.585328	0.0278748
ENSSSCG00000021640	ZNF879	blue	-0.498659	0.0695202	0.677507	0.00776265
ENSSSCG00000033586	DBNDD2	blue	0.498618	0.0695466	-0.822701	0.000302513
ENSSSCG00000008974	SDAD1	blue	-0.498559	0.0695853	0.918996	3.41929e-06
ENSSSCG00000007682	SH2B2	blue	0.498205	0.0698147	-0.614314	0.0194192
ENSSSCG00000048509		blue	-0.498009	0.0699423	0.323098	0.259841
ENSSSCG00000006267	PCMTD1	blue	-0.49778	0.070092	0.881948	3.01617e-05
ENSSSCG00000017900	KIF1C	blue	0.497525	0.0702578	-0.945417	3.39235e-07
ENSSSCG00000012403	OGT	blue	-0.496214	0.0711177	0.891173	1.88984e-05
ENSSSCG00000040586		blue	0.496028	0.0712407	-0.786759	0.00084244
ENSSSCG00000040816	NOL7	blue	-0.495795	0.0713944	0.973752	4.46145e-09
ENSSSCG00000022895	CRYBG3	blue	-0.495704	0.0714542	0.918008	3.66925e-06
ENSSSCG00000023658	NR2C2AP	blue	-0.495671	0.0714761	0.667973	0.00903183
ENSSSCG00000046113		blue	0.495063	0.0718793	-0.88419	2.70199e-05
ENSSSCG00000051187		blue	0.494966	0.0719434	-0.564359	0.0355194
ENSSSCG00000008176	LONRF2	blue	0.494912	0.0719792	-0.605933	0.0216313
ENSSSCG00000016008	CWC22	blue	-0.494897	0.0719895	0.706782	0.00470914
ENSSSCG00000010580	NFKB2	blue	0.494662	0.0721457	-0.916247	4.15197e-06
ENSSSCG00000040973		blue	0.494652	0.072152	-0.698619	0.00544398
ENSSSCG00000033720		blue	0.494651	0.0721527	-0.85109	0.000113309
ENSSSCG00000011925	CD200R1	blue	-0.493862	0.0726796	0.248252	0.392115
ENSSSCG00000022034	SMYD3	blue	-0.493329	0.0730366	0.855753	9.46136e-05
ENSSSCG00000045945		blue	0.493148	0.0731579	-0.413179	0.141995
ENSSSCG00000007602	BAIAP2L1	blue	-0.492629	0.0735072	0.95777	7.47425e-08
ENSSSCG00000037451	PPFIA1	blue	0.492215	0.0737871	-0.905717	8.25439e-06
ENSSSCG00000015987	NFE2L2	blue	0.491747	0.0741041	-0.762248	0.0015278
ENSSSCG00000017983	PER1	blue	0.491301	0.074407	-0.715747	0.00399408
ENSSSCG00000020754	POLR1G	blue	-0.491237	0.0744504	0.866565	6.07535e-05
ENSSSCG00000004781	PAK6	blue	-0.490747	0.0747844	0.466771	0.0924504
ENSSSCG00000006176	ELOC	blue	-0.49069	0.0748228	0.710054	0.00443746
ENSSSCG00000025540	SNORD33	blue	-0.490474	0.0749705	0.388687	0.169604
ENSSSCG00000024818	RCAN3	blue	-0.490006	0.0752912	0.856327	9.24981e-05
ENSSSCG00000025775	TADA2A	blue	-0.489516	0.075628	0.989707	1.67944e-11
ENSSSCG00000034265	DESI1	blue	-0.489498	0.0756402	0.91162	5.67416e-06
ENSSSCG00000022656	SRFBP1	blue	-0.489138	0.0758881	0.584729	0.0280744
ENSSSCG00000025906	ALKBH1	blue	-0.488677	0.0762069	0.763907	0.00147069
ENSSSCG00000020666	EHD4	blue	-0.488591	0.0762666	0.965293	2.3414e-08
ENSSSCG00000044061		blue	0.488458	0.0763585	-0.69349	0.0059495
ENSSSCG00000002682	MBTPS1	blue	0.488214	0.0765272	-0.738358	0.0025642
ENSSSCG00000026142	TNK1	blue	0.487944	0.0767153	-0.70481	0.00487904
ENSSSCG00000046355		blue	0.487655	0.0769161	-0.699738	0.00533829
ENSSSCG00000011375	USP19	blue	0.487534	0.0770001	-0.786716	0.000843363
ENSSSCG00000037766	NR3C2	blue	0.487278	0.0771787	-0.805236	0.000510555
ENSSSCG00000045251	U3	blue	-0.486926	0.0774249	0.349288	0.220919
ENSSSCG00000045263		blue	0.486588	0.0776614	-0.684958	0.00687071
ENSSSCG00000011630	ACKR4	blue	-0.486427	0.0777749	0.758194	0.00167479
ENSSSCG00000050343		blue	-0.486141	0.0779755	0.860587	7.79659e-05
ENSSSCG00000035419	RARRES2	blue	0.4858	0.0782153	-0.600939	0.0230366
ENSSSCG00000010915	NAV1	blue	-0.485273	0.0785876	0.85607	9.34417e-05
ENSSSCG00000005715	PRRC2B	blue	0.484603	0.0790618	-0.917045	3.92702e-06
ENSSSCG00000032544	MTA1	blue	0.484272	0.0792977	-0.74985	0.00201272
ENSSSCG00000002531	MOK	blue	0.483852	0.0795963	-0.926666	1.9146e-06
ENSSSCG00000038650	TLCD1	blue	-0.483756	0.0796651	0.889155	2.10048e-05
ENSSSCG00000003429	CLCN6	blue	0.483548	0.0798139	-0.820119	0.000327976
ENSSSCG00000042446		blue	-0.483262	0.0800179	0.62403	0.017074
ENSSSCG00000044447		blue	-0.482887	0.0802868	0.700089	0.00530538
ENSSSCG00000032585	ZNF613	blue	0.482649	0.0804581	-0.765334	0.00142293
ENSSSCG00000011941	IFT57	blue	0.482622	0.0804772	-0.605633	0.0217138
ENSSSCG00000006423	OR6N2	blue	0.482587	0.0805023	-0.396669	0.160251
ENSSSCG00000008099	ZC3H8	blue	-0.482552	0.0805275	0.724217	0.00339959
ENSSSCG00000045659		blue	-0.482188	0.0807898	0.844219	0.000146222
ENSSSCG00000031710	BRF1	blue	0.482149	0.0808178	-0.708859	0.00453524
ENSSSCG00000008168	RNF149	blue	0.482016	0.0809137	-0.922266	2.6896e-06
ENSSSCG00000030461	HEPHL1	blue	-0.481991	0.0809318	0.843765	0.000148644
ENSSSCG00000022952	NMD3	blue	-0.481854	0.081031	0.734497	0.00277411
ENSSSCG00000007700	HIP1	blue	0.481589	0.0812225	-0.788083	0.000814052
ENSSSCG00000008464	MTA3	blue	-0.481384	0.0813713	0.929432	1.52951e-06
ENSSSCG00000024752	ALDH4A1	blue	0.481282	0.0814447	-0.952002	1.59129e-07
ENSSSCG00000011064	ACBD5	blue	-0.481199	0.0815054	0.828132	0.000254153
ENSSSCG00000028331	IL1R2	blue	0.481063	0.0816041	-0.818769	0.000341958
ENSSSCG00000009682	HMBOX1	blue	-0.481041	0.0816198	0.903978	9.17541e-06
ENSSSCG00000005845	TOR4A	blue	0.480995	0.0816533	-0.693649	0.00593327
ENSSSCG00000025187	TMEM126A	blue	-0.480767	0.0818185	0.869963	5.24433e-05
ENSSSCG00000001960	EAPP	blue	-0.480503	0.0820108	0.85161	0.000111087
ENSSSCG00000045223		blue	-0.480476	0.0820305	0.767484	0.00135332
ENSSSCG00000034203	C9orf64	blue	-0.480366	0.082111	0.795686	0.000665485
ENSSSCG00000032626		blue	-0.480224	0.0822144	0.756275	0.00174821
ENSSSCG00000020740	DSG4	blue	-0.479937	0.0824245	0.817124	0.000359642
ENSSSCG00000004403	CDC40	blue	-0.479898	0.082453	0.61382	0.0195447
ENSSSCG00000023850		blue	-0.479246	0.0829308	0.741597	0.00239799
ENSSSCG00000042741		blue	0.478939	0.0831558	-0.470202	0.0897598
ENSSSCG00000008180	EIF5B	blue	-0.478917	0.0831724	0.939434	6.24911e-07
ENSSSCG00000001382	DDR1	blue	0.478348	0.0835918	-0.920013	3.17678e-06
ENSSSCG00000044119		blue	-0.478268	0.0836504	0.381117	0.178796
ENSSSCG00000051787		blue	0.478107	0.0837701	-0.640929	0.0135145
ENSSSCG00000015861	WDR33	blue	-0.478071	0.0837967	0.793737	0.000701302
ENSSSCG00000013576	STXBP2	blue	0.478063	0.083802	-0.593556	0.0252388
ENSSSCG00000045734		blue	0.478051	0.083811	-0.791277	0.000748711
ENSSSCG00000011358	TREX1	blue	0.477658	0.0841023	-0.95395	1.24622e-07
ENSSSCG00000024972	CCDC25	blue	-0.477532	0.0841956	0.463833	0.0947986
ENSSSCG00000040104		blue	-0.477388	0.0843023	0.401828	0.154389
ENSSSCG00000023595	AK3	blue	0.477388	0.0843029	-0.789993	0.000774457
ENSSSCG00000017438	KRT35	blue	-0.476927	0.0846453	0.707374	0.00465906
ENSSSCG00000024071	SCARF1	blue	0.476549	0.0849271	-0.822515	0.000304294
ENSSSCG00000000858	PMCH	blue	-0.474793	0.0862455	0.720657	0.00364031
ENSSSCG00000011293	POMGNT2	blue	0.474454	0.0865018	-0.703807	0.00496733
ENSSSCG00000017752	WSB1	blue	-0.474159	0.0867253	0.549261	0.0419123
ENSSSCG00000022676	OPHN1	blue	0.474041	0.0868144	-0.904432	8.92735e-06
ENSSSCG00000013065	ASRGL1	blue	0.473733	0.0870481	-0.88666	2.38729e-05
ENSSSCG00000032456		blue	0.473143	0.0874975	-0.60164	0.0228354
ENSSSCG00000010357	WAPL	blue	-0.472869	0.0877065	0.756815	0.00172728
ENSSSCG00000036885	ZNF654	blue	-0.472422	0.0880485	0.923708	2.41147e-06
ENSSSCG00000046942		blue	-0.472194	0.0882228	0.717773	0.003845
ENSSSCG00000012127	GEMIN8	blue	-0.472055	0.0883299	0.839666	0.000172015
ENSSSCG00000037639	TIMMDC1	blue	-0.472013	0.0883616	0.82124	0.000316712
ENSSSCG00000011704	WWTR1	blue	0.471843	0.0884924	-0.949564	2.13074e-07
ENSSSCG00000015732	TFCP2L1	blue	0.471798	0.0885271	-0.939879	5.98429e-07
ENSSSCG00000050224		blue	-0.47174	0.0885713	0.675059	0.00807443
ENSSSCG00000014670	TRIM22	blue	0.471706	0.0885978	-0.588974	0.0266824
ENSSSCG00000034230		blue	-0.471395	0.0888373	0.857723	8.75122e-05
ENSSSCG00000006785	RAP1A	blue	-0.471255	0.0889453	0.837261	0.000187057
ENSSSCG00000007077	ESF1	blue	-0.470953	0.0891784	0.805722	0.000503528
ENSSSCG00000024445	METTL3	blue	-0.47092	0.0892036	0.865855	6.26193e-05
ENSSSCG00000033299	FLNA	blue	0.470654	0.0894092	-0.964376	2.73263e-08
ENSSSCG00000007554	ZFAND2A	blue	-0.470301	0.0896826	0.704663	0.00489191
ENSSSCG00000030486	TBC1D23	blue	-0.470207	0.0897554	0.972346	6.0839e-09
ENSSSCG00000009426	CCDC122	blue	0.47016	0.0897921	-0.800462	0.000583889
ENSSSCG00000013110	TMEM109	blue	0.469791	0.0900791	-0.920178	3.13869e-06
ENSSSCG00000000093	DNAL4	blue	0.469689	0.0901583	-0.558579	0.0378748
ENSSSCG00000045769		blue	-0.469453	0.0903424	0.895937	1.46014e-05
ENSSSCG00000000262	SPRYD3	blue	0.469417	0.0903706	-0.83738	0.000186285
ENSSSCG00000035554	LHFPL3	blue	-0.469326	0.0904409	0.60027	0.02323
ENSSSCG00000001661	SRF	blue	0.469211	0.090531	-0.850781	0.000114644
ENSSSCG00000011592	PLXND1	blue	0.469201	0.0905393	-0.870108	5.21097e-05
ENSSSCG00000043717		blue	-0.469061	0.090648	0.332854	0.244891
ENSSSCG00000009766	ATP6V0A2	blue	-0.469026	0.0906752	0.877926	3.65441e-05
ENSSSCG00000048140		blue	-0.468537	0.0910588	0.844232	0.000146153
ENSSSCG00000032549	GNA12	blue	0.46829	0.0912521	-0.950129	1.99382e-07
ENSSSCG00000049544		blue	0.468033	0.0914545	-0.675969	0.00795747
ENSSSCG00000035478	RMND5A	blue	-0.467499	0.0918748	0.973818	4.39518e-09
ENSSSCG00000004144	HECA	blue	-0.466971	0.0922918	0.932284	1.20161e-06
ENSSSCG00000045222		blue	0.466887	0.0923581	-0.533484	0.0494543
ENSSSCG00000002633	GAS8	blue	0.466842	0.0923943	-0.725228	0.00333358
ENSSSCG00000004947	LCTL	blue	-0.466691	0.0925135	0.777201	0.00107172
ENSSSCG00000014411	LARS1	blue	-0.466367	0.0927709	0.938898	6.58035e-07
ENSSSCG00000006885	ALG14	blue	-0.466272	0.0928459	0.872776	4.62871e-05
ENSSSCG00000021038	NRIP1	blue	-0.466183	0.0929168	0.97915	1.13398e-09
ENSSSCG00000007161	LZTS3	blue	0.466139	0.0929518	-0.911383	5.76312e-06
ENSSSCG00000012485	NOX1	blue	-0.466005	0.0930588	0.859912	8.01351e-05
ENSSSCG00000050116		blue	0.465921	0.0931254	-0.582536	0.0288142
ENSSSCG00000019093	SNORD16	blue	-0.465901	0.0931411	0.25561	0.377766
ENSSSCG00000007735		blue	-0.465785	0.0932333	0.946516	3.00984e-07
ENSSSCG00000006783	DDX20	blue	-0.465713	0.0932911	0.600207	0.0232482
ENSSSCG00000009944	CORO1C	blue	0.465095	0.0937843	-0.965796	2.14736e-08
ENSSSCG00000009921	OASL	blue	-0.46499	0.0938688	0.91324	5.09634e-06
ENSSSCG00000022643	KATNAL2	blue	-0.464878	0.0939581	0.430663	0.124232
ENSSSCG00000042146		blue	-0.464662	0.0941314	0.931191	1.31963e-06
ENSSSCG00000016248	AGFG1	blue	-0.464599	0.0941818	0.969631	1.06073e-08
ENSSSCG00000009061	NAA15	blue	-0.464313	0.0944118	0.875338	4.12066e-05
ENSSSCG00000008031	GNPTG	blue	0.464301	0.0944213	-0.710361	0.00441254
ENSSSCG00000036592	SRSF2	blue	-0.464091	0.0945906	0.772777	0.00119343
ENSSSCG00000036326	LATS2	blue	0.463982	0.0946784	-0.918104	3.64426e-06
ENSSSCG00000006635	SEMA6C	blue	0.463948	0.0947057	-0.763903	0.00147082
ENSSSCG00000017220	OTOP3	blue	0.463486	0.0950785	-0.571328	0.032825
ENSSSCG00000006285	METTL18	blue	-0.462931	0.0955277	0.784406	0.000894839
ENSSSCG00000018045	ULK2	blue	0.462482	0.0958915	-0.951463	1.69943e-07
ENSSSCG00000039340	CCDC184	blue	0.462297	0.0960426	-0.802429	0.000552714
ENSSSCG00000011703	TM4SF4	blue	0.461528	0.0966697	-0.814659	0.000387507
ENSSSCG00000044308		blue	-0.46081	0.0972572	0.405876	0.14989
ENSSSCG00000013387		blue	-0.460554	0.0974674	0.576837	0.030805
ENSSSCG00000008750	PACRGL	blue	-0.460553	0.0974683	0.751382	0.00194695
ENSSSCG00000040672		blue	0.460534	0.0974838	-0.447688	0.108444
ENSSSCG00000046008		blue	-0.46036	0.0976275	0.347146	0.223958
ENSSSCG00000033027	CIAO2B	blue	-0.46024	0.0977258	0.841254	0.000162627
ENSSSCG00000014901	PCF11	blue	-0.460181	0.0977747	0.804999	0.000514015
ENSSSCG00000011794	SENP2	blue	-0.460091	0.0978485	0.972325	6.11069e-09
ENSSSCG00000024810	PRAM1	blue	0.460066	0.0978694	-0.689654	0.00635089
ENSSSCG00000048060		blue	-0.459938	0.0979751	0.770228	0.00126844
ENSSSCG00000023743	CLDN6	blue	0.459774	0.0981103	-0.52156	0.055776
ENSSSCG00000047720		blue	0.459587	0.0982645	-0.813567	0.000400407
ENSSSCG00000034847	MS4A15	blue	0.459244	0.0985484	-0.636935	0.0142992
ENSSSCG00000016402	AGXT	blue	0.459007	0.098745	-0.874537	4.2743e-05
ENSSSCG00000027434	OLFM2	blue	0.458696	0.0990026	-0.666381	0.00925855
ENSSSCG00000000039	POLDIP3	blue	0.458665	0.0990284	-0.809136	0.000456304
ENSSSCG00000011916	ATP6V1A	blue	0.458642	0.099048	-0.486944	0.0774122
ENSSSCG00000012026	ADAMTS1	blue	0.458257	0.0993684	-0.899487	1.19507e-05
ENSSSCG00000047280		blue	0.457793	0.0997551	-0.558222	0.038024
ENSSSCG00000007830	RBBP6	blue	-0.457477	0.10002	0.87762	3.7072e-05
ENSSSCG00000001805	WHAMM	blue	0.457402	0.100082	-0.57021	0.0332468
ENSSSCG00000040012	TMEM147	blue	0.457308	0.100161	-0.717992	0.00382916
ENSSSCG00000025478	MIB1	blue	-0.456781	0.100603	0.783518	0.00091527
ENSSSCG00000050815		blue	-0.456582	0.100771	0.727898	0.00316406
ENSSSCG00000025244		blue	-0.456507	0.100833	0.439649	0.115717
ENSSSCG00000021145	AP1S1	blue	0.455988	0.101271	-0.879897	3.32919e-05
ENSSSCG00000003803		blue	-0.45578	0.101446	0.956146	9.34129e-08
ENSSSCG00000037779	CAPN10	blue	0.45546	0.101717	-0.692064	0.00609639
ENSSSCG00000016488	SSBP1	blue	-0.455373	0.101791	0.585627	0.0277756
ENSSSCG00000002127	CHD8	blue	-0.455274	0.101875	0.801676	0.000564479
ENSSSCG00000012840	CD151	blue	0.455091	0.10203	-0.872294	4.72987e-05
ENSSSCG00000012885	LRP5	blue	0.454335	0.102672	-0.544055	0.0443005
ENSSSCG00000008821	SLAIN2	blue	-0.454321	0.102685	0.990314	1.16746e-11
ENSSSCG00000011627	ACP3	blue	-0.454191	0.102795	0.984123	2.23463e-10
ENSSSCG00000041202	SREK1IP1	blue	-0.45385	0.103086	0.830582	0.000234494
ENSSSCG00000006196	SLCO5A1	blue	-0.453649	0.103258	0.945629	3.3156e-07
ENSSSCG00000011077	MSRB2	blue	0.453565	0.10333	-0.323345	0.259455
ENSSSCG00000037159	MNT	blue	0.453356	0.103509	-0.568382	0.0339449
ENSSSCG00000000504	PTPRB	blue	-0.453061	0.103761	0.729735	0.00305141
ENSSSCG00000007692		blue	-0.453016	0.103801	0.874406	4.29983e-05
ENSSSCG00000008591	ATAD2B	blue	-0.45253	0.104219	0.892911	1.72243e-05
ENSSSCG00000048358		blue	0.452123	0.104569	-0.829337	0.000244324
ENSSSCG00000026229		blue	-0.452061	0.104623	0.769773	0.00128219
ENSSSCG00000023139	METTL23	blue	-0.452044	0.104638	0.892002	1.80844e-05
ENSSSCG00000016603	HYAL4	blue	-0.451941	0.104727	0.890856	1.92166e-05
ENSSSCG00000017402	STAT5A	blue	0.451931	0.104735	-0.956189	9.28708e-08
ENSSSCG00000034219		blue	0.451653	0.104975	-0.666301	0.00927008
ENSSSCG00000038384	COX4I2	blue	0.45147	0.105133	-0.834558	0.000205215
ENSSSCG00000004912	SEC11C	blue	0.45117	0.105393	-0.833886	0.000209939
ENSSSCG00000039807		blue	0.450783	0.105729	-0.719503	0.00372118
ENSSSCG00000013312	HIPK3	blue	-0.450456	0.106014	0.963419	3.19713e-08
ENSSSCG00000013285	API5	blue	-0.450103	0.106322	0.617538	0.0186156
ENSSSCG00000000975	PANX2	blue	0.450084	0.106338	-0.53762	0.0473888
ENSSSCG00000001520	LEMD2	blue	0.449959	0.106448	-0.930293	1.42351e-06
ENSSSCG00000035376		blue	0.449816	0.106573	-0.551046	0.0411153
ENSSSCG00000047303		blue	0.449582	0.106777	-0.67017	0.00872613
ENSSSCG00000041313		blue	-0.4495	0.106849	0.207593	0.476379
ENSSSCG00000017548	NGFR	blue	0.449024	0.107266	-0.597991	0.0238979
ENSSSCG00000037635		blue	-0.448952	0.10733	0.582858	0.0287047
ENSSSCG00000014540		blue	-0.448747	0.10751	0.800615	0.000581406
ENSSSCG00000035914	PSMB2	blue	-0.448704	0.107548	0.712481	0.00424394
ENSSSCG00000051603		blue	-0.448692	0.107559	0.705097	0.00485406
ENSSSCG00000040106		blue	0.448624	0.107618	-0.512805	0.0607755
ENSSSCG00000007026	VDAC3	blue	-0.448418	0.1078	0.350645	0.219008
ENSSSCG00000033753	UBXN2A	blue	-0.448353	0.107857	0.965184	2.38534e-08
ENSSSCG00000001971	HECTD1	blue	-0.448058	0.108117	0.862018	7.3523e-05
ENSSSCG00000005066	EXOC5	blue	-0.448054	0.108121	0.954903	1.10159e-07
ENSSSCG00000016214	STK16	blue	0.447953	0.10821	-0.956102	9.39562e-08
ENSSSCG00000005038	PSMC6	blue	-0.447951	0.108212	0.91347	5.0186e-06
ENSSSCG00000000076	SGSM3	blue	0.44768	0.108451	-0.833352	0.000213763
ENSSSCG00000010811	KCTD3	blue	-0.447298	0.10879	0.908287	7.0334e-06
ENSSSCG00000004829	CACHD1	blue	0.446594	0.109415	-0.77562	0.00111403
ENSSSCG00000017902	CAMTA2	blue	0.446472	0.109524	-0.849766	0.000119129
ENSSSCG00000049958		blue	0.446127	0.109831	-0.629147	0.0159288
ENSSSCG00000002786	ELMO3	blue	0.446051	0.109899	-0.528049	0.0522675
ENSSSCG00000005704	EXOSC2	blue	-0.445933	0.110004	0.814666	0.000387432
ENSSSCG00000038756		blue	0.445874	0.110057	-0.896304	1.43072e-05
ENSSSCG00000038437	EHMT1	blue	0.445844	0.110084	-0.827316	0.00026099
ENSSSCG00000003637	MAP7D1	blue	0.445713	0.110201	-0.92383	2.38905e-06
ENSSSCG00000046167		blue	0.445668	0.110241	-0.484711	0.0789854
ENSSSCG00000031776		blue	0.445639	0.110268	-0.660613	0.0101169
ENSSSCG00000049535		blue	0.445183	0.110676	-0.750023	0.00200521
ENSSSCG00000007424	TNNC2	blue	0.444805	0.111015	-0.629276	0.0159007
ENSSSCG00000000959	LARGE1	blue	0.444756	0.111059	-0.664406	0.0095459
ENSSSCG00000044760		blue	0.444565	0.111231	-0.664428	0.00954263
ENSSSCG00000048856		blue	-0.444272	0.111495	0.65907	0.0103565
ENSSSCG00000029874	DUSP14	blue	-0.444131	0.111622	0.976404	2.36863e-09
ENSSSCG00000039591	SERINC3	blue	-0.443735	0.11198	0.69457	0.00584012
ENSSSCG00000047358		blue	-0.443496	0.112197	0.718226	0.00381222
ENSSSCG00000016406	ESYT2	blue	0.443395	0.112287	-0.913708	4.9388e-06
ENSSSCG00000028869	CAND1	blue	-0.443326	0.112351	0.922748	2.59392e-06
ENSSSCG00000036436	FZD1	blue	0.443184	0.112479	-0.870999	5.01027e-05
ENSSSCG00000010148	ERO1B	blue	0.443145	0.112515	-0.861463	7.52199e-05
ENSSSCG00000005660	TBC1D13	blue	0.443097	0.112558	-0.657443	0.0106139
ENSSSCG00000021380		blue	-0.442647	0.112967	0.870357	5.15432e-05
ENSSSCG00000040959	ZNF131	blue	-0.442551	0.113054	0.963555	3.12699e-08
ENSSSCG00000043957	RGL3	blue	0.442515	0.113087	-0.531603	0.0504154
ENSSSCG00000006925	KYAT3	blue	-0.442502	0.113099	0.90508	8.58251e-06
ENSSSCG00000006743	SLC22A15	blue	-0.442409	0.113184	0.445542	0.110354
ENSSSCG00000011423	GRM2	blue	-0.442299	0.113284	0.95515	1.06643e-07
ENSSSCG00000013340	MUC15	blue	0.441571	0.113949	-0.848453	0.000125142
ENSSSCG00000032053	ST8SIA5	blue	0.441476	0.114035	-0.791258	0.000749085
ENSSSCG00000003079		blue	-0.441429	0.114079	0.842722	0.000154327
ENSSSCG00000042975		blue	0.441326	0.114173	-0.520508	0.0563604
ENSSSCG00000035842	SUMO1	blue	-0.441254	0.114239	0.914569	4.65927e-06
ENSSSCG00000015610	SYT14	blue	0.441247	0.114245	-0.572841	0.0322608
ENSSSCG00000016604	WASL	blue	-0.44073	0.11472	0.954366	1.18129e-07
ENSSSCG00000049152		blue	-0.440704	0.114744	0.704042	0.00494658
ENSSSCG00000045995		blue	0.440685	0.114762	-0.740313	0.00246281
ENSSSCG00000011679	ATR	blue	-0.440608	0.114832	0.940686	5.52823e-07
ENSSSCG00000007451	SLC2A10	blue	0.440567	0.114871	-0.91165	5.66294e-06
ENSSSCG00000045590		blue	0.440476	0.114954	-0.539631	0.0464074
ENSSSCG00000028896	DIO1	blue	0.440366	0.115055	-0.507282	0.06409
ENSSSCG00000011600	SLC6A6	blue	0.440168	0.115238	-0.745766	0.00219671
ENSSSCG00000013511	HDGFL2	blue	0.440136	0.115267	-0.828684	0.000249616
ENSSSCG00000041050		blue	-0.440116	0.115286	0.65521	0.0109752
ENSSSCG00000037376		blue	0.440084	0.115316	-0.845269	0.000140744
ENSSSCG00000031489	DUSP22	blue	0.440007	0.115387	-0.693971	0.00590055
ENSSSCG00000051521		blue	-0.439875	0.115508	0.555898	0.0390057
ENSSSCG00000029391	PLSCR3	blue	0.439587	0.115775	-0.807939	0.000472438
ENSSSCG00000017624	CUEDC1	blue	0.439325	0.116017	-0.812341	0.000415279
ENSSSCG00000043934		blue	-0.439151	0.116178	0.784382	0.000895388
ENSSSCG00000017288	FTSJ3	blue	-0.439095	0.116231	0.52224	0.0554006
ENSSSCG00000014058	CLTB	blue	0.439035	0.116286	-0.812245	0.000416474
ENSSSCG00000039261	WSCD2	blue	0.438448	0.116831	-0.220813	0.448082
ENSSSCG00000041864		blue	0.438311	0.116959	-0.422438	0.13239
ENSSSCG00000038390	HELT	blue	0.438175	0.117086	-0.850927	0.000114014
ENSSSCG00000007995	MCRIP2	blue	0.437637	0.117588	-0.357807	0.209091
ENSSSCG00000010115	GSC2	blue	-0.437468	0.117746	0.824793	0.000283075
ENSSSCG00000027725		blue	-0.437002	0.118183	0.820409	0.000325026
ENSSSCG00000021118	GSPT1	blue	-0.436867	0.118309	0.900676	1.11566e-05
ENSSSCG00000002276	PLEKHG3	blue	0.436573	0.118585	-0.706046	0.00477203
ENSSSCG00000006060	GRHL2	blue	0.436534	0.118623	-0.870186	5.19314e-05
ENSSSCG00000014168	ELL2	blue	-0.436525	0.118631	0.956362	9.07259e-08
ENSSSCG00000033161	HNRNPH2	blue	-0.436248	0.118892	0.746095	0.00218141
ENSSSCG00000025315	SEPSECS	blue	-0.436062	0.119067	0.872273	4.73431e-05
ENSSSCG00000021466	BMT2	blue	-0.436048	0.119081	0.792593	0.000723044
ENSSSCG00000025941	PTP4A1	blue	-0.435943	0.119179	0.729323	0.00307641
ENSSSCG00000015697	CCNT2	blue	-0.435796	0.119318	0.531196	0.0506249
ENSSSCG00000024081	NRBF2	blue	-0.435439	0.119655	0.972671	5.67137e-09
ENSSSCG00000040344	TES	blue	0.435349	0.119741	-0.857364	8.87742e-05
ENSSSCG00000014427	FBXO38	blue	-0.434979	0.120091	0.711258	0.00434061
ENSSSCG00000006346	ATF6	blue	-0.434347	0.120692	0.925524	2.09535e-06
ENSSSCG00000038990	PTPRT	blue	0.434196	0.120835	-0.786185	0.000854992
ENSSSCG00000024881	TCP11L2	blue	-0.434141	0.120888	0.977496	1.78658e-09
ENSSSCG00000015009	POGLUT3	blue	-0.434134	0.120895	0.920934	2.96953e-06
ENSSSCG00000011904	UPK1B	blue	0.433976	0.121045	-0.436061	0.119068
ENSSSCG00000051473		blue	-0.433894	0.121124	0.691143	0.00619268
ENSSSCG00000026953	TPGS2	blue	0.433682	0.121325	-0.948825	2.32121e-07
ENSSSCG00000032605		blue	0.433606	0.121399	-0.634617	0.0147703
ENSSSCG00000045418		blue	-0.433489	0.12151	0.906151	8.0371e-06
ENSSSCG00000012594	IL13RA2	blue	-0.433346	0.121647	0.516798	0.0584568
ENSSSCG00000011506	UBA3	blue	-0.433329	0.121664	0.793459	0.00070654
ENSSSCG00000038112	SPDYC	blue	-0.433294	0.121696	0.270961	0.348751
ENSSSCG00000034266	CACNA1H	blue	0.433052	0.121929	-0.41612	0.138895
ENSSSCG00000014338	HSPA9	blue	-0.432848	0.122124	0.728196	0.00314558
ENSSSCG00000003172	KASH5	blue	0.432736	0.122232	-0.671971	0.00848151
ENSSSCG00000047237		blue	0.432733	0.122235	-0.697576	0.00554393
ENSSSCG00000004088	ARMT1	blue	-0.432375	0.122578	0.918553	3.52957e-06
ENSSSCG00000045068		blue	0.432111	0.122833	-0.565774	0.0349595
ENSSSCG00000013658	S1PR2	blue	0.431974	0.122964	-0.757945	0.00168419
ENSSSCG00000023762	TRPM2	blue	0.431967	0.122971	-0.796512	0.00065076
ENSSSCG00000035119	MTMR6	blue	0.431837	0.123097	-0.818223	0.000347749
ENSSSCG00000015689	DARS1	blue	-0.431687	0.123242	0.950567	1.8929e-07
ENSSSCG00000036524		blue	-0.431658	0.12327	0.677829	0.00772233
ENSSSCG00000005976	NDUFB9	blue	-0.431592	0.123333	0.813878	0.0003967
ENSSSCG00000028947	PELI1	blue	-0.431547	0.123377	0.92677	1.89875e-06
ENSSSCG00000010183	COG2	blue	-0.431361	0.123556	0.600266	0.0232313
ENSSSCG00000034727	CCDC24	blue	0.431251	0.123662	-0.873916	4.39669e-05
ENSSSCG00000051403		blue	-0.430772	0.124127	0.718963	0.00375948
ENSSSCG00000048508		blue	-0.430473	0.124417	0.887852	2.2465e-05
ENSSSCG00000043529		blue	-0.430415	0.124474	0.793782	0.000700465
ENSSSCG00000008018	MAPK8IP3	blue	0.430262	0.124622	-0.449052	0.107242
ENSSSCG00000045760		blue	-0.430235	0.124648	0.541877	0.0453289
ENSSSCG00000009562	GRK1	blue	-0.430235	0.124648	0.541877	0.0453289
ENSSSCG00000038229	EML2	blue	0.430126	0.124754	-0.782664	0.000935285
ENSSSCG00000008988	CCNG2	blue	-0.430107	0.124773	0.771351	0.00123495
ENSSSCG00000008218	RNF103	blue	-0.429836	0.125037	0.960274	5.20814e-08
ENSSSCG00000050375		blue	-0.429698	0.125171	0.606363	0.0215135
ENSSSCG00000005466	PTBP3	blue	-0.429226	0.125632	0.844337	0.000145595
ENSSSCG00000033750		blue	0.429032	0.125822	-0.854234	0.000100405
ENSSSCG00000006063	PABPC1	blue	-0.428911	0.125941	0.97324	5.00492e-09
ENSSSCG00000007356	PLCG1	blue	0.428655	0.126192	-0.674983	0.00808426
ENSSSCG00000037764	POU6F2	blue	0.428595	0.126251	-0.59415	0.025056
ENSSSCG00000014091	F2RL1	blue	0.428438	0.126405	-0.925637	2.07688e-06
ENSSSCG00000025218	TXNL4B	blue	-0.428313	0.126527	0.8075	0.00047847
ENSSSCG00000004617	FAM214A	blue	-0.427917	0.126917	0.961581	4.27291e-08
ENSSSCG00000042265		blue	0.427634	0.127196	-0.662606	0.00981362
ENSSSCG00000020796	SPOP	blue	-0.427536	0.127293	0.957522	7.73734e-08
ENSSSCG00000001546	FANCE	blue	0.427471	0.127357	-0.484015	0.0794803
ENSSSCG00000008485		blue	-0.427404	0.127423	0.468246	0.0912868
ENSSSCG00000016620	TSPAN12	blue	0.42734	0.127486	-0.51598	0.0589267
ENSSSCG00000037854	L3HYPDH	blue	0.427323	0.127503	-0.831434	0.000227954
ENSSSCG00000038028		blue	0.42726	0.127565	-0.898943	1.23294e-05
ENSSSCG00000002138	OSGEP	blue	-0.427226	0.127598	0.589313	0.0265738
ENSSSCG00000013855	FAM32A	blue	-0.427092	0.127731	0.617995	0.0185038
ENSSSCG00000023091		blue	0.426985	0.127837	-0.679448	0.00752208
ENSSSCG00000012335	FGD1	blue	-0.426968	0.127854	0.504142	0.066031
ENSSSCG00000032658	TRAF4	blue	0.426794	0.128026	-0.625869	0.0166553
ENSSSCG00000003207	IZUMO2	blue	-0.426633	0.128186	0.512282	0.0610839
ENSSSCG00000036766	SLC49A4	blue	-0.426582	0.128237	0.975438	3.00678e-09
ENSSSCG00000003360	WRAP73	blue	0.426567	0.128251	-0.67889	0.00759067
ENSSSCG00000016094	BZW1	blue	-0.426145	0.12867	0.391997	0.165683
ENSSSCG00000050133		blue	-0.426106	0.128709	0.787125	0.000834505
ENSSSCG00000040904	CLDN1	blue	0.425934	0.12888	-0.927404	1.80479e-06
ENSSSCG00000009162	SLC9B1	blue	-0.425812	0.129001	0.946108	3.14741e-07
ENSSSCG00000024927	STX12	blue	-0.425628	0.129184	0.681691	0.00725137
ENSSSCG00000046608		blue	0.425591	0.129222	-0.548525	0.0422441
ENSSSCG00000011708	TSC22D2	blue	-0.425521	0.129291	0.913061	5.15763e-06
ENSSSCG00000036178	CCDC167	blue	0.425371	0.129441	-0.578335	0.0302722
ENSSSCG00000037516	MTF1	blue	-0.42509	0.129721	0.968612	1.29038e-08
ENSSSCG00000033700		blue	-0.424802	0.130009	0.957195	8.09604e-08
ENSSSCG00000010464	PPP1R3C	blue	-0.424744	0.130068	0.887133	2.33058e-05
ENSSSCG00000028635		blue	0.424616	0.130196	-0.382657	0.1769
ENSSSCG00000001638	MRPS10	blue	-0.424258	0.130555	0.850444	0.000116117
ENSSSCG00000014075	NSA2	blue	-0.424216	0.130597	0.78822	0.000811161
ENSSSCG00000002446		blue	-0.424057	0.130757	0.752082	0.00191747
ENSSSCG00000037507	BTBD9	blue	0.423925	0.130889	-0.860765	7.74025e-05
ENSSSCG00000047775		blue	-0.423807	0.131008	0.190814	0.513472
ENSSSCG00000023546		blue	0.423655	0.131161	-0.680296	0.00741884
ENSSSCG00000008873	GASK1B	blue	0.423549	0.131268	-0.647299	0.0123317
ENSSSCG00000029281	PCDHAC2	blue	0.423372	0.131446	-0.254744	0.37944
ENSSSCG00000049747		blue	0.423371	0.131447	-0.498316	0.0697427
ENSSSCG00000029854		blue	0.423371	0.131447	-0.498316	0.0697427
ENSSSCG00000032357	APPL1	blue	0.423132	0.131688	-0.941321	5.18966e-07
ENSSSCG00000013052		blue	-0.423123	0.131698	0.884009	2.72625e-05
ENSSSCG00000013078		blue	0.422724	0.1321	-0.446487	0.10951
ENSSSCG00000017154	CARD14	blue	0.422671	0.132154	-0.541977	0.0452812
ENSSSCG00000047734		blue	-0.422431	0.132397	0.576638	0.0308764
ENSSSCG00000046905		blue	-0.422431	0.132397	0.576638	0.0308764
ENSSSCG00000044021		blue	-0.422431	0.132397	0.576638	0.0308764
ENSSSCG00000033236	SMIM18	blue	0.422368	0.132461	-0.42504	0.129771
ENSSSCG00000010518	EXOSC1	blue	-0.422321	0.132509	0.823049	0.000299205
ENSSSCG00000006220	ARMC1	blue	-0.422309	0.132521	0.980562	7.46973e-10
ENSSSCG00000004713	TGM5	blue	0.422294	0.132536	-0.915968	4.23305e-06
ENSSSCG00000051706		blue	-0.422283	0.132547	0.68876	0.00644745
ENSSSCG00000048120		blue	-0.422211	0.13262	0.640885	0.013523
ENSSSCG00000016298	INPP5D	blue	0.422086	0.132746	-0.699147	0.00539389
ENSSSCG00000009994	MTMR3	blue	-0.42193	0.132905	0.945773	3.26437e-07
ENSSSCG00000003107	ARHGAP35	blue	0.421834	0.133003	-0.882413	2.94863e-05
ENSSSCG00000023437	ITPR1	blue	-0.421813	0.133024	0.570385	0.0331805
ENSSSCG00000032668	PRR12	blue	0.421808	0.133029	-0.782384	0.000941916
ENSSSCG00000046890		blue	-0.421717	0.133122	0.36906	0.194088
ENSSSCG00000006568	DENND4B	blue	0.42132	0.133526	-0.2544	0.380107
ENSSSCG00000004752	EXD1	blue	0.421256	0.133591	-0.523043	0.0549595
ENSSSCG00000025281	ARL6IP1	blue	0.421253	0.133594	-0.644993	0.0127505
ENSSSCG00000006171	CRISPLD1	blue	0.421207	0.133641	-0.570972	0.0329592
ENSSSCG00000036679	SORBS2	blue	0.420983	0.13387	-0.812434	0.000414141
ENSSSCG00000013032	GPR137	blue	0.420966	0.133887	-0.765675	0.00141169
ENSSSCG00000000036	PACSIN2	blue	0.420965	0.133888	-0.929201	1.55897e-06
ENSSSCG00000031168		blue	0.420851	0.134004	-0.444979	0.110859
ENSSSCG00000040203		blue	-0.420561	0.134301	0.905066	8.58976e-06
ENSSSCG00000008518	SLC30A6	blue	-0.420276	0.134592	0.799326	0.000602525
ENSSSCG00000021092	FAM53C	blue	-0.420203	0.134668	0.81946	0.000334737
ENSSSCG00000015281	PLEKHA6	blue	0.420126	0.134746	-0.758935	0.00164713
ENSSSCG00000022351	GSTO1	blue	-0.420116	0.134757	0.642447	0.0132251
ENSSSCG00000041508		blue	-0.419695	0.135188	0.534416	0.0489835
ENSSSCG00000031550	C1orf105	blue	0.419639	0.135247	-0.625987	0.0166289
ENSSSCG00000048855		blue	0.419478	0.135411	-0.709418	0.00448922
ENSSSCG00000034339	CBARP	blue	0.419244	0.135652	-0.528025	0.0522804
ENSSSCG00000016601	SPAM1	blue	-0.418962	0.135943	0.864279	6.69254e-05
ENSSSCG00000021075	TDRD1	blue	0.418653	0.136262	-0.86918	5.42715e-05
ENSSSCG00000002547	KLC1	blue	-0.418631	0.136285	0.988569	3.14363e-11
ENSSSCG00000009192	PDLIM5	blue	0.418479	0.136442	-0.946849	2.90104e-07
ENSSSCG00000038073	NOD2	blue	0.418154	0.136778	-0.726975	0.00322191
ENSSSCG00000041173		blue	0.417774	0.137172	-0.403458	0.152567
ENSSSCG00000049408		blue	-0.417527	0.137428	0.936106	8.55168e-07
ENSSSCG00000017543	CALCOCO2	blue	0.417467	0.137491	-0.8712	4.96585e-05
ENSSSCG00000018016	MAP2K4	blue	-0.417404	0.137557	0.869379	5.38011e-05
ENSSSCG00000017968	CNTROB	blue	0.417152	0.137819	-0.748114	0.00208938
ENSSSCG00000001982		blue	0.417005	0.137972	-0.658197	0.010494
ENSSSCG00000037044	NME9	blue	-0.416785	0.138201	0.826338	0.00026938
ENSSSCG00000025492	NUDT13	blue	0.416703	0.138286	-0.865665	6.31257e-05
ENSSSCG00000046779		blue	-0.416671	0.138319	0.357147	0.209993
ENSSSCG00000015411	PTPN12	blue	-0.416642	0.138349	0.901039	1.0923e-05
ENSSSCG00000048702		blue	0.415995	0.139026	-0.681616	0.00726036
ENSSSCG00000008738	CC2D2A	blue	-0.415975	0.139047	0.951676	1.65599e-07
ENSSSCG00000000035	TTLL1	blue	0.415971	0.139051	-0.785883	0.000861645
ENSSSCG00000014394	RNF14	blue	-0.415946	0.139078	0.949857	2.05874e-07
ENSSSCG00000008167	CNOT11	blue	0.415749	0.139284	-0.647509	0.0122943
ENSSSCG00000033805		blue	0.415555	0.139487	-0.68848	0.0064779
ENSSSCG00000010987	UBAP2	blue	0.415508	0.139537	-0.819273	0.00033668
ENSSSCG00000011672	RASA2	blue	-0.415178	0.139883	0.895197	1.52104e-05
ENSSSCG00000008540	PPP1CB	blue	-0.414802	0.140279	0.634874	0.0147175
ENSSSCG00000014970	MTMR2	blue	-0.414637	0.140452	0.969058	1.18529e-08
ENSSSCG00000012680	GPC3	blue	0.414621	0.14047	-0.555091	0.0393509
ENSSSCG00000038089	COL18A1	blue	0.414436	0.140664	-0.68533	0.00682837
ENSSSCG00000010399	NCOA4	blue	-0.414411	0.140691	0.936599	8.17216e-07
ENSSSCG00000036100		blue	0.414348	0.140757	-0.737187	0.00262648
ENSSSCG00000032078	ZNF362	blue	0.414323	0.140784	-0.792547	0.000723936
ENSSSCG00000010440		blue	-0.414187	0.140927	0.886462	2.41139e-05
ENSSSCG00000031538	RNASE4	blue	0.414179	0.140936	-0.921917	2.76083e-06
ENSSSCG00000008762	STIM2	blue	0.414098	0.141022	-0.929375	1.53675e-06
ENSSSCG00000003353	SLC35E2B	blue	0.413992	0.141133	-0.748879	0.00205531
ENSSSCG00000005629	PIP5KL1	blue	-0.413831	0.141303	0.705542	0.00481547
ENSSSCG00000048860		blue	-0.413495	0.14166	0.698543	0.00545114
ENSSSCG00000046203		blue	-0.413248	0.141921	0.487054	0.0773353
ENSSSCG00000001549	FKBP5	blue	0.413018	0.142165	-0.786071	0.000857503
ENSSSCG00000012144	GRPR	blue	0.412502	0.142715	-0.598245	0.0238229
ENSSSCG00000030196	CUL9	blue	0.412485	0.142733	-0.41965	0.135234
ENSSSCG00000003102		blue	0.412053	0.143193	-0.772855	0.0011912
ENSSSCG00000032655	ALYREF	blue	0.411997	0.143253	-0.654443	0.0111015
ENSSSCG00000008164	MAP4K4	blue	0.411839	0.143422	-0.776363	0.00109398
ENSSSCG00000009530		blue	0.411518	0.143766	-0.210767	0.469509
ENSSSCG00000042103		blue	-0.410875	0.144455	0.717195	0.00388707
ENSSSCG00000030351	MEF2B	blue	0.410858	0.144473	-0.561633	0.0366164
ENSSSCG00000035101	KLF5	blue	-0.410454	0.144907	0.925725	2.06246e-06
ENSSSCG00000035211	GCC1	blue	-0.410266	0.14511	0.718081	0.00382271
ENSSSCG00000037360	CST3	blue	-0.410036	0.145358	0.675635	0.00800029
ENSSSCG00000016605	LMOD2	blue	-0.4096	0.145828	0.757519	0.00170033
ENSSSCG00000003183	RRAS	blue	0.409572	0.145859	-0.622191	0.0175004
ENSSSCG00000051684		blue	-0.409374	0.146073	0.495018	0.0719091
ENSSSCG00000000708	TNFRSF1A	blue	0.409152	0.146313	-0.744738	0.00224503
ENSSSCG00000011045	MINDY3	blue	-0.409149	0.146317	0.947027	2.84459e-07
ENSSSCG00000035791	SIX5	blue	0.409114	0.146354	-0.415821	0.139208
ENSSSCG00000016919	SETD9	blue	-0.408948	0.146534	0.6246	0.0169433
ENSSSCG00000012679	GPC4	blue	0.408269	0.147272	-0.90038	1.13506e-05
ENSSSCG00000045890	UFM1	blue	-0.407977	0.147589	0.882481	2.9389e-05
ENSSSCG00000037880	NSMF	blue	0.407962	0.147606	-0.795981	0.000660209
ENSSSCG00000025134	FAM171B	blue	0.407583	0.14802	-0.960522	5.01865e-08
ENSSSCG00000030303	ACHE	blue	0.407208	0.148429	-0.692831	0.00601696
ENSSSCG00000005106	NTRK3	blue	0.40686	0.148809	-0.595076	0.024773
ENSSSCG00000051294		blue	-0.406771	0.148908	0.851411	0.000111934
ENSSSCG00000038410	CPEB2	blue	-0.406509	0.149194	0.931228	1.31546e-06
ENSSSCG00000011226	TGFBR2	blue	0.406421	0.149291	-0.773092	0.00118444
ENSSSCG00000037869	NDUFA5	blue	-0.406371	0.149346	0.783172	0.000923344
ENSSSCG00000013276	PRDM11	blue	0.406234	0.149497	-0.462405	0.0959548
ENSSSCG00000043948		blue	-0.406052	0.149696	0.455903	0.101343
ENSSSCG00000051009		blue	0.405644	0.150146	-0.453967	0.102986
ENSSSCG00000005186	TTC39B	blue	0.405321	0.150502	-0.943882	3.9931e-07
ENSSSCG00000032083	MRPL37	blue	-0.40504	0.150812	0.772699	0.00119568
ENSSSCG00000024513	KLHL18	blue	-0.404676	0.151214	0.883394	2.81024e-05
ENSSSCG00000050949		blue	0.404161	0.151786	-0.517942	0.0578048
ENSSSCG00000007162	UBOX5	blue	0.404153	0.151795	-0.485175	0.0786565
ENSSSCG00000000443	GLI1	blue	0.403973	0.151995	-0.843374	0.000150751
ENSSSCG00000046624		blue	0.403877	0.152101	-0.770266	0.0012673
ENSSSCG00000039052	ZNF397	blue	0.403793	0.152194	-0.787429	0.000827979
ENSSSCG00000035873	SPRING1	blue	0.403112	0.152953	-0.893567	1.66255e-05
ENSSSCG00000040503	LRRC45	blue	0.403083	0.152985	-0.809888	0.000446396
ENSSSCG00000030603	TATDN1	blue	-0.402981	0.153099	0.823834	0.000291861
ENSSSCG00000045895		blue	-0.402936	0.153149	0.46384	0.094793
ENSSSCG00000014910		blue	-0.402548	0.153583	0.571405	0.0327962
ENSSSCG00000045778		blue	-0.402383	0.153767	0.372922	0.189103
ENSSSCG00000040811	PYCARD	blue	0.402315	0.153844	-0.448514	0.107715
ENSSSCG00000009932	MMAB	blue	-0.401703	0.154529	0.463357	0.0951824
ENSSSCG00000013512	PLIN4	blue	0.40149	0.154769	-0.724886	0.00335581
ENSSSCG00000041900		blue	0.401393	0.154878	-0.580706	0.0294428
ENSSSCG00000011438	BAP1	blue	0.401367	0.154907	-0.759766	0.00161651
ENSSSCG00000039635		blue	-0.401285	0.155	0.92962	1.50579e-06
ENSSSCG00000015872	GPD2	blue	0.401153	0.155148	-0.80721	0.000482487
ENSSSCG00000051689		blue	-0.400908	0.155423	0.816462	0.000366957
ENSSSCG00000050721		blue	-0.400819	0.155524	0.262258	0.365046
ENSSSCG00000014835	C2CD3	blue	-0.400769	0.155581	0.945331	3.42381e-07
ENSSSCG00000022306	ROPN1L	blue	0.400706	0.155652	-0.890047	2.00513e-05
ENSSSCG00000004247	ASF1A	blue	-0.400664	0.155699	0.310173	0.280471
ENSSSCG00000040056		blue	-0.400394	0.156004	0.701501	0.00517495
ENSSSCG00000004263	ZUP1	blue	-0.400391	0.156007	0.73051	0.00300486
ENSSSCG00000015632		blue	0.399956	0.1565	-0.653627	0.0112371
ENSSSCG00000030359	ARHGEF3	blue	-0.399924	0.156536	0.957164	8.13106e-08
ENSSSCG00000010504	BLNK	blue	0.39991	0.156552	-0.90335	9.52847e-06
ENSSSCG00000028293	RCOR3	blue	-0.39982	0.156654	0.922292	2.68437e-06
ENSSSCG00000028343	MRPL9	blue	-0.399689	0.156802	0.752512	0.00189953
ENSSSCG00000015342	COL28A1	blue	0.399635	0.156863	-0.539601	0.0464218
ENSSSCG00000037001	PPM1N	blue	-0.399468	0.157053	0.445853	0.110076
ENSSSCG00000042395		blue	0.399214	0.157341	-0.299944	0.297461
ENSSSCG00000014302	CDKL3	blue	0.399173	0.157388	-0.570232	0.0332387
ENSSSCG00000008339	GFPT1	blue	0.399009	0.157575	-0.720815	0.00362938
ENSSSCG00000048624		blue	0.398726	0.157896	-0.582341	0.0288809
ENSSSCG00000051662		blue	0.398692	0.157934	-0.849721	0.000119333
ENSSSCG00000016403	VIPR2	blue	0.398652	0.15798	-0.782944	0.000928693
ENSSSCG00000011639	SRPRB	blue	-0.398228	0.158464	0.914277	4.7527e-06
ENSSSCG00000016686	PRR15	blue	-0.398068	0.158646	0.690364	0.00627512
ENSSSCG00000003044	LYPD4	blue	0.397931	0.158804	0.21967	0.450496
ENSSSCG00000016434	RHEB	blue	-0.397822	0.158928	0.948802	2.32741e-07
ENSSSCG00000029198	CUL5	blue	-0.397722	0.159042	0.815041	0.000383081
ENSSSCG00000000169	POLR3B	blue	-0.397608	0.159173	0.929686	1.49755e-06
ENSSSCG00000002891		blue	0.397602	0.15918	-0.695516	0.00574558
ENSSSCG00000012336	GNL3L	blue	-0.397483	0.159316	0.908461	6.95609e-06
ENSSSCG00000013294	LDLRAD3	blue	0.397229	0.159607	-0.797965	0.00062548
ENSSSCG00000024134	MGLL	blue	0.396959	0.159918	-0.946847	2.90167e-07
ENSSSCG00000036961	PCDHB7	blue	0.396942	0.159937	-0.600128	0.0232712
ENSSSCG00000049029		blue	-0.396901	0.159984	0.433298	0.121693
ENSSSCG00000036705	RPH3AL	blue	0.396881	0.160007	-0.84067	0.000166028
ENSSSCG00000015446	PNPLA8	blue	-0.396851	0.160041	0.901086	1.08935e-05
ENSSSCG00000001985	CBLN3	blue	0.396749	0.160159	-0.793135	0.000712686
ENSSSCG00000015535	QSOX1	blue	0.396635	0.16029	-0.586946	0.0273408
ENSSSCG00000012150	REPS2	blue	0.39632	0.160652	-0.858952	8.33063e-05
ENSSSCG00000033358	VPS37D	blue	0.395764	0.161294	-0.871552	4.88891e-05
ENSSSCG00000016629		blue	0.395691	0.161378	-0.691715	0.00613268
ENSSSCG00000038434		blue	0.395405	0.161709	-0.385158	0.17385
ENSSSCG00000035196	BTBD8	blue	0.395396	0.161719	-0.75209	0.00191714
ENSSSCG00000007030	IKBKB	blue	0.394974	0.162207	-0.77784	0.00105497
ENSSSCG00000013867	SIN3B	blue	-0.39485	0.162352	0.686063	0.00674556
ENSSSCG00000009480	NDFIP2	blue	-0.394724	0.162498	0.977715	1.68555e-09
ENSSSCG00000026068	GRHL1	blue	-0.394507	0.16275	0.537814	0.0472932
ENSSSCG00000028126	MPPE1	blue	0.394357	0.162924	-0.307866	0.284252
ENSSSCG00000010212		blue	0.394156	0.163158	-0.582595	0.0287943
ENSSSCG00000005979	ANXA13	blue	-0.394006	0.163333	0.492423	0.0736466
ENSSSCG00000010757	EBF3	blue	0.393911	0.163443	-0.404758	0.151124
ENSSSCG00000036537	NFIC	blue	0.393697	0.163693	-0.958305	6.93215e-08
ENSSSCG00000009798	B3GNT4	blue	0.393461	0.163968	-0.556802	0.0386219
ENSSSCG00000024814	PFKFB1	blue	-0.39321	0.164261	0.285957	0.321637
ENSSSCG00000031634		blue	-0.393157	0.164324	0.745593	0.00220476
ENSSSCG00000001792	EFL1	blue	-0.392972	0.164539	0.980524	7.55666e-10
ENSSSCG00000006390	CASQ1	blue	-0.392695	0.164863	0.629661	0.0158171
ENSSSCG00000012018	CHODL	blue	0.392504	0.165088	-0.922634	2.61617e-06
ENSSSCG00000017063	SGCD	blue	0.392324	0.165299	-0.81764	0.00035401
ENSSSCG00000047823		blue	-0.392294	0.165334	0.766627	0.00138072
ENSSSCG00000004935	HACD3	blue	0.392177	0.165471	-0.90673	7.75386e-06
ENSSSCG00000036466	METTL21A	blue	0.392161	0.16549	-0.779631	0.00100919
ENSSSCG00000033616		blue	-0.392048	0.165623	0.792383	0.000727095
ENSSSCG00000039587		blue	0.392009	0.165669	-0.904257	9.02213e-06
ENSSSCG00000024771	TICAM1	blue	0.391748	0.165976	-0.568703	0.0338215
ENSSSCG00000007782	SETD1A	blue	0.391672	0.166066	-0.730394	0.00301183
ENSSSCG00000019939		blue	-0.391582	0.166171	0.352164	0.216881
ENSSSCG00000005501	TRIM32	blue	0.391485	0.166286	-0.707484	0.0046498
ENSSSCG00000030632	UBE2V1	blue	-0.391225	0.166593	0.783443	0.000917018
ENSSSCG00000030833		blue	-0.391201	0.166621	0.403956	0.152013
ENSSSCG00000016874	PAIP1	blue	-0.390948	0.166919	0.706407	0.00474113
ENSSSCG00000045927		blue	-0.390565	0.167373	0.283689	0.325659
ENSSSCG00000019687	SNORA41	blue	-0.390204	0.1678	-0.47578	0.0855032
ENSSSCG00000003238	SPACA6	blue	-0.390078	0.167949	0.908622	6.88564e-06
ENSSSCG00000015335	DYNC1I1	blue	-0.389973	0.168073	0.809128	0.000456413
ENSSSCG00000047798		blue	0.389565	0.168558	-0.621246	0.0177227
ENSSSCG00000043375		blue	0.389374	0.168785	-0.605634	0.0217137
ENSSSCG00000010543	ABCC2	blue	0.389302	0.16887	-0.406071	0.149675
ENSSSCG00000040554	COL9A3	blue	0.389225	0.168963	-0.530291	0.0510935
ENSSSCG00000043348		blue	-0.389161	0.169039	0.71566	0.00400058
ENSSSCG00000040154	MRPL36	blue	0.389153	0.169049	-0.603699	0.0222516
ENSSSCG00000043888		blue	-0.388975	0.169261	0.398399	0.158269
ENSSSCG00000027852		blue	0.388846	0.169414	-0.405011	0.150844
ENSSSCG00000035968	LMX1B	blue	0.388753	0.169525	-0.568018	0.0340851
ENSSSCG00000051737		blue	-0.388453	0.169884	0.421292	0.133554
ENSSSCG00000022083	ANKS1B	blue	0.38834	0.170018	-0.302286	0.29352
ENSSSCG00000014038	FAM193B	blue	0.388278	0.170092	-0.317693	0.268354
ENSSSCG00000034501	RIOX2	blue	-0.388079	0.170331	0.946705	2.94769e-07
ENSSSCG00000035571		blue	0.388074	0.170336	-0.546423	0.0432021
ENSSSCG00000047446		blue	-0.38776	0.170712	0.447148	0.108923
ENSSSCG00000041523		blue	-0.387646	0.170849	0.840243	0.000168551
ENSSSCG00000006745	CASQ2	blue	0.387611	0.170891	-0.948315	2.46073e-07
ENSSSCG00000002400		blue	-0.387215	0.171366	0.758154	0.0016763
ENSSSCG00000007567	CHST12	blue	0.387141	0.171455	-0.790454	0.000765121
ENSSSCG00000037400		blue	0.386678	0.172012	-0.603487	0.0223112
ENSSSCG00000012132	ASB9	blue	0.386666	0.172027	-0.709161	0.00451032
ENSSSCG00000014169	PCSK1	blue	-0.386537	0.172183	0.790467	0.000764868
ENSSSCG00000034623		blue	0.386048	0.172773	-0.755181	0.00179116
ENSSSCG00000011201	SATB1	blue	0.385976	0.172859	-0.699735	0.00533856
ENSSSCG00000004472	IRAK1BP1	blue	-0.385924	0.172922	0.640346	0.013627
ENSSSCG00000004509	LIPG	blue	0.385357	0.173609	-0.754508	0.00181801
ENSSSCG00000048556		blue	-0.384849	0.174224	0.773796	0.00116447
ENSSSCG00000024565		blue	-0.384566	0.174569	0.524205	0.0543259
ENSSSCG00000003702	GATA6	blue	0.384384	0.174791	-0.68978	0.0063374
ENSSSCG00000037358	HPS5	blue	-0.384358	0.174821	0.731378	0.00295338
ENSSSCG00000021206	IL1RAP	blue	0.38427	0.174929	-0.830668	0.000233826
ENSSSCG00000009755	AACS	blue	0.384225	0.174984	-0.680222	0.0074279
ENSSSCG00000041146		blue	-0.384143	0.175084	0.661252	0.0100188
ENSSSCG00000001903	EDC3	blue	-0.38386	0.175429	0.949587	2.12506e-07
ENSSSCG00000032735	INAVA	blue	0.383847	0.175444	-0.825666	0.000275268
ENSSSCG00000024232	CCDC91	blue	-0.383757	0.175555	0.822484	0.000304594
ENSSSCG00000010485	TBC1D12	blue	0.383755	0.175557	-0.947571	2.67677e-07
ENSSSCG00000041481		blue	0.383736	0.17558	-0.930303	1.42242e-06
ENSSSCG00000011857	LMLN	blue	0.383472	0.175902	-0.655838	0.0108728
ENSSSCG00000007475	MOCS3	blue	-0.38322	0.17621	0.804743	0.000517756
ENSSSCG00000001235	TRIM15	blue	0.382972	0.176515	-0.670804	0.00863937
ENSSSCG00000039188	AK8	blue	0.382798	0.176728	-0.722577	0.00350893
ENSSSCG00000029478	CUL4B	blue	-0.382646	0.176913	0.877558	3.71798e-05
ENSSSCG00000034154	WNK2	blue	0.382616	0.176951	-0.905471	8.38017e-06
ENSSSCG00000033018	TM4SF1	blue	0.382535	0.17705	-0.715183	0.00403637
ENSSSCG00000010550	CWF19L1	blue	-0.382338	0.177292	0.579679	0.0298
ENSSSCG00000013763	DCAF15	blue	0.382119	0.177561	-0.923487	2.45251e-06
ENSSSCG00000012305	USP27X	blue	0.382075	0.177615	-0.667608	0.00908347
ENSSSCG00000049217		blue	-0.382062	0.177631	0.623075	0.0172944
ENSSSCG00000050273		blue	0.38199	0.177719	-0.424343	0.13047
ENSSSCG00000033739		blue	-0.381818	0.177932	0.374335	0.187299
ENSSSCG00000020791	SNORD23	blue	0.381813	0.177938	-0.44262	0.112992
ENSSSCG00000048235		blue	0.381619	0.178177	-0.75754	0.00169953
ENSSSCG00000009717	CBR4	blue	0.381435	0.178403	-0.826667	0.000266536
ENSSSCG00000010517		blue	-0.381373	0.17848	0.823961	0.00029068
ENSSSCG00000002025	SLC22A17	blue	0.381202	0.17869	-0.372551	0.189578
ENSSSCG00000029203		blue	-0.380583	0.179456	0.938799	6.64343e-07
ENSSSCG00000008179	REV1	blue	-0.380216	0.179911	0.834453	0.000205948
ENSSSCG00000033723		blue	0.380137	0.180008	-0.725395	0.00332278
ENSSSCG00000037710	ZNF473	blue	-0.380041	0.180128	0.307841	0.284294
ENSSSCG00000043942		blue	-0.379553	0.180734	0.71287	0.00421356
ENSSSCG00000003709	LAMA3	blue	0.379402	0.180923	-0.890443	1.96393e-05
ENSSSCG00000049383		blue	0.37922	0.181149	-0.239789	0.40897
ENSSSCG00000045419		blue	0.378624	0.181891	-0.831756	0.000225513
ENSSSCG00000036107		blue	0.378483	0.182068	-0.655261	0.0109668
ENSSSCG00000009250	PRKG2	blue	-0.378389	0.182185	0.805744	0.000503204
ENSSSCG00000024776	SNRPG	blue	-0.378046	0.182615	0.884486	2.66251e-05
ENSSSCG00000042439		blue	-0.378031	0.182633	0.881689	3.05427e-05
ENSSSCG00000020439	RNaseP_nuc	blue	-0.377978	0.1827	0.49509	0.0718611
ENSSSCG00000041479		blue	0.377942	0.182745	-0.723144	0.00347082
ENSSSCG00000007951	CREBBP	blue	-0.377864	0.182842	0.37438	0.187242
ENSSSCG00000031847	RBM28	blue	-0.377635	0.18313	0.649646	0.0119165
ENSSSCG00000038963	PRKX	blue	0.37703	0.18389	-0.816484	0.000366712
ENSSSCG00000031629	MOSMO	blue	0.37663	0.184393	-0.775454	0.00111852
ENSSSCG00000008813	CORIN	blue	0.376156	0.18499	-0.773467	0.00117377
ENSSSCG00000000419	RDH16	blue	0.376035	0.185144	-0.721079	0.0036111
ENSSSCG00000017533	HOXB2	blue	0.375911	0.1853	-0.782756	0.000933116
ENSSSCG00000023968	TSSK3	blue	0.375886	0.185332	-0.548272	0.0423585
ENSSSCG00000010174	EXOC8	blue	-0.375788	0.185456	0.584076	0.0282932
ENSSSCG00000044808		blue	0.375731	0.185528	-0.744209	0.00227023
ENSSSCG00000034733	CMAS	blue	0.375414	0.18593	-0.893034	1.71108e-05
ENSSSCG00000024096	RIPK2	blue	-0.375181	0.186225	0.878122	3.62093e-05
ENSSSCG00000008549	SLC4A1AP	blue	-0.375107	0.186318	0.777592	0.00106146
ENSSSCG00000014041	MXD3	blue	-0.375028	0.186418	0.543622	0.0445035
ENSSSCG00000009771	DDX55	blue	-0.374772	0.186743	0.713081	0.00419717
ENSSSCG00000000500		blue	-0.374658	0.186889	0.94671	2.94602e-07
ENSSSCG00000013401	DKK3	blue	0.37455	0.187025	-0.868407	5.61262e-05
ENSSSCG00000042777		blue	-0.374337	0.187296	0.535239	0.04857
ENSSSCG00000001765	ADAMTS7	blue	0.373908	0.187842	-0.822316	0.000306203
ENSSSCG00000005072	PSMA3	blue	-0.373902	0.187851	0.902671	9.92167e-06
ENSSSCG00000009474	SCEL	blue	0.373821	0.187954	-0.893107	1.70435e-05
ENSSSCG00000024587		blue	-0.373623	0.188206	0.667886	0.0090441
ENSSSCG00000007818	KDM8	blue	0.373556	0.188292	-0.374666	0.186878
ENSSSCG00000012667	IGSF1	blue	-0.373144	0.188818	0.677559	0.0077562
ENSSSCG00000008529	YPEL5	blue	-0.373059	0.188927	0.877137	3.79169e-05
ENSSSCG00000050399		blue	-0.372942	0.189077	0.580731	0.0294342
ENSSSCG00000011688		blue	-0.372686	0.189404	0.466047	0.0930248
ENSSSCG00000007984	MRPL28	blue	0.372326	0.189866	-0.367257	0.196445
ENSSSCG00000044281		blue	-0.3721	0.190157	0.925588	2.08486e-06
ENSSSCG00000007439	CDH22	blue	0.371854	0.190473	-0.898593	1.25778e-05
ENSSSCG00000014904	DLG2	blue	0.371836	0.190496	-0.922888	2.56657e-06
ENSSSCG00000006001	ENPP2	blue	0.371693	0.19068	-0.770417	0.00126276
ENSSSCG00000017201	UNK	blue	0.37154	0.190878	-0.728849	0.00310538
ENSSSCG00000035252	SMIM17	blue	0.371534	0.190885	-0.496784	0.070743
ENSSSCG00000043197		blue	0.371481	0.190953	-0.836465	0.000192262
ENSSSCG00000043219		blue	-0.371255	0.191245	0.676281	0.0079176
ENSSSCG00000049412		blue	-0.371203	0.191311	0.565279	0.0351547
ENSSSCG00000007743		blue	-0.371156	0.191372	0.713967	0.00412881
ENSSSCG00000003834	C8B	blue	-0.371116	0.191424	0.550777	0.0412346
ENSSSCG00000006361	PPOX	blue	0.371095	0.191451	-0.727158	0.00321034
ENSSSCG00000044411		blue	0.370398	0.192352	-0.689908	0.00632372
ENSSSCG00000000267	MYG1	blue	-0.370298	0.192481	0.513415	0.0604168
ENSSSCG00000031801		blue	0.370282	0.192502	-0.755003	0.00179823
ENSSSCG00000011765	USP13	blue	0.370131	0.192697	-0.49062	0.0748712
ENSSSCG00000033912	ATG12	blue	-0.370128	0.192701	0.702498	0.00508442
ENSSSCG00000028529	REM1	blue	0.369887	0.193014	-0.266142	0.357723
ENSSSCG00000040095	GPR35	blue	0.369849	0.193063	-0.471611	0.0886709
ENSSSCG00000021846	EFHC2	blue	-0.369794	0.193135	0.767746	0.001345
ENSSSCG00000023045		blue	0.369135	0.193991	-0.775529	0.00111648
ENSSSCG00000037314	TMCO1	blue	-0.368844	0.19437	0.827523	0.000259245
ENSSSCG00000011239	TRANK1	blue	0.368685	0.194577	-0.732684	0.00287725
ENSSSCG00000006245	SDR16C5	blue	-0.368557	0.194745	0.77706	0.00107542
ENSSSCG00000011162		blue	-0.368447	0.194887	0.857709	8.75603e-05
ENSSSCG00000011361	SLC26A6	blue	0.368276	0.195111	-0.84746	0.000129845
ENSSSCG00000045601	U3	blue	-0.36826	0.195131	0.655085	0.0109958
ENSSSCG00000003642	INPP5B	blue	-0.367794	0.195741	0.933141	1.11529e-06
ENSSSCG00000012117	PRPS2	blue	0.367569	0.196036	-0.84484	0.000142958
ENSSSCG00000038509	NOTCH1	blue	0.367468	0.196168	-0.813478	0.000401474
ENSSSCG00000048452		blue	0.367355	0.196316	-0.688082	0.00652138
ENSSSCG00000019715	SNORD94	blue	0.367122	0.196622	-0.416821	0.138163
ENSSSCG00000048634		blue	-0.367049	0.196718	0.363603	0.201275
ENSSSCG00000040917	U6	blue	-0.36701	0.19677	0.627454	0.016301
ENSSSCG00000045414		blue	-0.366891	0.196925	0.763298	0.00149144
ENSSSCG00000024492	EPHB1	blue	0.366884	0.196934	-0.9032	9.61409e-06
ENSSSCG00000042772		blue	-0.366848	0.196981	0.829959	0.000239373
ENSSSCG00000015780	STOX2	blue	-0.366494	0.197447	0.573016	0.0321961
ENSSSCG00000002774	RIPOR1	blue	0.366365	0.197617	-0.927111	1.84774e-06
ENSSSCG00000011664	RBP1	blue	-0.366232	0.197792	0.930747	1.37014e-06
ENSSSCG00000038248	LSM11	blue	0.366134	0.197921	-0.788751	0.000800031
ENSSSCG00000014447	SLC6A7	blue	0.365428	0.198853	-0.686853	0.00665715
ENSSSCG00000007861	GP2	blue	0.365406	0.198882	-0.402773	0.153331
ENSSSCG00000014999	KBTBD3	blue	0.364763	0.199734	-0.344399	0.227892
ENSSSCG00000002670	USP10	blue	-0.364497	0.200086	0.837929	0.000182775
ENSSSCG00000010863	AHCTF1	blue	-0.36419	0.200495	0.909547	6.49123e-06
ENSSSCG00000014972	CCDC82	blue	-0.363905	0.200873	0.59579	0.0245564
ENSSSCG00000051131		blue	-0.363793	0.201023	0.262456	0.364671
ENSSSCG00000034645	C3orf38	blue	-0.363251	0.201745	0.963519	3.14577e-08
ENSSSCG00000009601	SLC18A1	blue	0.363105	0.20194	-0.751477	0.00194292
ENSSSCG00000014197		blue	-0.363096	0.201951	0.565916	0.0349038
ENSSSCG00000047274		blue	-0.36294	0.20216	0.40821	0.147336
ENSSSCG00000010435	MINPP1	blue	-0.362683	0.202504	0.898881	1.23729e-05
ENSSSCG00000039714	MIPOL1	blue	-0.362599	0.202615	0.726204	0.00327082
ENSSSCG00000049187		blue	0.362476	0.202781	-0.483204	0.0800601
ENSSSCG00000000607	ART4	blue	-0.362285	0.203036	0.569825	0.0333931
ENSSSCG00000008785	FAM114A1	blue	0.362145	0.203224	-0.785617	0.000867558
ENSSSCG00000011940	DZIP3	blue	0.362128	0.203246	-0.444028	0.111715
ENSSSCG00000039760	PRR16	blue	0.361831	0.203644	-0.697037	0.00559613
ENSSSCG00000050029		blue	-0.361764	0.203735	0.480695	0.081871
ENSSSCG00000026722	PHF14	blue	-0.361662	0.203872	0.959986	5.43516e-08
ENSSSCG00000047691		blue	-0.361522	0.20406	0.818998	0.000339553
ENSSSCG00000005459	ECPAS	blue	-0.361458	0.204147	0.888582	2.16374e-05
ENSSSCG00000046058		blue	0.361397	0.204228	-0.65184	0.0115383
ENSSSCG00000015414	FAM185A	blue	-0.361313	0.204341	0.77353	0.00117198
ENSSSCG00000003513	ECE1	blue	0.360948	0.204832	-0.602159	0.0226873
ENSSSCG00000038663		blue	0.360944	0.204838	-0.837771	0.000183776
ENSSSCG00000026969	KRAS	blue	0.360681	0.205192	-0.83601	0.000195292
ENSSSCG00000025610	AGAP3	blue	0.360627	0.205265	-0.881272	3.11654e-05
ENSSSCG00000015943	GORASP2	blue	0.360403	0.205567	-0.747067	0.00213668
ENSSSCG00000035436	HAMP	blue	0.3604	0.205572	-0.454574	0.102469
ENSSSCG00000000853	NT5DC3	blue	-0.360354	0.205633	0.359848	0.206317
ENSSSCG00000021229	MAT2B	blue	-0.360171	0.20588	0.918789	3.47048e-06
ENSSSCG00000011822	OPA1	blue	-0.360119	0.205951	0.808372	0.000466544
ENSSSCG00000012328	HUWE1	blue	-0.36006	0.20603	0.921735	2.79851e-06
ENSSSCG00000035045	DOCK1	blue	0.35958	0.206681	-0.916296	4.13788e-06
ENSSSCG00000001613	TREML1	blue	-0.359446	0.206862	0.467141	0.0921574
ENSSSCG00000041901		blue	-0.359219	0.20717	0.835941	0.00019575
ENSSSCG00000028878	BCAR1	blue	0.359039	0.207415	-0.825709	0.000274895
ENSSSCG00000034258		blue	0.358945	0.207541	-0.511025	0.0618296
ENSSSCG00000021997	ALS2CL	blue	0.35894	0.207549	-0.76189	0.00154035
ENSSSCG00000030277	ENDOV	blue	0.358904	0.207598	-0.700458	0.00527111
ENSSSCG00000023393	ZBBX	blue	-0.358732	0.207831	0.688342	0.00649295
ENSSSCG00000045090	SNORD36	blue	-0.358669	0.207917	0.512795	0.0607814
ENSSSCG00000016044	ORMDL1	blue	0.357844	0.20904	-0.957125	8.17478e-08
ENSSSCG00000003790	ANKRD13C	blue	-0.356644	0.210682	0.950455	1.91831e-07
ENSSSCG00000012890	TCIRG1	blue	0.356632	0.210698	-0.787988	0.000816056
ENSSSCG00000000728	PARP11	blue	-0.356491	0.210892	0.531845	0.0502912
ENSSSCG00000045540		blue	-0.356461	0.210933	0.354632	0.213451
ENSSSCG00000000135	KCTD17	blue	-0.355912	0.211686	0.518727	0.0573599
ENSSSCG00000026939	LMAN2L	blue	0.355833	0.211795	-0.667774	0.00905995
ENSSSCG00000044326		blue	0.355776	0.211873	-0.666722	0.00920972
ENSSSCG00000000567	SOX5	blue	0.35564	0.212061	-0.669725	0.00878741
ENSSSCG00000008449	SLC3A1	blue	-0.355589	0.212131	0.919405	3.31987e-06
ENSSSCG00000007240	HCK	blue	-0.35552	0.212226	0.470719	0.0893591
ENSSSCG00000016840		blue	-0.355453	0.212319	0.724762	0.00336389
ENSSSCG00000006023	SYBU	blue	-0.355075	0.21284	0.794489	0.000687311
ENSSSCG00000013390		blue	-0.355009	0.212931	0.581921	0.0290244
ENSSSCG00000006930	SH3GLB1	blue	-0.354874	0.213117	0.966394	1.93428e-08
ENSSSCG00000042679		blue	0.354658	0.213416	-0.417986	0.136953
ENSSSCG00000016409	UBE3C	blue	0.354459	0.21369	-0.723878	0.00342197
ENSSSCG00000008966	PARM1	blue	0.35438	0.2138	-0.766682	0.00137894
ENSSSCG00000004834	NDN	blue	0.354274	0.213947	-0.446617	0.109395
ENSSSCG00000000873	ANO4	blue	0.354147	0.214123	-0.734063	0.00279852
ENSSSCG00000043364		blue	-0.353985	0.214348	0.562519	0.036257
ENSSSCG00000049828		blue	0.353363	0.215211	-0.744727	0.00224556
ENSSSCG00000037029	CSRNP2	blue	0.353334	0.215251	-0.5784	0.0302492
ENSSSCG00000048874		blue	-0.35333	0.215257	0.652923	0.0113549
ENSSSCG00000015536	LHX4	blue	0.35328	0.215325	-0.541137	0.0456822
ENSSSCG00000011300	EXOSC7	blue	-0.352711	0.216117	0.829781	0.000240779
ENSSSCG00000015080	CEP164	blue	0.352415	0.21653	-0.745695	0.0022
ENSSSCG00000010739	CTBP2	blue	-0.3523	0.216691	0.914926	4.54735e-06
ENSSSCG00000045966		blue	-0.352271	0.216732	0.65455	0.0110839
ENSSSCG00000003599		blue	-0.352203	0.216826	0.743193	0.00231927
ENSSSCG00000031476		blue	0.352094	0.216978	-0.613282	0.019682
ENSSSCG00000041247		blue	-0.352068	0.217015	0.25305	0.382726
ENSSSCG00000041406		blue	0.351537	0.217757	0.318115	0.267683
ENSSSCG00000010563	BTRC	blue	0.351461	0.217863	-0.732224	0.0029039
ENSSSCG00000050829		blue	-0.351446	0.217884	0.895524	1.49386e-05
ENSSSCG00000001245	POLR1H	blue	-0.35127	0.218131	0.852865	0.000105867
ENSSSCG00000019823	ssc-mir-23a	blue	0.351169	0.218272	-0.738061	0.00257988
ENSSSCG00000015473	TMEM183A	blue	-0.351097	0.218374	0.928664	1.62929e-06
ENSSSCG00000034360	CELSR2	blue	0.351065	0.218419	-0.916202	4.16497e-06
ENSSSCG00000000732	CRACR2A	blue	-0.350994	0.218517	0.502348	0.0671584
ENSSSCG00000029544	RAB2B	blue	-0.35096	0.218566	0.776032	0.00110287
ENSSSCG00000016715	OSBPL3	blue	0.350635	0.219023	-0.900963	1.09717e-05
ENSSSCG00000014448	ARSI	blue	0.350483	0.219235	-0.440454	0.114974
ENSSSCG00000006595	IVL	blue	-0.350162	0.219687	0.898193	1.28669e-05
ENSSSCG00000011367	ARIH2	blue	-0.34994	0.219999	0.669778	0.0087801
ENSSSCG00000028558	SGPP1	blue	0.349849	0.220127	-0.921203	2.91117e-06
ENSSSCG00000001720	SLC25A27	blue	-0.349408	0.220751	0.959441	5.88808e-08
ENSSSCG00000042389		blue	-0.349236	0.220994	0.649827	0.011885
ENSSSCG00000036185		blue	-0.348648	0.221825	0.658809	0.0103975
ENSSSCG00000005236	DMRT1	blue	0.348625	0.221858	-0.689821	0.00633302
ENSSSCG00000047116		blue	-0.348553	0.221959	0.844182	0.000146416
ENSSSCG00000004008	WDR27	blue	0.348519	0.222007	-0.729057	0.00309262
ENSSSCG00000012437	ATP7A	blue	-0.3482	0.22246	0.863389	6.9462e-05
ENSSSCG00000024403	PRRT1	blue	-0.348029	0.222702	0.687009	0.00663979
ENSSSCG00000012816	MTCP1	blue	-0.348001	0.222742	0.885945	2.47512e-05
ENSSSCG00000007004	INTS10	blue	-0.347985	0.222764	0.941123	5.29311e-07
ENSSSCG00000043291		blue	-0.347927	0.222848	0.837195	0.000187483
ENSSSCG00000017928		blue	0.347844	0.222964	-0.260584	0.368226
ENSSSCG00000016533	STRA8	blue	0.347638	0.223258	-0.409761	0.145655
ENSSSCG00000028677		blue	-0.34744	0.22354	0.654398	0.011109
ENSSSCG00000046422		blue	-0.346782	0.224477	0.56704	0.0344641
ENSSSCG00000001689	GTPBP2	blue	-0.346313	0.225146	0.891263	1.88083e-05
ENSSSCG00000039171	MRTFB	blue	0.346034	0.225545	-0.940878	5.42408e-07
ENSSSCG00000044077		blue	-0.345093	0.226894	0.259881	0.369567
ENSSSCG00000026606	PAIP2	blue	-0.345058	0.226944	0.827162	0.000262296
ENSSSCG00000040264	CLASRP	blue	0.345056	0.226947	-0.554898	0.0394338
ENSSSCG00000010802	UCHL5	blue	-0.344903	0.227167	0.948031	2.54142e-07
ENSSSCG00000030291	RPRD2	blue	-0.344206	0.22817	0.822604	0.000303437
ENSSSCG00000010628	SHOC2	blue	-0.343828	0.228715	0.724652	0.00337106
ENSSSCG00000022719	RAB20	blue	0.343647	0.228976	-0.728732	0.00311253
ENSSSCG00000002722		blue	-0.343335	0.229427	0.850341	0.000116574
ENSSSCG00000006403	CRP	blue	-0.342775	0.230238	0.820614	0.000322966
ENSSSCG00000000160	PRDM4	blue	-0.342545	0.230572	0.824556	0.000285227
ENSSSCG00000041367		blue	-0.342364	0.230833	0.800132	0.000589261
ENSSSCG00000003601	HCRTR1	blue	0.342158	0.231133	-0.414939	0.140134
ENSSSCG00000005092	SLC38A6	blue	-0.342098	0.23122	0.857326	8.89066e-05
ENSSSCG00000000583	PYROXD1	blue	0.341764	0.231705	-0.873381	4.50443e-05
ENSSSCG00000015808	ADAM9	blue	-0.341191	0.23254	0.978252	1.45794e-09
ENSSSCG00000021414		blue	0.34061	0.233388	-0.682705	0.00713151
ENSSSCG00000040855	C5orf51	blue	-0.340259	0.233902	0.785729	0.000865067
ENSSSCG00000029567	SLC8A2	blue	0.340193	0.233998	-0.697088	0.00559123
ENSSSCG00000025293	HLTF	blue	-0.34006	0.234193	0.667068	0.00916025
ENSSSCG00000005272	NMRK1	blue	0.339963	0.234335	-0.763471	0.00148552
ENSSSCG00000004192	CCN2	blue	0.339751	0.234646	-0.69159	0.00614576
ENSSSCG00000014406	PRELID2	blue	-0.339706	0.234712	0.759912	0.0016112
ENSSSCG00000017502	PGAP3	blue	0.339485	0.235036	-0.772367	0.00120527
ENSSSCG00000039582		blue	-0.339159	0.235515	0.785171	0.00087753
ENSSSCG00000012233	SYTL5	blue	0.338835	0.235991	-0.947286	2.7636e-07
ENSSSCG00000051437		blue	-0.338745	0.236123	0.522645	0.055178
ENSSSCG00000001904	CLK3	blue	-0.338651	0.236261	0.954607	1.14505e-07
ENSSSCG00000025092	CDK4	blue	0.338526	0.236446	-0.637994	0.0140878
ENSSSCG00000037905	ITGB5	blue	0.338518	0.236458	-0.864342	6.67479e-05
ENSSSCG00000009850	TAOK3	blue	0.338505	0.236477	-0.868921	5.48857e-05
ENSSSCG00000022299	ACTR10	blue	-0.338339	0.236721	0.879167	3.44677e-05
ENSSSCG00000036191	SLC17A2	blue	-0.337435	0.238056	0.800306	0.000586421
ENSSSCG00000041235		blue	-0.33737	0.238153	0.468381	0.0911803
ENSSSCG00000013181	SERPING1	blue	0.337359	0.238168	-0.448568	0.107667
ENSSSCG00000006577	S100A5	blue	0.337094	0.23856	-0.528817	0.051863
ENSSSCG00000004897	ZCCHC2	blue	0.336884	0.238872	-0.607996	0.0210701
ENSSSCG00000040603	SGTB	blue	0.336122	0.240003	-0.660316	0.0101626
ENSSSCG00000048587		blue	0.33612	0.240005	-0.350095	0.219782
ENSSSCG00000008175	CHST10	blue	-0.335774	0.24052	0.60473	0.0219638
ENSSSCG00000044381		blue	-0.335698	0.240633	0.836565	0.0001916
ENSSSCG00000006363	UFC1	blue	-0.335427	0.241038	0.761894	0.00154021
ENSSSCG00000047453		blue	-0.335206	0.241367	0.754365	0.00182374
ENSSSCG00000045946		blue	-0.335193	0.241387	0.334304	0.242715
ENSSSCG00000031701	GXYLT1	blue	0.335162	0.241432	-0.903781	9.28475e-06
ENSSSCG00000027342	BAZ1B	blue	0.3349	0.241824	-0.919529	3.29033e-06
ENSSSCG00000011049	DCLRE1C	blue	-0.334687	0.242142	0.5792	0.0299676
ENSSSCG00000047500		blue	0.334606	0.242262	-0.523231	0.0548571
ENSSSCG00000046813		blue	-0.334577	0.242307	0.439843	0.115538
ENSSSCG00000043613		blue	-0.334466	0.242473	0.25074	0.387232
ENSSSCG00000047157		blue	-0.33415	0.242945	0.632538	0.0152028
ENSSSCG00000041459		blue	-0.334129	0.242976	0.694063	0.0058913
ENSSSCG00000008498	HEATR5B	blue	-0.334005	0.243163	0.793377	0.000708098
ENSSSCG00000016218	PTPRN	blue	0.333819	0.243441	-0.302617	0.292966
ENSSSCG00000048636		blue	-0.333659	0.243681	0.885553	2.52435e-05
ENSSSCG00000000941	METTL25	blue	-0.333416	0.244045	0.514747	0.0596395
ENSSSCG00000024431	ATG9B	blue	-0.333197	0.244375	0.883141	2.84539e-05
ENSSSCG00000044178		blue	0.332328	0.245683	-0.752829	0.00188639
ENSSSCG00000009578		blue	0.331677	0.246666	-0.63307	0.0150912
ENSSSCG00000015853	HERC2	blue	-0.331189	0.247405	0.55743	0.0383568
ENSSSCG00000046472		blue	-0.331164	0.247442	0.819965	0.000329544
ENSSSCG00000008812	ATP10D	blue	0.330963	0.247747	-0.831079	0.000230656
ENSSSCG00000012993	SLC25A45	blue	0.3308	0.247994	-0.52504	0.0538741
ENSSSCG00000050306		blue	-0.330791	0.248008	0.622772	0.0173647
ENSSSCG00000027587	SPAG1	blue	0.330678	0.248178	-0.906586	7.82372e-06
ENSSSCG00000002852	PLEKHF1	blue	-0.330377	0.248636	0.811287	0.000428434
ENSSSCG00000041654		blue	-0.330038	0.249151	0.445489	0.110401
ENSSSCG00000042759	U2	blue	-0.330038	0.249151	0.445489	0.110401
ENSSSCG00000025527		blue	-0.330038	0.249151	0.445489	0.110401
ENSSSCG00000045814	U3	blue	-0.330038	0.249151	0.445489	0.110401
ENSSSCG00000031594	NICN1	blue	-0.330035	0.249156	0.941696	4.99779e-07
ENSSSCG00000036944	TACO1	blue	-0.329155	0.250496	0.806384	0.000494073
ENSSSCG00000037251		blue	-0.32914	0.250519	0.794493	0.00068724
ENSSSCG00000006392	IGSF8	blue	0.328995	0.25074	-0.787247	0.000831891
ENSSSCG00000006561	SLC39A1	blue	0.328984	0.250757	-0.803545	0.000535626
ENSSSCG00000026078	GLCE	blue	0.328902	0.250882	-0.677395	0.00777675
ENSSSCG00000004537	TXNL1	blue	-0.328867	0.250935	0.836568	0.000191579
ENSSSCG00000027404	UNC93A	blue	0.328655	0.25126	-0.817146	0.0003594
ENSSSCG00000012400	SNX12	blue	-0.328599	0.251345	0.814881	0.00038493
ENSSSCG00000013238	SLC39A13	blue	0.328493	0.251507	-0.583909	0.0283494
ENSSSCG00000049052		blue	-0.32844	0.251588	0.656264	0.0108035
ENSSSCG00000027085	UQCRFS1	blue	-0.328262	0.251861	0.695064	0.00579065
ENSSSCG00000008186	TSGA10	blue	0.328232	0.251907	-0.86808	5.69266e-05
ENSSSCG00000051412		blue	-0.328201	0.251954	0.0799228	0.785932
ENSSSCG00000025344	PHC2	blue	0.328041	0.252199	-0.55219	0.0406106
ENSSSCG00000012006		blue	0.327964	0.252318	-0.89655	1.41124e-05
ENSSSCG00000001695	VEGFA	blue	-0.327669	0.252769	0.876537	3.89899e-05
ENSSSCG00000032063	THEM6	blue	0.327584	0.2529	-0.40986	0.145548
ENSSSCG00000035000		blue	0.327271	0.25338	-0.809658	0.000449405
ENSSSCG00000045530		blue	-0.326831	0.254057	0.726967	0.00322239
ENSSSCG00000044515		blue	-0.326831	0.254057	0.726967	0.00322239
ENSSSCG00000050903		blue	-0.326831	0.254057	0.726967	0.00322239
ENSSSCG00000042127		blue	-0.326831	0.254057	0.726967	0.00322239
ENSSSCG00000046473		blue	-0.326831	0.254057	0.726967	0.00322239
ENSSSCG00000038345	IKZF1	blue	-0.326662	0.254317	0.453663	0.103246
ENSSSCG00000040026		blue	-0.326451	0.254642	0.591762	0.025797
ENSSSCG00000021410	STRAP	blue	-0.326254	0.254946	0.792981	0.000715618
ENSSSCG00000048468		blue	-0.325635	0.255901	0.611374	0.0201747
ENSSSCG00000032715	CERS6	blue	0.325463	0.256167	-0.833171	0.000215069
ENSSSCG00000030018	ZNF396	blue	0.325263	0.256477	-0.572124	0.0325275
ENSSSCG00000011894	POPDC2	blue	0.32517	0.25662	-0.160491	0.58363
ENSSSCG00000009486	SLITRK6	blue	0.324852	0.257114	-0.913171	5.12005e-06
ENSSSCG00000001391	CCHCR1	blue	-0.324801	0.257192	0.250519	0.387665
ENSSSCG00000004151		blue	0.324728	0.257305	-0.418752	0.13616
ENSSSCG00000003013	B9D2	blue	0.324532	0.25761	-0.423014	0.131807
ENSSSCG00000016109	ALS2	blue	-0.324454	0.257731	0.947695	2.63993e-07
ENSSSCG00000009152	SGMS2	blue	0.324442	0.25775	-0.842019	0.00015826
ENSSSCG00000001826	CFAP100	blue	0.324347	0.257897	-0.796641	0.000648482
ENSSSCG00000039119	PDXDC1	blue	0.324178	0.25816	-0.94229	4.70646e-07
ENSSSCG00000041380		blue	0.323869	0.25864	-0.335345	0.241159
ENSSSCG00000044675		blue	0.323839	0.258686	-0.660682	0.0101063
ENSSSCG00000008317	TEX261	blue	0.323677	0.258938	-0.844942	0.000142429
ENSSSCG00000011928	CCDC80	blue	-0.323334	0.259473	0.656108	0.0108289
ENSSSCG00000012655	BCORL1	blue	0.323053	0.259911	-0.540549	0.0459642
ENSSSCG00000034074	ERI2	blue	0.322985	0.260017	-0.756831	0.00172666
ENSSSCG00000041187		blue	0.322517	0.260748	-0.92145	2.85848e-06
ENSSSCG00000034308	LRMDA	blue	-0.322343	0.26102	0.871463	4.90837e-05
ENSSSCG00000011522	CNTN3	blue	-0.321985	0.26158	0.597852	0.0239392
ENSSSCG00000005761	PPP1R26	blue	0.3219	0.261713	-0.799946	0.000592301
ENSSSCG00000007236	TTLL9	blue	0.321757	0.261938	-0.705497	0.00481936
ENSSSCG00000050880		blue	-0.321576	0.262221	0.755404	0.00178234
ENSSSCG00000034262	FIGN	blue	0.321534	0.262288	-0.588784	0.0267437
ENSSSCG00000035747	YIPF4	blue	-0.321506	0.262331	0.883663	2.77332e-05
ENSSSCG00000017264	AMZ2	blue	-0.321124	0.262931	0.793749	0.000701088
ENSSSCG00000030426	C9orf78	blue	-0.320728	0.263553	0.693786	0.00591933
ENSSSCG00000029168	MARF1	blue	-0.320344	0.264158	0.956205	9.2668e-08
ENSSSCG00000011181	NEK11	blue	-0.320337	0.264168	0.398457	0.158203
ENSSSCG00000029698	LRRC42	blue	-0.320267	0.264279	0.789061	0.000793575
ENSSSCG00000012252	DDX3X	blue	0.320037	0.264642	-0.746294	0.00217217
ENSSSCG00000010836	BROX	blue	-0.320029	0.264655	0.756877	0.0017249
ENSSSCG00000034779	NT5C3B	blue	-0.319898	0.26486	0.744415	0.00226039
ENSSSCG00000028804	CCDC181	blue	-0.319803	0.265012	0.529207	0.051659
ENSSSCG00000045629		blue	-0.319696	0.26518	0.856362	9.23697e-05
ENSSSCG00000037728	ANAPC16	blue	-0.319572	0.265375	0.428552	0.126293
ENSSSCG00000007881	ERCC4	blue	0.319214	0.265941	-0.72216	0.00353713
ENSSSCG00000011103	PARD3	blue	-0.319019	0.266251	0.72651	0.00325134
ENSSSCG00000001556	MAPK14	blue	-0.318956	0.26635	0.795236	0.00067362
ENSSSCG00000000633	YBX3	blue	0.318892	0.266451	-0.696534	0.00564524
ENSSSCG00000023331	UBL5	blue	-0.318663	0.266814	0.860126	7.94409e-05
ENSSSCG00000035567		blue	-0.318239	0.267487	0.46429	0.0944305
ENSSSCG00000039041	ZNF467	blue	0.318209	0.267535	-0.721814	0.00356069
ENSSSCG00000012050		blue	0.317723	0.268305	-0.851407	0.000111949
ENSSSCG00000007203		blue	-0.317707	0.268331	0.871231	4.95914e-05
ENSSSCG00000027847	CSKMT	blue	-0.317565	0.268557	0.54899	0.0420341
ENSSSCG00000029790	PCYOX1	blue	-0.317297	0.268984	0.880141	3.29054e-05
ENSSSCG00000017120	SLC6A19	blue	0.317241	0.269073	-0.773124	0.0011835
ENSSSCG00000012663	ENOX2	blue	-0.317107	0.269287	0.821143	0.000317675
ENSSSCG00000034177		blue	-0.317072	0.269342	0.911961	5.54842e-06
ENSSSCG00000001972	AP4S1	blue	-0.317008	0.269445	0.847425	0.000130017
ENSSSCG00000043561		blue	-0.316585	0.27012	0.906473	7.87868e-06
ENSSSCG00000016695	HIBADH	blue	0.316449	0.270336	-0.789208	0.000790533
ENSSSCG00000043040		blue	-0.316419	0.270385	0.806919	0.000486544
ENSSSCG00000017038	PWWP2A	blue	-0.316287	0.270596	0.354004	0.214321
ENSSSCG00000043545		blue	0.316026	0.271012	-0.778049	0.00104956
ENSSSCG00000005174	RRAGA	blue	-0.315912	0.271195	0.738109	0.00257737
ENSSSCG00000044703		blue	-0.315702	0.271532	0.530308	0.0510846
ENSSSCG00000003289	ISOC2	blue	-0.315665	0.27159	0.558919	0.0377335
ENSSSCG00000027119	COA7	blue	0.315616	0.271669	-0.693881	0.0059097
ENSSSCG00000036286	APMAP	blue	0.315412	0.271995	-0.877844	3.6686e-05
ENSSSCG00000011463	IL17RD	blue	0.315407	0.272004	-0.87319	4.54325e-05
ENSSSCG00000018042	SLC47A2	blue	0.314974	0.272699	-0.477268	0.0843915
ENSSSCG00000036379		blue	-0.314907	0.272806	0.685881	0.00676607
ENSSSCG00000035657	DIP2A	blue	0.314857	0.272886	-0.918789	3.47033e-06
ENSSSCG00000014285	SEPTIN8	blue	0.314793	0.272989	-0.49217	0.0738177
ENSSSCG00000045313		blue	0.314683	0.273166	-0.155453	0.595649
ENSSSCG00000051121		blue	0.314465	0.273517	-0.767009	0.00136845
ENSSSCG00000032337		blue	0.314439	0.273559	-0.500098	0.0685923
ENSSSCG00000007851	ZP2	blue	0.313769	0.274638	-0.896899	1.38401e-05
ENSSSCG00000010009	GAL3ST1	blue	0.313654	0.274823	-0.73077	0.00298935
ENSSSCG00000042290		blue	0.313209	0.275541	-0.546441	0.0431937
ENSSSCG00000031374		blue	0.31283	0.276154	-0.601686	0.0228222
ENSSSCG00000002859	ANKRD27	blue	0.312631	0.276475	-0.771419	0.00123295
ENSSSCG00000042386		blue	-0.312526	0.276646	0.810594	0.00043726
ENSSSCG00000034087	TNFSF15	blue	0.312078	0.277372	-0.826144	0.000271074
ENSSSCG00000019284	SNORA80E	blue	-0.312022	0.277463	0.199336	0.494471
ENSSSCG00000032870		blue	-0.311602	0.278144	0.870227	5.18399e-05
ENSSSCG00000016101	CFLAR	blue	-0.311572	0.278192	0.829934	0.000239569
ENSSSCG00000009431	DGKH	blue	-0.311282	0.278665	0.765781	0.0014082
ENSSSCG00000016943	ADAMTS6	blue	0.310834	0.279393	-0.661818	0.00993261
ENSSSCG00000016569	SMO	blue	0.310544	0.279866	-0.912217	5.45553e-06
ENSSSCG00000036880		blue	0.310445	0.280027	-0.653988	0.0111769
ENSSSCG00000016323	COPS8	blue	-0.309993	0.280765	0.683992	0.00698164
ENSSSCG00000014015		blue	-0.309787	0.281102	0.56588	0.0349179
ENSSSCG00000032693	MAPK12	blue	-0.309635	0.28135	0.718499	0.00379265
ENSSSCG00000038617	PCMTD2	blue	0.308671	0.28293	-0.841308	0.000162318
ENSSSCG00000026155	FSCN2	blue	0.308558	0.283115	-0.843278	0.000151278
ENSSSCG00000033883		blue	0.308155	0.283777	-0.516532	0.0586092
ENSSSCG00000007098	DTD1	blue	0.307854	0.284271	-0.659214	0.010334
ENSSSCG00000024045	CASTOR2	blue	-0.3078	0.284362	0.756478	0.00174031
ENSSSCG00000009942	DAO	blue	0.3075	0.284855	-0.789691	0.000780616
ENSSSCG00000031908	U6	blue	-0.307276	0.285224	0.337682	0.23769
ENSSSCG00000023757		blue	-0.307276	0.285224	0.337682	0.23769
ENSSSCG00000031474	PTK6	blue	0.307158	0.285419	-0.683888	0.00699369
ENSSSCG00000011447	SPCS1	blue	-0.30619	0.287017	0.761442	0.00155617
ENSSSCG00000045467		blue	-0.30585	0.28758	0.587549	0.0271437
ENSSSCG00000036270	ATP6V1G3	blue	0.305381	0.288358	-0.614537	0.0193629
ENSSSCG00000007836	SCNN1G	blue	-0.3051	0.288824	0.91001	6.30066e-06
ENSSSCG00000037228	RRAGB	blue	-0.305071	0.288874	0.483552	0.0798107
ENSSSCG00000043759		blue	0.304698	0.289492	-0.445342	0.110533
ENSSSCG00000031639	ZCCHC17	blue	-0.304373	0.290034	0.866815	6.01092e-05
ENSSSCG00000048245		blue	-0.30419	0.290338	0.181645	0.534276
ENSSSCG00000010017	SMTN	blue	0.304046	0.290579	-0.941343	5.17837e-07
ENSSSCG00000010224	EGR2	blue	0.304034	0.290598	-0.775919	0.00110592
ENSSSCG00000015802		blue	0.303908	0.290809	-0.660777	0.0100917
ENSSSCG00000015108	HMBS	blue	-0.303731	0.291103	0.675065	0.00807369
ENSSSCG00000041716		blue	-0.303332	0.291769	0.383343	0.176061
ENSSSCG00000006040	DPYS	blue	0.30331	0.291807	-0.274143	0.342896
ENSSSCG00000051523		blue	0.303046	0.292248	-0.715012	0.00404926
ENSSSCG00000016141	PLEKHM3	blue	0.302811	0.292641	-0.85553	9.5447e-05
ENSSSCG00000047193		blue	0.302212	0.293644	-0.639645	0.013763
ENSSSCG00000033054	ROM1	blue	0.302046	0.293923	-0.544181	0.0442418
ENSSSCG00000017919	MED11	blue	0.301612	0.294652	-0.681526	0.00727109
ENSSSCG00000017024	CCNG1	blue	-0.301421	0.294973	0.671044	0.00860673
ENSSSCG00000004730	TMEM87A	blue	-0.301332	0.295122	0.726771	0.00323476
ENSSSCG00000008020	IFT140	blue	0.301308	0.295163	-0.397859	0.158886
ENSSSCG00000008447	CAMKMT	blue	-0.301298	0.295179	0.93451	9.88073e-07
ENSSSCG00000017211	GGA3	blue	-0.301056	0.295586	0.588766	0.0267495
ENSSSCG00000026433	CCDC73	blue	-0.300862	0.295913	0.772605	0.00119838
ENSSSCG00000034782	VPS25	blue	0.300694	0.296196	-0.616685	0.0188257
ENSSSCG00000034608	TMEM94	blue	0.300227	0.296984	-0.746088	0.00218174
ENSSSCG00000042790		blue	-0.300035	0.297309	0.893784	1.64312e-05
ENSSSCG00000028492	C4orf46	blue	0.299826	0.297661	-0.820371	0.000325411
ENSSSCG00000012292	SYP	blue	-0.299663	0.297937	0.531263	0.0505907
ENSSSCG00000015196	SIAE	blue	0.299167	0.298777	-0.8634	6.94315e-05
ENSSSCG00000036814	CLEC11A	blue	0.299146	0.298811	-0.799633	0.000597437
ENSSSCG00000016105	FLACC1	blue	-0.298594	0.299748	0.492245	0.0737667
ENSSSCG00000011811	LPP	blue	0.29849	0.299924	-0.779646	0.00100881
ENSSSCG00000043689		blue	-0.298376	0.300118	0.604844	0.021932
ENSSSCG00000012054	DOP1B	blue	-0.298304	0.30024	0.915875	4.26031e-06
ENSSSCG00000015524	FAM20B	blue	0.297943	0.300853	-0.891252	1.88188e-05
ENSSSCG00000004160	PEX7	blue	-0.297911	0.300908	0.73063	0.00299773
ENSSSCG00000048407		blue	-0.297886	0.300952	0.911698	5.6452e-06
ENSSSCG00000006559		blue	-0.297713	0.301246	0.492781	0.0734051
ENSSSCG00000009612	DOK2	blue	-0.297186	0.302143	0.671505	0.00854428
ENSSSCG00000041966		blue	0.297061	0.302357	-0.732285	0.00290032
ENSSSCG00000041465		blue	0.296957	0.302534	-0.198355	0.496642
ENSSSCG00000047637		blue	0.296944	0.302557	-0.661904	0.0099196
ENSSSCG00000048580		blue	-0.296363	0.303548	0.469367	0.0904095
ENSSSCG00000049121		blue	-0.296328	0.303608	0.635604	0.0145683
ENSSSCG00000016041	ASNSD1	blue	-0.296184	0.303855	0.66494	0.00946757
ENSSSCG00000015125	NECTIN1	blue	0.296147	0.303917	-0.853024	0.00010522
ENSSSCG00000043796		blue	-0.295833	0.304455	0.662838	0.00977886
ENSSSCG00000041502		blue	0.294745	0.306321	-0.521044	0.0560621
ENSSSCG00000051760		blue	-0.294493	0.306754	0.655806	0.0108778
ENSSSCG00000051357		blue	-0.294442	0.306843	0.437846	0.117393
ENSSSCG00000051673		blue	-0.294359	0.306986	0.751209	0.00195428
ENSSSCG00000038231	ABCD4	blue	0.2942	0.307258	-0.736065	0.00268727
ENSSSCG00000027423	TMEM53	blue	0.294084	0.307459	-0.700159	0.00529889
ENSSSCG00000016090	SPATS2L	blue	0.293707	0.308108	-0.77559	0.00111483
ENSSSCG00000032444	PLXDC2	blue	0.293489	0.308485	-0.914493	4.6834e-06
ENSSSCG00000017041	ADRA1B	blue	0.293261	0.308877	-0.696701	0.00562888
ENSSSCG00000021874	UNC5C	blue	0.293135	0.309096	-0.636474	0.0143919
ENSSSCG00000022296	CDK15	blue	-0.292527	0.310147	0.935033	9.42757e-07
ENSSSCG00000022068	GNG8	blue	-0.292422	0.310328	0.314298	0.273785
ENSSSCG00000044825		blue	0.292366	0.310425	-0.647398	0.0123141
ENSSSCG00000000382	SMARCC2	blue	-0.29187	0.311285	0.666539	0.00923595
ENSSSCG00000034369	SPSB4	blue	0.291833	0.311349	-0.733779	0.00281458
ENSSSCG00000014441	CSF1R	blue	0.29137	0.312153	-0.457204	0.100248
ENSSSCG00000014892	USP35	blue	0.291288	0.312295	-0.342392	0.230794
ENSSSCG00000003155	PPP1R15A	blue	-0.29091	0.312953	0.922499	2.64303e-06
ENSSSCG00000046341		blue	-0.290824	0.313102	0.719696	0.00370753
ENSSSCG00000037237	COMTD1	blue	0.290697	0.313324	-0.458461	0.0991985
ENSSSCG00000016913	DDX4	blue	0.290352	0.313923	-0.477484	0.0842316
ENSSSCG00000013411	WEE1	blue	0.290271	0.314065	-0.825128	0.000280063
ENSSSCG00000044338		blue	-0.290036	0.314475	0.409284	0.146171
ENSSSCG00000004201	TMEM200A	blue	0.289614	0.315213	-0.333055	0.244588
ENSSSCG00000003398	UBE4B	blue	-0.28961	0.315219	0.907717	7.29054e-06
ENSSSCG00000021784	TBCK	blue	-0.289514	0.315386	0.857645	8.77861e-05
ENSSSCG00000012042	ATP5PO	blue	-0.289505	0.315402	0.835611	0.000197979
ENSSSCG00000011589	IFT122	blue	0.289305	0.315752	-0.795708	0.0006651
ENSSSCG00000007198	ANGPT4	blue	0.289275	0.315805	-0.391413	0.16637
ENSSSCG00000014272		blue	-0.289225	0.315893	0.226808	0.435532
ENSSSCG00000008270	CCDC142	blue	-0.289117	0.31608	0.620976	0.0177866
ENSSSCG00000022545	CALM3	blue	0.288908	0.316447	-0.843424	0.000150482
ENSSSCG00000038826	NDUFV2	blue	-0.288779	0.316672	0.863955	6.78397e-05
ENSSSCG00000037556	COG5	blue	-0.288754	0.316716	0.893046	1.70996e-05
ENSSSCG00000008346	APLF	blue	0.288531	0.317106	-0.810725	0.000435573
ENSSSCG00000008980	SCARB2	blue	0.288221	0.317651	-0.887522	2.2848e-05
ENSSSCG00000011023	ZNF438	blue	0.288126	0.317817	-0.846979	0.000132179
ENSSSCG00000042304	TAFA3	blue	-0.287398	0.319097	0.598164	0.0238467
ENSSSCG00000015231	DCPS	blue	0.28726	0.319339	-0.593016	0.0254057
ENSSSCG00000024088	TLN2	blue	0.287111	0.319602	-0.736207	0.00267956
ENSSSCG00000009733	GOLGA3	blue	0.286991	0.319812	-0.707686	0.0046328
ENSSSCG00000003478	CROCC	blue	0.286754	0.32023	-0.698193	0.0054846
ENSSSCG00000038044	GYG2	blue	-0.286674	0.320372	0.601266	0.0229425
ENSSSCG00000016241		blue	-0.286672	0.320374	0.569873	0.0333748
ENSSSCG00000016900	ESM1	blue	0.286659	0.320398	-0.559063	0.0376734
ENSSSCG00000039573	SLPI	blue	0.286649	0.320416	-0.722869	0.00348924
ENSSSCG00000006281	NTMT2	blue	-0.28645	0.320766	0.776199	0.00109838
ENSSSCG00000016865	FBXO4	blue	-0.285374	0.322669	0.629747	0.0157983
ENSSSCG00000004457	DOP1A	blue	-0.285268	0.322856	0.743978	0.00228129
ENSSSCG00000008214	FABP1	blue	-0.285169	0.323032	0.712234	0.00426331
ENSSSCG00000004750	OIP5	blue	-0.284503	0.324211	0.785144	0.000878125
ENSSSCG00000050172		blue	0.284338	0.324504	-0.847578	0.00012928
ENSSSCG00000039269	SHLD1	blue	-0.284322	0.324533	0.792353	0.000727675
ENSSSCG00000006553	UBAP2L	blue	-0.284024	0.325064	0.863993	6.77326e-05
ENSSSCG00000017248	COG1	blue	0.283901	0.325282	-0.763545	0.001483
ENSSSCG00000039416	CXCR4	blue	0.28382	0.325427	-0.322615	0.260595
ENSSSCG00000018864	SNORD89	blue	0.283765	0.325523	-0.70134	0.00518975
ENSSSCG00000026184	MPP4	blue	-0.282611	0.327581	0.940195	5.80252e-07
ENSSSCG00000010835	AIDA	blue	0.282336	0.328071	-0.668837	0.00891073
ENSSSCG00000008041	PKD1	blue	0.282307	0.328124	-0.69669	0.00562998
ENSSSCG00000040838	AGBL2	blue	-0.281884	0.328881	0.652118	0.0114911
ENSSSCG00000036160	ZNF250	blue	0.281673	0.329258	-0.847951	0.000127503
ENSSSCG00000038238		blue	-0.281359	0.32982	0.86203	7.34873e-05
ENSSSCG00000009713	CLCN3	blue	0.281254	0.330009	-0.836476	0.000192188
ENSSSCG00000025151		blue	0.281106	0.330274	-0.571448	0.0327802
ENSSSCG00000006760	HIPK1	blue	-0.28074	0.33093	0.417926	0.137015
ENSSSCG00000010470	IDE	blue	0.280739	0.330933	-0.847476	0.000129771
ENSSSCG00000032340	CDR2	blue	0.28063	0.331128	-0.7598	0.00161526
ENSSSCG00000001477	RING1	blue	0.280303	0.331715	-0.585396	0.0278521
ENSSSCG00000042835		blue	0.279901	0.332438	-0.586694	0.0274233
ENSSSCG00000047867		blue	-0.279581	0.333015	0.69754	0.00554738
ENSSSCG00000041317		blue	0.279464	0.333226	-0.653267	0.0112972
ENSSSCG00000042092		blue	-0.279177	0.333745	0.246444	0.395684
ENSSSCG00000001716	RCAN2	blue	-0.278859	0.334318	0.664823	0.00948467
ENSSSCG00000001207	PGBD1	blue	0.278668	0.334663	-0.573393	0.0320569
ENSSSCG00000014214	TRIM36	blue	-0.278529	0.334914	0.868262	5.6479e-05
ENSSSCG00000015270	FMOD	blue	0.278442	0.335071	-0.712793	0.00421958
ENSSSCG00000004517	CXXC1	blue	0.277945	0.33597	-0.641599	0.0133863
ENSSSCG00000025703	REV3L	blue	-0.277714	0.33639	0.321107	0.262957
ENSSSCG00000049484		blue	0.277043	0.337606	-0.543803	0.0444188
ENSSSCG00000044568		blue	0.276845	0.337966	-0.886355	2.42441e-05
ENSSSCG00000046875		blue	-0.276612	0.338389	0.463372	0.0951708
ENSSSCG00000014277	IRF1	blue	0.276233	0.339078	-0.764792	0.0014409
ENSSSCG00000015282	PPP1R15B	blue	-0.276048	0.339416	0.894482	1.58187e-05
ENSSSCG00000050844		blue	0.276018	0.339471	-0.76413	0.00146311
ENSSSCG00000008384	C2orf74	blue	-0.275895	0.339694	0.468623	0.0909907
ENSSSCG00000002741	ZNF821	blue	0.27562	0.340197	-0.754267	0.00182768
ENSSSCG00000015109	CCDC153	blue	-0.275609	0.340215	0.705309	0.00483562
ENSSSCG00000023971	H3-3A	blue	-0.275163	0.341031	0.743943	0.00228299
ENSSSCG00000002830	IRX6	blue	-0.274778	0.341734	0.490185	0.0751687
ENSSSCG00000030957	NFKB1	blue	0.274763	0.34176	-0.629801	0.0157868
ENSSSCG00000036383	LGALS3BP	blue	0.274622	0.342019	-0.572727	0.0323032
ENSSSCG00000024048	MMRN2	blue	0.274609	0.342042	-0.832508	0.000219913
ENSSSCG00000016626	CFTR	blue	0.274558	0.342136	-0.549494	0.0418075
ENSSSCG00000029189	DCHS1	blue	0.274344	0.342527	-0.547586	0.0426701
ENSSSCG00000050122		blue	0.274344	0.342528	-0.681633	0.00725837
ENSSSCG00000017676	BCAS3	blue	-0.274188	0.342812	0.812161	0.000417502
ENSSSCG00000051691		blue	0.274184	0.34282	-0.82208	0.000308485
ENSSSCG00000030294	ZNF398	blue	0.273688	0.34373	-0.852717	0.000106475
ENSSSCG00000016306	USP40	blue	0.273649	0.343801	-0.797112	0.000640219
ENSSSCG00000051477		blue	-0.273092	0.344823	0.348377	0.222208
ENSSSCG00000043973		blue	-0.273092	0.344823	0.348377	0.222208
ENSSSCG00000011260	SCN10A	blue	-0.273092	0.344823	0.348377	0.222208
ENSSSCG00000018735	MIR99B	blue	-0.273092	0.344823	0.348377	0.222208
ENSSSCG00000044794		blue	-0.273092	0.344823	0.348377	0.222208
ENSSSCG00000048637		blue	-0.273092	0.344823	0.348377	0.222208
ENSSSCG00000048372		blue	-0.273092	0.344823	0.348377	0.222208
ENSSSCG00000041170		blue	0.272612	0.345705	-0.415147	0.139916
ENSSSCG00000008568	DRC1	blue	0.272518	0.345879	-0.592092	0.0256934
ENSSSCG00000006238	CYP7A1	blue	0.271753	0.347289	-0.571929	0.0326
ENSSSCG00000011340	SMARCC1	blue	-0.271691	0.347403	0.742675	0.00234456
ENSSSCG00000040143	SNORA58B	blue	0.271345	0.348041	-0.164668	0.57374
ENSSSCG00000016107	C2CD6	blue	-0.271105	0.348485	0.900552	1.12378e-05
ENSSSCG00000004540	ONECUT2	blue	-0.271034	0.348617	0.457491	0.100008
ENSSSCG00000031170	TMEM123	blue	-0.270871	0.348918	0.843867	0.000148096
ENSSSCG00000011787	MAGEF1	blue	0.270807	0.349036	-0.807419	0.000479584
ENSSSCG00000006127	NBN	blue	-0.270723	0.349192	0.937523	7.49804e-07
ENSSSCG00000049869		blue	-0.27028	0.350012	0.496931	0.070647
ENSSSCG00000020407	U6	blue	0.270057	0.350425	-0.473932	0.0868973
ENSSSCG00000029507	RASGEF1B	blue	-0.268039	0.354177	0.872685	4.64762e-05
ENSSSCG00000029029	ZNF713	blue	-0.267705	0.3548	0.69075	0.00623412
ENSSSCG00000016459	EPHA1	blue	0.267101	0.355927	-0.883467	2.80021e-05
ENSSSCG00000039333	RFX6	blue	-0.267029	0.356063	0.674053	0.00820533
ENSSSCG00000000647	OLR1	blue	-0.267029	0.356063	0.674053	0.00820533
ENSSSCG00000028124	SNRPN	blue	-0.266641	0.356788	0.855796	9.4455e-05
ENSSSCG00000032942	DAP	blue	0.266563	0.356935	-0.799656	0.00059707
ENSSSCG00000042665		blue	0.26618	0.357652	-0.739755	0.00249144
ENSSSCG00000027538	TMEM258	blue	0.265892	0.358192	-0.214505	0.461479
ENSSSCG00000037996		blue	0.265815	0.358337	-0.497234	0.0704486
ENSSSCG00000042003		blue	0.265576	0.358785	-0.759961	0.0016094
ENSSSCG00000017261	ARSG	blue	-0.265452	0.359019	0.844258	0.000146015
ENSSSCG00000010687	INPP5F	blue	-0.265072	0.359732	0.857704	8.75784e-05
ENSSSCG00000002140	KLHL33	blue	0.264823	0.360201	-0.583449	0.0285047
ENSSSCG00000048179		blue	0.26387	0.361998	-0.746264	0.00217359
ENSSSCG00000037256		blue	-0.263857	0.362021	0.819384	0.000335523
ENSSSCG00000016892	FST	blue	0.263459	0.362773	-0.81677	0.000363536
ENSSSCG00000045574		blue	0.263254	0.36316	-0.42523	0.129581
ENSSSCG00000006861	EXTL2	blue	-0.263082	0.363486	0.944558	3.71839e-07
ENSSSCG00000045759		blue	0.263001	0.363639	-0.779545	0.00101135
ENSSSCG00000010699	ATE1	blue	0.262974	0.36369	-0.819707	0.00033219
ENSSSCG00000047349		blue	0.262799	0.364021	-0.766458	0.00138619
ENSSSCG00000038283	KLK11	blue	0.26274	0.364133	-0.711355	0.00433291
ENSSSCG00000004558	CSNK1G1	blue	0.262409	0.36476	-0.524562	0.0541323
ENSSSCG00000024312	ID4	blue	0.261867	0.365787	-0.848638	0.000124279
ENSSSCG00000017410	HCRT	blue	0.261572	0.366347	-0.360301	0.205704
ENSSSCG00000015772	AGA	blue	0.261422	0.366633	-0.795843	0.000662669
ENSSSCG00000008573	RAB10	blue	-0.261365	0.366741	0.406602	0.149093
ENSSSCG00000021393	TRMT1L	blue	-0.261129	0.36719	0.843527	0.000149922
ENSSSCG00000036022		blue	0.260763	0.367885	-0.818643	0.000343284
ENSSSCG00000022358	RAB28	blue	-0.260188	0.368982	0.776066	0.00110194
ENSSSCG00000021216	TCEANC2	blue	-0.259509	0.370278	0.646161	0.012537
ENSSSCG00000028464		blue	0.259418	0.370452	-0.713837	0.00413878
ENSSSCG00000010380	MAPK8	blue	0.259315	0.370647	-0.797145	0.000639656
ENSSSCG00000041213		blue	-0.25919	0.370887	-0.14009	0.632889
ENSSSCG00000004551	ZNF609	blue	0.259126	0.371009	-0.855859	9.42232e-05
ENSSSCG00000043622		blue	-0.259016	0.371219	0.462728	0.0956919
ENSSSCG00000004702	STRC	blue	0.258949	0.371348	-0.705714	0.00480055
ENSSSCG00000043112		blue	-0.258714	0.371797	0.579792	0.0297605
ENSSSCG00000002042	OXA1L	blue	-0.258629	0.37196	0.743367	0.00231082
ENSSSCG00000010442		blue	0.258275	0.372638	-0.82423	0.000288202
ENSSSCG00000039218	SLC38A8	blue	-0.258242	0.372701	0.605052	0.0218745
ENSSSCG00000003282		blue	-0.258242	0.372701	0.605052	0.0218745
ENSSSCG00000017053	NIPAL4	blue	0.258204	0.372775	-0.807406	0.00047976
ENSSSCG00000034937	SH3BGRL3	blue	-0.25817	0.372839	0.88388	2.74377e-05
ENSSSCG00000048286		blue	0.258089	0.372995	-0.496959	0.0706281
ENSSSCG00000046427		blue	0.258089	0.372995	-0.496959	0.0706281
ENSSSCG00000030801		blue	0.258063	0.373044	-0.408253	0.147289
ENSSSCG00000004070	SCAF8	blue	0.257428	0.374264	-0.846433	0.000134863
ENSSSCG00000006359	ADAMTS4	blue	0.257411	0.374296	-0.344605	0.227595
ENSSSCG00000043116		blue	0.25716	0.374779	-0.772466	0.00120239
ENSSSCG00000015008	C11orf65	blue	-0.257102	0.374891	0.90553	8.34984e-06
ENSSSCG00000045449		blue	-0.257065	0.374962	0.774144	0.00115472
ENSSSCG00000035214		blue	-0.255988	0.377036	0.829479	0.000243186
ENSSSCG00000037269	LANCL3	blue	0.255936	0.377136	-0.798509	0.000616221
ENSSSCG00000029553		blue	0.255887	0.37723	-0.603784	0.0222279
ENSSSCG00000037676	KAZN	blue	0.255803	0.377392	-0.715005	0.00404981
ENSSSCG00000051205	P2RX4	blue	-0.255696	0.3776	0.665258	0.00942106
ENSSSCG00000002759		blue	0.255479	0.378018	-0.559148	0.0376382
ENSSSCG00000045611		blue	-0.254562	0.379793	0.384241	0.174964
ENSSSCG00000014998	AASDHPPT	blue	0.254145	0.3806	-0.735026	0.0027446
ENSSSCG00000035355	F2R	blue	0.253783	0.381302	-0.858633	8.438e-05
ENSSSCG00000049091		blue	-0.2533	0.38224	0.289154	0.316017
ENSSSCG00000045860		blue	-0.253011	0.382802	0.514271	0.0599167
ENSSSCG00000049442		blue	-0.252405	0.38398	0.665907	0.0093269
ENSSSCG00000008712	PPP2R2C	blue	-0.251817	0.385127	0.479651	0.0826332
ENSSSCG00000003950	TIE1	blue	0.251663	0.385428	-0.633671	0.0149659
ENSSSCG00000027249	SLC25A2	blue	0.25131	0.386117	-0.537802	0.0472994
ENSSSCG00000017948	EFNB3	blue	0.251308	0.386122	-0.810792	0.000434717
ENSSSCG00000017052	ADAM19	blue	0.251235	0.386264	-0.78833	0.000808845
ENSSSCG00000023936	MYRFL	blue	0.25049	0.387722	-0.696001	0.00569757
ENSSSCG00000008887	NAF1	blue	0.250306	0.388081	-0.426499	0.128318
ENSSSCG00000019341	ssc-mir-125a	blue	0.249566	0.389532	-0.482634	0.0804691
ENSSSCG00000047289		blue	0.249147	0.390356	-0.652382	0.0114462
ENSSSCG00000047681		blue	-0.248781	0.391074	0.423523	0.131294
ENSSSCG00000050081		blue	0.248588	0.391454	-0.0499749	0.865278
ENSSSCG00000036136	BHLHE40	blue	-0.24838	0.391863	0.856093	9.33571e-05
ENSSSCG00000040528	TTC1	blue	-0.248027	0.392559	0.765128	0.00142973
ENSSSCG00000047160		blue	-0.247972	0.392668	0.47255	0.0879498
ENSSSCG00000023048	Metazoa_SRP	blue	-0.247889	0.392832	0.860944	7.68378e-05
ENSSSCG00000004057	SYTL3	blue	0.24786	0.392888	-0.561178	0.0368017
ENSSSCG00000006018	TRPS1	blue	-0.247515	0.393569	0.679136	0.00756038
ENSSSCG00000048143		blue	-0.247082	0.394424	0.584761	0.0280637
ENSSSCG00000045989		blue	-0.246851	0.39488	0.31531	0.272159
ENSSSCG00000046528		blue	-0.246828	0.394925	0.85095	0.000113912
ENSSSCG00000013416	MED16	blue	0.246787	0.395007	-0.500555	0.0682991
ENSSSCG00000042816		blue	-0.246505	0.395564	0.721609	0.0035747
ENSSSCG00000006493	BGLAP	blue	0.246288	0.395995	-0.729735	0.00305143
ENSSSCG00000050015		blue	0.246255	0.39606	-0.792596	0.000722987
ENSSSCG00000010351	CCSER2	blue	0.246024	0.396516	-0.813825	0.000397328
ENSSSCG00000005856	RNF224	blue	0.245938	0.396687	-0.351891	0.217262
ENSSSCG00000005916		blue	0.245878	0.396807	-0.78434	0.000896354
ENSSSCG00000024481	PDE4DIP	blue	-0.245819	0.396924	0.653037	0.0113358
ENSSSCG00000010799	COG7	blue	-0.245642	0.397274	0.838482	0.000179288
ENSSSCG00000006702	FMO5	blue	0.245031	0.398486	-0.661357	0.0100029
ENSSSCG00000041189		blue	0.24466	0.399225	-0.614981	0.0192508
ENSSSCG00000041873		blue	-0.243641	0.401253	0.633598	0.014981
ENSSSCG00000022915	DDX27	blue	-0.242902	0.402728	0.645032	0.0127432
ENSSSCG00000035594	PRSS22	blue	0.242041	0.40445	-0.696287	0.00566946
ENSSSCG00000045114		blue	0.242039	0.404452	-0.620802	0.0178278
ENSSSCG00000038086	ECHS1	blue	-0.241674	0.405184	0.78878	0.000799427
ENSSSCG00000033303	MBD4	blue	-0.241584	0.405365	0.604373	0.0220631
ENSSSCG00000043086		blue	0.241523	0.405485	-0.497157	0.0704985
ENSSSCG00000048761		blue	0.241311	0.405911	-0.525605	0.0535699
ENSSSCG00000050706		blue	-0.241279	0.405975	0.573889	0.0318741
ENSSSCG00000043148		blue	-0.241279	0.405975	0.573889	0.0318741
ENSSSCG00000049613		blue	-0.241279	0.405975	0.573889	0.0318741
ENSSSCG00000031207	PLAC1	blue	-0.241279	0.405975	0.573889	0.0318741
ENSSSCG00000015083		blue	0.241123	0.406288	-0.765472	0.00141835
ENSSSCG00000048794		blue	-0.24097	0.406596	0.40855	0.146967
ENSSSCG00000025652	CDH1	blue	0.24031	0.40792	-0.877304	3.76241e-05
ENSSSCG00000040140	CD3E	blue	-0.240195	0.408153	0.303566	0.29138
ENSSSCG00000009802	CFAP251	blue	-0.240061	0.408422	0.680781	0.00736032
ENSSSCG00000039201	RAB5IF	blue	-0.239245	0.410067	0.773056	0.00118545
ENSSSCG00000013591	TIMM44	blue	-0.239066	0.410427	0.724419	0.00338632
ENSSSCG00000046960		blue	0.238212	0.412151	-0.781746	0.000957175
ENSSSCG00000002370	AREL1	blue	0.238041	0.412497	-0.77854	0.00103688
ENSSSCG00000037354	MMACHC	blue	-0.237296	0.414005	0.791751	0.000739384
ENSSSCG00000047344		blue	-0.237228	0.414142	0.888615	2.16011e-05
ENSSSCG00000011622	KBTBD12	blue	0.237172	0.414256	-0.751257	0.00195223
ENSSSCG00000029656	NDP	blue	0.236955	0.414695	-0.546101	0.0433502
ENSSSCG00000048939		blue	0.236894	0.414819	-0.674118	0.00819691
ENSSSCG00000049854		blue	0.236738	0.415136	-0.309264	0.281958
ENSSSCG00000027701	RP2	blue	0.23634	0.415945	-0.771851	0.00122027
ENSSSCG00000043153		blue	-0.236271	0.416083	0.856044	9.35372e-05
ENSSSCG00000035269	NXNL2	blue	0.23577	0.417101	-0.685069	0.00685805
ENSSSCG00000031461	ZKSCAN1	blue	0.235684	0.417277	-0.813214	0.000404639
ENSSSCG00000044894		blue	-0.235566	0.417517	0.345178	0.226772
ENSSSCG00000030996	XBP1	blue	0.235527	0.417596	-0.774732	0.00113837
ENSSSCG00000025221	PAXIP1	blue	0.235199	0.418264	-0.642643	0.0131881
ENSSSCG00000016572	TNPO3	blue	-0.234935	0.418803	0.787519	0.000826047
ENSSSCG00000048769		blue	0.234846	0.418984	-0.79307	0.000713913
ENSSSCG00000031616	FOSB	blue	-0.234507	0.419674	0.602518	0.022585
ENSSSCG00000002367	ISCA2	blue	0.234414	0.419865	-0.692268	0.00607521
ENSSSCG00000016574	KCP	blue	0.23362	0.421487	-0.728372	0.00313471
ENSSSCG00000035673	HBP1	blue	-0.233603	0.421521	0.8916	1.84749e-05
ENSSSCG00000022206	UOX	blue	-0.233216	0.422313	0.89854	1.26158e-05
ENSSSCG00000017535	HOXB4	blue	0.233195	0.422356	-0.20399	0.484234
ENSSSCG00000038904	FRAT2	blue	0.233145	0.422459	-0.776909	0.00107942
ENSSSCG00000009648		blue	-0.232859	0.423045	0.53098	0.0507367
ENSSSCG00000048185		blue	-0.232848	0.423067	0.248053	0.392507
ENSSSCG00000001895	CPLX3	blue	0.232829	0.423104	-0.62996	0.0157524
ENSSSCG00000004966	NOX5	blue	0.232764	0.423239	-0.727826	0.00316858
ENSSSCG00000009035	SLC10A7	blue	-0.232639	0.423495	0.481018	0.0816362
ENSSSCG00000000220	POU6F1	blue	0.232423	0.423938	-0.815171	0.000381588
ENSSSCG00000039780	RTN4RL1	blue	0.231967	0.424873	-0.645519	0.0126539
ENSSSCG00000001950	PSMA6	blue	-0.231685	0.425453	0.751638	0.00193612
ENSSSCG00000034816	METTL4	blue	-0.231318	0.426206	0.82818	0.000253759
ENSSSCG00000041442		blue	0.231298	0.426249	-0.676004	0.00795292
ENSSSCG00000044022		blue	-0.230854	0.42716	0.795481	0.00066919
ENSSSCG00000037389		blue	-0.229351	0.430262	0.613348	0.019665
ENSSSCG00000050035		blue	-0.229262	0.430444	0.385148	0.173862
ENSSSCG00000038821		blue	-0.2291	0.430779	0.452693	0.104078
ENSSSCG00000007623	BUD31	blue	-0.229084	0.430812	0.875328	4.12239e-05
ENSSSCG00000046398		blue	0.228987	0.431012	-0.41214	0.143101
ENSSSCG00000048195		blue	0.228987	0.431012	-0.41214	0.143101
ENSSSCG00000034785		blue	0.227883	0.4333	-0.533582	0.0494046
ENSSSCG00000007850	ANKS4B	blue	0.227704	0.433672	-0.714836	0.00406257
ENSSSCG00000040180	TMEM64	blue	-0.227415	0.43427	0.488746	0.076159
ENSSSCG00000006383	VANGL2	blue	0.227411	0.43428	-0.804649	0.000519143
ENSSSCG00000013906		blue	-0.226368	0.436446	0.738937	0.00253384
ENSSSCG00000005944	NDRG1	blue	-0.226199	0.436799	0.880233	3.27611e-05
ENSSSCG00000048073		blue	-0.22513	0.439026	0.755739	0.00176916
ENSSSCG00000004013	SMOC2	blue	0.225102	0.439086	-0.787146	0.000834066
ENSSSCG00000045027		blue	-0.224919	0.439467	0.255233	0.378494
ENSSSCG00000010054	ADORA2A	blue	0.224872	0.439566	-0.300729	0.296138
ENSSSCG00000043786		blue	-0.224871	0.439567	0.590546	0.0261803
ENSSSCG00000034951		blue	-0.224739	0.439842	0.532392	0.0500109
ENSSSCG00000049234		blue	-0.224685	0.439956	0.446943	0.109104
ENSSSCG00000044804		blue	-0.22456	0.440217	0.378738	0.181749
ENSSSCG00000014252	PRRC1	blue	0.224435	0.440478	-0.583435	0.0285093
ENSSSCG00000035394		blue	-0.22388	0.441639	0.498541	0.0695966
ENSSSCG00000022679	COCH	blue	-0.223419	0.442606	0.618649	0.0183445
ENSSSCG00000007901	CIITA	blue	-0.222788	0.443928	0.808733	0.000461683
ENSSSCG00000021158	MCF2L	blue	0.222365	0.444816	-0.805353	0.00050885
ENSSSCG00000040682	MAPK3	blue	-0.221532	0.446569	0.737817	0.00259282
ENSSSCG00000049127		blue	-0.221505	0.446625	0.66326	0.00971563
ENSSSCG00000039030		blue	-0.221501	0.446634	0.871729	4.85055e-05
ENSSSCG00000038806	AXL	blue	0.220928	0.447841	-0.817515	0.000355372
ENSSSCG00000012971	EFEMP2	blue	0.220458	0.448831	-0.449056	0.107238
ENSSSCG00000036867	C11orf71	blue	0.22	0.449799	-0.394468	0.162795
ENSSSCG00000048596		blue	0.219402	0.451062	-0.311006	0.279113
ENSSSCG00000011330	NBEAL2	blue	0.219197	0.451497	-0.795876	0.000662075
ENSSSCG00000005361	ALDH1B1	blue	-0.219114	0.451672	0.7705	0.00126026
ENSSSCG00000006519	CLK2	blue	-0.219068	0.45177	0.682441	0.00716261
ENSSSCG00000000106	KCNJ4	blue	0.218942	0.452037	-0.544866	0.0439223
ENSSSCG00000013354	CSRP3	blue	0.218907	0.45211	-0.306009	0.287318
ENSSSCG00000039008		blue	-0.218607	0.452746	0.845737	0.000138357
ENSSSCG00000003600	TINAGL1	blue	0.218163	0.453687	-0.77642	0.00109245
ENSSSCG00000006195	PRDM14	blue	-0.218135	0.453747	0.638163	0.0140544
ENSSSCG00000016412	LMBR1	blue	0.218114	0.45379	-0.732065	0.00291313
ENSSSCG00000015627	ZPBP	blue	-0.217404	0.455299	0.448362	0.107849
ENSSSCG00000047352		blue	0.217308	0.455502	-0.305404	0.28832
ENSSSCG00000013084	TMEM216	blue	-0.217125	0.455892	0.546835	0.043013
ENSSSCG00000009774	MTRFR	blue	-0.216934	0.456297	0.519738	0.0567914
ENSSSCG00000051104		blue	-0.216514	0.457192	0.557042	0.0385203
ENSSSCG00000000653	CD69	blue	0.21615	0.457967	-0.659308	0.0103193
ENSSSCG00000000078	TNRC6B	blue	-0.215825	0.458659	0.859914	8.01281e-05
ENSSSCG00000010058		blue	-0.215748	0.458824	0.711985	0.00428298
ENSSSCG00000009808	TMEM120B	blue	0.215707	0.458912	-0.632169	0.0152805
ENSSSCG00000003214	KCNC3	blue	0.215287	0.459807	-0.6136	0.0196006
ENSSSCG00000007780	ZNF629	blue	0.215151	0.460099	-0.678134	0.00768435
ENSSSCG00000024064	RNF6	blue	0.215094	0.46022	-0.799168	0.00060516
ENSSSCG00000050311		blue	-0.214665	0.461137	0.683705	0.0070149
ENSSSCG00000017378	DHX8	blue	-0.214122	0.4623	0.512198	0.0611334
ENSSSCG00000045093		blue	0.213866	0.462846	-0.487181	0.0772464
ENSSSCG00000035524	WNT9B	blue	-0.213567	0.463487	0.569548	0.0334983
ENSSSCG00000026169	MFSD12	blue	0.213293	0.464075	-0.888544	2.16801e-05
ENSSSCG00000040334	CBX6	blue	0.213264	0.464138	-0.629558	0.0158393
ENSSSCG00000018015	DNAH9	blue	0.212215	0.466389	-0.557992	0.0381204
ENSSSCG00000003509	SH2D5	blue	-0.212026	0.466797	-0.418857	0.136052
ENSSSCG00000044153		blue	0.211019	0.468964	-0.252294	0.384197
ENSSSCG00000015790	SLC25A4	blue	0.210357	0.470392	-0.589219	0.0266039
ENSSSCG00000007899		blue	-0.210042	0.471073	0.661276	0.0100152
ENSSSCG00000003401	KIF1B	blue	-0.209994	0.471177	0.813	0.000407233
ENSSSCG00000022149	RMI2	blue	-0.209414	0.472431	0.826134	0.000271156
ENSSSCG00000042317	C4orf51	blue	0.209233	0.472823	-0.464098	0.0945847
ENSSSCG00000032106	SURF6	blue	-0.209163	0.472973	0.590441	0.0262136
ENSSSCG00000047555		blue	-0.209033	0.473255	0.505891	0.0649445
ENSSSCG00000023277	NDUFA1	blue	-0.208823	0.473709	0.496413	0.0709871
ENSSSCG00000013232	MTCH2	blue	-0.208644	0.474098	0.764019	0.00146689
ENSSSCG00000042160		blue	0.207941	0.475623	-0.399408	0.157121
ENSSSCG00000018014	ZNF18	blue	-0.207814	0.475897	0.594651	0.0249026
ENSSSCG00000016826	RAD1	blue	0.207535	0.476504	-0.448545	0.107688
ENSSSCG00000014949		blue	-0.207475	0.476634	0.668716	0.00892751
ENSSSCG00000050102		blue	0.207343	0.476921	-0.364446	0.200154
ENSSSCG00000012548	PWWP3B	blue	-0.207197	0.477237	0.55834	0.0379747
ENSSSCG00000045258		blue	-0.206932	0.477816	0.796331	0.000653965
ENSSSCG00000010941	ERCC6L2	blue	-0.206567	0.47861	0.900214	1.14603e-05
ENSSSCG00000016945	PPWD1	blue	-0.206422	0.478924	0.756299	0.00174725
ENSSSCG00000017565	SPATA20	blue	0.206151	0.479515	-0.766421	0.00138737
ENSSSCG00000023276	ZNF24	blue	0.206143	0.479532	-0.744464	0.00225807
ENSSSCG00000007592	EIF2AK1	blue	0.20601	0.479823	-0.576298	0.0309987
ENSSSCG00000017077		blue	-0.205844	0.480184	0.742494	0.00235346
ENSSSCG00000009341		blue	-0.205581	0.480757	0.834579	0.000205066
ENSSSCG00000014247	ALDH7A1	blue	-0.205169	0.481656	0.678639	0.00762163
ENSSSCG00000030560	IGF1R	blue	0.20472	0.482638	-0.803325	0.000538957
ENSSSCG00000033177	CDC26	blue	-0.204246	0.483674	0.869182	5.42665e-05
ENSSSCG00000045565		blue	-0.204089	0.484018	0.54916	0.0419574
ENSSSCG00000003577	WASF2	blue	0.203913	0.484402	-0.854082	0.000101001
ENSSSCG00000032198	SPOPL	blue	-0.203793	0.484664	0.848384	0.000125462
ENSSSCG00000022447	F3	blue	0.20362	0.485044	-0.808736	0.000461645
ENSSSCG00000039973	TAS1R2	blue	0.203599	0.48509	-0.391656	0.166084
ENSSSCG00000045200		blue	0.203579	0.485135	-0.554221	0.0397256
ENSSSCG00000024161		blue	-0.202563	0.487362	0.312706	0.276354
ENSSSCG00000044343	ZNF830	blue	-0.202496	0.487509	0.513591	0.0603137
ENSSSCG00000014228	FAM170A	blue	-0.202295	0.48795	0.639605	0.0137708
ENSSSCG00000041397		blue	-0.202253	0.488042	0.608068	0.0210505
ENSSSCG00000011930	ATG3	blue	-0.201353	0.490021	0.667548	0.00909201
ENSSSCG00000048193		blue	0.200792	0.491257	-0.870711	5.07459e-05
ENSSSCG00000009925	GIT2	blue	0.200636	0.491601	-0.890116	1.99793e-05
ENSSSCG00000011065	MASTL	blue	-0.20062	0.491636	0.783304	0.000920268
ENSSSCG00000017061		blue	-0.200181	0.492605	-0.25632	0.376395
ENSSSCG00000043520		blue	-0.200035	0.492927	0.870608	5.09754e-05
ENSSSCG00000004543	MTFMT	blue	-0.199987	0.493033	-0.606896	0.0213679
ENSSSCG00000001531	SNRPC	blue	-0.199907	0.49321	0.815814	0.000374243
ENSSSCG00000011455	CACNA1D	blue	0.199869	0.493293	-0.732105	0.00291078
ENSSSCG00000038594		blue	0.199754	0.493547	-0.799271	0.00060345
ENSSSCG00000024341	USP20	blue	0.199694	0.493679	-0.428016	0.126819
ENSSSCG00000044631		blue	0.199601	0.493884	-0.37863	0.181885
ENSSSCG00000002530	CINP	blue	-0.198815	0.495623	0.75997	0.00160908
ENSSSCG00000000145		blue	0.198736	0.495798	-0.649086	0.0120147
ENSSSCG00000048434		blue	0.198395	0.496552	-0.793555	0.00070474
ENSSSCG00000004625	LEO1	blue	-0.198093	0.497221	0.726907	0.0032262
ENSSSCG00000028109	SNTB2	blue	0.197797	0.497878	-0.838603	0.000178538
ENSSSCG00000019629	SNORA5C	blue	-0.197743	0.497997	0.421123	0.133727
ENSSSCG00000033363		blue	0.197712	0.498065	-0.679537	0.00751119
ENSSSCG00000042016		blue	-0.197613	0.498284	0.307822	0.284324
ENSSSCG00000036791	KRT78	blue	0.196703	0.500306	-0.625644	0.0167061
ENSSSCG00000049726		blue	-0.196449	0.500871	0.44293	0.11271
ENSSSCG00000039060	RASSF3	blue	-0.196351	0.501089	0.790924	0.000755718
ENSSSCG00000038041	FYB2	blue	-0.195655	0.502638	0.716622	0.00392912
ENSSSCG00000007349	ACTR5	blue	-0.195628	0.502697	-0.548818	0.0421115
ENSSSCG00000012818	F8	blue	-0.195493	0.502998	0.610162	0.0204926
ENSSSCG00000038148	PROKR1	blue	-0.194823	0.504492	0.491349	0.074374
ENSSSCG00000022080	RHOA	blue	-0.194655	0.504866	0.823802	0.000292155
ENSSSCG00000008412	PSME4	blue	0.194443	0.50534	-0.831822	0.000225021
ENSSSCG00000048603		blue	-0.194169	0.505953	0.546837	0.0430121
ENSSSCG00000000130	CYTH4	blue	0.194107	0.506091	-0.607199	0.0212855
ENSSSCG00000033629	KLHL10	blue	0.194026	0.50627	-0.376546	0.184499
ENSSSCG00000001090	ALDH5A1	blue	-0.193971	0.506395	0.694975	0.00579948
ENSSSCG00000001734		blue	0.193949	0.506444	-0.649562	0.0119313
ENSSSCG00000047133		blue	-0.193468	0.507518	-0.331104	0.247533
ENSSSCG00000048439	RALA	blue	-0.193347	0.50779	0.735876	0.00269765
ENSSSCG00000035388	C16orf46	blue	0.193192	0.508137	-0.596048	0.0244786
ENSSSCG00000042321		blue	-0.193111	0.508317	0.90818	7.08089e-06
ENSSSCG00000003687	EPB41L3	blue	-0.192564	0.509543	0.796141	0.000657344
ENSSSCG00000015395	GRM3	blue	0.192484	0.509723	-0.812091	0.000418369
ENSSSCG00000043854		blue	-0.192247	0.510254	0.510926	0.0618885
ENSSSCG00000047141		blue	-0.192006	0.510794	0.789709	0.000780245
ENSSSCG00000012134	PIGA	blue	0.192006	0.510794	-0.802075	0.000558225
ENSSSCG00000017206	GRB2	blue	-0.191632	0.511633	0.81567	0.000375872
ENSSSCG00000046712		blue	0.191456	0.512029	-0.679168	0.00755651
ENSSSCG00000013061	EML3	blue	0.190867	0.513351	-0.625015	0.0168488
ENSSSCG00000042603		blue	-0.190507	0.514161	0.444823	0.110999
ENSSSCG00000037112		blue	0.190358	0.514497	-0.683874	0.00699531
ENSSSCG00000014048	HK3	blue	0.190192	0.514871	-0.545897	0.0434442
ENSSSCG00000049983		blue	-0.190017	0.515265	0.78989	0.000776549
ENSSSCG00000017177		blue	0.189876	0.515583	-0.765704	0.00141076
ENSSSCG00000047592		blue	-0.189779	0.515801	0.337012	0.238683
[truncated: 490 more rows]

## Sheet: Module Turquoise
Ensemble ID	Gene name	Module color	GS	GS p-value	MM	MM p-value
ENSSSCG00000009555	LAMP1	turquoise	0.825849	0.000273656	-0.599887	0.0233412
ENSSSCG00000021890	GNB1	turquoise	0.792511	0.000724633	-0.609341	0.0207099
ENSSSCG00000032481	DPM2	turquoise	0.789703	0.00078036	-0.436019	0.119107
ENSSSCG00000007435	PLTP	turquoise	0.778079	0.00104876	-0.622339	0.0174659
ENSSSCG00000022739	DSG2	turquoise	-0.763863	0.00147216	0.4602	0.0977591
ENSSSCG00000033636	AFMID	turquoise	-0.751736	0.00193199	0.490984	0.0746229
ENSSSCG00000003410	MASP2	turquoise	-0.747311	0.00212557	0.459697	0.0981736
ENSSSCG00000001073	TPMT	turquoise	-0.744916	0.00223659	0.5244	0.0542204
ENSSSCG00000008166	CREG2	turquoise	-0.733687	0.00281985	0.466427	0.0927229
ENSSSCG00000012955	RAB1B	turquoise	0.733445	0.00283359	-0.479175	0.0829825
ENSSSCG00000034427	MEX3C	turquoise	-0.732668	0.0028782	0.613701	0.0195751
ENSSSCG00000033991	DPP7	turquoise	0.725518	0.00331482	-0.494201	0.0724528
ENSSSCG00000015322	TFPI2	turquoise	-0.720409	0.00365759	0.61976	0.0180766
ENSSSCG00000006135	CPNE3	turquoise	-0.720217	0.00367101	0.37938	0.180949
ENSSSCG00000023097	ZNF408	turquoise	0.719736	0.0037047	-0.380308	0.179797
ENSSSCG00000049310		turquoise	-0.716762	0.00391887	0.555311	0.0392566
ENSSSCG00000005504	BRINP1	turquoise	-0.716762	0.00391887	0.555311	0.0392566
ENSSSCG00000018698	ssc-mir-221	turquoise	-0.716762	0.00391887	0.555311	0.0392566
ENSSSCG00000009142	SEC24B	turquoise	-0.694223	0.00587511	0.810292	0.000441145
ENSSSCG00000038713	CRIP2	turquoise	0.694194	0.00587803	-0.739768	0.00249076
ENSSSCG00000006033	EIF3E	turquoise	-0.692593	0.00604153	0.606691	0.0214238
ENSSSCG00000001056	RANBP9	turquoise	-0.686172	0.00673327	0.339397	0.235165
ENSSSCG00000013444	BTBD2	turquoise	0.684087	0.00697063	-0.562892	0.0361065
ENSSSCG00000050456		turquoise	0.683077	0.00708801	-0.36665	0.197242
ENSSSCG00000016184		turquoise	-0.68253	0.00715212	0.846384	0.000135107
ENSSSCG00000025078	ZNF358	turquoise	0.674506	0.00814619	-0.649107	0.012011
ENSSSCG00000035098	MED4	turquoise	-0.673011	0.00834269	0.718216	0.00381297
ENSSSCG00000027476		turquoise	-0.665688	0.00935869	0.65258	0.0114129
ENSSSCG00000001787	IL16	turquoise	0.664454	0.00953878	-0.693484	0.00595015
ENSSSCG00000010980	C9orf24	turquoise	0.659861	0.0102332	-0.603884	0.0221999
ENSSSCG00000016758	STK17A	turquoise	-0.656782	0.0107199	0.627895	0.0162035
ENSSSCG00000008961	MTHFD2L	turquoise	-0.650587	0.0117532	0.374283	0.187365
ENSSSCG00000014769		turquoise	-0.644518	0.012838	0.581579	0.0291416
ENSSSCG00000009186	METAP1	turquoise	-0.641237	0.0134554	0.826409	0.00026877
ENSSSCG00000011952	RPL24	turquoise	-0.640382	0.0136201	0.793097	0.000713396
ENSSSCG00000032796	GRINA	turquoise	0.639305	0.0138296	-0.870097	5.21356e-05
ENSSSCG00000007646	LAMTOR4	turquoise	0.63576	0.0145365	-0.363721	0.201119
ENSSSCG00000048513		turquoise	0.634733	0.0147463	-0.628297	0.0161149
ENSSSCG00000013041	FERMT3	turquoise	0.63302	0.0151017	-0.617857	0.0185374
ENSSSCG00000022506	COL6A1	turquoise	0.626829	0.0164401	-0.566884	0.0345251
ENSSSCG00000010554	SCD	turquoise	-0.625866	0.0166561	0.534682	0.0488497
ENSSSCG00000005650	CERCAM	turquoise	-0.620456	0.0179102	0.321023	0.263089
ENSSSCG00000004945	RPL4	turquoise	-0.61764	0.0185906	0.8638	6.82814e-05
ENSSSCG00000038872	GMEB1	turquoise	-0.616853	0.0187841	0.69218	0.00608433
ENSSSCG00000019364	ssc-let-7d	turquoise	0.615233	0.0191875	-0.333322	0.244187
ENSSSCG00000016832	IL7R	turquoise	-0.61439	0.0193999	0.499848	0.0687527
ENSSSCG00000017490	GSDMA	turquoise	0.612639	0.019847	-0.552865	0.0403149
ENSSSCG00000012669		turquoise	0.611804	0.0200629	-0.571351	0.0328164
ENSSSCG00000037843	TMEM138	turquoise	0.607026	0.0213326	-0.639291	0.0138322
ENSSSCG00000041723		turquoise	0.606253	0.0215436	-0.680911	0.00734467
ENSSSCG00000046461		turquoise	-0.60535	0.021792	0.359398	0.206927
ENSSSCG00000006742	MAB21L3	turquoise	-0.60256	0.0225732	0.603283	0.0223687
ENSSSCG00000022616	DCP1A	turquoise	-0.601661	0.0228293	0.495258	0.0717495
ENSSSCG00000010911	ZNF281	turquoise	-0.60053	0.0231547	0.652875	0.0113631
ENSSSCG00000038185	EREG	turquoise	-0.600432	0.0231832	0.885928	2.47723e-05
ENSSSCG00000017732	ZNF207	turquoise	-0.599929	0.023329	0.732566	0.00288407
ENSSSCG00000022963	UNKL	turquoise	0.598683	0.0236935	-0.823003	0.000299647
ENSSSCG00000037398	NTAN1	turquoise	-0.597388	0.024077	0.843721	0.000148876
ENSSSCG00000026317	SLC10A2	turquoise	-0.596358	0.0243851	0.825092	0.00028038
ENSSSCG00000007590	PMS2	turquoise	-0.59635	0.0243875	0.296013	0.304147
ENSSSCG00000037567		turquoise	0.595067	0.0247757	-0.867059	5.94836e-05
ENSSSCG00000049289		turquoise	-0.594803	0.0248563	0.440105	0.115296
ENSSSCG00000018352	SNORD101	turquoise	-0.594063	0.0250826	0.322143	0.261333
ENSSSCG00000049112		turquoise	-0.5935	0.0252559	0.518826	0.057304
ENSSSCG00000005487	COL27A1	turquoise	-0.592463	0.0255777	0.879714	3.35825e-05
ENSSSCG00000007585	ACTB	turquoise	0.591295	0.0259435	-0.660006	0.0102106
ENSSSCG00000016395	RIF1	turquoise	-0.590456	0.0262088	0.371308	0.191177
ENSSSCG00000009960	HPS4	turquoise	0.588977	0.0266814	-0.782809	0.000931857
ENSSSCG00000043674		turquoise	0.588813	0.0267344	-0.414079	0.141042
ENSSSCG00000015350	THSD7A	turquoise	-0.58842	0.0268612	0.606273	0.0215381
ENSSSCG00000004820	LINS1	turquoise	-0.587492	0.0271623	0.88347	2.79971e-05
ENSSSCG00000036059	HSPB3	turquoise	-0.586837	0.0273765	0.796214	0.000656043
ENSSSCG00000039798	SLC11A1	turquoise	-0.585531	0.0278074	0.617367	0.0186576
ENSSSCG00000008493	CEBPZ	turquoise	-0.583874	0.0283612	0.837596	0.000184895
ENSSSCG00000038602		turquoise	0.58371	0.0284163	-0.555032	0.0393763
ENSSSCG00000013497	ANKRD24	turquoise	0.582984	0.0286619	-0.740516	0.0024525
ENSSSCG00000014628	APBB1	turquoise	0.581504	0.0291674	-0.84463	0.000144055
ENSSSCG00000003108	NPAS1	turquoise	0.581246	0.0292562	-0.821985	0.000309407
ENSSSCG00000051192		turquoise	-0.580995	0.0293427	0.746763	0.00215061
ENSSSCG00000007133	ACSS1	turquoise	0.580764	0.0294228	-0.731696	0.00293472
ENSSSCG00000044047		turquoise	-0.580295	0.0295855	0.475901	0.085412
ENSSSCG00000028670		turquoise	-0.5782	0.0303198	0.537535	0.0474305
ENSSSCG00000032111	RPL7	turquoise	-0.577523	0.0305602	0.899617	1.18616e-05
ENSSSCG00000009303		turquoise	-0.576893	0.0307851	0.85295	0.000105523
ENSSSCG00000006081		turquoise	-0.576675	0.0308634	0.706522	0.0047313
ENSSSCG00000014625	TRIM3	turquoise	0.576604	0.0308886	-0.766192	0.0013948
ENSSSCG00000012913	PPP1CA	turquoise	0.574546	0.0316337	-0.67908	0.00756726
ENSSSCG00000023662	CHST3	turquoise	-0.574482	0.0316569	0.487105	0.0772996
ENSSSCG00000014399	ARHGAP26	turquoise	0.573344	0.032075	-0.722895	0.0034875
ENSSSCG00000002996		turquoise	0.572538	0.0323734	-0.623472	0.0172025
ENSSSCG00000030610	FNBP4	turquoise	-0.572395	0.0324264	0.890556	1.95226e-05
ENSSSCG00000015288	RBBP5	turquoise	-0.572275	0.0324709	0.559354	0.0375524
ENSSSCG00000015097	DDX6	turquoise	-0.572166	0.0325119	0.790752	0.000759149
ENSSSCG00000032171	TCF20	turquoise	-0.571985	0.0325793	0.590784	0.0261051
ENSSSCG00000038627	ADAMTS18	turquoise	-0.571952	0.0325917	0.621064	0.0177657
ENSSSCG00000014336	EGR1	turquoise	0.571893	0.0326135	-0.817655	0.000353856
ENSSSCG00000004071	CNKSR3	turquoise	0.571643	0.0327071	-0.86872	5.5369e-05
ENSSSCG00000006168	PEX2	turquoise	-0.571332	0.0328236	0.830655	0.000233925
ENSSSCG00000037032	DNASE1L1	turquoise	0.570976	0.0329576	-0.731308	0.00295752
ENSSSCG00000041429		turquoise	-0.568039	0.0340772	0.295917	0.30431
ENSSSCG00000015753	ANGPT2	turquoise	-0.567155	0.0344194	0.816648	0.000364887
ENSSSCG00000001087	MRS2	turquoise	-0.567097	0.0344422	0.836155	0.000194317
ENSSSCG00000035579	U6	turquoise	-0.566796	0.0345594	0.425147	0.129665
ENSSSCG00000039194	KANK2	turquoise	0.565752	0.0349681	-0.859565	8.12687e-05
ENSSSCG00000022618	CMTM8	turquoise	-0.565654	0.0350068	0.577484	0.0305742
ENSSSCG00000014239	CEP120	turquoise	-0.564978	0.0352738	0.560408	0.0371174
ENSSSCG00000006866	DBT	turquoise	-0.563976	0.0356719	0.855324	9.62217e-05
ENSSSCG00000010457	KIF20B	turquoise	-0.563571	0.0358338	0.540656	0.0459128
ENSSSCG00000035811	RPL32	turquoise	-0.562968	0.0360759	0.805171	0.0005115
ENSSSCG00000012920	CORO1B	turquoise	0.56211	0.0364225	-0.767144	0.00136414
ENSSSCG00000000176	DDX23	turquoise	-0.55901	0.0376955	0.547335	0.0427843
ENSSSCG00000043195	TMEM115	turquoise	0.558936	0.0377263	-0.839628	0.000172241
ENSSSCG00000011963	TOMM70	turquoise	-0.558923	0.0377318	0.867872	5.74398e-05
ENSSSCG00000044659		turquoise	-0.558624	0.0378564	0.855607	9.51601e-05
ENSSSCG00000023279	SH3TC2	turquoise	0.55823	0.0380207	-0.885645	2.51274e-05
ENSSSCG00000009509	IPO5	turquoise	-0.557437	0.0383535	0.739577	0.00250064
ENSSSCG00000011272		turquoise	-0.5547	0.0395191	0.85399	0.000101361
ENSSSCG00000021065	NAA60	turquoise	0.55351	0.040034	-0.697537	0.00554773
ENSSSCG00000026733	HIPK2	turquoise	0.552955	0.0402755	-0.783693	0.000911226
ENSSSCG00000041401		turquoise	-0.552414	0.0405125	0.886524	2.40374e-05
ENSSSCG00000004419	SLC16A10	turquoise	0.552333	0.0405478	-0.695177	0.00577933
ENSSSCG00000048435		turquoise	-0.551895	0.0407405	0.689614	0.00635519
ENSSSCG00000032303	ENTPD2	turquoise	0.551577	0.0408805	-0.869583	5.3324e-05
ENSSSCG00000004279	OGFRL1	turquoise	0.551547	0.0408939	-0.507307	0.0640746
ENSSSCG00000010566	FBXW4	turquoise	0.550796	0.0412262	-0.547218	0.0428378
ENSSSCG00000028788	BORCS6	turquoise	0.549706	0.0417126	-0.621868	0.0175762
ENSSSCG00000040439	TMED5	turquoise	-0.549149	0.0419626	0.839172	0.000175017
ENSSSCG00000037798		turquoise	0.547698	0.0426192	-0.489251	0.0758104
ENSSSCG00000050773		turquoise	-0.54738	0.0427638	0.916004	4.22233e-06
ENSSSCG00000041035		turquoise	-0.547113	0.0428857	0.791019	0.000753826
ENSSSCG00000008546	GPN1	turquoise	-0.546151	0.0433275	0.574748	0.0315598
ENSSSCG00000000859	PARPBP	turquoise	-0.545665	0.0435517	0.881492	3.08352e-05
ENSSSCG00000012689	ZNF75D	turquoise	-0.545663	0.0435527	0.908238	7.0549e-06
ENSSSCG00000002381	NEK9	turquoise	-0.5456	0.0435815	0.822957	0.000300082
ENSSSCG00000031738		turquoise	0.545595	0.0435841	-0.448058	0.108117
ENSSSCG00000048785		turquoise	0.545101	0.0438131	-0.892858	1.72741e-05
ENSSSCG00000014627	SMPD1	turquoise	0.543873	0.0443858	-0.89353	1.66587e-05
ENSSSCG00000006859	DPH5	turquoise	-0.543548	0.0445385	0.807645	0.000476465
ENSSSCG00000016970		turquoise	-0.542667	0.0449538	0.534683	0.0488491
ENSSSCG00000027118		turquoise	0.542594	0.0449884	-0.526565	0.0530554
ENSSSCG00000003592	SDC3	turquoise	0.539855	0.0462987	-0.926024	2.01459e-06
ENSSSCG00000026146	GALNT5	turquoise	-0.538764	0.0468286	0.882401	2.95037e-05
ENSSSCG00000011699	HPS3	turquoise	0.538141	0.0471328	-0.616889	0.0187752
ENSSSCG00000016911	MTREX	turquoise	-0.53765	0.0473741	0.859827	8.04105e-05
ENSSSCG00000039327	DAPP1	turquoise	0.536714	0.0478355	-0.854763	9.83571e-05
ENSSSCG00000022758	PECR	turquoise	0.536282	0.0480498	-0.567554	0.0342646
ENSSSCG00000032644	HLX	turquoise	-0.53609	0.0481453	0.623037	0.0173032
ENSSSCG00000010997	SPINK4	turquoise	0.535916	0.0482318	-0.522608	0.0551983
ENSSSCG00000029003		turquoise	-0.535751	0.0483143	0.626757	0.0164561
ENSSSCG00000031912		turquoise	0.535682	0.0483486	-0.911016	5.90299e-06
ENSSSCG00000006016	EIF3H	turquoise	-0.535669	0.0483553	0.804558	0.000520491
ENSSSCG00000036364	EGR4	turquoise	0.534915	0.0487327	-0.636657	0.014355
ENSSSCG00000009407	ESD	turquoise	-0.53321	0.0495938	0.807479	0.000478759
ENSSSCG00000016223	ACSL3	turquoise	-0.533131	0.0496337	0.739575	0.0025007
ENSSSCG00000009460	DIS3	turquoise	-0.532967	0.0497172	0.636787	0.0143289
ENSSSCG00000038993	HOXC4	turquoise	0.532892	0.0497554	-0.723601	0.00344037
ENSSSCG00000001819	MAN2A2	turquoise	0.532761	0.0498222	-0.7122	0.00426599
ENSSSCG00000015422	PMPCB	turquoise	-0.532711	0.0498477	0.886409	2.41784e-05
ENSSSCG00000023126	TARDBP	turquoise	-0.532302	0.0500566	0.820363	0.000325493
ENSSSCG00000024759		turquoise	-0.532131	0.0501444	0.920404	3.08734e-06
ENSSSCG00000005983	ATAD2	turquoise	-0.531857	0.0502849	0.867865	5.74564e-05
ENSSSCG00000018972	SNORA33	turquoise	-0.531479	0.0504792	0.582933	0.0286791
ENSSSCG00000015549	RNASEL	turquoise	-0.531442	0.0504983	0.85951	8.14492e-05
ENSSSCG00000013298	PDHX	turquoise	-0.530941	0.0507569	0.914784	4.59154e-06
ENSSSCG00000014580	RIC3	turquoise	0.530181	0.0511506	-0.559563	0.037466
ENSSSCG00000047357		turquoise	0.530006	0.0512415	-0.720557	0.00364726
ENSSSCG00000000925	C12orf29	turquoise	-0.529238	0.0516427	0.714858	0.00406094
ENSSSCG00000017184	PRPSAP1	turquoise	0.52907	0.0517308	-0.663606	0.00966411
ENSSSCG00000051567		turquoise	0.527977	0.0523059	-0.669227	0.00885641
ENSSSCG00000012905	TMEM134	turquoise	0.527688	0.0524584	-0.831528	0.000227236
ENSSSCG00000036529		turquoise	-0.527508	0.0525536	0.616563	0.0188558
ENSSSCG00000006231	CHD7	turquoise	-0.527454	0.0525828	0.888766	2.14326e-05
ENSSSCG00000047571		turquoise	0.527333	0.0526468	-0.586937	0.0273437
ENSSSCG00000000398	APOF	turquoise	-0.52711	0.0527652	0.435065	0.12001
ENSSSCG00000014088	IQGAP2	turquoise	0.526349	0.053171	-0.832408	0.000220651
ENSSSCG00000046117		turquoise	0.526348	0.0531713	-0.251116	0.386495
ENSSSCG00000033162	UBAC1	turquoise	0.526321	0.0531857	-0.643018	0.0131176
ENSSSCG00000005663		turquoise	0.526083	0.0533131	-0.533645	0.0493727
ENSSSCG00000039986	RGS8	turquoise	-0.525809	0.0534601	0.876776	3.85603e-05
ENSSSCG00000039618	COX20	turquoise	-0.525095	0.0538443	0.884414	2.67203e-05
ENSSSCG00000000368	MMP19	turquoise	-0.524982	0.0539056	0.631379	0.015448
ENSSSCG00000024149	ELOVL5	turquoise	-0.524704	0.0540556	0.871284	4.94744e-05
ENSSSCG00000029267	TIGIT	turquoise	-0.524528	0.0541511	0.641648	0.0133769
ENSSSCG00000016469	TRPV5	turquoise	0.523934	0.0544733	-0.802425	0.000552771
ENSSSCG00000017566	ACSF2	turquoise	0.52392	0.0544811	-0.408338	0.147197
ENSSSCG00000021040	SLC26A11	turquoise	0.52335	0.054792	-0.920065	3.16466e-06
ENSSSCG00000004896	PHLPP1	turquoise	0.523283	0.0548285	-0.762079	0.00153369
ENSSSCG00000024344	CCR5	turquoise	-0.523277	0.0548315	0.920985	2.9584e-06
ENSSSCG00000007171	EBF4	turquoise	-0.523231	0.0548568	0.655316	0.0109579
ENSSSCG00000034616	LRRC58	turquoise	-0.523086	0.0549364	0.807677	0.000476026
ENSSSCG00000035941	DSEL	turquoise	-0.523059	0.0549511	0.622388	0.0174544
ENSSSCG00000024667	MICU2	turquoise	-0.522932	0.0550204	0.635202	0.0146503
ENSSSCG00000040342		turquoise	-0.522286	0.0553756	0.593567	0.0252353
ENSSSCG00000034131	TXNDC5	turquoise	0.522117	0.0554685	-0.889801	2.03103e-05
ENSSSCG00000025799		turquoise	-0.520971	0.0561031	0.788293	0.000809622
ENSSSCG00000027822	CORT	turquoise	0.519226	0.057079	-0.439161	0.116169
ENSSSCG00000010240	DNA2	turquoise	-0.519217	0.0570839	0.618236	0.018445
ENSSSCG00000001021		turquoise	0.518838	0.0572974	-0.767834	0.00134223
ENSSSCG00000033259	ARMH1	turquoise	0.517203	0.0582255	-0.515039	0.0594704
ENSSSCG00000012767	HAUS7	turquoise	0.516499	0.0586284	-0.514195	0.059961
ENSSSCG00000014827	PLEKHB1	turquoise	0.516136	0.0588368	-0.921142	2.92434e-06
ENSSSCG00000008268	AUP1	turquoise	0.515937	0.0589515	-0.512578	0.0609091
ENSSSCG00000009567	RASA3	turquoise	0.515855	0.0589988	-0.869687	5.30817e-05
ENSSSCG00000036741	PITX1	turquoise	0.515837	0.0590089	-0.847108	0.000131548
ENSSSCG00000009166	MANBA	turquoise	0.515621	0.0591338	0.374689	0.186848
ENSSSCG00000009709	MFAP3L	turquoise	0.515526	0.0591887	-0.658201	0.0104934
ENSSSCG00000007719		turquoise	0.515415	0.0592526	-0.783706	0.000910922
ENSSSCG00000037465	SERP1	turquoise	-0.515219	0.0593661	0.598777	0.0236659
ENSSSCG00000023127		turquoise	0.515208	0.0593722	-0.589981	0.0263601
ENSSSCG00000043220	ssc-mir-27a	turquoise	0.514977	0.0595064	-0.552291	0.0405665
ENSSSCG00000032684	BOK	turquoise	0.51388	0.0601449	-0.884509	2.65946e-05
ENSSSCG00000006757	TRIM33	turquoise	-0.513656	0.0602755	0.887787	2.25407e-05
ENSSSCG00000036844	GPR171	turquoise	0.513481	0.0603781	-0.327729	0.252678
ENSSSCG00000005707	FIBCD1	turquoise	0.513335	0.0604636	-0.667369	0.00911745
ENSSSCG00000008396	CCDC85A	turquoise	0.51314	0.0605782	-0.331706	0.246622
ENSSSCG00000015423	DNAJC2	turquoise	-0.51296	0.0606839	0.75948	0.001627
ENSSSCG00000051147		turquoise	0.512601	0.0608953	-0.914895	4.55695e-06
ENSSSCG00000045695		turquoise	-0.512558	0.060921	0.821111	0.000317997
ENSSSCG00000040919	RTN4RL2	turquoise	0.512333	0.0610536	-0.473838	0.0869688
ENSSSCG00000040118		turquoise	0.512092	0.0611958	-0.824978	0.000281413
ENSSSCG00000008452	LRPPRC	turquoise	-0.51149	0.0615532	0.913626	4.96596e-06
ENSSSCG00000009856	NOS1	turquoise	0.510876	0.0619187	-0.585025	0.0279755
ENSSSCG00000039243	CD81	turquoise	0.510447	0.0621749	-0.85375	0.000102309
ENSSSCG00000005948	TG	turquoise	-0.509789	0.0625696	0.801983	0.000559656
ENSSSCG00000051493		turquoise	-0.509351	0.0628332	0.88021	3.27974e-05
ENSSSCG00000033594		turquoise	-0.509325	0.0628489	0.360822	0.205002
ENSSSCG00000016816	ADAMTS12	turquoise	0.508829	0.0631489	-0.488331	0.0764462
ENSSSCG00000028501		turquoise	0.508801	0.0631654	-0.513514	0.0603586
ENSSSCG00000005679	ASB6	turquoise	0.508764	0.0631879	-0.483569	0.0797987
ENSSSCG00000006878	DPYD	turquoise	-0.508326	0.0634535	0.873229	4.53539e-05
ENSSSCG00000039962	HSPB1	turquoise	0.507586	0.0639042	-0.903006	9.72602e-06
ENSSSCG00000007355	TOP1	turquoise	-0.506113	0.0648075	0.903658	9.35413e-06
ENSSSCG00000039222		turquoise	0.505994	0.0648807	-0.559645	0.037432
ENSSSCG00000009293		turquoise	0.505899	0.0649397	-0.823478	0.000295173
ENSSSCG00000043123		turquoise	0.504904	0.065556	-0.831718	0.000225801
ENSSSCG00000005626	FPGS	turquoise	-0.504826	0.0656046	0.721072	0.00361162
ENSSSCG00000017504	CDK12	turquoise	-0.504675	0.0656982	0.737919	0.00258741
ENSSSCG00000027491		turquoise	-0.504644	0.0657178	0.676485	0.00789165
ENSSSCG00000003613	HDAC1	turquoise	-0.504397	0.0658719	0.668411	0.00897031
ENSSSCG00000035880	U6	turquoise	-0.503348	0.066528	0.614013	0.0194955
ENSSSCG00000014634	C11orf42	turquoise	0.503285	0.0665676	-0.894906	1.54559e-05
ENSSSCG00000012983	PCNX3	turquoise	0.503111	0.0666774	-0.499527	0.0689591
ENSSSCG00000023991	RIT1	turquoise	-0.502256	0.0672168	-0.432714	0.122253
ENSSSCG00000044810		turquoise	0.502239	0.0672271	-0.296067	0.304055
ENSSSCG00000002768	CENPT	turquoise	-0.501999	0.0673794	0.501646	0.0676035
ENSSSCG00000004628	TMOD2	turquoise	0.501897	0.067444	-0.657077	0.0106725
ENSSSCG00000014019	MAML1	turquoise	-0.501727	0.0675518	0.706564	0.00472771
ENSSSCG00000022940	G3BP2	turquoise	-0.501154	0.0679164	0.88014	3.29071e-05
ENSSSCG00000044397		turquoise	0.500743	0.0681786	-0.688714	0.00645246
ENSSSCG00000027974	MRPL50	turquoise	-0.50067	0.0682258	0.556945	0.0385613
ENSSSCG00000038062		turquoise	-0.500175	0.0685427	0.903008	9.72469e-06
ENSSSCG00000049982		turquoise	-0.500037	0.0686312	-0.354498	0.213637
ENSSSCG00000031169		turquoise	-0.499804	0.0687809	0.878932	3.48536e-05
ENSSSCG00000020976	CSRP1	turquoise	0.49961	0.0689059	-0.902359	1.01075e-05
ENSSSCG00000035836		turquoise	-0.499583	0.0689231	0.621821	0.0175872
ENSSSCG00000000161	PWP1	turquoise	-0.498947	0.0693335	0.638769	0.0139348
ENSSSCG00000016763	GLI3	turquoise	-0.498575	0.0695747	0.809641	0.000449634
ENSSSCG00000008170		turquoise	-0.498339	0.0697278	0.765843	0.00140618
ENSSSCG00000017152	SGSH	turquoise	0.498241	0.0697917	-0.895371	1.50652e-05
ENSSSCG00000004792	FAM98B	turquoise	-0.498029	0.0699295	0.850619	0.00011535
ENSSSCG00000038900		turquoise	-0.498008	0.0699431	0.864297	6.68762e-05
ENSSSCG00000036331		turquoise	-0.497824	0.0700631	0.421163	0.133686
ENSSSCG00000032768	EBP	turquoise	-0.497764	0.0701022	0.497513	0.0702662
ENSSSCG00000033647		turquoise	-0.497526	0.0702573	0.742532	0.00235161
ENSSSCG00000015589	VASH2	turquoise	-0.49673	0.0707785	0.486859	0.0774721
ENSSSCG00000011714	MED12L	turquoise	-0.496042	0.0712315	0.859548	8.13248e-05
ENSSSCG00000033310		turquoise	-0.495223	0.0717731	0.847678	0.000128799
ENSSSCG00000007858		turquoise	0.495219	0.0717757	-0.461422	0.0967556
ENSSSCG00000042750		turquoise	-0.495011	0.0719132	0.35153	0.217766
ENSSSCG00000032234	TMEM165	turquoise	-0.495004	0.0719181	0.736071	0.00268699
ENSSSCG00000035738		turquoise	-0.494451	0.0722861	0.535276	0.0485514
ENSSSCG00000026248		turquoise	0.493761	0.0727469	-0.878876	3.49461e-05
ENSSSCG00000035825	UBE2QL1	turquoise	0.49293	0.0733048	-0.763306	0.00149115
ENSSSCG00000016230	EPHA4	turquoise	0.491574	0.0742214	-0.928132	1.7016e-06
ENSSSCG00000017127	CYBC1	turquoise	0.491203	0.0744737	-0.755862	0.00176431
ENSSSCG00000049778		turquoise	-0.49082	0.0747342	0.714688	0.00407379
ENSSSCG00000004679	SORD	turquoise	-0.490494	0.0749568	0.770459	0.00126147
ENSSSCG00000038714	MFSD9	turquoise	0.490157	0.0751879	-0.472206	0.088214
ENSSSCG00000031424	NECAB1	turquoise	0.489892	0.0753697	-0.574134	0.0317844
ENSSSCG00000025975	FAM83E	turquoise	0.489598	0.0755713	-0.516889	0.058405
ENSSSCG00000006465	INSRR	turquoise	-0.489071	0.0759345	0.79694	0.00064324
ENSSSCG00000000046	CYP2D6	turquoise	-0.488926	0.0760348	0.856682	9.12096e-05
ENSSSCG00000017223	USH1G	turquoise	0.488813	0.0761131	-0.428555	0.12629
ENSSSCG00000018031	ZNF287	turquoise	-0.488458	0.0763582	0.672539	0.0084055
ENSSSCG00000046031		turquoise	-0.48824	0.0765092	0.630731	0.0155865
ENSSSCG00000009369	COG6	turquoise	-0.48753	0.0770031	0.876569	3.89315e-05
ENSSSCG00000015850	DUSP4	turquoise	0.487518	0.0770115	-0.858526	8.47438e-05
ENSSSCG00000003833	DAB1	turquoise	-0.485914	0.0781349	0.631275	0.0154702
ENSSSCG00000025028	XIAP	turquoise	-0.485681	0.0782996	0.952913	1.42131e-07
ENSSSCG00000004821	ASB7	turquoise	-0.485421	0.0784832	0.886964	2.35072e-05
ENSSSCG00000007806	RABEP2	turquoise	0.485277	0.0785845	-0.440812	0.114645
ENSSSCG00000015820	NSD3	turquoise	-0.48523	0.0786175	0.90755	7.36716e-06
ENSSSCG00000015299	STEAP4	turquoise	-0.485096	0.0787127	0.934652	9.75595e-07
ENSSSCG00000015882	BAZ2B	turquoise	-0.485069	0.0787318	0.830165	0.000237753
ENSSSCG00000014891	GAB2	turquoise	0.485068	0.0787324	-0.944788	3.62848e-07
ENSSSCG00000050547		turquoise	-0.485067	0.0787332	-0.504935	0.0655368
ENSSSCG00000039947	KCNJ2	turquoise	-0.484871	0.0788724	0.781345	0.000966887
ENSSSCG00000016207	RETREG2	turquoise	0.484846	0.0788898	-0.746095	0.00218138
ENSSSCG00000002001	REC8	turquoise	-0.484374	0.0792245	0.683973	0.00698387
ENSSSCG00000012325	SMC1A	turquoise	-0.484337	0.0792513	0.869188	5.42529e-05
ENSSSCG00000023112	PDS5A	turquoise	-0.483978	0.0795066	0.816931	0.000361757
ENSSSCG00000026084	SLC49A3	turquoise	0.483824	0.0796164	-0.894666	1.56602e-05
ENSSSCG00000004212		turquoise	0.483207	0.0800574	-0.386416	0.172328
ENSSSCG00000004985	GEMIN2	turquoise	-0.482617	0.0804807	0.623176	0.017271
ENSSSCG00000005090	MNAT1	turquoise	-0.482427	0.080618	0.715676	0.00399938
ENSSSCG00000000551	ARNTL2	turquoise	-0.481616	0.0812028	0.886318	2.429e-05
ENSSSCG00000022845	PJA2	turquoise	-0.481302	0.0814306	0.78549	0.000870377
ENSSSCG00000005664	LRRC8A	turquoise	0.480396	0.0820891	-0.872802	4.62342e-05
ENSSSCG00000011763	MRPL47	turquoise	-0.479783	0.0825365	0.751888	0.00192559
ENSSSCG00000015775	DCTD	turquoise	-0.479606	0.0826663	0.671368	0.00856284
ENSSSCG00000014855	RPS3	turquoise	-0.479173	0.0829837	0.884906	2.60744e-05
ENSSSCG00000003374	ESPN	turquoise	0.479096	0.0830403	-0.82661	0.000267025
ENSSSCG00000031991		turquoise	-0.479083	0.0830501	0.842999	0.000152799
ENSSSCG00000034178	AIF1L	turquoise	0.478875	0.0832032	-0.457402	0.100083
ENSSSCG00000012463	CHM	turquoise	0.478858	0.0832156	-0.885555	2.52411e-05
ENSSSCG00000014195	MAN2A1	turquoise	0.47856	0.0834356	-0.881827	3.03388e-05
ENSSSCG00000014565		turquoise	-0.478208	0.0836954	0.635457	0.0145982
ENSSSCG00000004549	RBPMS2	turquoise	0.477975	0.0838676	-0.513454	0.0603942
ENSSSCG00000025120	BORA	turquoise	-0.477206	0.084438	0.584402	0.0281838
ENSSSCG00000012811	VBP1	turquoise	-0.476959	0.0846217	0.914829	4.57754e-06
ENSSSCG00000006481	GPATCH4	turquoise	-0.476726	0.084795	0.803413	0.000537622
ENSSSCG00000015590	FLVCR1	turquoise	-0.476459	0.0849944	0.911472	5.72958e-06
ENSSSCG00000050339		turquoise	0.476421	0.0850229	-0.533668	0.0493614
ENSSSCG00000000207		turquoise	-0.475952	0.0853737	0.397488	0.15931
ENSSSCG00000004672	GATM	turquoise	0.475573	0.0856582	-0.926308	1.96984e-06
ENSSSCG00000039575	PALM	turquoise	0.475453	0.0857483	-0.947905	2.57787e-07
ENSSSCG00000043719		turquoise	-0.475363	0.0858159	0.790828	0.00075763
ENSSSCG00000017866	TAX1BP3	turquoise	0.475026	0.0860696	-0.878557	3.54766e-05
ENSSSCG00000014980	CFAP300	turquoise	-0.474052	0.0868061	0.72178	0.00356298
ENSSSCG00000025507	RPL27	turquoise	-0.473922	0.0869046	0.929422	1.53072e-06
ENSSSCG00000009977	RASL10A	turquoise	0.473769	0.0870207	-0.585124	0.0279428
ENSSSCG00000043135		turquoise	0.473655	0.0871073	-0.553143	0.0401935
ENSSSCG00000037204	ZNF248	turquoise	-0.473536	0.087198	0.689042	0.00641693
ENSSSCG00000050682		turquoise	-0.473249	0.0874167	0.608884	0.0208318
ENSSSCG00000015937	KLHL23	turquoise	-0.473071	0.0875522	0.464445	0.0943055
ENSSSCG00000001562	KCTD20	turquoise	-0.472949	0.0876451	0.895828	1.46898e-05
ENSSSCG00000035074	FOXO6	turquoise	0.472803	0.0877565	-0.760977	0.00157275
ENSSSCG00000045922		turquoise	-0.472238	0.0881894	0.95616	9.32271e-08
ENSSSCG00000026516	EPHB3	turquoise	0.471984	0.0883839	-0.89156	1.85141e-05
ENSSSCG00000037390		turquoise	-0.471846	0.0884901	0.553807	0.0399048
ENSSSCG00000015652	IL10	turquoise	-0.471521	0.0887397	0.84316	0.000151917
ENSSSCG00000008963	AREG	turquoise	-0.471301	0.0889094	0.947775	2.61617e-07
ENSSSCG00000016744	TMED4	turquoise	-0.470333	0.0896577	0.650413	0.0117833
ENSSSCG00000043496		turquoise	-0.469886	0.0900049	0.808407	0.000466079
ENSSSCG00000002263	SLCO3A1	turquoise	0.469485	0.0903177	-0.909012	6.71719e-06
ENSSSCG00000009157	TET2	turquoise	-0.469424	0.0903645	0.8748	4.22342e-05
ENSSSCG00000033167	SLC7A6OS	turquoise	-0.4693	0.0904613	0.919165	3.37792e-06
ENSSSCG00000010800	B3GALT2	turquoise	-0.469171	0.0905625	0.91287	5.22395e-06
ENSSSCG00000031592	ZNF462	turquoise	0.469009	0.090689	-0.904339	8.97755e-06
ENSSSCG00000015743	PTPN4	turquoise	-0.468941	0.0907422	0.819341	0.000335975
ENSSSCG00000036339	FAM126B	turquoise	-0.468145	0.0913657	0.954244	1.20013e-07
ENSSSCG00000008482	GEMIN6	turquoise	-0.467988	0.0914896	0.361192	0.204504
ENSSSCG00000002306	GALNT16	turquoise	0.467849	0.0915988	-0.854051	0.000101124
ENSSSCG00000008684	POLN	turquoise	0.467449	0.091914	-0.775802	0.00110909
ENSSSCG00000040673	TMEM140	turquoise	0.467358	0.0919856	-0.5792	0.0299675
ENSSSCG00000010062	CABIN1	turquoise	0.467322	0.0920142	-0.880671	3.20801e-05
ENSSSCG00000026890	GALNT6	turquoise	0.467216	0.0920978	-0.920924	2.97179e-06
ENSSSCG00000005486	KIF12	turquoise	-0.466818	0.0924133	0.873755	4.42875e-05
ENSSSCG00000021210	HIKESHI	turquoise	0.466727	0.092485	-0.299444	0.298308
ENSSSCG00000040273		turquoise	-0.46668	0.0925219	0.65762	0.0105857
ENSSSCG00000012459	APOOL	turquoise	-0.466603	0.0925833	0.805393	0.000508271
ENSSSCG00000006172	PI15	turquoise	0.466435	0.0927167	-0.934967	9.48378e-07
ENSSSCG00000023267	SCN1B	turquoise	0.466375	0.0927641	-0.89242	1.76849e-05
ENSSSCG00000032016		turquoise	-0.46591	0.0931344	0.536023	0.0481785
ENSSSCG00000031510	FNTA	turquoise	-0.465522	0.0934435	0.9331	1.11932e-06
ENSSSCG00000005922		turquoise	0.464648	0.0941426	-0.739906	0.00248364
ENSSSCG00000034994	AKAP1	turquoise	-0.464597	0.0941837	0.85384	0.000101954
ENSSSCG00000043102		turquoise	0.464373	0.0943634	-0.584139	0.0282721
ENSSSCG00000009497		turquoise	0.463975	0.0946836	-0.406431	0.14928
ENSSSCG00000000660	A2M	turquoise	0.463958	0.0946979	-0.887703	2.26371e-05
ENSSSCG00000012167	PHEX	turquoise	0.463949	0.0947048	-0.548429	0.0422876
ENSSSCG00000029323	KCNE3	turquoise	-0.463204	0.0953061	0.486894	0.0774471
ENSSSCG00000007155	DNAAF9	turquoise	0.46307	0.0954151	-0.870716	5.07338e-05
ENSSSCG00000017358	SLC4A1	turquoise	0.46301	0.0954632	-0.840858	0.000164927
ENSSSCG00000028871	CSTA	turquoise	-0.463	0.0954712	0.90451	8.88527e-06
ENSSSCG00000040719	KIAA0040	turquoise	-0.462523	0.0958581	0.880536	3.22899e-05
ENSSSCG00000013585	EVI5L	turquoise	0.462332	0.0960137	-0.903575	9.40049e-06
ENSSSCG00000033520	IL23A	turquoise	0.462317	0.0960257	-0.253977	0.380927
ENSSSCG00000009565	GAS6	turquoise	0.46219	0.0961294	-0.821566	0.000313504
ENSSSCG00000049630	DEPTOR	turquoise	0.462059	0.096236	-0.90025	1.14362e-05
ENSSSCG00000001916	INSYN1	turquoise	0.46193	0.0963411	-0.851404	0.000111962
ENSSSCG00000000449	DTX3	turquoise	0.461868	0.0963916	-0.774421	0.00114698
ENSSSCG00000030781	C17orf67	turquoise	0.461413	0.096763	-0.899768	1.17591e-05
ENSSSCG00000012638	GRIA3	turquoise	-0.461406	0.0967687	0.930891	1.35365e-06
ENSSSCG00000045287		turquoise	0.460913	0.0971727	-0.621031	0.0177736
ENSSSCG00000010319	SAMD8	turquoise	-0.460852	0.0972229	0.81151	0.000425623
ENSSSCG00000030528	LTN1	turquoise	-0.460479	0.0975289	0.866826	6.00788e-05
ENSSSCG00000039885	PTP4A2	turquoise	-0.460383	0.0976078	0.93447	9.91634e-07
ENSSSCG00000016922	GPBP1	turquoise	-0.460233	0.0977316	0.938558	6.79858e-07
ENSSSCG00000037002	SERTAD2	turquoise	-0.460083	0.0978555	0.912185	5.46692e-06
ENSSSCG00000045307		turquoise	-0.459662	0.0982029	0.771502	0.00123049
ENSSSCG00000009584	SEMA4D	turquoise	0.459626	0.0982328	-0.787146	0.000834063
ENSSSCG00000011740	SERPINI1	turquoise	-0.45911	0.0986593	0.875815	4.03129e-05
ENSSSCG00000004140	VTA1	turquoise	-0.458928	0.0988103	0.924238	2.31541e-06
ENSSSCG00000012405	RPS4X	turquoise	-0.458518	0.0991511	0.853943	0.000101548
ENSSSCG00000049595		turquoise	-0.458177	0.0994346	0.675611	0.00800333
ENSSSCG00000029710	GCNT4	turquoise	-0.458152	0.0994557	0.700849	0.00523489
ENSSSCG00000026746		turquoise	-0.457959	0.0996167	0.535667	0.0483561
ENSSSCG00000024336	TMPRSS2	turquoise	0.457859	0.0997	-0.837003	0.000188731
ENSSSCG00000038960		turquoise	-0.457719	0.099817	0.89999	1.16091e-05
ENSSSCG00000000185	PRKAG1	turquoise	0.457496	0.100003	-0.8996	1.18734e-05
ENSSSCG00000012617	UPF3B	turquoise	-0.457371	0.100108	0.584122	0.0282778
ENSSSCG00000015926	ABCB11	turquoise	-0.457277	0.100186	0.837632	0.000184667
ENSSSCG00000039264		turquoise	0.457066	0.100364	-0.84196	0.000158592
ENSSSCG00000012035	SYNJ1	turquoise	0.456655	0.100709	-0.90694	7.65339e-06
ENSSSCG00000034868		turquoise	0.456647	0.100715	-0.730583	0.00300051
ENSSSCG00000008702	DOK7	turquoise	-0.456316	0.100994	0.1865	0.523215
ENSSSCG00000041057		turquoise	-0.456266	0.101036	0.431594	0.123332
ENSSSCG00000035240	GPR63	turquoise	-0.456257	0.101044	0.652619	0.0114062
ENSSSCG00000012828	STARD8	turquoise	0.455973	0.101283	-0.470876	0.0892376
ENSSSCG00000005593	OLFML2A	turquoise	0.455422	0.101749	-0.772809	0.00119251
ENSSSCG00000011183	ATP2C1	turquoise	-0.454834	0.102248	0.938886	6.58817e-07
ENSSSCG00000049333		turquoise	-0.454786	0.102288	0.463792	0.0948315
ENSSSCG00000050313		turquoise	-0.454625	0.102425	0.901243	1.07938e-05
ENSSSCG00000028725	TMEM102	turquoise	0.45455	0.10249	-0.730924	0.00298021
ENSSSCG00000040406	IL17C	turquoise	0.454488	0.102542	-0.29227	0.310591
ENSSSCG00000046431		turquoise	0.454401	0.102617	-0.524016	0.0544287
ENSSSCG00000003391	CA6	turquoise	0.454319	0.102686	-0.87654	3.89839e-05
ENSSSCG00000026451	U6	turquoise	-0.454311	0.102693	0.846695	0.000133568
ENSSSCG00000036722	MALSU1	turquoise	-0.454252	0.102743	0.825965	0.000272635
ENSSSCG00000009591	AUH	turquoise	-0.454237	0.102756	0.916828	3.98718e-06
ENSSSCG00000002366	NPC2	turquoise	0.453932	0.103016	-0.866569	6.07434e-05
ENSSSCG00000004657	CEP152	turquoise	0.453917	0.103029	-0.913773	4.91735e-06
ENSSSCG00000005472	SLC46A2	turquoise	0.453873	0.103066	-0.931658	1.2681e-06
ENSSSCG00000048738		turquoise	-0.453743	0.103178	0.64933	0.0119718
ENSSSCG00000046214	IFT22	turquoise	-0.453638	0.103267	0.498361	0.0697138
ENSSSCG00000042629		turquoise	0.453495	0.103389	-0.588304	0.0268986
ENSSSCG00000047326		turquoise	-0.453387	0.103482	0.842676	0.000154583
ENSSSCG00000005611	ZNF79	turquoise	-0.453314	0.103545	0.822091	0.000308376
ENSSSCG00000031725	SNORD14	turquoise	-0.453237	0.103611	0.866741	6.02995e-05
ENSSSCG00000005112	WDR89	turquoise	-0.453072	0.103752	0.785719	0.000865281
ENSSSCG00000022857	TFF3	turquoise	0.452995	0.103818	-0.831464	0.000227724
ENSSSCG00000011486	C3orf14	turquoise	-0.45289	0.103908	0.782174	0.000946918
ENSSSCG00000031700	SLC2A9	turquoise	-0.452431	0.104304	0.85589	9.41075e-05
ENSSSCG00000015543	CACNA1E	turquoise	-0.452185	0.104516	0.859298	8.21509e-05
ENSSSCG00000000263	TNS2	turquoise	0.452174	0.104525	-0.894888	1.54708e-05
ENSSSCG00000048661		turquoise	-0.452135	0.104558	0.724471	0.00338295
ENSSSCG00000006612	S100A10	turquoise	-0.452115	0.104576	0.628319	0.0161099
ENSSSCG00000034942	STAR	turquoise	-0.451904	0.104758	0.680385	0.00740808
ENSSSCG00000000151		turquoise	-0.450735	0.105771	-0.498431	0.0696685
ENSSSCG00000016444		turquoise	0.450411	0.106053	-0.571996	0.0325751
ENSSSCG00000006829	SYPL2	turquoise	0.449823	0.106567	-0.507043	0.0642358
ENSSSCG00000047421		turquoise	-0.44965	0.106718	-0.376337	0.184762
ENSSSCG00000010791	FUOM	turquoise	0.449576	0.106782	-0.472419	0.0880508
ENSSSCG00000029724	RACK1	turquoise	-0.449276	0.107045	0.852172	0.000108724
ENSSSCG00000043409		turquoise	-0.448945	0.107336	0.653913	0.0111893
ENSSSCG00000005057	FBXO34	turquoise	-0.448759	0.1075	0.618046	0.0184912
ENSSSCG00000023050	SEPTIN10	turquoise	0.44866	0.107586	-0.901113	1.08762e-05
ENSSSCG00000025855	RNMT	turquoise	-0.448656	0.10759	0.549645	0.0417397
ENSSSCG00000040694		turquoise	-0.448552	0.107682	0.589421	0.0265389
ENSSSCG00000010164	MAP3K21	turquoise	-0.448418	0.1078	0.496209	0.0711212
ENSSSCG00000002821	CCL22	turquoise	-0.448283	0.107918	0.859343	8.2003e-05
ENSSSCG00000008965		turquoise	0.448275	0.107926	-0.752323	0.00190739
ENSSSCG00000032450	LYRM9	turquoise	0.448181	0.108008	-0.556937	0.0385649
ENSSSCG00000000216	ASIC1	turquoise	-0.448018	0.108152	0.869018	5.46559e-05
ENSSSCG00000031076	MAPK7	turquoise	0.447778	0.108365	-0.691245	0.00618195
ENSSSCG00000032977	PPP1R3E	turquoise	0.447728	0.108409	-0.560487	0.037085
ENSSSCG00000009031	EDNRA	turquoise	-0.447645	0.108482	0.665982	0.00931605
ENSSSCG00000010925	PPP1R12B	turquoise	0.447535	0.108579	-0.911093	5.87352e-06
ENSSSCG00000026083	DNAJC24	turquoise	-0.447217	0.108861	0.890991	1.90806e-05
ENSSSCG00000003694	EMILIN2	turquoise	-0.446811	0.109222	0.930197	1.43512e-06
ENSSSCG00000035696	MCEE	turquoise	-0.446592	0.109417	0.860645	7.77803e-05
ENSSSCG00000031244	GAP43	turquoise	-0.446442	0.10955	0.288178	0.317727
ENSSSCG00000017239	RPL38	turquoise	-0.446306	0.109672	0.734445	0.00277705
ENSSSCG00000004548	PIF1	turquoise	-0.44601	0.109935	0.42327	0.131549
ENSSSCG00000017957	EIF4A1	turquoise	-0.445866	0.110064	0.849742	0.000119239
ENSSSCG00000002968		turquoise	-0.445699	0.110213	-0.316261	0.270637
ENSSSCG00000003775	MSH4	turquoise	-0.445308	0.110563	0.902442	1.00578e-05
ENSSSCG00000026663	DTD2	turquoise	-0.44527	0.110597	0.934509	9.88143e-07
ENSSSCG00000005382	TGFBR1	turquoise	-0.4451	0.110751	0.584632	0.0281069
ENSSSCG00000006781	CTTNBP2NL	turquoise	-0.444779	0.111039	0.942219	4.74012e-07
ENSSSCG00000032698	TPPP	turquoise	0.444535	0.111258	-0.913417	5.03646e-06
ENSSSCG00000005673	IER5L	turquoise	0.444285	0.111483	-0.325415	0.256242
ENSSSCG00000011980	CLDND1	turquoise	-0.444166	0.111591	0.844245	0.000146082
ENSSSCG00000028182	CDK17	turquoise	-0.443861	0.111866	0.861349	7.55749e-05
ENSSSCG00000008714	PSAPL1	turquoise	0.443783	0.111937	-0.838083	0.000181796
ENSSSCG00000014029	COL23A1	turquoise	0.443714	0.111999	-0.941042	5.33606e-07
ENSSSCG00000005379	GALNT12	turquoise	-0.44345	0.112238	0.695199	0.00577711
ENSSSCG00000038441		turquoise	-0.443312	0.112363	0.932906	1.13851e-06
ENSSSCG00000027060	TBX2	turquoise	0.443043	0.112607	-0.722493	0.0035146
ENSSSCG00000034758	PDXK	turquoise	0.44248	0.113119	-0.904507	8.88694e-06
ENSSSCG00000042273		turquoise	0.442033	0.113527	-0.76762	0.00134901
ENSSSCG00000049399		turquoise	-0.441416	0.11409	0.871327	4.9381e-05
ENSSSCG00000009434	RGCC	turquoise	-0.441394	0.114111	0.841502	0.000161201
ENSSSCG00000040083		turquoise	-0.441272	0.114223	0.360177	0.205873
ENSSSCG00000017527	SKAP1	turquoise	0.441258	0.114236	-0.926748	1.90219e-06
ENSSSCG00000036716		turquoise	-0.44122	0.114271	0.600984	0.0230238
ENSSSCG00000022292	NPL	turquoise	-0.44121	0.11428	0.837464	0.000185743
ENSSSCG00000003741		turquoise	0.441108	0.114373	-0.529989	0.0512506
ENSSSCG00000049545		turquoise	-0.440288	0.115127	0.501739	0.0675441
ENSSSCG00000011434	PPM1M	turquoise	0.439781	0.115595	-0.759282	0.0016343
ENSSSCG00000001101	SCGN	turquoise	-0.439284	0.116055	0.931169	1.32208e-06
ENSSSCG00000026087	GKAP1	turquoise	0.438737	0.116563	-0.857099	8.97149e-05
ENSSSCG00000037735		turquoise	-0.438628	0.116664	0.696024	0.00569531
ENSSSCG00000016138	ATF1	turquoise	-0.438255	0.117011	0.835623	0.000197893
ENSSSCG00000028444	ARMC10	turquoise	-0.438112	0.117145	0.92054	3.05671e-06
ENSSSCG00000039556	KCNQ1	turquoise	0.438083	0.117172	-0.903575	9.4005e-06
ENSSSCG00000047090		turquoise	-0.438023	0.117227	0.562663	0.0361989
ENSSSCG00000050591		turquoise	-0.437674	0.117553	0.380403	0.17968
ENSSSCG00000011351	TMA7	turquoise	-0.437453	0.11776	0.832386	0.000220813
ENSSSCG00000032064		turquoise	0.437321	0.117884	-0.798026	0.000624445
ENSSSCG00000043747		turquoise	-0.437217	0.117982	0.844972	0.000142276
ENSSSCG00000039053	VGF	turquoise	-0.437212	0.117986	0.835254	0.000200405
ENSSSCG00000045780		turquoise	-0.43718	0.118016	-0.290082	0.314396
ENSSSCG00000001973	SCFD1	turquoise	-0.436771	0.118399	0.872573	4.67115e-05
ENSSSCG00000002252	ARRDC4	turquoise	-0.436668	0.118497	0.826563	0.000267432
ENSSSCG00000009716	SH3RF1	turquoise	0.43652	0.118636	-0.895169	1.52336e-05
ENSSSCG00000007362	SRSF6	turquoise	-0.436519	0.118636	0.512228	0.0611155
ENSSSCG00000032164	PEA15	turquoise	-0.4364	0.118749	0.865759	6.28737e-05
ENSSSCG00000022900	SUPT16H	turquoise	-0.435984	0.119141	0.885461	2.53609e-05
ENSSSCG00000036693	ZNF658	turquoise	-0.435464	0.119632	0.542485	0.04504
ENSSSCG00000038977	RSBN1L	turquoise	-0.435432	0.119662	0.9098	6.3868e-06
ENSSSCG00000029960	LRRC4B	turquoise	0.435382	0.119709	-0.566904	0.034517
ENSSSCG00000046284		turquoise	-0.435311	0.119776	0.615179	0.0192011
ENSSSCG00000003718	TAF4B	turquoise	-0.435176	0.119905	0.723217	0.0034659
ENSSSCG00000000951	CSRP2	turquoise	-0.435081	0.119995	0.95043	1.92404e-07
ENSSSCG00000008589	WDCP	turquoise	-0.4348	0.120261	0.800492	0.000583399
ENSSSCG00000002669	CRISPLD2	turquoise	-0.434637	0.120416	0.940228	5.78363e-07
ENSSSCG00000036731	TSPAN31	turquoise	-0.433969	0.121052	0.809439	0.000452296
ENSSSCG00000036078	KCNJ3	turquoise	-0.433935	0.121084	0.561771	0.0365601
ENSSSCG00000006066	RNF19A	turquoise	-0.433925	0.121094	0.90002	1.15893e-05
ENSSSCG00000004353	CCNC	turquoise	-0.433735	0.121275	0.874562	4.26936e-05
ENSSSCG00000037663	PKNOX1	turquoise	-0.433335	0.121657	0.708853	0.00453566
ENSSSCG00000003512	EIF4G3	turquoise	-0.433185	0.121802	0.913317	5.07015e-06
ENSSSCG00000032265	TLE5	turquoise	0.433022	0.121957	-0.865718	6.29852e-05
ENSSSCG00000025784	CDH4	turquoise	0.432956	0.122021	-0.494534	0.0722309
ENSSSCG00000006755	DENND2C	turquoise	-0.432811	0.122159	0.431532	0.123391
ENSSSCG00000001440	NOTCH4	turquoise	0.432781	0.122188	-0.614043	0.0194881
ENSSSCG00000013018	CDC42BPG	turquoise	0.432376	0.122577	-0.71484	0.00406227
ENSSSCG00000016782	OTULINL	turquoise	0.432246	0.122703	-0.909043	6.70374e-06
ENSSSCG00000009112	SEC24D	turquoise	-0.432208	0.122739	0.833776	0.000210726
ENSSSCG00000031733	AKAP12	turquoise	0.432168	0.122778	-0.494821	0.0720397
ENSSSCG00000012287	TFE3	turquoise	0.431655	0.123273	-0.734193	0.00279123
ENSSSCG00000013880		turquoise	-0.431354	0.123563	0.925237	2.14295e-06
ENSSSCG00000016451		turquoise	0.431294	0.123621	-0.329593	0.249829
ENSSSCG00000008587	SF3B6	turquoise	-0.431289	0.123626	0.847444	0.000129926
ENSSSCG00000012911	CARNS1	turquoise	-0.430564	0.124329	0.468913	0.0907638
ENSSSCG00000001156	ZNF322	turquoise	-0.430341	0.124545	0.735531	0.00271659
ENSSSCG00000001817	FURIN	turquoise	0.430241	0.124643	-0.958728	6.52716e-08
ENSSSCG00000008383		turquoise	-0.430054	0.124825	0.861782	7.424e-05
ENSSSCG00000035669		turquoise	0.429755	0.125116	-0.935713	8.86408e-07
ENSSSCG00000028420	EIF4E	turquoise	-0.429448	0.125415	0.915303	4.43139e-06
ENSSSCG00000032787	ALAD	turquoise	-0.429398	0.125464	0.862308	7.26485e-05
ENSSSCG00000022048	REEP5	turquoise	0.429389	0.125473	-0.85702	8.99963e-05
ENSSSCG00000005844	NRARP	turquoise	0.428706	0.126142	-0.480575	0.0819583
ENSSSCG00000006836	ELAPOR1	turquoise	-0.428706	0.126142	0.919386	3.32443e-06
ENSSSCG00000034633	CFAP99	turquoise	0.428694	0.126154	-0.460303	0.0976742
ENSSSCG00000000028		turquoise	0.428659	0.126188	-0.802869	0.00054593
ENSSSCG00000029035		turquoise	-0.428603	0.126243	0.650879	0.0117029
ENSSSCG00000028886	IPO7	turquoise	-0.427653	0.127177	0.960097	5.34721e-08
ENSSSCG00000010576	NOLC1	turquoise	-0.427532	0.127297	0.561412	0.0367062
ENSSSCG00000010026	PIK3IP1	turquoise	0.427506	0.127322	-0.958169	7.06665e-08
ENSSSCG00000026254	PRRG3	turquoise	-0.427251	0.127574	0.861035	7.65525e-05
ENSSSCG00000009146	RPL34	turquoise	-0.427215	0.127609	0.675403	0.00803008
ENSSSCG00000033792	RAB40C	turquoise	0.427074	0.12775	-0.714344	0.00409997
ENSSSCG00000024628	ALKBH8	turquoise	-0.427043	0.12778	0.759043	0.00164311
ENSSSCG00000031666	ZFTA	turquoise	-0.426696	0.128123	0.511497	0.0615488
ENSSSCG00000009781	PITPNM2	turquoise	0.426674	0.128145	-0.867441	5.85157e-05
ENSSSCG00000045712	OLFML3	turquoise	-0.426221	0.128595	0.930548	1.39342e-06
ENSSSCG00000004652	COPS2	turquoise	-0.426207	0.128608	0.965639	2.20662e-08
ENSSSCG00000006494	SLC25A44	turquoise	0.425841	0.128972	-0.364485	0.200103
ENSSSCG00000001501	VPS52	turquoise	-0.425821	0.128993	0.240419	0.407703
ENSSSCG00000049524		turquoise	0.425694	0.129119	-0.482065	0.0808788
ENSSSCG00000038579	DKKL1	turquoise	0.425641	0.129171	-0.266191	0.357631
ENSSSCG00000003660	PABPC4	turquoise	-0.425631	0.129182	0.936218	8.46416e-07
ENSSSCG00000038912	IFITM3	turquoise	-0.425564	0.129249	0.910713	6.02066e-06
ENSSSCG00000002704	KARS1	turquoise	-0.425537	0.129276	0.934364	1.00107e-06
ENSSSCG00000021798	LZTS2	turquoise	0.425092	0.129719	-0.96025	5.22704e-08
ENSSSCG00000030118	SAP30	turquoise	-0.425043	0.129769	0.662823	0.00978112
ENSSSCG00000016062	NABP1	turquoise	-0.424969	0.129843	0.930462	1.40347e-06
ENSSSCG00000006933	CLCA1	turquoise	0.424269	0.130544	-0.297521	0.301572
ENSSSCG00000005962		turquoise	-0.424144	0.130669	0.483817	0.0796215
ENSSSCG00000047164		turquoise	0.424127	0.130686	-0.616798	0.0187978
ENSSSCG00000016461	ZYX	turquoise	0.423835	0.13098	-0.912537	5.3408e-06
ENSSSCG00000004460	IBTK	turquoise	-0.42358	0.131236	0.937309	7.64988e-07
ENSSSCG00000027607	IER3	turquoise	0.423572	0.131244	-0.911505	5.71714e-06
ENSSSCG00000016998	NPM1	turquoise	-0.423514	0.131303	0.891201	1.88696e-05
ENSSSCG00000039638		turquoise	-0.423505	0.131312	0.678041	0.00769586
ENSSSCG00000042678		turquoise	-0.42347	0.131348	0.620158	0.0179811
ENSSSCG00000027266	PNPLA3	turquoise	0.423446	0.131371	-0.48724	0.0772055
ENSSSCG00000006277	SPIDR	turquoise	-0.423334	0.131484	0.936928	7.92606e-07
ENSSSCG00000034328	SP7	turquoise	-0.423019	0.131802	0.638427	0.0140021
ENSSSCG00000010290	MCU	turquoise	-0.422785	0.132038	0.837933	0.00018275
ENSSSCG00000004293	SNX14	turquoise	-0.422659	0.132167	0.923754	2.40305e-06
ENSSSCG00000000998	RPP40	turquoise	-0.422556	0.132271	0.693311	0.00596781
ENSSSCG00000017593	UTP18	turquoise	-0.422458	0.13237	0.910252	6.2032e-06
ENSSSCG00000000228	SCN8A	turquoise	-0.421608	0.133232	0.896229	1.43667e-05
ENSSSCG00000016557	CPA1	turquoise	0.421481	0.133362	-0.882005	3.00773e-05
ENSSSCG00000038616		turquoise	-0.421151	0.133698	0.862844	7.10546e-05
ENSSSCG00000020984	LXN	turquoise	0.420931	0.133923	-0.727887	0.00316476
ENSSSCG00000035447		turquoise	0.420774	0.134083	0.324298	0.257973
ENSSSCG00000037562	SLC2A4RG	turquoise	0.420442	0.134422	-0.823279	0.000297035
ENSSSCG00000015604	NEK2	turquoise	-0.420393	0.134472	0.590476	0.0262025
ENSSSCG00000004369	PRDM1	turquoise	-0.420349	0.134518	0.952119	1.56845e-07
ENSSSCG00000036868	CTNNBIP1	turquoise	0.419762	0.13512	-0.952327	1.52882e-07
ENSSSCG00000002860	PDCD5	turquoise	-0.419621	0.135265	0.605381	0.0217834
ENSSSCG00000040535		turquoise	0.419372	0.135521	-0.916133	4.18487e-06
ENSSSCG00000037405	SNORD36	turquoise	-0.419351	0.135542	0.458193	0.0994216
ENSSSCG00000012171	PRDX4	turquoise	-0.41897	0.135935	0.888446	2.17902e-05
ENSSSCG00000000261		turquoise	0.418942	0.135964	-0.928139	1.70066e-06
ENSSSCG00000009259	PAQR3	turquoise	-0.418878	0.13603	0.53566	0.0483597
ENSSSCG00000008451		turquoise	-0.418696	0.136218	0.933979	1.0359e-06
ENSSSCG00000010503	ZNF518A	turquoise	-0.41809	0.136845	0.742835	0.00233676
ENSSSCG00000039963	SNORA3A	turquoise	-0.418058	0.136877	-0.542486	0.0450398
ENSSSCG00000013419	R3HDM4	turquoise	0.41792	0.137021	-0.839608	0.00017236
ENSSSCG00000034976		turquoise	-0.417902	0.137039	0.583093	0.028625
ENSSSCG00000038151	CMTM3	turquoise	0.417056	0.137918	-0.665226	0.00942572
ENSSSCG00000033892	EVA1B	turquoise	0.417044	0.13793	-0.717996	0.00382883
ENSSSCG00000000272	SP1	turquoise	-0.416922	0.138058	0.860188	7.92436e-05
ENSSSCG00000039378	SERPINA4	turquoise	0.416837	0.138147	-0.228296	0.432444
ENSSSCG00000014436	ARHGEF37	turquoise	0.416205	0.138806	-0.928068	1.71056e-06
ENSSSCG00000042989		turquoise	-0.41598	0.139042	-0.367919	0.195578
ENSSSCG00000031186		turquoise	-0.415886	0.139141	0.401965	0.154236
ENSSSCG00000017528	SNX11	turquoise	0.415862	0.139165	-0.934461	9.92443e-07
ENSSSCG00000041619		turquoise	-0.415818	0.139212	0.47666	0.0848446
ENSSSCG00000014979	CEP126	turquoise	-0.41551	0.139534	0.910109	6.2608e-06
ENSSSCG00000008971	USO1	turquoise	-0.414989	0.140081	0.92804	1.71435e-06
ENSSSCG00000036261	CROCC2	turquoise	0.414612	0.140479	-0.881576	3.071e-05
ENSSSCG00000024201	TASOR	turquoise	-0.414472	0.140626	0.62358	0.0171776
ENSSSCG00000004358	ASCC3	turquoise	-0.414167	0.140948	0.627225	0.0163518
ENSSSCG00000041851		turquoise	-0.414112	0.141007	0.802152	0.000557018
ENSSSCG00000007973		turquoise	0.413867	0.141266	-0.936659	8.12656e-07
ENSSSCG00000010219	ARID5B	turquoise	-0.413716	0.141426	0.912626	5.30942e-06
ENSSSCG00000029521	CD82	turquoise	0.412971	0.142216	-0.933233	1.1064e-06
ENSSSCG00000008969	RCHY1	turquoise	-0.412817	0.142379	0.821198	0.000317128
ENSSSCG00000014133	RPS23	turquoise	-0.412602	0.142609	0.802076	0.0005582
ENSSSCG00000017065	MRPL22	turquoise	-0.412575	0.142637	0.938965	6.53858e-07
ENSSSCG00000009720	DDX60	turquoise	-0.412393	0.142831	0.615319	0.0191659
ENSSSCG00000033019		turquoise	-0.412387	0.142837	0.822758	0.000301969
ENSSSCG00000032552		turquoise	0.412367	0.142859	-0.849806	0.000118952
ENSSSCG00000029256	AKR1A1	turquoise	0.412359	0.142867	0.621079	0.0177621
ENSSSCG00000039704		turquoise	0.412323	0.142906	-0.805855	0.000501615
ENSSSCG00000045820		turquoise	0.411967	0.143285	-0.504796	0.0656234
ENSSSCG00000035341	C6orf89	turquoise	-0.411585	0.143694	0.717079	0.00389553
ENSSSCG00000004653	SECISBP2L	turquoise	0.41134	0.143957	-0.766394	0.00138827
ENSSSCG00000010325	KCNMA1	turquoise	-0.411172	0.144137	0.595901	0.0245229
ENSSSCG00000006644	CERS2	turquoise	0.41094	0.144385	-0.88366	2.77368e-05
ENSSSCG00000015100	UPK2	turquoise	-0.410645	0.144702	0.959507	5.83167e-08
ENSSSCG00000012399	FOXO4	turquoise	0.410594	0.144757	-0.782387	0.000941848
ENSSSCG00000009358	EXOSC8	turquoise	-0.410449	0.144913	0.864679	6.58104e-05
ENSSSCG00000036712	TPD52L2	turquoise	0.410101	0.145288	-0.69367	0.00593118
ENSSSCG00000006877	SNX7	turquoise	0.409706	0.145714	-0.860765	7.74026e-05
ENSSSCG00000047676		turquoise	-0.409676	0.145746	0.647941	0.0122171
ENSSSCG00000018462	SNORD65	turquoise	-0.409676	0.145747	0.531373	0.0505336
ENSSSCG00000011864	UMPS	turquoise	-0.409607	0.145821	0.91749	3.806e-06
ENSSSCG00000016582	FAM71F1	turquoise	-0.409589	0.14584	0.463082	0.0954051
ENSSSCG00000016116	WDR12	turquoise	-0.409142	0.146324	0.739212	0.00251954
ENSSSCG00000003329	ACAP3	turquoise	0.408894	0.146592	-0.878212	3.60573e-05
ENSSSCG00000006510		turquoise	-0.408379	0.147153	0.840231	0.000168626
ENSSSCG00000040422		turquoise	-0.408342	0.147192	0.629203	0.0159167
ENSSSCG00000009348		turquoise	0.40804	0.147521	-0.914818	4.58099e-06
ENSSSCG00000001702	SLC35B2	turquoise	-0.407839	0.14774	0.909709	6.42403e-06
ENSSSCG00000043196		turquoise	-0.407751	0.147836	0.95318	1.3744e-07
ENSSSCG00000017325	PLEKHM1	turquoise	0.407595	0.148006	-0.905139	8.55195e-06
ENSSSCG00000023026	CLCN5	turquoise	0.407503	0.148106	-0.837028	0.000188566
ENSSSCG00000001924		turquoise	-0.407477	0.148134	0.914737	4.60639e-06
ENSSSCG00000009859	TESC	turquoise	0.407377	0.148244	-0.928515	1.64935e-06
ENSSSCG00000008768	ARAP2	turquoise	-0.406938	0.148724	0.867746	5.77519e-05
ENSSSCG00000028461		turquoise	0.406734	0.148948	-0.479471	0.0827652
ENSSSCG00000001419	SLC44A4	turquoise	-0.406651	0.149039	0.934976	9.47592e-07
ENSSSCG00000046829		turquoise	-0.406582	0.149115	0.793146	0.000712483
ENSSSCG00000002307	ERH	turquoise	-0.406521	0.149182	0.863547	6.90071e-05
ENSSSCG00000051065		turquoise	-0.406457	0.149251	0.898532	1.26217e-05
ENSSSCG00000016717	PALS2	turquoise	-0.406126	0.149615	0.583792	0.0283888
ENSSSCG00000013420	KISS1R	turquoise	0.406101	0.149643	-0.310028	0.280708
ENSSSCG00000051788		turquoise	-0.405969	0.149788	-0.41552	0.139524
ENSSSCG00000005373	NANS	turquoise	-0.40591	0.149853	0.621501	0.0176624
ENSSSCG00000011482	CFAP20DC	turquoise	0.405718	0.150065	-0.955187	1.06124e-07
ENSSSCG00000009851		turquoise	-0.405495	0.15031	0.865511	6.354e-05
ENSSSCG00000008171	NPAS2	turquoise	0.405244	0.150587	-0.946045	3.16922e-07
ENSSSCG00000017366	HDAC5	turquoise	0.405132	0.150711	-0.921132	2.92636e-06
ENSSSCG00000040981	GMFG	turquoise	-0.40478	0.1511	0.841443	0.000161542
ENSSSCG00000045889		turquoise	-0.404388	0.151533	0.708662	0.00455147
ENSSSCG00000009164	CISD2	turquoise	-0.404314	0.151616	0.928763	1.61622e-06
ENSSSCG00000036033	THRB	turquoise	-0.404268	0.151667	0.89816	1.2891e-05
ENSSSCG00000009169	SLC39A8	turquoise	0.404104	0.151849	-0.880461	3.24053e-05
ENSSSCG00000017066	GEMIN5	turquoise	-0.404055	0.151903	0.879733	3.35529e-05
ENSSSCG00000035849	PTPRF	turquoise	0.403501	0.152519	-0.779124	0.00102198
ENSSSCG00000009746	RAN	turquoise	-0.403413	0.152617	0.881048	3.15045e-05
ENSSSCG00000049104		turquoise	0.403403	0.152628	-0.487988	0.0766846
ENSSSCG00000047711		turquoise	-0.403392	0.15264	0.552744	0.0403677
ENSSSCG00000003115	MEIS3	turquoise	-0.403235	0.152816	0.783075	0.000925606
ENSSSCG00000015362	TSPAN13	turquoise	-0.403086	0.152982	0.599141	0.0235591
ENSSSCG00000016100	NDUFB3	turquoise	-0.402929	0.153157	0.891251	1.88206e-05
ENSSSCG00000048773		turquoise	-0.402861	0.153232	-0.468403	0.0911638
ENSSSCG00000024622	ZNF667	turquoise	-0.402663	0.153454	0.577941	0.0304118
ENSSSCG00000016845	NUP155	turquoise	-0.402319	0.153839	0.684203	0.00695734
ENSSSCG00000033149	DDX47	turquoise	-0.402074	0.154113	0.944599	3.70237e-07
ENSSSCG00000009083	SPRY1	turquoise	-0.402049	0.154141	0.897302	1.35304e-05
ENSSSCG00000029711	ZNF518B	turquoise	-0.401903	0.154305	0.885134	2.57787e-05
ENSSSCG00000039157	CLASP1	turquoise	0.401873	0.154339	-0.926503	1.93959e-06
ENSSSCG00000040182	RHBDD2	turquoise	0.401363	0.154911	-0.842335	0.000156481
ENSSSCG00000012075	FAM3B	turquoise	0.401213	0.15508	-0.590288	0.0262623
ENSSSCG00000027903		turquoise	0.401136	0.155167	-0.881562	3.07313e-05
ENSSSCG00000006873	FRRS1	turquoise	-0.401095	0.155213	0.939497	6.21116e-07
ENSSSCG00000001917		turquoise	0.400978	0.155345	-0.692585	0.00604236
ENSSSCG00000049114		turquoise	-0.400464	0.155925	0.952305	1.53299e-07
ENSSSCG00000041031		turquoise	-0.400384	0.156015	0.848009	0.000127226
ENSSSCG00000028974	UST	turquoise	0.400323	0.156084	-0.911324	5.78545e-06
ENSSSCG00000013683		turquoise	-0.400281	0.156131	0.334012	0.243152
ENSSSCG00000022486	CBLB	turquoise	-0.40023	0.156189	0.943598	4.11303e-07
ENSSSCG00000019671		turquoise	-0.400138	0.156294	0.432006	0.122934
ENSSSCG00000015888	RBMS1	turquoise	-0.39977	0.15671	0.919526	3.29092e-06
ENSSSCG00000044630		turquoise	-0.399703	0.156786	0.810111	0.000443499
ENSSSCG00000003998	ZNF274	turquoise	0.399579	0.156926	-0.928496	1.6519e-06
ENSSSCG00000045162		turquoise	0.399217	0.157338	-0.551952	0.0407152
ENSSSCG00000049219		turquoise	-0.398998	0.157587	-0.277181	0.337355
ENSSSCG00000034373	TNRC6C	turquoise	0.398851	0.157753	-0.924287	2.30669e-06
ENSSSCG00000037158	MTURN	turquoise	0.398834	0.157774	-0.837419	0.000186037
ENSSSCG00000043867		turquoise	0.3988	0.157812	-0.638082	0.0140704
ENSSSCG00000028167	SLIRP	turquoise	-0.398786	0.157828	0.800712	0.000579854
ENSSSCG00000051590		turquoise	0.398739	0.157881	-0.596501	0.0243423
ENSSSCG00000040397	COLEC12	turquoise	-0.398606	0.158033	0.971442	7.36491e-09
ENSSSCG00000002640	DEF8	turquoise	0.398588	0.158053	-0.941569	5.06209e-07
ENSSSCG00000035518	TMEM265	turquoise	-0.39858	0.158062	0.813305	0.000403546
ENSSSCG00000016522	PTN	turquoise	-0.398507	0.158146	0.417486	0.137471
ENSSSCG00000024773	EID2	turquoise	0.398367	0.158306	-0.402299	0.153861
ENSSSCG00000048628		turquoise	-0.398352	0.158323	0.818872	0.000340867
ENSSSCG00000008959	CXCL2	turquoise	-0.398311	0.158369	0.381889	0.177844
ENSSSCG00000018086	ND4L	turquoise	-0.398311	0.15837	0.856459	9.20184e-05
ENSSSCG00000050989		turquoise	0.397704	0.159063	-0.195983	0.501908
ENSSSCG00000017817	PRPF8	turquoise	-0.397574	0.159212	0.88388	2.74365e-05
ENSSSCG00000032055	RO60	turquoise	-0.397528	0.159264	0.818913	0.000340439
ENSSSCG00000000199	SPATS2	turquoise	0.397336	0.159485	-0.724075	0.00340895
ENSSSCG00000003222	SYT3	turquoise	0.397178	0.159666	-0.880449	3.24246e-05
ENSSSCG00000027646	TIPARP	turquoise	0.397169	0.159677	-0.936355	8.35789e-07
ENSSSCG00000045396		turquoise	0.396804	0.160096	-0.675682	0.00799415
ENSSSCG00000017810	TLCD3A	turquoise	-0.39672	0.160192	0.557751	0.0382218
ENSSSCG00000048554		turquoise	-0.396362	0.160604	0.873427	4.49496e-05
ENSSSCG00000004803	ACTC1	turquoise	-0.396299	0.160676	0.577135	0.0306984
ENSSSCG00000013731	DNASE2	turquoise	0.395833	0.161214	-0.959145	6.147e-08
ENSSSCG00000027660	IFI44L	turquoise	0.395795	0.161258	-0.797258	0.000637675
ENSSSCG00000003000	ITPKC	turquoise	0.395614	0.161467	-0.82963	0.00024198
ENSSSCG00000006294	NME7	turquoise	-0.395413	0.161699	0.601484	0.0228802
ENSSSCG00000017865	CTNS	turquoise	0.395354	0.161768	-0.956074	9.43131e-08
ENSSSCG00000028981	ZNF367	turquoise	-0.395189	0.161959	0.638952	0.0138988
ENSSSCG00000036865	SDS	turquoise	-0.395177	0.161972	0.867966	5.72062e-05
ENSSSCG00000012631	LONRF3	turquoise	0.395154	0.161999	-0.830439	0.000235603
ENSSSCG00000034122	TMEM128	turquoise	-0.395142	0.162013	0.581295	0.0292393
ENSSSCG00000025534	CSE1L	turquoise	-0.394815	0.162392	0.858022	8.64737e-05
ENSSSCG00000030386	NUP205	turquoise	-0.394455	0.16281	0.777202	0.00107167
ENSSSCG00000036573	SPDEF	turquoise	0.394396	0.162878	-0.359582	0.206678
ENSSSCG00000028737	USP3	turquoise	-0.394332	0.162953	0.942343	4.68092e-07
ENSSSCG00000006731	VTCN1	turquoise	0.394245	0.163054	-0.903409	9.49453e-06
ENSSSCG00000017509		turquoise	-0.393968	0.163376	0.519114	0.0571417
ENSSSCG00000019644		turquoise	-0.393957	0.163389	0.585204	0.027916
ENSSSCG00000034528	TGM6	turquoise	0.393921	0.163431	-0.86998	5.24056e-05
ENSSSCG00000035058	PID1	turquoise	-0.3939	0.163456	0.685181	0.00684532
ENSSSCG00000015545	GLUL	turquoise	0.393848	0.163517	-0.94927	2.20493e-07
ENSSSCG00000025060		turquoise	-0.393842	0.163523	0.799399	0.000601312
ENSSSCG00000005060	KTN1	turquoise	-0.393263	0.1642	0.745446	0.00221165
ENSSSCG00000040202	CRLS1	turquoise	-0.393157	0.164323	0.472359	0.0880968
ENSSSCG00000033295	EIF2S1	turquoise	-0.3928	0.164741	0.896906	1.38343e-05
ENSSSCG00000001918	NPTN	turquoise	0.39278	0.164765	-0.88891	2.12743e-05
ENSSSCG00000049534		turquoise	-0.392637	0.164932	0.956866	8.47134e-08
ENSSSCG00000039904	SNORD14	turquoise	-0.392456	0.165144	0.972819	5.49065e-09
ENSSSCG00000015660	PFKFB2	turquoise	-0.392325	0.165298	0.848578	0.000124558
ENSSSCG00000007248	ASXL1	turquoise	0.392318	0.165306	-0.870929	5.02584e-05
ENSSSCG00000033526	BAG2	turquoise	-0.392303	0.165324	0.886194	2.44418e-05
ENSSSCG00000041827		turquoise	-0.392289	0.16534	0.387742	0.170734
ENSSSCG00000006083	LAPTM4B	turquoise	-0.392215	0.165427	0.956787	8.56277e-08
ENSSSCG00000006453	KIRREL1	turquoise	-0.391921	0.165773	0.899249	1.21154e-05
ENSSSCG00000001701	HSP90AB1	turquoise	-0.391811	0.165902	0.91816	3.62962e-06
ENSSSCG00000019132	U6	turquoise	-0.391314	0.166487	0.785909	0.000861085
ENSSSCG00000048564		turquoise	0.391167	0.16666	-0.843143	0.000152011
ENSSSCG00000011048	SUV39H2	turquoise	-0.391068	0.166777	0.89459	1.57257e-05
ENSSSCG00000031176	GP9	turquoise	-0.390966	0.166898	0.654785	0.0110451
ENSSSCG00000002267	RGMA	turquoise	0.39082	0.16707	-0.959404	5.91995e-08
ENSSSCG00000037771		turquoise	0.390547	0.167393	-0.699543	0.00535658
ENSSSCG00000016128	EEF1B2	turquoise	-0.390335	0.167644	0.895087	1.53028e-05
ENSSSCG00000041052		turquoise	-0.390128	0.167889	0.444262	0.111504
ENSSSCG00000017200	UNC13D	turquoise	0.390061	0.167969	-0.911474	5.72895e-06
ENSSSCG00000012083	RIPK4	turquoise	0.389859	0.168208	-0.501924	0.0674272
ENSSSCG00000041866		turquoise	0.389762	0.168323	-0.293681	0.308153
ENSSSCG00000011895	PLA1A	turquoise	-0.389733	0.168359	0.432716	0.122251
ENSSSCG00000044997		turquoise	-0.389642	0.168467	0.910418	6.13695e-06
ENSSSCG00000012288	CCDC120	turquoise	0.389631	0.16848	-0.943369	4.21226e-07
ENSSSCG00000049188		turquoise	-0.389546	0.16858	0.882744	2.90132e-05
ENSSSCG00000016746	NPC1L1	turquoise	-0.389345	0.16882	0.952938	1.41685e-07
ENSSSCG00000014033	RMND5B	turquoise	-0.388912	0.169336	0.906667	7.78409e-06
ENSSSCG00000008648	RSAD2	turquoise	-0.388878	0.169376	0.894094	1.61568e-05
ENSSSCG00000012283	ZNF81	turquoise	-0.388816	0.16945	0.470674	0.0893936
ENSSSCG00000010904	NEK7	turquoise	0.387982	0.170446	-0.896154	1.44265e-05
ENSSSCG00000001027	BMP6	turquoise	0.387964	0.170468	-0.893306	1.68617e-05
ENSSSCG00000005109	ESR2	turquoise	-0.387857	0.170596	0.457364	0.100114
ENSSSCG00000017809	GEMIN4	turquoise	-0.387657	0.170836	0.506307	0.0646883
ENSSSCG00000040961	LIF	turquoise	-0.387589	0.170918	0.948537	2.39931e-07
ENSSSCG00000017198	ACOX1	turquoise	0.38744	0.171097	-0.950684	1.8667e-07
ENSSSCG00000013767	PALM3	turquoise	-0.387183	0.171405	0.9468	2.91702e-07
ENSSSCG00000032380	C1orf53	turquoise	0.387094	0.171512	-0.917886	3.70096e-06
ENSSSCG00000038848	IL22RA1	turquoise	0.386868	0.171784	-0.866344	6.13302e-05
ENSSSCG00000006643	ANXA9	turquoise	0.386499	0.172228	-0.819673	0.000332536
ENSSSCG00000022429	KAZALD1	turquoise	0.386451	0.172287	-0.962738	3.56575e-08
ENSSSCG00000004888	SERPINB8	turquoise	-0.386273	0.172501	0.849008	0.000122568
ENSSSCG00000050128		turquoise	-0.386181	0.172612	0.938075	7.11801e-07
ENSSSCG00000016263		turquoise	0.386106	0.172702	-0.749168	0.00204255
ENSSSCG00000016949	TRAPPC13	turquoise	-0.385887	0.172967	0.45173	0.104908
ENSSSCG00000036494	ERG28	turquoise	-0.385673	0.173226	0.947899	2.57968e-07
ENSSSCG00000037098		turquoise	0.385655	0.173248	-0.539502	0.0464698
ENSSSCG00000047841		turquoise	-0.385491	0.173446	0.895345	1.5087e-05
ENSSSCG00000012434	ATRX	turquoise	-0.385455	0.17349	0.922203	2.70227e-06
ENSSSCG00000018033	UBB	turquoise	-0.38509	0.173932	0.665337	0.00940963
ENSSSCG00000009951	SGSM1	turquoise	-0.384984	0.174061	0.947769	2.61794e-07
ENSSSCG00000013426	PWWP3A	turquoise	0.384864	0.174206	-0.912021	5.52646e-06
ENSSSCG00000042176		turquoise	-0.38459	0.174539	0.798067	0.000623742
ENSSSCG00000042384		turquoise	-0.384559	0.174578	0.865196	6.43931e-05
ENSSSCG00000035684	TMED10	turquoise	-0.38452	0.174625	0.607711	0.0211468
ENSSSCG00000016929	PDE4D	turquoise	-0.384515	0.174631	0.939471	6.22667e-07
ENSSSCG00000040638	DIO2	turquoise	0.384272	0.174927	-0.810563	0.000437658
ENSSSCG00000002918		turquoise	-0.38419	0.175027	0.455514	0.101671
ENSSSCG00000017592	MBTD1	turquoise	-0.384003	0.175255	0.532419	0.049997
ENSSSCG00000041996		turquoise	0.383845	0.175448	-0.650654	0.0117417
ENSSSCG00000021612	ARHGAP28	turquoise	0.383796	0.175506	-0.778946	0.0010265
ENSSSCG00000006187	MSC	turquoise	0.383606	0.175739	-0.816281	0.000368988
ENSSSCG00000031488	ARHGAP17	turquoise	0.383524	0.175839	-0.703639	0.0049822
ENSSSCG00000034090	CRTC3	turquoise	0.38347	0.175905	-0.90201	1.0318e-05
ENSSSCG00000025097	TMEM61	turquoise	-0.383459	0.175918	0.933648	1.06671e-06
ENSSSCG00000006917	LRRC8C	turquoise	-0.38342	0.175966	0.952264	1.5408e-07
ENSSSCG00000025126	LGI4	turquoise	0.383146	0.176301	-0.565117	0.0352187
ENSSSCG00000008094	CHCHD5	turquoise	0.383077	0.176385	0.476188	0.0851976
ENSSSCG00000003112		turquoise	0.382984	0.1765	-0.570546	0.0331198
ENSSSCG00000025754	ZGLP1	turquoise	-0.382948	0.176544	-0.360975	0.204796
ENSSSCG00000048009		turquoise	-0.382709	0.176836	0.967077	1.71254e-08
ENSSSCG00000032562	TMC6	turquoise	-0.382568	0.17701	0.56378	0.0357501
ENSSSCG00000042417		turquoise	0.382019	0.177684	-0.893508	1.66792e-05
ENSSSCG00000001771	RASGRF1	turquoise	-0.381862	0.177878	0.741554	0.00240015
ENSSSCG00000015105	SLC37A4	turquoise	-0.381728	0.178042	0.875214	4.14405e-05
ENSSSCG00000040714	RSPH6A	turquoise	0.381685	0.178095	-0.523795	0.0545492
ENSSSCG00000001061	JARID2	turquoise	-0.381342	0.178518	0.885155	2.57526e-05
ENSSSCG00000005454	TXNDC8	turquoise	0.381172	0.178728	-0.366697	0.19718
ENSSSCG00000038637		turquoise	-0.381048	0.178881	0.883321	2.8204e-05
ENSSSCG00000010929	CYB5R1	turquoise	0.381017	0.178919	-0.888035	2.22559e-05
ENSSSCG00000003551	PAQR7	turquoise	0.380918	0.179042	-0.792052	0.000733507
ENSSSCG00000038626	ZNF513	turquoise	0.380905	0.179058	-0.922258	2.69121e-06
ENSSSCG00000023186	CA4	turquoise	-0.380771	0.179224	0.925674	2.07082e-06
ENSSSCG00000036168	PDSS2	turquoise	-0.380675	0.179342	0.881675	3.0564e-05
ENSSSCG00000028905	TNIK	turquoise	0.380474	0.179592	-0.781492	0.000963313
ENSSSCG00000008098	POLR1B	turquoise	-0.380422	0.179656	0.920349	3.09985e-06
ENSSSCG00000034137	PPIB	turquoise	0.380364	0.179727	0.59486	0.0248387
ENSSSCG00000034776	TAFA5	turquoise	0.380236	0.179886	-0.940983	5.36782e-07
ENSSSCG00000029600		turquoise	0.379719	0.180527	-0.842491	0.000155613
ENSSSCG00000011205	EFHB	turquoise	-0.379616	0.180656	-0.311074	0.279002
ENSSSCG00000004663	SEMA6D	turquoise	-0.379243	0.18112	0.965638	2.20685e-08
ENSSSCG00000032165	ATP5MK	turquoise	-0.37919	0.181186	0.857683	8.76514e-05
ENSSSCG00000008555		turquoise	-0.378836	0.181628	0.486301	0.0778627
ENSSSCG00000040779		turquoise	0.378751	0.181733	-0.894965	1.54056e-05
ENSSSCG00000027667	EML1	turquoise	0.37873	0.18176	-0.957028	8.28501e-08
ENSSSCG00000023325		turquoise	-0.37852	0.182022	0.845615	0.000138973
ENSSSCG00000003553	MTFR1L	turquoise	0.378507	0.182038	-0.886316	2.42926e-05
ENSSSCG00000047845		turquoise	-0.378503	0.182043	-0.314613	0.273278
ENSSSCG00000029343	MFSD11	turquoise	0.378434	0.182129	-0.670531	0.00867663
ENSSSCG00000029160		turquoise	-0.378166	0.182465	0.92874	1.61923e-06
ENSSSCG00000015714	CCDC93	turquoise	0.378163	0.182469	-0.8918	1.82798e-05
ENSSSCG00000005506	MEGF9	turquoise	0.378041	0.18262	-0.929833	1.47937e-06
ENSSSCG00000000457	USP15	turquoise	-0.378039	0.182623	0.96714	1.69323e-08
ENSSSCG00000049427		turquoise	0.377916	0.182777	-0.777356	0.00106764
ENSSSCG00000017917	MINK1	turquoise	0.377883	0.182818	-0.954651	1.13847e-07
ENSSSCG00000012002	ROBO2	turquoise	0.377651	0.183109	-0.841127	0.000163364
ENSSSCG00000041160		turquoise	-0.37761	0.183161	-0.563079	0.0360312
ENSSSCG00000021176	LPXN	turquoise	-0.37757	0.183211	-0.255639	0.377709
ENSSSCG00000039365		turquoise	-0.377538	0.183252	0.712764	0.00422185
ENSSSCG00000014161	KIAA0825	turquoise	-0.377464	0.183344	0.654618	0.0110726
ENSSSCG00000003336		turquoise	0.377416	0.183404	-0.757359	0.00170643
ENSSSCG00000046436		turquoise	-0.377388	0.18344	0.462101	0.0962018
ENSSSCG00000036973	RAC3	turquoise	0.376756	0.184234	-0.82855	0.000250706
ENSSSCG00000024841	SLC35A2	turquoise	0.376704	0.184299	-0.74825	0.00208329
ENSSSCG00000011629	ACAD11	turquoise	0.376268	0.18485	-0.684151	0.00696323
ENSSSCG00000000590	PLCZ1	turquoise	-0.376115	0.185042	0.801521	0.000566939
ENSSSCG00000034282	ABCA12	turquoise	0.375936	0.185268	-0.909765	6.40114e-06
ENSSSCG00000022031	CHST2	turquoise	-0.375885	0.185334	0.946492	3.01788e-07
ENSSSCG00000033624	SRGAP3	turquoise	-0.375846	0.185383	0.952367	1.52126e-07
ENSSSCG00000032149	PLET1	turquoise	0.375604	0.185689	-0.963645	3.08183e-08
ENSSSCG00000023994	ARMC9	turquoise	-0.37552	0.185795	0.811519	0.000425507
ENSSSCG00000037096	TMEM88	turquoise	0.375224	0.18617	-0.853897	0.000101731
ENSSSCG00000004989	FBXO33	turquoise	-0.375129	0.186291	0.740037	0.00247695
ENSSSCG00000025901	LCLAT1	turquoise	-0.374963	0.186501	0.915912	4.24944e-06
ENSSSCG00000047934		turquoise	-0.374915	0.186561	0.671932	0.00848672
ENSSSCG00000013659	DNMT1	turquoise	-0.374897	0.186585	0.850943	0.000113941
ENSSSCG00000002831	IRX3	turquoise	0.37475	0.186772	-0.976744	2.17239e-09
ENSSSCG00000004016		turquoise	0.37456	0.187012	-0.433349	0.121644
ENSSSCG00000027280	SNORD99	turquoise	-0.374395	0.187222	0.78001	0.000999713
ENSSSCG00000025107	MIX23	turquoise	-0.374047	0.187666	0.887836	2.24839e-05
ENSSSCG00000042612		turquoise	-0.373408	0.188481	0.683007	0.00709615
ENSSSCG00000010182	CAPN9	turquoise	-0.373408	0.188481	0.683007	0.00709615
ENSSSCG00000025099	U6	turquoise	-0.373408	0.188481	0.683007	0.00709615
ENSSSCG00000017673	INTS2	turquoise	-0.373318	0.188596	0.44817	0.108018
ENSSSCG00000003805	PDE4B	turquoise	-0.373207	0.188738	0.900699	1.1142e-05
ENSSSCG00000046904		turquoise	-0.373206	0.188739	0.87405	4.37002e-05
ENSSSCG00000002718	FA2H	turquoise	0.373157	0.188802	-0.924809	2.21539e-06
ENSSSCG00000015294		turquoise	-0.372902	0.189129	-0.629308	0.0158936
ENSSSCG00000031735		turquoise	0.372836	0.189212	-0.433746	0.121264
ENSSSCG00000006997	TRIML2	turquoise	0.37262	0.18949	0.295356	0.305272
ENSSSCG00000008484	SRSF7	turquoise	-0.372617	0.189493	0.911048	5.89083e-06
ENSSSCG00000000080	GRAP2	turquoise	-0.372369	0.189811	0.361067	0.204671
ENSSSCG00000009241	COPS4	turquoise	-0.372082	0.19018	0.848064	0.000126967
ENSSSCG00000006830	PSMA5	turquoise	-0.371905	0.190407	0.813103	0.000405981
ENSSSCG00000006029	NUDCD1	turquoise	-0.371749	0.190608	0.883618	2.77942e-05
ENSSSCG00000014116	MTX3	turquoise	0.37165	0.190735	-0.847247	0.000130876
ENSSSCG00000036702	ACTN1	turquoise	0.371568	0.190842	-0.945426	3.38896e-07
ENSSSCG00000002507	BCL11B	turquoise	0.37154	0.190878	-0.686681	0.00667636
ENSSSCG00000010226	JMJD1C	turquoise	-0.371513	0.190912	0.906845	7.69883e-06
ENSSSCG00000022178	NUMB	turquoise	0.371446	0.190999	-0.923909	2.37467e-06
ENSSSCG00000028877	RAD51B	turquoise	-0.371434	0.191013	0.735514	0.00271753
ENSSSCG00000049725		turquoise	0.371288	0.191202	-0.209142	0.473018
ENSSSCG00000049831		turquoise	-0.371232	0.191274	0.631981	0.0153201
ENSSSCG00000008316	NAGK	turquoise	0.371177	0.191345	-0.944325	3.81142e-07
ENSSSCG00000045831		turquoise	0.370999	0.191574	-0.878699	3.52395e-05
ENSSSCG00000000406	PTGES3	turquoise	-0.370934	0.191659	0.886022	2.4655e-05
ENSSSCG00000031988	MYOCD	turquoise	-0.370791	0.191844	0.847797	0.000128232
ENSSSCG00000009817	P2RX7	turquoise	0.370765	0.191878	-0.832918	0.000216911
ENSSSCG00000002316	COX16	turquoise	-0.370667	0.192004	0.31885	0.266518
ENSSSCG00000038031	CPSF6	turquoise	0.370568	0.192131	-0.769025	0.0013051
ENSSSCG00000035875	OS9	turquoise	0.370418	0.192326	-0.717898	0.00383593
ENSSSCG00000040147	SHISA3	turquoise	-0.370393	0.192359	0.702464	0.00508744
ENSSSCG00000001074	KDM1B	turquoise	-0.370368	0.192391	0.880837	3.18259e-05
ENSSSCG00000010685	TIAL1	turquoise	-0.370306	0.19247	0.490889	0.0746872
ENSSSCG00000007253	MAPRE1	turquoise	0.370107	0.192729	-0.892654	1.74641e-05
ENSSSCG00000007423		turquoise	-0.37009	0.19275	0.591303	0.0259412
ENSSSCG00000046419		turquoise	0.36988	0.193024	-0.863587	6.8893e-05
ENSSSCG00000031713	MACROH2A2	turquoise	-0.36956	0.193439	0.590444	0.0262129
ENSSSCG00000011114	SEC61A2	turquoise	0.369378	0.193675	-0.572349	0.0324435
ENSSSCG00000030013		turquoise	0.369359	0.1937	-0.591471	0.0258883
ENSSSCG00000039990		turquoise	-0.369306	0.193769	0.735334	0.00272751
ENSSSCG00000011160	ADARB2	turquoise	0.369221	0.193879	-0.730129	0.00302769
ENSSSCG00000014298	PPP2CA	turquoise	-0.369185	0.193926	0.934637	9.76902e-07
ENSSSCG00000011800	FETUB	turquoise	0.368924	0.194266	-0.967229	1.66622e-08
ENSSSCG00000014577	TMEM9B	turquoise	-0.368821	0.194399	0.655405	0.0109433
ENSSSCG00000002815	ADGRG1	turquoise	0.368744	0.194501	-0.89623	1.43661e-05
ENSSSCG00000040188	TNFSF12	turquoise	0.368743	0.194502	-0.599793	0.0233686
ENSSSCG00000005043	DDHD1	turquoise	-0.368462	0.194868	0.75041	0.00198848
ENSSSCG00000008990		turquoise	-0.368439	0.194898	0.942282	4.70998e-07
ENSSSCG00000022998	PKIG	turquoise	-0.368434	0.194905	0.933865	1.04647e-06
ENSSSCG00000014988	MMP13	turquoise	0.368323	0.195049	-0.903896	9.22112e-06
ENSSSCG00000002921	CLIP3	turquoise	-0.368138	0.195291	0.872086	4.77394e-05
ENSSSCG00000025363	SNX17	turquoise	0.368138	0.195291	-0.914455	4.69555e-06
ENSSSCG00000036552		turquoise	-0.367675	0.195897	0.503508	0.0664278
ENSSSCG00000038487	TMPO	turquoise	-0.367533	0.196082	0.785717	0.000865324
ENSSSCG00000004901	PIGN	turquoise	-0.367523	0.196097	0.789855	0.000777267
ENSSSCG00000036138		turquoise	-0.367516	0.196105	0.880033	3.30767e-05
ENSSSCG00000004705	MAP1A	turquoise	-0.367245	0.19646	0.791477	0.000744774
ENSSSCG00000000591	PIK3C2G	turquoise	0.367077	0.196682	-0.889999	2.0102e-05
ENSSSCG00000010967	CCL27	turquoise	0.366831	0.197004	-0.478986	0.0831218
ENSSSCG00000000696	NOP2	turquoise	-0.366703	0.197172	0.72166	0.00357121
ENSSSCG00000013602	HNRNPM	turquoise	-0.366665	0.197223	0.568337	0.0339623
ENSSSCG00000006496	LMNA	turquoise	0.366654	0.197237	-0.920043	3.16974e-06
ENSSSCG00000032170	DAPK3	turquoise	0.366513	0.197422	-0.893826	1.63934e-05
ENSSSCG00000011059		turquoise	-0.366236	0.197787	0.96612	2.02978e-08
ENSSSCG00000008624	LPIN1	turquoise	-0.366054	0.198027	0.962769	3.54843e-08
ENSSSCG00000041289	IL10RB	turquoise	0.365687	0.198511	-0.941274	5.21411e-07
ENSSSCG00000017422	FKBP10	turquoise	-0.365593	0.198635	0.893803	1.64143e-05
ENSSSCG00000020533	SNORA2C	turquoise	-0.365553	0.198689	0.690141	0.00629878
ENSSSCG00000017164		turquoise	0.365516	0.198737	-0.934489	9.89943e-07
ENSSSCG00000037950	NIPAL1	turquoise	-0.365479	0.198786	0.838492	0.000179228
ENSSSCG00000032613	SNAI1	turquoise	-0.365246	0.199095	0.902481	1.00345e-05
ENSSSCG00000045846		turquoise	-0.365036	0.199373	0.928055	1.71229e-06
ENSSSCG00000012862	OSBPL5	turquoise	0.364975	0.199454	-0.95225	1.54329e-07
ENSSSCG00000008188	MGAT4A	turquoise	0.364883	0.199575	-0.885411	2.54245e-05
ENSSSCG00000042492		turquoise	0.364488	0.200099	-0.538448	0.046983
ENSSSCG00000047882		turquoise	-0.364459	0.200137	0.794292	0.000690949
ENSSSCG00000019663	ssc-mir-29c	turquoise	0.364428	0.200178	-0.605473	0.0217581
ENSSSCG00000000281	HOXC12	turquoise	0.364347	0.200286	-0.48063	0.0819184
ENSSSCG00000051581		turquoise	-0.364225	0.200448	-0.585639	0.0277717
ENSSSCG00000015073	TAGLN	turquoise	0.363966	0.200792	-0.902347	1.01143e-05
ENSSSCG00000005620	SH2D3C	turquoise	-0.363268	0.201722	0.920918	2.97307e-06
ENSSSCG00000045333		turquoise	-0.363137	0.201896	0.930573	1.39041e-06
ENSSSCG00000036747	WAS	turquoise	0.3627	0.20248	-0.581742	0.0290858
ENSSSCG00000013016	PPP2R5B	turquoise	-0.362691	0.202493	0.815536	0.000377408
ENSSSCG00000051624		turquoise	-0.362423	0.202851	0.50885	0.0631358
ENSSSCG00000011499	LRIG1	turquoise	0.362215	0.20313	-0.973397	4.83287e-09
ENSSSCG00000005288	TLE4	turquoise	-0.362056	0.203343	0.931058	1.33461e-06
ENSSSCG00000041715		turquoise	-0.361838	0.203636	-0.380609	0.179424
ENSSSCG00000016737		turquoise	-0.361837	0.203637	0.893163	1.69926e-05
ENSSSCG00000042024		turquoise	-0.361636	0.203907	0.635515	0.0145865
ENSSSCG00000038530	TMEM240	turquoise	0.361532	0.204047	-0.70126	0.00519707
ENSSSCG00000009134	EGF	turquoise	0.361381	0.204249	-0.364852	0.199616
ENSSSCG00000009115	NDST3	turquoise	-0.361336	0.20431	0.905197	8.52151e-06
ENSSSCG00000037185		turquoise	0.361299	0.20436	-0.907996	7.16361e-06
ENSSSCG00000010025	LIMK2	turquoise	0.36119	0.204507	-0.917482	3.8083e-06
ENSSSCG00000023084	ATP2B2	turquoise	0.361067	0.204672	-0.937781	7.31811e-07
ENSSSCG00000027846	RRP15	turquoise	-0.360938	0.204846	0.90814	7.09903e-06
ENSSSCG00000046504		turquoise	-0.360851	0.204963	0.502479	0.0670759
ENSSSCG00000017877	ANKFY1	turquoise	-0.360693	0.205176	0.985441	1.33254e-10
ENSSSCG00000008889	NPY5R	turquoise	-0.360455	0.205498	0.871884	4.81728e-05
ENSSSCG00000032761		turquoise	0.360155	0.205902	0.303223	0.291952
ENSSSCG00000012773	PNCK	turquoise	0.360019	0.206087	-0.853409	0.000103669
ENSSSCG00000029760	CIPC	turquoise	0.36001	0.206099	-0.836148	0.000194368
ENSSSCG00000011415	MAPKAPK3	turquoise	0.359972	0.206149	-0.920394	3.08963e-06
ENSSSCG00000010968		turquoise	0.359849	0.206316	-0.456844	0.10055
ENSSSCG00000005858	RNF208	turquoise	0.359801	0.206381	-0.471577	0.0886972
ENSSSCG00000004150		turquoise	0.359716	0.206496	-0.813704	0.000398769
ENSSSCG00000011970	CMSS1	turquoise	-0.359679	0.206546	0.976083	2.56673e-09
ENSSSCG00000043852		turquoise	0.359657	0.206576	-0.610948	0.020286
ENSSSCG00000012394	GJB1	turquoise	0.359551	0.20672	-0.808183	0.000469109
ENSSSCG00000025294	AIRE	turquoise	-0.359508	0.206778	0.536038	0.0481712
ENSSSCG00000009228	MAPK10	turquoise	0.359435	0.206876	-0.975121	3.24536e-09
ENSSSCG00000008619	DDX1	turquoise	-0.359388	0.206941	0.885688	2.5073e-05
ENSSSCG00000010331	ANXA11	turquoise	0.359371	0.206964	-0.715525	0.00401073
ENSSSCG00000025647	SLC35C1	turquoise	0.359272	0.207098	-0.657438	0.0106148
ENSSSCG00000001746	PKHD1	turquoise	0.359158	0.207252	-0.875026	4.17991e-05
ENSSSCG00000011400	SEMA3B	turquoise	-0.359132	0.207288	0.425257	0.129555
ENSSSCG00000027573	RPL29	turquoise	-0.359028	0.207429	0.843505	0.000150044
ENSSSCG00000002041	SLC7A7	turquoise	-0.359017	0.207444	0.736139	0.00268326
ENSSSCG00000036114		turquoise	-0.358919	0.207577	0.916804	3.99375e-06
ENSSSCG00000029385	LIAS	turquoise	-0.358798	0.207741	0.883907	2.74004e-05
ENSSSCG00000034335		turquoise	-0.35877	0.207779	0.87586	4.02291e-05
ENSSSCG00000027098		turquoise	0.358743	0.207817	-0.958577	6.66937e-08
ENSSSCG00000045069		turquoise	-0.358477	0.208178	0.963825	2.99247e-08
ENSSSCG00000051098		turquoise	-0.358405	0.208276	0.915207	4.46058e-06
ENSSSCG00000034113		turquoise	-0.358297	0.208423	0.338715	0.236167
ENSSSCG00000031789	ACSL5	turquoise	0.35818	0.208582	-0.440135	0.115268
ENSSSCG00000046372		turquoise	0.358055	0.208752	-0.647029	0.0123802
ENSSSCG00000035048	C1QBP	turquoise	-0.3579	0.208965	0.802894	0.00054554
ENSSSCG00000014060	KIAA1191	turquoise	0.357827	0.209063	-0.920571	3.04984e-06
ENSSSCG00000030478	MRPL42	turquoise	-0.357606	0.209365	0.936701	8.09517e-07
ENSSSCG00000009322	SLC46A3	turquoise	0.357588	0.20939	-0.915517	4.36673e-06
ENSSSCG00000035390	C2orf49	turquoise	-0.357427	0.20961	0.500612	0.0682624
ENSSSCG00000045248		turquoise	-0.357272	0.209821	0.658612	0.0104285
ENSSSCG00000021255	ADA	turquoise	-0.357107	0.210048	0.917771	3.73132e-06
ENSSSCG00000039258	KICS2	turquoise	-0.357009	0.210182	0.892833	1.72968e-05
ENSSSCG00000035621	GABRB1	turquoise	-0.356816	0.210446	0.872791	4.62563e-05
ENSSSCG00000017514	KPNB1	turquoise	-0.356811	0.210452	0.756856	0.00172572
ENSSSCG00000040208	PAG1	turquoise	-0.35672	0.210577	0.916694	4.02454e-06
ENSSSCG00000041733		turquoise	-0.356711	0.21059	0.938749	6.67508e-07
ENSSSCG00000043760		turquoise	-0.356569	0.210784	0.540826	0.0458314
ENSSSCG00000039063	ssc-mir-9840	turquoise	-0.356507	0.210869	0.947906	2.57772e-07
ENSSSCG00000015933	FASTKD1	turquoise	-0.356117	0.211405	0.875507	4.08876e-05
ENSSSCG00000023992	CEP112	turquoise	0.356029	0.211525	-0.62708	0.0163842
ENSSSCG00000008036	SYNGR3	turquoise	0.355991	0.211578	-0.834315	0.000206909
ENSSSCG00000032275	MRPS30	turquoise	-0.35567	0.21202	0.933062	1.12304e-06
ENSSSCG00000001571	MTCH1	turquoise	0.355567	0.212161	-0.911831	5.59597e-06
ENSSSCG00000038958	DNM3	turquoise	0.355501	0.212252	-0.700311	0.00528479
ENSSSCG00000020846	SCARA3	turquoise	0.355115	0.212785	-0.984506	1.93174e-10
ENSSSCG00000003754		turquoise	0.355053	0.21287	-0.93215	1.21563e-06
ENSSSCG00000004614	UNC13C	turquoise	-0.354942	0.213023	0.955557	1.01057e-07
ENSSSCG00000017403	STAT3	turquoise	0.354636	0.213447	-0.953429	1.33186e-07
ENSSSCG00000029518	RIOK3	turquoise	-0.354549	0.213566	0.586966	0.0273342
ENSSSCG00000012491	CENPI	turquoise	-0.354539	0.213581	0.840381	0.000167732
ENSSSCG00000009079	INTU	turquoise	-0.354534	0.213587	0.560361	0.0371368
ENSSSCG00000009924	ANKRD13A	turquoise	-0.35436	0.213828	0.711545	0.00431777
ENSSSCG00000000119	EIF3L	turquoise	-0.35415	0.214119	0.844396	0.000145283
ENSSSCG00000033443	DEPDC1	turquoise	-0.354027	0.21429	0.862422	7.23066e-05
ENSSSCG00000015277	SOX13	turquoise	0.353979	0.214356	-0.977418	1.82386e-09
ENSSSCG00000021436	DFFB	turquoise	-0.353965	0.214375	0.291954	0.311139
ENSSSCG00000016725	TNS3	turquoise	-0.353881	0.214491	0.770145	0.00127094
ENSSSCG00000015001	SLC35F2	turquoise	-0.353727	0.214705	0.420312	0.134556
ENSSSCG00000026473	ABCA8	turquoise	0.353714	0.214723	-0.723877	0.00342201
ENSSSCG00000023215	MAOB	turquoise	-0.353381	0.215185	0.816199	0.000369908
ENSSSCG00000024463	PJA1	turquoise	-0.352947	0.21579	0.929499	1.52102e-06
ENSSSCG00000036488	KLF3	turquoise	0.352697	0.216137	-0.865953	6.23581e-05
ENSSSCG00000012371	AR	turquoise	0.352596	0.216279	-0.878131	3.61945e-05
ENSSSCG00000001887	SCAMP5	turquoise	0.352539	0.216357	-0.935119	9.35483e-07
ENSSSCG00000026137	BPIFB3	turquoise	-0.352518	0.216387	0.708528	0.00456259
ENSSSCG00000032999	FXN	turquoise	-0.352289	0.216707	0.875969	4.00274e-05
ENSSSCG00000005762	KCNT1	turquoise	-0.35222	0.216802	0.864716	6.57078e-05
ENSSSCG00000000862	GNPTAB	turquoise	0.3522	0.21683	-0.97028	9.33134e-09
ENSSSCG00000008553	PREB	turquoise	-0.352103	0.216965	0.542764	0.0449081
ENSSSCG00000009943	SSH1	turquoise	0.351979	0.217139	-0.406899	0.148767
ENSSSCG00000050502		turquoise	-0.351909	0.217237	-0.56137	0.0367236
ENSSSCG00000039769	SPIRE1	turquoise	0.351691	0.217541	-0.71095	0.00436521
ENSSSCG00000018052	NT5M	turquoise	0.351575	0.217705	-0.423584	0.131233
ENSSSCG00000016061	MYO1B	turquoise	0.351277	0.218121	-0.888121	2.21572e-05
ENSSSCG00000007007	IDO1	turquoise	0.351271	0.218129	-0.57338	0.0320614
ENSSSCG00000007723	RCC1L	turquoise	-0.351138	0.218316	0.796423	0.000652344
ENSSSCG00000030337	NYAP1	turquoise	0.351111	0.218354	-0.843406	0.000150578
ENSSSCG00000011793	LIPH	turquoise	-0.350637	0.219019	0.969321	1.12667e-08
ENSSSCG00000014395	PCDH12	turquoise	-0.350596	0.219077	0.878624	3.53636e-05
ENSSSCG00000044954		turquoise	0.350555	0.219134	-0.842493	0.000155599
ENSSSCG00000010329	ZMIZ1	turquoise	0.350237	0.219582	-0.956196	9.27768e-08
ENSSSCG00000039614		turquoise	-0.350179	0.219663	0.532086	0.0501675
ENSSSCG00000013304	NAT10	turquoise	-0.349683	0.220362	0.878425	3.56981e-05
ENSSSCG00000042878		turquoise	-0.349675	0.220374	0.981902	4.87877e-10
ENSSSCG00000025323	SF3B3	turquoise	-0.349643	0.220419	0.911934	5.55827e-06
ENSSSCG00000014217	FEM1C	turquoise	-0.349592	0.22049	0.899065	1.22433e-05
ENSSSCG00000015212	FEZ1	turquoise	0.349588	0.220496	-0.922422	2.65824e-06
ENSSSCG00000010314	AP3M1	turquoise	-0.349543	0.220559	0.871806	4.83397e-05
ENSSSCG00000007056	PLCB1	turquoise	0.349089	0.2212	-0.893199	1.69598e-05
ENSSSCG00000012310	BMP15	turquoise	-0.349063	0.221237	0.803651	0.000534028
ENSSSCG00000039370		turquoise	-0.349062	0.221239	0.549466	0.0418201
ENSSSCG00000013884	MAP1S	turquoise	0.348849	0.22154	-0.32419	0.25814
ENSSSCG00000028674		turquoise	-0.348725	0.221716	0.651297	0.011631
ENSSSCG00000027270		turquoise	-0.348687	0.22177	0.629366	0.0158811
ENSSSCG00000049543		turquoise	-0.348683	0.221775	0.897396	1.34595e-05
ENSSSCG00000007642		turquoise	0.348655	0.221814	-0.74802	0.00209356
ENSSSCG00000047270		turquoise	0.348541	0.221977	-0.962808	3.52629e-08
ENSSSCG00000006936	ODF2L	turquoise	-0.348508	0.222022	0.876903	3.83333e-05
ENSSSCG00000045270		turquoise	0.348447	0.222109	-0.869924	5.25341e-05
ENSSSCG00000012686	MOSPD1	turquoise	-0.348379	0.222206	0.907201	7.52986e-06
ENSSSCG00000044108	FXYD4	turquoise	-0.348202	0.222456	0.388154	0.170241
ENSSSCG00000032196		turquoise	0.348194	0.222467	-0.929056	1.57769e-06
ENSSSCG00000036157	BARX2	turquoise	0.348141	0.222543	-0.965781	2.15309e-08
ENSSSCG00000013869		turquoise	-0.348064	0.222653	0.933093	1.12e-06
ENSSSCG00000042378		turquoise	0.34792	0.222857	-0.602802	0.0225046
ENSSSCG00000002969		turquoise	-0.34773	0.223127	-0.410722	0.14462
ENSSSCG00000051410		turquoise	-0.347688	0.223187	0.533255	0.0495706
ENSSSCG00000014852	ARRB1	turquoise	0.347615	0.22329	-0.917441	3.81929e-06
ENSSSCG00000037645		turquoise	-0.347471	0.223494	0.952082	1.57571e-07
ENSSSCG00000036549	DPYSL3	turquoise	0.347368	0.223641	-0.970561	8.82082e-09
ENSSSCG00000008239	CAPG	turquoise	0.347312	0.223722	-0.893766	1.64473e-05
ENSSSCG00000001553	LHFPL5	turquoise	0.347299	0.223739	-0.553005	0.0402539
ENSSSCG00000030295	NUTF2	turquoise	-0.347289	0.223754	0.751738	0.0019319
ENSSSCG00000010214	CDK1	turquoise	-0.3472	0.223881	0.941992	4.85055e-07
ENSSSCG00000031680	GGPS1	turquoise	-0.347067	0.22407	0.879989	3.31463e-05
ENSSSCG00000002540	PPP2R5C	turquoise	-0.346781	0.224478	0.933773	1.055e-06
ENSSSCG00000038853	GPR137B	turquoise	0.346511	0.224864	-0.96197	4.02368e-08
ENSSSCG00000047877		turquoise	-0.346121	0.22542	0.505531	0.0651672
ENSSSCG00000047480		turquoise	0.345827	0.225842	-0.620686	0.0178555
ENSSSCG00000024867	ISG20	turquoise	0.345808	0.225869	-0.619739	0.0180816
ENSSSCG00000045866		turquoise	-0.345325	0.226561	0.789222	0.000790245
ENSSSCG00000017222	OTOP2	turquoise	0.345233	0.226694	-0.829601	0.000242212
ENSSSCG00000010259	TYSND1	turquoise	-0.345176	0.226774	0.563723	0.0357729
ENSSSCG00000011888	GPR156	turquoise	-0.345078	0.226915	0.943598	4.1132e-07
ENSSSCG00000027002	KLHL32	turquoise	-0.344699	0.22746	0.559584	0.0374573
ENSSSCG00000003712	OSBPL1A	turquoise	-0.344675	0.227494	0.900244	1.14402e-05
ENSSSCG00000032446	C1orf116	turquoise	-0.34462	0.227574	0.872779	4.62811e-05
ENSSSCG00000006344		turquoise	-0.344596	0.227608	0.862048	7.34336e-05
ENSSSCG00000005177	SH3GL2	turquoise	-0.34451	0.227732	0.94118	5.26311e-07
ENSSSCG00000051300		turquoise	-0.344152	0.228247	0.895434	1.50133e-05
ENSSSCG00000006639	C1orf56	turquoise	0.344147	0.228255	-0.922943	2.55587e-06
ENSSSCG00000020743	RABGAP1	turquoise	-0.344141	0.228264	0.91418	4.784e-06
ENSSSCG00000033005		turquoise	-0.343938	0.228556	0.452082	0.104604
ENSSSCG00000007950	ADCY9	turquoise	0.343902	0.228609	-0.938904	6.57686e-07
ENSSSCG00000016331	RAMP1	turquoise	0.343739	0.228844	-0.410529	0.144827
ENSSSCG00000046127		turquoise	-0.343529	0.229147	0.823381	0.000296082
ENSSSCG00000015496	CENPL	turquoise	-0.343444	0.22927	0.82608	0.000271629
ENSSSCG00000031091		turquoise	-0.343291	0.22949	0.877546	3.7201e-05
ENSSSCG00000026386	SLC30A2	turquoise	-0.343126	0.22973	0.693393	0.00595942
ENSSSCG00000004487	MTO1	turquoise	-0.342968	0.229958	0.884545	2.65475e-05
ENSSSCG00000047079		turquoise	-0.342918	0.230031	0.778979	0.00102567
ENSSSCG00000024635	SPART	turquoise	0.342895	0.230065	-0.702139	0.00511689
ENSSSCG00000018574	SNORD70B	turquoise	-0.342894	0.230066	0.577581	0.0305398
ENSSSCG00000006578	S100A4	turquoise	-0.342825	0.230165	0.437772	0.117461
ENSSSCG00000051282		turquoise	0.342757	0.230264	0.314281	0.273813
ENSSSCG00000035452	HTD2	turquoise	-0.342664	0.230398	0.885142	2.57687e-05
ENSSSCG00000046519		turquoise	0.342573	0.23053	-0.635466	0.0145963
ENSSSCG00000034124	CIAO2A	turquoise	-0.342422	0.23075	0.356721	0.210576
ENSSSCG00000006642	MINDY1	turquoise	0.34241	0.230767	-0.818314	0.000346775
ENSSSCG00000030565	GRIA4	turquoise	-0.342102	0.231215	0.536677	0.0478538
ENSSSCG00000015492	DARS2	turquoise	-0.341839	0.231597	0.896057	1.45044e-05
ENSSSCG00000000405		turquoise	-0.34179	0.231668	0.784481	0.000893132
ENSSSCG00000016663	DPY19L2	turquoise	0.341525	0.232053	-0.577956	0.0304065
ENSSSCG00000003098	PPP5C	turquoise	0.341422	0.232204	-0.929422	1.53071e-06
ENSSSCG00000034519	SERPINB13	turquoise	-0.341421	0.232205	0.952359	1.52265e-07
ENSSSCG00000034393		turquoise	-0.341176	0.232562	0.774282	0.00115086
ENSSSCG00000006969	TRMT9B	turquoise	-0.341025	0.232783	0.91903	3.41088e-06
ENSSSCG00000024028	STARD3NL	turquoise	0.340991	0.232832	0.572464	0.0324007
ENSSSCG00000031889		turquoise	0.340954	0.232886	-0.66089	0.0100743
ENSSSCG00000009962	TFIP11	turquoise	0.340266	0.233891	-0.780356	0.000991129
ENSSSCG00000016753	POLD2	turquoise	0.340117	0.234109	-0.708526	0.00456276
ENSSSCG00000049117		turquoise	-0.339948	0.234357	0.955504	1.01775e-07
ENSSSCG00000045723		turquoise	-0.3397	0.23472	0.597234	0.0241228
ENSSSCG00000032803	CYP2S1	turquoise	-0.339168	0.235501	0.956524	8.87537e-08
ENSSSCG00000008803	ATP8A1	turquoise	0.338991	0.235761	-0.972994	5.28393e-09
ENSSSCG00000005058	ATG14	turquoise	-0.338682	0.236217	0.609333	0.0207121
ENSSSCG00000003483	PADI4	turquoise	-0.338675	0.236226	0.954953	1.09448e-07
ENSSSCG00000010143	MTR	turquoise	-0.338656	0.236254	0.773616	0.00116956
ENSSSCG00000047840		turquoise	-0.338442	0.236569	-0.476349	0.0850767
ENSSSCG00000037201	MPV17	turquoise	0.3384	0.236631	0.0576321	0.844848
ENSSSCG00000017328	ARHGAP27	turquoise	0.338296	0.236784	-0.923626	2.42655e-06
ENSSSCG00000027654	NETO1	turquoise	0.338159	0.236986	-0.550354	0.0414228
ENSSSCG00000015659	YOD1	turquoise	-0.338105	0.237066	0.930543	1.39391e-06
ENSSSCG00000003743	GALNT1	turquoise	0.338068	0.237121	-0.898236	1.28357e-05
ENSSSCG00000008740	FBXL5	turquoise	-0.338047	0.237152	0.944822	3.61567e-07
ENSSSCG00000032182	CGGBP1	turquoise	-0.337943	0.237306	0.60635	0.0215169
ENSSSCG00000014147	CCNH	turquoise	-0.337689	0.23768	0.529402	0.0515568
ENSSSCG00000008898		turquoise	0.337564	0.237865	-0.805813	0.000502209
ENSSSCG00000017745	UTP6	turquoise	-0.337561	0.237869	0.750502	0.00198451
ENSSSCG00000001062	DTNBP1	turquoise	-0.337545	0.237894	0.918629	3.51033e-06
ENSSSCG00000032902	KLK7	turquoise	0.337499	0.237961	-0.870188	5.19279e-05
ENSSSCG00000011977	DCBLD2	turquoise	-0.337425	0.23807	0.942166	4.76583e-07
ENSSSCG00000010629	ADRA2A	turquoise	0.337287	0.238274	-0.79286	0.000717932
ENSSSCG00000021217	FKBP3	turquoise	-0.337119	0.238524	0.902146	1.02353e-05
ENSSSCG00000041494		turquoise	-0.337054	0.23862	0.571447	0.0327807
ENSSSCG00000023969	ACER1	turquoise	0.336947	0.238779	-0.918817	3.46351e-06
ENSSSCG00000007334	SRC	turquoise	-0.336815	0.238973	0.895877	1.46502e-05
ENSSSCG00000047067		turquoise	0.336813	0.238978	-0.91232	5.41833e-06
ENSSSCG00000021026	TMEM51	turquoise	0.336404	0.239583	-0.929336	1.54172e-06
ENSSSCG00000006894	FNBP1L	turquoise	-0.336375	0.239627	0.82323	0.000297496
ENSSSCG00000014083	ANKDD1B	turquoise	0.336031	0.240138	-0.367265	0.196435
ENSSSCG00000020694	DSG1	turquoise	0.335937	0.240278	-0.868212	5.6602e-05
ENSSSCG00000011264	CSRNP1	turquoise	0.335908	0.240322	-0.808332	0.000467086
ENSSSCG00000017569	CHAD	turquoise	0.335867	0.240382	-0.56257	0.0362365
ENSSSCG00000017338	PLCD3	turquoise	0.335855	0.2404	-0.73011	0.00302883
ENSSSCG00000001372	GNL1	turquoise	0.335712	0.240613	-0.872922	4.59844e-05
ENSSSCG00000036044		turquoise	-0.335688	0.240649	0.409193	0.146269
ENSSSCG00000032536	B3GNT8	turquoise	0.335524	0.240893	-0.781538	0.00096221
ENSSSCG00000012591	AMOT	turquoise	0.335365	0.241129	-0.866323	6.13841e-05
ENSSSCG00000042865		turquoise	0.335286	0.241248	-0.314641	0.273233
ENSSSCG00000033613	FOXS1	turquoise	0.335215	0.241354	-0.506405	0.0646276
ENSSSCG00000007135	NINL	turquoise	0.335199	0.241378	-0.919001	3.41804e-06
ENSSSCG00000047964		turquoise	-0.335192	0.241387	0.666659	0.00921867
ENSSSCG00000037987	MS4A10	turquoise	-0.335077	0.241559	0.913021	5.17169e-06
ENSSSCG00000000871	SLC5A8	turquoise	0.335069	0.241571	-0.89648	1.41671e-05
ENSSSCG00000027480	KLF10	turquoise	0.335039	0.241616	-0.944652	3.68172e-07
ENSSSCG00000037591	AMMECR1	turquoise	-0.334891	0.241838	0.842329	0.000156514
ENSSSCG00000008582		turquoise	-0.334791	0.241986	0.87506	4.17334e-05
ENSSSCG00000002481	SERPINA5	turquoise	-0.334525	0.242383	0.751261	0.00195208
ENSSSCG00000023643	PDHA1	turquoise	-0.33446	0.242481	0.656518	0.0107625
ENSSSCG00000009621	PHYHIP	turquoise	0.334447	0.2425	-0.970549	8.84119e-09
ENSSSCG00000019320	U6	turquoise	-0.334428	0.242529	0.390555	0.167384
ENSSSCG00000017300	MRC2	turquoise	0.3343	0.24272	-0.959674	5.69073e-08
ENSSSCG00000048122		turquoise	-0.33428	0.24275	0.785112	0.000878849
ENSSSCG00000005608	ANGPTL2	turquoise	0.334257	0.242786	-0.970194	9.49303e-09
ENSSSCG00000023728	TECTA	turquoise	0.334135	0.242967	0.449706	0.106669
ENSSSCG00000033278	ATP6V1D	turquoise	0.334079	0.243052	-0.86487	6.52832e-05
ENSSSCG00000028740	CTDSPL	turquoise	0.333955	0.243238	-0.831065	0.000230762
ENSSSCG00000011212		turquoise	-0.333719	0.243592	0.91961	3.27103e-06
ENSSSCG00000011643	AMOTL2	turquoise	0.33371	0.243604	-0.794069	0.000695104
ENSSSCG00000041503		turquoise	-0.333681	0.243648	0.835753	0.000197016
ENSSSCG00000013766	IL27RA	turquoise	-0.333623	0.243735	0.581153	0.0292884
ENSSSCG00000001700	SLC29A1	turquoise	0.332987	0.244691	-0.954027	1.23409e-07
ENSSSCG00000049374		turquoise	-0.332898	0.244824	0.895136	1.52614e-05
ENSSSCG00000036938	CTDSP1	turquoise	0.332878	0.244854	-0.779405	0.00101489
ENSSSCG00000038540		turquoise	0.332786	0.244993	-0.347781	0.223055
ENSSSCG00000036381	RBMS3	turquoise	0.332765	0.245025	-0.944773	3.63428e-07
ENSSSCG00000028976	PPP2R2B	turquoise	0.332634	0.245222	-0.840199	0.000168816
ENSSSCG00000013044	FLRT1	turquoise	0.332286	0.245746	-0.952548	1.48753e-07
ENSSSCG00000014250	C5orf63	turquoise	-0.332211	0.24586	0.955592	1.00598e-07
ENSSSCG00000043138		turquoise	-0.332163	0.245932	0.380784	0.179208
ENSSSCG00000002456	CHGA	turquoise	-0.332163	0.245932	0.380784	0.179208
ENSSSCG00000043966		turquoise	0.332129	0.245983	-0.634013	0.014895
ENSSSCG00000037292	PLA2G4E	turquoise	0.332101	0.246025	-0.803917	0.00053003
ENSSSCG00000024417	ERC2	turquoise	-0.331804	0.246474	0.740148	0.00247124
ENSSSCG00000014176	RGMB	turquoise	0.331705	0.246624	-0.928034	1.71526e-06
ENSSSCG00000024221	SMUG1	turquoise	0.331652	0.246703	-0.746542	0.00216076
ENSSSCG00000008479	DHX57	turquoise	0.331614	0.246761	0.365647	0.198564
ENSSSCG00000040562	C8orf88	turquoise	0.331583	0.246809	-0.483699	0.0797059
ENSSSCG00000004946	ZWILCH	turquoise	-0.331499	0.246935	0.891154	1.89165e-05
ENSSSCG00000009137	GAR1	turquoise	-0.331336	0.247182	0.699765	0.00533573
ENSSSCG00000040836	DCC	turquoise	-0.331305	0.247228	0.855408	9.59068e-05
ENSSSCG00000048791		turquoise	0.331129	0.247495	-0.717487	0.00386575
ENSSSCG00000004869	CNDP1	turquoise	0.330991	0.247705	-0.761074	0.00156928
ENSSSCG00000011412	CACNA2D2	turquoise	0.330943	0.247777	-0.956638	8.73926e-08
ENSSSCG00000035771	MRPS22	turquoise	-0.330918	0.247815	0.882194	2.9803e-05
ENSSSCG00000037602		turquoise	-0.330864	0.247896	0.734448	0.00277685
ENSSSCG00000015701	MGAT5	turquoise	0.330796	0.248	-0.860506	7.82216e-05
ENSSSCG00000009768	TCTN2	turquoise	-0.330766	0.248045	0.842699	0.000154453
ENSSSCG00000011635	TMEM108	turquoise	0.33074	0.248084	-0.868002	5.71181e-05
ENSSSCG00000013337	BBOX1	turquoise	0.330722	0.248112	-0.911771	5.61812e-06
ENSSSCG00000024205	ARHGEF26	turquoise	0.330703	0.248142	-0.98243	4.08982e-10
ENSSSCG00000025500		turquoise	-0.330624	0.24826	-0.287331	0.319214
ENSSSCG00000008495	PRKD3	turquoise	-0.330588	0.248315	0.700392	0.00527726
ENSSSCG00000014924	CTSC	turquoise	0.330509	0.248435	-0.970556	8.8292e-09
ENSSSCG00000004392	AMD1	turquoise	0.330419	0.248572	-0.923674	2.41782e-06
ENSSSCG00000002377	EIF2B2	turquoise	-0.330417	0.248576	0.9529	1.42361e-07
ENSSSCG00000000600	EPS8	turquoise	0.330038	0.249151	-0.923167	2.51298e-06
ENSSSCG00000016160	ERBB4	turquoise	0.329973	0.249249	-0.883229	2.8332e-05
ENSSSCG00000001657	CUL7	turquoise	0.329959	0.249271	-0.872473	4.69203e-05
ENSSSCG00000045595		turquoise	-0.329784	0.249537	0.692954	0.00600433
ENSSSCG00000000211	AQP5	turquoise	0.329687	0.249686	-0.811009	0.000431955
ENSSSCG00000046886		turquoise	-0.329643	0.249752	0.698595	0.00544626
ENSSSCG00000037236	RPSA	turquoise	-0.329475	0.250008	0.866479	6.09775e-05
ENSSSCG00000034884	IRX1	turquoise	0.329287	0.250295	-0.915651	4.32671e-06
ENSSSCG00000025602	DOCK4	turquoise	-0.329175	0.250466	0.781806	0.000955744
ENSSSCG00000025858	ELN	turquoise	-0.32909	0.250596	0.932292	1.20076e-06
ENSSSCG00000002495	SYNE3	turquoise	-0.328983	0.250759	0.95268	1.46321e-07
ENSSSCG00000027723		turquoise	0.328928	0.250843	-0.924003	2.35758e-06
ENSSSCG00000043104		turquoise	0.328831	0.250991	-0.630149	0.0157115
ENSSSCG00000051284		turquoise	0.328768	0.251087	-0.710387	0.0044105
ENSSSCG00000023739	SNORD96	turquoise	-0.328654	0.251261	0.359201	0.207194
ENSSSCG00000017723	CCL2	turquoise	0.328498	0.251499	-0.75434	0.00182475
ENSSSCG00000008196	FAM178B	turquoise	-0.328427	0.251609	0.688108	0.00651856
ENSSSCG00000027548	KRT79	turquoise	0.328308	0.25179	-0.806787	0.000488395
ENSSSCG00000045649		turquoise	-0.328288	0.251821	0.978883	1.22319e-09
ENSSSCG00000036909	ERI3	turquoise	-0.328149	0.252033	0.643956	0.0129421
ENSSSCG00000049740		turquoise	-0.328115	0.252085	0.912664	5.29594e-06
ENSSSCG00000001841	RHCG	turquoise	-0.328013	0.252242	0.611791	0.0200664
ENSSSCG00000044837		turquoise	-0.327924	0.252379	0.670916	0.00862416
ENSSSCG00000001048	ADTRP	turquoise	-0.327924	0.252379	0.670916	0.00862416
ENSSSCG00000026346	UBE3D	turquoise	-0.327841	0.252505	0.883813	2.7528e-05
ENSSSCG00000035934	TXNDC16	turquoise	0.32754	0.252968	-0.891452	1.86209e-05
ENSSSCG00000000735	TSPAN9	turquoise	0.32754	0.252968	-0.954521	1.15788e-07
ENSSSCG00000012071		turquoise	0.327495	0.253036	-0.948529	2.40142e-07
ENSSSCG00000016991	DUSP1	turquoise	0.327485	0.253051	-0.858956	8.32917e-05
ENSSSCG00000041404		turquoise	0.327415	0.25316	-0.678861	0.00759429
ENSSSCG00000007721	GTF2I	turquoise	-0.327079	0.253675	0.54795	0.0425043
ENSSSCG00000023870	SNORD12	turquoise	-0.327048	0.253724	0.740554	0.00245054
ENSSSCG00000036992		turquoise	-0.326682	0.254287	0.550201	0.0414912
ENSSSCG00000008729	LYAR	turquoise	-0.326632	0.254363	0.761539	0.00155271
ENSSSCG00000048796		turquoise	-0.326588	0.254431	-0.214077	0.462395
ENSSSCG00000021885	MDFIC	turquoise	0.326528	0.254523	-0.920754	3.00907e-06
ENSSSCG00000037900	CCND1	turquoise	0.326463	0.254623	-0.897091	1.36918e-05
ENSSSCG00000012960	CST6	turquoise	0.326452	0.25464	-0.926575	1.92847e-06
ENSSSCG00000009668	CLU	turquoise	0.326382	0.254749	-0.978199	1.47899e-09
ENSSSCG00000017448	KRT14	turquoise	0.326358	0.254785	-0.958517	6.72685e-08
ENSSSCG00000025996	MTUS2	turquoise	-0.326178	0.255063	0.716041	0.00397219
ENSSSCG00000009141	MCUB	turquoise	-0.326091	0.255198	0.88052	3.23132e-05
ENSSSCG00000033472		turquoise	0.326075	0.255222	-0.465126	0.0937595
ENSSSCG00000010631	GPAM	turquoise	0.326026	0.255298	-0.799726	0.000595906
ENSSSCG00000039824	ARRDC1	turquoise	0.325708	0.255789	-0.851675	0.000110812
ENSSSCG00000016971	MCCC2	turquoise	-0.325648	0.255881	0.776583	0.00108808
ENSSSCG00000006350		turquoise	-0.325636	0.2559	0.468296	0.0912477
ENSSSCG00000007539	RBBP8NL	turquoise	0.325633	0.255905	-0.430011	0.124866
ENSSSCG00000051429		turquoise	-0.325528	0.256066	0.523444	0.0547407
ENSSSCG00000048589		turquoise	-0.32544	0.256202	0.972841	5.46464e-09
ENSSSCG00000043781	RHOB	turquoise	-0.325371	0.25631	0.898273	1.28089e-05
ENSSSCG00000007287	GSS	turquoise	-0.32529	0.256435	0.885443	2.5383e-05
ENSSSCG00000023987		turquoise	-0.325249	0.256499	-0.335798	0.240485
ENSSSCG00000011379	KLHDC8B	turquoise	-0.325142	0.256664	0.630604	0.0156137
ENSSSCG00000002746	DHODH	turquoise	-0.324829	0.257149	0.448389	0.107825
ENSSSCG00000021702	XRRA1	turquoise	-0.32463	0.257458	0.835477	0.000198883
ENSSSCG00000024657		turquoise	-0.324359	0.257878	0.214443	0.461613
ENSSSCG00000050114		turquoise	0.324323	0.257934	-0.496983	0.0706124
ENSSSCG00000016863	OXCT1	turquoise	-0.324278	0.258004	0.746433	0.00216575
ENSSSCG00000035622	UBE2D3	turquoise	-0.3241	0.25828	0.941768	4.96186e-07
ENSSSCG00000008358	ACTR2	turquoise	-0.324081	0.25831	0.471283	0.0889235
ENSSSCG00000003435	MIIP	turquoise	0.323922	0.258558	-0.522953	0.0550089
ENSSSCG00000036013		turquoise	-0.32381	0.258732	0.693175	0.00598168
ENSSSCG00000029815	SRGAP1	turquoise	-0.323701	0.258902	0.909248	6.61666e-06
ENSSSCG00000017777	FLOT2	turquoise	0.323557	0.259125	-0.979694	9.68849e-10
ENSSSCG00000048356		turquoise	-0.323545	0.259144	0.805469	0.000507175
ENSSSCG00000017339	NMT1	turquoise	-0.32337	0.259417	0.234492	0.419705
ENSSSCG00000034771	CCNDBP1	turquoise	-0.323252	0.2596	0.866669	6.04859e-05
ENSSSCG00000048040		turquoise	0.323227	0.259639	-0.319953	0.264774
ENSSSCG00000011905		turquoise	-0.323223	0.259645	0.769969	0.00127626
ENSSSCG00000015426	RELN	turquoise	-0.323182	0.259709	0.541399	0.0455567
ENSSSCG00000014020	CANX	turquoise	-0.323088	0.259856	0.855746	9.46422e-05
ENSSSCG00000009085	NUDT6	turquoise	-0.322999	0.259995	0.918762	3.47707e-06
ENSSSCG00000017032		turquoise	-0.322583	0.260645	0.742595	0.0023485
ENSSSCG00000043204		turquoise	0.322173	0.261286	-0.482691	0.0804279
ENSSSCG00000048979		turquoise	0.322136	0.261344	-0.499081	0.0692469
ENSSSCG00000034993	NREP	turquoise	0.32207	0.261448	-0.82595	0.000272771
ENSSSCG00000000906	TMCC3	turquoise	0.322063	0.261458	-0.962928	3.45943e-08
ENSSSCG00000012136	PIR	turquoise	0.32201	0.261541	-0.952363	1.52196e-07
ENSSSCG00000011762	ACTL6A	turquoise	-0.321979	0.26159	0.91546	4.38384e-06
ENSSSCG00000006239	UBXN2B	turquoise	-0.321953	0.26163	0.457993	0.0995884
ENSSSCG00000026472	RPL7L1	turquoise	-0.321841	0.261807	0.898247	1.28273e-05
ENSSSCG00000038522	FAM162B	turquoise	0.321822	0.261836	-0.217466	0.455167
ENSSSCG00000005855	EXD3	turquoise	0.321818	0.261841	-0.710683	0.00438666
ENSSSCG00000045506		turquoise	-0.321616	0.262159	0.533491	0.0494508
ENSSSCG00000013244	PACSIN3	turquoise	0.321512	0.262322	-0.958237	6.99929e-08
ENSSSCG00000003253		turquoise	0.321168	0.262861	-0.909492	6.51396e-06
ENSSSCG00000004639	USP8	turquoise	-0.320912	0.263263	0.895512	1.49484e-05
ENSSSCG00000016127	NDUFS1	turquoise	-0.320806	0.263431	0.919319	3.3406e-06
ENSSSCG00000033691	RAB26	turquoise	0.320612	0.263736	-0.882936	2.87424e-05
ENSSSCG00000011559		turquoise	0.320594	0.263764	-0.900951	1.09792e-05
ENSSSCG00000028983	TBC1D1	turquoise	-0.319988	0.264719	0.937308	7.65032e-07
ENSSSCG00000006480	NAXE	turquoise	-0.319586	0.265353	0.774773	0.00113722
ENSSSCG00000048064		turquoise	0.319573	0.265374	-0.548492	0.042259
ENSSSCG00000009853	WSB2	turquoise	0.319499	0.265491	-0.871978	4.79696e-05
ENSSSCG00000031871	ENTPD4	turquoise	0.319437	0.265588	-0.89319	1.6968e-05
ENSSSCG00000049706		turquoise	0.319259	0.26587	-0.690223	0.00629013
ENSSSCG00000031781	PSMB10	turquoise	-0.319193	0.265974	0.782815	0.000931737
ENSSSCG00000046881	DPRX	turquoise	-0.319181	0.265993	0.969199	1.1535e-08
ENSSSCG00000023177	RRP9	turquoise	-0.319062	0.266182	0.858753	8.39759e-05
ENSSSCG00000037670	TMEM164	turquoise	0.318966	0.266335	-0.919664	3.25836e-06
ENSSSCG00000024347	CRISP3	turquoise	-0.318526	0.26703	0.773136	0.00118318
ENSSSCG00000011521	PDZRN3	turquoise	0.31849	0.267088	-0.956111	9.38483e-08
ENSSSCG00000004928	CILP	turquoise	0.318476	0.267111	-0.875829	4.02862e-05
ENSSSCG00000041880		turquoise	-0.318202	0.267545	0.634083	0.0148803
ENSSSCG00000045858		turquoise	-0.318202	0.267545	0.634083	0.0148803
ENSSSCG00000039849	PVALEF	turquoise	-0.318202	0.267545	0.634083	0.0148803
ENSSSCG00000049147		turquoise	0.318182	0.267576	-0.511729	0.0614109
ENSSSCG00000017282	SCN4A	turquoise	-0.318139	0.267645	0.697202	0.00558015
ENSSSCG00000008456	PLEKHH2	turquoise	0.317981	0.267895	-0.806763	0.000488731
ENSSSCG00000010574	LDB1	turquoise	0.317714	0.26832	-0.906291	7.96774e-06
ENSSSCG00000006183	SBSPON	turquoise	-0.317698	0.268346	0.963566	3.12141e-08
ENSSSCG00000024329	C12orf43	turquoise	-0.31765	0.268423	0.888561	2.16608e-05
ENSSSCG00000008590	MFSD2B	turquoise	0.317648	0.268426	0.517977	0.0577846
ENSSSCG00000030033	ACSM4	turquoise	-0.317353	0.268895	0.181596	0.534388
ENSSSCG00000012974	CFL1	turquoise	0.317274	0.26902	-0.847083	0.00013167
ENSSSCG00000011229	STT3B	turquoise	0.317216	0.269114	-0.507701	0.0638336
ENSSSCG00000006501	SSR2	turquoise	-0.317204	0.269131	0.759159	0.00163883
ENSSSCG00000016258	DNER	turquoise	0.317089	0.269316	-0.803522	0.000535973
ENSSSCG00000010379	FRMPD2	turquoise	0.31705	0.269378	-0.602799	0.0225054
ENSSSCG00000007116	CD93	turquoise	0.317011	0.26944	-0.683232	0.00706988
ENSSSCG00000017920		turquoise	0.316995	0.269466	-0.977061	2.00216e-09
ENSSSCG00000043289		turquoise	-0.316987	0.269479	-0.524629	0.054096
ENSSSCG00000006203	COPS5	turquoise	-0.316976	0.269495	0.943434	4.18407e-07
ENSSSCG00000004677	DUOXA1	turquoise	0.316976	0.269495	-0.979377	1.06247e-09
ENSSSCG00000026793	B4GALT2	turquoise	0.316948	0.269539	-0.906748	7.74509e-06
ENSSSCG00000010701	BTBD16	turquoise	-0.316909	0.269602	0.963534	3.13804e-08
ENSSSCG00000045588		turquoise	-0.316858	0.269683	0.567021	0.0344715
ENSSSCG00000008932	TMPRSS11B	turquoise	-0.316851	0.269694	0.77168	0.00122526
ENSSSCG00000033123	TMEM97	turquoise	0.316799	0.269777	-0.960391	5.11838e-08
ENSSSCG00000011959	ABI3BP	turquoise	0.316701	0.269934	-0.930358	1.41585e-06
ENSSSCG00000003728	TRAPPC8	turquoise	-0.316635	0.27004	0.948161	2.50444e-07
ENSSSCG00000028790	ANKRD16	turquoise	0.316535	0.270199	-0.423674	0.131142
ENSSSCG00000049064		turquoise	0.316389	0.270432	-0.392619	0.164953
ENSSSCG00000000709	PLEKHG6	turquoise	0.316287	0.270595	-0.955484	1.02043e-07
ENSSSCG00000013599	ANGPTL4	turquoise	-0.316209	0.270721	0.949991	2.02671e-07
ENSSSCG00000029438	SESN2	turquoise	-0.316077	0.270931	0.91227	5.4361e-06
ENSSSCG00000007817	IL4R	turquoise	-0.315969	0.271103	0.860146	7.93769e-05
ENSSSCG00000020853	BTBD3	turquoise	-0.315877	0.271251	0.965596	2.22278e-08
ENSSSCG00000017864		turquoise	0.315801	0.271372	-0.891118	1.89531e-05
ENSSSCG00000036274		turquoise	0.315174	0.272378	-0.914723	4.61079e-06
ENSSSCG00000031492	PPP1R18	turquoise	0.314914	0.272795	-0.890002	2.00987e-05
ENSSSCG00000012822	MPP1	turquoise	-0.314713	0.273118	0.950211	1.97478e-07
ENSSSCG00000033465		turquoise	-0.314546	0.273386	0.223858	0.441685
ENSSSCG00000027444	STAU1	turquoise	0.314421	0.273587	-0.289776	0.314928
ENSSSCG00000031949	TP53BP1	turquoise	-0.314305	0.273774	0.841595	0.000160671
ENSSSCG00000043094		turquoise	0.313984	0.274291	-0.523221	0.0548623
ENSSSCG00000043022		turquoise	-0.313981	0.274296	0.854207	0.000100512
ENSSSCG00000008281	RTKN	turquoise	0.313967	0.274319	-0.966437	1.91957e-08
ENSSSCG00000022846	SLC4A3	turquoise	0.313935	0.274369	-0.914281	4.75141e-06
ENSSSCG00000003876	CDKN2C	turquoise	0.313919	0.274395	-0.514762	0.0596311
ENSSSCG00000014081	CERT1	turquoise	0.313892	0.274438	-0.875139	4.1583e-05
ENSSSCG00000004414	CD164	turquoise	-0.313735	0.274692	0.962701	3.58679e-08
ENSSSCG00000023607	CYP4F22	turquoise	0.313535	0.275015	-0.871074	4.99367e-05
ENSSSCG00000019408		turquoise	-0.313244	0.275485	0.525399	0.0536806
ENSSSCG00000039914	ZNF470	turquoise	0.31323	0.275507	-0.899564	1.18983e-05
ENSSSCG00000015729	TSN	turquoise	-0.313147	0.275642	0.923504	2.44939e-06
ENSSSCG00000014113	HOMER1	turquoise	-0.312407	0.276838	0.921697	2.80642e-06
ENSSSCG00000015305	GTPBP10	turquoise	-0.312375	0.27689	0.945089	3.51398e-07
ENSSSCG00000020715	GOLGA7	turquoise	-0.312248	0.277096	0.880275	3.26959e-05
ENSSSCG00000010278	CDH23	turquoise	0.312147	0.27726	-0.931772	1.25575e-06
ENSSSCG00000006970	DLC1	turquoise	-0.311766	0.277877	0.918612	3.51473e-06
ENSSSCG00000012824	GAB3	turquoise	-0.311596	0.278153	0.757272	0.00170976
ENSSSCG00000003885	CMPK1	turquoise	-0.311507	0.278299	0.967255	1.65854e-08
ENSSSCG00000009535	EFNB2	turquoise	-0.31137	0.278521	0.428741	0.126107
ENSSSCG00000007235	TPX2	turquoise	-0.311289	0.278653	0.887159	2.32749e-05
ENSSSCG00000023907	AFAP1	turquoise	-0.310838	0.279387	0.883809	2.75341e-05
ENSSSCG00000034119		turquoise	-0.310743	0.279542	-0.428742	0.126106
ENSSSCG00000024517	AKAP6	turquoise	-0.310742	0.279543	0.832078	0.000223103
ENSSSCG00000007391	MATN4	turquoise	0.310739	0.279548	-0.875242	4.13868e-05
ENSSSCG00000008854	CPE	turquoise	0.310381	0.280132	-0.943203	4.28538e-07
ENSSSCG00000042139		turquoise	0.310316	0.280238	-0.797551	0.000632598
ENSSSCG00000005287	PSAT1	turquoise	-0.310087	0.280612	0.560722	0.0369883
ENSSSCG00000014443	CAMK2A	turquoise	0.309759	0.281147	-0.50751	0.0639505
ENSSSCG00000012174	APOO	turquoise	-0.309645	0.281335	0.802804	0.000546922
ENSSSCG00000021443	SGK1	turquoise	-0.309486	0.281594	0.692159	0.0060865
ENSSSCG00000048424		turquoise	0.309251	0.281979	-0.854552	9.91688e-05
ENSSSCG00000011532	SUMF1	turquoise	0.309241	0.281996	-0.917877	3.70335e-06
ENSSSCG00000046057		turquoise	-0.309218	0.282034	0.461735	0.0964999
ENSSSCG00000033669	RDH10	turquoise	-0.308853	0.282631	0.978689	1.29184e-09
ENSSSCG00000022396	BLZF1	turquoise	-0.308831	0.282667	0.940473	5.64584e-07
ENSSSCG00000045526		turquoise	0.308791	0.282733	-0.569325	0.0335836
ENSSSCG00000036451		turquoise	0.30869	0.282899	-0.921409	2.86699e-06
ENSSSCG00000010190		turquoise	-0.308524	0.28317	0.603752	0.0222368
ENSSSCG00000016199	CYP27A1	turquoise	0.30837	0.283423	-0.907041	7.60553e-06
ENSSSCG00000041192		turquoise	-0.308106	0.283857	0.735787	0.00270254
ENSSSCG00000027675		turquoise	-0.308032	0.283979	0.937062	7.82786e-07
ENSSSCG00000037755	NSMCE2	turquoise	0.30771	0.284508	0.155428	0.595708
ENSSSCG00000010858	SDE2	turquoise	-0.307544	0.284783	-0.235118	0.418429
ENSSSCG00000013729	GCDH	turquoise	-0.307349	0.285103	0.555845	0.0390283
ENSSSCG00000007636	GJC3	turquoise	0.307228	0.285303	-0.716533	0.00393569
ENSSSCG00000016026	ZC3H15	turquoise	-0.30702	0.285647	0.864495	6.63224e-05
ENSSSCG00000004065	TIAM2	turquoise	0.306944	0.285771	-0.878542	3.55009e-05
ENSSSCG00000037815	ZC3H12A	turquoise	0.30687	0.285893	-0.896245	1.43541e-05
ENSSSCG00000005986	FAM83A	turquoise	0.306864	0.285903	-0.803919	0.000529994
ENSSSCG00000036877		turquoise	0.306859	0.285912	-0.762174	0.00153037
ENSSSCG00000006842		turquoise	-0.306822	0.285973	0.586824	0.0273808
ENSSSCG00000016989	RPL26L1	turquoise	-0.306801	0.286008	0.899015	1.22786e-05
ENSSSCG00000013437	TCF3	turquoise	0.306622	0.286304	-0.920547	3.05507e-06
ENSSSCG00000023550	IL1RL2	turquoise	0.3066	0.286339	-0.89123	1.88407e-05
ENSSSCG00000034792	KLK5	turquoise	0.306291	0.28685	-0.869094	5.44745e-05
ENSSSCG00000031429	YAP1	turquoise	-0.306288	0.286855	0.925791	2.05191e-06
ENSSSCG00000048226		turquoise	0.306278	0.286872	-0.787262	0.000831561
ENSSSCG00000043783		turquoise	0.306251	0.286917	-0.417298	0.137666
ENSSSCG00000031154	ACKR2	turquoise	0.306248	0.286921	-0.549947	0.0416046
ENSSSCG00000004412	MICAL1	turquoise	0.306136	0.287107	-0.930605	1.38668e-06
ENSSSCG00000015401	PCLO	turquoise	-0.305875	0.28754	0.919729	3.24306e-06
ENSSSCG00000008535	CLIP4	turquoise	0.305859	0.287565	-0.944896	3.58728e-07
ENSSSCG00000011491	THOC7	turquoise	-0.305708	0.287815	0.929537	1.51617e-06
ENSSSCG00000038609		turquoise	-0.305655	0.287903	0.514725	0.0596524
ENSSSCG00000017799	CPD	turquoise	0.305501	0.28816	-0.941593	5.05026e-07
ENSSSCG00000023921	VSTM2B	turquoise	0.30549	0.288177	-0.418507	0.136413
ENSSSCG00000028707	NF2	turquoise	-0.305391	0.288341	0.958407	6.83219e-08
ENSSSCG00000040763		turquoise	0.305231	0.288606	-0.732685	0.00287716
ENSSSCG00000037341	RNF220	turquoise	0.305183	0.288687	-0.899165	1.21736e-05
ENSSSCG00000030274	PPEF1	turquoise	-0.305025	0.288949	0.481709	0.0811358
ENSSSCG00000049923		turquoise	-0.304948	0.289078	0.58658	0.027461
ENSSSCG00000044163	ssc-mir-9861	turquoise	-0.304724	0.28945	0.806275	0.000495625
ENSSSCG00000031637		turquoise	-0.304724	0.28945	0.806275	0.000495625
ENSSSCG00000031877	ABHD8	turquoise	0.304547	0.289744	-0.32016	0.264448
ENSSSCG00000024569	ANO9	turquoise	0.304538	0.28976	-0.842138	0.00015759
ENSSSCG00000036645	PDE6B	turquoise	0.304425	0.289947	-0.927719	1.75948e-06
ENSSSCG00000044713		turquoise	0.3043	0.290155	-0.402044	0.154147
ENSSSCG00000037534	OPCML	turquoise	-0.304203	0.290317	0.925115	2.16329e-06
ENSSSCG00000010280	VSIR	turquoise	0.304151	0.290404	-0.954506	1.16012e-07
ENSSSCG00000013303	ABTB2	turquoise	-0.30402	0.290622	0.879929	3.32414e-05
ENSSSCG00000012732		turquoise	0.303912	0.290802	-0.408503	0.147018
ENSSSCG00000023162	CDH3	turquoise	-0.303819	0.290956	0.872917	4.59955e-05
ENSSSCG00000004324		turquoise	-0.303606	0.291311	0.955099	1.07371e-07
ENSSSCG00000023983	AGPS	turquoise	-0.303205	0.291982	0.585878	0.0276924
ENSSSCG00000049893		turquoise	-0.303106	0.292148	0.976954	2.05861e-09
ENSSSCG00000003168	ALDH16A1	turquoise	-0.30285	0.292575	0.502128	0.0672975
ENSSSCG00000017962	KDM6B	turquoise	0.302619	0.292962	-0.632797	0.0151484
ENSSSCG00000051059		turquoise	-0.30257	0.293044	0.449265	0.107055
ENSSSCG00000004390	SESN1	turquoise	-0.302343	0.293425	0.925779	2.05386e-06
ENSSSCG00000026004	MSRB3	turquoise	0.302159	0.293734	-0.980425	7.78754e-10
ENSSSCG00000001660	PTK7	turquoise	0.302127	0.293787	-0.524747	0.0540325
ENSSSCG00000010201	RASGEF1A	turquoise	0.302054	0.293909	-0.856411	9.2192e-05
ENSSSCG00000037305	TMEM33	turquoise	-0.301991	0.294015	0.845449	0.000139819
ENSSSCG00000004125	STX11	turquoise	0.301919	0.294136	-0.894675	1.56523e-05
ENSSSCG00000010277	SLC29A3	turquoise	0.3019	0.294169	-0.897954	1.30421e-05
ENSSSCG00000004347	FBXL4	turquoise	0.301539	0.294775	-0.893168	1.6988e-05
ENSSSCG00000005740	SARDH	turquoise	0.301461	0.294905	-0.637175	0.014251
ENSSSCG00000009283	TNFRSF19	turquoise	-0.301425	0.294966	0.868748	5.53023e-05
ENSSSCG00000036213		turquoise	-0.301296	0.295183	0.95456	1.15198e-07
ENSSSCG00000044239		turquoise	0.301141	0.295444	-0.954568	1.15078e-07
ENSSSCG00000004674	SHF	turquoise	0.301072	0.295559	-0.981899	4.88459e-10
ENSSSCG00000042104		turquoise	-0.300896	0.295856	0.683767	0.00700761
ENSSSCG00000006995	ASAH1	turquoise	0.300812	0.295998	-0.822813	0.00030145
ENSSSCG00000043756		turquoise	-0.300738	0.296122	0.913763	4.9207e-06
ENSSSCG00000004133	FUCA2	turquoise	0.300727	0.29614	-0.865147	6.45262e-05
ENSSSCG00000000547	MRPS35	turquoise	-0.300546	0.296446	0.918607	3.51591e-06
ENSSSCG00000006758	SYT6	turquoise	-0.300279	0.296896	0.973294	4.94465e-09
ENSSSCG00000036656		turquoise	0.300058	0.29727	-0.935658	8.9084e-07
ENSSSCG00000036952	GTPBP8	turquoise	-0.299752	0.297787	0.474195	0.0866975
ENSSSCG00000014976	ARHGAP42	turquoise	0.299574	0.298088	-0.900781	1.10889e-05
ENSSSCG00000006463	PEAR1	turquoise	-0.299451	0.298296	-0.47021	0.0897534
ENSSSCG00000003547	NCMAP	turquoise	0.299139	0.298824	-0.930541	1.39416e-06
ENSSSCG00000017095	SEMA5A	turquoise	0.299018	0.29903	-0.374846	0.186649
ENSSSCG00000012727	FMR1	turquoise	-0.299009	0.299044	0.888875	2.13125e-05
ENSSSCG00000011060	GAD2	turquoise	-0.298945	0.299153	0.994932	2.41884e-13
ENSSSCG00000001453	HLA-DRA	turquoise	-0.298734	0.29951	-0.451065	0.105484
ENSSSCG00000037156	RBPJL	turquoise	0.298549	0.299825	-0.961856	4.09524e-08
ENSSSCG00000023596		turquoise	0.298422	0.30004	-0.918707	3.49074e-06
ENSSSCG00000041766		turquoise	0.298375	0.30012	-0.953804	1.2698e-07
ENSSSCG00000034086	ATP5F1C	turquoise	-0.298352	0.300158	0.815487	0.000377965
ENSSSCG00000021464	SOAT1	turquoise	-0.298163	0.30048	0.968526	1.31149e-08
ENSSSCG00000017835	CLUH	turquoise	0.298014	0.300732	-0.866974	5.97018e-05
ENSSSCG00000048696		turquoise	0.297744	0.301192	-0.577941	0.0304117
ENSSSCG00000012380	P2RY4	turquoise	0.297738	0.301203	-0.689782	0.00633721
ENSSSCG00000015232	ST3GAL4	turquoise	0.297683	0.301296	-0.936187	8.48786e-07
ENSSSCG00000037508	GSN	turquoise	0.297608	0.301425	-0.982476	4.02637e-10
ENSSSCG00000037102	FSTL3	turquoise	-0.29733	0.301897	0.92091	2.9748e-06
ENSSSCG00000045465		turquoise	-0.29725	0.302035	0.598844	0.0236462
ENSSSCG00000033176	SAP30L	turquoise	0.297085	0.302315	-0.877015	3.81334e-05
ENSSSCG00000006872	AGL	turquoise	-0.297061	0.302356	0.373833	0.187938
ENSSSCG00000022933	EFR3B	turquoise	0.296962	0.302525	0.506993	0.0642668
ENSSSCG00000034811	QDPR	turquoise	-0.296958	0.302532	0.605114	0.0218573
ENSSSCG00000005828	EGFL7	turquoise	-0.296854	0.302709	0.917234	3.87539e-06
ENSSSCG00000021821	MYO1C	turquoise	0.296784	0.302829	-0.89109	1.89809e-05
ENSSSCG00000051561		turquoise	-0.296619	0.30311	-0.459682	0.0981857
ENSSSCG00000000867	SPIC	turquoise	-0.296606	0.303133	-0.588552	0.0268185
ENSSSCG00000013305	CAPRIN1	turquoise	-0.296581	0.303176	0.956013	9.50983e-08
ENSSSCG00000005291	TLE1	turquoise	0.296477	0.303352	-0.953322	1.35003e-07
ENSSSCG00000010874	ADSS2	turquoise	-0.29647	0.303365	0.642501	0.013215
ENSSSCG00000047573		turquoise	-0.296242	0.303756	0.740559	0.00245028
ENSSSCG00000032811	ODF3L2	turquoise	-0.296242	0.303756	0.740559	0.00245028
ENSSSCG00000018902	U6	turquoise	-0.296242	0.303756	0.740559	0.00245028
ENSSSCG00000050020		turquoise	-0.296242	0.303756	0.740559	0.00245028
ENSSSCG00000036538		turquoise	-0.296242	0.303756	0.740559	0.00245028
ENSSSCG00000042649		turquoise	-0.296242	0.303756	0.740559	0.00245028
ENSSSCG00000009469	ACOD1	turquoise	-0.296242	0.303756	0.740559	0.00245028
ENSSSCG00000042210		turquoise	-0.296242	0.303756	0.740559	0.00245028
ENSSSCG00000047886		turquoise	-0.296242	0.303756	0.740559	0.00245028
ENSSSCG00000050982		turquoise	-0.296242	0.303756	0.740559	0.00245028
ENSSSCG00000017364	HROB	turquoise	0.296109	0.303983	-0.885249	2.56312e-05
ENSSSCG00000017346	EFTUD2	turquoise	-0.295997	0.304175	0.66091	0.0100712
ENSSSCG00000048494		turquoise	0.295949	0.304256	-0.346507	0.224869
ENSSSCG00000043869		turquoise	0.295793	0.304524	-0.823086	0.00029886
ENSSSCG00000010995	CHMP5	turquoise	-0.295521	0.30499	0.858864	8.36022e-05
ENSSSCG00000032723	ACER3	turquoise	-0.295418	0.305165	0.889891	2.02154e-05
ENSSSCG00000047348		turquoise	0.295265	0.305429	-0.717535	0.00386228
ENSSSCG00000032503		turquoise	0.295194	0.305551	-0.789468	0.000785181
ENSSSCG00000017895	RABEP1	turquoise	-0.295078	0.305749	0.861202	7.60307e-05
ENSSSCG00000028282	SLC1A4	turquoise	0.295059	0.305782	-0.642789	0.0131606
ENSSSCG00000034357	DAG1	turquoise	0.294973	0.30593	-0.900009	1.15965e-05
ENSSSCG00000007336		turquoise	0.294893	0.306066	-0.262349	0.364874
ENSSSCG00000000003	TTC38	turquoise	0.294845	0.30615	-0.733957	0.00280452
ENSSSCG00000035152	TEF	turquoise	0.294831	0.306173	-0.846254	0.000135755
ENSSSCG00000048037		turquoise	0.294802	0.306223	-0.29745	0.301694
ENSSSCG00000051536		turquoise	0.29471	0.306382	-0.415753	0.13928
ENSSSCG00000049657		turquoise	-0.294453	0.306824	0.320102	0.26454
ENSSSCG00000012022	APP	turquoise	0.294416	0.306887	-0.930819	1.36188e-06
ENSSSCG00000020915	P4HA2	turquoise	0.294376	0.306955	-0.35034	0.219437
ENSSSCG00000033388		turquoise	0.29415	0.307345	-0.687166	0.0066224
ENSSSCG00000001589	GLP1R	turquoise	0.294108	0.307417	-0.538518	0.0469488
ENSSSCG00000008554	ABHD1	turquoise	-0.294036	0.307542	0.901987	1.03317e-05
ENSSSCG00000003989		turquoise	0.293998	0.307607	-0.864315	6.68251e-05
ENSSSCG00000043286		turquoise	-0.293778	0.307985	0.707099	0.0046823
ENSSSCG00000034516	CDKL1	turquoise	0.293632	0.308237	-0.619025	0.0182535
ENSSSCG00000032642	DDX41	turquoise	-0.293527	0.308418	0.858499	8.48353e-05
ENSSSCG00000015242	NFRKB	turquoise	0.293206	0.308972	-0.931444	1.29145e-06
ENSSSCG00000024917		turquoise	-0.29319	0.309	0.916929	3.959e-06
ENSSSCG00000048297		turquoise	0.293171	0.309034	-0.400674	0.155688
ENSSSCG00000048653		turquoise	-0.293064	0.309218	0.697441	0.00555696
ENSSSCG00000009705	GALNT7	turquoise	-0.292986	0.309354	0.638811	0.0139265
ENSSSCG00000007112	PAX1	turquoise	-0.292774	0.30972	0.976633	2.23486e-09
ENSSSCG00000000024	PARVB	turquoise	-0.292742	0.309774	0.702597	0.00507542
ENSSSCG00000014893	NARS2	turquoise	0.292707	0.309836	-0.551379	0.040968
ENSSSCG00000009558	F10	turquoise	0.292042	0.310987	-0.67977	0.00748277
ENSSSCG00000039969	THAP1	turquoise	-0.291978	0.311098	0.476139	0.0852342
ENSSSCG00000010604	SH3PXD2A	turquoise	0.291937	0.311169	-0.960363	5.13947e-08
ENSSSCG00000007268	E2F1	turquoise	0.291872	0.311281	-0.225942	0.437333
ENSSSCG00000044045		turquoise	0.29164	0.311684	-0.911815	5.60182e-06
ENSSSCG00000004570	TPM1	turquoise	0.291624	0.311712	-0.954711	1.12953e-07
ENSSSCG00000012693		turquoise	-0.291604	0.311747	0.845253	0.000140825
ENSSSCG00000000893	AMDHD1	turquoise	-0.291366	0.31216	0.698246	0.00547958
ENSSSCG00000024722	PIBF1	turquoise	-0.291344	0.312199	0.82846	0.000251445
ENSSSCG00000000559	RASSF8	turquoise	-0.291341	0.312204	0.948012	2.54689e-07
ENSSSCG00000004158	IL22RA2	turquoise	0.291272	0.312324	0.273288	0.344464
ENSSSCG00000043316		turquoise	0.291272	0.312324	0.273288	0.344464
ENSSSCG00000032218		turquoise	0.291272	0.312324	0.273288	0.344464
ENSSSCG00000049326		turquoise	0.291272	0.312324	0.273288	0.344464
ENSSSCG00000008400	CFAP36	turquoise	-0.291203	0.312442	0.779974	0.00100061
ENSSSCG00000037067		turquoise	0.290885	0.312996	0.482249	0.0807462
ENSSSCG00000016652	LRRN3	turquoise	-0.290826	0.313099	0.976063	2.57929e-09
ENSSSCG00000013772	ASF1B	turquoise	-0.290764	0.313207	0.528649	0.0519516
ENSSSCG00000004138	HIVEP2	turquoise	0.290563	0.313557	-0.891185	1.88858e-05
ENSSSCG00000033291	PIP4K2B	turquoise	0.290546	0.313585	-0.877956	3.64925e-05
ENSSSCG00000004751	CHP1	turquoise	-0.290484	0.313694	0.853863	0.000101862
ENSSSCG00000007807	CD19	turquoise	-0.290472	0.313715	0.702246	0.00510714
ENSSSCG00000031107	GLT6D1	turquoise	0.290455	0.313744	-0.966707	1.82994e-08
ENSSSCG00000011370	DALRD3	turquoise	-0.290448	0.313757	0.541967	0.0452861
ENSSSCG00000028018	EP400	turquoise	0.290421	0.313804	-0.685433	0.00681666
ENSSSCG00000045730		turquoise	0.290401	0.31384	-0.657872	0.0105456
ENSSSCG00000017046	EBF1	turquoise	0.290376	0.313882	-0.377809	0.182912
ENSSSCG00000050645		turquoise	-0.290351	0.313925	0.838746	0.000177646
ENSSSCG00000008562	SLC35F6	turquoise	0.290277	0.314054	-0.628103	0.0161574
ENSSSCG00000000528	PKP2	turquoise	0.290238	0.314123	-0.969537	1.08038e-08
ENSSSCG00000040945	ZFYVE21	turquoise	0.290191	0.314206	-0.908128	7.10421e-06
ENSSSCG00000013327	MPPED2	turquoise	0.290125	0.314319	-0.436595	0.118565
ENSSSCG00000000184	DDN	turquoise	0.290081	0.314397	-0.682849	0.00711465
ENSSSCG00000007540	CABLES2	turquoise	0.290046	0.314458	-0.446316	0.109662
ENSSSCG00000028036	MAP3K10	turquoise	0.290015	0.314512	0.205055	0.481906
ENSSSCG00000048050		turquoise	-0.289983	0.314567	0.832524	0.000219797
ENSSSCG00000042595		turquoise	0.289923	0.314672	-0.706993	0.00469122
ENSSSCG00000013505	FSD1	turquoise	-0.28966	0.315132	0.520299	0.0564774
ENSSSCG00000004676	DUOXA2	turquoise	0.28953	0.315358	-0.982323	4.24096e-10
ENSSSCG00000028606	ZBTB7B	turquoise	0.289522	0.315373	-0.870436	5.13634e-05
ENSSSCG00000011336	ELP6	turquoise	-0.289465	0.315472	0.893764	1.6449e-05
ENSSSCG00000013495	ZFR2	turquoise	0.289324	0.315719	-0.543531	0.0445464
ENSSSCG00000011964	LNP1	turquoise	-0.28928	0.315796	0.948282	2.47011e-07
ENSSSCG00000011848	TFRC	turquoise	-0.28917	0.315988	0.902587	9.97137e-06
ENSSSCG00000009940	ALKBH2	turquoise	0.288891	0.316476	-0.510364	0.0622244
ENSSSCG00000050460		turquoise	0.288873	0.316507	-0.343937	0.228557
ENSSSCG00000014182	SLCO4C1	turquoise	0.288815	0.31661	-0.615694	0.019072
ENSSSCG00000037856	EDN2	turquoise	0.288683	0.31684	0.393566	0.163845
ENSSSCG00000035456	WWC1	turquoise	0.288659	0.316883	-0.664043	0.00959942
ENSSSCG00000010274	SGPL1	turquoise	0.288611	0.316967	-0.904176	9.06674e-06
ENSSSCG00000013776	DDX39A	turquoise	-0.288543	0.317086	0.922905	2.56321e-06
ENSSSCG00000015541	IER5	turquoise	0.288525	0.317117	-0.946749	2.93345e-07
ENSSSCG00000004758	RHOV	turquoise	0.288475	0.317204	-0.936508	8.24073e-07
ENSSSCG00000009670		turquoise	-0.288363	0.317401	0.715834	0.0039876
ENSSSCG00000044588		turquoise	-0.28819	0.317706	0.593645	0.0252114
ENSSSCG00000033122		turquoise	0.288142	0.317789	-0.877434	3.73951e-05
ENSSSCG00000031660	MAPK8IP2	turquoise	0.288137	0.317797	-0.207532	0.47651
ENSSSCG00000022187	CISD3	turquoise	-0.288062	0.31793	0.896542	1.41185e-05
ENSSSCG00000000066	L3MBTL2	turquoise	-0.28799	0.318056	0.870239	5.18107e-05
ENSSSCG00000010015	OSBP2	turquoise	0.287912	0.318192	-0.89923	1.21281e-05
ENSSSCG00000038545	C10orf105	turquoise	0.287764	0.318454	-0.779534	0.00101162
ENSSSCG00000013395	BTBD10	turquoise	0.287664	0.31863	-0.790964	0.000754924
ENSSSCG00000015030	DLAT	turquoise	-0.287389	0.319112	0.813857	0.00039695
ENSSSCG00000024418	RHOU	turquoise	0.287233	0.319386	-0.736221	0.00267875
ENSSSCG00000016613	AASS	turquoise	-0.28723	0.319392	0.947274	2.7673e-07
ENSSSCG00000009880	SLC8B1	turquoise	0.287149	0.319534	-0.937233	7.70405e-07
ENSSSCG00000038405	STMN3	turquoise	-0.28713	0.319568	0.560653	0.0370167
ENSSSCG00000007100	SLC24A3	turquoise	0.286965	0.319858	-0.941739	4.97645e-07
ENSSSCG00000002935		turquoise	0.286934	0.319913	-0.839739	0.000171571
ENSSSCG00000035012	DEPDC1B	turquoise	0.286915	0.319947	-0.961575	4.27689e-08
ENSSSCG00000017488	CSF3	turquoise	-0.286889	0.319992	-0.318197	0.267554
ENSSSCG00000016535	CALD1	turquoise	0.28687	0.320027	-0.968785	1.24868e-08
ENSSSCG00000001706	AARS2	turquoise	-0.286863	0.320038	0.461671	0.0965523
ENSSSCG00000040419		turquoise	0.286851	0.320059	-0.925131	2.16068e-06
ENSSSCG00000006162	ZC2HC1A	turquoise	-0.286848	0.320065	0.806336	0.000494753
ENSSSCG00000017868		turquoise	0.286833	0.320091	-0.905265	8.48637e-06
ENSSSCG00000008237	RETSAT	turquoise	0.286828	0.320099	-0.85977	8.05964e-05
ENSSSCG00000034714	OTULIN	turquoise	0.286648	0.320418	-0.88435	2.68056e-05
ENSSSCG00000013318		turquoise	-0.286517	0.320649	0.56921	0.0336272
ENSSSCG00000038535	ARSB	turquoise	0.286412	0.320833	-0.777661	0.00105964
ENSSSCG00000002828	LPCAT2	turquoise	0.286332	0.320974	-0.931064	1.33392e-06
ENSSSCG00000049194		turquoise	0.286174	0.321253	-0.564119	0.0356148
ENSSSCG00000029687	PGAP4	turquoise	0.286154	0.321289	-0.912539	5.34008e-06
ENSSSCG00000000683	CDCA3	turquoise	-0.285926	0.321692	0.502902	0.0668089
ENSSSCG00000036554		turquoise	0.285832	0.321857	-0.90561	8.30889e-06
ENSSSCG00000030112	MACROD2	turquoise	0.285791	0.32193	-0.704338	0.00492046
ENSSSCG00000023525	TMEM26	turquoise	-0.28574	0.32202	0.879547	3.38517e-05
ENSSSCG00000051553		turquoise	-0.285654	0.322172	0.403788	0.1522
ENSSSCG00000037862		turquoise	0.285653	0.322174	-0.572373	0.0324348
ENSSSCG00000004334	MAP3K7	turquoise	-0.285568	0.322324	0.85434	9.9993e-05
ENSSSCG00000013360	TMEM86A	turquoise	0.285511	0.322425	-0.908246	7.05166e-06
ENSSSCG00000014985	MMP3	turquoise	-0.285418	0.32259	0.896812	1.39071e-05
ENSSSCG00000042910	AGO4	turquoise	0.285275	0.322843	-0.898601	1.25717e-05
ENSSSCG00000031978		turquoise	0.285265	0.322861	-0.68008	0.00744503
ENSSSCG00000007366	MYBL2	turquoise	-0.285195	0.322986	0.588339	0.0268874
ENSSSCG00000006651	ADAMTSL4	turquoise	0.285102	0.32315	-0.640236	0.0136483
ENSSSCG00000028806	RPS6KA4	turquoise	0.285088	0.323176	-0.901246	1.07915e-05
ENSSSCG00000011500	KBTBD8	turquoise	-0.284908	0.323495	0.94464	3.6862e-07
ENSSSCG00000041385		turquoise	0.284854	0.323589	-0.615208	0.0191938
ENSSSCG00000006396	IGSF9	turquoise	-0.284756	0.323764	0.864053	6.75626e-05
ENSSSCG00000047375		turquoise	0.284303	0.324568	-0.938178	7.04864e-07
ENSSSCG00000031782	ARL3	turquoise	-0.283951	0.325192	0.913659	4.95506e-06
ENSSSCG00000040869	INPP5E	turquoise	0.283871	0.325335	-0.715421	0.00401848
ENSSSCG00000049633		turquoise	-0.283849	0.325373	-0.393125	0.16436
ENSSSCG00000004779	PLCB2	turquoise	0.283525	0.325951	-0.261995	0.365544
ENSSSCG00000025606	ATM	turquoise	-0.283502	0.325992	0.8287	0.000249483
ENSSSCG00000050546		turquoise	0.283394	0.326184	-0.258259	0.372668
ENSSSCG00000011458	ACTR8	turquoise	-0.283276	0.326395	0.425109	0.129702
ENSSSCG00000009613	DMTN	turquoise	0.283116	0.32668	-0.826867	0.000264817
ENSSSCG00000022951	NFASC	turquoise	-0.283056	0.326787	0.902467	1.00428e-05
ENSSSCG00000004670	C15orf48	turquoise	0.282828	0.327193	-0.88197	3.01293e-05
ENSSSCG00000047250		turquoise	0.282808	0.327229	-0.960831	4.79052e-08
ENSSSCG00000023041		turquoise	-0.282702	0.327418	0.922161	2.71097e-06
ENSSSCG00000010595	INA	turquoise	-0.282656	0.3275	0.737796	0.00259398
ENSSSCG00000047638		turquoise	0.282509	0.327763	-0.832182	0.000222331
ENSSSCG00000004322	ANKRD6	turquoise	-0.281957	0.328749	0.646	0.0125662
ENSSSCG00000011399	GNAI2	turquoise	-0.281694	0.32922	0.84361	0.000149473
ENSSSCG00000037561	ATP11A	turquoise	0.281429	0.329695	-0.881893	3.02418e-05
ENSSSCG00000003147	CA11	turquoise	0.281178	0.330145	0.444534	0.111259
ENSSSCG00000009188	STPG2	turquoise	0.281118	0.330252	-0.311403	0.278467
ENSSSCG00000015519	RASAL2	turquoise	0.281109	0.330269	-0.968101	1.41998e-08
ENSSSCG00000038397	PTK2	turquoise	-0.280939	0.330574	0.829591	0.000242294
ENSSSCG00000000886	SLC25A3	turquoise	-0.280805	0.330815	0.612668	0.0198396
ENSSSCG00000009519	CLYBL	turquoise	-0.280733	0.330943	0.786961	0.000838064
ENSSSCG00000008693	NOP14	turquoise	-0.280732	0.330945	0.66983	0.00877286
ENSSSCG00000042159		turquoise	0.280526	0.331314	-0.783532	0.000914964
ENSSSCG00000016720	PGAM2	turquoise	0.280093	0.332093	-0.705489	0.00482003
ENSSSCG00000010330	PPIF	turquoise	0.279897	0.332445	-0.914829	4.57739e-06
ENSSSCG00000040698	PRR7	turquoise	0.279708	0.332786	-0.776178	0.00109893
ENSSSCG00000003920		turquoise	-0.279693	0.332814	0.685164	0.00684728
ENSSSCG00000016073	PGAP1	turquoise	0.27967	0.332855	-0.903748	9.30371e-06
ENSSSCG00000010433	SGMS1	turquoise	0.279664	0.332866	-0.961657	4.2236e-08
ENSSSCG00000032994	RNF187	turquoise	-0.279621	0.332943	0.790608	0.000762029
ENSSSCG00000012933	CCDC87	turquoise	0.279582	0.333014	-0.662002	0.00990472
ENSSSCG00000010621	ADD3	turquoise	0.279388	0.333363	-0.708619	0.00455507
ENSSSCG00000042596		turquoise	0.279352	0.333429	-0.9469	2.88468e-07
ENSSSCG00000023793	NUP42	turquoise	-0.279188	0.333724	0.623914	0.0171007
ENSSSCG00000016871	CCL28	turquoise	-0.279011	0.334043	0.855449	9.57525e-05
ENSSSCG00000010493	PDLIM1	turquoise	0.278883	0.334275	-0.892802	1.73263e-05
ENSSSCG00000014127	RASGRF2	turquoise	0.27879	0.334442	-0.407761	0.147825
ENSSSCG00000020808	CCT6A	turquoise	-0.278753	0.334509	0.968333	1.35981e-08
ENSSSCG00000040557	SERTM1	turquoise	-0.278689	0.334624	0.88268	2.91049e-05
ENSSSCG00000009842	CCDC60	turquoise	-0.278646	0.334703	0.832921	0.000216886
ENSSSCG00000020758	NQO2	turquoise	-0.278615	0.334759	0.540683	0.0459
ENSSSCG00000050785		turquoise	-0.278614	0.334761	-0.243125	0.402282
ENSSSCG00000044044		turquoise	0.27861	0.334767	-0.798753	0.000612109
ENSSSCG00000032956	BMERB1	turquoise	0.278399	0.335149	-0.9216	2.8268e-06
ENSSSCG00000010568	NPM3	turquoise	-0.278359	0.335221	0.881725	3.04903e-05
ENSSSCG00000000363	GDF11	turquoise	-0.278358	0.335223	0.900217	1.14578e-05
ENSSSCG00000023307	FBXW11	turquoise	-0.27828	0.335365	0.573117	0.0321587
ENSSSCG00000000943	OTOGL	turquoise	-0.278275	0.335373	-0.484501	0.0791343
ENSSSCG00000014165	TTC37	turquoise	-0.278221	0.335472	0.944886	3.59095e-07
ENSSSCG00000022957	PARP4	turquoise	0.278167	0.335568	-0.884407	2.67295e-05
ENSSSCG00000042123		turquoise	-0.278122	0.33565	0.756203	0.00175101
ENSSSCG00000016033	GULP1	turquoise	0.277868	0.33611	-0.925605	2.08197e-06
ENSSSCG00000004058	EZR	turquoise	0.277796	0.33624	-0.948825	2.32118e-07
ENSSSCG00000000364	SARNP	turquoise	-0.277777	0.336276	0.893597	1.6599e-05
ENSSSCG00000032250	SRRM3	turquoise	0.277714	0.33639	-0.874167	4.34686e-05
ENSSSCG00000003396	CLSTN1	turquoise	0.277684	0.336444	-0.855534	9.54324e-05
ENSSSCG00000025698	SERPINE1	turquoise	-0.277618	0.336564	0.851398	0.000111987
ENSSSCG00000015963	OLA1	turquoise	-0.277589	0.336616	0.95719	8.10132e-08
ENSSSCG00000011538	LMCD1	turquoise	0.277531	0.336721	-0.916308	4.13438e-06
ENSSSCG00000016239	NYAP2	turquoise	-0.27751	0.336759	0.827965	0.000255543
ENSSSCG00000032330	THY1	turquoise	0.277468	0.336834	-0.903556	9.41131e-06
ENSSSCG00000010603	NEURL1	turquoise	0.277332	0.337082	-0.981371	5.79664e-10
ENSSSCG00000037580	ITPRIPL1	turquoise	0.277139	0.337433	-0.937834	7.28158e-07
ENSSSCG00000005457	LPAR1	turquoise	0.277086	0.337528	-0.96461	2.62811e-08
ENSSSCG00000003433	PLOD1	turquoise	-0.277018	0.337652	0.916104	4.19335e-06
ENSSSCG00000023886	RPA3	turquoise	-0.276944	0.337786	0.77034	0.00126505
ENSSSCG00000036152	TSPAN15	turquoise	0.27694	0.337794	-0.950516	1.90439e-07
ENSSSCG00000004545	ANKDD1A	turquoise	0.276923	0.337825	-0.664287	0.00956339
ENSSSCG00000005665	PHYHD1	turquoise	0.27684	0.337975	-0.714903	0.00405753
ENSSSCG00000038491	MEX3B	turquoise	0.276758	0.338124	-0.647942	0.012217
ENSSSCG00000051633		turquoise	0.276533	0.338533	-0.814486	0.00038953
ENSSSCG00000003917	TESK2	turquoise	-0.276252	0.339045	0.767371	0.0013569
ENSSSCG00000039021	LSM2	turquoise	-0.2762	0.339138	0.679992	0.00745575
ENSSSCG00000008930	TMPRSS11F	turquoise	-0.276073	0.339371	0.806281	0.000495526
ENSSSCG00000034297	HES2	turquoise	0.275763	0.339935	-0.9439	3.9856e-07
ENSSSCG00000013835	CASP14	turquoise	0.275718	0.340018	-0.932094	1.22153e-06
ENSSSCG00000004658	FBN1	turquoise	0.275663	0.340118	-0.627245	0.0163474
ENSSSCG00000039946	CD34	turquoise	0.275596	0.34024	-0.875308	4.12634e-05
ENSSSCG00000011965	TMEM45A	turquoise	0.275504	0.340407	-0.911758	5.62297e-06
ENSSSCG00000027898	ATP2B1	turquoise	0.275464	0.34048	-0.936994	7.87824e-07
ENSSSCG00000049608		turquoise	0.275392	0.340611	-0.972601	5.75827e-09
ENSSSCG00000009225	HSD17B11	turquoise	0.274881	0.341544	-0.582905	0.0286888
ENSSSCG00000028297	APH1A	turquoise	0.274576	0.342102	-0.881494	3.0832e-05
ENSSSCG00000040887	HEATR3	turquoise	-0.274434	0.342362	0.868033	5.70408e-05
ENSSSCG00000022250	SPACA9	turquoise	-0.274404	0.342418	0.747691	0.00210838
ENSSSCG00000031380	MARCKSL1	turquoise	-0.274394	0.342435	0.911815	5.602e-06
ENSSSCG00000024484	DEGS1	turquoise	0.274227	0.342741	-0.960088	5.35369e-08
ENSSSCG00000022372	SLC6A14	turquoise	0.273886	0.343367	-0.945926	3.21023e-07
ENSSSCG00000051678		turquoise	0.273597	0.343896	-0.59739	0.0240763
ENSSSCG00000032153	C19orf12	turquoise	-0.273552	0.343979	0.760287	0.00159754
ENSSSCG00000001483	FAM83B	turquoise	0.27343	0.344202	-0.948668	2.36352e-07
ENSSSCG00000000892	HAL	turquoise	0.273425	0.344212	-0.298536	0.299846
ENSSSCG00000032193	NKAIN1	turquoise	-0.273419	0.344223	0.940546	5.60505e-07
ENSSSCG00000006518	HCN3	turquoise	0.273242	0.344548	0.369085	0.194057
ENSSSCG00000004597	AQP9	turquoise	0.273241	0.34455	-0.937235	7.70304e-07
ENSSSCG00000032708	Metazoa_SRP	turquoise	-0.27309	0.344827	0.643662	0.0129969
ENSSSCG00000008909	CLOCK	turquoise	0.272921	0.345138	-0.932146	1.21605e-06
ENSSSCG00000015595	ATF3	turquoise	-0.272878	0.345216	0.956319	9.12565e-08
ENSSSCG00000017330	MAP3K14	turquoise	0.272778	0.345401	-0.860946	7.68315e-05
ENSSSCG00000017706	HEATR9	turquoise	0.272697	0.34555	-0.708782	0.00454159
ENSSSCG00000016002	CCDC141	turquoise	0.27262	0.34569	-0.736093	0.00268579
ENSSSCG00000031818		turquoise	-0.272556	0.34581	0.931801	1.25261e-06
ENSSSCG00000000766	CECR2	turquoise	0.272478	0.345953	-0.936147	8.51916e-07
ENSSSCG00000033574		turquoise	-0.272463	0.34598	0.561537	0.0366553
ENSSSCG00000051030		turquoise	0.272418	0.346063	-0.586739	0.0274087
ENSSSCG00000048604		turquoise	-0.272416	0.346068	0.573406	0.0320522
ENSSSCG00000007749		turquoise	-0.272331	0.346222	0.933589	1.07227e-06
ENSSSCG00000037066	GADD45A	turquoise	-0.272297	0.346287	0.869208	5.42042e-05
ENSSSCG00000008558	AGBL5	turquoise	-0.272262	0.34635	0.304904	0.28915
ENSSSCG00000033514	CRHR2	turquoise	-0.27226	0.346353	0.942271	4.71532e-07
ENSSSCG00000026129	ADGRL3	turquoise	-0.272224	0.346419	0.54237	0.0450947
ENSSSCG00000009395	SETDB2	turquoise	0.27217	0.346519	-0.399539	0.156972
ENSSSCG00000032833	CD320	turquoise	-0.272038	0.346762	0.652366	0.011449
ENSSSCG00000047048		turquoise	0.271643	0.347491	-0.893558	1.6634e-05
ENSSSCG00000025565		turquoise	0.271628	0.347519	-0.442796	0.112832
ENSSSCG00000022869	BCAP29	turquoise	0.271465	0.34782	-0.932357	1.19407e-06
ENSSSCG00000024021		turquoise	-0.271377	0.347983	0.972269	6.18435e-09
ENSSSCG00000023569	FBRSL1	turquoise	0.27127	0.348181	-0.868893	5.49546e-05
ENSSSCG00000025374	DVL3	turquoise	0.271124	0.348449	-0.634172	0.0148621
ENSSSCG00000014149	MEF2C	turquoise	0.271057	0.348574	-0.719129	0.0037477
ENSSSCG00000017429	P3H4	turquoise	-0.270823	0.349006	0.754255	0.00182817
ENSSSCG00000049460		turquoise	-0.270753	0.349135	-0.677047	0.00782047
ENSSSCG00000016556	CEP41	turquoise	0.270716	0.349205	-0.533223	0.0495871
ENSSSCG00000009278	FGF9	turquoise	0.270653	0.349321	-0.966421	1.9249e-08
ENSSSCG00000003731	GAREM1	turquoise	0.270405	0.34978	-0.87674	3.86235e-05
ENSSSCG00000006648	CTSS	turquoise	0.270241	0.350084	-0.89799	1.30159e-05
ENSSSCG00000034350	SERHL2	turquoise	-0.270062	0.350416	0.920274	3.11674e-06
ENSSSCG00000048049		turquoise	-0.269871	0.35077	0.543204	0.0447002
ENSSSCG00000018104	SNORA19	turquoise	-0.269855	0.350799	-0.148823	0.611613
ENSSSCG00000021126	SOSTDC1	turquoise	0.269696	0.351095	-0.903292	9.5611e-06
ENSSSCG00000016278		turquoise	-0.269548	0.351369	-0.514679	0.0596793
ENSSSCG00000038505	MSI2	turquoise	0.269471	0.351511	-0.921607	2.82535e-06
ENSSSCG00000038396		turquoise	0.269212	0.351992	-0.264865	0.360122
ENSSSCG00000005024	PYGL	turquoise	0.269154	0.352101	-0.567808	0.0341662
ENSSSCG00000015241	TMEM45B	turquoise	0.269122	0.352161	-0.969436	1.10181e-08
ENSSSCG00000012874	LTO1	turquoise	0.269115	0.352173	-0.512711	0.0608305
ENSSSCG00000012633	IL13RA1	turquoise	-0.268951	0.352478	0.586946	0.027341
ENSSSCG00000011426	POC1A	turquoise	0.268932	0.352514	-0.906744	7.74702e-06
ENSSSCG00000000248	KRT5	turquoise	0.268884	0.352603	-0.962172	3.89834e-08
ENSSSCG00000045641		turquoise	0.268866	0.352636	-0.799611	0.000597807
ENSSSCG00000041743		turquoise	-0.268821	0.35272	0.472986	0.0876167
ENSSSCG00000049605		turquoise	-0.268738	0.352874	0.364253	0.20041
ENSSSCG00000045709		turquoise	-0.268704	0.352938	0.771278	0.0012371
ENSSSCG00000005266	TMC1	turquoise	-0.268656	0.353026	0.855431	9.58211e-05
ENSSSCG00000024393	B3GNT5	turquoise	0.268594	0.353142	-0.669115	0.00887189
ENSSSCG00000044664		turquoise	-0.268395	0.353513	0.896736	1.39668e-05
ENSSSCG00000002960	RASGRP4	turquoise	0.26812	0.354026	-0.763835	0.00147313
ENSSSCG00000011511	FRMD4B	turquoise	-0.268085	0.354091	0.71011	0.00443291
ENSSSCG00000002341	PAPLN	turquoise	0.268014	0.354223	-0.977126	1.96877e-09
ENSSSCG00000007991	WDR90	turquoise	0.267988	0.354271	-0.710412	0.00440848
ENSSSCG00000009364	FREM2	turquoise	-0.267874	0.354484	0.865699	6.30342e-05
ENSSSCG00000010507	TLL2	turquoise	-0.267833	0.354561	0.943348	4.22149e-07
ENSSSCG00000031898	CALHM5	turquoise	0.267762	0.354694	-0.857418	8.85821e-05
ENSSSCG00000007845	UQCRC2	turquoise	-0.267761	0.354694	0.926526	1.93597e-06
ENSSSCG00000011477	ACOX2	turquoise	0.267704	0.354801	-0.970045	9.77812e-09
ENSSSCG00000008467	EML4	turquoise	-0.267689	0.35483	0.908101	7.11635e-06
ENSSSCG00000034027	ZNF544	turquoise	0.267585	0.355024	-0.946824	2.90927e-07
ENSSSCG00000002536		turquoise	0.267511	0.355162	-0.584229	0.0282419
ENSSSCG00000036115		turquoise	0.267281	0.355592	-0.701509	0.00517428
ENSSSCG00000000413	MYO1A	turquoise	0.267271	0.355611	-0.17227	0.555922
ENSSSCG00000011979	GPR15	turquoise	-0.266979	0.356156	0.875808	4.03254e-05
ENSSSCG00000001052	PHACTR1	turquoise	0.266846	0.356405	-0.935282	9.21783e-07
ENSSSCG00000016942	CWC27	turquoise	-0.266786	0.356517	0.722287	0.00352848
ENSSSCG00000010012	SLC35E4	turquoise	0.266575	0.356912	-0.984186	2.18222e-10
ENSSSCG00000015297	ADAM22	turquoise	-0.266325	0.357381	0.888159	2.21141e-05
ENSSSCG00000006666	SV2A	turquoise	0.266285	0.357455	-0.428428	0.126414
ENSSSCG00000006682		turquoise	0.266118	0.357768	-0.92927	1.55015e-06
ENSSSCG00000039926		turquoise	-0.265869	0.358236	-0.480623	0.0819238
ENSSSCG00000010275	PCBD1	turquoise	0.265857	0.358259	-0.938531	6.81609e-07
ENSSSCG00000010683	GRK5	turquoise	-0.265828	0.358313	0.97958	1.00159e-09
ENSSSCG00000010175	GNPAT	turquoise	-0.26581	0.358347	0.900989	1.09554e-05
ENSSSCG00000000260	SOAT2	turquoise	0.265673	0.358603	-0.602849	0.0224914
ENSSSCG00000011531		turquoise	0.26564	0.358665	0.460207	0.0977533
ENSSSCG00000008433	STPG4	turquoise	0.265572	0.358793	-0.884118	2.71164e-05
ENSSSCG00000013983	JMJD4	turquoise	-0.265345	0.359219	0.896457	1.41859e-05
ENSSSCG00000029985	ARL10	turquoise	-0.265159	0.359569	-0.394319	0.162968
ENSSSCG00000016226		turquoise	-0.265026	0.35982	0.912868	5.22446e-06
ENSSSCG00000002671	ATP2C2	turquoise	0.265015	0.35984	-0.971345	7.51478e-09
ENSSSCG00000008749	SLIT2	turquoise	-0.264749	0.360341	0.503956	0.0661469
ENSSSCG00000011662	COPB2	turquoise	-0.26457	0.360677	0.822767	0.000301888
ENSSSCG00000000939	ACSS3	turquoise	0.264553	0.360709	-0.563545	0.0358445
ENSSSCG00000017342	KIF18B	turquoise	-0.264455	0.360894	0.558764	0.0377979
ENSSSCG00000010337	MAT1A	turquoise	0.264371	0.361052	-0.982446	4.06812e-10
ENSSSCG00000039339		turquoise	-0.26426	0.361261	0.832677	0.00021867
ENSSSCG00000017069	LARP1	turquoise	-0.264245	0.36129	-0.372761	0.189309
ENSSSCG00000034647	MRPS15	turquoise	-0.264036	0.361683	0.944911	3.58121e-07
ENSSSCG00000006472	CRABP2	turquoise	0.263994	0.361764	-0.882128	2.98985e-05
ENSSSCG00000027738	LRRFIP2	turquoise	0.263988	0.361773	-0.901391	1.07004e-05
ENSSSCG00000011020	JCAD	turquoise	-0.263973	0.361802	0.897899	1.30828e-05
ENSSSCG00000006588		turquoise	-0.263738	0.362246	0.985559	1.26952e-10
ENSSSCG00000014989	DCUN1D5	turquoise	-0.26361	0.362488	0.912169	5.47288e-06
ENSSSCG00000028376		turquoise	0.263593	0.362519	-0.254371	0.380163
ENSSSCG00000014567	TRIM66	turquoise	0.263381	0.362921	-0.668783	0.00891825
ENSSSCG00000009513	SLC15A1	turquoise	0.263286	0.363099	-0.961282	4.4739e-08
ENSSSCG00000025468		turquoise	-0.262967	0.363704	0.736541	0.00266136
ENSSSCG00000038216		turquoise	-0.262824	0.363974	-0.43621	0.118928
ENSSSCG00000046921		turquoise	-0.262789	0.36404	0.587831	0.0270521
ENSSSCG00000050684		turquoise	-0.262611	0.364377	-0.32358	0.259089
ENSSSCG00000002505	PAPOLA	turquoise	-0.262433	0.364715	0.925334	2.1267e-06
ENSSSCG00000014036	TMED9	turquoise	0.262426	0.364727	-0.622469	0.0174355
ENSSSCG00000033560		turquoise	-0.262315	0.364938	0.948018	2.54535e-07
ENSSSCG00000004154	TNFAIP3	turquoise	0.262289	0.364987	-0.882894	2.88007e-05
ENSSSCG00000007342	RPRD1B	turquoise	-0.262287	0.364991	0.794773	0.000682081
ENSSSCG00000013392	COPB1	turquoise	-0.262208	0.365141	0.926357	1.96212e-06
ENSSSCG00000034440	MMP28	turquoise	-0.262108	0.365331	0.972806	5.50653e-09
ENSSSCG00000051628		turquoise	0.262099	0.365347	-0.812985	0.000407415
ENSSSCG00000006774	PPM1J	turquoise	-0.262097	0.365352	0.952914	1.42098e-07
ENSSSCG00000050602		turquoise	0.262012	0.365512	-0.638848	0.0139192
ENSSSCG00000049720		turquoise	0.261953	0.365624	-0.589155	0.0266243
ENSSSCG00000011850		turquoise	-0.261795	0.365923	0.891792	1.82875e-05
ENSSSCG00000040025	NANOS1	turquoise	0.261664	0.366172	-0.512238	0.0611099
ENSSSCG00000017567	RSAD1	turquoise	-0.261552	0.366385	0.559314	0.0375691
ENSSSCG00000013733	BEST2	turquoise	-0.26129	0.366884	0.735231	0.00273319
ENSSSCG00000023235	MAN1C1	turquoise	-0.261124	0.367199	0.973943	4.27221e-09
ENSSSCG00000047463		turquoise	0.261108	0.367229	0.70476	0.00488347
ENSSSCG00000048789		turquoise	-0.260995	0.367445	0.832877	0.000217208
ENSSSCG00000031262	TXNIP	turquoise	0.260978	0.367477	-0.91784	3.713e-06
ENSSSCG00000015072	PCSK7	turquoise	0.260704	0.367998	-0.839087	0.000175543
ENSSSCG00000049883		turquoise	-0.260648	0.368105	0.452091	0.104597
ENSSSCG00000013938	GATAD2A	turquoise	0.260278	0.36881	-0.718722	0.00377666
ENSSSCG00000006696	GJA5	turquoise	0.260199	0.368959	-0.929605	1.50764e-06
ENSSSCG00000014183	SLCO6A1	turquoise	-0.259942	0.369451	-0.627558	0.016278
ENSSSCG00000008058	KCTD5	turquoise	0.25974	0.369835	-0.893734	1.6476e-05
ENSSSCG00000044632		turquoise	-0.259718	0.369878	0.913106	5.14217e-06
ENSSSCG00000021813	SLC26A3	turquoise	0.25953	0.370238	-0.593882	0.0251383
ENSSSCG00000028178	FH	turquoise	-0.259349	0.370583	0.892563	1.75497e-05
ENSSSCG00000044952	NLRX1	turquoise	0.259233	0.370805	-0.911223	5.82378e-06
ENSSSCG00000010599	PDCD11	turquoise	-0.259171	0.370922	0.855958	9.38557e-05
ENSSSCG00000008823	SLC10A4	turquoise	-0.259074	0.371109	0.973117	5.1433e-09
ENSSSCG00000022901	KLHDC3	turquoise	0.259033	0.371187	-0.792298	0.000728731
ENSSSCG00000038184	ACBD7	turquoise	-0.258955	0.371336	0.539688	0.0463796
ENSSSCG00000035859	WNT5A	turquoise	-0.258892	0.371456	0.871186	4.96906e-05
ENSSSCG00000027820	CD200	turquoise	0.258738	0.371751	-0.962417	3.75157e-08
ENSSSCG00000047202		turquoise	-0.258571	0.372071	0.716464	0.0039408
ENSSSCG00000049088		turquoise	-0.258345	0.372504	0.444626	0.111176
ENSSSCG00000017251	SOX9	turquoise	0.258316	0.372559	-0.930989	1.34246e-06
ENSSSCG00000008836	SCFD2	turquoise	-0.257728	0.373688	0.816503	0.0003665
ENSSSCG00000025252	PEX5	turquoise	0.257717	0.373709	-0.915012	4.52067e-06
ENSSSCG00000012031	CLDN17	turquoise	0.257576	0.37398	-0.971814	6.81319e-09
ENSSSCG00000039561		turquoise	-0.257566	0.373999	0.983414	2.90076e-10
ENSSSCG00000046754		turquoise	-0.257328	0.374456	0.917254	3.86979e-06
ENSSSCG00000006590	S100A8	turquoise	-0.257286	0.374536	0.938411	6.89462e-07
ENSSSCG00000018942		turquoise	-0.257281	0.374547	0.490185	0.0751687
ENSSSCG00000038745	SERPINF2	turquoise	0.257073	0.374946	0.213983	0.462596
ENSSSCG00000021569	MMP25	turquoise	0.256939	0.375204	-0.794536	0.000686436
ENSSSCG00000035352		turquoise	0.256765	0.375538	-0.692998	0.00599982
ENSSSCG00000003189	PRMT1	turquoise	-0.256742	0.375583	0.866267	6.15319e-05
ENSSSCG00000024257	CEMIP2	turquoise	-0.256661	0.375738	0.764124	0.00146335
ENSSSCG00000025174	WDFY1	turquoise	0.256527	0.375997	-0.866123	6.19092e-05
ENSSSCG00000009845	SRRM4	turquoise	0.256377	0.376286	-0.570023	0.0333178
ENSSSCG00000011313	LIMD1	turquoise	0.256231	0.376567	-0.860264	7.89967e-05
ENSSSCG00000051668		turquoise	0.256139	0.376745	-0.494648	0.0721551
ENSSSCG00000005269	TRPM6	turquoise	0.256114	0.376793	-0.890663	1.9413e-05
ENSSSCG00000036727		turquoise	-0.256113	0.376795	0.22179	0.446026
ENSSSCG00000013720	MAN2B1	turquoise	-0.255823	0.377353	0.95491	1.10066e-07
ENSSSCG00000006624	SELENBP1	turquoise	-0.255767	0.377463	0.876814	3.84919e-05
ENSSSCG00000013260	MDK	turquoise	-0.25568	0.377631	0.910313	6.17893e-06
ENSSSCG00000009957	MYO18B	turquoise	-0.255411	0.37815	0.462186	0.0961328
ENSSSCG00000025674	SNRNP27	turquoise	-0.255238	0.378484	0.77667	0.00108576
ENSSSCG00000006116	SLC26A7	turquoise	0.255156	0.378643	-0.921444	2.85963e-06
ENSSSCG00000025357	LDAH	turquoise	-0.255092	0.378766	0.77903	0.00102438
ENSSSCG00000015287	TMCC2	turquoise	0.254703	0.379519	-0.800356	0.000585603
ENSSSCG00000000869	UTP20	turquoise	0.254574	0.37977	-0.763226	0.00149391
ENSSSCG00000028108	ASAP3	turquoise	0.254315	0.380271	-0.761911	0.00153962
ENSSSCG00000002714	WDR59	turquoise	-0.25425	0.380397	0.886003	2.46783e-05
ENSSSCG00000017798		turquoise	0.254212	0.38047	-0.869485	5.35536e-05
ENSSSCG00000023130	ASCC1	turquoise	-0.253996	0.380889	0.787567	0.000825018
ENSSSCG00000025203	KNOP1	turquoise	-0.253587	0.381684	0.780755	0.000981278
ENSSSCG00000032231		turquoise	-0.253538	0.381777	0.571184	0.0328793
ENSSSCG00000036106	TUBG1	turquoise	-0.253485	0.38188	0.871119	4.98373e-05
ENSSSCG00000025156	BRWD3	turquoise	-0.253452	0.381945	0.929874	1.47436e-06
ENSSSCG00000025087	ASPH	turquoise	-0.253385	0.382075	0.894362	1.59226e-05
ENSSSCG00000005041	FERMT2	turquoise	0.253376	0.382092	-0.890154	1.99395e-05
ENSSSCG00000044408		turquoise	-0.253302	0.382236	0.419957	0.13492
ENSSSCG00000039673	ASB16	turquoise	0.253279	0.382282	-0.830116	0.000238135
ENSSSCG00000034364	SPECC1	turquoise	-0.25327	0.382299	0.939157	6.41851e-07
ENSSSCG00000014602	OR10A4	turquoise	-0.25318	0.382473	-0.642937	0.0131327
ENSSSCG00000035335	FGL1	turquoise	-0.253031	0.382763	-0.363123	0.201916
ENSSSCG00000009963	TPST2	turquoise	0.252933	0.382954	-0.490364	0.0750461
ENSSSCG00000050498	PURA	turquoise	0.252924	0.382971	-0.655663	0.0109012
ENSSSCG00000006248	MOS	turquoise	0.252859	0.383098	-0.21691	0.45635
ENSSSCG00000035105		turquoise	-0.252776	0.383258	0.964759	2.56305e-08
ENSSSCG00000036618		turquoise	0.252751	0.383307	-0.457186	0.100263
ENSSSCG00000005191	MPDZ	turquoise	0.252666	0.383473	-0.849698	0.000119433
ENSSSCG00000029331	PALLD	turquoise	0.252485	0.383825	-0.966016	2.06692e-08
ENSSSCG00000008305	SMYD5	turquoise	-0.252478	0.383839	0.660941	0.0100664
ENSSSCG00000028092		turquoise	0.252446	0.383901	-0.986062	1.02742e-10
ENSSSCG00000033373	COMMD8	turquoise	-0.252292	0.384201	0.913229	5.10005e-06
ENSSSCG00000016549	MKLN1	turquoise	-0.252212	0.384357	0.933826	1.05012e-06
ENSSSCG00000022300	MAT2A	turquoise	-0.252178	0.384423	0.659074	0.0103559
ENSSSCG00000013754		turquoise	0.25215	0.384479	-0.889637	2.04852e-05
ENSSSCG00000012424	ABCB7	turquoise	-0.251948	0.384873	0.804457	0.000521979
ENSSSCG00000048476		turquoise	-0.251884	0.384998	-0.699404	0.00536957
ENSSSCG00000031940	GAS2	turquoise	0.25183	0.385101	-0.772386	0.0012047
ENSSSCG00000014959	PIWIL4	turquoise	0.251804	0.385153	-0.479082	0.0830506
ENSSSCG00000004600	TCF12	turquoise	0.251648	0.385457	-0.959191	6.10548e-08
ENSSSCG00000023837	WFDC1	turquoise	0.251497	0.385752	-0.96342	3.19657e-08
ENSSSCG00000016370	SEPTIN2	turquoise	0.251464	0.385816	-0.943965	3.95835e-07
ENSSSCG00000018450	SNORD100	turquoise	-0.251443	0.385858	0.780344	0.00099142
ENSSSCG00000038768	GPR37L1	turquoise	0.2514	0.385941	-0.683012	0.00709551
ENSSSCG00000008105	ANAPC1	turquoise	-0.251355	0.386029	0.863124	7.02319e-05
ENSSSCG00000033948	ssc-mir-33b	turquoise	0.251323	0.386092	-0.38838	0.169971
ENSSSCG00000005631	FAM102A	turquoise	0.251296	0.386145	-0.967505	1.5848e-08
ENSSSCG00000026506	RALGAPA2	turquoise	-0.251171	0.386389	0.873547	4.47067e-05
ENSSSCG00000008187	CRACDL	turquoise	0.25116	0.38641	-0.93337	1.09312e-06
ENSSSCG00000032950	SLC25A34	turquoise	-0.251068	0.38659	0.673972	0.00821594
ENSSSCG00000005743	VAV2	turquoise	-0.25106	0.386607	0.796585	0.000649467
ENSSSCG00000002287	PALS1	turquoise	0.250965	0.386792	-0.943093	4.33453e-07
ENSSSCG00000008550	SLC5A6	turquoise	-0.250833	0.387049	0.924349	2.2956e-06
ENSSSCG00000031579	PCP4L1	turquoise	0.250821	0.387073	-0.949411	2.16914e-07
ENSSSCG00000043143		turquoise	0.250787	0.38714	-0.714253	0.00410691
ENSSSCG00000042824		turquoise	0.250621	0.387465	-0.224376	0.440601
ENSSSCG00000005076	KIAA0586	turquoise	0.250598	0.38751	0.691737	0.00613042
ENSSSCG00000042253		turquoise	-0.250516	0.387669	-0.463996	0.0946667
ENSSSCG00000010654	ATRNL1	turquoise	0.25048	0.38774	-0.606532	0.0214671
ENSSSCG00000042438		turquoise	0.250373	0.387951	-0.93153	1.28207e-06
ENSSSCG00000010276	UNC5B	turquoise	0.250317	0.388059	-0.441219	0.114272
ENSSSCG00000017614	TRIM25	turquoise	0.250204	0.388282	-0.956126	9.36613e-08
ENSSSCG00000001563	STK38	turquoise	-0.25	0.38868	0.880359	3.25648e-05
ENSSSCG00000033844	CYP1B1	turquoise	-0.249846	0.388982	0.910842	5.97026e-06
ENSSSCG00000044054		turquoise	-0.249795	0.389083	-0.438321	0.11695
ENSSSCG00000037595	AP3S1	turquoise	-0.249707	0.389255	0.872102	4.77064e-05
ENSSSCG00000022101	BRCA1	turquoise	-0.249552	0.389561	0.757547	0.00169926
[truncated: 2,200 more rows]
