# Supplementary material for: Altered hair root gene expression profiles highlight calcium signaling and lipid metabolism pathways to be associated with curly hair initiation and maintenance in Mangalitza pigs
Source: Front Genet. 2023 Jun 7;14:1184015. doi: 10.3389/fgene.2023.1184015 (PMC10282778; doi:10.3389/fgene.2023.1184015)
Supplement: Supplementary file 12 [file Table5.XLSX]

## Sheet: A
Table S5 - DAVID functional analysis for CvsSt dataset (A) DAVID gene functional classification for the differentially expressed genes. The groups are represented by their enrichment scores, gene IDs and names. (B) Functional annotation of significantly enriched terms. The list of terms identified with DAVID functional annotation (enrichment p-value < 0.05) is grouped based on analysis type and d…
Gene Group 1	Enrichment Score: 11.033447353081753
Ensembl ID	Gene Name
100736722	neurexophilin 3(NXPH3)
102160196	family with sequence similarity 107 member B(FAM107B)
100270814	C1q and TNF related 3(C1QTNF3)
100525890	golgi associated kinase 1A(GASK1A)
Gene Group 2	Enrichment Score: 8.188356796061884
Ensembl ID	Gene Name
100156059	keratin 77(KRT77)
100524022	keratin, type II cuticular Hb5(LOC100524022)
100525573	keratin, type II cuticular Hb5-like(LOC100525573)
100620983	lamin B2(LMNB2)
106506651	keratin 71(KRT71)
100621639	keratin, type II cuticular Hb6-like(LOC100621639)
733618	keratin 72(KRT72)
106507258	keratin, type II cuticular Hb6(LOC106507258)
100523123	keratin, type II cuticular Hb1(LOC100523123)
100521759	beaded filament structural protein 1(BFSP1)
100515506	keratin 15(KRT15)
100153933	nestin(NES)
100524337	keratin 25(KRT25)
100525745	keratin 75(KRT75)
110260666	keratin 78(KRT78)
100523817	keratin 39(KRT39)
100514792	keratin 35(KRT35)
100513946	keratin 31(KRT31)
110256011	keratin 40(KRT40)
100521040	keratin 27(KRT27)
100523670	keratin, type II microfibrillar, component 7C(LOC100523670)
100514599	keratin 32(KRT32)
100514127	keratin 34(KRT34)
100514315	keratin 36(KRT36)
100511256	keratin 74(KRT74)
100523992	keratin 26(KRT26)
100621844	keratin, type II microfibrillar, component 7C-like(LOC100621844)
102162785	keratin, type I cuticular Ha8(LOC102162785)
100523843	keratin 82(KRT82)
100520694	keratin 28(KRT28)
100623387	keratin 33A(KRT33A)
100622023	keratin 84(KRT84)
100516036	keratin, type I cuticular Ha3-II(LOC100516036)
Gene Group 3	Enrichment Score: 6.165972811676422
Ensembl ID	Gene Name
448809	collagen type X alpha 1 chain(COL10A1)
100217378	C1q and TNF related 2(C1QTNF2)
100154062	olfactomedin like 2A(OLFML2A)
100270814	C1q and TNF related 3(C1QTNF3)
445461	complement C1q A chain(C1QA)
100738874	complement C1q like 2(C1QL2)
100522569	complement C1q and tumor necrosis factor-related protein 9(LOC100522569)
Gene Group 4	Enrichment Score: 6.117291406221718
Ensembl ID	Gene Name
100158244	cysteine-rich secretory protein 3(CRISP3)
100155196	R3H domain containing like(R3HDML)
100515356	GLI pathogenesis related 2(GLIPR2)
100625354	cysteine rich secretory protein LCCL domain containing 2(CRISPLD2)
Gene Group 5	Enrichment Score: 5.596831278272807
Ensembl ID	Gene Name
100524773	low-density lipoprotein receptor-related protein 2-like(LOC100524773)
100737305	astrotactin 1(ASTN1)
100152718	von Willebrand factor A domain containing 2(VWA2)
110259313	neurocan(NCAN)
100627880	slit guidance ligand 1(SLIT1)
100524621	signal peptide, CUB domain and EGF like domain containing 1(SCUBE1)
100518417	adhesion G protein-coupled receptor E2-like(LOC100518417)
100621722	fibulin 2(FBLN2)
100510939	matrilin 4(MATN4)
100513005	thrombospondin 4(THBS4)
100157589	tolloid like 2(TLL2)
100037974	cartilage acidic protein 1(CRTAC1)
100738368	fibrillin 3(FBN3)
100156461	bone morphogenetic protein 1(BMP1)
100521556	stabilin 2(STAB2)
100155660	CD93 molecule(CD93)
102167492	proline rich membrane anchor 1(PRIMA1)
100511351	nidogen 1(NID1)
100522865	shisa like 1(SHISAL1)
100512803	von Willebrand factor D and EGF domains(VWDE)
100522060	von Willebrand factor C and EGF domains(VWCE)
100525348	adhesion G protein-coupled receptor L4(ADGRL4)
100519144	fibulin 1(FBLN1)
100511434	EGF like domain multiple 7(EGFL7)
100624277	matrilin 1(MATN1)
100513121	teneurin transmembrane protein 2(TENM2)
100525059	hedgehog interacting protein(HHIP)
100516174	sushi domain containing 1(SUSD1)
Gene Group 6	Enrichment Score: 5.355084154758602
Ensembl ID	Gene Name
100154062	olfactomedin like 2A(OLFML2A)
100519117	elastin microfibril interfacer 3(EMILIN3)
100620523	olfactomedin 1(OLFM1)
100156452	olfactomedin like 2B(OLFML2B)
Gene Group 7	Enrichment Score: 5.080143879615518
Ensembl ID	Gene Name
100620394	collagen type XV alpha 1 chain(COL15A1)
100512751	collagen type XIX alpha 1 chain(COL19A1)
100520915	collagen type XI alpha 2 chain(COL11A2)
100517188	collagen alpha-4(VI) chain-like(LOC100517188)
100737666	collagen type XVI alpha 1 chain(COL16A1)
102159686	collagen type XXVII alpha 1 chain(COL27A1)
448809	collagen type X alpha 1 chain(COL10A1)
100101552	collagen type VI alpha 2 chain(COL6A2)
100623720	collagen alpha-1(VI) chain(LOC100623720)
100510974	collagen type XXVIII alpha 1 chain(COL28A1)
100101551	collagen type VI alpha 3 chain(COL6A3)
100158059	collagen type XIV alpha 1 chain(COL14A1)
Gene Group 8	Enrichment Score: 4.868695299191643
Ensembl ID	Gene Name
102163757	calcineurin like EF-hand protein 2(CHP2)
100511942	protein phosphatase with EF-hand domain 2(PPEF2)
100626194	NKD inhibitor of WNT signaling pathway 1(NKD1)
100144630	FKBP prolyl isomerase 7(FKBP7)
100154311	trichohyalin like 1(TCHHL1)
100519360	myosin light chain 10(MYL10)
100155533	repetin(RPTN)
100524248	potassium voltage-gated channel interacting protein 3(KCNIP3)
414905	troponin C2, fast skeletal type(TNNC2)
100153840	reticulocalbin 2(RCN2)
100511038	FKBP prolyl isomerase 10(FKBP10)
100157925	S100 calcium binding protein A3(S100A3)
100737617	calcium and integrin binding family member 4(CIB4)
100517656	calpain 12(CAPN12)
100155189	tescalcin(TESC)
100156785	neurocalcin delta(NCALD)
100153398	EF-hand domain family member D1(EFHD1)
100625935	calcium release activated channel regulator 2A(CRACR2A)
100516001	oncomodulin(OCM)
102167816	guanylate cyclase activator 1B(GUCA1B)
100511535	EF-hand calcium binding domain 12(EFCAB12)
100154709	cornulin(CRNN)
100511435	calcium release activated channel regulator 2B(CRACR2B)
100127489	S100 calcium binding protein A9(S100A9)
100127488	S100 calcium binding protein A8(S100A8)
100620656	N-terminal EF-hand calcium binding protein 3(NECAB3)
100519888	S100 calcium binding protein Z(S100Z)
100737216	calcyphosine 2(CAPS2)
Gene Group 9	Enrichment Score: 4.593970398099571
Ensembl ID	Gene Name
110260930	brain expressed associated with NEDD4 1(BEAN1)
100623214	DLG associated protein 3(DLGAP3)
100523904	pleckstrin homology like domain family A member 1(PHLDA1)
100154145	NUT midline carcinoma family member 1(NUTM1)
Gene Group 10	Enrichment Score: 4.588727973539142
Ensembl ID	Gene Name
100737676	SH2 domain-containing protein 4A-like(LOC100737676)
100049698	synuclein alpha interacting protein(SNCAIP)
100510894	junction mediating and regulatory protein, p53 cofactor(JMY)
100153151	sorbin and SH3 domain containing 1(SORBS1)
100152369	PALM2-AKAP2 fusion(PALM2AKAP2)
100511535	EF-hand calcium binding domain 12(EFCAB12)
106504183	leukocyte receptor cluster member 8(LENG8)
100155608	TSC22 domain family member 2(TSC22D2)
100152823	tubulin tyrosine ligase like 11(TTLL11)
100513463	actin filament associated protein 1 like 1(AFAP1L1)
100623172	glycosyltransferase 1 domain containing 1(GLT1D1)
110260930	brain expressed associated with NEDD4 1(BEAN1)
100524363	proline rich 16(PRR16)
100519232	KIAA1549(KIAA1549)
100522865	shisa like 1(SHISAL1)
Gene Group 11	Enrichment Score: 4.334835237841388
Ensembl ID	Gene Name
100152319	coiled-coil domain containing 186(CCDC186)
100518639	ectopic P-granules 5 autophagy tethering factor(EPG5)
100515691	SPHK1 interactor, AKAP domain containing(SPHKAP)
397661	cAMP-dependent protein kinase inhibitor gamma(PKIG)
100153739	coiled-coil domain containing 13(CCDC13)
100627409	forkhead associated phosphopeptide binding domain 1(FHAD1)
100519772	bridging integrator 2(BIN2)
100523191	immunity related GTPase Q(IRGQ)
102159471	formin 1(FMN1)
100512361	PTPRF interacting protein alpha 4(PPFIA4)
100512640	ITPR interacting domain containing 1(ITPRID1)
100153820	BEN domain containing 6(BEND6)
100525364	family with sequence similarity 13 member C(FAM13C)
100624544	proline rich 11(PRR11)
100049698	synuclein alpha interacting protein(SNCAIP)
100153151	sorbin and SH3 domain containing 1(SORBS1)
106504183	leukocyte receptor cluster member 8(LENG8)
100737676	SH2 domain-containing protein 4A-like(LOC100737676)
100621868	GULP PTB domain containing engulfment adaptor 1(GULP1)
100523255	KN motif and ankyrin repeat domains 4(KANK4)
100155794	leucine rich repeats and calponin homology domain containing 2(LRCH2)
100624903	transforming acidic coiled-coil containing protein 1(TACC1)
100152369	PALM2-AKAP2 fusion(PALM2AKAP2)
100513463	actin filament associated protein 1 like 1(AFAP1L1)
100525811	dynein axonemal assembly factor 8(DNAAF8)
100126239	phosphatase and actin regulator 3(PHACTR3)
100522673	PHD finger protein 21B(PHF21B)
100156351	GTPase activating Rap/RanGAP domain like 3(GARNL3)
110261120	crystallin beta-gamma domain containing 2(CRYBG2)
100524854	CXXC finger protein 5(CXXC5)
100511173	DLG associated protein 5(DLGAP5)
100521810	CXXC finger protein 4(CXXC4)
100520570	microtubule crosslinking factor 1(MTCL1)
100521520	coiled-coil domain containing 92(CCDC92)
100626399	sorting nexin 29(SNX29)
100627254	ELKS/RAB6-interacting/CAST family member 2(ERC2)
100511256	keratin 74(KRT74)
100520369	activating transcription factor 7 interacting protein 2(ATF7IP2)
100624964	Janus kinase and microtubule interacting protein 3(JAKMIP3)
100524547	SH3 binding domain protein 5 like(SH3BP5L)
100513622	MYCBP associated protein(MYCBPAP)
100512954	CAP-Gly domain containing linker protein 2(CLIP2)
100623817	TBC1 domain family member 30(TBC1D30)
100153566	DnaJ heat shock protein family (Hsp40) member C12(DNAJC12)
100037285	neuronal regeneration related protein(NREP)
100620202	neuronal tyrosine-phosphorylated phosphoinositide-3-kinase adaptor 2(NYAP2)
Gene Group 12	Enrichment Score: 4.287269044408652
Ensembl ID	Gene Name
100512873	antileukoproteinase(LOC100512873)
100155625	WAP four-disulfide core domain 3(WFDC3)
396757	peptidase inhibitor 3(PI3)
396987	WAP four-disulfide core domain 2(WFDC2)
396886	secretory leukocyte peptidase inhibitor(SLPI)
100739507	WAP four-disulfide core domain protein 5-like(LOC100739507)
Gene Group 13	Enrichment Score: 4.087145735106529
Ensembl ID	Gene Name
100038010	chemokine (C-C motif) ligand 11(CCL11)
396880	C-X-C motif chemokine ligand 8(CXCL8)
100516016	C-C motif chemokine ligand 22(CCL22)
100516039	C-C motif chemokine 23(LOC100516039)
445453	C-C motif chemokine ligand 27(CCL27)
396668	C-C motif chemokine ligand 4(CCL4)
100310829	C-C motif chemokine ligand 1(CCL1)
414904	chemokine (C-X-C motif) ligand 2(CXCL2)
397422	chemokine (C-C motif) ligand 2(CCL2)
494019	C-X-C motif chemokine ligand 10(CXCL10)
396613	C-C motif chemokine ligand 5(CCL5)
448799	C-C motif chemokine ligand 25(CCL25)
Gene Group 14	Enrichment Score: 3.997798322669561
Ensembl ID	Gene Name
100126276	Wnt family member 10B(WNT10B)
100511782	frizzled class receptor 10(FZD10)
100521912	Wnt family member 11(WNT11)
100622044	Wnt family member 6(WNT6)
100519512	Wnt family member 3(WNT3)
100623646	Wnt family member 10A(WNT10A)
100513655	Wnt family member 8B(WNT8B)
Gene Group 15	Enrichment Score: 3.926321493470752
Ensembl ID	Gene Name
100524417	thrombospondin type 1 domain containing 4(THSD4)
102160867	ADAM metallopeptidase with thrombospondin type 1 motif 17(ADAMTS17)
100628047	ADAMTS like 2(ADAMTSL2)
100514105	matrix metallopeptidase 15(MMP15)
100154062	olfactomedin like 2A(OLFML2A)
100627950	ADAM metallopeptidase with thrombospondin type 1 motif 13(ADAMTS13)
102167408	ADAM metallopeptidase with thrombospondin type 1 motif 18(ADAMTS18)
396939	matrix metallopeptidase 20(MMP20)
100624519	ADAM metallopeptidase with thrombospondin type 1 motif 10(ADAMTS10)
Gene Group 16	Enrichment Score: 3.467753555480367
Ensembl ID	Gene Name
100511003	ubiquitin like with PHD and ring finger domains 1(UHRF1)
100521810	CXXC finger protein 4(CXXC4)
100524764	zinc finger CW-type and PWWP domain containing 2(ZCWPW2)
100524854	CXXC finger protein 5(CXXC5)
100151954	bromodomain adjacent to zinc finger domain 1A(BAZ1A)
100156795	PDZ domain containing ring finger 4(PDZRN4)
100154961	zinc finger FYVE-type containing 19(ZFYVE19)
100156555	double PHD fingers 3(DPF3)
100151894	zinc finger matrin-type 1(ZMAT1)
100514968	zinc finger SWIM-type containing 5(ZSWIM5)
100517129	nuclear body protein SP140-like protein(LOC100517129)
100144512	zinc finger protein 831(ZNF831)
100519901	zinc finger protein 428(ZNF428)
100522673	PHD finger protein 21B(PHF21B)
100737978	IKAROS family zinc finger 2(IKZF2)
100626865	ring finger protein 25(RNF25)
102165175	regulating synaptic membrane exocytosis 2(RIMS2)
100524028	zinc finger MYND-type containing 12(ZMYND12)
100151740	FYVE and coiled-coil domain autophagy adaptor 1(FYCO1)
100152632	zinc finger protein 185 with LIM domain(ZNF185)
100174955	Kruppel like factor 12(KLF12)
Gene Group 17	Enrichment Score: 3.441320550810687
Ensembl ID	Gene Name
110261633	serpin B3-like(LOC110261633)
100152588	serpin family B member 7(SERPINB7)
780402	serpin family F member 1(SERPINF1)
100153783	ovalbumin(LOC100153783)
110261638	serpin family B member 13(SERPINB13)
100125972	serpin family C member 1(SERPINC1)
Gene Group 18	Enrichment Score: 3.041794332899349
Ensembl ID	Gene Name
100623356	spindle and kinetochore associated complex subunit 3(SKA3)
100158166	refilin A(RFLNA)
100624903	transforming acidic coiled-coil containing protein 1(TACC1)
100522845	thymosin beta 15A(TMSB15A)
100525848	thymosin beta 15B(TMSB15B)
100525308	IQ motif containing D(IQCD)
100525811	dynein axonemal assembly factor 8(DNAAF8)
100154583	cell division cycle associated 7(CDCA7)
Gene Group 19	Enrichment Score: 3.007468577766142
Ensembl ID	Gene Name
100049698	synuclein alpha interacting protein(SNCAIP)
100623422	ArfGAP with coiled-coil, ankyrin repeat and PH domains 1(ACAP1)
100512361	PTPRF interacting protein alpha 4(PPFIA4)
100524247	CASK interacting protein 1(CASKIN1)
102161679	myosin XVI(MYO16)
100521849	protein phosphatase 1 regulatory subunit 13B(PPP1R13B)
100511459	oxysterol binding protein like 1A(OSBPL1A)
100523255	KN motif and ankyrin repeat domains 4(KANK4)
100512251	USH1 protein network component sans(USH1G)
100513190	ankyrin repeat and SOCS box containing 15(ASB15)
100158057	ankyrin repeat and SOCS box containing 9(ASB9)
100515210	cyclin dependent kinase inhibitor 2C(CDKN2C)
100514598	ankyrin repeat and SOCS box containing 16(ASB16)
100157679	ankyrin 1(ANK1)
110258353	asparaginase(ASPG)
100513089	ankyrin repeat and sterile alpha motif domain containing 1B(ANKS1B)
100154431	ankyrin repeat and SOCS box containing 11(ASB11)
100517505	cortactin binding protein 2(CTTNBP2)
100517504	ankyrin repeat and EF-hand domain containing 1(ANKEF1)
110260413	IQ motif and ankyrin repeat containing 1(IQANK1)
100523704	ankyrin repeat domain 33B(ANKRD33B)
100522528	sterile alpha motif domain containing 5(SAMD5)
100523325	ankyrin repeat and SOCS box containing 4(ASB4)
100627989	ankyrin repeat domain 31(ANKRD31)
110255937	protein phosphatase 1 regulatory subunit 27(PPP1R27)
Gene Group 20	Enrichment Score: 2.959687456651178
Ensembl ID	Gene Name
100153371	carbonic anhydrase 14(CA14)
100511956	carbonic anhydrase 4(CA4)
100154873	carbonic anhydrase 2(CA2)
445526	carbonic anhydrase 11(CA11)
100519048	carbonic anhydrase 10(CA10)
110260889	carbonic anhydrase 5A(CA5A)
Gene Group 21	Enrichment Score: 2.8351326365155187
Ensembl ID	Gene Name
100623412	cadherin 16(CDH16)
100626354	cadherin 4(CDH4)
100511695	calsyntenin 3(CLSTN3)
100626137	desmoglein 4(DSG4)
100156315	cadherin 24(CDH24)
100520035	protocadherin 7(PCDH7)
100514561	cadherin related family member 5(CDHR5)
100623166	dachsous cadherin-related 1(DCHS1)
100153917	SLIT and NTRK like family member 6(SLITRK6)
100187727	cadherin 3(CDH3)
414737	cadherin 5(CDH5)
Gene Group 22	Enrichment Score: 2.737812003279786
Ensembl ID	Gene Name
100518417	adhesion G protein-coupled receptor E2-like(LOC100518417)
100155660	CD93 molecule(CD93)
110260204	adhesion G protein-coupled receptor B1(ADGRB1)
100739328	G protein-coupled receptor class C group 5 member D(GPRC5D)
100170146	parathyroid hormone 2 receptor(PTH2R)
100155402	vasoactive intestinal peptide receptor 1(VIPR1)
100153378	G protein-coupled receptor 18(GPR18)
100621610	adhesion G protein-coupled receptor G5(ADGRG5)
102160124	adhesion G protein-coupled receptor G7(ADGRG7)
397243	cysteinyl leukotriene receptor 2(CYSLTR2)
397426	corticotropin releasing hormone receptor 1(CRHR1)
100415777	thyrotropin releasing hormone receptor(TRHR)
100525348	adhesion G protein-coupled receptor L4(ADGRL4)
102159820	cadherin EGF LAG seven-pass G-type receptor 1(LOC102159820)
100154059	glucagon like peptide 1 receptor(GLP1R)
100521045	secretin receptor(SCTR)
100626842	taste 1 receptor member 1(TAS1R1)
Gene Group 23	Enrichment Score: 2.697987857585366
Ensembl ID	Gene Name
100153200	semaphorin 3B(SEMA3B)
100625689	fibronectin type III domain containing 4(FNDC4)
100512275	ssemaphorin 4F(SEMA4F)
100157147	semaphorin 4A(SEMA4A)
100511850	semaphorin 6D(SEMA6D)
100622587	fibronectin type III domain containing 5(FNDC5)
100153225	semaphorin 3F(SEMA3F)
100737194	semaphorin 5A(SEMA5A)
100271881	lymphocyte antigen 6 family member G6F(LY6G6F)
Gene Group 24	Enrichment Score: 2.6967131377953626
Ensembl ID	Gene Name
100516679	bestrophin 4(BEST4)
100154589	chloride intracellular channel 5(CLIC5)
100524682	tweety family member 1(TTYH1)
100294681	claudin 17(CLDN17)
Gene Group 25	Enrichment Score: 2.6695981420269876
Ensembl ID	Gene Name
100153801	neuronal guanine nucleotide exchange factor(NGEF)
100623422	ArfGAP with coiled-coil, ankyrin repeat and PH domains 1(ACAP1)
100233179	docking protein 1(DOK1)
100525936	dual adaptor of phosphotyrosine and 3-phosphoinositides 1(DAPP1)
100156934	pleckstrin homology and coiled-coil domain containing D1(PLEKHD1)
100737524	pleckstrin and Sec7 domain containing 2(PSD2)
100622228	Rac/Cdc42 guanine nucleotide exchange factor 6(ARHGEF6)
100523904	pleckstrin homology like domain family A member 1(PHLDA1)
100737847	pleckstrin homology domain containing A2(PLEKHA2)
100518732	Rho GTPase activating protein 9(ARHGAP9)
100513463	actin filament associated protein 1 like 1(AFAP1L1)
100514401	Rho GTPase activating protein 25(ARHGAP25)
100739199	pleckstrin homology and RhoGEF domain containing G2(PLEKHG2)
100154659	spectrin beta, erythrocytic(SPTB)
100152025	docking protein 2(DOK2)
100623057	pleckstrin homology like domain family B member 2(PHLDB2)
100516320	TRIO and F-actin binding protein(TRIOBP)
100524497	pleckstrin homology and RhoGEF domain containing G4(PLEKHG4)
Gene Group 26	Enrichment Score: 2.611780117141208
Ensembl ID	Gene Name
110261033	kallikrein related peptidase 14(KLK14)
100516829	serine protease 50(PRSS50)
110261030	kallikrein related peptidase 11(KLK11)
100621820	chymotrypsinogen 2-like(LOC100621820)
100525933	transmembrane protease serine 11A(LOC100525933)
100511374	serine protease 36(PRSS36)
100511557	serine protease 53(PRSS53)
100513671	transmembrane protease serine 11B-like protein(LOC100513671)
100512727	transmembrane protease serine 11C(LOC100512727)
100233185	granzyme K(GZMK)
110259249	pregnancy-associated glycoprotein 2-like(LOC110259249)
431673	kallikrein 1(KLK1)
100620705	kallikrein related peptidase 15(KLK15)
100737499	serine protease 56(PRSS56)
100737240	serine protease 33(PRSS33)
Gene Group 27	Enrichment Score: 2.4697659723646717
Ensembl ID	Gene Name
100524379	peptidyl arginine deiminase 3(PADI3)
100524749	peptidyl arginine deiminase 4(PADI4)
100621356	peptidyl arginine deiminase 2(PADI2)
100524567	peptidyl arginine deiminase 1(PADI1)
Gene Group 28	Enrichment Score: 2.3328604603622534
Ensembl ID	Gene Name
100521849	protein phosphatase 1 regulatory subunit 13B(PPP1R13B)
100153151	sorbin and SH3 domain containing 1(SORBS1)
100520910	Rho GTPase activating protein 33(ARHGAP33)
100510985	dedicator of cytokinesis 5(DOCK5)
Gene Group 29	Enrichment Score: 2.2923001491287285
Ensembl ID	Gene Name
100521662	phosphodiesterase 1B(PDE1B)
100737701	phosphodiesterase 2A(PDE2A)
100037969	phosphodiesterase 7B(PDE7B)
100625223	phosphodiesterase 6B(PDE6B)
396555	phosphodiesterase 3A(PDE3A)
100037941	phosphodiesterase 4B(PDE4B)
396825	phosphodiesterase 4A(PDE4A)
Gene Group 30	Enrichment Score: 2.2415914337127925
Ensembl ID	Gene Name
100153039	neutral sphingomyelinase activation associated factor(NSMAF)
100049676	lysosomal trafficking regulator(LYST)
102162936	sperm associated antigen 16(SPAG16)
100156044	TLE family member 4, transcriptional corepressor(TLE4)
100523327	WD repeat domain 26(WDR26)
100523116	Dmx like 1(DMXL1)
100158174	mitogen-activated protein kinase binding protein 1(MAPKBP1)
100153251	WD repeat domain 72(WDR72)
100620954	cell division cycle 20B(CDC20B)
100516074	EMAP like 6(EML6)
100511910	coronin 2A(CORO2A)
100525066	denticleless E3 ubiquitin protein ligase homolog(DTL)
100622057	kinesin family member 21B(KIF21B)
Gene Group 31	Enrichment Score: 2.174958016803418
Ensembl ID	Gene Name
100518625	SLIT-ROBO Rho GTPase activating protein 2(SRGAP2)
100520910	Rho GTPase activating protein 33(ARHGAP33)
100518732	Rho GTPase activating protein 9(ARHGAP9)
100152628	proline-serine-threonine phosphatase interacting protein 1(PSTPIP1)
100158062	RUN and SH3 domain containing 2(RUSC2)
100518178	FCH and mu domain containing endocytic adaptor 1(FCHO1)
100511554	FCH and double SH3 domains 1(FCHSD1)
Gene Group 32	Enrichment Score: 2.1713699132489537
Ensembl ID	Gene Name
100520620	receptor tyrosine kinase like orphan receptor 1(ROR1)
100522873	EPH receptor A2(EPHA2)
100519652	MER proto-oncogene, tyrosine kinase(MERTK)
396810	KIT proto-oncogene, receptor tyrosine kinase(KIT)
100525789	erb-b2 receptor tyrosine kinase 4(ERBB4)
397311	kinase insert domain receptor(KDR)
100153873	protein tyrosine kinase 7 (inactive)(PTK7)
100519549	EPH receptor B2(EPHB2)
100153248	fibroblast growth factor receptor 1(FGFR1)
Gene Group 33	Enrichment Score: 2.16163763291884
Ensembl ID	Gene Name
574075	fatty acid binding protein 7(FABP7)
407611	retinol binding protein 2(RBP2)
574074	fatty acid binding protein 5(FABP5)
100156666	retinol binding protein 1(RBP1)
397423	fatty acid binding protein 6(FABP6)
100151890, 100151890	peripheral myelin protein 2(PMP2)
399533	fatty acid binding protein 4, adipocyte(FABP4)
399532	fatty acid binding protein 3(FABP3)
Gene Group 34	Enrichment Score: 2.124876880111083
Ensembl ID	Gene Name
100515194	actin binding LIM protein family member 3(ABLIM3)
100512825	LIM domain only 2(LMO2)
100737811	PDZ and LIM domain 2(PDLIM2)
100154343	actin binding LIM protein 1(ABLIM1)
733691	nebulin related anchoring protein(NRAP)
100519075	microtubule associated monooxygenase, calponin and LIM domain containing 2(MICAL2)
100513532	four and a half LIM domains 2(FHL2)
100739090	LIM homeobox 6(LHX6)
396986	four and a half LIM domains 3(FHL3)
100152632	zinc finger protein 185 with LIM domain(ZNF185)
Gene Group 35	Enrichment Score: 2.052865202380285
Ensembl ID	Gene Name
397417	metallothionein 1A(MT1A)
110260925	metallothionein 4(MT4)
100037920	metallothionein-1E(MT1D)
100739663	metallothionein-1C(LOC100739663)
102166944	metallothionein-1E-like(LOC102166944)
Gene Group 36	Enrichment Score: 2.0345052519091444
Ensembl ID	Gene Name
100622883	neuron navigator 3(NAV3)
100515512	IQ motif containing with AAA domain 1(IQCA1)
100521067	neuron navigator 2(NAV2)
100525121	neuron navigator 1(NAV1)
Gene Group 37	Enrichment Score: 2.0002990623600283
Ensembl ID	Gene Name
100524895	DnaJ heat shock protein family (Hsp40) member C7(DNAJC7)
100524828	peroxisomal biogenesis factor 5 like(PEX5L)
110258076	G protein signaling modulator 1(GPSM1)
100625559	tetratricopeptide repeat domain 6(TTC6)
100154890	tetratricopeptide repeat domain 7B(TTC7B)
100523621	kinesin light chain 1(KLC1)
Gene Group 38	Enrichment Score: 1.9362662061590166
Ensembl ID	Gene Name
100525524	synaptic Ras GTPase activating protein 1(SYNGAP1)
100620812	ArfGAP with GTPase domain, ankyrin repeat and PH domain 1(AGAP1)
100152025	docking protein 2(DOK2)
100511744	ArfGAP with RhoGAP domain, ankyrin repeat and PH domain 3(ARAP3)
100152734	Rho GTPase activating protein 29(ARHGAP29)
100518732	Rho GTPase activating protein 9(ARHGAP9)
100514933	chimerin 2(CHN2)
100513276	Rho GTPase activating protein 39(ARHGAP39)
100623422	ArfGAP with coiled-coil, ankyrin repeat and PH domains 1(ACAP1)
100520910	Rho GTPase activating protein 33(ARHGAP33)
100514401	Rho GTPase activating protein 25(ARHGAP25)
100624152	RAS p21 protein activator 4B(RASA4B)
100518625	SLIT-ROBO Rho GTPase activating protein 2(SRGAP2)
Gene Group 39	Enrichment Score: 1.9300547603114544
Ensembl ID	Gene Name
100738545	polypeptide N-acetylgalactosaminyltransferase 1(GALNT1)
106505617	leucine rich repeats and transmembrane domains 1(LRTM1)
100737774	leucine rich repeat containing 17(LRRC17)
100738541	solute carrier family 4 member 9(SLC4A9)
100154854	seizure related 6 homolog like(SEZ6L)
100522244	sodium channel epithelial 1 subunit gamma(SCNN1G)
100516106	mannose receptor C type 2(MRC2)
100620416	ATP binding cassette subfamily G member 1(ABCG1)
100628086	methyltransferase like 9(METTL9)
100135672	ephrin B3(EFNB3)
100511499	uroplakin 3B like 2(UPK3BL2)
100101921	solute carrier family 9 member A2(SLC9A2)
102158247	vasorin(VASN)
100152541	solute carrier family 66 member 2(SLC66A2)
100513795	germ cell associated 1(GSG1)
100157140	zinc finger DHHC-type palmitoyltransferase 8(ZDHHC8)
100514561	cadherin related family member 5(CDHR5)
100515319	G protein-coupled receptor 153(GPR153)
100152527	family with sequence similarity 162 member B(FAM162B)
397269	activated leukocyte cell adhesion molecule(ALCAM)
100624226	tumor necrosis factor receptor superfamily member 10A-like(LOC100624226)
106508649	glucosaminyl (N-acetyl) transferase 1(GCNT1)
100522214	transmembrane 4 L six family member 18(TM4SF18)
100526049	hyperpolarization activated cyclic nucleotide gated potassium channel 3(HCN3)
100621152	ring finger protein 222(RNF222)
100511470	von Willebrand factor A domain containing 8(VWA8)
100621918	shisa family member 3(SHISA3)
100625751	ST3 beta-galactoside alpha-2,3-sialyltransferase 5(ST3GAL5)
100626514	carbohydrate sulfotransferase 2(CHST2)
100154032	leucine rich repeat, Ig-like and transmembrane domains 1(LRIT1)
100526026	tetraspanin 7(TSPAN7)
100515287	tetraspanin 33(TSPAN33)
595126	lymphocyte antigen 75(LY75)
100157861	solute carrier family 14 member 1 (Kidd blood group)(SLC14A1)
100153249	leucine rich repeat and fibronectin type III domain containing 2(LRFN2)
100624186	G protein-coupled receptor class C group 5 member A(GPRC5A)
100523705	transmembrane protein 140(TMEM140)
106509370	leucine rich repeat containing 4C(LRRC4C)
100623412	cadherin 16(CDH16)
100127163	TNF superfamily member 12(TNFSF12)
100521401	transmembrane and immunoglobulin domain containing 1(TMIGD1)
100526002	solute carrier family 35 member F2(SLC35F2)
100522166	transmembrane protein 37(TMEM37)
445537	ST3 beta-galactoside alpha-2,3-sialyltransferase 1(ST3GAL1)
100620339	colony stimulating factor 2 receptor subunit alpha(CSF2RA)
100628008	acid sensing ion channel subunit 2(ASIC2)
100049687	ADAM3b(LOC100049687)
414851	MGAT4 family member C(MGAT4C)
100157065	N-acylsphingosine amidohydrolase 2(ASAH2)
100525991	limb development membrane protein 1 like(LMBR1L)
100521388	cytotoxic and regulatory T cell molecule(CRTAM)
102158165	transmembrane protein 63C(TMEM63C)
100520620	receptor tyrosine kinase like orphan receptor 1(ROR1)
100738444	transmembrane protein 178A(TMEM178A)
100152456	potassium two pore domain channel subfamily K member 9(KCNK9)
100517547	beta-carotene oxygenase 2(BCO2)
110259214	interferon induced transmembrane protein 10(IFITM10)
100627993	immunoglobulin superfamily member 6(IGSF6)
100302017	claudin 14(CLDN14)
100512173	ST6 N-acetylgalactosaminide alpha-2,6-sialyltransferase 3(ST6GALNAC3)
100625689	fibronectin type III domain containing 4(FNDC4)
100049669	glycoprotein nmb(GPNMB)
100516002	leucine rich repeats and calponin homology domain containing 4(LRCH4)
100511400	leucine rich repeat containing G protein-coupled receptor 6(LGR6)
100624916	V-set and immunoglobulin domain containing 10 like(VSIG10L)
100520600	tumor protein p53 inducible protein 11(TP53I11)
100153200	semaphorin 3B(SEMA3B)
100156267	clarin 3(CLRN3)
397178	interleukin 12 receptor subunit beta 2(IL12RB2)
100156266	cyclic nucleotide gated channel subunit alpha 2(CNGA2)
100624901	myopalladin(MYPN)
100621832	post-GPI attachment to proteins GalNAc transferase 4(PGAP4)
100627197	potassium two pore domain channel subfamily K member 2(KCNK2)
100525186	phytanoyl-CoA 2-hydroxylase interacting protein like(PHYHIPL)
100627962	chromosome 4 C1orf162 homolog(C4H1orf162)
397167	potassium voltage-gated channel subfamily E regulatory subunit 4(KCNE4)
100512141	dedicator of cytokinesis 10(DOCK10)
397165	CD69 molecule(CD69)
106507011	serine rich and transmembrane domain containing 2(SERTM2)
100622587	fibronectin type III domain containing 5(FNDC5)
100525178	leucine rich repeat neuronal 2(LRRN2)
100523640	glycoprotein V platelet(GP5)
100627950	ADAM metallopeptidase with thrombospondin type 1 motif 13(ADAMTS13)
100157012	ganglioside induced differentiation associated protein 1(GDAP1)
100523638	transient receptor potential cation channel subfamily V member 2(TRPV2)
431671	solute carrier family 6 member 14(SLC6A14)
100157775	transient receptor potential cation channel subfamily M member 6(TRPM6)
100625643	neuregulin 2(NRG2)
100522865	shisa like 1(SHISAL1)
100627175	GRAM domain containing 2-like(LOC100627175)
100152398	CD53 molecule(CD53)
100519788	TMEM9 domain family member B(TMEM9B)
100152393	carbohydrate sulfotransferase 15(CHST15)
110259918	ITPRIP like 2(ITPRIPL2)
100516714	transmembrane protein 35A(TMEM35A)
110261449	kinocilin(KNCN)
100522082	solute carrier family 5 member 9(SLC5A9)
100153917	SLIT and NTRK like family member 6(SLITRK6)
100512096	monocyte to macrophage differentiation associated 2(MMD2)
100156975	protein phosphatase 1 regulatory inhibitor subunit 2(PPP1R2)
100627912	glycerophosphodiester phosphodiesterase domain containing 5(GDPD5)
100520532	melan-A(MLANA)
100624843	solute carrier family 29 member 4(SLC29A4)
100522832	G protein-coupled receptor 156(GPR156)
100515926	nucleoporin 210(NUP210)
414756	PDZK1 interacting protein 1(PDZK1IP1)
100621771	arylsulfatase F-like(LOC100621771)
100627907	dystrobrevin alpha(DTNA)
100170768	1-acylglycerol-3-phosphate O-acyltransferase 2(AGPAT2)
100627131	solute carrier family 9 member C1(SLC9C1)
100126278	aquaporin 5(AQP5)
100516679	bestrophin 4(BEST4)
100511308	transmembrane protein 132A(TMEM132A)
100037298	solute carrier family 7 member 2(SLC7A2)
100512069	otopetrin 2(OTOP2)
100623280	patched 2(PTCH2)
100154641	ABI family member 3 binding protein(ABI3BP)
100153873	protein tyrosine kinase 7 (inactive)(PTK7)
100037288	MHC class I antigen 3(SLA-3)
110259862	transmembrane protein 238-like(LOC110259862)
100519727	FERM domain containing 3(FRMD3)
110260624	TNF receptor superfamily member 13C(TNFRSF13C)
397075	uroplakin 2(UPK2)
100514349	family with sequence similarity 234 member B(FAM234B)
100515882	transmembrane protein 232(TMEM232)
100512044	solute carrier family 5 member 7(SLC5A7)
100515872	ring finger protein 128(RNF128)
110260607	GRAM domain containing 4(GRAMD4)
100626319	transmembrane protein 51(TMEM51)
100156146	ADAM metallopeptidase domain 8(ADAM8)
100512800	sodium voltage-gated channel beta subunit 4(SCN4B)
100518932	seizure related 6 homolog(SEZ6)
100156908	platelet endothelial aggregation receptor 1(PEAR1)
100622474	MPV17 mitochondrial inner membrane protein like(MPV17L)
100626308	APC down-regulated 1(APCDD1)
503660	solute carrier family 30 member 1(SLC30A1)
100155368	junctophilin 1(JPH1)
100627072	protein tyrosine phosphatase receptor type D(PTPRD)
100525060	N-deacetylase and N-sulfotransferase 3(NDST3)
100737517	solute carrier family 40 member 1(SLC40A1)
100525825	klotho beta(KLB)
100518152	nectin cell adhesion molecule 3(NECTIN3)
100512015	leucine rich repeat LGI family member 3(LGI3)
100513544	zinc finger DHHC-type palmitoyltransferase 18(ZDHHC18)
100739042	solute carrier family 16 member 6(SLC16A6)
404704	CD4 molecule(CD4)
100157650	solute carrier family 35 member F3(SLC35F3)
100126201	trafficking regulator of GLUT4 (SLC2A4) 1(TRARG1)
100511231	G protein-coupled receptor 155(GPR155)
100620912	STEAP3 metalloreductase(STEAP3)
100156875	transmembrane protein 181(TMEM181)
100525800	SLIT and NTRK like family member 4(SLITRK4)
100518128	sphingomyelin phosphodiesterase 3(SMPD3)
100513526	membrane associated ring-CH-type finger 3(MARCHF3)
100524259	amyloid beta precursor like protein 1(APLP1)
100624736	G protein-coupled receptor 143(GPR143)
100521956	cysteine rich transmembrane module containing 1(CYSTM1)
100515051	transient receptor potential cation channel subfamily V member 3(TRPV3)
102166402	Xg glycoprotein (Xg blood group)(XG)
407745	tyrosinase(TYR)
100519652	MER proto-oncogene, tyrosine kinase(MERTK)
100144589	solute carrier family 3 member 2(SLC3A2)
100154559	calcium homeostasis modulator family member 4(CALHM4)
100144586	ATP binding cassette subfamily B member 4(ABCB4)
100037973	solute carrier family 7 member 9(SLC7A9)
100512740	zinc finger DHHC-type palmitoyltransferase 19(ZDHHC19)
100622421	phospholipase D family member 5(PLD5)
100512737	solute carrier family 13 member 2(SLC13A2)
100156074	SLAM family member 9(LOC100156074)
100525767	core 1 synthase, glycoprotein-N-acetylgalactosamine 3-beta-galactosyltransferase 1(C1GALT1)
100623172	glycosyltransferase 1 domain containing 1(GLT1D1)
100625473	fatty acyl-CoA reductase 1(FAR1)
110255921	secreted and transmembrane 1(SECTM1)
100738984	solute carrier family 20 member 2(SLC20A2)
100271881	lymphocyte antigen 6 family member G6F(LY6G6F)
396976	ribonuclease A family member 4(RNASE4)
100621633	sideroflexin 5(SFXN5)
100512716	solute carrier family 6 member 12(SLC6A12)
100171400	transient receptor potential cation channel subfamily V member 6(TRPV6)
100156054	solute carrier organic anion transporter family member 3A1(SLCO3A1)
100521146	TNF receptor superfamily member 19(TNFRSF19)
100517310	roundabout guidance receptor 1(ROBO1)
100153752	claudin 10(CLDN10)
100144537	palmitoyl-protein thioesterase 2(PPT2)
100524201	galactoside 2-alpha-L-fucosyltransferase 2(FUT2A)
100621610	adhesion G protein-coupled receptor G5(ADGRG5)
100518064	ATP binding cassette subfamily A member 3(ABCA3)
100156039	solute carrier family 38 member 3(SLC38A3)
100511925	osteomodulin(OMD)
100152967	SEL1L2 adaptor subunit of ERAD E3 ligase(SEL1L2)
100152966	LHFPL tetraspan subfamily member 1(LHFPL1)
100155265	galactose-3-O-sulfotransferase 1(GAL3ST1)
100517285	leukocyte immunoglobulin-like receptor subfamily A member 6(LOC100517285)
100622364	ST8 alpha-N-acetyl-neuraminide alpha-2,8-sialyltransferase 5(ST8SIA5)
100144523	prostate transmembrane protein, androgen induced 1(PMEPA1)
100144520	proline rich transmembrane protein 1(PRRT1)
100516512	family with sequence similarity 107 member A(FAM107A)
100518044	ADAM metallopeptidase domain 23(ADAM23)
733644	Rh family C glycoprotein(RHCG)
100516505	V-set and transmembrane domain containing 5(VSTM5)
100144510	solute carrier organic anion transporter family member 2A1(SLCO2A1)
100517268	synaptic vesicle glycoprotein 2C(SV2C)
100302507	acid phosphatase 3(ACP3)
100126864	interferon gamma receptor 2(IFNGR2)
100519567	solute carrier family 49 member 4(SLC49A4)
100517266	transmembrane protein 221(TMEM221)
100511130	CD48 molecule(CD48)
100737395	divergent protein kinase domain 1C(DIPK1C)
100517263	DIRAS family GTPase 1(DIRAS1)
397684	Fc fragment of IgG receptor IIIa(FCGR3A)
100154470	leucine rich repeat containing 49(LRRC49)
100521095	NIPA like domain containing 3(NIPAL3)
100514957	immunoglobulin like domain containing receptor 2(ILDR2)
100519556	neurotrimin(NTM)
100152930	adhesion G protein-coupled receptor F5(ADGRF5)
100626164	premelanosome protein(PMEL)
100627698	leucine rich repeat neuronal 1(LRRN1)
100144488	uroplakin 1B(UPK1B)
397670	Rh blood group CcEe antigens(RHCE)
100622319	shisa like 2B(SHISAL2B)
100626921	neurofascin(NFASC)
100519540	RELT like 2(RELL2)
100144477	CD163 molecule-like 1(CD163L1)
110256602	tetraspanin 15(TSPAN15)
574065	tyrosinase related protein 1(TYRP1)
733600	unc-5 netrin receptor B(UNC5B)
100622306	V-set and transmembrane domain containing 1(VSTM1)
100516458	TNF superfamily member 18(TNFSF18)
100154431	ankyrin repeat and SOCS box containing 11(ASB11)
574053	TNF superfamily member 4(TNFSF4)
100515686	transmembrane protein 92(TMEM92)
110255818	stress associated endoplasmic reticulum protein family member 2(SERP2)
397640	regulator of G protein signaling 5(RGS5)
100524887	proton activated chloride channel 1(PACC1)
100627664	leucine rich repeat containing 15(LRRC15)
110257348	NKD inhibitor of WNT signaling pathway 2(NKD2)
102164731	endogenous retrovirus group V member 1 Env polyprotein-like(LOC102164731)
102160124	adhesion G protein-coupled receptor G7(ADGRG7)
100625356	hephaestin like 1(HEPHL1)
100157483	syntabulin(SYBU)
397621	solute carrier family 17 member 1(SLC17A1)
100524868	LDL receptor related protein 3(LRP3)
110256563	transmembrane protein with metallophosphoesterase domain(TMPPE)
100738087	neuronal vesicle trafficking associated 2(NSG2)
100623034	lemur tyrosine kinase 3(LMTK3)
110261152	mannosidase endo-alpha like(MANEAL)
100626098	minichromosome maintenance 10 replication initiation factor(MCM10)
613131	Fc fragment of IgG, low affinity IIb, receptor (CD32)(FCGR2B)
100462720	autophagy related 9B(ATG9B)
100158221	solute carrier family 22 member 14(SLC22A14)
100737305	astrotactin 1(ASTN1)
100152851	CD84 molecule(CD84)
100625314	eva-1 homolog B(EVA1B)
100153609	protein tyrosine phosphatase receptor type K(PTPRK)
100515629	polypeptide N-acetylgalactosaminyltransferase 3(GALNT3)
100622240	tetraspanin 5(TSPAN5)
100626842	taste 1 receptor member 1(TAS1R1)
100153595	protein tyrosine phosphatase receptor type G(PTPRG)
100511781	immunoglobulin superfamily member 11(IGSF11)
100517916	FAM3 metabolism regulating signaling molecule B(FAM3B)
100626830	ATCAY kinesin light chain interacting caytaxin(ATCAY)
100154357	cyclin and CBS domain divalent metal cation transport mediator 1(CNNM1)
100622989	cell adhesion associated, oncogene regulated(CDON)
100514841	tetraspanin 11(TSPAN11)
100152816	synaptotagmin 6(SYT6)
100520976	solute carrier family 13 member 5(SLC13A5)
100524810	immunoglobulin superfamily member 23(IGSF23)
100520970	neuronal cell adhesion molecule(NRCAM)
100621442	solute carrier family 2 member 9(SLC2A9)
106508932	trafficking protein particle complex subunit 3L(TRAPPC3L)
100524031	cysteine rich hydrophobic domain 2(CHIC2)
100511757	UDP-GlcNAc:betaGal beta-1,3-N-acetylglucosaminyltransferase 8(B3GNT8)
100524795	SEC14 like lipid binding 5(SEC14L5)
100625270	ST8 alpha-N-acetyl-neuraminide alpha-2,8-sialyltransferase 1(ST8SIA1)
110261089	G protein-coupled receptor 157(GPR157)
100625267	synaptotagmin 12(SYT12)
110261085	adherens junctions associated protein 1(AJAP1)
100525542	disintegrin and metalloproteinase domain-containing protein 32(LOC100525542)
100515566	kirre like nephrin family adhesion molecule 3(KIRREL3)
100622946	NPHS1 adhesion molecule, nephrin(NPHS1)
100524003	taste 2 receptor member 41(TAS2R41)
100515564	neural cell adhesion molecule 1(NCAM1)
396753	solute carrier family 9 member A5(SLC9A5)
100739527	transmembrane channel like 2(TMC2)
100624475	transmembrane O-mannosyltransferase targeting cadherins 1(TMTC1)
100520161	leucine rich repeat neuronal 3(LRRN3)
100739522	inositol 1,4,5-triphosphate receptor associated 1(IRAG1)
100514790	solute carrier family 16 member 5(SLC16A5)
110255686	patched domain-containing protein 3-like(LOC110255686)
100158130	transient receptor potential cation channel subfamily M member 1(TRPM1)
100521688	MARVEL domain containing 1(MARVELD1)
100158128	lectin, mannose binding 1 like(LMAN1L)
100522452	leucine rich repeat containing 32(LRRC32)
100152755	tripartite motif containing 59(TRIM59)
110255675	myogenesis regulating glycosidase (putative)(MYORG)
110261043	igLON family member 5-like(LOC110261043)
100158118	calcyon neuron specific vesicular protein(CALY)
100510937	hyperpolarization activated cyclic nucleotide gated potassium channel 1(HCN1)
102163819	membrane spanning 4-domains A10(MS4A10)
100516302	cystatin-9(LOC100516302)
100157346	ATPase 13A4(ATP13A4)
100514767	adhesion molecule with Ig like domain 1(AMIGO1)
100514765	V-set and immunoglobulin domain containing 8(VSIG8)
100516298	macrophage receptor with collagenous structure(MARCO)
100738728	reprimo like(RPRML)
100513229	fatty acid desaturase 6(FADS6)
396719	sorbin and SH3 domain containing 2(SORBS2)
100518596	solute carrier family 29 member 2(SLC29A2)
100513994	lecithin retinol acyltransferase(LRAT)
100739492	ST3 beta-galactoside alpha-2,3-sialyltransferase 6(ST3GAL6)
100513992	polypeptide N-acetylgalactosaminyltransferase 16(GALNT16)
100153501	lipocalin 2(LCN2)
100157335	leucine rich glioma inactivated 1(LGI1)
397480	hydroxysteroid 11-beta dehydrogenase 1(HSD11B1)
100513220	G protein-coupled receptor 83(GPR83)
102162270	solute carrier family 7 member 5(SLC7A5)
102164569	neuregulin 1(NRG1)
100155794	leucine rich repeats and calponin homology domain containing 2(LRCH2)
100526254	ring finger protein 180(RNF180)
100513981	synaptotagmin 17(SYT17)
100510913	nexilin F-actin binding protein(NEXN)
100511672	solute carrier family 24 member 5(SLC24A5)
100526242	prolyl 3-hydroxylase family member 4 (inactive)(P3H4)
110261005	NTPase KAP family P-loop domain containing 1(NKPD1)
100191062	hyaluronan synthase 1(HAS1)
102160717	immunoglobulin superfamily member 9(IGSF9)
100152711	ADAM metallopeptidase domain 28(ADAM28)
100526236	endonuclease domain containing 1(ENDOD1)
100522400	transmembrane 4 L six family member 4(TM4SF4)
100524699	thiamin pyrophosphokinase 1(TPK1)
641356	ST8 alpha-N-acetyl-neuraminide alpha-2,8-sialyltransferase 4(ST8SIA4)
102167611	immunoglobulin like and fibronectin type III domain containing 1(IGFN1)
445003	mannose receptor C-type 1(MRC1)
110260994	carcinoembryonic antigen-related cell adhesion molecule 21-like(LOC110260994)
100520861	ATP binding cassette subfamily A member 6(ABCA6)
100622872	neuropilin and tolloid like 1(NETO1)
100526228	potassium voltage-gated channel subfamily Q member 4(KCNQ4)
100620567	solute carrier family 7 member 13(SLC7A13)
444997	fatty acid desaturase 2(FADS2)
641348	solute carrier family 1 member 5(SLC1A5)
444995	fatty acid desaturase 1(FADS1)
100516251	solute carrier family 6 member 7(SLC6A7)
641346	solute carrier family 6 member 19(SLC6A19)
100739447	sodium leak channel, non-selective(NALCN)
102159930	sortilin related VPS10 domain containing receptor 2(SORCS2)
100158059	collagen type XIV alpha 1 chain(COL14A1)
100625160	hyperpolarization activated cyclic nucleotide gated potassium and sodium channel 2(HCN2)
100526213	ectodysplasin A receptor(EDAR)
100511639	leukocyte immunoglobulin-like receptor subfamily B member 3-like(LOC100511639)
396662	CD2 molecule(CD2)
100626687	piezo type mechanosensitive ion channel component 2(PIEZO2)
102162220	golgin A7 family member B(GOLGA7B)
100523139	leucine rich repeat containing 3B(LRRC3B)
100524673	DnaJ heat shock protein family (Hsp40) member C18(DNAJC18)
396658	interferon alpha and beta receptor subunit 1(IFNAR1)
100158046	ST8 alpha-N-acetyl-neuraminide alpha-2,8-sialyltransferase 2(ST8SIA2)
100520836	polypeptide N-acetylgalactosaminyltransferase 6(GALNT6)
100517000	solute carrier family 16 member 13(SLC16A13)
100737895	potassium two pore domain channel subfamily K member 3(KCNK3)
100312975	monoacylglycerol O-acyltransferase 2(MOGAT2)
110260197	Ly6/neurotoxin 1(LYNX1)
100628208	C2 calcium dependent domain containing 2(C2CD2)
100522361	fibronectin leucine rich transmembrane protein 1(FLRT1)
100521592	leucine rich repeat containing 4(LRRC4)
100520824	diacylglycerol lipase alpha(DAGLA)
100622067	embigin(EMB)
396636	CD8b molecule(CD8B)
100523883	astrotactin 2(ASTN2)
396634	receptor-type tyrosine-protein phosphatase C-like(LOC396634)
397401	receptor activity modifying protein 1(RAMP1)
100520043	junctional adhesion molecule 3(JAM3)
100152648	transmembrane protein 266(TMEM266)
100157250	solute carrier organic anion transporter family member 5A1(SLCO5A1)
100520035	protocadherin 7(PCDH7)
100522336	solute carrier family 9 member B2(SLC9B2)
110260930	brain expressed associated with NEDD4 1(BEAN1)
100625109	solute carrier family 10 member 2(SLC10A2)
100625876	solute carrier family 2 member 5(SLC2A5)
100154170	isthmin 1(ISM1)
100522330	solute carrier family 7 member 8(SLC7A8)
100625875	bifunctional apoptosis regulator(BFAR)
397382	mucin 1, cell surface associated(MUC1)
397380	beta-1,4-galactosyltransferase 4(B4GALT4)
100737086	solute carrier family 38 member 11(SLC38A11)
100628171	eva-1 homolog C(EVA1C)
100514651	potassium two pore domain channel subfamily K member 6(KCNK6)
100157228	ADAM metallopeptidase domain 12(ADAM12)
100514647	leucine rich repeats and transmembrane domains 2(LRTM2)
102166764	collectin subfamily member 12(COLEC12)
100303721	hepatitis A virus cellular receptor 1(HAVCR1)
100516174	sushi domain containing 1(SUSD1)
100152616	glutamate metabotropic receptor 4(GRM4)
100520775	tetraspanin 18(TSPAN18)
100519240	major facilitator superfamily domain containing 12(MFSD12)
100521541	synaptotagmin 7(SYT7)
100519232	KIAA1549(KIAA1549)
100153371	carbonic anhydrase 14(CA14)
100519992	leucine rich single-pass membrane protein 1(LSMEM1)
396578	solute carrier family 23 member 1(SLC23A1)
654289	protein C receptor(PROCR)
397344	ADAM metallopeptidase domain 9(ADAM9)
100151829	patched domain containing 1(PTCHD1)
100523824	myomesin 2(MYOM2)
100514619	armadillo like helical domain containing 4(ARMH4)
100156430	solute carrier family 6 member 17(SLC6A17)
100622765	receptor transporter protein 3(RTP3)
100155660	CD93 molecule(CD93)
100622761	lysophosphatidylglycerol acyltransferase 1(LPGAT1)
100738576	LHFPL tetraspan subfamily member 3(LHFPL3)
102167492	proline rich membrane anchor 1(PRIMA1)
396563	calcitonin-related polypeptide beta(CALCB)
106504106	discoidin, CUB and LCCL domain containing 2(DCBLD2)
100157181	transmembrane protein 47(TMEM47)
397322	insulin like growth factor binding protein acid labile subunit(IGFALS)
100739328	G protein-coupled receptor class C group 5 member D(GPRC5D)
100628112	interleukin 1 receptor type 2(IL1R2)
100151799	acyl-CoA wax alcohol acyltransferase 2(AWAT2)
100512285	CEA cell adhesion molecule 1(CEACAM1)
Gene Group 40	Enrichment Score: 1.9157509949246176
Ensembl ID	Gene Name
100626514	carbohydrate sulfotransferase 2(CHST2)
106510480	carbohydrate sulfotransferase 4(CHST4)
100525060	N-deacetylase and N-sulfotransferase 3(NDST3)
100521649	carbohydrate sulfotransferase 7(CHST7)
100522551	carbohydrate sulfotransferase 6(LOC100522551)
100519885	carbohydrate sulfotransferase 1(CHST1)
100628223	heparan sulfate-glucosamine 3-sulfotransferase 1(HS3ST1)
100152393	carbohydrate sulfotransferase 15(CHST15)
Gene Group 41	Enrichment Score: 1.8668118842374761
Ensembl ID	Gene Name
100518733, 100518733	calcium voltage-gated channel subunit alpha1 C(CACNA1C)
100511715	sodium voltage-gated channel alpha subunit 4(SCN4A)
100739447	sodium leak channel, non-selective(NALCN)
100154640	calcium voltage-gated channel subunit alpha1 I(CACNA1I)
100514745	calcium voltage-gated channel subunit alpha1 F(CACNA1F)
100622149	calcium voltage-gated channel subunit alpha1 S(CACNA1S)
Gene Group 42	Enrichment Score: 1.8451571295526166
Ensembl ID	Gene Name
100525698	glycine C-acetyltransferase(GCAT)
100515071	kynurenine aminotransferase 1(KYAT1)
100521318	glutamic--pyruvic transaminase 2(GPT2)
100307125	aminolevulinate, delta-, synthase 1 pseudogene(ALAS1)
Gene Group 43	Enrichment Score: 1.800723835674006
Ensembl ID	Gene Name
100037288	MHC class I antigen 3(SLA-3)
100037921	SLA-DQ beta1 domain(SLA-DQB1)
100135040	MHC class II DR-alpha(SLA-DRA)
100135050	MHC class II, DM beta(SLA-DMB)
100153387	MHC class II histocompatibility antigen SLA-DQA(SLA-DQA1)
100153386	MHC class II histocompatibility antigen SLA-DRB1(SLA-DRB1)
Gene Group 44	Enrichment Score: 1.753999786719367
Ensembl ID	Gene Name
100157892	forkhead box E1(FOXE1)
100127352	forkhead box P2(FOXP2)
110261252	forkhead box O6(FOXO6)
100625164	forkhead box N1(FOXN1)
Gene Group 45	Enrichment Score: 1.7396748474884427
Ensembl ID	Gene Name
100627418	cyclin dependent kinase 18(CDK18)
100152316	p21 (RAC1) activated kinase 5(PAK5)
100518921	cyclin dependent kinase 6(CDK6)
100519396	serine/threonine kinase 36(STK36)
100516166	calcium/calmodulin dependent protein kinase II beta(CAMK2B)
100513315	cyclin dependent kinase 15(CDK15)
100512553	calcium/calmodulin dependent protein kinase IG(CAMK1G)
100513119	cyclin-dependent kinase 20-like(LOC100513119)
100623034	lemur tyrosine kinase 3(LMTK3)
100627208	BUB1 mitotic checkpoint serine/threonine kinase(BUB1)
503667	calcium/calmodulin dependent protein kinase kinase 1(CAMKK1)
100737116	serine/threonine kinase 32C(STK32C)
100515860	PX domain containing serine/threonine kinase like(PXK)
397258	NIMA related kinase 2(NEK2)
100157041	cyclin dependent kinase 20(CDK20)
100524404	NIM1 serine/threonine protein kinase(NIM1K)
397251	polo like kinase 2(PLK2)
397250	polo like kinase 3(PLK3)
100512235	mitogen-activated protein kinase kinase kinase 6(MAP3K6)
100624523	microtubule affinity regulating kinase 1(MARK1)
100517077	MAPK interacting serine/threonine kinase 2(MKNK2)
100512796	protein kinase cGMP-dependent 2(PRKG2)
100523719	polo like kinase 5 (inactive)(PLK5)
100514689	microtubule associated serine/threonine kinase family member 4(MAST4)
100627454	hormonally up-regulated Neu-associated kinase(HUNK)
100519528	calmodulin like 4(CALML4)
100518006	SH3 domain binding kinase 1(SBK1)
100233194	MAPK interacting serine/threonine kinase 1(MKNK1)
100624404	salt inducible kinase 2(SIK2)
100738118	calmodulin like 5(CALML5)
100519998	maternal embryonic leucine zipper kinase(MELK)
100516103	death associated protein kinase 1(DAPK1)
100626014	calcium/calmodulin dependent protein kinase II alpha(CAMK2A)
110257399	src-related kinase lacking C-terminal regulatory tyrosine and N-terminal myristylation sites(SRMS)
100624209	microtubule affinity regulating kinase 4(MARK4)
100157757	serum/glucocorticoid regulated kinase 2(SGK2)
110255208	AP2 associated kinase 1(AAK1)
100511150	calcium/calmodulin dependent protein kinase ID(CAMK1D)
100157649	TTK protein kinase(TTK)
100157930	VRK serine/threonine kinase 1(VRK1)
Gene Group 46	Enrichment Score: 1.7013723168727657
Ensembl ID	Gene Name
100622812	dual specificity phosphatase 2(DUSP2)
100623524	dual specificity phosphatase 14(DUSP14)
110259213	dual specificity phosphatase 8(DUSP8)
100155079	protein tyrosine phosphatase receptor type E(PTPRE)
100525721	dual specificity phosphatase 15(DUSP15)
100157144	dual specificity phosphatase 5(DUSP5)
100514374	dual specificity phosphatase 4(DUSP4)
100153595	protein tyrosine phosphatase receptor type G(PTPRG)
100524422	protein tyrosine phosphatase non-receptor type 5(PTPN5)
Gene Group 47	Enrichment Score: 1.6128499145166102
Ensembl ID	Gene Name
106510466	MAF bZIP transcription factor(MAF)
100524854	CXXC finger protein 5(CXXC5)
100156484	MAF bZIP transcription factor F(MAFF)
100622803	AT-rich interaction domain 3A(ARID3A)
100515875	basic leucine zipper ATF-like transcription factor 2(BATF2)
397173	SRY-box transcription factor 6(SOX6)
100519713	TOX high mobility group box family member 3(TOX3)
100521805	AT-rich interaction domain 3B(ARID3B)
100154630	Holliday junction recognition protein(HJURP)
Gene Group 48	Enrichment Score: 1.5759639853667902
Ensembl ID	Gene Name
100152565	GDNF family receptor alpha 1(GFRA1)
102166950	GDNF family receptor alpha 2(GFRA2)
397347	CD59 molecule(CD59)
110260197	Ly6/neurotoxin 1(LYNX1)
Gene Group 49	Enrichment Score: 1.5149239603221667
Ensembl ID	Gene Name
100628033	homeobox C11(HOXC11)
100623612	HESX homeobox 1(HESX1)
100739090	LIM homeobox 6(LHX6)
100302364	msh homeobox 1(MSX1)
397002	HNF1 homeobox B(HNF1B)
100523029	distal-less homeobox 2(DLX2)
100520485	orthodenticle homeobox 1(OTX1)
102160784	SATB homeobox 2(SATB2)
100514045	zinc finger homeobox 4(ZFHX4)
100515172	homeobox D8(HOXD8)
100516112	engrailed homeobox 1(EN1)
100521187	empty spiracles homeobox 1(EMX1)
100515875	basic leucine zipper ATF-like transcription factor 2(BATF2)
100517238	distal-less homeobox 4(DLX4)
100519066	homeobox A9(HOXA9)
100152323	goosecoid homeobox 2(GSC2)
100518969	homeobox C13(HOXC13)
100516335	distal-less homeobox 3(DLX3)
100623777	FOS like 2, AP-1 transcription factor subunit(FOSL2)
100156548	zinc fingers and homeoboxes 3(ZHX3)
110257220	msh homeobox 2(MSX2)
100153673	cut like homeobox 2(CUX2)
100513081	LIM homeobox transcription factor 1 alpha(LMX1A)
110255474	distal-less homeobox 6(DLX6)
100525814	SIX homeobox 2(SIX2)
397105	POU class 2 homeobox 2(POU2F2)
100524448	GS homeobox 2(GSX2)
100625732	TGFB induced factor homeobox 1(TGIF1)
Gene Group 50	Enrichment Score: 1.514718357079239
Ensembl ID	Gene Name
100156026	transcription factor 24(TCF24)
100622397	hes family bHLH transcription factor 6(HES6)
100625732	TGFB induced factor homeobox 1(TGIF1)
100155518	musculin(MSC)
100518432	MYCL proto-oncogene, bHLH transcription factor(MYCL)
397173	SRY-box transcription factor 6(SOX6)
100625349	MAX dimerization protein 1(MXD1)
100523367	atonal bHLH transcription factor 8(ATOH8)
100518190	MYCN proto-oncogene, bHLH transcription factor(MYCN)
100153433	mesoderm posterior bHLH transcription factor 2(MESP2)
Gene Group 51	Enrichment Score: 1.4469881132083706
Ensembl ID	Gene Name
100153848	EBF transcription factor 3(EBF3)
100521810	CXXC finger protein 4(CXXC4)
100739090	LIM homeobox 6(LHX6)
100518275	MDS1 and EVI1 complex locus(MECOM)
100514045	zinc finger homeobox 4(ZFHX4)
100524854	CXXC finger protein 5(CXXC5)
100511364	ovo like transcriptional repressor 1(OVOL1)
110256671	zinc finger protein 891(ZNF891)
100624021	PLAG1 like zinc finger 2(PLAGL2)
100520198	zinc finger protein 576(ZNF576)
494562	Kruppel like factor 9(KLF9)
100516296	early growth response 3(EGR3)
100516906	early growth response 4(EGR4)
100156555	double PHD fingers 3(DPF3)
100153356	zinc finger protein 239(ZNF239)
100519576	zinc finger protein 366(ZNF366)
100156548	zinc fingers and homeoboxes 3(ZHX3)
100151894	zinc finger matrin-type 1(ZMAT1)
100514968	zinc finger SWIM-type containing 5(ZSWIM5)
110260886	zinc finger protein, FOG family member 1(ZFPM1)
100144512	zinc finger protein 831(ZNF831)
100519901	zinc finger protein 428(ZNF428)
100736804	zinc finger protein 385A(ZNF385A)
100737978	IKAROS family zinc finger 2(IKZF2)
100521543	zinc finger RNA binding protein 2(ZFR2)
100518628	TBK1 binding protein 1(TBKBP1)
100127352	forkhead box P2(FOXP2)
110257542	zinc finger and SCAN domain-containing protein 2-like(LOC110257542)
106510560	zinc finger protein 114(ZNF114)
110259842	zinc finger protein 853(ZNF853)
100620752	zinc finger protein 385B(ZNF385B)
100519513	Sp6 transcription factor(SP6)
100520077	zinc finger protein 423(ZNF423)
100174955	Kruppel like factor 12(KLF12)
Gene Group 52	Enrichment Score: 1.3362439168768094
Ensembl ID	Gene Name
100431101	tripartite motif containing 63(TRIM63)
100738479	tripartite motif-containing protein 34(LOC100738479)
100152755	tripartite motif containing 59(TRIM59)
100737811	PDZ and LIM domain 2(PDLIM2)
100513526	membrane associated ring-CH-type finger 3(MARCHF3)
100156795	PDZ domain containing ring finger 4(PDZRN4)
106507011	serine rich and transmembrane domain containing 2(SERTM2)
100525132	PDZ domain containing 2(PDZD2)
100515872	ring finger protein 128(RNF128)
100621152	ring finger protein 222(RNF222)
100627962	chromosome 4 C1orf162 homolog(C4H1orf162)
100526254	ring finger protein 180(RNF180)
100141418	ring finger protein 39(RNF39)
100156738	leucine rich repeat and sterile alpha motif containing 1(LRSAM1)
110256563	transmembrane protein with metallophosphoesterase domain(TMPPE)
100522673	PHD finger protein 21B(PHF21B)
100517266	transmembrane protein 221(TMEM221)
100738776	ring finger protein 17(RNF17)
100626865	ring finger protein 25(RNF25)
100520974	tripartite motif containing 47(TRIM47)
100628086	methyltransferase like 9(METTL9)
100625875	bifunctional apoptosis regulator(BFAR)
100519890	tripartite motif containing 36(TRIM36)
100523319	ligand of numb-protein X 1(LNX1)
Gene Group 53	Enrichment Score: 1.3065522929309548
Ensembl ID	Gene Name
100626468	solute carrier family 2 member 3(SLC2A3)
397457	endothelin receptor type A(EDNRA)
100519976	angiotensin II receptor type 1(AGTR1)
100037298	solute carrier family 7 member 2(SLC7A2)
100155402	vasoactive intestinal peptide receptor 1(VIPR1)
397547	neuropeptide Y receptor Y1(NPY1R)
414911	endothelin receptor type B(EDNRB)
397498	cholinergic receptor muscarinic 2(CHRM2)
397243	cysteinyl leukotriene receptor 2(CYSLTR2)
100415777	thyrotropin releasing hormone receptor(TRHR)
396802	opioid receptor mu 1(OPRM1)
397029	proteolipid protein 1(PLP1)
396592	translocator protein(TSPO)
Gene Group 54	Enrichment Score: 1.3013017043575226
Ensembl ID	Gene Name
110256156	RNA binding fox-1 homolog 3(RBFOX3)
100515203	polypyrimidine tract binding protein 2(PTBP2)
100627974	musashi RNA binding protein 1(MSI1)
100157731	insulin like growth factor 2 mRNA binding protein 2(IGF2BP2)
100153958	poly(A) binding protein cytoplasmic 1(PABPC1)
100623447	ribonucleoprotein, PTB binding 2(RAVER2)
100522863	RNA binding fox-1 homolog 1(RBFOX1)
100515074	ELAV like RNA binding protein 3(ELAVL3)
Gene Group 55	Enrichment Score: 1.1417413418847249
Ensembl ID	Gene Name
100520913	erythrocyte membrane protein band 4.1 like 3(EPB41L3)
100514201	FERM domain containing 1(FRMD1)
100737056	FERM domain containing 4A(FRMD4A)
100519727	FERM domain containing 3(FRMD3)
Gene Group 56	Enrichment Score: 1.1213893416867835
Ensembl ID	Gene Name
100524038	kinesin family member 14(KIF14)
100516205	kinesin family member 2C(KIF2C)
100623146	kinesin family member 22(KIF22)
100622057	kinesin family member 21B(KIF21B)
100154627	kinesin family member C1(KIFC1)
110258336	kinesin family member 26A(KIF26A)
Gene Group 57	Enrichment Score: 1.0428674294252445
Ensembl ID	Gene Name
106504121	histone H3.1(LOC106504121)
100155734	histone H2A type 1(LOC100155734)
100513079	centromere protein A(CENPA)
100154511	histone cluster 1, H3e(HIST1H3E)
100157327	histone cluster 1, H2bd(HIST1H2BD)
100158117	histone H4(LOC100158117)
100738859	histone H2B type 2-E(LOC100738859)
Gene Group 58	Enrichment Score: 0.6835962543914477
Ensembl ID	Gene Name
397297	peroxisome proliferator activated receptor delta(PPARD)
100156637	RAR related orphan receptor A(RORA)
100153983	nuclear receptor subfamily 2 group F member 2(NR2F2)
100153960	nuclear receptor subfamily 1 group H member 4(NR1H4)
733636	hepatocyte nuclear factor 4 alpha(HNF4A)
100739111	RAR related orphan receptor B(RORB)
Gene Group 59	Enrichment Score: 0.6815994916474091
Ensembl ID	Gene Name
100524520	DExH-box helicase 58(DHX58)
100523329	DEAD-box helicase 25(DDX25)
100621580	DEAD-box helicase 59(DDX59)
100154153	chromodomain helicase DNA binding protein 1 like(CHD1L)
Gene Group 60	Enrichment Score: 0.46789520855501554
Ensembl ID	Gene Name
100523190	cytochrome P450 family 2 subfamily F member 1(CYP2F1)
397687	cytochrome P450 family 2 subfamily D member 6(CYP2D6)
397145	cytochrome P450 family 24 subfamily A member 1(CYP24A1)
403216	cytochrome P450 family 2 subfamily E member 1(CYP2E1)
Gene Group 61	Enrichment Score: 0.37230696359064985
Ensembl ID	Gene Name
100512115	RAB15, member RAS oncogene family(RAB15)
100514413	GTP binding protein 2(GTPBP2)
100522830	RAB6B, member RAS oncogene family(RAB6B)
100517263	DIRAS family GTPase 1(DIRAS1)
780430	DIRAS family GTPase 2(DIRAS2)
100625935	calcium release activated channel regulator 2A(CRACR2A)
733668	DIRAS family GTPase 3(DIRAS3)
100516934	RAS like family 10 member B(RASL10B)
100521670	RAS like family 11 member B(RASL11B)
100621398	muscle RAS oncogene homolog(MRAS)
100514255	ADP ribosylation factor like GTPase 4C(ARL4C)
Gene Group 62	Enrichment Score: 0.1767906876861797
Ensembl ID	Gene Name
100521568	kelch like family member 35(KLHL35)
100524761	potassium channel tetramerization domain containing 12(KCTD12)
100623982	kelch repeat and BTB domain containing 8(KBTBD8)
100623314	potassium voltage-gated channel subfamily A member 7(KCNA7)
100523354	potassium voltage-gated channel modifier subfamily G member 2(KCNG2)
100620758	potassium voltage-gated channel subfamily D member 1(KCND1)
100526228	potassium voltage-gated channel subfamily Q member 4(KCNQ4)
733666	potassium voltage-gated channel modifier subfamily S member 3(KCNS3)
100513048	kelch like family member 24(KLHL24)
100626185	potassium voltage-gated channel modifier subfamily S member 1(KCNS1)
102158168	potassium channel tetramerization domain containing 21(KCTD21)
100520221	kelch like family member 23(KLHL23)
100511872	germ cell-less 1, spermatogenesis associated(GMCL1)
100622059	potassium channel tetramerization domain containing 11(KCTD11)
100518489	gigaxonin(GAN)
100154559	calcium homeostasis modulator family member 4(CALHM4)
100625139	kelch repeat and BTB domain containing 11(KBTBD11)
Gene Group 63	Enrichment Score: 0.07724623545453675
Ensembl ID	Gene Name
100515319	G protein-coupled receptor 153(GPR153)
100739328	G protein-coupled receptor class C group 5 member D(GPRC5D)
100624186	G protein-coupled receptor class C group 5 member A(GPRC5A)
100626842	taste 1 receptor member 1(TAS1R1)
100513220	G protein-coupled receptor 83(GPR83)
414377	C-C motif chemokine receptor 9(CCR9)
414376	C-X-C motif chemokine receptor 6(CXCR6)
414375	X-C motif chemokine receptor 1(XCR1)
414374	C-C motif chemokine receptor 1(CCR1)
110256318	G protein-coupled receptor 171(GPR171)
100623410	C-C motif chemokine receptor 4(CCR4)
606743	adenosine A1 receptor(ADORA1)
100524887	proton activated chloride channel 1(PACC1)
397547	neuropeptide Y receptor Y1(NPY1R)
100627384	olfactory receptor 5K3-like(LOC100627384)
100518417	adhesion G protein-coupled receptor E2-like(LOC100518417)
100153615	G protein-coupled receptor 68(GPR68)
100525348	adhesion G protein-coupled receptor L4(ADGRL4)
397243	cysteinyl leukotriene receptor 2(CYSLTR2)
100271881	lymphocyte antigen 6 family member G6F(LY6G6F)
100155594	G protein-coupled receptor 161(GPR161)
100524003	taste 2 receptor member 41(TAS2R41)
100153787	G protein-coupled receptor 15(GPR15)
110257126	G protein-coupled receptor 35(GPR35)
100415777	thyrotropin releasing hormone receptor(TRHR)
100737352	atypical chemokine receptor 2(ACKR2)
100623444	galanin receptor 3(GALR3)
100153287	hydroxycarboxylic acid receptor 1(HCAR1)
100037292	atypical chemokine receptor 4(ACKR4)
641353	adrenoceptor alpha 2B(ADRA2B)
100153378	G protein-coupled receptor 18(GPR18)
100522832	G protein-coupled receptor 156(GPR156)
100515612	complement C5a receptor 2(C5AR2)
100152616	glutamate metabotropic receptor 4(GRM4)
110257480	histamine receptor H3(HRH3)
110261089	G protein-coupled receptor 157(GPR157)
100154607	sphingosine-1-phosphate receptor 3(S1PR3)
100512567	relaxin family peptide receptor 3(RXFP3)

## Sheet: B
Analysis	Data base	Term	Overlap	P.value	Adjusted.P.value	Odds.Ratio	Combined.Score	Genes
CvsSt	GO_Molecular_Function_2021	calcium ion binding (GO:0005509)	63/348	3.68431e-08	3.13903e-05	2.31492	39.6236	C2CD5;CALML5;CIB4;CALML4;RYR3;LOXL2;PPP3CA;CDH5;SCGN;SHH;CDH4;HPGDS;CDH3;CHP2;EFHD1;ENPP3;TGM3;TESC;TNNC2;PLSCR1;MELK;RCN2;PLA2G10;PADI2;ADAM8;CDHR5;PADI4;S100A3;CASQ1;LCP1;ASTN2;DSG4;DNASE1L3;S100A9;PADI1;S100A8;ASAH2;LRP1;FBLN1;THBS4;RASGRP3;CRACR2A;ADAMTS13;SCUBE1;SLIT1;S100A12;CDH24;SPOCK1;PLA2G2F;PLA2G2E;GALNT3;ALOX15B;SYT7;SYT6;SYT17;CRNN;CABYR;S100Z;SYT12;ACER3;OCM;DCHS1;FBN1
CvsSt	GO_Molecular_Function_2021	metal ion binding (GO:0046872)	78/517	2.3613e-06	0.00100591	1.861	24.1117	TOP2A;C2CD5;CALML5;CERK;CIB4;CALML4;RYR3;LOXL2;CDH5;PPP3CA;SCGN;SHH;CDH4;HPGDS;CDH3;CHP2;EFHD1;ENPP3;MAP3K6;TGM3;GEN1;TESC;TNNC2;ERN1;PLSCR1;MELK;RCN2;PLA2G10;PADI2;MT1G;ADAM8;TESMIN;CDHR5;PADI4;S100A3;LCP1;SIK2;CASQ1;ASTN2;DSG4;S100A9;DNASE1L3;PADI1;S100A8;NIM1K;ASAH2;LRP1;ADCY2;FBLN1;THBS4;RASGRP3;CRACR2A;ADAMTS13;SCUBE1;SLIT1;S100A12;CDH24;SPOCK1;APOE;MARK1;PLA2G2F;PLA2G2E;GALNT3;PDE2A;MT4;ALO…
CvsSt	GO_Molecular_Function_2021	receptor ligand activity (GO:0048018)	50/307	1.97382e-05	0.00560565	2.02522	21.9391	SEMA5A;TNF;ENDOU;SHH;MDK;FAM3B;FAM3D;NRTN;CER1;IL10;EDN3;IL15;SEMA6D;WNT5A;IL18;IL19;NRG1;VGF;IL1B;IFNE;CRH;HBEGF;CCL11;PTH;SEMA3B;WNT8B;SEMA3F;DPP4;WNT6;WNT11;GPNMB;FGF22;WNT3;WNT10B;GDF11;SEMA4A;WNT10A;GDF15;TNFSF12;IL34;AMBN;BMP8B;VEGFD;CCK;SEMA4F;IFNW1;BMP4;CXCL10;KITLG;IL7
CvsSt	GO_Molecular_Function_2021	cytokine activity (GO:0005125)	32/173	5.16905e-05	0.0110101	2.35318	23.2264	CXCL8;CCL11;WNT8B;TNF;WNT6;WNT11;FAM3B;CCL2;FAM3D;WNT3;IL10;WNT10B;GDF11;WNT10A;CCL23;CCL22;IL15;GDF15;IL34;WNT5A;IL18;IL19;BMP8B;NRG1;IFNW1;BMP4;CXCL10;KITLG;IL7;IFNE;IL1B;CCL27
CvsSt	GO_Molecular_Function_2021	N-acetylglucosamine 6-O-sulfotransferase activity (GO:0001517)	5/7	9.89722e-05	0.015559	25.7228	237.181	CHST7;CHST1;CHST4;CHST5;CHST2
CvsSt	GO_Molecular_Function_2021	frizzled binding (GO:0005109)	11/34	0.000109571	0.015559	4.93191	44.9738	WNT6;WNT10B;WNT10A;WNT11;BAMBI;WNT5A;CCDC88C;DVL2;WNT8B;WNT3;LRP6
CvsSt	GO_Molecular_Function_2021	Roundabout binding (GO:0048495)	5/8	0.000244535	0.0224396	17.1476	142.602	LRTM2;TGFB1I1;LRTM1;SLIT1;LGR6
CvsSt	GO_Molecular_Function_2021	sialyltransferase activity (GO:0008373)	8/21	0.000269442	0.0224396	6.33867	52.0985	ST8SIA1;ST8SIA2;ST8SIA4;ST3GAL5;ST8SIA5;ST3GAL6;ST6GALNAC3;ST3GAL1
CvsSt	GO_Molecular_Function_2021	3',5'-cyclic-AMP phosphodiesterase activity (GO:0004115)	6/12	0.000280588	0.0224396	10.2927	84.1797	PDE1B;PDE2A;PDE3A;PDE4B;PDE4A;PDE7B
CvsSt	GO_Molecular_Function_2021	protein-arginine deiminase activity (GO:0004668)	4/5	0.000287962	0.0224396	41.1354	335.364	PADI3;PADI2;PADI4;PADI1
CvsSt	GO_Molecular_Function_2021	voltage-gated cation channel activity (GO:0022843)	20/97	0.000289713	0.0224396	2.68423	21.8674	KCNH2;KCNG2;HCN3;KCNE1;KCND1;KCNJ11;CACNA2D3;CACNA1C;OPRM1;CACNA1F;KCNA7;TMC2;CACNA1I;CACNG8;KCNS1;KCNS3;KCNQ4;CACNA1S;HCN2;HCN1
CvsSt	GO_Molecular_Function_2021	sulfotransferase activity (GO:0008146)	11/40	0.000538401	0.0382265	3.91023	29.4319	CHST8;GAL3ST1;CHST7;CHST11;SULT1E1;CHST15;CHST1;CHST4;CHST5;HS3ST1;CHST2
CvsSt	GO_Molecular_Function_2021	serine-type endopeptidase inhibitor activity (GO:0004867)	14/60	0.000628312	0.0411786	3.13986	23.1485	SERPINB3;WFDC12;SERPINB13;AMBP;SERPINC1;SERPINF1;SERPINB7;WFDC5;WFDC2;WFDC3;SLPI;SPOCK1;PI3;A2M
CvsSt	GO_Molecular_Function_2021	voltage-gated potassium channel activity (GO:0005249)	17/82	0.000752164	0.0427512	2.69999	19.4198	KCNH2;KCNG2;KCNK6;HCN3;KCNE1;KCND1;KCNJ10;KCNJ11;KCNE4;KCNJ13;KCNA7;KCNS1;KCNS3;KCNQ4;KCNK2;HCN2;HCN1
CvsSt	GO_Molecular_Function_2021	calmodulin-dependent protein kinase activity (GO:0004683)	8/24	0.000764836	0.0427512	5.14932	36.9508	CAMK2B;CAMK1D;DAPK1;MKNK1;CAMK2A;MKNK2;CAMKK1;CAMK1G
CvsSt	GO_Molecular_Function_2021	alpha-N-acetylneuraminate alpha-2,8-sialyltransferase activity (GO:0003828)	4/6	0.000802839	0.0427512	20.5666	146.585	ST8SIA1;ST8SIA2;ST8SIA4;ST8SIA5
CvsSt	GO_Molecular_Function_2021	potassium channel activity (GO:0005267)	18/91	0.000955278	0.0478763	2.54584	17.7025	KCNH2;KCNG2;KCNK6;HCN3;KCNE1;KCND1;KCNK9;KCNJ11;GRIK4;KCNA7;KCNS1;KCNS3;KCNQ4;KCNN4;KCNK2;HCN2;KCNK3;HCN1
CvsSt	GO_Molecular_Function_2021	chemorepellent activity (GO:0045499)	8/25	0.00103796	0.0491299	4.84615	33.2955	SEMA5A;DPP4;SEMA4A;SEMA6D;SEMA3B;NRG1;SEMA4F;SEMA3F
CvsSt	GO_Molecular_Function_2021	chemokine receptor activity (GO:0004950)	8/26	0.00138371	0.0536725	4.57667	30.1282	CCR1;XCR1;GPR35;CCR9;ACKR4;ACKR2;CXCR6;CCR4
CvsSt	GO_Molecular_Function_2021	sodium channel activity (GO:0005272)	10/38	0.00138547	0.0536725	3.67983	24.2196	HCN3;CACNA1I;SCNN1G;SHROOM2;GRIK4;SCN4A;ASIC2;SCN4B;HCN2;HCN1
CvsSt	GO_Molecular_Function_2021	chemokine binding (GO:0019956)	9/32	0.00143299	0.0536725	4.03063	26.3925	CCR1;XCR1;ITGA4;ITGB3;CCR9;ACKR4;ACKR2;CXCR6;CCR4
CvsSt	GO_Molecular_Function_2021	neutral amino acid transmembrane transporter activity (GO:0015175)	9/32	0.00143299	0.0536725	4.03063	26.3925	SLC7A5;SLC6A19;SLC6A7;SLC7A8;SLC7A9;SLC3A2;SLC1A5;SLC38A3;MFSD12
CvsSt	GO_Molecular_Function_2021	copper ion binding (GO:0005507)	11/45	0.00156486	0.0536725	3.33428	21.5393	DCT;GPC1;ALB;S100A12;SNCG;APOA4;ATP13A2;DBH;TYR;MT3;LOXL2
CvsSt	GO_Molecular_Function_2021	carbonate dehydratase activity (GO:0004089)	5/11	0.00160639	0.0536725	8.57237	55.1526	CA11;CA2;CA5A;CA4;CA14
CvsSt	GO_Molecular_Function_2021	hydrolase activity, acting on carbon-nitrogen (but not peptide) bonds, in linear amidines (GO:0016813)	5/11	0.00160639	0.0536725	8.57237	55.1526	DDAH2;PADI3;PADI2;PADI4;PADI1
CvsSt	GO_Molecular_Function_2021	3',5'-cyclic-nucleotide phosphodiesterase activity (GO:0004114)	7/21	0.00163789	0.0536725	5.14698	33.0145	PDE1B;PDE2A;PDE3A;PDE4B;PDE4A;PDE6B;PDE7B
CvsSt	GO_Molecular_Function_2021	organic anion transmembrane transporter activity (GO:0008514)	24/144	0.00193195	0.0609637	2.06667	12.9151	SLC27A1;SLC23A1;CTNS;SLC4A1;SLCO5A1;SLC3A2;SLC1A5;MFSD12;SLC7A2;SLC7A5;SLC4A8;GJA1;SLC6A7;SLC7A8;SLCO3A1;SLC7A9;SLCO2A1;SLC25A42;SLC38A3;SLC13A5;SLC26A3;CFTR;SFXN5;SLC26A5
CvsSt	GO_Molecular_Function_2021	sodium ion transmembrane transporter activity (GO:0015081)	8/28	0.00234565	0.0713747	4.11855	24.9386	SLC9A2;SCNN1G;SLC4A8;SLC9A5;SLC23A1;SLC3A2;SLC9C1;SLC9B2
CvsSt	GO_Molecular_Function_2021	G protein-coupled chemoattractant receptor activity (GO:0001637)	6/17	0.00254766	0.0725166	5.61263	33.5219	CCR1;XCR1;ACKR4;CCR9;ACKR2;CCR4
CvsSt	GO_Molecular_Function_2021	cAMP binding (GO:0030552)	5/12	0.0025534	0.0725166	7.34734	43.866	PDE2A;PDE4B;PDE4A;BVES;HCN1
CvsSt	GO_Molecular_Function_2021	ion channel activity (GO:0005216)	16/84	0.00268226	0.0735772	2.42727	14.3721	GRIA1;GRIA2;CHRNA4;MCUB;TRPV2;GRIK4;TRPV3;NALCN;CALHM4;TMC2;TRPM1;SCNN1G;TRPV5;PIEZO2;TRPM6;KCNK3
CvsSt	GO_Molecular_Function_2021	flavin adenine dinucleotide binding (GO:0050660)	12/55	0.00276346	0.0735772	2.87629	16.945	FOXRED2;ACADVL;ACOXL;POR;STEAP4;DAO;NOS3;LDHD;SQOR;CYBB;NOX4;XDH
CvsSt	GO_Molecular_Function_2021	C-C chemokine receptor activity (GO:0016493)	7/23	0.00294944	0.0739095	4.50311	26.2357	CCR1;XCR1;ACKR4;CCR9;ACKR2;CXCR6;CCR4
CvsSt	GO_Molecular_Function_2021	cyclic-nucleotide phosphodiesterase activity (GO:0004112)	7/23	0.00294944	0.0739095	4.50311	26.2357	PDE1B;PDE2A;PDE3A;PDE4B;PDE4A;PDE6B;PDE7B
CvsSt	GO_Molecular_Function_2021	amino acid transmembrane transporter activity (GO:0015171)	11/49	0.00323345	0.0787115	2.98264	17.1031	SLC7A5;SLC6A19;SLC7A8;SLC7A9;SLC7A13;SLC38A11;SLC3A2;SLC7A11;SLC1A5;SLC38A3;SLC7A2
CvsSt	GO_Molecular_Function_2021	solute:sodium symporter activity (GO:0015370)	8/30	0.00376544	0.0862983	3.74373	20.8971	SLC4A8;SLC5A7;SLC4A9;SLC5A9;SLC20A2;SLC13A5;SLC17A1;SLC28A3
CvsSt	GO_Molecular_Function_2021	GDP-dissociation inhibitor activity (GO:0005092)	5/13	0.00384805	0.0862983	6.42857	35.7441	GPSM1;GPSM2;EIF5;ARHGDIB;SH3BP4
CvsSt	GO_Molecular_Function_2021	C-C chemokine binding (GO:0019957)	7/24	0.00384899	0.0862983	4.23799	23.563	CCR1;XCR1;ACKR4;CCR9;ACKR2;CXCR6;CCR4
CvsSt	GO_Molecular_Function_2021	carboxylic ester hydrolase activity (GO:0052689)	17/96	0.00442993	0.096777	2.2198	12.0299	PLA2G2F;LYPLA2;FAAH;PLA2G2E;ABHD2;CEL;PLA2G7;PRDX6;PLB1;LIPE;CA2;NDST3;ASPG;PLA2G10;NOTUM;PNPLA1;CES1
CvsSt	GO_Molecular_Function_2021	ankyrin binding (GO:0030506)	6/19	0.00478613	0.100688	4.74863	25.3673	PTPRC;KCNJ11;SLC4A1;NRCAM;RHCG;SPTB
CvsSt	GO_Molecular_Function_2021	metallopeptidase activity (GO:0008237)	20/121	0.00484532	0.100688	2.04369	10.8923	MIPEP;MMP9;ADAMTS10;THSD4;MMP20;ADAM28;ADAMTS13;BMP1;ASTL;MMP15;ANPEP;PAPPA;ADAMTS18;ADAM12;ADAMTS17;ADAMTSL2;ADAM23;ADAM9;ADAM8;LAP3
CvsSt	GO_Molecular_Function_2021	cation channel activity (GO:0005261)	17/98	0.00549193	0.11053	2.16475	11.2664	SLC24A4;KCNK9;TMEM63C;TRPV2;TRPV3;OTOP2;NALCN;CALHM4;TRPM1;SCNN1G;TRPV5;PIEZO2;KCNQ4;TRPM6;SLC24A5;KCNK3;HCN1
CvsSt	GO_Molecular_Function_2021	endopeptidase inhibitor activity (GO:0004866)	19/115	0.00596589	0.11053	2.04202	10.4586	WFDC12;SERPINB3;LXN;SERPINB13;AMBP;AHSG;SERPINC1;SERPINF1;SERPINB7;WFDC5;KNG1;WFDC2;WFDC3;SLPI;FETUB;SPOCK1;PI3;A2M;LTF
CvsSt	GO_Molecular_Function_2021	L-leucine transmembrane transporter activity (GO:0015190)	3/5	0.00609454	0.11053	15.4162	78.6284	SLC7A5;SLC7A8;SLC3A2
CvsSt	GO_Molecular_Function_2021	lipid kinase activity (GO:0001727)	3/5	0.00609454	0.11053	15.4162	78.6284	CERKL;CERK;SPHK2
CvsSt	GO_Molecular_Function_2021	syndecan binding (GO:0045545)	3/5	0.00609454	0.11053	15.4162	78.6284	SEMA5A;GPNMB;HPSE
CvsSt	GO_Molecular_Function_2021	L-amino acid transmembrane transporter activity (GO:0015179)	11/53	0.00609732	0.11053	2.69799	13.7595	SLC7A5;SLC6A7;SLC7A8;SLC7A9;SLC7A13;CTNS;SLC3A2;SLC7A11;SLC1A5;SLC38A3;SLC7A2
CvsSt	GO_Molecular_Function_2021	channel activity (GO:0015267)	10/46	0.00622865	0.110559	2.86083	14.529	TMEM266;SLC14A1;SCNN1G;AQP12A;MCUB;TRPV5;TRPV2;TRPV3;AQP5;KCNK3
CvsSt	GO_Molecular_Function_2021	delayed rectifier potassium channel activity (GO:0005251)	8/33	0.00703653	0.122349	3.29394	16.3269	KCNH2;KCNG2;KCNE1;KCNS1;KCNE4;KCNS3;KCNQ4;KCNA7
CvsSt	GO_Molecular_Function_2021	transition metal ion binding (GO:0046914)	55/445	0.00766872	0.126605	1.46139	7.11785	CDA;HHIP;CHD3;DBH;LOXL2;ENDOU;SHH;CA2;ANPEP;DHX58;ME1;DPF3;ENPP3;RC3H1;TET1;APOA4;MMP9;PLSCR1;DCT;PAPPA;MT1G;ADAM8;S100A9;SMPDL3A;S100A8;LTF;ASAH2;MTARC2;UHRF1;ALOX15;ADCY2;CXXC5;CXXC4;KNG1;ADAMTS13;ALOX5;GPC1;S100A12;EGR1;ZNF185;GALNT3;NOS3;GALNT1;PDE2A;TYR;ALOX15B;MT3;BHMT;CD4;QPCT;ALB;ACER3;LCN2;ATP13A2;ADA
CvsSt	GO_Molecular_Function_2021	G protein-coupled receptor binding (GO:0001664)	22/143	0.0077126	0.126605	1.87654	9.12919	WNT10B;WNT10A;RTP3;PTH;PTCH1;WNT5A;PTCH2;WNT8B;ARR3;BICD1;LRP6;WNT6;MARCO;CORT;WNT11;BAMBI;CCDC88C;AGTR1;DVL2;HOMER3;GNAT1;WNT3
CvsSt	GO_Molecular_Function_2021	bicarbonate transmembrane transporter activity (GO:0015106)	5/15	0.00772708	0.126605	5.14229	25.0071	SLC4A8;SLC4A1;SLC26A3;CFTR;SLC26A5
CvsSt	GO_Molecular_Function_2021	MAP kinase tyrosine/serine/threonine phosphatase activity (GO:0017017)	4/10	0.0084045	0.132604	6.85403	32.7553	DUSP4;DUSP5;DUSP2;DUSP8
CvsSt	GO_Molecular_Function_2021	protein tyrosine/threonine phosphatase activity (GO:0008330)	4/10	0.0084045	0.132604	6.85403	32.7553	DUSP4;DUSP5;DUSP2;DUSP8
CvsSt	GO_Molecular_Function_2021	lipase activity (GO:0016298)	10/49	0.00985071	0.146986	2.64033	12.1989	SMPD3;LIPE;FAAH;LIPH;ABHD2;PLA2G10;CEL;PLB1;PNPLA1;CES1
CvsSt	GO_Molecular_Function_2021	chloride transmembrane transporter activity (GO:0015108)	5/16	0.0104297	0.146986	4.67455	21.3304	SLC4A8;SLC4A1;SLC26A3;CFTR;SLC26A5
CvsSt	GO_Molecular_Function_2021	potassium ion antiporter activity (GO:0022821)	5/16	0.0104297	0.146986	4.67455	21.3304	SLC9A2;SLC24A4;SLC9A5;SLC9C1;SLC24A5
CvsSt	GO_Molecular_Function_2021	transmembrane receptor protein phosphatase activity (GO:0019198)	5/16	0.0104297	0.146986	4.67455	21.3304	PTPRD;PTPRE;PTPRC;PTPRK;PTPRG
CvsSt	GO_Molecular_Function_2021	transmembrane receptor protein tyrosine phosphatase activity (GO:0005001)	5/16	0.0104297	0.146986	4.67455	21.3304	PTPRD;PTPRE;PTPRC;PTPRK;PTPRG
CvsSt	GO_Molecular_Function_2021	voltage-gated sodium channel activity (GO:0005248)	6/22	0.0104536	0.146986	3.85763	17.5939	HCN3;CACNA1I;SCN4A;SCN4B;HCN2;HCN1
CvsSt	GO_Molecular_Function_2021	arachidonic acid binding (GO:0050544)	3/6	0.0113863	0.146986	10.2769	45.9928	ALOX5AP;S100A9;S100A8
CvsSt	GO_Molecular_Function_2021	carnitine O-acyltransferase activity (GO:0016406)	3/6	0.0113863	0.146986	10.2769	45.9928	CPT1A;CPT1C;CRAT
CvsSt	GO_Molecular_Function_2021	dihydropyrimidinase activity (GO:0004157)	3/6	0.0113863	0.146986	10.2769	45.9928	DPYSL4;DPYSL2;DPYSL3
CvsSt	GO_Molecular_Function_2021	icosatetraenoic acid binding (GO:0050543)	3/6	0.0113863	0.146986	10.2769	45.9928	ALOX5AP;S100A9;S100A8
CvsSt	GO_Molecular_Function_2021	nucleosomal histone binding (GO:0031493)	3/6	0.0113863	0.146986	10.2769	45.9928	SPHK2;UHRF1;VRK1
CvsSt	GO_Molecular_Function_2021	sulfur amino acid transmembrane transporter activity (GO:0000099)	3/6	0.0113863	0.146986	10.2769	45.9928	SLC7A9;CTNS;MFSD12
CvsSt	GO_Molecular_Function_2021	filamin binding (GO:0031005)	4/11	0.0122892	0.15437	5.87456	25.8424	DPYSL4;DPYSL3;RFLNB;RFLNA
CvsSt	GO_Molecular_Function_2021	protein kinase regulator activity (GO:0019887)	16/98	0.0123206	0.15437	2.01131	8.84268	GMFG;CCNF;SPRY4;MT3;CXCL10;TPX2;CCNA1;SOCS1;SH3BP5L;GPRC5A;WNT11;PRKAR1B;APC;CCNI2;GPRC5D;CCNO
CvsSt	GO_Molecular_Function_2021	cyclic nucleotide binding (GO:0030551)	6/23	0.0131022	0.159472	3.63051	15.7382	PDE2A;PDE4B;CNGA2;PDE4A;BVES;HCN1
CvsSt	GO_Molecular_Function_2021	semaphorin receptor binding (GO:0030215)	6/23	0.0131022	0.159472	3.63051	15.7382	SEMA5A;SEMA4A;SEMA6D;SEMA3B;SEMA4F;SEMA3F
CvsSt	GO_Molecular_Function_2021	glutamate receptor binding (GO:0035254)	5/17	0.013714	0.164567	4.28477	18.3789	IGSF11;DLG4;CAMK2A;HOMER3;SHISA7
CvsSt	GO_Molecular_Function_2021	voltage-gated calcium channel activity (GO:0005245)	8/37	0.0142602	0.168745	2.83898	12.0665	CACNA1I;CACNG8;CACNA2D3;CACNA1C;CACNA1S;OPRM1;CACNA1F;TMC2
CvsSt	GO_Molecular_Function_2021	sterol binding (GO:0032934)	11/60	0.0155081	0.179347	2.31167	9.63134	NPC1;INSIG1;PTCH1;SCP2D1;TSPO;RORA;APOA4;PMP2;APOD;OSBPL1A;ABCG1
CvsSt	GO_Molecular_Function_2021	calcium channel activity (GO:0005262)	14/84	0.0155771	0.179347	2.06061	8.57618	SLC24A4;CACNA2D3;TRPV2;TRPV3;OPRM1;CACNA1C;CACNA1F;TMC2;TRPM1;CACNA1I;CACNG8;TRPV5;CACNA1S;SLC24A5
CvsSt	GO_Molecular_Function_2021	ATP hydrolysis activity (GO:0140603)	9/45	0.0159276	0.180938	2.57329	10.6526	VWA8;SLFN11;KIF26A;ABCA3;KIF14;CHD3;CHD1L;ABCD1;CFTR
CvsSt	GO_Molecular_Function_2021	cell adhesion mediator activity (GO:0098631)	6/24	0.0161865	0.18146	3.42863	14.1382	NEXN;EMB;LRRC4C;IGSF9;MYPN;JAM3
CvsSt	GO_Molecular_Function_2021	MAP kinase phosphatase activity (GO:0033549)	4/12	0.017157	0.187408	5.13995	20.8957	DUSP4;DUSP5;DUSP2;DUSP8
CvsSt	GO_Molecular_Function_2021	sodium:proton antiporter activity (GO:0015385)	4/12	0.017157	0.187408	5.13995	20.8957	SLC9A2;SLC9A5;SLC9C1;SLC9B2
CvsSt	GO_Molecular_Function_2021	oxidoreductase activity, acting on single donors with incorporation of molecular oxygen, incorporation of two atoms of oxygen (GO:0016702)	5/18	0.0176281	0.190115	3.95496	15.9712	ALOX5;ALOX15;BCO2;ALOX15B;IDO1
CvsSt	GO_Molecular_Function_2021	branched-chain amino acid transmembrane transporter activity (GO:0015658)	3/7	0.01862	0.191135	7.70728	30.7021	SLC7A5;SLC7A8;SLC3A2
CvsSt	GO_Molecular_Function_2021	icosanoid binding (GO:0050542)	3/7	0.01862	0.191135	7.70728	30.7021	ALOX5AP;S100A9;S100A8
CvsSt	GO_Molecular_Function_2021	long-chain fatty acid binding (GO:0036041)	3/7	0.01862	0.191135	7.70728	30.7021	FABP3;FABP4;PPARD
CvsSt	GO_Molecular_Function_2021	threonine-type peptidase activity (GO:0070003)	3/7	0.01862	0.191135	7.70728	30.7021	GGT5;PRSS50;GGT1
CvsSt	GO_Molecular_Function_2021	leak channel activity (GO:0022840)	5/19	0.0222145	0.225318	3.67226	13.9803	KCNK6;KCNK9;NALCN;KCNK2;KCNK3
CvsSt	GO_Molecular_Function_2021	cytokine receptor activity (GO:0004896)	14/88	0.0227077	0.225948	1.9488	7.3763	CCR1;XCR1;IFNGR2;IL1R2;GFRA1;GFRA2;CSF2RA;CD4;CCR9;ACKR4;ACKR2;CCR4;IFNAR1;IL12RB2
CvsSt	GO_Molecular_Function_2021	BMP receptor binding (GO:0070700)	4/13	0.0230722	0.225948	4.5686	17.2196	BMP4;CDH5;GDF15;BMP8B
CvsSt	GO_Molecular_Function_2021	monovalent cation:proton antiporter activity (GO:0005451)	4/13	0.0230722	0.225948	4.5686	17.2196	SLC9A2;SLC9A5;SLC9C1;SLC9B2
CvsSt	GO_Molecular_Function_2021	cation transmembrane transporter activity (GO:0008324)	9/48	0.023749	0.229933	2.37495	8.88283	SLC7A5;SLC6A7;SLC7A8;SLC29A4;SLC3A2;SLC1A5;SLC38A3;MFSD12;SLC7A2
CvsSt	GO_Molecular_Function_2021	carboxylic acid transmembrane transporter activity (GO:0046943)	10/57	0.0272168	0.252419	2.18995	7.8924	SLC7A5;SLC7A8;SLC23A1;SLC16A6;SLC6A12;SLC38A11;SLC38A3;SLC7A2;SLC16A5;SLC16A13
CvsSt	GO_Molecular_Function_2021	arginine binding (GO:0034618)	3/8	0.0278491	0.252419	6.16548	22.0783	NOS3;NAGS;PADI4
CvsSt	GO_Molecular_Function_2021	calcium-dependent protein kinase activity (GO:0010857)	3/8	0.0278491	0.252419	6.16548	22.0783	MKNK1;CAMK2A;MKNK2
CvsSt	GO_Molecular_Function_2021	calcium-dependent protein serine/threonine kinase activity (GO:0009931)	3/8	0.0278491	0.252419	6.16548	22.0783	MKNK1;CAMK2A;MKNK2
CvsSt	GO_Molecular_Function_2021	coreceptor activity involved in Wnt signaling pathway (GO:0071936)	3/8	0.0278491	0.252419	6.16548	22.0783	PTK7;ROR1;LRP6
CvsSt	GO_Molecular_Function_2021	iron ion transmembrane transporter activity (GO:0005381)	3/8	0.0278491	0.252419	6.16548	22.0783	SLC25A37;TTYH1;SLC40A1
CvsSt	GO_Molecular_Function_2021	gated channel activity (GO:0022836)	4/14	0.0300801	0.266961	4.11151	14.4063	TMEM266;PACC1;PIEZO2;TMC2
CvsSt	GO_Molecular_Function_2021	metal ion:proton antiporter activity (GO:0051139)	4/14	0.0300801	0.266961	4.11151	14.4063	SLC9A2;SLC9A5;SLC9C1;SLC9B2
CvsSt	GO_Molecular_Function_2021	fibroblast growth factor binding (GO:0017134)	5/21	0.0335406	0.294604	3.21287	10.9077	KLB;ITGB3;GPC1;FGFBP3;FGFR1
CvsSt	GO_Molecular_Function_2021	tubulin binding (GO:0015631)	37/307	0.0350623	0.304827	1.41481	4.74052	MTCL1;KIF14;FMN1;KIF17;SKA1;NCALD;GJA1;MAP6;FYN;KIF21B;FAM83D;MARK4;GAS2L2;DLGAP5;SYBU;RAB11FIP5;GAS2L3;MX1;KIF22;ARL4C;TPX2;AGBL4;CLIP2;EML6;TTLL4;NAV3;APC;KIFC1;KIF26A;MAP1A;CCDC88C;TRIM36;TTLL11;KIF2C;EFHC2;S100A9;S100A8
CvsSt	GO_Molecular_Function_2021	insulin-like growth factor binding (GO:0005520)	4/15	0.0382084	0.308594	3.73753	12.2019	IGFBP4;ITGB3;IGFBP2;IGFALS
CvsSt	GO_Molecular_Function_2021	solute:anion antiporter activity (GO:0140323)	4/15	0.0382084	0.308594	3.73753	12.2019	SLC4A1;SLC7A11;SLC26A3;SLC26A5
CvsSt	GO_Molecular_Function_2021	aromatic amino acid transmembrane transporter activity (GO:0015173)	3/9	0.0390633	0.308594	5.13762	16.6591	SLC7A5;SLC3A2;SLC38A3
CvsSt	GO_Molecular_Function_2021	guanylate kinase activity (GO:0004385)	3/9	0.0390633	0.308594	5.13762	16.6591	DLG2;MAGI3;CARD11
CvsSt	GO_Molecular_Function_2021	intracellular cAMP-activated cation channel activity (GO:0005222)	3/9	0.0390633	0.308594	5.13762	16.6591	CNGA2;HCN2;HCN1
CvsSt	GO_Molecular_Function_2021	L-alanine transmembrane transporter activity (GO:0015180)	3/9	0.0390633	0.308594	5.13762	16.6591	SLC7A8;SLC3A2;SLC38A3
CvsSt	GO_Molecular_Function_2021	mannosidase activity (GO:0015923)	3/9	0.0390633	0.308594	5.13762	16.6591	MANBA;MAN2B2;MANEAL
CvsSt	GO_Molecular_Function_2021	protein-glutamine gamma-glutamyltransferase activity (GO:0003810)	3/9	0.0390633	0.308594	5.13762	16.6591	TGM7;TGM6;TGM3
CvsSt	GO_Molecular_Function_2021	RAGE receptor binding (GO:0050786)	3/9	0.0390633	0.308594	5.13762	16.6591	S100A12;S100A9;S100A8
CvsSt	GO_Molecular_Function_2021	phospholipase A2 activity (GO:0004623)	6/29	0.0391175	0.308594	2.68254	8.69459	PLA2G2F;PLA2G2E;PLA2G10;PLA2G7;PRDX6;PLB1
CvsSt	GO_Molecular_Function_2021	protein tyrosine/serine/threonine phosphatase activity (GO:0008138)	5/22	0.0403309	0.315247	3.02372	9.70806	DUSP4;DUSP5;DUSP2;DUSP15;DUSP8
CvsSt	GO_Molecular_Function_2021	neuropeptide receptor activity (GO:0008188)	6/30	0.0453557	0.3513	2.57062	7.9515	GPR143;GAL;GALR3;NPY1R;OPRM1;SORCS2
CvsSt	GO_Molecular_Function_2021	iron ion binding (GO:0005506)	9/54	0.0468965	0.354761	2.05761	6.2959	MIOX;PHYH;TF;ALOX5;ALOX15;LCN2;TET1;ALOX15B;LTF
CvsSt	GO_Molecular_Function_2021	organic cation transmembrane transporter activity (GO:0015101)	4/16	0.047468	0.354761	3.42588	10.4411	SLC5A7;SLC7A8;SLC29A4;SLC25A42
CvsSt	GO_Molecular_Function_2021	potassium ion leak channel activity (GO:0022841)	4/16	0.047468	0.354761	3.42588	10.4411	KCNK6;KCNK9;KCNK2;KCNK3
CvsSt	GO_Molecular_Function_2021	transmembrane receptor protein serine/threonine kinase binding (GO:0070696)	4/16	0.047468	0.354761	3.42588	10.4411	BMP4;CDH5;GDF15;BMP8B
CvsSt	GO_Molecular_Function_2021	phosphatidylinositol phospholipase C activity (GO:0004435)	5/23	0.0478944	0.354835	2.85557	8.6774	CCR1;EDNRA;PLCB4;PLCG2;PLCD1
CvsSt	GO_Molecular_Function_2021	ligand-gated cation channel activity (GO:0099094)	12/80	0.0493193	0.355814	1.81633	5.46612	KCNH2;GRIA1;KCNK6;SCNN1G;GRIA2;KCNJ10;KCNJ11;CHRNA4;KCNJ13;SHROOM2;GRIK4;ASIC2
CvsSt	GO_Biological_Process_2021	regulation of neurotransmitter receptor activity (GO:0099601)	20/58	5.68404e-08	0.00025618	5.45079	90.9356	CAMK2B;GRIA1;PRRT1;GRIA2;LYNX1;ACTN2;DAPK1;CAMK2A;OPRM1;SHISA7;CRHBP;CACNG8;DLG2;NETO1;DLG4;CRH;NEFL;NPTX1;DLGAP3;NPTX2
CvsSt	GO_Biological_Process_2021	regulation of NMDA receptor activity (GO:2000310)	14/32	1.82728e-07	0.000411778	8.03645	124.688	CAMK2B;GRIA1;GRIA2;ACTN2;DAPK1;CAMK2A;OPRM1;CRHBP;DLG2;DLG4;CRH;CCL2;NEFL;EPHB2
CvsSt	GO_Biological_Process_2021	axonogenesis (GO:0007409)	46/240	4.71968e-07	0.000709053	2.47119	35.9962	SEMA5A;NLGN3;SPTBN5;NRP2;LRTM2;LRTM1;SEMA3B;NEXN;SEMA3F;IGSF9;MYPN;RAP1GAP;ROBO1;SHH;EFNB3;TUBB3;GPC1;SLITRK4;SLIT1;SLITRK6;NRCAM;NRTN;FYN;NCAM1;EMB;EPHB2;LGI1;LYPLA2;SEMA4A;UNC5B;SEMA6D;WNT5A;FRS2;GFRA1;CCK;SEMA4F;GFRA2;SPTB;DOK1;DOK2;ACTBL2;ADGRB1;MAP1A;PLA2G10;LGR6;EPHA2
CvsSt	GO_Biological_Process_2021	axon guidance (GO:0007411)	40/203	1.24808e-06	0.00140627	2.55308	34.7063	SEMA5A;SPTBN5;NRP2;LRTM2;LRTM1;SEMA3B;NEXN;NTN5;SEMA3F;IGSF9;MYPN;RAP1GAP;ROBO1;SHH;ALCAM;EFNB3;TUBB3;GPC1;SLIT1;NRTN;FYN;NCAM1;EMB;EPHB2;LGI1;LYPLA2;SEMA4A;UNC5B;SEMA6D;WNT5A;FRS2;GFRA1;SEMA4F;GFRA2;SPTB;DOK1;DOK2;PLA2G10;LGR6;EPHA2
CvsSt	GO_Biological_Process_2021	acylglycerol catabolic process (GO:0046464)	13/35	4.66217e-06	0.00420248	6.10081	74.8937	LYPLA2;FAAH;DAGLA;ABHD2;FABP9;LIPE;FABP3;FABP4;FABP5;FABP6;LIPH;FABP7;PNPLA1
CvsSt	GO_Biological_Process_2021	external encapsulating structure organization (GO:0045229)	40/217	6.96095e-06	0.00522883	2.34932	27.8986	COL15A1;COL16A1;COL14A1;LAMC3;NCAN;ITGB3;COL11A2;NID1;ADAMTS10;COL19A1;LOXL1;THSD4;MMP20;ADAMTS13;ADAMTS18;ADAMTS17;ADAMTSL2;KDR;COL10A1;ITGB6;TGM3;JAM3;COL28A1;COL27A1;MIA;ITGA4;VWF;APLP1;HSPG2;MMP9;COL1A1;MMP15;COL6A2;ADAM12;COL6A1;MATN1;COL6A3;ITGA7;MATN4;FBN1
CvsSt	GO_Biological_Process_2021	inorganic cation transmembrane transport (GO:0098662)	47/274	8.73664e-06	0.00562515	2.15515	25.1031	KCNG2;KCNK6;HCN3;KCNE1;SLC24A4;KCNK9;SLC40A1;CACNA1C;KCNA7;SLC9C1;NALCN;RYR3;RHD;TRPM1;UCP3;ATP6V0A4;KCNN4;ASIC2;TRPM6;KCNH2;SLC6A19;KCND1;KCNJ10;SLC6A17;KCNJ11;TRPV2;SLC6A12;TRPV3;SLC30A1;OTOP2;SLC9A2;SCNN1G;SLC4A8;SLC6A7;SLC9A5;KCNS1;KCNS3;TRPV5;KCNQ4;SCN4A;RHCG;SCN4B;KCNK2;SLC24A5;HCN2;KCNK3;HCN1
CvsSt	GO_Biological_Process_2021	extracellular matrix organization (GO:0030198)	50/300	1.04093e-05	0.00586433	2.08273	23.8948	COL16A1;COL14A1;LAMC3;NCAN;ITGB3;LOXL1;MMP20;LOXL2;ADAMTSL2;KDR;COL10A1;ITGB6;COL27A1;MIA;ITGA4;VWF;APLP1;P3H4;HSPG2;MMP9;MMP15;COL6A2;ADAM12;COL6A1;MATN1;COL6A3;ITGA7;ADAM8;LCP1;MATN4;COL15A1;COL11A2;NID1;ADAMTS10;COL19A1;THSD4;ADAMTS13;SCUBE1;ADAMTS18;HAS1;ADAMTS17;A2M;JAM3;COL28A1;CMA1;COL1A1;BMP1;P4HA3;TLL2;FBN1
CvsSt	GO_Biological_Process_2021	extracellular structure organization (GO:0043062)	39/216	1.48639e-05	0.00744351	2.28927	25.4488	COL15A1;COL16A1;COL14A1;LAMC3;NCAN;ITGB3;COL11A2;NID1;ADAMTS10;COL19A1;LOXL1;THSD4;MMP20;ADAMTS13;ADAMTS18;ADAMTS17;ADAMTSL2;KDR;COL10A1;ITGB6;JAM3;COL28A1;COL27A1;MIA;ITGA4;VWF;APLP1;HSPG2;MMP9;COL1A1;MMP15;COL6A2;ADAM12;COL6A1;MATN1;COL6A3;ITGA7;MATN4;FBN1
CvsSt	GO_Biological_Process_2021	amino acid transport (GO:0006865)	15/50	1.78868e-05	0.00806156	4.42662	48.3894	SLC6A19;SLC6A17;SLC7A13;SLC6A12;SLC38A11;SLC3A2;SLC7A11;SLC1A5;SLC7A2;SLC25A48;SLC7A5;SLC7A8;SLC7A9;SH3BP4;SLC38A3
CvsSt	GO_Biological_Process_2021	nervous system development (GO:0007399)	66/447	2.77331e-05	0.011363	1.80755	18.9664	CHRM2;SEMA5A;DAGLA;NCAN;MSI1;CELSR1;ROBO1;SHH;EDNRB;DPYSL4;MDK;DPYSL2;ADORA1;DPF3;NRCAM;NRTN;CHAC1;EPHB2;SOX6;CER1;CHST8;KIRREL3;EMX1;RBFOX1;RBFOX3;APLP1;NRG1;GFRA1;NAV1;NAV2;GFRA2;IGFN1;NAV3;ADGRB1;NLGN3;DLX6;WNT8B;NTN5;CLN8;VXN;PTS;TRAK2;EFNB3;ERBB4;ADAM23;SLITRK6;ST8SIA4;SPOCK1;NPTX1;IGF2BP2;ASIC2;MARK4;LGI1;GDF11;ST8SIA2;SEMA4F;MERTK;NFASC;GJB1;APC;DLG4;FABP7;DCHS1;LRCH4;SCRG1;NES
CvsSt	GO_Biological_Process_2021	phenol-containing compound biosynthetic process (GO:0046189)	6/9	3.22666e-05	0.0121188	20.5887	212.918	DDC;CITED1;DCT;TYRP1;DBH;TYR
CvsSt	GO_Biological_Process_2021	negative regulation of signal transduction (GO:0009968)	44/267	4.54818e-05	0.0157682	2.05067	20.503	NDRG4;ASAH2;CXCL8;CITED1;LRP1;HHIP;PALM3;GATA4;APCDD1;GATA2;TNF;CXXC4;NKD1;NKD2;CRHBP;HERC4;CYP26B1;SOCS1;KCTD21;GPC1;APOD;CHAC1;XDH;CER1;BEND6;IL10;EGFL7;SRMS;PRKCB;AHSG;GDF15;PTCH1;PTCH2;SPRY4;KLK14;SULF1;PTPRE;TSPAN15;PTPRC;KIF26A;IL1B;NOTUM;MDFI;LTF
CvsSt	GO_Biological_Process_2021	regulation of inflammatory response (GO:0050727)	36/206	6.3342e-05	0.0203916	2.19724	21.2406	DAGLA;ALOX15;RORA;PLA2G7;TNF;C1QTNF3;CDH5;MDK;ALOX5;S100A12;APOE;ENPP3;GGT1;IL10;PTGIS;AHSG;IL15;CMA1;PDE2A;WNT5A;IL18;NR1H4;NMI;MMP9;MFHAS1;FNDC4;TNFSF4;IL1B;LPCAT3;AGTR1;DNASE1L3;TLR4;S100A9;S100A8;PTGES;PPARD
CvsSt	GO_Biological_Process_2021	modulation of chemical synaptic transmission (GO:0050804)	23/109	7.25516e-05	0.0217993	2.76718	26.3745	NLGN3;LGI1;PXK;CLSTN3;CAMK2A;LRRC4;GRIK4;CEL;CPLX2;TNF;CPLX1;CPLX3;RIMS2;SLC4A8;GRM4;DLG4;IL1B;NMU;NPTX1;LRRC4C;NPTX2;DLGAP3;DGKI
CvsSt	GO_Biological_Process_2021	negative chemotaxis (GO:0050919)	11/33	8.0547e-05	0.0222259	5.15637	48.6074	SEMA4A;ITGB3;LRTM2;SEMA6D;LRTM1;SEMA3B;SLIT1;SEMA4F;SEMA3F;LGR6;ROBO1
CvsSt	GO_Biological_Process_2021	regulation of cation channel activity (GO:2001257)	20/89	8.38341e-05	0.0222259	2.99676	28.1296	CAMK2B;GRIA1;PRRT1;GRIA2;KCNE1;ACTN2;DAPK1;CAMK2A;OPRM1;JPH1;MMP9;SHISA7;CRHBP;CACNG8;DLG2;NETO1;KCNS1;DLG4;CRH;NEFL
CvsSt	GO_Biological_Process_2021	positive regulation of cell differentiation (GO:0045597)	42/258	8.89774e-05	0.022279	2.01935	18.8348	RIPOR2;DLX2;TGFB1I1;LEF1;ADIRF;LRP3;LOXL2;GJA1;SULT1E1;GLIPR2;MDK;GPC1;KDR;NRCAM;SOX6;ZNF385A;CDON;BEND6;SERPINB3;ZHX3;EDN3;IL18;MMD2;AXIN2;ALOX15B;FOXN1;ADRA2B;RUNX2;COL1A1;BMP4;HEYL;OLFM1;KITLG;BAMBI;IL1B;PLA2G10;AGTR1;KCTD11;ASB4;PPARD;FGFR1;LTF
CvsSt	GO_Biological_Process_2021	diterpenoid metabolic process (GO:0016101)	16/64	0.000111411	0.0264278	3.44242	31.3339	LRP1;APOA4;HSPG2;PLB1;RLBP1;RBP2;RDH12;AWAT2;GPC1;ALDH1A1;RBP1;RDH5;LRAT;APOE;BCO2;STRA6
CvsSt	GO_Biological_Process_2021	regulation of endothelial cell proliferation (GO:0001936)	20/92	0.00013641	0.0307399	2.87142	25.5552	SEMA5A;NRP2;EGFL7;CCL11;EGR3;CAV2;ITGB3;TNFSF12;WNT5A;VEGFD;VASH1;NR2F2;SULF1;THBS4;BMP4;ALOX5;ATOH8;KDR;APOE;XDH
CvsSt	GO_Biological_Process_2021	potassium ion transport (GO:0006813)	24/122	0.000162443	0.0348633	2.53369	22.1069	KCNH2;KCNG2;KCNK6;HCN3;KCNE1;SLC24A4;KCND1;KCNJ10;KCNK9;KCNJ11;KCNJ13;KCNA7;SLC9C1;NALCN;SLC9A2;SLC9A5;KCNS1;KCNS3;KCNQ4;KCNN4;KCNK2;HCN2;KCNK3;HCN1
CvsSt	GO_Biological_Process_2021	calcium ion transport (GO:0006816)	23/115	0.000170478	0.0349248	2.58585	22.4372	CCR1;SLC24A4;CHRNA4;CAMK2A;TRPV2;TRPV3;SLC3A2;CACNA1C;CACNA1F;NALCN;RYR3;TRPM1;CACNA1I;CRACR2A;CACNG8;CRACR2B;TRPV5;FYN;CACNA1S;KCNN4;TRPM6;RAMP1;SLC24A5
CvsSt	GO_Biological_Process_2021	cellular response to metal ion (GO:0071248)	25/131	0.000197748	0.03875	2.44038	20.8129	PRKAA2;CPNE5;ALOX15;ADCY1;RYR3;CRHBP;CHP2;PLCG2;SLC13A5;B2M;WNT5A;MT4;MT3;MMP9;SYT7;SYT6;SYT17;TF;DLG2;SYT12;DLG4;RASA4;ALOX5AP;MT1G;ATP13A2
CvsSt	GO_Biological_Process_2021	potassium ion transmembrane transport (GO:0071805)	26/139	0.000208373	0.0391307	2.38122	20.1836	KCNG2;KCNK6;HCN3;KCNE1;SLC24A4;KCNK9;KCNE4;KCNA7;SLC9C1;NALCN;KCNN4;KCNH2;KCND1;KCNJ10;KCNJ11;KCNJ13;ATP1B2;SLC9A2;SLC9A5;KCNS1;KCNS3;KCNQ4;KCNK2;HCN2;KCNK3;HCN1
CvsSt	GO_Biological_Process_2021	melanocyte differentiation (GO:0030318)	6/12	0.000280588	0.0432615	10.2927	84.1797	USP13;MREG;CITED1;KIT;TYRP1;SLC24A5
CvsSt	GO_Biological_Process_2021	histone citrullination (GO:0036414)	4/5	0.000287962	0.0432615	41.1354	335.364	PADI3;PADI2;PADI4;PADI1
CvsSt	GO_Biological_Process_2021	inosine metabolic process (GO:0046102)	4/5	0.000287962	0.0432615	41.1354	335.364	ADAL;PNP;XDH;ADA
CvsSt	GO_Biological_Process_2021	melanin biosynthetic process (GO:0042438)	4/5	0.000287962	0.0432615	41.1354	335.364	CITED1;DCT;TYRP1;TYR
CvsSt	GO_Biological_Process_2021	positive regulation of neutrophil extravasation (GO:2000391)	4/5	0.000287962	0.0432615	41.1354	335.364	RIPOR2;MDK;ADAM8;XG
CvsSt	GO_Biological_Process_2021	protein citrullination (GO:0018101)	4/5	0.000287962	0.0432615	41.1354	335.364	PADI3;PADI2;PADI4;PADI1
CvsSt	GO_Biological_Process_2021	negative regulation of multicellular organismal process (GO:0051241)	35/214	0.000301921	0.0438954	2.02662	16.4265	DLX2;STC1;TNF;PTPRG;ROBO1;LOXL2;CRHBP;SPRED2;GJA1;SHH;WNT11;GPNMB;MDK;HEY2;ARHGDIB;ZNF423;RAB11FIP5;IL10;SRGN;WNT10B;IL15;GDF15;NOS3;PTCH1;NR1H4;TRPV3;APOA4;VASN;SMAD7;BMP4;PROCR;IL1B;ALDH1A1;FCGR2B;TLR4
CvsSt	GO_Biological_Process_2021	positive regulation of endothelial cell proliferation (GO:0001938)	17/77	0.000348185	0.0490396	2.92579	23.2974	SEMA5A;NRP2;EGFL7;CCL11;EGR3;ITGA4;ITGB3;TNFSF12;WNT5A;VEGFD;GATA2;THBS4;BMP4;MDK;KDR;AGTR1;FGFR1
CvsSt	GO_Biological_Process_2021	retinoid metabolic process (GO:0001523)	19/92	0.000397836	0.0543347	2.68881	21.0519	LRP1;APOA4;HSPG2;PLB1;RLBP1;ALDH1A3;CYP26B1;RBP2;RDH12;CYP2D6;AWAT2;GPC1;ALDH1A1;RBP1;RDH5;LRAT;APOE;BCO2;STRA6
CvsSt	GO_Biological_Process_2021	regulation of response to stress (GO:0080134)	6/13	0.000481965	0.06288	8.82179	67.3777	IL10;CRHBP;OPRM1;CORO2B;STOX1;EIF4G1
CvsSt	GO_Biological_Process_2021	neutral amino acid transport (GO:0015804)	9/28	0.000488307	0.06288	4.88026	37.2099	SLC7A5;SLC6A7;SLC6A17;SLC7A8;SLC7A9;CTNS;SLC3A2;SLC1A5;SLC38A3
CvsSt	GO_Biological_Process_2021	sodium ion transmembrane transport (GO:0035725)	18/87	0.000546769	0.0655403	2.69402	20.2361	HCN3;SLC6A19;SLC24A4;SLC6A17;SLC6A12;ATP1B2;SLC9C1;NALCN;SLC9A2;SCNN1G;SLC4A8;SLC6A7;SLC9A5;SCN4A;ASIC2;SCN4B;HCN2;HCN1
CvsSt	GO_Biological_Process_2021	positive regulation of cell death (GO:0010942)	15/66	0.000549781	0.0655403	3.03521	22.7822	C1QA;EGR1;LRP1;WNT5A;AXIN2;TNF;MT3;BMP4;SLFN11;TYROBP;APC;FYN;MARK4;FCGR2B;EIF4G1
CvsSt	GO_Biological_Process_2021	triglyceride catabolic process (GO:0019433)	8/23	0.000552592	0.0655403	5.49291	41.2017	FABP3;FABP4;FABP5;FABP6;FABP7;LIPH;FABP9;PNPLA1
CvsSt	GO_Biological_Process_2021	positive regulation of cell projection organization (GO:0031346)	22/117	0.000574783	0.0661497	2.39355	17.8596	CAMK2B;NDRG4;PLK5;CAMK1D;FBXW8;AMIGO1;WNT5A;ATP1B2;ROBO1;PTPRD;CUX2;DLG4;PTK7;MDK;DPYSL3;DVL2;MAP6;ROR1;ALKAL2;APOE;TOX;S100A9
CvsSt	GO_Biological_Process_2021	inflammatory response (GO:0006954)	36/230	0.000587084	0.0661497	1.92286	14.3067	PXK;CCL11;CXCL8;GPR68;C5AR2;ALOX15;C5AR1;LY75;ADCY1;TNF;CRHBP;SCUBE1;ADORA1;CCL2;CCR1;GGT5;CCL23;XCR1;CCL22;IL18;CYBB;HSPG2;NFATC4;CXCL10;MFHAS1;TNFSF4;IL1B;KIT;AGTR1;CRH;NOX4;ADAM8;FCGR2B;TLR4;S100A9;S100A8
CvsSt	GO_Biological_Process_2021	cellular protein modification process (GO:0006464)	121/1025	0.000683379	0.0751217	1.40077	10.2095	GMFG;CCNF;LOXL1;LOXL2;LIPE;PPP2R1B;CDK20;NEK2;TGM7;TGM6;MAP3K6;TGM3;FBXW8;DAPK1;PRKCB;IGFBP4;PRKCE;LMTK3;VRK1;CEL;ERN1;MELK;PRKAR1B;PADI4;SIK2;PPEF2;FLG;PXK;DAPP1;KNG1;C3;STK36;STC2;ST8SIA4;ST8SIA5;ST3GAL5;ST3GAL6;APOE;PI3;MARK4;ST3GAL1;WDTC1;MARK1;PRRT1;CDK18;ST8SIA1;ST8SIA2;PLK2;AMBN;PMM2;TMEM132A;PARP14;MT3;PTPRD;BMP4;PTPRE;BPIFB2;TF;PTPRC;CDK6;ALB;AAK1;CDK15;FBN1;FGFR1;PTPRK;MSLN;TRIOBP;PTPRG…
CvsSt	GO_Biological_Process_2021	collagen fibril organization (GO:0030199)	18/89	0.000726736	0.0753832	2.61784	18.919	COL28A1;COL15A1;COL16A1;COL27A1;COL14A1;COL11A2;P3H4;LOXL1;COL19A1;LOXL2;COL1A1;BMP1;COL6A2;P4HA3;COL6A1;COL10A1;COL6A3;TLL2
CvsSt	GO_Biological_Process_2021	canonical Wnt signaling pathway (GO:0060070)	15/68	0.000767823	0.0753832	2.92035	20.9446	WNT10B;WNT10A;WNT5A;LEF1;TCF7;WNT8B;FZD10;LRP6;WNT6;BCL9;CDH3;WNT11;APC;DVL2;WNT3
CvsSt	GO_Biological_Process_2021	leucine transport (GO:0015820)	4/6	0.000802839	0.0753832	20.5666	146.585	SLC7A5;SLC6A17;SLC7A8;SLC3A2
CvsSt	GO_Biological_Process_2021	negative regulation of cardiac muscle cell apoptotic process (GO:0010667)	4/6	0.000802839	0.0753832	20.5666	146.585	MDK;PPP1R10;GATA4;NUPR1
CvsSt	GO_Biological_Process_2021	negative regulation of morphogenesis of an epithelium (GO:1905331)	4/6	0.000802839	0.0753832	20.5666	146.585	BMP4;SULF1;TNF;NKD1
CvsSt	GO_Biological_Process_2021	purine ribonucleoside catabolic process (GO:0046130)	4/6	0.000802839	0.0753832	20.5666	146.585	ADAL;PNP;XDH;ADA
CvsSt	GO_Biological_Process_2021	regulation of neutrophil extravasation (GO:2000389)	4/6	0.000802839	0.0753832	20.5666	146.585	RIPOR2;MDK;ADAM8;XG
CvsSt	GO_Biological_Process_2021	positive regulation of epithelial to mesenchymal transition (GO:0010718)	11/42	0.000845068	0.0766908	3.65755	25.8812	SERPINB3;COL1A1;OLFM1;GLIPR2;MDK;BAMBI;TGFB1I1;IL1B;LEF1;AXIN2;LOXL2
CvsSt	GO_Biological_Process_2021	protein localization to plasma membrane (GO:0072659)	24/136	0.000858562	0.0766908	2.21526	15.6403	TRARG1;C2CD5;PLEKHF1;ACTN2;PTCH1;TESC;KCNIP3;TTC7B;EMP2;TNF;ANK1;TSPAN33;EFR3B;LRP6;NKD2;TSPAN15;EHD3;EHD4;RAB15;EPB41L3;TSPAN5;NECTIN3;RAMP1;EPHA2
CvsSt	GO_Biological_Process_2021	cyclic-nucleotide-mediated signaling (GO:0019935)	10/36	0.000877454	0.0766908	3.96332	27.8958	GLP1R;RIMS2;GAL;PDE2A;IRAG1;PDE3A;ADCY2;ADCY1;APOE;PDE7B
CvsSt	GO_Biological_Process_2021	cell chemotaxis (GO:0060326)	15/69	0.000901844	0.0766908	2.86611	20.0945	SEMA5A;CCR1;EGR3;XCR1;LEF1;CXCR6;BIN2;KIT;CCR9;AGTR1;ACKR4;ACKR2;CCR4;EPHA2;HBEGF
CvsSt	GO_Biological_Process_2021	cellular response to calcium ion (GO:0071277)	15/69	0.000901844	0.0766908	2.86611	20.0945	PRKAA2;CPNE5;WNT5A;ALOX15;ADCY1;RYR3;SYT7;SYT17;SYT6;CRHBP;SYT12;RASA4;ALOX5AP;CHP2;PLCG2
CvsSt	GO_Biological_Process_2021	supramolecular fiber organization (GO:0097435)	49/351	0.00102101	0.0835369	1.68377	11.5961	CEP126;COL16A1;COL14A1;KIF14;LMOD1;TRIOBP;LOXL1;LOXL2;LMOD2;COL10A1;NEFL;B2M;KRT71;COL27A1;SHROOM2;P3H4;EMP2;APOA4;MYO7A;RHOC;HSPG2;CLIP2;COL6A2;COL6A1;CDC42EP2;COL6A3;KIF2C;LTF;COL15A1;COL11A2;TSPAN33;COL19A1;KASH5;TSPAN5;COL28A1;PLK3;CCDC13;KLHL24;ARHGAP25;COL1A1;MFAP4;TSPAN15;BFSP1;BMP1;ACTC1;P4HA3;CCDC88C;MYO5C;TLL2
CvsSt	GO_Biological_Process_2021	cAMP-mediated signaling (GO:0019933)	8/25	0.00103796	0.0835369	4.84615	33.2955	GLP1R;RIMS2;GAL;PDE2A;PDE3A;ADCY2;ADCY1;PDE7B
CvsSt	GO_Biological_Process_2021	regulation of neutrophil chemotaxis (GO:0090022)	8/25	0.00103796	0.0835369	4.84615	33.2955	DPP4;RIPOR2;CXCL8;CAMK1D;MDK;C5AR2;THBS4;JAM3
CvsSt	GO_Biological_Process_2021	Wnt signaling pathway (GO:0016055)	18/92	0.00109087	0.086091	2.5113	17.129	WNT10B;WNT10A;ZRANB1;WNT5A;LEF1;TCF7;WNT8B;FZD10;LRP6;WNT6;BCL9;WNT11;APC;CCDC88C;DVL2;PLCG2;WNT3;WLS
CvsSt	GO_Biological_Process_2021	negative regulation of G1/S transition of mitotic cell cycle (GO:2000134)	10/37	0.00110789	0.086091	3.81632	25.9712	PLK3;CDKN2C;PLK5;CDK6;SLFN11;GPNMB;APC;CCL2;E2F7;MYO16
CvsSt	GO_Biological_Process_2021	lipopolysaccharide-mediated signaling pathway (GO:0031663)	7/20	0.00118174	0.0887685	5.5432	37.3654	PRKCE;IL1B;IL18;CCL2;BPI;TNF;TLR4
CvsSt	GO_Biological_Process_2021	toll-like receptor 4 signaling pathway (GO:0034142)	7/20	0.00118174	0.0887685	5.5432	37.3654	OAS1;PRKCE;TNIP3;NR1H4;LY96;NMI;TLR4
CvsSt	GO_Biological_Process_2021	carboxylic acid transport (GO:0046942)	13/57	0.00121814	0.0900029	3.04672	20.4448	SLC6A17;SLC23A1;SLC6A12;SLC3A2;SLC1A5;SLC16A13;SLC7A5;SLC6A7;SLC7A8;SLC16A6;SLC17A1;SLC38A3;SLC16A5
CvsSt	GO_Biological_Process_2021	cation transmembrane transport (GO:0098655)	11/44	0.00128384	0.093327	3.43551	22.8732	TRPM1;SLC7A5;KCNJ11;SLC7A8;SLC29A4;SLC3A2;ATP13A2;ASIC2;TRPM6;MFSD12;SLC7A2
CvsSt	GO_Biological_Process_2021	epithelial cell differentiation (GO:0030855)	19/101	0.00131563	0.09412	2.39251	15.8705	CPT1A;ACADVL;DLX3;CITED1;UPK2;DEUP1;OVOL1;BMP4;UPK1B;MAF;SCUBE1;MCIDAS;TST;ERBB4;KDR;RHCG;CCNO;E2F7;CES1
CvsSt	GO_Biological_Process_2021	negative regulation of cell development (GO:0010721)	8/26	0.00138371	0.0946106	4.57667	30.1282	CCL11;IL1B;RFLNB;TNF;B2M;RFLNA;FBN1;LTF
CvsSt	GO_Biological_Process_2021	positive regulation of interleukin-2 production (GO:0032743)	8/26	0.00138371	0.0946106	4.57667	30.1282	CD4;PNP;PTPRC;IRF4;IL1B;PDE4B;PLCG2;CARD11
CvsSt	GO_Biological_Process_2021	response to cAMP (GO:0051591)	10/38	0.00138547	0.0946106	3.67983	24.2196	HCN3;CRHBP;KCNE1;CITED1;VGF;PDE2A;SLC26A3;CFTR;HCN2;HCN1
CvsSt	GO_Biological_Process_2021	long-chain fatty acid transport (GO:0015909)	9/32	0.00143299	0.0963956	4.03063	26.3925	SLC27A1;CPT1A;FABP3;PRKAA2;FABP4;FABP5;APOE;ABCD1;ACACA
CvsSt	GO_Biological_Process_2021	skeletal system development (GO:0001501)	26/158	0.00155061	0.0991108	2.03633	13.1732	PTH;HHIP;DLX6;NCAN;COL11A2;STC1;PCSK5;COL19A1;PAPSS2;GJA1;WNT11;COL10A1;SOX6;GDF11;AHSG;WNT5A;RFLNB;EN1;BMP8B;SULF1;RFLNA;COL1A1;BMP1;NOTUM;FBN1;FGFR1
CvsSt	GO_Biological_Process_2021	neural crest cell development (GO:0014032)	11/45	0.00156486	0.0991108	3.33428	21.5393	SEMA5A;SEMA4A;SHH;ERBB4;SEMA6D;SEMA3B;NRTN;NRG1;SEMA4F;SEMA3F;KBTBD8
CvsSt	GO_Biological_Process_2021	positive regulation of cellular extravasation (GO:0002693)	5/11	0.00160639	0.0991108	8.57237	55.1526	RIPOR2;MDK;ADAM8;JAM3;XG
CvsSt	GO_Biological_Process_2021	positive regulation of interleukin-13 production (GO:0032736)	5/11	0.00160639	0.0991108	8.57237	55.1526	IRF4;SPHK2;TNFSF4;IL18;HLA-E
CvsSt	GO_Biological_Process_2021	regulation of cardiac muscle cell apoptotic process (GO:0010665)	5/11	0.00160639	0.0991108	8.57237	55.1526	MDK;PPP1R10;CAMK2A;GATA4;NUPR1
CvsSt	GO_Biological_Process_2021	linoleic acid metabolic process (GO:0043651)	7/21	0.00163789	0.0991108	5.14698	33.0145	FADS2;ALOX5;ALOX15;ELOVL3;ALOX15B;ABCD1;FADS1
CvsSt	GO_Biological_Process_2021	response to molecule of bacterial origin (GO:0002237)	15/73	0.00165261	0.0991108	2.66786	17.0887	IL10;GGT5;CXCL8;CITED1;NOS3;PALM3;LY96;SLPI;IL1B;GGT1;FCGR2B;S100A9;TLR4;S100A8;IFNAR1
CvsSt	GO_Biological_Process_2021	ameboidal-type cell migration (GO:0001667)	12/52	0.00166607	0.0991108	3.09252	19.7837	SEMA5A;SEMA4A;SHH;ITGA4;ERBB4;SEMA6D;SEMA3B;NRTN;SEMA4F;SEMA3F;SRGAP2;CER1
CvsSt	GO_Biological_Process_2021	angiotensin-activated signaling pathway (GO:0038166)	4/7	0.00174133	0.0991108	13.7103	87.103	ACTN2;CA2;CAMK2A;AGTR1
CvsSt	GO_Biological_Process_2021	atrioventricular valve formation (GO:0003190)	4/7	0.00174133	0.0991108	13.7103	87.103	OLFM1;DCHS1;GATA4;ZFPM1
CvsSt	GO_Biological_Process_2021	lipoxin biosynthetic process (GO:2001301)	4/7	0.00174133	0.0991108	13.7103	87.103	ALOX5;ALOX15;ALOX5AP;ALOX15B
CvsSt	GO_Biological_Process_2021	vitamin A metabolic process (GO:0006776)	4/7	0.00174133	0.0991108	13.7103	87.103	RBP2;RBP1;LRAT;RLBP1
CvsSt	GO_Biological_Process_2021	glycosphingolipid biosynthetic process (GO:0006688)	6/16	0.00178122	0.0991108	6.17424	39.0857	ST8SIA1;ST8SIA2;ST8SIA4;ST3GAL5;ST8SIA5;ST6GALNAC3
CvsSt	GO_Biological_Process_2021	regulation of interleukin-13 production (GO:0032656)	6/16	0.00178122	0.0991108	6.17424	39.0857	SPHK2;IRF4;TNFSF4;LEF1;IL18;HLA-E
CvsSt	GO_Biological_Process_2021	generation of neurons (GO:0048699)	31/202	0.00187278	0.102935	1.87551	11.7788	WNT8B;FZD10;CELSR1;VXN;WNT6;SHH;WNT11;HEY2;ATOH8;SPOCK1;NRCAM;WNT3;MARK1;HES6;WNT10B;EMX1;WNT10A;WNT5A;EN1;NAV1;CCK;RUNX2;PTPRD;HEYL;CDK6;LMX1A;IL1B;LHX6;ASTN2;ASTN1;FGFR1
CvsSt	GO_Biological_Process_2021	positive regulation of inflammatory response (GO:0050729)	17/89	0.0019447	0.1056	2.43655	15.2105	IL15;WNT5A;PDE2A;IL18;NMI;TNF;PLA2G7;MDK;IL1B;TNFSF4;AGTR1;S100A12;ADAM8;NUPR1;S100A9;TLR4;S100A8
CvsSt	GO_Biological_Process_2021	regulation of angiogenesis (GO:0045765)	31/203	0.00202682	0.108203	1.8645	11.5623	SEMA5A;SP100;CXCL8;GATA4;KLK3;ISM1;GATA2;PIK3R6;HK2;THBS4;CDH5;GPNMB;ALOX5;KDR;CTSH;PTGIS;PRKCB;NOS3;SERPINF1;TNFSF12;WNT5A;EMP2;VEGFD;VASH1;SULF1;HSPG2;CXCL10;IL1B;ADGRB1;ADAM12;EPHA2
CvsSt	GO_Biological_Process_2021	regulation of MAP kinase activity (GO:0043405)	18/97	0.00204066	0.108203	2.35171	14.5676	EDN3;DIRAS1;IL34;DIRAS2;SPRY4;TNF;PIK3R6;PIK3R5;ROBO1;BMP4;UCHL1;IL1B;KIT;S100A12;ADAM8;APOE;PPEF2;FGFR1
CvsSt	GO_Biological_Process_2021	negative regulation of inflammatory response (GO:0050728)	32/212	0.00209656	0.109414	1.83935	11.3441	GLP1R;VIPR1;PTH;ADCY2;RORA;GPR83;ADCY1;C1QTNF3;CDH5;MDK;PRKACG;ALOX5;PLCG2;FYN;APOE;ENPP3;GGT1;IL10;GGT5;GPR15;PTGIS;PLK2;NR1H4;SCTR;PTH2R;MFHAS1;FNDC4;PRKAR1B;LPCAT3;CRH;RAMP1;PPARD
CvsSt	GO_Biological_Process_2021	protein localization to membrane (GO:0072657)	30/195	0.00211205	0.109414	1.88056	11.5844	TRARG1;C2CD5;PLEKHF1;LRRC4;TNF;SYNE3;TSPAN33;NKD2;LRP6;EPB41L3;TSPAN5;ITGA4;ACTN2;TESC;PTCH1;KCNIP3;RFTN1;TTC7B;EMP2;ANK1;EFR3B;TSPAN15;EHD3;EHD4;DLG2;NPC1;DLG4;RAB15;RAMP1;EPHA2
CvsSt	GO_Biological_Process_2021	sulfur compound biosynthetic process (GO:0044272)	20/113	0.00214866	0.110045	2.22047	13.6401	GGT5;MPST;CHST7;TPK1;NCAN;OMD;PAPSS2;HPGDS;CHST11;CTH;CHST15;CHST1;ST3GAL6;CHAC1;HAGH;GGT1;ST3GAL1;CHST5;B4GALT4;CHST2
CvsSt	GO_Biological_Process_2021	sodium ion transport (GO:0006814)	17/90	0.00220328	0.110263	2.40304	14.7013	HCN3;SLC6A19;SLC24A4;SLC6A17;SLC23A1;SLC6A12;NALCN;SLC9B2;SCNN1G;SLC4A8;SLC6A7;SLC5A9;SCN4A;ASIC2;SCN4B;HCN2;HCN1
CvsSt	GO_Biological_Process_2021	positive regulation of neutrophil migration (GO:1902624)	7/22	0.00221996	0.110263	4.80358	29.3511	RIPOR2;CAMK1D;CXCL8;MDK;ADAM8;THBS4;XG
CvsSt	GO_Biological_Process_2021	positive regulation of MAPK cascade (GO:0043410)	39/274	0.00222629	0.110263	1.71872	10.4969	NDRG4;CCL11;DIRAS1;DIRAS2;ALOX15;C5AR1;GATA4;TNF;PIK3R6;PIK3R5;ROBO1;GRM4;GPNMB;GLIPR2;ERBB4;KDR;PLCG2;S100A12;CCL2;ALKAL2;APOE;CCR1;CCL23;CCL22;EDN3;GDF15;CAV2;IL34;OPRM1;MT3;ADRA2B;MARCO;MFHAS1;CD4;PTPRC;KIT;ADAM8;ROR1;FGFR1
CvsSt	GO_Biological_Process_2021	positive regulation of defense response (GO:0031349)	18/98	0.00229669	0.112513	2.32218	14.1103	LRSAM1;IL15;WNT5A;PDE2A;IL18;NMI;TNF;PLA2G7;PLSCR1;MDK;TNFSF4;IL1B;AGTR1;S100A12;ADAM8;S100A9;TLR4;S100A8
CvsSt	GO_Biological_Process_2021	positive regulation of cell communication (GO:0010647)	8/28	0.00234565	0.113676	4.11855	24.9386	RIMS2;LGI1;EDN3;CLSTN3;DLG4;NMU;TNF;WLS
CvsSt	GO_Biological_Process_2021	regulation of epithelial to mesenchymal transition (GO:0010717)	15/76	0.00250953	0.119503	2.53624	15.1861	SERPINB3;TGFB1I1;LEF1;AXIN2;VASN;LOXL2;SMAD7;COL1A1;SPRED2;OLFM1;GLIPR2;MDK;BAMBI;IL1B;PHLDB2
CvsSt	GO_Biological_Process_2021	pulmonary valve morphogenesis (GO:0003184)	6/17	0.00254766	0.119503	5.61263	33.5219	BMP4;HEYL;NOS3;HEY2;ROBO1;STRA6
CvsSt	GO_Biological_Process_2021	pyrimidine nucleobase metabolic process (GO:0006206)	5/12	0.0025534	0.119503	7.34734	43.866	CDA;DPYSL4;DPYSL2;DPYSL3;CTPS1
CvsSt	GO_Biological_Process_2021	carboxylic acid transmembrane transport (GO:1905039)	10/41	0.00257195	0.119503	3.32317	19.8163	SLC13A2;SLC7A5;SLC27A1;SLC7A8;SLC7A9;SLC23A1;SLC7A13;SLC38A11;SLC7A11;SLC38A3
CvsSt	GO_Biological_Process_2021	positive regulation of MAP kinase activity (GO:0043406)	14/69	0.0026357	0.121215	2.62477	15.5874	EDN3;DIRAS1;IL34;DIRAS2;FZD10;TNF;PIK3R6;ROBO1;PIK3R5;KIT;DVL2;S100A12;ADAM8;FGFR1
CvsSt	GO_Biological_Process_2021	glycoprotein metabolic process (GO:0009100)	12/55	0.00276346	0.124549	2.87629	16.945	NEU2;MANBA;GOLPH3;ADAMTS13;ST8SIA1;ST8SIA2;GCNT1;ST8SIA4;ST8SIA5;HPSE;ST6GALNAC3;ENGASE
CvsSt	GO_Biological_Process_2021	triglyceride metabolic process (GO:0006641)	12/55	0.00276346	0.124549	2.87629	16.945	FABP3;LPGAT1;FABP4;FABP5;MOGAT2;FABP6;LIPH;FABP7;FABP9;APOE;LPIN3;PNPLA1
CvsSt	GO_Biological_Process_2021	T cell activation (GO:0042110)	17/92	0.00280712	0.125264	2.3387	13.7413	LMBR1L;CRTAM;CTPS1;IFNW1;DPP4;CD2;PPP3CA;CD4;PTPRC;CD8B;MDK;IRF4;IFNE;TNFSF4;KIT;LCP1;ADA
CvsSt	GO_Biological_Process_2021	protein localization to cell periphery (GO:1990778)	23/140	0.00286492	0.12659	2.03052	11.8891	TRARG1;C2CD5;PLEKHF1;ACTN2;PTCH1;TESC;KCNIP3;TTC7B;EMP2;TNF;ANK1;TSPAN33;EFR3B;LRP6;NKD2;TSPAN15;EHD3;EHD4;RAB15;EPB41L3;TSPAN5;RAMP1;EPHA2
CvsSt	GO_Biological_Process_2021	regulation of neuronal synaptic plasticity (GO:0048168)	8/29	0.00299057	0.130859	3.92222	22.7971	CAMK2B;NETO1;DLG4;CAMK2A;APOE;NCDN;EPHB2;SHISA7
CvsSt	GO_Biological_Process_2021	negative regulation of defense response (GO:0031348)	16/85	0.00303768	0.131643	2.39196	13.8654	IL10;MAPKBP1;PTGIS;NR1H4;RORA;NMI;C1QTNF3;CDH5;MFHAS1;FNDC4;ALOX5;LPCAT3;DHX58;ENPP3;APOE;PPARD
CvsSt	GO_Biological_Process_2021	axon extension involved in axon guidance (GO:0048846)	4/8	0.00323814	0.132675	10.2822	58.9452	NRP2;ALCAM;SLIT1;SEMA3F
CvsSt	GO_Biological_Process_2021	cysteine metabolic process (GO:0006534)	4/8	0.00323814	0.132675	10.2822	58.9452	MPST;TST;CTH;GGT1
CvsSt	GO_Biological_Process_2021	negative regulation of striated muscle cell apoptotic process (GO:0010664)	4/8	0.00323814	0.132675	10.2822	58.9452	MDK;PPP1R10;GATA4;NUPR1
CvsSt	GO_Biological_Process_2021	neuron projection extension involved in neuron projection guidance (GO:1902284)	4/8	0.00323814	0.132675	10.2822	58.9452	NRP2;ALCAM;SLIT1;SEMA3F
CvsSt	GO_Biological_Process_2021	purine ribonucleoside monophosphate catabolic process (GO:0009169)	4/8	0.00323814	0.132675	10.2822	58.9452	NT5E;PNP;AMPD3;XDH
CvsSt	GO_Biological_Process_2021	vascular associated smooth muscle contraction (GO:0014829)	4/8	0.00323814	0.132675	10.2822	58.9452	ACTA2;EDNRA;EDNRB;EDN3
CvsSt	GO_Biological_Process_2021	fatty acid biosynthetic process (GO:0006633)	14/71	0.00347321	0.141025	2.53239	14.3401	OLAH;ACOT7;ASAH2;ABHD2;ELOVL3;ALOX15;ACSM5;ACACA;CYP2D6;LIPH;ALOX5;CYP2E1;ABCD1;FADS1
CvsSt	GO_Biological_Process_2021	pulmonary valve development (GO:0003177)	6/18	0.00353727	0.142344	5.14463	29.0384	BMP4;HEYL;NOS3;HEY2;ROBO1;STRA6
CvsSt	GO_Biological_Process_2021	regulation of ion transport (GO:0043269)	15/79	0.0037047	0.145499	2.41695	13.5305	PXK;KCNJ10;KCNJ11;CHRNA4;ITGB3;KCNJ13;STC1;SYT7;SYT17;SYT6;CLDN10;TF;SYT12;CA2;B2M
CvsSt	GO_Biological_Process_2021	cellular response to retinoic acid (GO:0071300)	10/43	0.00373766	0.145499	3.12142	17.4465	WNT6;WNT10B;WNT11;PTK7;TESC;WNT5A;WNT8B;FZD10;RORB;WNT3
CvsSt	GO_Biological_Process_2021	long-chain fatty acid biosynthetic process (GO:0042759)	8/30	0.00376544	0.145499	3.74373	20.8971	ASAH2;ACOT7;CYP2D6;ALOX5;ALOX15;CYP2E1;ALOX15B;FADS1
CvsSt	GO_Biological_Process_2021	arachidonic acid metabolic process (GO:0019369)	12/57	0.0037771	0.145499	2.74815	15.3314	FAAH;HPGDS;DAGLA;PTGIS;CYP2D6;ALOX5;PLA2G10;ALOX15;CYP2E1;CYP2F1;ALOX15B;PTGES
CvsSt	GO_Biological_Process_2021	icosanoid metabolic process (GO:0006690)	12/57	0.0037771	0.145499	2.74815	15.3314	GGT5;FAAH;DAGLA;PTGIS;CYP2D6;ALOX5;PLA2G10;ALOX15;ALOX5AP;GGT1;ALOX15B;FADS1
CvsSt	GO_Biological_Process_2021	high-density lipoprotein particle assembly (GO:0034380)	5/13	0.00384805	0.145776	6.42857	35.7441	BMP1;PRKACG;APOA4;ZDHHC8;APOE
CvsSt	GO_Biological_Process_2021	protein kinase B signaling (GO:0043491)	7/24	0.00384899	0.145776	4.23799	23.563	PLK3;IL1B;KDR;CCL2;MT3;TNF;EPHA2
CvsSt	GO_Biological_Process_2021	negative regulation of epithelial cell proliferation (GO:0050680)	14/72	0.00396684	0.148988	2.48859	13.7614	CAV2;PTPRK;VASH1;NR2F2;SULF1;ROBO1;CDK6;ALOX5;ATOH8;KLF9;NUPR1;APOE;B2M;XDH
CvsSt	GO_Biological_Process_2021	negative regulation of immune response (GO:0050777)	27/178	0.00417034	0.15425	1.84768	10.1249	GLP1R;MAPKBP1;VIPR1;PTH;ALOX15;GPR83;ADCY2;ADCY1;PRKACG;DHX58;PLCG2;FYN;ENPP3;GGT1;GGT5;IL10;GPR15;AMBP;PLK2;SCTR;RC3H1;PTH2R;NMI;PRKAR1B;CRH;FCGR2B;RAMP1
CvsSt	GO_Biological_Process_2021	negative regulation of endothelial cell proliferation (GO:0001937)	9/37	0.00424383	0.15425	3.30997	18.08	CAV2;ALOX5;ATOH8;CCL2;APOE;NR2F2;VASH1;SULF1;XDH
CvsSt	GO_Biological_Process_2021	neural crest cell migration (GO:0001755)	9/37	0.00424383	0.15425	3.30997	18.08	SEMA5A;SEMA4A;SHH;ERBB4;SEMA6D;SEMA3B;NRTN;SEMA4F;SEMA3F
CvsSt	GO_Biological_Process_2021	regulation of intracellular pH (GO:0051453)	9/37	0.00424383	0.15425	3.30997	18.08	SLC9A2;SLC4A8;SLC4A9;SLC9A5;CA2;SLC4A1;SLC9C1;SLC26A3;CFTR
CvsSt	GO_Biological_Process_2021	metal ion transport (GO:0030001)	16/88	0.00434414	0.155826	2.29192	12.4656	CCR1;CHRNA4;CAMK2A;SLC30A1;SLC3A2;CACNA1C;CACNA1F;MT3;RYR3;CACNG8;NIPAL3;TRPV5;FYN;CACNA1S;KCNN4;RAMP1
CvsSt	GO_Biological_Process_2021	cell-cell adhesion via plasma-membrane adhesion molecules (GO:0098742)	26/170	0.00435634	0.155826	1.8654	10.1405	CD84;TENM2;AMIGO1;LRRC4;NEXN;IGSF9;MYPN;ROBO1;CDH5;CDH4;ALCAM;CDH3;CDH24;EMB;LRRC4C;CD177;KIRREL3;CRTAM;IGFN1;IGSF11;PTPRD;CLDN10;CLDN14;DCHS1;CLDN17;NECTIN3
CvsSt	GO_Biological_Process_2021	antibacterial humoral response (GO:0019731)	10/44	0.00445937	0.158255	3.02945	16.3976	WFDC12;TF;SLPI;PI3;WFDC5;WFDC2;CAMP;WFDC3;HLA-E;LTF
CvsSt	GO_Biological_Process_2021	positive regulation of synaptic transmission (GO:0050806)	14/73	0.00451598	0.159012	2.44628	13.2102	NLGN3;LGI1;CLSTN3;PLK2;ADCY1;TNF;SHISA7;NFATC4;RIMS2;CACNG8;DLG4;NMU;CCL2;EPHB2
CvsSt	GO_Biological_Process_2021	cellular response to cAMP (GO:0071320)	8/31	0.00468666	0.161392	3.58076	19.2037	HCN3;CRHBP;KCNE1;PDE2A;SLC26A3;CFTR;HCN2;HCN1
CvsSt	GO_Biological_Process_2021	triglyceride homeostasis (GO:0070328)	8/31	0.00468666	0.161392	3.58076	19.2037	C1QTNF3;GCKR;HNF4A;IL18;NR1H4;RORA;APOA4;APOE
CvsSt	GO_Biological_Process_2021	postsynaptic membrane organization (GO:0001941)	6/19	0.00478613	0.161392	4.74863	25.3673	NLGN3;DLG4;LRRC4;CEL;APOE;SHISA7
CvsSt	GO_Biological_Process_2021	regulation of neuroinflammatory response (GO:0150077)	6/19	0.00478613	0.161392	4.74863	25.3673	DAGLA;IL1B;IL18;NUPR1;MMP9;TNF
CvsSt	GO_Biological_Process_2021	embryonic organ development (GO:0048568)	13/66	0.00481611	0.161392	2.5281	13.4894	NDRG4;CXCL8;FOXE1;PCSK5;TNF;ALDH1A3;KITLG;HEY2;KIT;KDR;ZFPM1;NES;STRA6
CvsSt	GO_Biological_Process_2021	cellular response to interferon-gamma (GO:0071346)	20/121	0.00484532	0.161392	2.04369	10.8923	CAMK2B;SP100;CCL23;CCL11;CCL22;DAPK1;IFNGR2;WNT5A;CAMK2A;HLA-E;OAS1;IRF4;IRF1;HLA-DRA;CCL2;NCAM1;GBP2;B2M;TLR4;HLA-DQB1
CvsSt	GO_Biological_Process_2021	regulated exocytosis (GO:0045055)	27/180	0.00486485	0.161392	1.82333	9.71053	SNAP25;ITGB3;ENDOD1;CPLX2;CPLX1;KNG1;CPLX3;RIMS2;CRHBP;A2M;LY6G6F;RAB11FIP5;SRGN;VWF;ACTN2;AHSG;PCDH7;VEGFD;GTPBP2;SYT7;SYT6;F5;SYT17;TF;SYT12;ALB;PCYOX1L
CvsSt	GO_Biological_Process_2021	second-messenger-mediated signaling (GO:0019932)	16/89	0.00487004	0.161392	2.2604	12.0358	CCR1;CXCL8;DGKD;XCR1;EDN3;NOS3;CXCR6;EDNRB;DDAH2;CCR9;AGTR1;PLCG2;ACKR4;ACKR2;APOE;CCR4
CvsSt	GO_Biological_Process_2021	cardiac conduction system development (GO:0003161)	7/25	0.00494217	0.162587	4.00232	21.2521	BMP4;GJA1;MSX2;HEY2;GATA4;MSX1;MSC
CvsSt	GO_Biological_Process_2021	regulation of peptide hormone secretion (GO:0090276)	14/74	0.00512503	0.165179	2.40537	12.685	GLP1R;KCNG2;SNAP25;KCNJ11;RASL10B;CACNA1C;TNF;SYT7;DPP4;CRHBP;HNF4A;IL1B;ALOX5;KCNS3
CvsSt	GO_Biological_Process_2021	positive regulation of production of molecular mediator of immune response (GO:0002702)	9/38	0.00513091	0.165179	3.19566	16.849	IL10;SLC7A5;PTPRC;SPHK2;TNFSF4;WNT5A;MZB1;EPHB2;HLA-E
CvsSt	GO_Biological_Process_2021	positive regulation of signaling (GO:0023056)	9/38	0.00513091	0.165179	3.19566	16.849	RIMS2;LGI1;EDN3;CLSTN3;DLG4;NMU;TNF;BVES;WLS
CvsSt	GO_Biological_Process_2021	positive regulation of protein localization to cell periphery (GO:1904377)	11/52	0.00524331	0.166861	2.76395	14.5129	GPSM2;LRP1;CNPY4;PRKCE;AGR2;ZDHHC8;SORBS1;EPHB2;TNF;EPHA2;NKD2
CvsSt	GO_Biological_Process_2021	response to lipid (GO:0033993)	19/114	0.00541979	0.166861	2.06363	10.7674	GGT5;CITED1;GPX3;NOS3;PALM3;LY96;WNT8B;APOA4;CYP24A1;SLPI;IL1B;CTSH;GGT1;S100A9;TLR4;ABCG1;S100A8;IFNAR1;PPARD
CvsSt	GO_Biological_Process_2021	adenosine metabolic process (GO:0046085)	4/9	0.00542077	0.166861	8.22528	42.9156	ADAL;ACP3;XDH;ADA
CvsSt	GO_Biological_Process_2021	regulation of animal organ morphogenesis (GO:2000027)	4/9	0.00542077	0.166861	8.22528	42.9156	SHH;SAPCD2;SIX2;AJAP1
CvsSt	GO_Biological_Process_2021	negative regulation of bone mineralization (GO:0030502)	5/14	0.00555241	0.166861	5.71397	29.6756	CCR1;SRGN;AHSG;RFLNB;RFLNA
CvsSt	GO_Biological_Process_2021	regulation of vasculogenesis (GO:2001212)	5/14	0.00555241	0.166861	5.71397	29.6756	HEY2;KDR;EMP2;ASB4;XDH
CvsSt	GO_Biological_Process_2021	regulation of cellular biosynthetic process (GO:0031326)	8/32	0.00577121	0.166861	3.43137	17.6883	C3;CXCL8;PRKAA2;STC2;NR1H4;CTNS;MFSD12;CES1
CvsSt	GO_Biological_Process_2021	adenylate cyclase-inhibiting G protein-coupled receptor signaling pathway (GO:0007193)	12/60	0.00583706	0.166861	2.57596	13.2495	CHRM2;AKAP12;CORT;MARCO;GRM4;HRH3;PDE2A;NPY1R;ADCY2;GNAT1;OPRM1;ADCY1
CvsSt	GO_Biological_Process_2021	homophilic cell adhesion via plasma membrane adhesion molecules (GO:0007156)	12/60	0.00583706	0.166861	2.57596	13.2495	KIRREL3;IGSF11;CD84;CDH4;AMIGO1;NEXN;EMB;IGFN1;NECTIN3;MYPN;IGSF9;ROBO1
CvsSt	GO_Biological_Process_2021	sensory perception of sound (GO:0007605)	16/91	0.00607739	0.166861	2.19988	11.2264	CLIC5;RIPOR2;KCNE1;WHRN;COL11A2;LHFPL3;MYO7A;TMC2;COL1A1;LOXHD1;USH1G;KIT;ROR1;ATP6V0A4;GRAP;SLC26A5
CvsSt	GO_Biological_Process_2021	catechol-containing compound biosynthetic process (GO:0009713)	3/5	0.00609454	0.166861	15.4162	78.6284	DDC;PAH;DBH
CvsSt	GO_Biological_Process_2021	cellular response to cGMP (GO:0071321)	3/5	0.00609454	0.166861	15.4162	78.6284	PDE2A;PDE3A;HCN2
CvsSt	GO_Biological_Process_2021	homoserine metabolic process (GO:0009092)	3/5	0.00609454	0.166861	15.4162	78.6284	MPST;TST;CTH
CvsSt	GO_Biological_Process_2021	negative regulation of regulatory T cell differentiation (GO:0045590)	3/5	0.00609454	0.166861	15.4162	78.6284	MDK;IRF1;TNFSF4
CvsSt	GO_Biological_Process_2021	positive regulation of heat generation (GO:0031652)	3/5	0.00609454	0.166861	15.4162	78.6284	SLC27A1;IL1B;TNF
CvsSt	GO_Biological_Process_2021	pulmonary artery morphogenesis (GO:0061156)	3/5	0.00609454	0.166861	15.4162	78.6284	BMP4;HEY2;STRA6
CvsSt	GO_Biological_Process_2021	regulation of dendritic cell cytokine production (GO:0002730)	3/5	0.00609454	0.166861	15.4162	78.6284	KIT;PLCG2;JAK3
CvsSt	GO_Biological_Process_2021	regulation of fever generation (GO:0031620)	3/5	0.00609454	0.166861	15.4162	78.6284	IL1B;TNF;PTGES
CvsSt	GO_Biological_Process_2021	regulation of sterol transport (GO:0032371)	3/5	0.00609454	0.166861	15.4162	78.6284	LRP1;TSPO;APOA4
CvsSt	GO_Biological_Process_2021	response to cGMP (GO:0070305)	3/5	0.00609454	0.166861	15.4162	78.6284	PDE2A;PDE3A;HCN2
CvsSt	GO_Biological_Process_2021	transsulfuration (GO:0019346)	3/5	0.00609454	0.166861	15.4162	78.6284	MPST;TST;CTH
CvsSt	GO_Biological_Process_2021	positive regulation of phagocytosis (GO:0050766)	11/53	0.00609732	0.166861	2.69799	13.7595	C3;CAMK1D;PTPRC;AHSG;IL15;IL1B;CCL2;GATA2;MERTK;FCGR2B;TNF
CvsSt	GO_Biological_Process_2021	endothelial cell migration (GO:0043542)	9/39	0.00615509	0.166861	3.08896	15.7243	DPP4;CDH5;STARD13;EGR3;FAP;NOS3;TNFSF12;EMP2;LOXL2
CvsSt	GO_Biological_Process_2021	alpha-amino acid metabolic process (GO:1901605)	10/46	0.00622865	0.166861	2.86083	14.529	IYD;DDAH2;HNF4A;GPT2;ASPG;PYCR1;NOX4;KYAT1;ASPA;ASS1
CvsSt	GO_Biological_Process_2021	regulation of B cell proliferation (GO:0030888)	10/46	0.00622865	0.166861	2.86083	14.529	IL10;VAV3;PTPRC;TYROBP;IL7;MZB1;RC3H1;TNFRSF13C;EPHB2;FCGR2B
CvsSt	GO_Biological_Process_2021	interferon-gamma-mediated signaling pathway (GO:0060333)	13/68	0.00626124	0.166861	2.4359	12.3582	CAMK2B;SP100;IFNGR2;CAMK2A;HLA-E;OAS1;IRF4;IRF1;HLA-DRA;NCAM1;GBP2;B2M;HLA-DQB1
CvsSt	GO_Biological_Process_2021	embryonic digestive tract development (GO:0048566)	6/20	0.00633087	0.166861	4.4092	22.3208	CXCL8;FOXF1;SIX2;PCSK5;TNF;STRA6
CvsSt	GO_Biological_Process_2021	fatty acid transport (GO:0015908)	6/20	0.00633087	0.166861	4.4092	22.3208	SLC27A1;FABP3;FABP4;FABP5;APOE;PPARD
CvsSt	GO_Biological_Process_2021	ganglioside metabolic process (GO:0001573)	6/20	0.00633087	0.166861	4.4092	22.3208	NEU2;HEXB;ST8SIA2;ST8SIA4;ST3GAL5;ST6GALNAC3
CvsSt	GO_Biological_Process_2021	negative regulation of axon extension involved in axon guidance (GO:0048843)	6/20	0.00633087	0.166861	4.4092	22.3208	SEMA5A;SEMA4A;SEMA6D;SEMA3B;SEMA4F;SEMA3F
CvsSt	GO_Biological_Process_2021	regulation of tissue remodeling (GO:0034103)	6/20	0.00633087	0.166861	4.4092	22.3208	GPNMB;IL15;MDK;IL18;SYT7;THBS4
CvsSt	GO_Biological_Process_2021	organic acid transport (GO:0015849)	17/100	0.00675244	0.176937	2.11235	10.5572	SLC27A1;SLC6A19;SLC23A1;SLC10A2;NR1H4;SLC6A12;SLC3A2;SLC1A5;SLC7A11;SLC7A2;SLC25A48;SLC7A8;SLC7A9;SLC38A3;SLC13A5;SFXN5;PPARD
CvsSt	GO_Biological_Process_2021	keratan sulfate metabolic process (GO:0042339)	8/33	0.00703653	0.179689	3.29394	16.3269	HEXB;OMD;CHST1;ST3GAL6;ST3GAL1;CHST5;B4GALT4;CHST2
CvsSt	GO_Biological_Process_2021	positive regulation of cholesterol transport (GO:0032376)	8/33	0.00703653	0.179689	3.29394	16.3269	LRP1;ABCA3;PTCH1;LPCAT3;SCP2D1;ZDHHC8;APOE;CES1
CvsSt	GO_Biological_Process_2021	positive regulation of cytokine production involved in immune response (GO:0002720)	8/33	0.00703653	0.179689	3.29394	16.3269	SLC7A5;SPHK2;TNFSF4;WNT5A;KIT;PLCG2;B2M;HLA-E
CvsSt	GO_Biological_Process_2021	regulation of cholesterol efflux (GO:0010874)	8/33	0.00703653	0.179689	3.29394	16.3269	SHH;LRP1;ABCA3;PTCH1;PLA2G10;ZDHHC8;APOE;CES1
CvsSt	GO_Biological_Process_2021	unsaturated fatty acid metabolic process (GO:0033559)	11/54	0.00705678	0.179689	2.6351	13.0537	FADS2;FAAH;DAGLA;CYP2D6;ALOX5;ELOVL3;PLA2G10;ALOX15;ABCD1;ALOX15B;FADS1
CvsSt	GO_Biological_Process_2021	bone development (GO:0060348)	9/40	0.00732951	0.183473	2.98916	14.6942	CYP26B1;GJA1;PTPRC;LRRC17;STC1;NOTUM;SULF1;LRP6;LTF
CvsSt	GO_Biological_Process_2021	digestive tract development (GO:0048565)	9/40	0.00732951	0.183473	2.98916	14.6942	CXCL8;EDNRB;FOXF1;KIT;AGR2;GATA4;PCSK5;TNF;STRA6
CvsSt	GO_Biological_Process_2021	sulfur compound catabolic process (GO:0044273)	9/40	0.00732951	0.183473	2.98916	14.6942	GGT5;MPST;TST;HEXB;NCAN;CTH;OMD;CHAC1;GGT1
CvsSt	GO_Biological_Process_2021	MAPK cascade (GO:0000165)	40/303	0.00736825	0.183473	1.57357	7.72712	KLB;CAMK2B;SPTBN5;CAMK2A;TNF;CSF2RA;RASGRP3;SYNGAP1;ERBB4;KDR;CTSH;NEFL;PRKG2;CCL2;NRTN;FYN;NCAM1;JAK3;FGF22;DUSP5;ACTN2;IL18;FRS2;GFRA1;NRG1;NRG2;GFRA2;MT3;SPTB;KITLG;MRAS;DLG2;DLG4;RASA4;IL1B;KIT;RGL1;HBEGF;BCL2L1;FGFR1
CvsSt	GO_Biological_Process_2021	endoderm development (GO:0007492)	5/15	0.00772708	0.18715	5.14229	25.0071	DUSP4;DUSP5;DUSP2;GATA4;HOXC11
CvsSt	GO_Biological_Process_2021	ganglioside biosynthetic process (GO:0001574)	5/15	0.00772708	0.18715	5.14229	25.0071	ST8SIA2;ST8SIA4;ST3GAL5;ST6GALNAC3;ST3GAL1
CvsSt	GO_Biological_Process_2021	glucosamine-containing compound metabolic process (GO:1901071)	5/15	0.00772708	0.18715	5.14229	25.0071	CHST7;CHST1;CHST4;CHST5;CHST2
CvsSt	GO_Biological_Process_2021	medium-chain fatty acid metabolic process (GO:0051791)	5/15	0.00772708	0.18715	5.14229	25.0071	OLAH;ACOT7;ABHD2;CRAT;CES1
CvsSt	GO_Biological_Process_2021	positive regulation of membrane protein ectodomain proteolysis (GO:0051044)	5/15	0.00772708	0.18715	5.14229	25.0071	IL1B;ADAM9;ADAM8;APOE;TNF
CvsSt	GO_Biological_Process_2021	camera-type eye development (GO:0043010)	7/27	0.00780656	0.18715	3.6017	17.4783	ALDH1A3;SHROOM2;CACNA1C;PRSS56;NES;STRA6;FBN1
CvsSt	GO_Biological_Process_2021	monocarboxylic acid catabolic process (GO:0072329)	7/27	0.00780656	0.18715	3.6017	17.4783	FAAH;CYP26B1;LDHD;CEL;AGXT;LPIN3;PPARD
CvsSt	GO_Biological_Process_2021	negative regulation of response to external stimulus (GO:0032102)	19/118	0.00787926	0.187797	1.97982	9.58928	IL10;MAPKBP1;PTGIS;NR1H4;RORA;NMI;AJAP1;CDH5;MFHAS1;C1QTNF3;CLDN3;FNDC4;ALOX5;LPCAT3;DHX58;ENPP3;APOE;LTF;PPARD
CvsSt	GO_Biological_Process_2021	anterior/posterior axis specification (GO:0009948)	6/21	0.00820807	0.187797	4.11503	19.763	MESP2;SHH;SIX2;CER1;HOXD8;WLS
CvsSt	GO_Biological_Process_2021	regulation of cholesterol metabolic process (GO:0090181)	6/21	0.00820807	0.187797	4.11503	19.763	SEC14L2;ACADVL;LPCAT3;NR1H4;APOE;CES1
CvsSt	GO_Biological_Process_2021	positive regulation of vasculature development (GO:1904018)	17/102	0.00823693	0.187797	2.06242	9.89782	SEMA5A;CXCL8;PTGIS;PRKCB;NOS3;TNFSF12;WNT5A;GATA4;VEGFD;GATA2;PIK3R6;HK2;CDH5;IL1B;ADAM12;KDR;CTSH
CvsSt	GO_Biological_Process_2021	transport across blood-brain barrier (GO:0150104)	15/86	0.00834403	0.187797	2.17782	10.4235	SLC27A1;SLC6A17;LRP1;LRP3;ATP1B2;SLC1A5;SLC7A2;SLC7A5;SLC4A8;SLC7A8;FABP5;SLCO3A1;SLC29A4;SLC38A3;SLC29A2
CvsSt	GO_Biological_Process_2021	apical protein localization (GO:0045176)	4/10	0.0084045	0.187797	6.85403	32.7553	INSC;SHROOM2;CELSR1;JAM3
CvsSt	GO_Biological_Process_2021	arginine metabolic process (GO:0006525)	4/10	0.0084045	0.187797	6.85403	32.7553	DDAH2;NOS3;NAGS;ASS1
CvsSt	GO_Biological_Process_2021	neuron projection fasciculation (GO:0106030)	4/10	0.0084045	0.187797	6.85403	32.7553	SEMA5A;AMIGO1;NRCAM;EPHB2
CvsSt	GO_Biological_Process_2021	positive regulation of vascular endothelial growth factor receptor signaling pathway (GO:0030949)	4/10	0.0084045	0.187797	6.85403	32.7553	PRKCB;IL1B;ITGB3;MT3
CvsSt	GO_Biological_Process_2021	regulation of store-operated calcium entry (GO:2001256)	4/10	0.0084045	0.187797	6.85403	32.7553	CD84;GRAMD2A;HOMER3;CASQ1
CvsSt	GO_Biological_Process_2021	response to interleukin-4 (GO:0070670)	4/10	0.0084045	0.187797	6.85403	32.7553	CITED1;LEF1;TCF7;JAK3
CvsSt	GO_Biological_Process_2021	smooth muscle tissue development (GO:0048745)	4/10	0.0084045	0.187797	6.85403	32.7553	BMP4;SHH;PTCH1;STRA6
CvsSt	GO_Biological_Process_2021	urea cycle (GO:0000050)	4/10	0.0084045	0.187797	6.85403	32.7553	ASL;NAGS;ASS1;NMRAL1
CvsSt	GO_Biological_Process_2021	cellular response to alcohol (GO:0097306)	10/48	0.00850025	0.187797	2.70996	12.9202	GOLPH3;SPHK2;PTCH1;TNFSF4;KLF9;ADCY2;ADCY1;CFTR;LRP6;CES1
CvsSt	GO_Biological_Process_2021	cognition (GO:0050890)	10/48	0.00850025	0.187797	2.70996	12.9202	CUX2;HRH3;PTCHD1;CHRNA4;C5AR1;CTNS;HLA-DRA;TNF;GPR155;STRA6
CvsSt	GO_Biological_Process_2021	regulation of interleukin-2 production (GO:0032663)	10/48	0.00850025	0.187797	2.70996	12.9202	CD4;PNP;PTPRC;NAV3;IRF4;IL1B;PDE4B;PLCG2;HOMER3;CARD11
CvsSt	GO_Biological_Process_2021	positive regulation of signal transduction (GO:0009967)	34/252	0.00928419	0.204116	1.6121	7.54372	NLGN3;ITGB3;LY96;AGPAT2;ROBO1;C3;RIMS2;SHH;CUX2;CDH3;STK36;TSPAN5;FGFBP3;WLS;ZRANB1;PTGIS;VWF;PRKCB;CAV2;NOS3;KLK14;EMP2;SORBS1;SULF1;MT3;ERN1;PTPRC;DLG4;IL7;IL1B;AAK1;FAS;LGR6;MYORG
CvsSt	GO_Biological_Process_2021	keratan sulfate biosynthetic process (GO:0018146)	7/28	0.00962687	0.207599	3.43	15.9262	OMD;CHST1;ST3GAL6;ST3GAL1;CHST5;B4GALT4;CHST2
CvsSt	GO_Biological_Process_2021	L-amino acid transport (GO:0015807)	7/28	0.00962687	0.207599	3.43	15.9262	SLC7A5;SLC7A8;SLC7A9;CTNS;SLC3A2;SLC38A3;SLC7A2
CvsSt	GO_Biological_Process_2021	positive regulation of synapse assembly (GO:0051965)	7/28	0.00962687	0.207599	3.43	15.9262	NLGN3;PTPRD;SEMA4A;CUX2;CLSTN3;EPHB2;VSTM5
CvsSt	GO_Biological_Process_2021	regulation of immunoglobulin production (GO:0002637)	7/28	0.00962687	0.207599	3.43	15.9262	IL10;PTPRC;TNFSF4;MZB1;EPHB2;FCGR2B;HLA-E
CvsSt	GO_Biological_Process_2021	lipid homeostasis (GO:0055088)	12/64	0.00986493	0.21172	2.37729	10.9802	ACOXL;FABP3;PRKAA2;HNF4A;RBP1;APOA4;ATP13A2;APOE;CLN8;ABCD1;ABCG1;PNPLA1
CvsSt	GO_Biological_Process_2021	bicarbonate transport (GO:0015701)	8/35	0.0101804	0.214157	3.04961	13.9894	SLC4A8;SLC4A9;CA2;CA5A;CA4;SLC4A1;CA14;CFTR
CvsSt	GO_Biological_Process_2021	negative regulation of cell cycle G1/S phase transition (GO:1902807)	8/35	0.0101804	0.214157	3.04961	13.9894	CDKN2C;CDK6;SLFN11;GPNMB;APC;CCL2;E2F7;MYO16
CvsSt	GO_Biological_Process_2021	regulation of trans-synaptic signaling (GO:0099177)	8/35	0.0101804	0.214157	3.04961	13.9894	NLGN3;SLC4A8;PXK;FABP5;LRRC4;GRIK4;CEL;LRRC4C
CvsSt	GO_Biological_Process_2021	positive regulation of neuron projection development (GO:0010976)	15/88	0.0102907	0.214157	2.11792	9.6927	CAMK2B;NDRG4;CAMK1D;PLK5;WNT5A;ATP1B2;CUX2;MDK;PTK7;DPYSL3;ROR1;ALKAL2;APOE;TOX;S100A9
CvsSt	GO_Biological_Process_2021	sensory perception of mechanical stimulus (GO:0050954)	15/88	0.0102907	0.214157	2.11792	9.6927	CLIC5;RIPOR2;KCNE1;WHRN;COL11A2;LHFPL3;MYO7A;COL1A1;LOXHD1;USH1G;PIEZO2;ROR1;ATP6V0A4;GRAP;SLC26A5
CvsSt	GO_Biological_Process_2021	cellular response to sterol (GO:0036315)	5/16	0.0104297	0.214157	4.67455	21.3304	INSIG1;PTCH1;RORA;LRP6;CES1
CvsSt	GO_Biological_Process_2021	N-acetylglucosamine metabolic process (GO:0006044)	5/16	0.0104297	0.214157	4.67455	21.3304	CHST7;CHST1;CHST4;CHST5;CHST2
CvsSt	GO_Biological_Process_2021	positive regulation of syncytium formation by plasma membrane fusion (GO:0060143)	5/16	0.0104297	0.214157	4.67455	21.3304	CD53;RIPOR2;TYROBP;ADGRB1;ADAM9
CvsSt	GO_Biological_Process_2021	membrane lipid metabolic process (GO:0006643)	6/22	0.0104536	0.214157	3.85763	17.5939	CERKL;GAL3ST1;CERK;SPHK2;ST3GAL6;B4GALT4
CvsSt	GO_Biological_Process_2021	regulation of membrane protein ectodomain proteolysis (GO:0051043)	6/22	0.0104536	0.214157	3.85763	17.5939	IL10;IL1B;ADAM9;ADAM8;APOE;TNF
CvsSt	GO_Biological_Process_2021	adenylate cyclase-modulating G protein-coupled receptor signaling pathway (GO:0007188)	24/165	0.011036	0.220248	1.75683	7.91729	CHRM2;GLP1R;VIPR1;PTH;PDE2A;NPY1R;SCTR;PTH2R;ADCY2;ADCY1;AKAP12;CXCL10;MARCO;ADGRE2;CORT;ADGRG7;GALR3;GPR161;ADGRG5;ADGRB1;S1PR3;GNAT1;ADGRL4;RAMP1
CvsSt	GO_Biological_Process_2021	cation transport (GO:0006812)	25/174	0.0111868	0.220248	1.73199	7.78188	KCNG2;KCNK6;KCNK9;TMEM63C;SLC23A1;SLC3A2;TRPM1;PIEZO2;KCNN4;TRPM6;KCNJ10;SLC6A17;KCNJ13;SLC9B2;SCNN1G;SLC5A9;SLC7A8;KCNS1;KCNS3;KCNQ4;SLC29A4;SCN4A;RHCG;SCN4B;KCNK3
CvsSt	GO_Biological_Process_2021	glycosaminoglycan biosynthetic process (GO:0006024)	16/97	0.0112057	0.220248	2.03625	9.14548	CHST7;NCAN;OMD;HSPG2;HS3ST1;CHST11;IL1B;GPC1;HAS1;CHST15;CHST1;ST3GAL6;ST3GAL1;CHST5;B4GALT4;CHST2
CvsSt	GO_Biological_Process_2021	astrocyte development (GO:0014002)	3/6	0.0113863	0.220248	10.2769	45.9928	CDK6;MT3;S100A9
CvsSt	GO_Biological_Process_2021	embryonic camera-type eye development (GO:0031076)	3/6	0.0113863	0.220248	10.2769	45.9928	ALDH1A3;NES;LRP6
CvsSt	GO_Biological_Process_2021	epithelial tube branching involved in lung morphogenesis (GO:0060441)	3/6	0.0113863	0.220248	10.2769	45.9928	BMP4;CTSH;CELSR1
CvsSt	GO_Biological_Process_2021	hydrogen sulfide metabolic process (GO:0070813)	3/6	0.0113863	0.220248	10.2769	45.9928	MPST;CTH;SQOR
CvsSt	GO_Biological_Process_2021	medium-chain fatty acid biosynthetic process (GO:0051792)	3/6	0.0113863	0.220248	10.2769	45.9928	OLAH;ACOT7;ABHD2
CvsSt	GO_Biological_Process_2021	metanephric collecting duct development (GO:0072205)	3/6	0.0113863	0.220248	10.2769	45.9928	BMP4;SHH;PTCH1
CvsSt	GO_Biological_Process_2021	regulation of adiponectin secretion (GO:0070163)	3/6	0.0113863	0.220248	10.2769	45.9928	C1QTNF3;IL1B;RAB11FIP5
CvsSt	GO_Biological_Process_2021	regulation of immature T cell proliferation in thymus (GO:0033084)	3/6	0.0113863	0.220248	10.2769	45.9928	BMP4;SHH;IL1B
CvsSt	GO_Biological_Process_2021	regulation of T-helper cell differentiation (GO:0045622)	3/6	0.0113863	0.220248	10.2769	45.9928	IRF4;HLA-DRA;RC3H1
CvsSt	GO_Biological_Process_2021	regulation of thymocyte apoptotic process (GO:0070243)	3/6	0.0113863	0.220248	10.2769	45.9928	BMP4;ADAM8;JAK3
CvsSt	GO_Biological_Process_2021	lipid catabolic process (GO:0016042)	7/29	0.0117384	0.220666	3.27391	14.5522	HSD11B1;LIPE;LIPH;APOA4;CEL;MT3;CES1
CvsSt	GO_Biological_Process_2021	negative regulation of wound healing (GO:0061045)	7/29	0.0117384	0.220666	3.27391	14.5522	CLDN3;ALOX5;APOE;TNF;PHLDB2;KNG1;AJAP1
CvsSt	GO_Biological_Process_2021	positive regulation of leukocyte migration (GO:0002687)	7/29	0.0117384	0.220666	3.27391	14.5522	TNFSF18;EDN3;MDK;ADAM8;TNF;PRSS56;JAM3
CvsSt	GO_Biological_Process_2021	transition metal ion homeostasis (GO:0055076)	7/29	0.0117384	0.220666	3.27391	14.5522	TF;HEPHL1;SLC40A1;CYBRD1;ATP13A2;B2M;MT3
CvsSt	GO_Biological_Process_2021	positive regulation of T cell differentiation (GO:0045582)	9/43	0.0118889	0.220666	2.72496	12.0774	SHH;PNP;SOCS1;MDK;IL7;TNFSF4;LEF1;HLA-DRA;ADAM8
CvsSt	GO_Biological_Process_2021	regulation of ERK1 and ERK2 cascade (GO:0070372)	32/238	0.0119041	0.220666	1.60488	7.11102	NDRG4;CCL11;ALOX15;C5AR1;GATA4;FBLN1;TNF;SPRED2;GPNMB;GLIPR2;CAMK2N1;ERBB4;KDR;CCL2;ALKAL2;APOE;EPHB2;FAM83D;CCR1;DUSP4;CCL23;CCL22;OPRM1;MT3;MARCO;MFHAS1;CD4;PTPRC;IL1B;ROR1;TLR4;EPHA2
CvsSt	GO_Biological_Process_2021	endoderm formation (GO:0001706)	8/36	0.0120945	0.220666	2.94053	12.9825	DUSP4;DUSP5;DUSP2;ITGA4;MMP15;COL6A1;ITGA7;MMP9
CvsSt	GO_Biological_Process_2021	negative regulation of fat cell differentiation (GO:0045599)	8/36	0.0120945	0.220666	2.94053	12.9825	WNT10B;BBS12;WNT5A;LRP3;RORA;GATA2;TNF;ZFPM1
CvsSt	GO_Biological_Process_2021	retina homeostasis (GO:0001895)	8/36	0.0120945	0.220666	2.94053	12.9825	TF;CDH3;WHRN;ZG16B;ALB;ATP1B2;B2M;LTF
CvsSt	GO_Biological_Process_2021	regulation of phagocytosis (GO:0050764)	11/58	0.0121195	0.220666	2.41031	10.6365	PLSCR1;CAMK1D;PTPRC;AHSG;IL15;IL1B;GATA2;MERTK;FCGR2B;TNF;SYT7
CvsSt	GO_Biological_Process_2021	angiogenesis involved in wound healing (GO:0060055)	4/11	0.0122892	0.220666	5.87456	25.8424	ITGB3;KDR;HPSE;GATA2
CvsSt	GO_Biological_Process_2021	negative regulation of T-helper cell differentiation (GO:0045623)	4/11	0.0122892	0.220666	5.87456	25.8424	TNFSF4;RC3H1;JAK3;SMAD7
CvsSt	GO_Biological_Process_2021	positive regulation of ceramide biosynthetic process (GO:2000304)	4/11	0.0122892	0.220666	5.87456	25.8424	SMPD3;SPHK2;TNF;NSMAF
CvsSt	GO_Biological_Process_2021	positive regulation of sphingolipid biosynthetic process (GO:0090154)	4/11	0.0122892	0.220666	5.87456	25.8424	SMPD3;SPHK2;TNF;NSMAF
CvsSt	GO_Biological_Process_2021	regulation of melanin biosynthetic process (GO:0048021)	4/11	0.0122892	0.220666	5.87456	25.8424	CDH3;TYRP1;CTNS;MFSD12
CvsSt	GO_Biological_Process_2021	regulation of monocyte chemotactic protein-1 production (GO:0071637)	4/11	0.0122892	0.220666	5.87456	25.8424	C1QTNF3;OAS1;IL1B;APOD
CvsSt	GO_Biological_Process_2021	urate metabolic process (GO:0046415)	4/11	0.0122892	0.220666	5.87456	25.8424	SLC2A9;GCKR;PNP;SLC17A1
CvsSt	GO_Biological_Process_2021	vasoconstriction (GO:0042310)	4/11	0.0122892	0.220666	5.87456	25.8424	ACTA2;EDNRA;EDNRB;EDN3
CvsSt	GO_Biological_Process_2021	cellular response to oxygen-containing compound (GO:1901701)	41/323	0.0127611	0.228075	1.50351	6.55733	HCN3;KCNE1;CXCL8;INSIG1;WNT8B;LY96;RORA;FZD10;PTPRK;RORB;RYR3;CRHBP;WNT6;WNT11;PDE4B;CCL2;SH3BP4;WNT3;IL10;EGR1;WNT10B;DAPK1;TESC;PDE2A;WNT5A;NR1H4;MT3;MMP9;CXCL10;CPEB1;PTK7;TNFSF4;IL1B;TNIP3;PDE3A;ADAM9;TLR4;SLC26A3;CFTR;HCN2;HCN1
CvsSt	GO_Biological_Process_2021	defense response to bacterium (GO:0042742)	25/176	0.0128261	0.228075	1.70886	7.44427	WFDC12;COLEC12;STAB2;LYST;WFDC5;WFDC2;WFDC3;S100A12;PI3;GBP2;CAMP;HLA-E;TF;SLPI;OAS1;IFNE;ADGRB1;LCN2;BPI;LYG2;S100A9;TLR4;S100A8;LTF;GALP
CvsSt	GO_Biological_Process_2021	phosphate-containing compound metabolic process (GO:0006796)	29/212	0.0128827	0.228075	1.63649	7.12182	CERKL;CERK;DUSP15;CLN8;AGPAT2;PLB1;HK2;PPP3CA;PLCG2;ENPP3;ACP3;EPHB2;DUSP4;PLA2G2F;DUSP5;MIOX;PLA2G2E;SPHK2;GFPT2;DUSP8;ALOX15B;PGM2L1;PTPRD;PLCB4;PTPRC;HKDC1;PLA2G10;ALDOB;PLCD1
CvsSt	GO_Biological_Process_2021	mitotic cell cycle checkpoint signaling (GO:0007093)	6/23	0.0131022	0.228075	3.63051	15.7382	PLK3;PLK5;PLK2;ZFYVE19;NABP1;BUB1
CvsSt	GO_Biological_Process_2021	negative regulation of smoothened signaling pathway (GO:0045879)	6/23	0.0131022	0.228075	3.63051	15.7382	HERC4;KCTD21;HHIP;PTCH1;GPR161;PTCH2
CvsSt	GO_Biological_Process_2021	positive regulation of cholesterol efflux (GO:0010875)	6/23	0.0131022	0.228075	3.63051	15.7382	LRP1;ABCA3;PTCH1;ZDHHC8;APOE;CES1
CvsSt	GO_Biological_Process_2021	regulation of interleukin-4 production (GO:0032673)	6/23	0.0131022	0.228075	3.63051	15.7382	SLC7A5;IRF4;TNFSF4;LEF1;ZFPM1;HLA-E
CvsSt	GO_Biological_Process_2021	response to calcium ion (GO:0051592)	17/107	0.0131066	0.228075	1.94731	8.44087	PRKAA2;CPNE5;WNT5A;ALOX15;ADCY1;SYT7;RYR3;SYT6;SYT17;CRHBP;PPP3CA;SYT12;RASA4;ALOX5AP;CHP2;PLCG2;ADAM9
CvsSt	GO_Biological_Process_2021	cellular response to organic cyclic compound (GO:0071407)	22/150	0.0132452	0.229601	1.77323	7.66767	EGR1;HCN3;KCNE1;INSIG1;PDE2A;IL18;NR1H4;RORA;ADCY2;ADCY1;TNF;RYR3;CRHBP;GOLPH3;IL1B;PDE3A;EPG5;CCL2;SLC26A3;CFTR;HCN2;HCN1
CvsSt	GO_Biological_Process_2021	pyrimidine-containing compound catabolic process (GO:0072529)	5/17	0.013714	0.235804	4.28477	18.3789	NT5E;DPYSL4;DPYSL2;DPYSL3;UPP1
CvsSt	GO_Biological_Process_2021	stabilization of membrane potential (GO:0030322)	5/17	0.013714	0.235804	4.28477	18.3789	KCNK6;KCNK9;KCNN4;KCNK2;KCNK3
CvsSt	GO_Biological_Process_2021	positive regulation of angiogenesis (GO:0045766)	18/116	0.0137601	0.235804	1.89378	8.11671	SEMA5A;CXCL8;PTGIS;PRKCB;NOS3;TNFSF12;WNT5A;GATA4;VEGFD;GATA2;PIK3R6;HK2;CDH5;MDK;IL1B;ADAM12;KDR;CTSH
CvsSt	GO_Biological_Process_2021	glycoprotein biosynthetic process (GO:0009101)	14/83	0.0140979	0.238605	2.09059	8.90954	CHST8;ST8SIA1;ST8SIA2;GCNT1;PMM2;SERP2;GOLPH3;B3GNT8;NPC1;CHST11;ST8SIA4;ST3GAL5;ST8SIA5;ST3GAL6
CvsSt	GO_Biological_Process_2021	long-chain fatty acid metabolic process (GO:0001676)	14/83	0.0140979	0.238605	2.09059	8.90954	FAAH;CPT1A;DAGLA;ASAH2;ELOVL3;ALOX15;ALOX15B;FADS2;CYP2D6;ALOX5;PLA2G10;CYP2E1;ABCD1;FADS1
CvsSt	GO_Biological_Process_2021	positive regulation of lymphocyte proliferation (GO:0050671)	13/75	0.0141921	0.238605	2.16005	9.19114	VAV3;IL15;IL18;TNFRSF13C;HLA-E;PNP;HLA-DMB;PTPRC;IL7;IL1B;TNFSF4;EPHB2;JAK3
CvsSt	GO_Biological_Process_2021	negative regulation of epithelial cell apoptotic process (GO:1904036)	8/37	0.0142602	0.238605	2.83898	12.0665	SEMA5A;IL10;CDH5;SERPINB13;MDK;KDR;NUPR1;GATA2
CvsSt	GO_Biological_Process_2021	regulation of microtubule cytoskeleton organization (GO:0070507)	8/37	0.0142602	0.238605	2.83898	12.0665	PRKAA2;MAP6;TRIM36;SKA3;BICD1;GAS2L2;PHLDB2;SKA1
CvsSt	GO_Biological_Process_2021	positive regulation of cell migration (GO:0030335)	35/269	0.0142901	0.238605	1.54556	6.56581	SEMA5A;LRRC15;DOCK5;CCL11;LEF1;SEMA3B;SEMA3F;PPP3CA;CDH5;WNT11;GPNMB;GLIPR2;MDK;KDR;PLCG2;CTSH;EPHB2;CCR1;TNFSF18;SERPINB3;SEMA4A;PRKCE;SEMA6D;SEMA4F;RHOC;MMP9;COL1A1;CLDN3;PTPRC;APC;IL1B;KIT;ADAM9;LGR6;HBEGF
CvsSt	GO_Biological_Process_2021	regulation of protein secretion (GO:0050708)	19/125	0.014294	0.238605	1.84836	7.85166	GLP1R;KCNG2;SNAP25;KCNJ11;FRMD4A;CACNA1C;TNF;SYT7;DPP4;GOLPH3;HNF4A;IL1B;ALOX5;KCNS3;ADAM9;ADAM8;ATP13A2;APOE;ABCG1
CvsSt	GO_Biological_Process_2021	positive regulation of protein localization to plasma membrane (GO:1903078)	10/52	0.0148898	0.247632	2.45133	10.3129	LRP1;CNPY4;PRKCE;AGR2;ZDHHC8;SORBS1;EPHB2;TNF;EPHA2;NKD2
CvsSt	GO_Biological_Process_2021	receptor-mediated endocytosis (GO:0006898)	21/143	0.0150538	0.249439	1.77545	7.45002	LMBR1L;COLEC12;NLGN3;CXCL8;AMBP;LRP1;CAV2;MX1;STAB2;AP2A1;LRP3;HSPG2;LRP6;MARCO;FCHO1;DNAJC6;ALB;MRC1;APOE;FCGR2B;RAMP1
CvsSt	GO_Biological_Process_2021	vascular transport (GO:0010232)	14/84	0.0155771	0.257165	2.06061	8.57618	SLC27A1;SLC6A17;LRP1;LRP3;ATP1B2;SLC1A5;SLC7A2;SLC7A5;SLC4A8;SLC7A8;SLCO3A1;SLC29A4;SLC38A3;SLC29A2
CvsSt	GO_Biological_Process_2021	regulation of T cell proliferation (GO:0042129)	13/76	0.0157709	0.259414	2.12564	8.82054	IL10;PLA2G2F;TNFSF18;IL15;TNFRSF13C;PNP;HLA-DMB;PTPRC;GPNMB;IL1B;TNFSF4;JAK3;IDO1
CvsSt	GO_Biological_Process_2021	amino acid transmembrane transport (GO:0003333)	9/45	0.0159276	0.260094	2.57329	10.6526	SLC7A5;SLC7A8;SLC7A9;SLC7A13;SLC38A11;SLC3A2;SLC7A11;SLC38A3;MFSD12
CvsSt	GO_Biological_Process_2021	regulation of insulin receptor signaling pathway (GO:0046626)	9/45	0.0159276	0.260094	2.57329	10.6526	PTPRE;SOCS1;AHSG;PRKCB;IL1B;MZB1;VWA2;SORBS1;SIK2
CvsSt	GO_Biological_Process_2021	axon extension (GO:0048675)	6/24	0.0161865	0.262358	3.42863	14.1382	NLGN3;SEMA5A;NRP2;ALCAM;SLIT1;SEMA3F
CvsSt	GO_Biological_Process_2021	regulation of axon extension involved in axon guidance (GO:0048841)	6/24	0.0161865	0.262358	3.42863	14.1382	SEMA5A;SEMA4A;SEMA6D;SEMA3B;SEMA4F;SEMA3F
CvsSt	GO_Biological_Process_2021	anterograde trans-synaptic signaling (GO:0098916)	32/244	0.0166675	0.262358	1.55894	6.38276	CHRM2;GRIA1;NLGN3;GRIA2;SNAP25;CHRNA4;GRIK4;DBH;CPLX1;CAMKK1;LRP6;GRM4;GALR3;PTCHD1;HRH3;PRKACG;SNCG;NPTX1;ASIC2;NPTX2;GABRP;DTNA;CEL;CORT;DLG2;PRKAR1B;DLG4;PLP1;CRH;MYCBPAP;PDE7B;KCNK3
CvsSt	GO_Biological_Process_2021	ventricular septum development (GO:0003281)	8/38	0.0166946	0.262358	2.74419	11.2311	HEYL;HEY2;PDE2A;GATA4;ZFPM1;ROBO1;STRA6;SMAD7
CvsSt	GO_Biological_Process_2021	negative regulation of axon extension (GO:0030517)	7/31	0.0169295	0.262358	3.00075	12.2392	SEMA5A;SEMA4A;SEMA6D;SEMA3B;SEMA4F;SEMA3F;MT3
CvsSt	GO_Biological_Process_2021	regulation of cellular pH (GO:0030641)	7/31	0.0169295	0.262358	3.00075	12.2392	SLC9A2;SLC4A8;SLC4A9;SLC9A5;CA2;SLC4A1;SLC9C1
CvsSt	GO_Biological_Process_2021	cardiac muscle tissue development (GO:0048738)	10/53	0.0169346	0.262358	2.39419	9.76446	BMP4;GJA1;ACTC1;MSX2;HEY2;NRG1;GATA4;MSX1;MSC;ZFPM1
CvsSt	GO_Biological_Process_2021	positive regulation of chemokine production (GO:0032722)	10/53	0.0169346	0.262358	2.39419	9.76446	EGR1;OAS1;IL7;IL1B;TNFSF4;WNT5A;IL18;TNF;TLR4;ALOX15B
CvsSt	GO_Biological_Process_2021	negative regulation of inflammatory response to antigenic stimulus (GO:0002862)	20/136	0.0171192	0.262358	1.77794	7.23188	GGT5;GLP1R;IL10;VIPR1;GPR15;PTH;PLK2;SCTR;GPR83;PTH2R;ADCY2;ADCY1;PRKAR1B;PRKACG;PLCG2;CRH;FYN;GGT1;FCGR2B;RAMP1
CvsSt	GO_Biological_Process_2021	actin crosslink formation (GO:0051764)	4/12	0.017157	0.262358	5.13995	20.8957	GAS2L3;DPYSL3;LCP1;GAS2L2
CvsSt	GO_Biological_Process_2021	axonal fasciculation (GO:0007413)	4/12	0.017157	0.262358	5.13995	20.8957	SEMA5A;AMIGO1;NRCAM;EPHB2
CvsSt	GO_Biological_Process_2021	catecholamine biosynthetic process (GO:0042423)	4/12	0.017157	0.262358	5.13995	20.8957	DDC;DAO;PAH;DBH
CvsSt	GO_Biological_Process_2021	homocysteine metabolic process (GO:0050667)	4/12	0.017157	0.262358	5.13995	20.8957	MPST;TST;CTH;NOX4
CvsSt	GO_Biological_Process_2021	negative regulation of B cell proliferation (GO:0030889)	4/12	0.017157	0.262358	5.13995	20.8957	IL10;TYROBP;RC3H1;FCGR2B
CvsSt	GO_Biological_Process_2021	positive regulation of neuroinflammatory response (GO:0150078)	4/12	0.017157	0.262358	5.13995	20.8957	IL1B;IL18;NUPR1;TNF
CvsSt	GO_Biological_Process_2021	regulation of CD4-positive, alpha-beta T cell differentiation (GO:0043370)	4/12	0.017157	0.262358	5.13995	20.8957	SOCS1;IRF4;TNFSF4;HLA-DRA
CvsSt	GO_Biological_Process_2021	regulation of cholesterol esterification (GO:0010872)	4/12	0.017157	0.262358	5.13995	20.8957	AGTR1;APOA4;APOE;ABCG1
CvsSt	GO_Biological_Process_2021	tyrosine metabolic process (GO:0006570)	4/12	0.017157	0.262358	5.13995	20.8957	DCT;IYD;PAH;TYR
CvsSt	GO_Biological_Process_2021	positive regulation of protein catabolic process (GO:0045732)	14/85	0.0171723	0.262358	2.03148	8.25686	PLK3;PLK2;TNFSF12;WNT5A;ASB11;TNF;NKD1;APC;IL1B;ASB9;ADAM9;ADAM8;APOE;DTL
CvsSt	GO_Biological_Process_2021	inorganic cation import across plasma membrane (GO:0098659)	13/77	0.0174798	0.263073	2.09231	8.46699	KCNH2;KCNJ10;KCNK9;KCNJ11;KCNJ13;TRPV2;TRPV3;ATP1B2;SLC9C1;SLC9A2;SLC9A5;TRPV5;HCN2
CvsSt	GO_Biological_Process_2021	positive regulation of cartilage development (GO:0061036)	5/18	0.0176281	0.263073	3.95496	15.9712	BMP4;BMP1;MDK;SOX6;LOXL2
CvsSt	GO_Biological_Process_2021	regulation of cartilage development (GO:0061035)	5/18	0.0176281	0.263073	3.95496	15.9712	BMP4;BMP1;WNT11;MDK;SOX6
CvsSt	GO_Biological_Process_2021	response to axon injury (GO:0048678)	5/18	0.0176281	0.263073	3.95496	15.9712	TYROBP;MORN4;DPYSL3;APOD;NREP
CvsSt	GO_Biological_Process_2021	calcium-mediated signaling (GO:0019722)	16/102	0.0176723	0.263073	1.91734	7.7379	CCR1;XCR1;CXCL8;CACNA1C;CXCR6;PPP3CA;GPR143;EDNRB;PTPRC;KDR;AGTR1;PLCG2;CCR9;ACKR4;ACKR2;CCR4
CvsSt	GO_Biological_Process_2021	hemopoiesis (GO:0030097)	15/94	0.0183239	0.263073	1.95642	7.82479	IL10;KIRREL3;WNT10B;WNT5A;RUNX2;BMP4;KITLG;MELK;PTPRC;MECOM;KIT;MKNK2;KDR;TOX;ZFPM1
CvsSt	GO_Biological_Process_2021	regulation of cell migration (GO:0030334)	49/408	0.0185361	0.263073	1.41193	5.63081	SEMA5A;KIF14;PTPRK;ROBO1;DOCK10;CDH5;PPP3CA;SHH;MDK;DPYSL3;KDR;CTSH;EPHB2;SERPINB3;SEMA6D;RHOC;MMP9;TMIGD1;CLDN3;NAV3;IL1B;KIT;ADAM9;HBEGF;CAMK2B;LRRC15;CCL11;SEMA3B;CAMK2A;LEF1;STC1;NEXN;PRR5L;SEMA3F;NKD1;WNT11;GPNMB;ERBB4;SRGAP2;FGF22;CCR1;SEMA4A;SEMA4F;SULF1;ALOX15B;SMAD7;COL1A1;APC;LGR6
CvsSt	GO_Biological_Process_2021	amino-acid betaine metabolic process (GO:0006577)	3/7	0.01862	0.263073	7.70728	30.7021	BHMT;CPT1A;CPT1C
CvsSt	GO_Biological_Process_2021	astrocyte differentiation (GO:0048708)	3/7	0.01862	0.263073	7.70728	30.7021	CDK6;MT3;S100A9
CvsSt	GO_Biological_Process_2021	cellular amino acid biosynthetic process (GO:0008652)	3/7	0.01862	0.263073	7.70728	30.7021	PAH;ALDH1A1;BCAT1
CvsSt	GO_Biological_Process_2021	cellular cation homeostasis (GO:0030003)	3/7	0.01862	0.263073	7.70728	30.7021	ATP13A2;TESMIN;MT3
CvsSt	GO_Biological_Process_2021	cellular ion homeostasis (GO:0006873)	3/7	0.01862	0.263073	7.70728	30.7021	ATP13A2;SLC4A1;RHCG
CvsSt	GO_Biological_Process_2021	cellular nitrogen compound catabolic process (GO:0044270)	3/7	0.01862	0.263073	7.70728	30.7021	MPST;TST;CYP2D6
CvsSt	GO_Biological_Process_2021	chemical homeostasis within a tissue (GO:0048875)	3/7	0.01862	0.263073	7.70728	30.7021	OAS1;ABCA3;CTSH
CvsSt	GO_Biological_Process_2021	glutathione catabolic process (GO:0006751)	3/7	0.01862	0.263073	7.70728	30.7021	GGT5;CHAC1;GGT1
CvsSt	GO_Biological_Process_2021	Golgi disassembly (GO:0090166)	3/7	0.01862	0.263073	7.70728	30.7021	PLK3;PLK5;VRK1
CvsSt	GO_Biological_Process_2021	inhibitory postsynaptic potential (GO:0060080)	3/7	0.01862	0.263073	7.70728	30.7021	NLGN3;CHRNA4;INSYN1
CvsSt	GO_Biological_Process_2021	negative regulation of cardiocyte differentiation (GO:1905208)	3/7	0.01862	0.263073	7.70728	30.7021	HEY2;FRS2;SOX6
CvsSt	GO_Biological_Process_2021	nucleobase catabolic process (GO:0046113)	3/7	0.01862	0.263073	7.70728	30.7021	DPYSL4;DPYSL2;DPYSL3
CvsSt	GO_Biological_Process_2021	positive regulation of protein localization to centrosome (GO:1904781)	3/7	0.01862	0.263073	7.70728	30.7021	APC;MARK4;BICD1
CvsSt	GO_Biological_Process_2021	regulation of mitochondrial membrane permeability involved in apoptotic process (GO:1902108)	3/7	0.01862	0.263073	7.70728	30.7021	STPG1;ACAA2;CAMK2A
CvsSt	GO_Biological_Process_2021	regulation of morphogenesis of an epithelium (GO:1905330)	3/7	0.01862	0.263073	7.70728	30.7021	CXCL10;GJA1;SIX2
CvsSt	GO_Biological_Process_2021	surfactant homeostasis (GO:0043129)	3/7	0.01862	0.263073	7.70728	30.7021	OAS1;ABCA3;CTSH
CvsSt	GO_Biological_Process_2021	thiamine-containing compound metabolic process (GO:0042723)	3/7	0.01862	0.263073	7.70728	30.7021	TKTL1;TPK1;ACP3
CvsSt	GO_Biological_Process_2021	cellular response to lipid (GO:0071396)	29/219	0.0194027	0.272237	1.57559	6.21152	CXCL8;INSIG1;WNT8B;LY96;ADCY2;RORA;FZD10;ADCY1;RORB;CRHBP;WNT6;WNT11;PDE4B;CCL2;WNT3;IL10;WNT10B;SPHK2;TESC;WNT5A;NR1H4;CXCL10;PTK7;TNFSF4;IL1B;TNIP3;ADAM9;TLR4;CFTR
CvsSt	GO_Biological_Process_2021	response to retinoic acid (GO:0032526)	11/62	0.0195616	0.272237	2.22077	8.73694	WNT6;WNT10B;WNT11;PTK7;TESC;WNT5A;CTSH;WNT8B;FZD10;RORB;WNT3
CvsSt	GO_Biological_Process_2021	kidney development (GO:0001822)	12/70	0.0195751	0.272237	2.13066	8.38094	BMP4;SHH;CENPF;CITED1;SIX2;C1GALT1;AGTR1;CTSH;HNF1B;SULF1;PCSK5;STRA6
CvsSt	GO_Biological_Process_2021	acylglycerol homeostasis (GO:0055090)	6/25	0.0197374	0.272237	3.24799	12.7492	GCKR;HNF4A;IL18;RORA;APOA4;APOE
CvsSt	GO_Biological_Process_2021	peptide catabolic process (GO:0043171)	6/25	0.0197374	0.272237	3.24799	12.7492	GGT5;ADAMTS13;ANPEP;CTSH;CHAC1;GGT1
CvsSt	GO_Biological_Process_2021	phosphatidylglycerol metabolic process (GO:0046471)	6/25	0.0197374	0.272237	3.24799	12.7492	PLA2G2F;SLC27A1;LPGAT1;PLA2G2E;ABCA3;PLA2G10
CvsSt	GO_Biological_Process_2021	positive regulation of vascular endothelial growth factor production (GO:0010575)	6/25	0.0197374	0.272237	3.24799	12.7492	C3;IL1B;GATA4;RORA;HPSE;SULF1
CvsSt	GO_Biological_Process_2021	phosphorylation (GO:0016310)	48/400	0.0198706	0.272237	1.41035	5.52649	CAMK2B;CERKL;NIM1K;PXK;CCL11;DGKD;PRKAA2;CERK;GMFG;CAMK2A;LIPE;WNT11;STK36;MKNK1;MKNK2;CDK20;PRKG2;CCL2;NEK2;FYN;MAP3K6;EPHB2;MARK4;JAK3;PAK5;MARK1;PRRT1;CDK18;DAPK1;PRKCB;SPHK2;PRKCE;PLK2;LMTK3;HUNK;VRK1;MERTK;ERN1;MELK;CDK6;PRKAR1B;AAK1;SIK2;FAM20A;SGK2;CDK15;DGKI;FGFR1
CvsSt	GO_Biological_Process_2021	sensory perception of light stimulus (GO:0050953)	15/95	0.0200318	0.272237	1.93186	7.5544	CRYBG3;WHRN;RGS16;TULP2;MYO7A;ARR3;CACNA1F;TYR;TRPM1;COL1A1;ABLIM1;GPR143;RDH12;USH1G;GNAT1
CvsSt	GO_Biological_Process_2021	positive regulation of cytosolic calcium ion concentration (GO:0007204)	21/147	0.0200363	0.272237	1.71871	6.72051	CCR1;GLP1R;XCR1;GPR35;C5AR2;C5AR1;CACNA1C;CXCR6;JPH1;KNG1;TRPM1;EDNRA;DLG4;AGTR1;CCR9;ACKR4;S1PR3;ACKR2;CCR4;GPR18;GPR157
CvsSt	GO_Biological_Process_2021	hematopoietic progenitor cell differentiation (GO:0002244)	7/32	0.0200538	0.272237	2.88057	11.2611	LMBR1L;BMP4;SHH;PTPRC;KIT;KDR;MLLT3
CvsSt	GO_Biological_Process_2021	negative regulation of chemotaxis (GO:0050922)	7/32	0.0200538	0.272237	2.88057	11.2611	SEMA5A;SEMA4A;SEMA6D;SEMA3B;SEMA4F;SEMA3F;ROBO1
CvsSt	GO_Biological_Process_2021	positive regulation of immune effector process (GO:0002699)	7/32	0.0200538	0.272237	2.88057	11.2611	IL10;HLA-DMB;PTPRC;IL1B;TNFSF4;DHX58;HLA-DRA
CvsSt	GO_Biological_Process_2021	positive regulation of neuron death (GO:1901216)	9/47	0.0208898	0.282588	2.43758	9.42977	C1QA;EGR1;TYROBP;WNT5A;FYN;NUPR1;FCGR2B;TNF;TLR4
CvsSt	GO_Biological_Process_2021	cellular metal ion homeostasis (GO:0006875)	16/104	0.0209417	0.282588	1.87355	7.24318	CCR1;SLC24A4;CCL23;CCL11;EDN3;STC1;SLC30A1;ATP1B2;MT3;CDH5;STC2;ATP13A4;ATP13A5;TESMIN;ATP13A2;SLC24A5
CvsSt	GO_Biological_Process_2021	positive regulation of response to external stimulus (GO:0032103)	20/139	0.021275	0.286229	1.73283	6.67179	LRSAM1;IL15;WNT5A;PDE2A;IL18;LY96;NMI;TNF;PLA2G7;PLSCR1;MDK;TNFSF4;IL1B;DHX58;AGTR1;S100A12;ADAM8;S100A9;TLR4;S100A8
CvsSt	GO_Biological_Process_2021	regulation of cytosolic calcium ion concentration (GO:0051480)	21/148	0.0214619	0.287884	1.70508	6.55002	CCR1;GLP1R;XCR1;TMEM178A;CAV2;GPR35;C5AR2;WNT5A;C5AR1;CACNA1C;CXCR6;KNG1;SCGN;EDNRA;DLG4;AGTR1;CCR9;ACKR4;S1PR3;ACKR2;CCR4
CvsSt	GO_Biological_Process_2021	positive regulation of cell motility (GO:2000147)	29/221	0.0216793	0.289936	1.55901	5.97317	SEMA5A;LRRC15;CCL11;LEF1;SEMA3B;SEMA3F;PPP3CA;CDH5;WNT11;GPNMB;MDK;KDR;CTSH;EPHB2;CCR1;SERPINB3;SEMA4A;SEMA6D;SEMA4F;RHOC;MMP9;COL1A1;CLDN3;APC;IL1B;KIT;ADAM9;LGR6;HBEGF
CvsSt	GO_Biological_Process_2021	negative regulation of endopeptidase activity (GO:0010951)	11/63	0.0218592	0.290205	2.17795	8.32658	SERPINB3;SERPINB13;AHSG;SERPINC1;SERPINF1;FETUB;SPOCK1;SERPINB7;MT3;KNG1;LTF
CvsSt	GO_Biological_Process_2021	atrioventricular valve morphogenesis (GO:0003181)	5/19	0.0222145	0.290205	3.67226	13.9803	HEYL;OLFM1;HEY2;GATA4;ZFPM1
CvsSt	GO_Biological_Process_2021	diol metabolic process (GO:0034311)	5/19	0.0222145	0.290205	3.67226	13.9803	ASAH2;NOS3;SPHK2;PRKG2;PTS
CvsSt	GO_Biological_Process_2021	fatty acid transmembrane transport (GO:1902001)	5/19	0.0222145	0.290205	3.67226	13.9803	CPT1A;SLC27A1;PRKAA2;ABCD1;ACACA
CvsSt	GO_Biological_Process_2021	myeloid cell activation involved in immune response (GO:0002275)	5/19	0.0222145	0.290205	3.67226	13.9803	TYROBP;PLCG2;NMI;ENPP3;DNASE1L3
CvsSt	GO_Biological_Process_2021	negative regulation of nervous system development (GO:0051961)	5/19	0.0222145	0.290205	3.67226	13.9803	CCL11;IL1B;SLIT1;TNF;B2M
CvsSt	GO_Biological_Process_2021	positive regulation of neutrophil chemotaxis (GO:0090023)	5/19	0.0222145	0.290205	3.67226	13.9803	RIPOR2;CAMK1D;CXCL8;MDK;THBS4
CvsSt	GO_Biological_Process_2021	regulation of leukocyte chemotaxis (GO:0002688)	5/19	0.0222145	0.290205	3.67226	13.9803	CAMK1D;EDN3;MDK;MST1;PRSS56
CvsSt	GO_Biological_Process_2021	fatty acid derivative biosynthetic process (GO:1901570)	8/40	0.0224358	0.291278	2.5724	9.76765	GGT5;AWAT2;ALOX5;ALOX5AP;FAR1;PPT2;GGT1;ACACA
CvsSt	GO_Biological_Process_2021	enzyme linked receptor protein signaling pathway (GO:0007167)	20/140	0.0228203	0.291278	1.7183	6.49535	SRMS;GUCY2D;GUCA1B;FRS2;MERTK;GFRA2;PTPRG;PTPRD;CD4;CD8B;ERBB4;KIT;KDR;ROR1;LCP2;FYN;EPHB2;JAK3;EPHA2;FGFR1
CvsSt	GO_Biological_Process_2021	cellular response to cytokine stimulus (GO:0071345)	56/482	0.0228248	0.291278	1.36026	5.14165	RIPOR2;CXCL8;RORA;TNF;CRHBP;DPYSL3;JAK3;IL10;PTGIS;DAPK1;IFNGR2;IL1R2;FOXH1;WNT5A;IL18;RC3H1;IL19;OPRM1;MMP9;OAS1;IRF4;IL1B;IFNE;IRF1;KIT;TLR4;IFNAR1;ASAH2;CCL11;PDE1B;ALOX15;TCF7;LEF1;CSF2RA;MUC1;SOCS1;ALOX5;CCL2;ST3GAL6;FYN;GBP2;IL12RB2;CCR1;EGR1;CCL23;CCL22;IL34;PDE2A;IFNW1;CRNN;CXCL10;CD4;IL7;LCN2;PTPN5;BCL2L1
CvsSt	GO_Biological_Process_2021	alpha-linolenic acid metabolic process (GO:0036109)	4/13	0.0230722	0.291278	4.5686	17.2196	FADS2;ELOVL3;ABCD1;FADS1
CvsSt	GO_Biological_Process_2021	embryonic appendage morphogenesis (GO:0035113)	4/13	0.0230722	0.291278	4.5686	17.2196	CYP26B1;SHH;PTCH1;LRP6
CvsSt	GO_Biological_Process_2021	embryonic hemopoiesis (GO:0035162)	4/13	0.0230722	0.291278	4.5686	17.2196	KITLG;KIT;KDR;ZFPM1
CvsSt	GO_Biological_Process_2021	lipid oxidation (GO:0034440)	4/13	0.0230722	0.291278	4.5686	17.2196	ALOX5;ALOX15;ALOX15B;PLA2G7
CvsSt	GO_Biological_Process_2021	muscle tissue development (GO:0060537)	4/13	0.0230722	0.291278	4.5686	17.2196	BMP4;SHH;PTCH1;STRA6
CvsSt	GO_Biological_Process_2021	positive regulation of protein localization to cell surface (GO:2000010)	4/13	0.0230722	0.291278	4.5686	17.2196	TYROBP;MAP1A;TNF;TMEM35A
CvsSt	GO_Biological_Process_2021	positive regulation of steroid metabolic process (GO:0045940)	4/13	0.0230722	0.291278	4.5686	17.2196	AGTR1;APOA4;APOE;CES1
CvsSt	GO_Biological_Process_2021	purine-containing compound salvage (GO:0043101)	4/13	0.0230722	0.291278	4.5686	17.2196	ADAL;PNP;AMPD3;ADA
CvsSt	GO_Biological_Process_2021	regulation of T cell differentiation in thymus (GO:0033081)	4/13	0.0230722	0.291278	4.5686	17.2196	BMP4;SHH;ADAM8;TOX
CvsSt	GO_Biological_Process_2021	regulation of fat cell differentiation (GO:0045598)	13/80	0.0234491	0.293959	1.9983	7.49946	WNT10B;WNT5A;ADIRF;RORA;LRP3;GATA2;TNF;SULT1E1;BBS12;ALOX5;ZFPM1;ZNF385A;PPARD
CvsSt	GO_Biological_Process_2021	regulation of protein localization to plasma membrane (GO:1903076)	13/80	0.0234491	0.293959	1.9983	7.49946	LRRC15;LRP1;PRKCE;ZDHHC8;SORBS1;TNF;NKD2;CNPY4;AGR2;EPHB2;RHOQ;EPHA2;BCL2L1
CvsSt	GO_Biological_Process_2021	regulation of interleukin-17 production (GO:0032660)	7/33	0.0235585	0.293959	2.76962	10.3813	SLC7A5;IL15;TNFSF4;RFTN1;IL18;NR1H4;TLR4
CvsSt	GO_Biological_Process_2021	regulation of neurotransmitter secretion (GO:0046928)	7/33	0.0235585	0.293959	2.76962	10.3813	RIMS2;RIMS4;CAMK2A;SLC30A1;CPLX2;CPLX1;CPLX3
CvsSt	GO_Biological_Process_2021	myelination (GO:0042552)	9/48	0.023749	0.293959	2.37495	8.88283	NFASC;GAL3ST1;MARVELD1;AMIGO1;GPC1;EPB41L3;ACER3;PLP1;ABCD1
CvsSt	GO_Biological_Process_2021	lamellipodium assembly (GO:0030032)	6/26	0.0237827	0.293959	3.08542	11.5358	ABLIM1;GOLPH3;ABLIM3;KIT;SRGAP2;ARHGEF6
CvsSt	GO_Biological_Process_2021	membrane depolarization during action potential (GO:0086010)	6/26	0.0237827	0.293959	3.08542	11.5358	KCNH2;CACNA1I;SCN4A;CACNA1C;SCN4B;HCN2
CvsSt	GO_Biological_Process_2021	calcium ion homeostasis (GO:0055074)	15/97	0.0238063	0.293959	1.88453	7.04401	CCR1;SLC24A4;CCL23;CCL11;EDN3;STC1;SLC30A1;CDH5;STC2;TRPV5;ATP13A4;ATP13A5;ATP13A2;FAM20A;SLC24A5
CvsSt	GO_Biological_Process_2021	sterol homeostasis (GO:0055092)	12/72	0.0240233	0.295828	2.05941	7.67899	FABP3;NPC1;HNF4A;INSIG1;PLA2G10;IL18;RORA;APOA4;APOE;ABCD1;ABCG1;CES1
CvsSt	GO_Biological_Process_2021	positive regulation of protein serine/threonine kinase activity (GO:0071902)	16/106	0.024651	0.30273	1.83172	6.78274	SLC27A1;EDN3;DIRAS1;IL34;WNT5A;DIRAS2;TNF;PIK3R6;PIK3R5;ROBO1;IL1B;KIT;S100A12;ADAM8;FGFR1;LTF
CvsSt	GO_Biological_Process_2021	regulation of endothelial cell migration (GO:0010594)	14/89	0.0248205	0.303983	1.92271	7.1065	NRP2;SP100;ITGB3;WNT5A;STC1;EMP2;VASH1;NR2F2;BMP4;ADGRB1;ATOH8;KDR;APOE;EPHA2
CvsSt	GO_Biological_Process_2021	positive regulation of protein metabolic process (GO:0051247)	17/115	0.0252792	0.308763	1.78755	6.57421	UHRF1;PLK2;TNFSF12;WNT5A;IL18;ASB11;TNF;NKD1;SLC25A37;APC;IL1B;PLA2G10;ASB9;AGTR1;APOE;DTL;EIF4G1
CvsSt	GO_Biological_Process_2021	fatty acid metabolic process (GO:0006631)	18/124	0.0257234	0.309152	1.75008	6.40591	GGT5;FAAH;CPT1A;ACOT7;ALOX15;ACSM5;CEL;CPT1C;ALOX15B;ACACA;LIPH;ALOX5;ALOX5AP;GGT1;CRAT;LPIN3;CES1;PPARD
CvsSt	GO_Biological_Process_2021	hexose metabolic process (GO:0019318)	8/41	0.0257735	0.309152	2.49431	9.1252	KCNJ11;OAS1;PMM2;CHST15;CHST1;APOD;ALDOB;PPARD
CvsSt	GO_Biological_Process_2021	protein phosphorylation (GO:0006468)	57/496	0.026381	0.309152	1.34335	4.88322	MAST4;GMFG;LIPE;CDK20;KDR;PRKG2;NEK2;MAP3K6;EPHB2;JAK3;STK32C;CAMK1D;DAPK1;PRKCB;PRKCE;LMTK3;HUNK;VRK1;ERN1;MELK;PRKAR1B;KIT;SIK2;FAM20A;SGK2;TLR4;CAMK1G;CAMK2B;NIM1K;PXK;CCL11;PRKAA2;CAMK2A;TTK;WNT11;STK36;ERBB4;MKNK1;MKNK2;CCL2;FYN;MARK4;PAK5;MARK1;PRRT1;CDK18;SRMS;PLK2;MERTK;SMAD7;BMP4;CDK6;SBK1;AAK1;ATP13A2;CDK15;FGFR1
CvsSt	GO_Biological_Process_2021	granulocyte chemotaxis (GO:0071621)	12/73	0.0265066	0.309152	2.02554	7.35344	ADGRE2;CXCL10;CCL23;CXCL8;CCL11;CCL22;EDN3;PDE4B;CCL2;S100A12;S100A9;S100A8
CvsSt	GO_Biological_Process_2021	negative regulation of cell adhesion (GO:0007162)	12/73	0.0265066	0.309152	2.02554	7.35344	SEMA5A;RIPOR2;MUC1;PTPRC;MDK;ARHGDIB;SPOCK1;FBLN1;EPHB2;CORO2B;KNG1;JAM3
CvsSt	GO_Biological_Process_2021	oligosaccharide metabolic process (GO:0009311)	9/49	0.0268761	0.309152	2.31545	8.37387	NEU2;MANBA;ST8SIA1;MAN2B2;ST8SIA2;ST8SIA4;ST8SIA5;ST3GAL6;ST6GALNAC3
CvsSt	GO_Biological_Process_2021	chemical homeostasis (GO:0048878)	11/65	0.0270378	0.309152	2.09705	7.57145	SLC4A8;ACOXL;SLC4A9;VGF;HNF4A;RBP1;SLC4A1;APOA4;ATP13A2;CLN8;PNPLA1
CvsSt	GO_Biological_Process_2021	positive regulation of interferon-gamma production (GO:0032729)	10/57	0.0272168	0.309152	2.18995	7.8924	CD2;SLC7A5;IL1B;TNFSF4;CRTAM;PDE4B;IL18;TLR4;ZFPM1;IL12RB2
CvsSt	GO_Biological_Process_2021	renal system development (GO:0072001)	10/57	0.0272168	0.309152	2.18995	7.8924	BMP4;CENPF;FOXF1;SIX2;C1GALT1;AGTR1;HNF1B;SULF1;PCSK5;STRA6
CvsSt	GO_Biological_Process_2021	regulation of cell adhesion mediated by integrin (GO:0033628)	7/34	0.0274625	0.309152	2.6669	9.58732	DPP4;MUC1;TESC;ADAM9;ADA;JAM3;EPHA2
CvsSt	GO_Biological_Process_2021	cardiac ventricle development (GO:0003231)	5/20	0.027509	0.309152	3.42725	12.315	HEYL;PDE2A;HEY2;GATA4;STRA6
CvsSt	GO_Biological_Process_2021	cellular modified amino acid biosynthetic process (GO:0042398)	5/20	0.027509	0.309152	3.42725	12.315	SLC27A1;PLSCR1;CHAC1;HAGH;GGT1
CvsSt	GO_Biological_Process_2021	cortical actin cytoskeleton organization (GO:0030866)	5/20	0.027509	0.309152	3.42725	12.315	FHOD3;FMNL3;LCP1;TNF;RHOQ
CvsSt	GO_Biological_Process_2021	dopaminergic neuron differentiation (GO:0071542)	5/20	0.027509	0.309152	3.42725	12.315	SHH;LMX1A;CDNF;EN1;LRP6
CvsSt	GO_Biological_Process_2021	negative regulation of dephosphorylation (GO:0035305)	5/20	0.027509	0.309152	3.42725	12.315	PPP1R15A;PPP1R36;MFHAS1;PPP1R27;SH2D4A
CvsSt	GO_Biological_Process_2021	negative regulation of lipid storage (GO:0010888)	5/20	0.027509	0.309152	3.42725	12.315	ITGB3;TNF;ABCG1;CES1;PPARD
CvsSt	GO_Biological_Process_2021	negative regulation of osteoclast differentiation (GO:0045671)	5/20	0.027509	0.309152	3.42725	12.315	TMEM178A;LRRC17;TLR4;FBN1;LTF
CvsSt	GO_Biological_Process_2021	nucleobase-containing compound biosynthetic process (GO:0034654)	5/20	0.027509	0.309152	3.42725	12.315	ADAL;CDA;PNP;AMPD3;ADA
CvsSt	GO_Biological_Process_2021	positive regulation of alpha-beta T cell activation (GO:0046635)	5/20	0.027509	0.309152	3.42725	12.315	SHH;PNP;TNFSF4;HLA-DRA;HLA-E
CvsSt	GO_Biological_Process_2021	adenylate cyclase-inhibiting G protein-coupled acetylcholine receptor signaling pathway (GO:0007197)	3/8	0.0278491	0.309152	6.16548	22.0783	CHRM2;HRH3;OPRM1
CvsSt	GO_Biological_Process_2021	cellular response to angiotensin (GO:1904385)	3/8	0.0278491	0.309152	6.16548	22.0783	CA2;CAMK2A;AGTR1
CvsSt	GO_Biological_Process_2021	cellular response to potassium ion (GO:0035865)	3/8	0.0278491	0.309152	6.16548	22.0783	CRHBP;DLG2;DLG4
CvsSt	GO_Biological_Process_2021	collecting duct development (GO:0072044)	3/8	0.0278491	0.309152	6.16548	22.0783	BMP4;SHH;PTCH1
CvsSt	GO_Biological_Process_2021	leukocyte aggregation (GO:0070486)	3/8	0.0278491	0.309152	6.16548	22.0783	IL1B;S100A9;S100A8
CvsSt	GO_Biological_Process_2021	multi-ciliated epithelial cell differentiation (GO:1903251)	3/8	0.0278491	0.309152	6.16548	22.0783	MCIDAS;DEUP1;CCNO
CvsSt	GO_Biological_Process_2021	positive regulation of CD4-positive, alpha-beta T cell differentiation (GO:0043372)	3/8	0.0278491	0.309152	6.16548	22.0783	SOCS1;TNFSF4;HLA-DRA
CvsSt	GO_Biological_Process_2021	positive regulation of neuron projection arborization (GO:0150012)	3/8	0.0278491	0.309152	6.16548	22.0783	DLG4;WNT5A;DVL2
CvsSt	GO_Biological_Process_2021	pyrimidine nucleobase catabolic process (GO:0006208)	3/8	0.0278491	0.309152	6.16548	22.0783	DPYSL4;DPYSL2;DPYSL3
CvsSt	GO_Biological_Process_2021	regulation of alpha-beta T cell differentiation (GO:0046637)	3/8	0.0278491	0.309152	6.16548	22.0783	SHH;PNP;PRDM1
CvsSt	GO_Biological_Process_2021	regulation of anion transport (GO:0044070)	3/8	0.0278491	0.309152	6.16548	22.0783	CA2;STC1;CES1
CvsSt	GO_Biological_Process_2021	regulation of dendritic spine maintenance (GO:1902950)	3/8	0.0278491	0.309152	6.16548	22.0783	FYN;APOE;FCGR2B
CvsSt	GO_Biological_Process_2021	regulation of extent of cell growth (GO:0061387)	3/8	0.0278491	0.309152	6.16548	22.0783	OLFM1;NRCAM;APOE
CvsSt	GO_Biological_Process_2021	regulation of nitrogen compound metabolic process (GO:0051171)	3/8	0.0278491	0.309152	6.16548	22.0783	ABCA3;APOE;TNF
CvsSt	GO_Biological_Process_2021	regulation of osteoclast development (GO:2001204)	3/8	0.0278491	0.309152	6.16548	22.0783	TYROBP;FBN1;LTF
CvsSt	GO_Biological_Process_2021	response to hydroperoxide (GO:0033194)	3/8	0.0278491	0.309152	6.16548	22.0783	DAPK1;GPX3;APOA4
CvsSt	GO_Biological_Process_2021	response to potassium ion (GO:0035864)	3/8	0.0278491	0.309152	6.16548	22.0783	CRHBP;DLG2;DLG4
CvsSt	GO_Biological_Process_2021	T cell mediated cytotoxicity (GO:0001913)	3/8	0.0278491	0.309152	6.16548	22.0783	CRTAM;CTSH;EMP2
CvsSt	GO_Biological_Process_2021	regulation of vascular endothelial growth factor production (GO:0010574)	6/27	0.0283473	0.31391	2.93834	10.47	C3;IL1B;GATA4;RORA;HPSE;SULF1
CvsSt	GO_Biological_Process_2021	regulation of chemokine production (GO:0032642)	8/42	0.0294419	0.320498	2.42081	8.53419	EGR1;IL7;TNFSF4;WNT5A;IL18;TNF;ALOX15B;TLR4
CvsSt	GO_Biological_Process_2021	skeletal system morphogenesis (GO:0048705)	8/42	0.0294419	0.320498	2.42081	8.53419	CYP26B1;HOXA9;HHIP;RFLNB;LRP6;RFLNA;FGFR1;LTF
CvsSt	GO_Biological_Process_2021	positive regulation of transport (GO:0051050)	14/91	0.0294783	0.320498	1.87256	6.5991	C2CD5;CAMK1D;LRP1;AHSG;IL15;GATA2;MERTK;TNF;CDH3;CALY;IL1B;APOE;FCGR2B;SGK2
CvsSt	GO_Biological_Process_2021	negative regulation of cell migration (GO:0030336)	20/144	0.0298741	0.320498	1.6625	5.83665	NDRG4;LRP1;STC1;ATP1B2;PTPRK;SULF1;ALOX15B;SMAD7;PTPRG;ROBO1;GJA1;SHH;CLDN3;WNT11;NAV3;HAS1;ARHGDIB;DPYSL3;SRGAP2;PHLDB2
CvsSt	GO_Biological_Process_2021	cAMP metabolic process (GO:0046058)	4/14	0.0300801	0.320498	4.11151	14.4063	PTH;ADCY2;ADCY1;EPHA2
CvsSt	GO_Biological_Process_2021	cGMP-mediated signaling (GO:0019934)	4/14	0.0300801	0.320498	4.11151	14.4063	PDE2A;IRAG1;PDE3A;APOE
CvsSt	GO_Biological_Process_2021	defense response to protozoan (GO:0042832)	4/14	0.0300801	0.320498	4.11151	14.4063	BATF2;IRF4;GBP2;LYST
CvsSt	GO_Biological_Process_2021	ether lipid metabolic process (GO:0046485)	4/14	0.0300801	0.320498	4.11151	14.4063	LIPE;NCEH1;FAR1;PLA2G7
CvsSt	GO_Biological_Process_2021	low-density lipoprotein particle remodeling (GO:0034374)	4/14	0.0300801	0.320498	4.11151	14.4063	PLA2G10;AGTR1;PLA2G7;ABCG1
CvsSt	GO_Biological_Process_2021	negative regulation of T cell differentiation (GO:0045581)	4/14	0.0300801	0.320498	4.11151	14.4063	BMP4;MDK;IRF1;TNFSF4
CvsSt	GO_Biological_Process_2021	neurotransmitter biosynthetic process (GO:0042136)	4/14	0.0300801	0.320498	4.11151	14.4063	SLC5A7;DAGLA;PAH;DBH
CvsSt	GO_Biological_Process_2021	positive regulation of alpha-beta T cell differentiation (GO:0046638)	4/14	0.0300801	0.320498	4.11151	14.4063	SHH;PNP;SOCS1;TNFSF4
CvsSt	GO_Biological_Process_2021	positive regulation of transmembrane transport (GO:0034764)	4/14	0.0300801	0.320498	4.11151	14.4063	C3;C2CD5;CA2;AZIN2
CvsSt	GO_Biological_Process_2021	regulation of protein kinase C signaling (GO:0090036)	4/14	0.0300801	0.320498	4.11151	14.4063	DGKD;WNT11;SPHK2;WNT5A
CvsSt	GO_Biological_Process_2021	regulation of response to endoplasmic reticulum stress (GO:1905897)	4/14	0.0300801	0.320498	4.11151	14.4063	ALOX5;LPCAT3;NUPR1;FCGR2B
CvsSt	GO_Biological_Process_2021	secondary palate development (GO:0062009)	4/14	0.0300801	0.320498	4.11151	14.4063	WNT11;LEF1;WNT5A;LRRC32
CvsSt	GO_Biological_Process_2021	neuron migration (GO:0001764)	9/50	0.0302824	0.321225	2.25885	7.89963	SPOCK1;NRCAM;NAV1;CCK;CELSR1;ASTN2;ASTN1;MARK1;FGFR1
CvsSt	GO_Biological_Process_2021	negative regulation of hydrolase activity (GO:0051346)	10/58	0.0303621	0.321225	2.14421	7.49306	GPSM1;SERPINB3;PPP1R36;PPP1R27;SH2D4A;RASA4;CAMK2A;SH3BP4;FZD10;GNAT1
CvsSt	GO_Biological_Process_2021	regulation of calcium ion transport (GO:0051924)	10/58	0.0303621	0.321225	2.14421	7.49306	CAMK2B;CCR1;CD84;CRACR2A;CD4;GRAMD2A;CAMK2A;STC1;HOMER3;CASQ1
CvsSt	GO_Biological_Process_2021	epidermis development (GO:0008544)	13/83	0.0308087	0.324427	1.91234	6.65487	WNT10A;CALML5;KLK14;KRT32;KRT31;OVOL1;KRT85;FOXN1;EDAR;DCT;RBP2;FABP5;KRT15
CvsSt	GO_Biological_Process_2021	regulation of defense response (GO:0031347)	13/83	0.0308087	0.324427	1.91234	6.65487	AHSG;CMA1;WNT5A;ALOX15;IRF1;ALOX5;TNFSF4;DHX58;AGTR1;APOE;GGT1;FCGR2B;PTGES
CvsSt	GO_Biological_Process_2021	lipid transport (GO:0006869)	16/109	0.0311105	0.326639	1.77234	6.15038	SLC27A1;ABCA6;ABCA3;SLC10A2;SCP2D1;NR1H4;APOA4;CLN8;FABP3;FABP5;SLCO3A1;SLCO2A1;APOE;ABCD1;ABCG1;PPARD
CvsSt	GO_Biological_Process_2021	positive regulation of ERK1 and ERK2 cascade (GO:0070374)	23/172	0.0311637	0.326639	1.59161	5.52052	CCR1;NDRG4;CCL23;CCL11;CCL22;ALOX15;C5AR1;GATA4;OPRM1;TNF;MT3;MARCO;MFHAS1;CD4;PTPRC;GPNMB;GLIPR2;ERBB4;KDR;CCL2;ROR1;ALKAL2;APOE
CvsSt	GO_Biological_Process_2021	negative regulation of epithelial cell migration (GO:0010633)	7/35	0.031783	0.330822	2.57151	8.86868	SP100;ADGRB1;STC1;APOE;NR2F2;VASH1;PTPRG
CvsSt	GO_Biological_Process_2021	regulation of regulated secretory pathway (GO:1903305)	7/35	0.031783	0.330822	2.57151	8.86868	RIMS2;RIMS4;SYT12;RAB15;SYT7;SYT17;SYT6
CvsSt	GO_Biological_Process_2021	semaphorin-plexin signaling pathway (GO:0071526)	7/35	0.031783	0.330822	2.57151	8.86868	SEMA5A;SEMA4A;NRP2;SEMA6D;SEMA3B;SEMA4F;SEMA3F
CvsSt	GO_Biological_Process_2021	positive regulation of immune response (GO:0050778)	12/75	0.0320249	0.332572	1.96102	6.74834	IL10;PLSCR1;HLA-DMB;PTPRC;IL15;SPHK2;TNFSF4;HLA-DRA;ADAM8;NMI;FCGR2B;CD177
CvsSt	GO_Biological_Process_2021	negative regulation of cytokine production (GO:0001818)	24/182	0.0325862	0.336589	1.56633	5.36289	IL10;SRGN;MAPKBP1;CD84;C5AR2;LEF1;NLRC5;NR1H4;TNF;C1QTNF3;TYROBP;PTPRC;NAV3;GPNMB;TNFSF4;DHX58;HOMER3;APOD;BPI;FCGR2B;ZFPM1;ABCD1;JAK3;TLR4
CvsSt	GO_Biological_Process_2021	positive regulation of protein localization to membrane (GO:1905477)	15/101	0.0329168	0.336589	1.79648	6.13278	C2CD5;PPP1R13B;LRP1;MTCL1;PRKCE;ZDHHC8;SORBS1;TNF;NKD2;CNPY4;AGR2;PMAIP1;FYN;EPHB2;EPHA2
CvsSt	GO_Biological_Process_2021	positive regulation of cytokine production (GO:0001819)	40/335	0.0334314	0.336589	1.40037	4.75884	GATA4;RORA;TNF;AGPAT2;C3;C1QTNF3;PNP;MDK;DHX58;PLCG2;PDE4B;IL12RB2;IL10;EGR1;IL15;SPHK2;RFTN1;WNT5A;CRTAM;IL18;NR1H4;SULF1;POU2F2;ALOX15B;HLA-E;CD2;SLC7A5;CD4;TYROBP;PTPRC;IL7;IRF4;TNFSF4;IL1B;IRF1;POU2AF1;HPSE;ZFPM1;TLR4;CARD11
CvsSt	GO_Biological_Process_2021	protein localization to cell surface (GO:0034394)	6/28	0.0334529	0.336589	2.80462	9.52903	PRRT1;WNT11;EMP2;PTPRK;CD177;JAM3
CvsSt	GO_Biological_Process_2021	regulation of extrinsic apoptotic signaling pathway in absence of ligand (GO:2001239)	6/28	0.0334529	0.336589	2.80462	9.52903	PPP2R1B;UNC5B;IL1B;TNF;BCL2L1;FGFR1
CvsSt	GO_Biological_Process_2021	regulation of reactive oxygen species biosynthetic process (GO:1903426)	6/28	0.0334529	0.336589	2.80462	9.52903	SPHK2;ALOX5;ADGRB1;PLCG2;ABCD1;TLR4
CvsSt	GO_Biological_Process_2021	sarcomere organization (GO:0045214)	6/28	0.0334529	0.336589	2.80462	9.52903	FHOD3;ACTN2;CASQ1;MYOM2;MYPN;LMOD2
CvsSt	GO_Biological_Process_2021	ventricular septum morphogenesis (GO:0060412)	6/28	0.0334529	0.336589	2.80462	9.52903	BMP4;HEYL;HEY2;ZFPM1;ROBO1;SMAD7
CvsSt	GO_Biological_Process_2021	lipid modification (GO:0030258)	8/43	0.033454	0.336589	2.35152	7.98948	DGKD;ALOX5;LPCAT3;ALOX15;CYP2E1;PLA2G7;ALOX15B;DGKI
CvsSt	GO_Biological_Process_2021	myofibril assembly (GO:0030239)	8/43	0.033454	0.336589	2.35152	7.98948	FHOD3;ACTC1;ACTN2;LMOD1;CASQ1;MYOM2;MYPN;LMOD2
CvsSt	GO_Biological_Process_2021	positive regulation of neuron differentiation (GO:0045666)	8/43	0.033454	0.336589	2.35152	7.98948	HEYL;DLX2;NRCAM;MMD2;KCTD11;ADRA2B;BEND6;FGFR1
CvsSt	GO_Biological_Process_2021	endocardial cushion development (GO:0003197)	5/21	0.0335406	0.336589	3.21287	10.9077	BMP4;HEYL;FOXF1;NOS3;GATA4
CvsSt	GO_Biological_Process_2021	intracellular lipid transport (GO:0032365)	5/21	0.0335406	0.336589	3.21287	10.9077	CPT1A;FABP3;PRKAA2;ABCD1;ACACA
CvsSt	GO_Biological_Process_2021	negative regulation of cell communication (GO:0010648)	5/21	0.0335406	0.336589	3.21287	10.9077	SRMS;KIF26A;HHIP;IL1B;OPRM1
CvsSt	GO_Biological_Process_2021	purinergic nucleotide receptor signaling pathway (GO:0035590)	5/21	0.0335406	0.336589	3.21287	10.9077	C3;NT5E;PSTPIP1;IL1B;IL18
CvsSt	GO_Biological_Process_2021	chemical synaptic transmission (GO:0007268)	37/306	0.0336067	0.336589	1.42015	4.81862	CHRM2;GRIA1;NLGN3;GRIA2;SNAP25;CHRNA4;GRIK4;DBH;CPLX1;CAMKK1;LRP6;CRHBP;GRM4;GALR3;PTCHD1;HRH3;PRKACG;SNCG;APOE;NPTX1;ASIC2;NPTX2;ERC2;GABRP;DTNA;CEL;FCHSD1;SLC5A7;CORT;DLG2;PRKAR1B;DLG4;PLP1;CRH;MYCBPAP;PDE7B;KCNK3
CvsSt	GO_Biological_Process_2021	sensory perception (GO:0007600)	9/51	0.0339783	0.339557	2.20495	7.45721	USH1G;CHRNA4;WHRN;C5AR1;TRPV2;CCL2;MYO7A;OPRM1;PTGES
CvsSt	GO_Biological_Process_2021	regulation of inflammatory response to antigenic stimulus (GO:0002861)	19/137	0.0340776	0.339795	1.65929	5.60693	GGT5;GLP1R;IL10;VIPR1;GPR15;PTH;PLK2;SCTR;GPR83;PTH2R;ADCY2;ADCY1;PRKAR1B;PRKACG;PLCG2;CRH;FYN;GGT1;RAMP1
CvsSt	GO_Biological_Process_2021	neuron differentiation (GO:0030182)	23/174	0.0349884	0.348107	1.57036	5.26501	WNT10B;EMX1;WNT10A;TENM2;CDNF;WNT5A;EN1;WNT8B;FZD10;RORB;MYO7A;VXN;RUNX2;LRP6;PTPRD;WNT6;SHH;WNT11;LMX1A;ATOH8;LHX6;SPOCK1;WNT3
CvsSt	GO_Biological_Process_2021	cellular divalent inorganic cation homeostasis (GO:0072503)	16/111	0.0360592	0.352605	1.73483	5.76414	CCR1;SLC24A4;CCL23;CCL11;EDN3;STC1;SLC30A1;MT4;MT3;CDH5;STC2;ATP13A4;MT1G;ATP13A5;ATP13A2;SLC24A5
CvsSt	GO_Biological_Process_2021	cytoskeleton organization (GO:0007010)	17/120	0.0363389	0.352605	1.70031	5.6363	ZRANB1;CCL11;MAST4;ARAP3;RHOC;ANK1;SYNE3;FMNL3;MDK;DPYSL2;EPB41L3;KRT25;RANBP10;CCL2;APOE;PAK5;MARK1
CvsSt	GO_Biological_Process_2021	apoptotic process (GO:0006915)	29/231	0.0363528	0.352605	1.48101	4.90877	CYFIP2;PPP1R15A;PDE1B;HK2;ATCAY;PMAIP1;IFT57;PAK5;BCL2L14;ZNF385A;PLK3;DAPK1;PRKCE;TNFSF12;MAGI3;TNFRSF19;MX1;TNFRSF10A;ALOX15B;CD2;PLSCR1;MELK;FAP;IL1B;IRF1;FAS;ARHGEF6;PPARD;BCL2L1
CvsSt	GO_Biological_Process_2021	macrophage activation (GO:0042116)	7/36	0.0365354	0.352605	2.4827	8.21643	C1QA;CD93;C5AR1;PLCG2;NMI;TNF;TLR4
CvsSt	GO_Biological_Process_2021	regulation of microtubule-based process (GO:0032886)	7/36	0.0365354	0.352605	2.4827	8.21643	PRKAA2;APC;MAP6;TRIM36;MARK4;BICD1;PHLDB2
CvsSt	GO_Biological_Process_2021	Wnt signaling pathway, calcium modulating pathway (GO:0007223)	7/36	0.0365354	0.352605	2.4827	8.21643	PPP3CA;WNT11;CAMK2A;LEF1;WNT5A;PDE6B;TNRC6B
CvsSt	GO_Biological_Process_2021	B cell activation (GO:0042113)	13/85	0.0365633	0.352605	1.85902	6.15094	IL10;ITGA4;PRKCB;CHRNA4;CTPS1;IFNW1;PTPRC;BANK1;IFNE;KIT;PLCG2;EPHB2;JAK3
CvsSt	GO_Biological_Process_2021	negative regulation of macromolecule metabolic process (GO:0010605)	25/194	0.0377428	0.352605	1.52533	4.99846	CXCL8;PRKAA2;PTH;LRP3;GATA2;TNF;ROBO1;STC2;HEY2;ATOH8;KDR;APOE;XDH;STOX1;CCR1;APOBEC1;TET1;PARP14;BMP4;SLC7A5;OLFM1;CLDN3;MYCN;DLG4;TNRC6B
CvsSt	GO_Biological_Process_2021	neurogenesis (GO:0022008)	8/44	0.0378217	0.352605	2.28607	7.4866	DAGLA;CDK6;NTN5;SPOCK1;DCHS1;CHAC1;VXN;TRAK2
CvsSt	GO_Biological_Process_2021	positive regulation of biosynthetic process (GO:0009891)	8/44	0.0378217	0.352605	2.28607	7.4866	BMP4;CXCL8;ADGRB1;PLCG2;APOA4;APOE;SORBS1;TLR4
CvsSt	GO_Biological_Process_2021	regulation of endothelial cell apoptotic process (GO:2000351)	8/44	0.0378217	0.352605	2.28607	7.4866	SEMA5A;IL10;CDH5;ITGA4;KDR;CCL2;GATA2;TNF
CvsSt	GO_Biological_Process_2021	amide biosynthetic process (GO:0043604)	9/52	0.0379736	0.352605	2.15355	7.04398	ASAH2;ASL;NAGS;CLN8;PCSK5;ASS1;NMRAL1;PNPLA1;RHD
CvsSt	GO_Biological_Process_2021	catecholamine metabolic process (GO:0006584)	4/15	0.0382084	0.352605	3.73753	12.2019	DDC;RNF180;PAH;DBH
CvsSt	GO_Biological_Process_2021	detection of mechanical stimulus involved in sensory perception (GO:0050974)	4/15	0.0382084	0.352605	3.73753	12.2019	WHRN;KIT;PIEZO2;TMC2
CvsSt	GO_Biological_Process_2021	fatty acid beta-oxidation using acyl-CoA oxidase (GO:0033540)	4/15	0.0382084	0.352605	3.73753	12.2019	ACOXL;ECI2;ABCD1;CRAT
CvsSt	GO_Biological_Process_2021	G protein-coupled glutamate receptor signaling pathway (GO:0007216)	4/15	0.0382084	0.352605	3.73753	12.2019	TRPM1;DAGLA;GRM4;HOMER3
CvsSt	GO_Biological_Process_2021	lipoxygenase pathway (GO:0019372)	4/15	0.0382084	0.352605	3.73753	12.2019	ALOX5;ALOX15;ALOX5AP;ALOX15B
CvsSt	GO_Biological_Process_2021	macrophage differentiation (GO:0030225)	4/15	0.0382084	0.352605	3.73753	12.2019	BMP4;CD4;IL15;MMP9
CvsSt	GO_Biological_Process_2021	peptidyl-arginine modification (GO:0018195)	4/15	0.0382084	0.352605	3.73753	12.2019	PADI3;PADI2;PADI4;PADI1
CvsSt	GO_Biological_Process_2021	positive regulation of DNA damage response, signal transduction by p53 class mediator (GO:0043517)	4/15	0.0382084	0.352605	3.73753	12.2019	SPRED2;PMAIP1;MSX1;ZNF385A
CvsSt	GO_Biological_Process_2021	regulation of extracellular matrix organization (GO:1903053)	4/15	0.0382084	0.352605	3.73753	12.2019	LRP1;ANGPTL7;FAP;AEBP1
CvsSt	GO_Biological_Process_2021	T cell proliferation (GO:0042098)	4/15	0.0382084	0.352605	3.73753	12.2019	LMBR1L;TNFSF18;CRTAM;CTPS1
CvsSt	GO_Biological_Process_2021	neutrophil migration (GO:1990266)	12/77	0.0383204	0.352605	1.90047	6.19891	CXCL10;CCL23;CXCL8;CCL11;CCL22;EDN3;PDE4B;CCL2;S100A12;S100A9;S100A8;CD177
CvsSt	GO_Biological_Process_2021	cellular response to organonitrogen compound (GO:0071417)	15/103	0.038322	0.352605	1.75546	5.72584	EGR1;HCN3;KCNE1;PDE2A;NR1H4;RYR3;CRHBP;CPEB1;GOLPH3;PDE3A;SH3BP4;SLC26A3;CFTR;HCN2;HCN1
CvsSt	GO_Biological_Process_2021	actin-mediated cell contraction (GO:0070252)	3/9	0.0390633	0.352605	5.13762	16.6591	ACTC1;CCDC88C;EMP2
CvsSt	GO_Biological_Process_2021	cellular response to forskolin (GO:1904322)	3/9	0.0390633	0.352605	5.13762	16.6591	ADCY2;ADCY1;CFTR
CvsSt	GO_Biological_Process_2021	cholesterol catabolic process (GO:0006707)	3/9	0.0390633	0.352605	5.13762	16.6591	APOE;CEL;MT3
CvsSt	GO_Biological_Process_2021	detection of mechanical stimulus involved in sensory perception of sound (GO:0050910)	3/9	0.0390633	0.352605	5.13762	16.6591	WHRN;KIT;TMC2
CvsSt	GO_Biological_Process_2021	epithelial to mesenchymal transition involved in endocardial cushion formation (GO:0003198)	3/9	0.0390633	0.352605	5.13762	16.6591	BMP4;HEYL;HEY2
CvsSt	GO_Biological_Process_2021	hepoxilin biosynthetic process (GO:0051122)	3/9	0.0390633	0.352605	5.13762	16.6591	ALOX5;ALOX15;ALOX15B
CvsSt	GO_Biological_Process_2021	hepoxilin metabolic process (GO:0051121)	3/9	0.0390633	0.352605	5.13762	16.6591	ALOX5;ALOX15;ALOX15B
CvsSt	GO_Biological_Process_2021	kinetochore assembly (GO:0051382)	3/9	0.0390633	0.352605	5.13762	16.6591	CENPF;CENPA;DLGAP5
CvsSt	GO_Biological_Process_2021	negative regulation of production of molecular mediator of immune response (GO:0002701)	3/9	0.0390633	0.352605	5.13762	16.6591	IL10;FCGR2B;TNF
CvsSt	GO_Biological_Process_2021	oligosaccharide catabolic process (GO:0009313)	3/9	0.0390633	0.352605	5.13762	16.6591	NEU2;MANBA;MAN2B2
CvsSt	GO_Biological_Process_2021	one-carbon compound transport (GO:0019755)	3/9	0.0390633	0.352605	5.13762	16.6591	SLC14A1;CA2;AQP5
CvsSt	GO_Biological_Process_2021	organic acid catabolic process (GO:0016054)	3/9	0.0390633	0.352605	5.13762	16.6591	MPST;TST;CTH
CvsSt	GO_Biological_Process_2021	ornithine metabolic process (GO:0006591)	3/9	0.0390633	0.352605	5.13762	16.6591	HNF4A;AZIN2;ASL
CvsSt	GO_Biological_Process_2021	positive regulation of cholesterol esterification (GO:0010873)	3/9	0.0390633	0.352605	5.13762	16.6591	AGTR1;APOA4;APOE
CvsSt	GO_Biological_Process_2021	positive regulation of protein kinase C signaling (GO:0090037)	3/9	0.0390633	0.352605	5.13762	16.6591	WNT11;SPHK2;WNT5A
CvsSt	GO_Biological_Process_2021	protein O-linked glycosylation via threonine (GO:0018243)	3/9	0.0390633	0.352605	5.13762	16.6591	GALNT16;GALNT3;GALNT1
CvsSt	GO_Biological_Process_2021	regulation of CD8-positive, alpha-beta T cell activation (GO:2001185)	3/9	0.0390633	0.352605	5.13762	16.6591	IRF1;CRTAM;HLA-E
CvsSt	GO_Biological_Process_2021	regulation of cell adhesion molecule production (GO:0060353)	3/9	0.0390633	0.352605	5.13762	16.6591	COLEC12;CXCL8;IL1B
CvsSt	GO_Biological_Process_2021	response to forskolin (GO:1904321)	3/9	0.0390633	0.352605	5.13762	16.6591	ADCY2;ADCY1;CFTR
CvsSt	GO_Biological_Process_2021	sterol catabolic process (GO:0016127)	3/9	0.0390633	0.352605	5.13762	16.6591	APOE;CEL;MT3
CvsSt	GO_Biological_Process_2021	T-helper 1 type immune response (GO:0042088)	3/9	0.0390633	0.352605	5.13762	16.6591	LEF1;IL18;TLR4
CvsSt	GO_Biological_Process_2021	unsaturated fatty acid biosynthetic process (GO:0006636)	3/9	0.0390633	0.352605	5.13762	16.6591	ALOX15;ALOX15B;FADS1
CvsSt	GO_Biological_Process_2021	negative regulation of myeloid leukocyte differentiation (GO:0002762)	6/29	0.0391175	0.352605	2.68254	8.69459	CDK6;TMEM178A;LRRC17;TLR4;ZFPM1;FBN1
CvsSt	GO_Biological_Process_2021	regulation of neuron death (GO:1901214)	13/86	0.0397108	0.357238	1.83345	5.91495	C1QA;EGR1;CTSZ;WNT5A;KIF14;GRM4;TYROBP;GPNMB;SNCG;FYN;ATP13A2;FCGR2B;EIF4G1
CvsSt	GO_Biological_Process_2021	limb morphogenesis (GO:0035108)	5/22	0.0403309	0.359943	3.02372	9.70806	CYP26B1;SHH;PTCH1;PCSK5;LRP6
CvsSt	GO_Biological_Process_2021	negative regulation of B cell activation (GO:0050869)	5/22	0.0403309	0.359943	3.02372	9.70806	IL10;TYROBP;BANK1;RC3H1;FCGR2B
CvsSt	GO_Biological_Process_2021	negative regulation of biomineral tissue development (GO:0070168)	5/22	0.0403309	0.359943	3.02372	9.70806	CCR1;SRGN;AHSG;NOS3;HEY2
CvsSt	GO_Biological_Process_2021	positive regulation of granulocyte chemotaxis (GO:0071624)	5/22	0.0403309	0.359943	3.02372	9.70806	RIPOR2;CAMK1D;CXCL8;MDK;THBS4
CvsSt	GO_Biological_Process_2021	phagocytosis, engulfment (GO:0006911)	7/37	0.041733	0.37172	2.39981	7.62292	MARCO;BIN2;ADGRB1;HAVCR1;FCGR2B;ARHGAP25;GULP1
CvsSt	GO_Biological_Process_2021	regulation of immune effector process (GO:0002697)	9/53	0.042277	0.375824	2.10449	6.65758	C3;C1QA;IRF4;C5AR2;C5AR1;HLA-DRA;CD59;C8B;FCGR2B
CvsSt	GO_Biological_Process_2021	regulation of pri-miRNA transcription by RNA polymerase II (GO:1902893)	8/45	0.0425556	0.377555	2.22417	7.02157	IL10;BMP4;EGR1;ATOH8;GATA2;TNF;NFATC4;PPARD
CvsSt	GO_Biological_Process_2021	response to lipopolysaccharide (GO:0032496)	21/159	0.0427658	0.378675	1.56822	4.94304	GGT5;IL10;CXCL8;CITED1;NOS3;WNT5A;PALM3;LY96;CXCL10;SLPI;TNFSF4;IL1B;TNIP3;PDE4B;ADAM9;CCL2;GGT1;S100A9;TLR4;S100A8;IFNAR1
CvsSt	GO_Biological_Process_2021	neutrophil chemotaxis (GO:0030593)	11/70	0.0437398	0.38654	1.91881	6.0049	CXCL10;CCL23;CXCL8;CCL11;CCL22;EDN3;PDE4B;CCL2;S100A12;S100A9;S100A8
CvsSt	GO_Biological_Process_2021	positive regulation of epithelial cell proliferation (GO:0050679)	17/123	0.0444707	0.39223	1.65191	5.14228	SEMA5A;NRP2;EGFL7;EGR3;CCL11;TNFSF12;ITGB3;WNT5A;C5AR1;MST1;VEGFD;THBS4;BMP4;CRNN;CDH3;MDK;KDR
CvsSt	GO_Biological_Process_2021	artery morphogenesis (GO:0048844)	6/30	0.0453557	0.394379	2.57062	7.9515	BMP4;LRP1;FOXF1;HEY2;STRA6;SMAD7
CvsSt	GO_Biological_Process_2021	heterotypic cell-cell adhesion (GO:0034113)	6/30	0.0453557	0.394379	2.57062	7.9515	CD2;ITGA4;RNASE10;ITGB3;ITGA7;JAM3
CvsSt	GO_Biological_Process_2021	plasma membrane invagination (GO:0099024)	6/30	0.0453557	0.394379	2.57062	7.9515	MARCO;BIN2;HAVCR1;FCGR2B;ARHGAP25;GULP1
CvsSt	GO_Biological_Process_2021	regulation of catecholamine secretion (GO:0050433)	6/30	0.0453557	0.394379	2.57062	7.9515	HRH3;SYT12;CHRNA4;SYT7;SYT17;SYT6
CvsSt	GO_Biological_Process_2021	regulation of long-term synaptic potentiation (GO:1900271)	6/30	0.0453557	0.394379	2.57062	7.9515	SCGN;TYROBP;ADCY1;APOE;EPHB2;SHISA7
CvsSt	GO_Biological_Process_2021	regulation of macrophage activation (GO:0043030)	6/30	0.0453557	0.394379	2.57062	7.9515	MFHAS1;WNT5A;PLA2G10;BPI;FCGR2B;TLR4
CvsSt	GO_Biological_Process_2021	respiratory tube development (GO:0030323)	6/30	0.0453557	0.394379	2.57062	7.9515	BMP4;SHH;FOXF1;ABCA3;PCSK5;STRA6
CvsSt	GO_Biological_Process_2021	axon development (GO:0061564)	12/79	0.0454388	0.394379	1.84354	5.69909	SEMA5A;ACTBL2;AMIGO1;SLITRK4;ADGRB1;MAP1A;SLITRK6;PLP1;NRCAM;CCK;NREP;EPHB2
CvsSt	GO_Biological_Process_2021	regulation of neurogenesis (GO:0050767)	10/62	0.0455019	0.394379	1.97883	6.11459	HES6;HEYL;CCL11;SERPINF1;IL1B;HEY2;OPRM1;TNF;B2M;WNT3
CvsSt	GO_Biological_Process_2021	negative regulation of endothelial cell migration (GO:0010596)	7/38	0.0473868	0.398266	2.32227	7.08156	SP100;ADGRB1;STC1;APOE;NR2F2;VASH1;TNF
CvsSt	GO_Biological_Process_2021	ceramide catabolic process (GO:0046514)	4/16	0.047468	0.398266	3.42588	10.4411	NEU2;ASAH2;HEXB;ACER3
CvsSt	GO_Biological_Process_2021	dendrite self-avoidance (GO:0070593)	4/16	0.047468	0.398266	3.42588	10.4411	NEXN;EMB;IGSF9;MYPN
CvsSt	GO_Biological_Process_2021	digestive tract morphogenesis (GO:0048546)	4/16	0.047468	0.398266	3.42588	10.4411	FOXF1;SIX2;AGR2;STRA6
CvsSt	GO_Biological_Process_2021	membrane repolarization (GO:0086009)	4/16	0.047468	0.398266	3.42588	10.4411	KCNH2;KCNE1;KCNE4;ATP1B2
CvsSt	GO_Biological_Process_2021	mesenchyme development (GO:0060485)	4/16	0.047468	0.398266	3.42588	10.4411	BMP4;WNT11;FOXF1;GATA4
CvsSt	GO_Biological_Process_2021	neuron cell-cell adhesion (GO:0007158)	4/16	0.047468	0.398266	3.42588	10.4411	NLGN3;CEL;ASTN2;ASTN1
CvsSt	GO_Biological_Process_2021	neutrophil activation (GO:0042119)	4/16	0.047468	0.398266	3.42588	10.4411	CXCL8;TYROBP;IL15;DNASE1L3
CvsSt	GO_Biological_Process_2021	positive regulation of small molecule metabolic process (GO:0062013)	4/16	0.047468	0.398266	3.42588	10.4411	PRKCE;PMAIP1;CES1;PPARD
CvsSt	GO_Biological_Process_2021	regulation of ceramide biosynthetic process (GO:2000303)	4/16	0.047468	0.398266	3.42588	10.4411	SMPD3;SPHK2;TNF;NSMAF
CvsSt	GO_Biological_Process_2021	regulation of neurotransmitter transport (GO:0051588)	4/16	0.047468	0.398266	3.42588	10.4411	CAMK2A;CPLX2;CPLX1;CPLX3
CvsSt	GO_Biological_Process_2021	regulation of systemic arterial blood pressure by hormone (GO:0001990)	4/16	0.047468	0.398266	3.42588	10.4411	EDN3;NOS3;RASL10B;AGTR1
CvsSt	GO_Biological_Process_2021	cholesterol homeostasis (GO:0042632)	11/71	0.0477777	0.398266	1.88672	5.7379	FABP3;NPC1;HNF4A;INSIG1;PLA2G10;IL18;RORA;APOA4;APOE;ABCG1;CES1
CvsSt	GO_Biological_Process_2021	myeloid leukocyte differentiation (GO:0002573)	11/71	0.0477777	0.398266	1.88672	5.7379	BMP4;BATF2;CD4;TYROBP;IL15;PDE1B;KIT;LEF1;MT1G;MMP9;EPHA2
CvsSt	GO_Biological_Process_2021	regulation of G1/S transition of mitotic cell cycle (GO:2000045)	11/71	0.0477777	0.398266	1.88672	5.7379	SLFN11;CDKN2C;PLK5;CDK6;GPNMB;APC;KIF14;CCL2;E2F7;MYO16;EIF4G1
CvsSt	GO_Biological_Process_2021	blood vessel endothelial cell migration (GO:0043534)	5/23	0.0478944	0.398266	2.85557	8.6774	CDH5;EGR3;KDR;EMP2;ROBO1
CvsSt	GO_Biological_Process_2021	cilium-dependent cell motility (GO:0060285)	5/23	0.0478944	0.398266	2.85557	8.6774	DNAH2;DNAH17;EFHC2;TEKT5;DRC1
CvsSt	GO_Biological_Process_2021	diacylglycerol metabolic process (GO:0046339)	5/23	0.0478944	0.398266	2.85557	8.6774	LIPE;DAGLA;DGKD;MOGAT2;DGKI
CvsSt	GO_Biological_Process_2021	hyaluronan metabolic process (GO:0030212)	5/23	0.0478944	0.398266	2.85557	8.6774	HEXB;HAS1;IL1B;STAB2;SPAM1
CvsSt	GO_Biological_Process_2021	negative regulation of G protein-coupled receptor signaling pathway (GO:0045744)	5/23	0.0478944	0.398266	2.85557	8.6774	CXCL8;APLP1;KLK14;BICD1;ADA
CvsSt	GO_Biological_Process_2021	positive regulation of interleukin-17 production (GO:0032740)	5/23	0.0478944	0.398266	2.85557	8.6774	SLC7A5;IL15;RFTN1;IL18;NR1H4
CvsSt	GO_Biological_Process_2021	regulation of steroid metabolic process (GO:0019218)	5/23	0.0478944	0.398266	2.85557	8.6774	ACADVL;NR1H4;RORA;APOE;ABCG1
CvsSt	GO_Biological_Process_2021	actin filament organization (GO:0007015)	20/152	0.0487078	0.404283	1.56105	4.71738	FHOD3;GAS2L3;LMOD1;SHROOM2;RFLNB;EMP2;MYO7A;RHOC;ARHGAP25;TRIOBP;LMOD2;RFLNA;ACTC1;KASH5;DPYSL3;MYO5C;NRAP;CDC42EP2;LCP1;GAS2L2
CvsSt	GO_Biological_Process_2021	positive regulation of multicellular organismal process (GO:0051240)	40/345	0.0492926	0.40711	1.35371	4.07463	SLC27A1;LRP1;TGFB1I1;LEF1;DBH;TNF;AGPAT2;LOXL2;PLAC8;C1QTNF3;GJA1;SHH;GLIPR2;MDK;APOE;SOX6;IL10;SERPINB3;IL15;ELOVL3;MST1;WNT5A;CRTAM;IL18;TRPV2;PTH2R;AXIN2;COL1A1;BMP4;OLFM1;FABP4;BMP1;FABP5;APC;BAMBI;IRF4;TNFSF4;IL1B;LCN2;CRH
CvsSt	GO_Biological_Process_2021	neutrophil activation involved in immune response (GO:0002283)	54/485	0.0493064	0.40711	1.29459	3.89633	ARHGAP9;CDA;SNAP25;CALML5;GMFG;HEXB;CRISP3;CTSZ;SLC2A5;FCGR3B;PNP;ANPEP;CTSH;ACP3;B2M;CAMP;CD177;SERPINB3;CD53;MANBA;CD93;AHSG;RNASET2;CYBB;AMPD3;MMP9;TYROBP;BIN2;SLPI;CRISPLD2;PADI2;ADAM8;BPI;S100A9;DNASE1L3;S100A8;LTF;FGL2;C5AR1;AGPAT2;C3;PLAC8;CRACR2A;ALOX5;S100A12;CD59;PRDX6;NFASC;PTPRC;FABP5;QPCT;LCN2;CYSTM1;HPSE
CvsSt	GO_Biological_Process_2021	positive regulation of cell adhesion (GO:0045785)	12/80	0.0493193	0.40711	1.81633	5.46612	TNFSF18;PPP3CA;MDK;RNASE10;ALOX15;AGR2;ADAM9;ADAM8;RELL2;TNF;FBLN2;SMAD7
CvsSt	GO_Biological_Process_2021	negative regulation of peptidase activity (GO:0010466)	10/63	0.0499628	0.409892	1.94139	5.81732	SERPINB3;SERPINB13;LRP1;AHSG;SERPINC1;SERPINF1;FETUB;SPOCK1;SERPINB7;KNG1
CvsSt	GO_Biological_Process_2021	organonitrogen compound catabolic process (GO:1901565)	10/63	0.0499628	0.409892	1.94139	5.81732	MPST;LRSAM1;ADAMTS13;TST;CYP2D6;ANPEP;CTH;PLA2G10;CLN8;PLA2G7
CvsSt	Human_Phenotype_Ontology	Photophobia (HP:0000613)	28/147	8.74339e-05	0.124069	2.43707	22.7735	CERKL;GUCY2D;GUCA1B;CACNA1F;TNF;LYST;RLBP1;EDNRA;RDH12;CA4;NEK2;LRAT;PDE6B;RGS9;IL12RB2;IL10;SEMA4A;SLC6A19;WNT10A;CTNS;TYR;MERTK;GPR143;ADAM9;AIPL1;TLR4;SLC24A5;PLCD1
CvsSt	Human_Phenotype_Ontology	Protrusio acetabuli (HP:0003179)	5/9	0.000509872	0.361754	12.86	97.4959	COL1A1;FKBP10;SERPINF1;HSPG2;FBN1
CvsSt	Human_Phenotype_Ontology	Autosomal dominant inheritance (HP:0000006)	131/1134	0.00097944	0.396235	1.3673	9.47336	STEAP3;GUCA1B;SLC4A1;AQP5;TNF;GJA1;EDNRA;SYNGAP1;EDNRB;TUBB3;KDR;PIEZO2;TGM6;GNAT1;GJA8;LZTS1;CDON;KCNH2;KIRREL3;SLC6A19;MSX2;ACTN2;WNT5A;HNF1B;MYO7A;CEL;ANK1;KRT74;FOXP2;RUNX2;EDAR;SLC5A7;SCNN1G;MAF;MYCN;PAPPA;KCNQ4;CARD11;EPHA2;CES1;FLG;KCNE1;BEAN1;DLX3;CHRNA4;GATA4;FBLN1;CACNA1C;GATA2;APCDD1;HSD11B1;HESX1;PLCG2;CACNA1S;PI3;ZNF423;A2M;WNT10A;DTNA;PTCH1;PTCH2;TRPV3;TYR;ZFHX4;COL1A1;BMP4;SLC2A9;G…
CvsSt	Human_Phenotype_Ontology	Prenatal maternal abnormality (HP:0002686)	9/31	0.00111694	0.396235	4.21408	28.6438	SHH;GJA1;CPT1A;POR;PAH;HESX1;STOX1;F5;FGFR1
CvsSt	Human_Phenotype_Ontology	Torticollis (HP:0000473)	7/22	0.00221996	0.463231	4.80358	29.3511	SYNGAP1;COL6A2;COL6A1;COL6A3;ATP13A2;TGM6;ANO3
CvsSt	Human_Phenotype_Ontology	Midface retrusion (HP:0011800)	13/62	0.00272657	0.463231	2.73508	16.1498	SATB2;WNT5A;COL11A2;PYCR1;KIF22;RUNX2;BMP4;COL1A1;SHH;POR;CCDC8;MGP;FGFR1
CvsSt	Human_Phenotype_Ontology	Abnormality of nucleobase metabolism (HP:0010932)	9/35	0.00283014	0.463231	3.56497	20.9172	SLC2A9;MUC1;PNP;ASL;HNF1B;ALDOB;XDH;MOCS1;ASS1
CvsSt	Human_Phenotype_Ontology	Follicular hyperkeratosis (HP:0007502)	4/8	0.00323814	0.463231	10.2822	58.9452	COL6A2;COL6A1;COL6A3;DSG4
CvsSt	Human_Phenotype_Ontology	Woolly hair (HP:0002224)	6/18	0.00353727	0.463231	5.14463	29.0384	KRT71;DLX3;LIPH;APCDD1;DSG4;KRT74
CvsSt	Human_Phenotype_Ontology	Hypoplastic left heart (HP:0004383)	5/13	0.00384805	0.463231	6.42857	35.7441	GJA1;DTNA;FOXF1;GATA4;NR2F2
CvsSt	Human_Phenotype_Ontology	Abnormality of purine metabolism (HP:0004352)	7/24	0.00384899	0.463231	4.23799	23.563	SLC2A9;MUC1;PNP;HNF1B;ALDOB;XDH;MOCS1
CvsSt	Human_Phenotype_Ontology	Platyspondyly (HP:0000926)	14/72	0.00396684	0.463231	2.48859	13.7614	FKBP10;COL11A2;PYCR1;KIF22;HSPG2;RUNX2;PAPSS2;COL1A1;BMP1;ADAMTSL2;COL10A1;ADA;FGFR1;FBN1
CvsSt	Human_Phenotype_Ontology	Hypotelorism (HP:0000601)	9/37	0.00424383	0.463231	3.30997	18.08	TGIF1;SHH;GJA1;PTCH1;EPG5;PYCR1;GATA2;CDON;FGFR1
CvsSt	Human_Phenotype_Ontology	Dry hair (HP:0011359)	4/9	0.00542077	0.516443	8.22528	42.9156	WNT10A;GJA1;ASL;KRT74
CvsSt	Human_Phenotype_Ontology	Amelogenesis imperfecta (HP:0000705)	5/14	0.00555241	0.516443	5.71397	29.6756	SLC24A4;DLX3;WDR72;FAM20A;MMP20
CvsSt	Human_Phenotype_Ontology	Insulin resistance (HP:0000855)	7/26	0.00625318	0.516443	3.79147	19.2404	HSD11B1;LIPE;KCNJ11;HNF4A;HNF1B;AGPAT2;LMNB2
CvsSt	Human_Phenotype_Ontology	Fine hair (HP:0002213)	11/54	0.00705678	0.516443	2.6351	13.0537	KRT71;EDAR;GJA1;WNT10A;CDH3;LIPH;SATB2;PYCR1;MSX1;DSG4;KRT74
CvsSt	Human_Phenotype_Ontology	Abnormal hair laboratory examination (HP:0003328)	5/15	0.00772708	0.516443	5.14229	25.0071	CDH3;FOXE1;ASL;DSG4;KRT85
CvsSt	Human_Phenotype_Ontology	Craniofacial dystonia (HP:0012179)	7/27	0.00780656	0.516443	3.6017	17.4783	SYNGAP1;COL6A2;COL6A1;COL6A3;ATP13A2;TGM6;ANO3
CvsSt	Human_Phenotype_Ontology	Alkalosis (HP:0001948)	6/21	0.00820807	0.516443	4.11503	19.763	SCNN1G;KCNJ10;CA5A;ASL;SLC26A3;ASS1
CvsSt	Human_Phenotype_Ontology	Hypotrichosis (HP:0001006)	6/21	0.00820807	0.516443	4.11503	19.763	EDAR;WNT10A;CDH3;HOXC13;APCDD1;KRT74
CvsSt	Human_Phenotype_Ontology	Autosomal recessive inheritance (HP:0000007)	181/1722	0.00822928	0.516443	1.22854	5.89706	SLC4A1;TNF;GJA1;PNP;ATCAY;CDH3;EDNRB;PPP2R1B;IYD;LIPH;PIEZO2;NEK2;LRAT;RTTN;B2M;CPT1A;PHYH;SLC6A19;COL27A1;SERPINF1;WDR72;VRK1;MYO7A;HSPG2;PRSS56;EDAR;SCNN1G;POR;TYROBP;SLCO2A1;AGTR1;ADAM9;AIPL1;CARD11;CFTR;CERKL;KCNE1;APCDD1;NALCN;ADAMTS10;ACACA;PIK3R5;C3;LOXHD1;OTOA;ADAMTS13;RDH12;ADAMTS18;ADAMTS17;HESX1;ST3GAL5;ATP6V0A4;ASL;APOE;ZNF423;TRPM6;WNT3;STRA6;WNT10B;WNT10A;FOXF1;SLC10A2;ABCA3;PMM2;PY…
CvsSt	Human_Phenotype_Ontology	Pili torti (HP:0003777)	4/10	0.0084045	0.516443	6.85403	32.7553	CDH3;FOXE1;DSG4;KRT85
CvsSt	Human_Phenotype_Ontology	Protruding ear (HP:0000411)	8/35	0.0101804	0.516443	3.04961	13.9894	BMP4;BMP1;CCDC8;COL6A2;COL6A1;PIEZO2;PYCR1;COL6A3
CvsSt	Human_Phenotype_Ontology	Abnormality of the pupil (HP:0000615)	8/35	0.0101804	0.516443	3.04961	13.9894	KRT71;ACTA2;DDC;PHYH;GPR143;LIPH;KRT74;FBN1
CvsSt	Human_Phenotype_Ontology	Hypoplastic heart (HP:0001961)	5/16	0.0104297	0.516443	4.67455	21.3304	GJA1;DTNA;FOXF1;GATA4;NR2F2
CvsSt	Human_Phenotype_Ontology	Abnormality of renal excretion (HP:0011036)	7/29	0.0117384	0.516443	3.27391	14.5522	MUC1;KCNJ10;CYP24A1;GALNT3;AGTR1;CTNS;FAM20A
CvsSt	Human_Phenotype_Ontology	Focal dystonia (HP:0004373)	7/29	0.0117384	0.516443	3.27391	14.5522	SYNGAP1;COL6A2;COL6A1;COL6A3;ATP13A2;TGM6;ANO3
CvsSt	Human_Phenotype_Ontology	Late onset (HP:0003584)	4/11	0.0122892	0.516443	5.87456	25.8424	BEAN1;HNF4A;HNF1B;APOE
CvsSt	Human_Phenotype_Ontology	Cardiovascular calcification (HP:0011915)	4/11	0.0122892	0.516443	5.87456	25.8424	NT5E;GALNT3;SLC20A2;FBN1
CvsSt	Human_Phenotype_Ontology	Congenital stationary night blindness (HP:0007642)	4/11	0.0122892	0.516443	5.87456	25.8424	TRPM1;PDE6B;GNAT1;CACNA1F
CvsSt	Human_Phenotype_Ontology	Abnormality of the parietal bone (HP:0002696)	4/11	0.0122892	0.516443	5.87456	25.8424	MSX2;PTCH1;PTCH2;RUNX2
CvsSt	Human_Phenotype_Ontology	Triangular face (HP:0000325)	12/66	0.0125541	0.516443	2.28899	10.0205	COL1A1;FKBP10;MYCN;BMP1;CCDC8;PIEZO2;TNNI2;PYCR1;SLCO5A1;SULF1;NALCN;BUB1
CvsSt	Human_Phenotype_Ontology	Nephrolithiasis (HP:0000787)	12/66	0.0125541	0.516443	2.28899	10.0205	CLIP2;SLC6A19;CYP24A1;SLC7A9;CTNS;HNF1B;AGXT;HSPG2;MOCS1;XDH;PLCD1;FBN1
CvsSt	Human_Phenotype_Ontology	Generalized hypopigmentation (HP:0007513)	6/23	0.0131022	0.516443	3.63051	15.7382	EDNRB;PAH;EPG5;TYR;CACNA1F;LYST
CvsSt	Human_Phenotype_Ontology	Aortic valve stenosis (HP:0001650)	6/23	0.0131022	0.516443	3.63051	15.7382	CYP24A1;VWF;ADAMTSL2;NR2F2;ADAMTS10;FBN1
CvsSt	Human_Phenotype_Ontology	Intestinal polyp (HP:0005266)	8/37	0.0142602	0.541019	2.83898	12.0665	EDNRB;EDN3;APC;PTCH1;PTCH2;NRTN;AXIN2;BUB1
CvsSt	Human_Phenotype_Ontology	Hypokalemia (HP:0002900)	6/24	0.0161865	0.541019	3.42863	14.1382	SCNN1G;KCNJ10;CTNS;SCN4A;CACNA1S;SLC26A3
CvsSt	Human_Phenotype_Ontology	Abnormality of hair growth rate (HP:0011363)	6/24	0.0161865	0.541019	3.42863	14.1382	KRT71;EDAR;GJA1;LIPH;DSG4;KRT74
CvsSt	Human_Phenotype_Ontology	Short middle phalanx of finger (HP:0005819)	6/24	0.0161865	0.541019	3.42863	14.1382	BMP4;GJA1;WNT5A;COL10A1;RUNX2;FGFR1
CvsSt	Human_Phenotype_Ontology	Slow-growing hair (HP:0002217)	6/24	0.0161865	0.541019	3.42863	14.1382	KRT71;EDAR;GJA1;LIPH;DSG4;KRT74
CvsSt	Human_Phenotype_Ontology	Recurrent lower respiratory tract infections (HP:0002783)	8/38	0.0166946	0.541019	2.74419	11.2311	PNP;COL6A2;COL11A2;COL6A1;CYBB;COL6A3;TNFRSF13C;CFTR
CvsSt	Human_Phenotype_Ontology	Aplasia/Hypoplasia of the middle phalanx of the 5th finger (HP:0009161)	4/12	0.017157	0.541019	5.13995	20.8957	GJA1;MYCN;WNT5A;RUNX2
CvsSt	Human_Phenotype_Ontology	Biconcave vertebral bodies (HP:0004586)	4/12	0.017157	0.541019	5.13995	20.8957	COL1A1;FKBP10;SERPINF1;KIF22
CvsSt	Human_Phenotype_Ontology	Myositis (HP:0100614)	4/12	0.017157	0.541019	5.13995	20.8957	IL10;PSTPIP1;TLR4;IL12RB2
CvsSt	Human_Phenotype_Ontology	Renal tubular acidosis (HP:0001947)	5/18	0.0176281	0.543787	3.95496	15.9712	CPT1A;CA2;SLC4A1;ATP6V0A4;ALDOB
CvsSt	Human_Phenotype_Ontology	Broad long bones (HP:0005622)	8/39	0.0194145	0.586153	2.65552	10.4674	COL1A1;GJA1;WNT5A;COL10A1;KIF22;ADAMTS10;FGFR1;FBN1
CvsSt	Human_Phenotype_Ontology	Aplasia/Hypoplasia of the spleen (HP:0010451)	4/13	0.0230722	0.654788	4.5686	17.2196	MYCN;DNAI1;WNT3;STRA6
CvsSt	Human_Phenotype_Ontology	Aplasia/Hypoplasia of the phalanges of the 5th finger (HP:0009376)	4/13	0.0230722	0.654788	4.5686	17.2196	GJA1;MYCN;WNT5A;RUNX2
CvsSt	Human_Phenotype_Ontology	Abnormal rod and cone electroretinograms (HP:0008323)	4/13	0.0230722	0.654788	4.5686	17.2196	CERKL;PDE6B;AIPL1;CACNA1F
CvsSt	Human_Phenotype_Ontology	Round face (HP:0000311)	9/49	0.0268761	0.658631	2.31545	8.37387	SEMA5A;PLCB4;DLX3;COL6A2;ADAMTSL2;COL6A1;COL11A2;COL6A3;FBN1
CvsSt	Human_Phenotype_Ontology	Abnormality of complement system (HP:0005339)	5/20	0.027509	0.658631	3.42725	12.315	C3;C1QA;C8B;DNASE1L3;LMNB2
CvsSt	Human_Phenotype_Ontology	Tachypnea (HP:0002789)	5/20	0.027509	0.658631	3.42725	12.315	ACTA2;ACADVL;CA5A;ABCA3;CSF2RA
CvsSt	Human_Phenotype_Ontology	Concave nail (HP:0001598)	3/8	0.0278491	0.658631	6.16548	22.0783	MSX1;HOXC13;PLCD1
CvsSt	Human_Phenotype_Ontology	Mesangial abnormality (HP:0001966)	3/8	0.0278491	0.658631	6.16548	22.0783	NPHS1;APOE;ADA
CvsSt	Human_Phenotype_Ontology	Autoimmune thrombocytopenia (HP:0001973)	3/8	0.0278491	0.658631	6.16548	22.0783	PNP;FAS;ADA
CvsSt	Human_Phenotype_Ontology	Wrist flexion contracture (HP:0001239)	3/8	0.0278491	0.658631	6.16548	22.0783	TUBB3;ADAMTSL2;HSPG2
CvsSt	Human_Phenotype_Ontology	Round ear (HP:0100830)	3/8	0.0278491	0.658631	6.16548	22.0783	ADAMTSL2;TNNI2;FBN1
CvsSt	Human_Phenotype_Ontology	Broad metatarsal (HP:0001783)	3/8	0.0278491	0.658631	6.16548	22.0783	ADAMTS10;FGFR1;FBN1
CvsSt	Human_Phenotype_Ontology	Short middle phalanx of the 5th finger (HP:0004220)	3/8	0.0278491	0.658631	6.16548	22.0783	GJA1;WNT5A;RUNX2
CvsSt	Human_Phenotype_Ontology	Increased variability in muscle fiber diameter (HP:0003557)	4/14	0.0300801	0.677518	4.11151	14.4063	COL6A2;COL6A1;COL6A3;ITGA7
CvsSt	Human_Phenotype_Ontology	Neoplasm of the oral cavity (HP:0100649)	4/14	0.0300801	0.677518	4.11151	14.4063	APC;PTCH1;PTCH2;HSPG2
CvsSt	Human_Phenotype_Ontology	Abnormality of the middle phalanx of the 5th finger (HP:0004219)	4/14	0.0300801	0.677518	4.11151	14.4063	GJA1;MYCN;WNT5A;RUNX2
CvsSt	Human_Phenotype_Ontology	Intestinal polyposis (HP:0200008)	7/35	0.031783	0.701656	2.57151	8.86868	EDNRB;EDN3;APC;PTCH1;NRTN;AXIN2;BUB1
CvsSt	Human_Phenotype_Ontology	Tarsal synostosis (HP:0008368)	6/28	0.0334529	0.701656	2.80462	9.52903	POR;TNNI2;SLCO5A1;FBLN1;SULF1;FGFR1
CvsSt	Human_Phenotype_Ontology	Paralysis (HP:0003470)	4/15	0.0382084	0.701656	3.73753	12.2019	CA2;SLC4A1;SCN4A;CACNA1S
CvsSt	Human_Phenotype_Ontology	Abnormality of the phalanges of the 5th finger (HP:0004213)	4/15	0.0382084	0.701656	3.73753	12.2019	GJA1;MYCN;WNT5A;RUNX2
CvsSt	Human_Phenotype_Ontology	Abnormality of glutamine family amino acid metabolism (HP:0010902)	4/15	0.0382084	0.701656	3.73753	12.2019	SLC6A19;SLC7A9;ASL;ASS1
CvsSt	Human_Phenotype_Ontology	Maternal diabetes (HP:0009800)	4/15	0.0382084	0.701656	3.73753	12.2019	SHH;GJA1;HESX1;FGFR1
CvsSt	Human_Phenotype_Ontology	Annular pancreas (HP:0001734)	3/9	0.0390633	0.701656	5.13762	16.6591	MYCN;FOXF1;STRA6
CvsSt	Human_Phenotype_Ontology	Type 1 muscle fiber predominance (HP:0003803)	3/9	0.0390633	0.701656	5.13762	16.6591	COL6A2;COL6A1;COL6A3
CvsSt	Human_Phenotype_Ontology	Synostosis involving the elbow (HP:0003938)	3/9	0.0390633	0.701656	5.13762	16.6591	POR;CYP26B1;FGFR1
CvsSt	Human_Phenotype_Ontology	Aplasia/Hypoplasia of the 4th metacarpal (HP:0010042)	3/9	0.0390633	0.701656	5.13762	16.6591	PTCH1;PTCH2;DCHS1
CvsSt	Human_Phenotype_Ontology	Short 4th metacarpal (HP:0010044)	3/9	0.0390633	0.701656	5.13762	16.6591	PTCH1;PTCH2;DCHS1
CvsSt	Human_Phenotype_Ontology	Abnormal pupillary function (HP:0007686)	3/9	0.0390633	0.701656	5.13762	16.6591	ACTA2;PHYH;DDC
CvsSt	Human_Phenotype_Ontology	Slender build (HP:0001533)	3/9	0.0390633	0.701656	5.13762	16.6591	COL6A2;COL6A1;COL6A3
CvsSt	Human_Phenotype_Ontology	Optic neuritis (HP:0100653)	3/9	0.0390633	0.701656	5.13762	16.6591	IL10;TLR4;IL12RB2
CvsSt	Human_Phenotype_Ontology	Retrobulbar optic neuritis (HP:0100654)	3/9	0.0390633	0.701656	5.13762	16.6591	IL10;TLR4;IL12RB2
CvsSt	Human_Phenotype_Ontology	Humeroradial synostosis (HP:0003041)	3/9	0.0390633	0.701656	5.13762	16.6591	POR;CYP26B1;FGFR1
CvsSt	Human_Phenotype_Ontology	Paraparesis (HP:0002385)	5/22	0.0403309	0.706537	3.02372	9.70806	GJA1;GJB1;EDNRB;ATP13A2;ABCD1
CvsSt	Human_Phenotype_Ontology	Anosmia (HP:0000458)	5/22	0.0403309	0.706537	3.02372	9.70806	PHYH;SHH;ATP13A2;DNAI1;FGFR1
CvsSt	Human_Phenotype_Ontology	Nephrocalcinosis (HP:0000121)	7/37	0.041733	0.722184	2.39981	7.62292	CLIP2;CYP24A1;GALNT3;SLC4A1;ATP6V0A4;FAM20A;AGXT
CvsSt	Human_Phenotype_Ontology	Synostosis involving bones of the feet (HP:0009140)	6/30	0.0453557	0.726233	2.57062	7.9515	POR;TNNI2;SLCO5A1;FBLN1;SULF1;FGFR1
CvsSt	Human_Phenotype_Ontology	Ectopia lentis (HP:0001083)	6/30	0.0453557	0.726233	2.57062	7.9515	COL1A1;ADAMTS17;HSPG2;MOCS1;ADAMTS10;FBN1
CvsSt	Human_Phenotype_Ontology	Synostosis involving bones of the lower limbs (HP:0009138)	6/30	0.0453557	0.726233	2.57062	7.9515	POR;TNNI2;SLCO5A1;FBLN1;SULF1;FGFR1
CvsSt	Human_Phenotype_Ontology	Abnormality of the basal ganglia (HP:0002134)	7/38	0.0473868	0.726233	2.32227	7.08156	GJA1;TYROBP;SUCLA2;SLC20A2;CA2;VRK1;FOXP2
CvsSt	Human_Phenotype_Ontology	Abnormality of skeletal muscle fiber size (HP:0012084)	4/16	0.047468	0.726233	3.42588	10.4411	COL6A2;COL6A1;COL6A3;ITGA7
CvsSt	Human_Phenotype_Ontology	Vasculitis (HP:0002633)	8/46	0.0476648	0.726233	2.16552	6.59088	IL10;PNP;TNFSF12;FAS;TNFRSF13C;DNASE1L3;TLR4;IL12RB2
CvsSt	Human_Phenotype_Ontology	Coxa vara (HP:0002812)	5/23	0.0478944	0.726233	2.85557	8.6774	FKBP10;SERPINF1;COL10A1;HSPG2;RUNX2
CvsSt	Human_Phenotype_Ontology	Ocular albinism (HP:0001107)	5/23	0.0478944	0.726233	2.85557	8.6774	GPR143;TYRP1;EPG5;TYR;LYST
CvsSt	Human_Phenotype_Ontology	Tracheal stenosis (HP:0002777)	5/23	0.0478944	0.726233	2.85557	8.6774	KCNJ10;ADAMTSL2;MGP;WNT3;FBN1
CvsSt	KEGG_2021_Human	Melanogenesis	26/101	5.01534e-07	0.000149457	3.59523	52.151	CAMK2B;CALML5;TCF7;CAMK2A;LEF1;TYRP1;WNT8B;ADCY2;CALML4;FZD10;ADCY1;WNT6;EDNRB;WNT11;PRKACG;DVL2;WNT3;WNT10B;WNT10A;PRKCB;WNT5A;TYR;KITLG;PLCB4;DCT;KIT
CvsSt	KEGG_2021_Human	Basal cell carcinoma	18/63	5.73879e-06	0.00085508	4.13629	49.9178	WNT10B;WNT10A;HHIP;PTCH1;WNT5A;LEF1;TCF7;PTCH2;WNT8B;FZD10;AXIN2;BMP4;WNT6;SHH;WNT11;APC;DVL2;WNT3
CvsSt	KEGG_2021_Human	Aldosterone synthesis and secretion	23/98	1.19913e-05	0.00103142	3.17495	35.9764	CAMK2B;DAGLA;CAMK1D;CALML5;KCNK9;PRKCB;PRKCE;PDE2A;CAMK2A;ADCY2;CALML4;ATP1B2;CACNA1C;ADCY1;CACNA1F;LIPE;CACNA1I;PLCB4;PRKACG;AGTR1;CACNA1S;CAMK1G;KCNK3
CvsSt	KEGG_2021_Human	Cushing syndrome	31/155	1.38446e-05	0.00103142	2.59312	29.0109	CAMK2B;TCF7;CAMK2A;LEF1;WNT8B;ADCY2;FZD10;CACNA1C;ADCY1;CACNA1F;CACNA1I;WNT6;WNT11;PRKACG;DVL2;CACNA1S;WNT3;WNT10B;WNT10A;CDKN2C;WNT5A;AXIN2;CDK6;NCEH1;PLCB4;APC;AGTR1;CRH;AIPL1;KCNK2;KCNK3
CvsSt	KEGG_2021_Human	Wnt signaling pathway	32/166	2.214e-05	0.00114398	2.47706	26.5495	CAMK2B;TCF7;CAMK2A;LEF1;WNT8B;FZD10;CXXC4;NKD1;LRP6;NKD2;WNT6;PPP3CA;WNT11;PRKACG;DVL2;CER1;WNT3;TLE4;WNT10B;WNT10A;PRKCB;SERPINF1;WNT5A;AXIN2;NFATC4;PLCB4;APC;BAMBI;ROR1;NOTUM;LGR6;PPARD
CvsSt	KEGG_2021_Human	Staphylococcus aureus infection	22/95	2.30332e-05	0.00114398	3.11868	33.303	IL10;C1QA;C5AR1;KRT35;KRT32;KRT31;KRT40;C3;KRT33A;FCGR3B;HLA-DMB;KRT28;KRT39;KRT27;KRT26;KRT15;KRT25;KRT36;HLA-DRA;FCGR2B;CAMP;HLA-DQB1
CvsSt	KEGG_2021_Human	Arachidonic acid metabolism	16/61	5.97011e-05	0.00254156	3.67253	35.7196	GGT5;PLA2G2F;GPX2;PTGIS;PLA2G2E;GPX3;ALOX15;ALOX15B;PLB1;HPGDS;JMJD7-PLA2G4B;ALOX5;PLA2G10;CYP2E1;GGT1;PTGES
CvsSt	KEGG_2021_Human	Protein digestion and absorption	21/103	0.000243359	0.00906513	2.64736	22.0286	COL28A1;SLC6A19;COL15A1;COL16A1;COL27A1;COL14A1;KCNJ13;COL11A2;SLC3A2;ATP1B2;SLC1A5;COL19A1;DPP4;COL1A1;SLC7A8;SLC7A9;COL6A2;COL6A1;COL10A1;COL6A3;KCNN4
CvsSt	KEGG_2021_Human	Cell adhesion molecules	26/148	0.000574295	0.0175875	2.20446	16.4505	NLGN3;LRRC4;CDH5;CDH4;ALCAM;CDH3;HLA-DMB;NRCAM;NCAM1;LRRC4C;JAM3;ITGA4;HLA-E;IGSF11;CD2;CLDN10;CD4;NFASC;CLDN3;PTPRC;CD8B;CLDN14;HLA-DRA;CLDN17;NECTIN3;HLA-DQB1
CvsSt	KEGG_2021_Human	Proteoglycans in cancer	33/205	0.000590184	0.0175875	1.98707	14.774	CAMK2B;ITGB3;CAMK2A;WNT8B;FZD10;TNF;WNT6;SHH;WNT11;ERBB4;PRKACG;GPC1;KDR;PLCG2;WNT3;VAV3;WNT10B;WNT10A;PRKCB;CAV2;PTCH1;WNT5A;FRS2;ANK1;HSPG2;MMP9;COL1A1;MRAS;FAS;HPSE;TLR4;HBEGF;FGFR1
CvsSt	KEGG_2021_Human	Renin secretion	15/69	0.000901844	0.0234717	2.86611	20.0945	CALML5;EDN3;PDE1B;CALML4;CACNA1C;CACNA1F;PPP3CA;EDNRA;PLCB4;PRKACG;ADORA1;AGTR1;PDE3A;PRKG2;CACNA1S
CvsSt	KEGG_2021_Human	Sulfur metabolism	5/10	0.00094517	0.0234717	10.2874	71.643	MPST;SELENBP1;TST;SQOR;PAPSS2
CvsSt	KEGG_2021_Human	Hematopoietic cell lineage	19/99	0.00102587	0.0235162	2.45259	16.8792	ITGA4;IL1R2;ITGB3;DNTT;TNF;CSF2RA;GP5;CD2;CD4;KITLG;HLA-DMB;CD8B;IL7;ANPEP;IL1B;KIT;HLA-DRA;CD59;HLA-DQB1
CvsSt	KEGG_2021_Human	Insulin secretion	17/86	0.00131636	0.0280198	2.54291	16.8668	GLP1R;CAMK2B;SNAP25;KCNJ11;PRKCB;CAMK2A;ADCY2;CCK;ATP1B2;ADCY1;CACNA1C;CACNA1F;RIMS2;PLCB4;PRKACG;CACNA1S;KCNN4
CvsSt	KEGG_2021_Human	Axon guidance	29/182	0.001443	0.0286676	1.96063	12.8245	SEMA5A;CAMK2B;CAMK2A;SEMA3B;LRRC4;SEMA3F;ROBO1;PPP3CA;SHH;ABLIM1;EFNB3;ABLIM3;DPYSL2;PLCG2;SLIT1;FYN;EPHB2;LRRC4C;SRGAP2;PAK5;SEMA4A;UNC5B;SEMA6D;PTCH1;WNT5A;SEMA4F;NFATC4;NGEF;EPHA2
CvsSt	KEGG_2021_Human	Calcium signaling pathway	35/240	0.00242389	0.042629	1.76704	10.6418	CHRM2;CAMK2B;CALML5;PDE1B;CAMK2A;ADCY2;CALML4;ADCY1;CACNA1C;CACNA1F;RYR3;PPP3CA;CACNA1I;EDNRA;EDNRB;ERBB4;PRKACG;KDR;PLCG2;CACNA1S;FGF22;CAMK1D;PRKCB;SPHK2;NOS3;MST1;TNNC2;VEGFD;TRHR;PLCB4;AGTR1;CASQ1;PLCD1;CAMK1G;FGFR1
CvsSt	KEGG_2021_Human	Hippo signaling pathway	26/163	0.00243186	0.042629	1.96147	11.8063	TCF7;LEF1;WNT8B;FZD10;NKD1;NKD2;WNT6;RASSF2;WNT11;PPP2R1B;RASSF4;DVL2;WNT3;WNT10B;WNT10A;WNT5A;BMP8B;AXIN2;FRMD1;SMAD7;BMP4;DLG2;APC;PPP2R2C;DLG4;DCHS1
CvsSt	KEGG_2021_Human	Cytokine-cytokine receptor interaction	41/295	0.00272313	0.0450829	1.67186	9.87393	CCL11;CXCL8;TNFRSF13C;CXCR6;TNF;CSF2RA;CCR9;CCL2;CCR4;IL12RB2;CCR1;TNFSF18;IL10;GDF11;CCL23;XCR1;CCL22;IL15;GDF15;IL1R2;TNFSF12;IFNGR2;IL34;TNFRSF19;IL18;IL19;BMP8B;TNFRSF10A;IFNW1;EDAR;BMP4;CXCL10;CD4;IL7;TNFSF4;IL1B;IFNE;ACKR4;FAS;CCL27;IFNAR1
CvsSt	KEGG_2021_Human	Viral protein interaction with cytokine and cytokine receptor	18/100	0.00288993	0.0453262	2.2653	13.2441	CCR1;IL10;CCL23;XCR1;CXCL8;CCL11;CCL22;IL34;IL18;IL19;TNFRSF10A;TNF;CXCL10;CCR9;ACKR4;CCL2;CCR4;CCL27
CvsSt	KEGG_2021_Human	cGMP-PKG signaling pathway	26/167	0.00341517	0.0508861	1.9054	10.8218	CALML5;GATA4;ADCY2;CALML4;CACNA1C;ADCY1;CACNA1F;KNG1;PIK3R6;PIK3R5;PPP3CA;EDNRA;EDNRB;ADORA1;PRKG2;CACNA1S;NOS3;PRKCE;PDE2A;IRAG1;ATP1B2;ADRA2B;NFATC4;PLCB4;AGTR1;PDE3A
CvsSt	KEGG_2021_Human	African trypanosomiasis	9/37	0.00424383	0.057305	3.30997	18.08	IL10;PLCB4;PRKCB;IL1B;IL18;FAS;TNF;KNG1;IDO1
CvsSt	KEGG_2021_Human	Estrogen signaling pathway	22/137	0.00462656	0.057305	1.9751	10.618	CALML5;NOS3;KRT35;ADCY2;CALML4;KRT32;OPRM1;ADCY1;KRT31;MMP9;KRT40;KRT33A;PLCB4;KRT28;KRT39;KRT27;PRKACG;KRT26;KRT15;KRT25;KRT36;HBEGF
CvsSt	KEGG_2021_Human	Oxytocin signaling pathway	24/154	0.00472041	0.057305	1.90664	10.2117	CAMK2B;CAMK1D;PRKAA2;CALML5;PRKCB;NOS3;CAMK2A;CACNA2D3;ADCY2;CALML4;CACNA1C;ADCY1;CACNA1F;PIK3R6;RYR3;PIK3R5;NFATC4;PPP3CA;CACNG8;PLCB4;PRKACG;JMJD7-PLA2G4B;CACNA1S;CAMK1G
CvsSt	KEGG_2021_Human	Cholinergic synapse	19/113	0.00491534	0.057305	2.0857	11.0863	CHRM2;CAMK2B;PRKCB;CHRNA4;CAMK2A;ADCY2;CACNA1C;ADCY1;CACNA1F;PIK3R6;PIK3R5;SLC5A7;PLCB4;PRKACG;GNB4;KCNQ4;FYN;CACNA1S;GNB5
CvsSt	KEGG_2021_Human	Circadian entrainment	17/97	0.00493765	0.057305	2.19193	11.641	GRIA1;CAMK2B;GRIA2;CALML5;PRKCB;CAMK2A;ADCY2;CALML4;CACNA1C;ADCY1;RYR3;CACNA1I;PLCB4;PRKACG;GNB4;PRKG2;GNB5
CvsSt	KEGG_2021_Human	Pathways in cancer	65/531	0.00499977	0.057305	1.44768	7.67032	CXCL8;CALML5;LAMC3;HHIP;FZD10;CALML4;SHH;EDNRA;EDNRB;MECOM;PRKACG;RASSF5;HEY2;JAK3;DAPK1;PRKCB;IL15;IFNGR2;WNT5A;AXIN2;MMP9;CCNA1;PLCB4;KIT;AGTR1;PPARD;IFNAR1;CAMK2B;TCF7;CAMK2A;LEF1;WNT8B;ADCY2;KLK3;ADCY1;CSF2RA;KNG1;LRP6;RASGRP3;WNT6;WNT11;PLCG2;DVL2;PMAIP1;FGF22;WNT3;IL12RB2;WNT10B;WNT10A;TXNRD1;PTCH1;PTCH2;LAMB4;VEGFD;BMP4;HEYL;KITLG;CDK6;APC;IL7;GNB4;FAS;GNB5;BCL2L1;FGFR1
CvsSt	KEGG_2021_Human	cAMP signaling pathway	31/216	0.00525366	0.0579848	1.73224	9.09221	CHRM2;GRIA1;GLP1R;CAMK2B;GRIA2;CALML5;HHIP;CAMK2A;ADCY2;CALML4;ADCY1;CACNA1C;CACNA1F;LIPE;EDNRA;HCAR1;PRKACG;ADORA1;PDE4B;CNGA2;PDE4A;CACNA1S;VAV3;EDN3;PTCH1;NPY1R;ARAP3;ATP1B2;PDE3A;CFTR;HCN2
CvsSt	KEGG_2021_Human	Inflammatory mediator regulation of TRP channels	17/98	0.00549193	0.0584498	2.16475	11.2664	CAMK2B;CALML5;PRKCB;PRKCE;CAMK2A;TRPV2;TRPV3;ADCY2;CALML4;ADCY1;KNG1;PLCB4;PRKACG;IL1B;JMJD7-PLA2G4B;PLCG2;ASIC2
CvsSt	KEGG_2021_Human	Gastric acid secretion	14/76	0.00654122	0.0672166	2.32752	11.7066	CAMK2B;KCNJ10;CALML5;PRKCB;CAMK2A;ADCY2;CALML4;ATP1B2;ADCY1;PLCB4;CA2;PRKACG;KCNK2;CFTR
CvsSt	KEGG_2021_Human	Vascular smooth muscle contraction	21/133	0.00677706	0.0673188	1.93504	9.66401	PLA2G2F;PLA2G2E;CALML5;EDN3;PRKCB;PRKCE;IRAG1;ADCY2;CALML4;CACNA1C;ADCY1;CACNA1F;ACTA2;EDNRA;PLCB4;PRKACG;JMJD7-PLA2G4B;PLA2G10;AGTR1;CACNA1S;RAMP1
CvsSt	KEGG_2021_Human	Phototransduction	7/28	0.00962687	0.0925421	3.43	15.9262	GUCY2D;CALML5;GUCA1B;PDE6B;CALML4;GNAT1;RGS9
CvsSt	KEGG_2021_Human	ECM-receptor interaction	15/88	0.0102907	0.0958318	2.11792	9.6927	ITGA4;VWF;LAMC3;ITGB3;LAMB4;HSPG2;GP5;THBS4;COL1A1;SV2C;COL6A2;COL6A1;COL6A3;ITGA7;ITGB6
CvsSt	KEGG_2021_Human	Cortisol synthesis and secretion	12/65	0.0111472	0.0977021	2.33231	10.4874	CACNA1I;PLCB4;NCEH1;PRKACG;AGTR1;ADCY2;ADCY1;CACNA1C;CACNA1S;CACNA1F;KCNK2;KCNK3
CvsSt	KEGG_2021_Human	Inflammatory bowel disease	12/65	0.0111472	0.0977021	2.33231	10.4874	IL10;MAF;HLA-DMB;IFNGR2;IL1B;IL18;HLA-DRA;RORA;TNF;TLR4;HLA-DQB1;IL12RB2
CvsSt	KEGG_2021_Human	Linoleic acid metabolism	7/29	0.0117384	0.0999442	3.27391	14.5522	PLA2G2F;PLA2G2E;JMJD7-PLA2G4B;ALOX15;PLA2G10;CYP2E1;PLB1
CvsSt	KEGG_2021_Human	Mucin type O-glycan biosynthesis	8/36	0.0120945	0.100115	2.94053	12.9825	GALNT6;GALNT16;GALNT3;GALNT1;GCNT1;C1GALT1;ST6GALNAC3;ST3GAL1
CvsSt	KEGG_2021_Human	Adrenergic signaling in cardiomyocytes	22/150	0.0132452	0.106678	1.77323	7.66767	CAMK2B;KCNE1;CALML5;CAMK2A;CACNA2D3;ADCY2;CALML4;ATP1B2;CACNA1C;ADCY1;CACNA1F;PIK3R6;PIK3R5;CACNG8;PLCB4;ACTC1;PPP2R1B;PPP2R2C;PRKACG;AGTR1;CACNA1S;SCN4B
CvsSt	KEGG_2021_Human	Morphine addiction	15/91	0.013861	0.107685	2.03398	8.70275	GABRP;PRKCB;PDE1B;PDE2A;ADCY2;OPRM1;ADCY1;PRKACG;ADORA1;PDE4B;GNB4;PDE3A;PDE4A;GNB5;PDE7B
CvsSt	KEGG_2021_Human	Long-term potentiation	12/67	0.014093	0.107685	2.24725	9.57794	CAMK2B;GRIA1;PPP3CA;GRIA2;PLCB4;CALML5;PRKCB;PRKACG;CAMK2A;CALML4;ADCY1;CACNA1C
CvsSt	KEGG_2021_Human	AGE-RAGE signaling pathway in diabetic complications	16/100	0.0148097	0.109716	1.9632	8.26994	EGR1;CXCL8;PRKCB;NOS3;PRKCE;CYBB;VEGFD;TNF;COL1A1;PLCB4;IL1B;AGTR1;PLCG2;NOX4;CCL2;PLCD1
CvsSt	KEGG_2021_Human	Vitamin digestion and absorption	6/24	0.0161865	0.109716	3.42863	14.1382	RBP2;AWAT2;SLC23A1;APOA4;LRAT;PLB1
CvsSt	KEGG_2021_Human	GnRH signaling pathway	15/93	0.0167292	0.109716	1.98161	8.10597	CAMK2B;EGR1;CALML5;PRKCB;CAMK2A;ADCY2;CALML4;ADCY1;CACNA1C;CACNA1F;PLCB4;PRKACG;JMJD7-PLA2G4B;CACNA1S;HBEGF
CvsSt	KEGG_2021_Human	Glycosaminoglycan biosynthesis	10/53	0.0169346	0.109716	2.39419	9.76446	CHST7;CHST11;NDST3;CHST15;CHST1;CHST4;ST3GAL1;B4GALT4;CHST2;HS3ST1
CvsSt	KEGG_2021_Human	Arrhythmogenic right ventricular cardiomyopathy	13/77	0.0174798	0.109716	2.09231	8.46699	ITGA4;ACTN2;ITGB3;LEF1;TCF7;CACNA2D3;CACNA1C;CACNA1F;GJA1;CACNG8;ITGA7;ITGB6;CACNA1S
CvsSt	KEGG_2021_Human	Leishmaniasis	13/77	0.0174798	0.109716	2.09231	8.46699	IL10;ITGA4;PRKCB;IFNGR2;CYBB;TNF;C3;FCGR3B;HLA-DMB;IL1B;HLA-DRA;TLR4;HLA-DQB1
CvsSt	KEGG_2021_Human	Amphetamine addiction	12/69	0.0175962	0.109716	2.16816	8.75952	CAMK2B;GRIA1;PPP3CA;GRIA2;DDC;CALML5;MAOB;PRKCB;PRKACG;CAMK2A;CALML4;CACNA1C
CvsSt	KEGG_2021_Human	Other glycan degradation	5/18	0.0176281	0.109716	3.95496	15.9712	NEU2;MANBA;MAN2B2;HEXB;ENGASE
CvsSt	KEGG_2021_Human	Amoebiasis	16/102	0.0176723	0.109716	1.91734	7.7379	IL10;SERPINB3;CXCL8;SERPINB13;PRKCB;LAMC3;IL1R2;LAMB4;ADCY1;C8B;TNF;COL1A1;PLCB4;PRKACG;IL1B;TLR4
CvsSt	KEGG_2021_Human	Apelin signaling pathway	20/137	0.0184272	0.110799	1.76265	7.0399	EGR1;PRKAA2;CALML5;SPHK2;NOS3;PRKCE;ADCY2;CALML4;ADCY1;PIK3R6;RYR3;PIK3R5;ACTA2;LIPE;MRAS;PLCB4;PRKACG;AGTR1;GNB4;GNB5
CvsSt	KEGG_2021_Human	Human papillomavirus infection	41/331	0.0185904	0.110799	1.46138	5.82377	LAMC3;ITGB3;TCF7;WNT8B;FZD10;TNF;THBS4;WNT6;WNT11;PPP2R1B;PRKACG;HEY2;DVL2;ATP6V0A4;ITGB6;ATP6V1G3;WNT3;HES6;WNT10B;WNT10A;ITGA4;VWF;WNT5A;LAMB4;MX1;AXIN2;HLA-E;COL1A1;HEYL;CCNA1;CDK6;DLG2;APC;PPP2R2C;COL6A2;IRF1;COL6A1;FAS;COL6A3;ITGA7;IFNAR1
CvsSt	KEGG_2021_Human	alpha-Linolenic acid metabolism	6/25	0.0197374	0.115328	3.24799	12.7492	PLA2G2F;FADS2;PLA2G2E;JMJD7-PLA2G4B;PLA2G10;PLB1
CvsSt	KEGG_2021_Human	Glycine, serine and threonine metabolism	8/40	0.0224358	0.128574	2.5724	9.76765	BHMT;ALAS1;SDS;DAO;MAOB;CTH;AGXT;GCAT
CvsSt	KEGG_2021_Human	Glutamatergic synapse	17/114	0.0234111	0.131632	1.80608	6.78101	GRIA1;GRIA2;PRKCB;GRIK4;ADCY2;CACNA1C;ADCY1;PPP3CA;GRM4;PLCB4;DLG4;PRKACG;JMJD7-PLA2G4B;GNB4;HOMER3;GNB5;SLC38A3
CvsSt	KEGG_2021_Human	GnRH secretion	11/64	0.0243486	0.133564	2.13674	7.93857	HCN3;CACNA1I;PLCB4;KCNJ11;PRKCB;CACNA1C;CACNA1S;CACNA1F;KCNN4;HCN2;HCN1
CvsSt	KEGG_2021_Human	Parathyroid hormone synthesis, secretion and action	16/106	0.024651	0.133564	1.83172	6.78274	EGR1;PRKCB;PTH;ADCY2;ADCY1;RUNX2;LRP6;PLCB4;CYP24A1;MMP15;PRKACG;TRPV5;PDE4B;PDE4A;FGFR1;HBEGF
CvsSt	KEGG_2021_Human	Ferroptosis	8/41	0.0257735	0.137152	2.49431	9.1252	STEAP3;TF;LPCAT3;ALOX15;SLC40A1;CYBB;SLC3A2;SLC7A11
CvsSt	KEGG_2021_Human	PPAR signaling pathway	12/74	0.0291716	0.152511	1.99276	7.04352	FADS2;SLC27A1;CPT1A;FABP3;FABP4;FABP5;FABP6;FABP7;ME1;SORBS1;CPT1C;PPARD
CvsSt	KEGG_2021_Human	Malaria	9/50	0.0302824	0.155589	2.25885	7.89963	IL10;CXCL8;LRP1;IL1B;IL18;CCL2;TNF;TLR4;THBS4
CvsSt	KEGG_2021_Human	Fat digestion and absorption	8/43	0.033454	0.168971	2.35152	7.98948	PLA2G2F;SLC27A1;PLA2G2E;MOGAT2;PLA2G10;APOA4;CEL;AGPAT2
CvsSt	KEGG_2021_Human	Chagas disease	15/102	0.0355451	0.175081	1.77573	5.92554	IL10;C1QA;CXCL8;IFNGR2;ADCY1;TNF;KNG1;C3;PLCB4;PPP2R1B;PPP2R2C;IL1B;CCL2;FAS;TLR4
CvsSt	KEGG_2021_Human	Breast cancer	20/147	0.0361547	0.175081	1.62296	5.38815	WNT10B;WNT10A;WNT5A;TCF7;LEF1;WNT8B;FZD10;AXIN2;LRP6;WNT6;HEYL;CDK6;WNT11;APC;HEY2;KIT;DVL2;FGF22;WNT3;FGFR1
CvsSt	KEGG_2021_Human	Purine metabolism	18/129	0.0364262	0.175081	1.67079	5.53443	GUCY2D;ENTPD3;PDE1B;PDE2A;ADCY2;AMPD3;ADCY1;PAPSS2;NT5E;PNP;PDE3A;PDE4B;PDE4A;PDE6B;ENPP3;PDE7B;XDH;ADA
CvsSt	KEGG_2021_Human	Mineral absorption	10/60	0.0374048	0.176931	2.05821	6.76319	SLC6A19;TF;HEPHL1;SLC40A1;MT1G;CYBRD1;SLC30A1;ATP1B2;TRPM6;SLC26A3
CvsSt	KEGG_2021_Human	Arginine biosynthesis	5/22	0.0403309	0.187791	3.02372	9.70806	NOS3;GPT2;ASL;NAGS;ASS1
CvsSt	KEGG_2021_Human	Glycosphingolipid biosynthesis	8/45	0.0425556	0.195101	2.22417	7.02157	ST8SIA1;HEXB;ST3GAL5;ST8SIA5;ST3GAL6;ST6GALNAC3;ST3GAL1;B4GALT4
CvsSt	KEGG_2021_Human	Dilated cardiomyopathy	14/96	0.0438691	0.196763	1.7579	5.49615	ITGA4;ITGB3;CACNA2D3;ADCY2;ADCY1;CACNA1C;CACNA1F;TNF;CACNG8;ACTC1;PRKACG;ITGA7;ITGB6;CACNA1S
CvsSt	KEGG_2021_Human	Dopaminergic synapse	18/132	0.0442387	0.196763	1.62655	5.07183	GRIA1;CAMK2B;GRIA2;DDC;CALML5;MAOB;PRKCB;CAMK2A;CALML4;CACNA1C;PPP3CA;PLCB4;PPP2R1B;CALY;PPP2R2C;PRKACG;GNB4;GNB5
CvsSt	KEGG_2021_Human	Allograft rejection	7/38	0.0473868	0.207666	2.32227	7.08156	IL10;HLA-DMB;FAS;HLA-DRA;TNF;HLA-E;HLA-DQB1
CvsSt	KEGG_2021_Human	Tuberculosis	23/180	0.0485633	0.209737	1.50984	4.56711	IL10;CAMK2B;PLK3;CALML5;SPHK2;IFNGR2;CAMK2A;IL18;CALML4;TNF;C3;MRC2;PPP3CA;FCGR3B;HLA-DMB;IL1B;MRC1;HLA-DRA;ATP6V0A4;FCGR2B;TLR4;CAMP;HLA-DQB1
CvsSt	MGI_Mammalian_Phenotype_Level_4_2021	increased susceptibility to bacterial infection MP:0002412	42/193	3.83059e-08	0.000147554	2.89904	49.5087	C1QA;CERK;C5AR1;DAPP1;LY96;PLA2G7;LYST;TNF;C3;PLAC8;ADAMTS13;PDLIM2;CA2;TGM6;JAK3;CAMP;JAM3;IL10;GPR15;VWF;NOS3;PRKCE;TNFSF12;IFNGR2;IL18;TRPV2;CYBB;TRPV3;ANK1;HLA-E;MARCO;SLPI;IRF4;RASA4;IL1B;IFNE;LCN2;FAS;PADI4;LCP1;TLR4;CFTR
CvsSt	MGI_Mammalian_Phenotype_Level_4_2021	abnormal spatial learning MP:0001463	34/165	2.71808e-06	0.00523502	2.69569	34.5469	NLGN3;SNAP25;NDRG4;NXPH3;PDE1B;CAMK2A;SEZ6;RORA;NREP;ADCY1;CPLX2;KIF17;RYR3;HSD11B1;HRH3;NRCAM;APOD;FYN;NCAM1;APOE;CKB;NOS3;KCNIP3;CYBB;OPRM1;CPT1C;PTPRD;SLC6A7;VGF;DLG4;FAS;ATP13A2;ARHGEF6;HCN1
CvsSt	MGI_Mammalian_Phenotype_Level_4_2021	decreased startle reflex MP:0001489	48/277	5.29855e-06	0.00680334	2.1828	26.5168	CYFIP2;GRIA1;NLGN3;CLIC5;PALM3;TMEM51;AKAP7;RORA;ARR3;PTPRG;EDNRA;CDH4;MCIDAS;GPNMB;MDK;CASKIN1;SLITRK6;DPF3;APOE;CKB;BUB1;WNT10B;DDX59;PLK5;MREG;GINS3;LGI3;IQSEC3;CACNA2D3;ARHGAP29;SORBS2;MYO7A;NAV2;CPT1C;PRSS56;FOXP2;PEX5L;TYROBP;OAS1;DLG4;IRF4;AAK1;LNX1;TACC1;ALDOB;TOX;ASPA;CHST2
CvsSt	MGI_Mammalian_Phenotype_Level_4_2021	decreased interferon-gamma secretion MP:0008567	25/111	1.10416e-05	0.00979394	3.01124	34.3698	TNFRSF13C;TNF;PPP3CA;DHX58;PLCG2;FYN;APOE;JAK3;FADS1;DUSP4;XCR1;IL15;IL34;RFTN1;NPY1R;IL18;FOXN1;MMP9;CXCL10;TYROBP;TNFSF4;IL1B;IRF1;POU2AF1;LCP2
CvsSt	MGI_Mammalian_Phenotype_Level_4_2021	decreased prepulse inhibition MP:0009142	42/238	1.27128e-05	0.00979394	2.22788	25.1147	GRIA1;CAMK2B;COLEC12;CLIC5;FKBP10;SNAP25;LEF1;PALM3;GRIK4;TMEM51;ZDHHC8;GDPD5;EDNRA;OTOA;MCIDAS;GPNMB;MDK;HNF4A;TP53INP2;CASKIN1;DPF3;MAP6;SPOCK1;NRCAM;CKB;B2M;IQSEC3;HUNK;SORBS2;CCK;LRFN2;MAF;TYROBP;SLC7A8;NPC1;VGF;FABP7;ATG4B;TOX;ASPA;SLC24A5;RHOQ
CvsSt	MGI_Mammalian_Phenotype_Level_4_2021	decreased body weight MP:0001262	162/1329	1.60733e-05	0.0103191	1.46704	16.1938	KLB;CHRM2;VIPR1;CERK;SLC4A1;AQP5;IKZF2;TNF;LIPE;FADS2;GJA1;HOXA9;RIMS4;EDNRA;RASSF2;MCIDAS;NRCAM;GGT1;TLE4;CADPS2;SLC6A19;PHYH;FBXW8;IGFBP4;APLP1;LMTK3;CYBB;CHD1L;CPT1C;OVOL1;HSPG2;ANK1;MFSD12;FOXP2;RUNX2;TRHR;CLIP2;POR;PAPPA;AGTR1;KCTD11;IGFALS;RHCG;CFTR;SIDT2;GRIA1;GRIA2;INSIG1;FBLN1;AEBP1;GATA2;ADAMTS10;RASGRP3;C3;DPP4;SCUBE2;SOCS1;STK36;ADAMTS17;CASKIN1;ASL;ATP6V0A4;APOE;OTX1;SLC38A3;ZNF423;R…
CvsSt	MGI_Mammalian_Phenotype_Level_4_2021	decreased body size MP:0001265	106/805	2.34745e-05	0.0129177	1.59137	16.9633	RORA;SLC4A1;RORB;CELSR1;RIMS2;GJA1;EDNRA;ATCAY;EDNRB;MCIDAS;GGT1;SOX6;CDON;SLC6A19;PRKCE;WNT5A;MYO7A;CHD1L;OVOL1;ANK1;MFSD12;FOXP2;RUNX2;MAF;LMX1A;CFTR;SIDT2;GRIA1;GRIA2;FBLN1;GATA2;CPLX1;ADAMTS10;SCUBE2;SOCS1;STK36;ERI1;ADAMTS18;ADAMTS17;ATP6V0A4;SLC38A3;ZNF423;STRA6;EGR1;PLK2;PMM2;NR2F2;FOXN1;FOSL2;SMAD7;COL1A1;CDK6;DLG4;PAH;SP6;GNB5;FGFR1;MESP2;SNAP25;CLIC5;KIF14;DBH;SMPD3;MECOM;CA2;CA5A;HEY2;…
CvsSt	MGI_Mammalian_Phenotype_Level_4_2021	no abnormal phenotype detected MP:0002169	193/1654	3.54955e-05	0.0158495	1.39887	14.333	CYFIP2;FZD10;MKI67;GJA1;EDNRA;NDST3;KDR;DPF3;GSC2;TKTL1;GCAT;SLC5A7;NEIL3;PAPPA;KCTD11;PADI4;ZFPM1;CFTR;EPHA2;STC1;KLK3;GATA2;IGSF9;C3;ADAMTS13;EPB41L3;FLRT1;ASL;ST3GAL1;RAB11FIP5;XCR1;SRMS;ST8SIA1;PMM2;TYR;GP5;PRDX6;COL1A1;PEX5L;EHD3;CALY;PDE3A;MESP2;LRSAM1;CTSZ;STAB2;GRIK4;FMN1;MYPN;AKAP12;MRC2;SHH;MECOM;HNF4A;NEFL;TSPO;APOBEC1;IL10;VAV3;CHST7;SPHK2;EN1;DNTT;GPRC5A;MRAS;MMP15;TLR4;HLA-DQB1;HBEG…
CvsSt	MGI_Mammalian_Phenotype_Level_4_2021	abnormal hair shaft morphology MP:0003809	14/47	3.70316e-05	0.0158495	4.37991	44.6914	KRT71;FOXE1;RASSF9;KRT75;OVOL1;FOXN1;ASS1;SHH;KRT27;KRT25;PADI3;SP6;DSG4;TGM3
CvsSt	MGI_Mammalian_Phenotype_Level_4_2021	increased prostaglandin level MP:0009814	7/13	4.565e-05	0.0175844	12.0149	120.083	PTGIS;APC;ALOX5;ALOX5AP;APOE;MMP9;FADS1
CvsSt	MGI_Mammalian_Phenotype_Level_4_2021	increased CD4-positive, alpha beta T cell number MP:0008074	23/110	8.41342e-05	0.0270566	2.73522	25.6648	DUSP4;IL10;PRKCB;NPY1R;SLC1A5;TNF;FOXP2;DPP4;LGALS2;CD4;CDK6;CD8B;ANPEP;IRF1;COL10A1;CD48;APOE;GRAP;JAK3;ABCG1;HCN2;IFNAR1;HLA-DQB1
CvsSt	MGI_Mammalian_Phenotype_Level_4_2021	abnormal melanosome morphology MP:0005075	7/14	8.42886e-05	0.0270566	10.2979	96.6074	PMEL;GPR143;EDN3;KIT;TYR;LYST;SLC24A5
CvsSt	MGI_Mammalian_Phenotype_Level_4_2021	abnormal immune system physiology MP:0001790	23/111	9.73364e-05	0.0272315	2.70399	24.9777	IL10;IL15;GALNT1;ALOX15;GCNT1;NPY1R;CYBB;RORA;TNF;FOXN1;SLC7A2;C3;LGALS2;PTPRC;CRISPLD2;IRF4;IRF1;ALOX5;FAS;APOE;ITGB6;JAK3;HLA-DQB1
CvsSt	MGI_Mammalian_Phenotype_Level_4_2021	deformed nails MP:0000580	5/7	9.89722e-05	0.0272315	25.7228	237.181	MSX2;EN1;HOXC13;DSG4;FOXN1
CvsSt	MGI_Mammalian_Phenotype_Level_4_2021	curly vibrissae MP:0001274	9/24	0.000128105	0.0328974	6.18302	55.4163	KRT71;MSX2;HEPHL1;KRT27;KRT25;SP6;TRPV3;FOXN1;TGM3
CvsSt	MGI_Mammalian_Phenotype_Level_4_2021	abnormal synapse morphology MP:0009538	15/60	0.000180933	0.0435597	3.44104	29.6527	CTTNBP2;GPT2;CAMK2A;EN1;ZDHHC8;CACNA1F;IGSF9;LRFN2;SLC9A5;MARVELD1;ROR1;KIF21B;APOE;ERC2;ARHGEF6
CvsSt	MGI_Mammalian_Phenotype_Level_4_2021	enlarged spleen MP:0000691	62/444	0.000237269	0.0537623	1.68951	14.1012	SRPX;CHIC2;STEAP3;MOGAT2;ITGB3;SLC4A1;SLC2A5;TNF;FADS2;SPRED2;HEPHL1;IGLON5;RASSF5;PMEPA1;FAM3D;JAK3;TLE4;COL27A1;CAMK1D;PTGIS;RNASET2;NAV1;DUSP8;SPTB;ANK1;RUNX2;PROCR;MAF;RNF128;NPC1;MMP15;IRF4;KIT;AGTR1;PADI4;ZFPM1;CHST2;CCNO;PRKAA2;NNMT;SERPINC1;NLRC5;CACNA1C;CLN8;TSPAN33;NALCN;GPC1;BCO2;KCNN4;CDKN2C;NOS3;TNFSF12;LGI3;PTCH2;MERTK;KBTBD11;PTPRC;GNB4;FAS;PPT2;FCGR2B;PLCD1
CvsSt	MGI_Mammalian_Phenotype_Level_4_2021	increased susceptibility to Herpesvirales infection MP:0020916	12/43	0.000261636	0.0559901	3.99232	32.9309	AGBL4;CXCL10;PTPRC;TYROBP;IFNE;IRF1;PLCG2;LYST;JAK3;FOXN1;HLA-E;IFNAR1
CvsSt	MGI_Mammalian_Phenotype_Level_4_2021	diluted coat color MP:0000371	13/50	0.000316969	0.0608166	3.62452	29.2017	PMEL;TYRP1;SLC7A11;TYR;LYST;MFSD12;PTS;KITLG;DCT;MLANA;PAH;KIT;GGT1
CvsSt	MGI_Mammalian_Phenotype_Level_4_2021	decreased dendritic cell number MP:0008127	11/38	0.000330694	0.0608166	4.20034	33.6628	LMBR1L;MYCL;XCR1;IL15;IRF4;IL34;PRKCE;COL10A1;JAK3;MMP9;CAMP
CvsSt	MGI_Mammalian_Phenotype_Level_4_2021	postnatal lethality, incomplete penetrance MP:0011086	77/587	0.000334496	0.0608166	1.57414	12.5977	SNAP25;UPK2;ITGB3;SLC4A1;RORA;HOXC13;PRDM1;LMOD2;SMPD3;GJA1;SHH;EDNRB;HEY2;COL10A1;CNGA2;ZNF385A;CDON;EDN3;EN1;OVOL1;SPTB;ANK1;MFSD12;RUNX2;SCNN1G;POR;PLCB4;MAF;MYCN;VGF;DNAJC6;KIT;ADAM12;KCTD11;FAM20A;DSG4;MDFI;CFTR;HBEGF;GRIA2;SERPINC1;NEXN;FBLN1;GATA2;AGPAT2;COL19A1;PTS;LRP6;STK36;ERI1;HESX1;PLAGL2;TNNI2;ATP6V0A4;OTX1;ZNF423;TRPM6;JAM3;EGR3;FOXF1;NOS3;SPRY4;RASSF9;SORBS2;NR2F2;FOXN1;COL1A1;BMP…
CvsSt	MGI_Mammalian_Phenotype_Level_4_2021	waved hair MP:0000410	7/17	0.000376097	0.0608166	7.20735	56.8347	KRT71;FOXE1;KRT27;LIPH;KRT25;TRPV3;TGM3
CvsSt	MGI_Mammalian_Phenotype_Level_4_2021	abnormal blood-brain barrier function MP:0005167	8/22	0.000390608	0.0608166	5.88559	46.1889	VWF;HRH3;NOS3;IL1B;TNFRSF19;NOX4;APOE;MMP9
CvsSt	MGI_Mammalian_Phenotype_Level_4_2021	overexpanded pulmonary alveoli MP:0001183	10/33	0.0004087	0.0608166	4.48102	34.9633	SMPD3;ADAMTS18;FBLN1;RASSF9;ITGB6;LYST;LOXL1;FOXP2;ABCG1;FBN1
CvsSt	MGI_Mammalian_Phenotype_Level_4_2021	enhanced long term potentiation MP:0003008	14/58	0.000434647	0.0608166	3.28294	25.4132	GRIA2;KCNIP3;CAMK2A;NRG1;RYR3;AP3M2;C3;PTPRD;LRFN2;GAL;TYROBP;DLG4;PDE4B;EIF4G1
CvsSt	MGI_Mammalian_Phenotype_Level_4_2021	abnormal glucose homeostasis MP:0002078	30/178	0.000470972	0.0608166	2.09854	16.0763	KLB;SLC27A1;VIPR1;PRKAA2;TREH;DBH;TNF;AGPAT2;C3;HSD11B1;HRH3;FAM3B;ST3GAL5;APOE;GGT1;SLC13A5;IL10;GCKR;KCNJ11;NOS3;TSC22D3;NPY1R;SORBS1;ERN1;FABP3;CDK6;FABP4;NMU;CRH;TLR4
CvsSt	MGI_Mammalian_Phenotype_Level_4_2021	abnormal hair follicle inner root sheath morphology MP:0010685	6/13	0.000481965	0.0608166	8.82179	67.3777	KRT71;LIPH;KRT25;SP6;DSG4;FOXN1
CvsSt	MGI_Mammalian_Phenotype_Level_4_2021	increased triglyceride level MP:0005317	9/28	0.000488307	0.0608166	4.88026	37.2099	C3;LIPE;BHMT;FABP3;NMU;APOE;XDH;ABCG1;PNPLA1
CvsSt	MGI_Mammalian_Phenotype_Level_4_2021	abnormal pulmonary alveolus morphology MP:0002270	20/101	0.0005047	0.0608166	2.55111	19.3669	CLIC5;CAV2;FOXF1;NOS3;ABCA3;FBLN1;PRDX6;ADRA2B;ROBO1;HSD11B1;ADAL;SMPD3;HEY2;SP6;ROR1;APOE;TLR4;CFTR;FBN1;HBEGF
CvsSt	MGI_Mammalian_Phenotype_Level_4_2021	abnormal cranium morphology MP:0000438	26/147	0.000516163	0.0608166	2.2228	16.8246	EXOC3L2;DLX2;PTH;SATB2;COL11A2;AGAP1;FBLN1;LRP6;EDNRA;GJA1;SHH;STK36;PRKG2;OTX1;MSX1;STRA6;JAM3;PTCH1;FOXH1;TMEM132A;AXIN2;HSPG2;MFSD12;RUNX2;COL1A1;CDK6
CvsSt	MGI_Mammalian_Phenotype_Level_4_2021	postnatal lethality, complete penetrance MP:0011085	55/394	0.000522592	0.0608166	1.68605	12.741	CYFIP2;FOXE1;SLC23A1;KIF14;SLC4A1;RORA;GJA1;EDNRB;MECOM;HEY2;KDR;CNGA2;SOX6;EDN3;ATP1B2;ANK1;FOXP2;MAF;SLCO2A1;KIT;KCTD11;CFTR;GRIA2;LEF1;NEXN;CACNA1C;MLLT3;PTS;SOCS1;STK36;ADAM23;ASL;SLC38A3;ZNF423;XDH;STRA6;LGI1;KCNJ10;PTCH1;HS3ST1;FOSL2;BMP4;NFASC;TF;KITLG;ACTC1;APC;NPHS1;LPCAT3;PLP1;LHX6;DCHS1;NAGS;FBN1;FGFR1
CvsSt	MGI_Mammalian_Phenotype_Level_4_2021	abnormal blood homeostasis MP:0009642	21/109	0.000543267	0.0608166	2.46605	18.5395	VAV3;SLC14A1;PHYH;AHSG;GPX3;NOS3;SLC23A1;PMM2;NR1H4;SLC4A1;C3;SELENBP1;KITLG;AGTR1;CRH;KCTD11;ROR1;CYP2E1;UPP1;BCO2;XDH
CvsSt	MGI_Mammalian_Phenotype_Level_4_2021	abnormal eye physiology MP:0005253	15/66	0.000549781	0.0608166	3.03521	22.7822	SEMA4A;GUCY2D;KCNJ10;NOS3;RORB;CACNA1F;TYR;PRSS56;RLBP1;TRPM1;RDH12;NRTN;GJA8;GNAT1;RGS9
CvsSt	MGI_Mammalian_Phenotype_Level_4_2021	abnormal lipid homeostasis MP:0002118	24/132	0.000552058	0.0608166	2.29782	17.2379	APOBEC1;ACADVL;ABCA3;SLC10A2;HEXB;RORA;APOA4;TNF;AGPAT2;LRP6;C3;HSD11B1;LIPE;FABP3;NPC1;TNFSF4;HNF4A;NMU;ST3GAL5;ATG4B;APOD;APOE;ABCD1;XDH
CvsSt	MGI_Mammalian_Phenotype_Level_4_2021	abnormal leukocyte morphology MP:0008246	8/23	0.000552592	0.0608166	5.49291	41.2017	IL10;EGR1;PTPRC;TNFSF12;FAS;MMP9;JAK3;ABCG1
CvsSt	MGI_Mammalian_Phenotype_Level_4_2021	irregular coat pigmentation MP:0000372	7/18	0.000568443	0.0608234	6.55178	48.9589	EDAR;PMEL;KITLG;ELOVL3;KIT;TET1;TYR
CvsSt	MGI_Mammalian_Phenotype_Level_4_2021	decreased T cell number MP:0005018	27/157	0.000640895	0.0661657	2.14865	15.7982	LMBR1L;TNF;ADAL;PNP;RASSF2;PRSS50;ARHGDIB;SCMH1;MRC1;CCR9;FYN;JAK3;NUP210;ITGA4;GALNT1;MERTK;FOXN1;LRFN2;CD4;KITLG;PTPRC;CD8B;APC;IL7;POU2AF1;PLA2G10;LCP2
CvsSt	MGI_Mammalian_Phenotype_Level_4_2021	decreased cerebral infarction size MP:0006058	9/29	0.000652725	0.0661657	4.63599	34.002	C3;EGR1;OLFM1;DAPK1;GPX3;IL18;NOX4;APOE;TLR4
CvsSt	MGI_Mammalian_Phenotype_Level_4_2021	decreased circulating insulin level MP:0002727	52/373	0.00075327	0.067229	1.68224	12.0971	KLB;GLP1R;GPSM1;CLIC5;STEAP4;TTLL10;MOGAT2;GPR68;SLC7A13;TNF;RIMS2;LIPE;IL10;EMX1;SLC6A19;AHSG;ATG9B;DNTT;SLC9B2;VGF;TLR4;SIDT2;COLEC12;PRKAA2;SLC20A2;CTTNBP2;ALOX15;LEF1;AGAP1;FOXO6;ILDR2;SLC38A11;C3;LDHB;CASKIN1;SH3BP4;IGF2BP2;SLC38A3;SLC13A5;WNT3;GCKR;SPHKAP;KCNJ11;NOS3;NR1H4;COL1A1;PTPRD;AGBL4;FABP4;BFSP1;CDK6;KLF9
CvsSt	MGI_Mammalian_Phenotype_Level_4_2021	abnormal vibrissa morphology MP:0002098	15/68	0.000767823	0.067229	2.92035	20.9446	CHST8;KRT71;DLX6;KRT75;OVOL1;FOXN1;KITLG;HEPHL1;KRT27;KRT25;PADI3;CKB;ST6GALNAC3;TGM3;IFNAR1
CvsSt	MGI_Mammalian_Phenotype_Level_4_2021	intestinal obstruction MP:0003270	6/14	0.000780224	0.067229	7.71864	55.2341	VIPR1;EDNRB;APC;KIT;AGR2;CFTR
CvsSt	MGI_Mammalian_Phenotype_Level_4_2021	abnormal cardiovascular system morphology MP:0002127	12/48	0.000783741	0.067229	3.43689	24.5787	VAV3;EDNRA;SHH;ITGA4;NOS3;TNFSF4;HEY2;FBLN1;GATA4;DNAI1;FBN1;HBEGF
CvsSt	MGI_Mammalian_Phenotype_Level_4_2021	abnormal long bone hypertrophic chondrocyte zone MP:0000165	12/48	0.000783741	0.067229	3.43689	24.5787	SCUBE2;TLE4;CHST11;MSX2;PRKG2;TNNI2;NCDN;GGT1;HSPG2;MMP9;PAPSS2;RUNX2
CvsSt	MGI_Mammalian_Phenotype_Level_4_2021	abnormal prostaglandin level MP:0009811	4/6	0.000802839	0.067229	20.5666	146.585	ALOX5AP;PLA2G10;SLCO2A1;PTGES
CvsSt	MGI_Mammalian_Phenotype_Level_4_2021	absent molars MP:0003931	4/6	0.000802839	0.067229	20.5666	146.585	EDAR;WNT10A;LEF1;MSX1
CvsSt	MGI_Mammalian_Phenotype_Level_4_2021	decreased susceptibility to fungal infection MP:0005398	4/6	0.000802839	0.067229	20.5666	146.585	IL34;CCR4;LYST;S100A9
CvsSt	MGI_Mammalian_Phenotype_Level_4_2021	abnormal phospholipid level MP:0004777	9/30	0.00085969	0.0697127	4.41499	31.1651	C1QTNF2;BHMT;NPC1;PLP1;APOE;AGPAT2;PRDX6;ABCG1;CFTR
CvsSt	MGI_Mammalian_Phenotype_Level_4_2021	abnormal spleen morphology MP:0000689	53/385	0.000904332	0.0697127	1.65772	11.6178	STEAP3;CPNE5;MOGAT2;HHIP;TNF;SPRED2;HEPHL1;MCIDAS;IGLON5;COL10A1;PMEPA1;RTTN;JAK3;TLE4;COL27A1;CAMK1D;PTGIS;SERPINF1;NPY1R;NAV1;DUSP8;ANK1;C1QL2;MAF;IRF4;AGTR1;PADI4;TOX;ZFPM1;CHST2;CCNO;HLA-DQB1;NNMT;CACNA1C;GDPD5;CLN8;TSPAN33;NALCN;CACNA1I;SOCS1;PTCHD1;GPC1;GDF11;NOS3;LGI3;FOXN1;KBTBD11;AGBL4;CD4;GOLPH3;CDK6;ASB4;PPT2
CvsSt	MGI_Mammalian_Phenotype_Level_4_2021	decreased bleeding time MP:0005607	5/10	0.00094517	0.0697127	10.2874	71.643	NT5E;GDF15;GPX3;TYRP1;GP5
CvsSt	MGI_Mammalian_Phenotype_Level_4_2021	small molars MP:0006402	5/10	0.00094517	0.0697127	10.2874	71.643	EDAR;WNT10A;FAM20A;RUNX2;LRP6
CvsSt	MGI_Mammalian_Phenotype_Level_4_2021	abnormal lymph node morphology MP:0002339	24/137	0.000955042	0.0697127	2.19554	15.2672	TLE4;CADPS2;PTGIS;NOS3;ALOX15;FOXN1;TRAK2;LRFN2;HPGDS;HEPHL1;KRT28;KRT27;IRF4;IGLON5;GPC1;TP53INP2;NOX4;FAS;PADI4;CHST4;JAK3;GPR155;CHST2;EPHA2
CvsSt	MGI_Mammalian_Phenotype_Level_4_2021	abnormal coat/hair pigmentation MP:0002075	26/153	0.000959183	0.0697127	2.11708	14.7125	CHIC2;TYRP1;AP2A1;ADCY1;PRR9;LYST;MYOM2;MYPN;RLBP1;EDNRB;CASKIN1;GGT1;ZSWIM5;SLC6A19;DDX59;ELOVL3;OVOL1;TYR;PRSS56;EDAR;COL1A1;KITLG;PAH;KIT;INTS7;SLC24A5
CvsSt	MGI_Mammalian_Phenotype_Level_4_2021	decreased CD8-positive, alpha-beta T cell number MP:0008079	26/153	0.000959183	0.0697127	2.11708	14.7125	LMBR1L;NLRC5;ADAM28;PNP;RASSF2;PRSS50;NDST3;B2M;JAK3;CCR1;NUP210;ST8SIA1;IL15;NPY1R;CXCL10;LRFN2;CDK6;PTPRC;CD8B;IRF1;PLA2G10;FAS;LCP2;HCN2;ARHGEF6;HLA-DQB1
CvsSt	MGI_Mammalian_Phenotype_Level_4_2021	abnormal macrophage physiology MP:0002451	28/170	0.00103238	0.0736432	2.03974	14.025	GPR68;ITGB3;SLC40A1;LY96;RORA;SLC7A11;TNF;FADS2;SOCS1;ANPEP;MRC1;FYN;CCR1;DUSP4;MST1;NPY1R;IL18;CYBB;MARCO;NCEH1;RNF128;SLPI;IL1B;IRF1;LCP1;TLR4;ABCG1;IFNAR1
CvsSt	MGI_Mammalian_Phenotype_Level_4_2021	cataract MP:0001304	37/248	0.0012304	0.0861728	1.81638	12.1705	DOCK5;GPSM2;COL16A1;SLC20A2;AGAP1;TULP2;PTPRK;SEMA3F;SLC2A5;CLN8;PLAC8;FYCO1;SPRED2;GJA1;ADAMTS18;TP53INP2;HSF4;RTTN;GJA8;GGT1;ABCD1;TPK1;CTPS1;APTX;EDAR;BMP4;TF;FABP3;MAF;BFSP1;GPR161;PLA2G10;ATG4B;LCP2;NOTUM;ST6GALNAC3;EPHA2
CvsSt	MGI_Mammalian_Phenotype_Level_4_2021	abnormal myelination MP:0000920	17/86	0.00131636	0.0870711	2.54291	16.8668	GAL3ST1;KCNJ10;NRG1;CLN8;MMP9;NCALD;TYROBP;GJB1;PTPRC;NPC1;IL1B;PLP1;NRCAM;FYN;ABCD1;ASPA;PPARD
CvsSt	MGI_Mammalian_Phenotype_Level_4_2021	enlarged lymph nodes MP:0000702	35/232	0.00134988	0.0870711	1.83961	12.1557	SATB2;SLC2A5;TRAK2;SPRED2;KIAA1549;KRT28;KRT27;IGLON5;RASSF5;GPC1;TP53INP2;NEK2;JAK3;GPR155;TLE4;CADPS2;CDKN2C;PTGIS;NOS3;TNFSF12;PMM2;GTPBP2;ANK1;MFAP4;PTPRC;MAN2B2;IRF4;NOX4;FAS;PADI4;FCGR2B;CHST2;PLCD1;EPHA2;ARHGEF6
CvsSt	MGI_Mammalian_Phenotype_Level_4_2021	decreased tumor growth/size MP:0003447	12/51	0.0013923	0.0870711	3.17199	20.8615	GPNMB;APC;GPR68;CAV2;IL1B;KIT;CCM2L;PMEPA1;CYBB;ADAM9;LOXL2;IL12RB2
CvsSt	MGI_Mammalian_Phenotype_Level_4_2021	abnormal nervous system physiology MP:0003633	21/117	0.00140823	0.0870711	2.25954	14.8349	PHYH;NDRG4;LYNX1;EGR3;CHRNA4;NOS3;HEXB;CACNA2D3;RORA;CACNA1C;OPRM1;NCALD;PTS;SLC6A7;SLC9A5;PLCB4;HRH3;CCDC85C;APOD;ABCD1;JAM3
CvsSt	MGI_Mammalian_Phenotype_Level_4_2021	hepatic steatosis MP:0002628	26/157	0.0014121	0.0870711	2.05199	13.4665	SNAP25;ACADVL;STEAP4;TNF;AGPAT2;LRP6;C3;HSD11B1;SOCS1;HNF4A;NOS3;NR1H4;CPT1C;C1QTNF9B;POR;BHMT;DNAJC7;NPC1;APC;NMU;KIT;LCN2;CYP2E1;ALDOB;ABCG1;SIDT2
CvsSt	MGI_Mammalian_Phenotype_Level_4_2021	abnormal T cell subpopulation ratio MP:0003944	9/32	0.00143299	0.0870711	4.03063	26.3925	CD4;PTPRC;CD8B;IL7;TSC22D3;CCR9;LCP2;TNF;JAK3
CvsSt	MGI_Mammalian_Phenotype_Level_4_2021	decreased susceptibility to experimental autoimmune encephalomyelitis MP:0004800	14/65	0.00145271	0.0870711	2.83125	18.5003	CCR1;ZRANB1;RFTN1;SLC1A5;TNF;MMP9;HLA-E;TYROBP;SOCS1;HRH3;IRF1;CRH;HLA-DQB1;BCL2L1
CvsSt	MGI_Mammalian_Phenotype_Level_4_2021	premature death MP:0002083	103/869	0.00146369	0.0870711	1.40316	9.15814	MSI1;SLC4A1;TNF;RIMS2;GJA1;ATCAY;RASSF2;EDNRB;HEPHL1;GGT1;FADS1;CDON;TLE4;GPT2;HSPG2;ANK1;MFSD12;FOXP2;RUNX2;LMX1A;CFTR;GRIA2;ALOX15;CACNA1C;GATA2;CPLX1;ADAMTS13;SOCS1;STK36;EPB41L3;PLCG2;ASL;ATP6V0A4;APOE;OTX1;ZNF423;TRPM6;FOXF1;PTCH1;PMM2;EAF2;RASSF9;TYR;FOXN1;COL1A1;PTPRD;PTPRC;SP6;PPT2;SLC26A3;FBN1;SNAP25;ACADVL;HEXB;ITGB3;SLC40A1;DBH;LMOD2;AKAP12;PPP3CA;UCHL1;HEY2;PMEPA1;COL10A1;JAK3;IL10;ED…
CvsSt	MGI_Mammalian_Phenotype_Level_4_2021	irregular heartbeat MP:0001636	11/45	0.00156486	0.0870711	3.33428	21.5393	KCNH2;CDH5;ACADVL;GJA1;NRG1;CACNA1C;HSPG2;MYPN;HCN2;LMOD2;SMAD7
CvsSt	MGI_Mammalian_Phenotype_Level_4_2021	abnormal alisphenoid bone morphology MP:0003235	5/11	0.00160639	0.0870711	8.57237	55.1526	DLX2;EDNRA;GJA1;DLX6;FGFR1
CvsSt	MGI_Mammalian_Phenotype_Level_4_2021	absent coat pigmentation MP:0005171	5/11	0.00160639	0.0870711	8.57237	55.1526	KITLG;EDNRB;KIT;TYR;MFSD12
CvsSt	MGI_Mammalian_Phenotype_Level_4_2021	delayed female fertility MP:0008976	5/11	0.00160639	0.0870711	8.57237	55.1526	AKAP12;COL1A1;DNAJC6;NOS3;KIT
CvsSt	MGI_Mammalian_Phenotype_Level_4_2021	increased mast cell number MP:0000324	5/11	0.00160639	0.0870711	8.57237	55.1526	KITLG;KIT;AGR2;ENPP3;FBN1
CvsSt	MGI_Mammalian_Phenotype_Level_4_2021	abnormal female reproductive system physiology MP:0003699	7/21	0.00163789	0.0870711	5.14698	33.0145	C3;CDK6;AGR2;TET1;RORA;TNF;IDO1
CvsSt	MGI_Mammalian_Phenotype_Level_4_2021	rough coat MP:0010179	7/21	0.00163789	0.0870711	5.14698	33.0145	KRT71;KRT27;KRT25;PADI3;KRT75;DSG4;AGPAT2
CvsSt	MGI_Mammalian_Phenotype_Level_4_2021	decreased sensitivity to induced morbidity/mortality MP:0009764	12/52	0.00166607	0.0870711	3.09252	19.7837	SCUBE1;NOS3;IL1B;DHX58;PDE4B;CCM2L;NOX4;S1PR3;HSPA12A;TNF;ANK1;TLR4
CvsSt	MGI_Mammalian_Phenotype_Level_4_2021	decreased susceptibility to type IV hypersensitivity reaction MP:0005616	12/52	0.00166607	0.0870711	3.09252	19.7837	SEMA4A;CXCL10;TYROBP;IL15;IFNGR2;IL1B;IL34;TNFSF4;NPY1R;APOE;TNF;IDO1
CvsSt	MGI_Mammalian_Phenotype_Level_4_2021	abnormal cartilage morphology MP:0000163	10/39	0.00171701	0.0870711	3.55274	22.6209	SHH;EDNRB;CHST11;COL10A1;CACNA1S;OTX1;HSPG2;RUNX2;FOSL2;FBN1
CvsSt	MGI_Mammalian_Phenotype_Level_4_2021	decreased ear pigmentation MP:0011279	4/7	0.00174133	0.0870711	13.7103	87.103	KITLG;KIT;TYR;LYST
CvsSt	MGI_Mammalian_Phenotype_Level_4_2021	decreased susceptibility to weight loss MP:0010181	4/7	0.00174133	0.0870711	13.7103	87.103	KLB;NOX4;PADI4;TLR4
CvsSt	MGI_Mammalian_Phenotype_Level_4_2021	leptocytosis MP:0010175	4/7	0.00174133	0.0870711	13.7103	87.103	PPP1R15A;STEAP3;SLC40A1;TSPAN33
CvsSt	MGI_Mammalian_Phenotype_Level_4_2021	abnormal eye electrophysiology MP:0005551	21/119	0.00175335	0.0870711	2.21319	14.0454	CERKL;SEMA4A;GUCY2D;KCNJ10;GUCA1B;RORB;CACNA1F;MERTK;CPLX3;C3;TRPM1;BMP4;RDH12;RDH5;LRAT;PDE6B;GJA8;GNAT1;APOE;ASIC2;ERC2
CvsSt	MGI_Mammalian_Phenotype_Level_4_2021	abnormal liver morphology MP:0000598	43/306	0.00176312	0.0870711	1.69451	10.7443	NNMT;LRP1;SERPINC1;HEXB;SLC40A1;ZC3HAV1L;AEBP1;CACNA1C;CLN8;AGPAT2;LRP6;C3;ADAL;SPRED2;SOCS1;PPME1;IGLON5;GPC1;SCMH1;PMEPA1;EMB;BCO2;SLC13A5;TLE4;CAMK1D;NOS3;WNT5A;NR1H4;FOXN1;COL1A1;BHMT;GJB1;MAF;MYCN;NPC1;BAMBI;IRF4;CTH;PADI4;PPT2;ALDOB;CHST2;SIDT2
CvsSt	MGI_Mammalian_Phenotype_Level_4_2021	preweaning lethality, incomplete penetrance MP:0011110	81/661	0.0018261	0.0890398	1.45373	9.16661	KLB;GPSM2;CHIC2;VIPR1;LPGAT1;RORA;IKZF2;CELSR1;WFDC2;ROBO1;ELAVL3;CDH5;GJA1;EDNRB;MCIDAS;MDK;KRT27;CA4;CHP2;LRAT;EMB;CCDC92;JAK3;B2M;CDON;DENND2D;TGIF1;ZHX3;FBXW8;LRRC49;NRG1;CHD1L;GTPBP2;OVOL1;ANK1;F5;EDAR;TOX3;POR;NPC1;LMX1A;KIT;PADI2;ATG4B;TRIM59;ALDOB;ASPA;CAMK2B;SLC24A4;SLC20A2;SATB2;AGAP1;NEXN;SEMA3F;SOCS1;ADAM23;CASKIN1;SRGAP2;JAM3;EGR1;ZRANB1;CCL22;GALNT1;PDE2A;FOXN1;DNAJC18;SMAD7;COL1A1;…
CvsSt	MGI_Mammalian_Phenotype_Level_4_2021	decreased interleukin-2 secretion MP:0008688	11/46	0.00189421	0.0904576	3.23883	20.3041	PPP3CA;IL1B;POU2AF1;TNFSF4;COL10A1;FAS;FYN;LCP2;VSTM5;ARHGEF6;BCL2L1
CvsSt	MGI_Mammalian_Phenotype_Level_4_2021	increased susceptibility to parasitic infection MP:0005027	15/74	0.0019058	0.0904576	2.6225	16.4243	DUSP4;IL10;CCR1;IL15;RGS16;IL18;LYST;TNF;CD4;POU2AF1;KIT;FAS;APOE;GBP2;HLA-DQB1
CvsSt	MGI_Mammalian_Phenotype_Level_4_2021	abnormal T cell physiology MP:0002444	20/112	0.00192563	0.0904576	2.24473	14.0352	DUSP5;CDKN2C;ITGA4;NLRC5;SLC1A5;TNF;CXCL10;PSTPIP1;SOCS1;PTPRC;FAS;LCP2;FYN;KCNN4;BCAT1;JAK3;NSMAF;BCL2L1;ARHGEF6;HLA-DQB1
CvsSt	MGI_Mammalian_Phenotype_Level_4_2021	abnormal enzyme/coenzyme level MP:0005319	12/53	0.00198258	0.0909156	3.01692	18.7754	ADAL;C3;COL1A1;POR;GCKR;NPC1;PAH;SLC40A1;CCK;UPP1;AMPD3;ASPA
CvsSt	MGI_Mammalian_Phenotype_Level_4_2021	abnormal iris morphology MP:0001322	12/53	0.00198258	0.0909156	3.01692	18.7754	BMP4;CLIC5;GJA1;SLC20A2;GPNMB;TYRP1;AGAP1;NRG1;GJA8;OTX1;LYST;LOXL1
CvsSt	MGI_Mammalian_Phenotype_Level_4_2021	abnormal CD8-positive, alpha beta T cell morphology MP:0005010	9/34	0.00227926	0.101399	3.70778	22.5577	DUSP5;CD4;PTPRC;CD8B;IL7;LY75;TOX;TNF;FOXN1
CvsSt	MGI_Mammalian_Phenotype_Level_4_2021	abnormal hair follicle morphology MP:0000377	13/61	0.0023416	0.101399	2.79221	16.9122	KRT71;ELOVL3;LEF1;KRT75;FOXN1;ASS1;EDAR;SHH;KRT25;ASL;ITGB6;DSG4;PLCD1
CvsSt	MGI_Mammalian_Phenotype_Level_4_2021	abnormal lung development MP:0001176	16/83	0.002362	0.101399	2.46364	14.9007	FOXF1;SLC23A1;ABCA3;WNT5A;FBLN1;GATA4;LYST;ADRA2B;ROBO1;HSD11B1;SHH;MYCN;STK36;ADAMTS18;CRH;FBN1
CvsSt	MGI_Mammalian_Phenotype_Level_4_2021	abnormal retinal pigment epithelium morphology MP:0005201	16/83	0.002362	0.101399	2.46364	14.9007	SEMA4A;MSX2;SERPINC1;MSI1;MYO7A;CLN8;MERTK;LYST;GPR143;CDK20;ADAM9;APOE;PPT2;TLR4;SLC24A5;STRA6
CvsSt	MGI_Mammalian_Phenotype_Level_4_2021	decreased physiological sensitivity to xenobiotic MP:0008874	23/138	0.00237136	0.101399	2.06606	12.4879	CHRM2;IL10;SPHK2;NOS3;GRIK4;EN1;TNFRSF10A;OPRM1;NALCN;MMP9;HRH3;KIF26A;CTH;KIT;AGTR1;LCN2;NOX4;KCTD11;CYP2E1;UPP1;MAP3K6;CYP2F1;KCNK2
CvsSt	MGI_Mammalian_Phenotype_Level_4_2021	decreased trabecular bone mass MP:0010873	6/17	0.00254766	0.101399	5.61263	33.5219	IL10;TLE4;TMEM178A;MGP;TNNI2;CTHRC1
CvsSt	MGI_Mammalian_Phenotype_Level_4_2021	increased lung compliance MP:0010895	6/17	0.00254766	0.101399	5.61263	33.5219	SMPD3;MFAP4;APOE;TLR4;CFTR;FBN1
CvsSt	MGI_Mammalian_Phenotype_Level_4_2021	abnormal aorta tunica media morphology MP:0009873	5/12	0.0025534	0.101399	7.34734	43.866	VAV3;PTGIS;MGP;CYBB;FBN1
CvsSt	MGI_Mammalian_Phenotype_Level_4_2021	abnormal cerebellar granule cell migration MP:0009977	5/12	0.0025534	0.101399	7.34734	43.866	CADPS2;MARVELD1;KIF14;ASS1;ASTN1
CvsSt	MGI_Mammalian_Phenotype_Level_4_2021	abnormal fatty acids level MP:0005280	5/12	0.0025534	0.101399	7.34734	43.866	LIPE;SLC27A1;AGPAT2;TLR4;LRP6
CvsSt	MGI_Mammalian_Phenotype_Level_4_2021	abnormal hair cuticle MP:0003810	5/12	0.0025534	0.101399	7.34734	43.866	LIPH;SP6;KRT75;FOXN1;TGM3
CvsSt	MGI_Mammalian_Phenotype_Level_4_2021	abnormal intestinal lipid absorption MP:0005342	5/12	0.0025534	0.101399	7.34734	43.866	C3;MOGAT2;SLC10A2;PLAGL2;CEL
CvsSt	MGI_Mammalian_Phenotype_Level_4_2021	low mean erythrocyte cell number MP:0002594	5/12	0.0025534	0.101399	7.34734	43.866	KITLG;KIT;SLC4A1;ANK1;SPTB
CvsSt	MGI_Mammalian_Phenotype_Level_4_2021	increased sensitivity to induced morbidity/mortality MP:0009763	28/181	0.00268597	0.105575	1.89194	11.1997	ACADVL;CERK;C5AR1;LY75;TNF;C3;FADS2;ADAM28;DHX58;APOD;ENPP3;IL10;KCNJ11;GPX3;GDF15;NR1H4;MERTK;FNDC5;MARCO;FABP3;SLPI;CTH;KIT;LCN2;FAS;ALDOB;RHCG;KCNK2
CvsSt	MGI_Mammalian_Phenotype_Level_4_2021	abnormal incisor morphology MP:0005358	11/48	0.00272201	0.105911	3.06343	18.0938	EDAR;EXOC3L2;GJA1;WNT10A;SATB2;AMBN;SPRY4;SP6;FAM20A;AGPAT2;RUNX2
CvsSt	MGI_Mammalian_Phenotype_Level_4_2021	increased blood urea nitrogen level MP:0005565	29/190	0.00279342	0.107602	1.86238	10.9517	GRIA1;MAPKBP1;NDRG4;UPK2;SLC4A1;SLC7A2;PPP3CA;ATP6V0A4;SLC38A3;XDH;CCR1;SLC14A1;CAMK1D;PTGIS;FBXW8;NOS3;PMM2;C1GALT1;CYBB;MYO7A;ANK1;SPTB;CTH;AGTR1;FAS;KCTD11;PPT2;PDE7B;SLC26A3
CvsSt	MGI_Mammalian_Phenotype_Level_4_2021	decreased exploration in new environment MP:0001417	36/251	0.00282202	0.107628	1.73302	10.1734	GRIA1;GRIA2;LPGAT1;LRP1;CAMK2A;ZDHHC8;RORB;CACNA1C;CPLX2;C3;KIAA1549;ABLIM3;APOE;CKB;FADS1;SYBU;RAB11FIP5;CHST8;CADPS2;EMX1;KCNJ11;NPY1R;SORBS2;BAZ1A;NAV2;FOXP2;TOX3;SLC6A7;PLCB4;SLC9A5;NPC1;KIFC1;CTH;LRRN1;RAMP1;ASPA
CvsSt	MGI_Mammalian_Phenotype_Level_4_2021	abnormal lung morphology MP:0001175	23/140	0.00286492	0.108193	2.03052	11.8891	COL27A1;CLSTN3;CAV2;FOXF1;NOS3;HHIP;GATA4;CELSR1;TNF;WFDC2;ROBO1;AKAP12;MFAP4;SHH;MYCN;NPC1;MGP;CRH;NOX4;ITGB6;ABCG1;CFTR;FBN1
CvsSt	MGI_Mammalian_Phenotype_Level_4_2021	abnormal synaptic plasticity MP:0004859	7/23	0.00294944	0.109243	4.50311	26.2357	CAMK2B;C3;LRFN2;UCHL1;DLG4;CAMK2A;FOXP2
CvsSt	MGI_Mammalian_Phenotype_Level_4_2021	decreased acute inflammation MP:0005087	7/23	0.00294944	0.109243	4.50311	26.2357	GGT5;EDNRB;ALOX5;IL1B;ALOX5AP;HPSE;TLR4
CvsSt	MGI_Mammalian_Phenotype_Level_4_2021	abnormal fertility/fecundity MP:0002161	14/70	0.00303084	0.111189	2.57775	14.9482	CHST8;SYCP2;NOS3;HEXB;EN1;RORA;ADRA2B;SYT7;SLC9A2;BMP4;COL1A1;CPEB1;CDK6;LMX1A
CvsSt	MGI_Mammalian_Phenotype_Level_4_2021	impaired neutrophil recruitment MP:0008719	10/42	0.0031116	0.112372	3.21914	18.5829	CCR1;CDH5;ALOX5;C5AR1;ALOX5AP;KIT;PDE4B;LY96;ST3GAL6;PIK3R5
CvsSt	MGI_Mammalian_Phenotype_Level_4_2021	abnormal cytokine secretion MP:0003009	22/133	0.00320404	0.112372	2.04673	11.7551	IL10;SEMA4A;DUSP2;IL15;TNFSF12;TNF;MMP9;DUSP14;CXCL10;HPGDS;SOCS1;PTPRC;TNFSF4;CRH;FYN;CCR4;TLR4;RAMP1;ABCG1;IDO1;IFNAR1;HLA-DQB1
CvsSt	MGI_Mammalian_Phenotype_Level_4_2021	impaired hearing MP:0006325	18/101	0.00323134	0.112372	2.23788	12.8339	TECTB;TGIF1;SNAP25;KCNJ10;WHRN;COL11A2;MYO7A;CELSR1;BMP4;COL1A1;EDNRA;OTOA;LMX1A;MECOM;SLC7A8;OCM;ATP6V0A4;SLC26A5
CvsSt	MGI_Mammalian_Phenotype_Level_4_2021	abnormal foot pigmentation MP:0009379	4/8	0.00323814	0.112372	10.2822	58.9452	KITLG;EDNRB;KIT;LYST
CvsSt	MGI_Mammalian_Phenotype_Level_4_2021	brittle hair MP:0003848	4/8	0.00323814	0.112372	10.2822	58.9452	HOXC13;DSG4;FOXN1;TGM3
CvsSt	MGI_Mammalian_Phenotype_Level_4_2021	brittle teeth MP:0000126	4/8	0.00323814	0.112372	10.2822	58.9452	GJA1;MSX2;SATB2;SP6
CvsSt	MGI_Mammalian_Phenotype_Level_4_2021	abnormal thymus cell ratio MP:0008827	6/18	0.00353727	0.120539	5.14463	29.0384	DOCK10;IL15;TSC22D3;IRF1;RASSF5;JAK3
CvsSt	MGI_Mammalian_Phenotype_Level_4_2021	syndactyly MP:0000564	13/64	0.00365174	0.120539	2.62753	14.7471	NOS3;DLX6;PTCH1;WNT5A;TMEM132A;EN1;FMN1;PCSK5;COL1A1;GJA1;SHH;SP6;FGFR1
CvsSt	MGI_Mammalian_Phenotype_Level_4_2021	abnormal tooth morphology MP:0002100	15/79	0.0037047	0.120539	2.41695	13.5305	EXOC3L2;DDC;AMBN;GFPT2;AGAP1;RLBP1;MMP20;EDAR;GJA1;PPP2R1B;ADAM23;SP6;ATG4B;CYP2E1;MSX1
CvsSt	MGI_Mammalian_Phenotype_Level_4_2021	abnormal immune system morphology MP:0000685	10/43	0.00373766	0.120539	3.12142	17.4465	C3;HEPHL1;IL15;CRISPLD2;IRF1;FAS;DNTT;APOE;FOXN1;HLA-DQB1
CvsSt	MGI_Mammalian_Phenotype_Level_4_2021	abnormal lymphocyte physiology MP:0003945	10/43	0.00373766	0.120539	3.12142	17.4465	SOCS1;ITGA4;RASSF5;IL1B;IRF1;TNFRSF13C;TNF;JAK3;IL12RB2;HLA-DQB1
CvsSt	MGI_Mammalian_Phenotype_Level_4_2021	thin skin MP:0001199	8/30	0.00376544	0.120539	3.74373	20.8971	KRT71;LEF1;CRH;PMEPA1;GFRA1;FOXN1;GFRA2;PPARD
CvsSt	MGI_Mammalian_Phenotype_Level_4_2021	absent visceral yolk sac blood islands MP:0001721	5/13	0.00384805	0.120539	6.42857	35.7441	BMP4;LMO2;KDR;F5;FGFR1
CvsSt	MGI_Mammalian_Phenotype_Level_4_2021	decreased neurotransmitter release MP:0003990	5/13	0.00384805	0.120539	6.42857	35.7441	AP3M2;UCHL1;CHRNA4;NOS3;DLG4
CvsSt	MGI_Mammalian_Phenotype_Level_4_2021	decreased prostaglandin level MP:0009815	5/13	0.00384805	0.120539	6.42857	35.7441	FADS2;PTGIS;NOS3;FADS1;PTGES
CvsSt	MGI_Mammalian_Phenotype_Level_4_2021	abnormal lung saccule morphology MP:0010825	7/24	0.00384899	0.120539	4.23799	23.563	SHH;FOXF1;ABCA3;KCNJ13;GATA4;RASSF9;CELSR1
CvsSt	MGI_Mammalian_Phenotype_Level_4_2021	decreased metastatic potential MP:0001273	7/24	0.00384899	0.120539	4.23799	23.563	IL1B;CCM2L;STAB2;CYBB;LYST;MMP9;JAM3
CvsSt	MGI_Mammalian_Phenotype_Level_4_2021	induced hyperactivity MP:0008911	7/24	0.00384899	0.120539	4.23799	23.563	GRIA1;DDC;FABP7;MAP6;OPRM1;CPLX2;IFNAR1
CvsSt	MGI_Mammalian_Phenotype_Level_4_2021	decreased brain size MP:0000774	21/127	0.00393861	0.121272	2.04525	11.3244	NLGN3;DAGLA;GPT2;KIF14;FRS2;NAV1;DUSP8;SPTB;FOXP2;LMNB2;NCALD;ARHGAP33;ASPM;SHH;LMX1A;NPC1;GPC1;NCAM1;OTX1;ZNF423;PPARD
CvsSt	MGI_Mammalian_Phenotype_Level_4_2021	abnormal dendritic cell physiology MP:0002376	17/95	0.00396581	0.121272	2.24838	12.4336	CCL22;XCR1;IL15;SLC7A11;MMP9;ADAL;MYCL;MARCO;TYROBP;GPNMB;RASSF5;PLCG2;APOE;JAK3;HLA-DQB1;IDO1;IFNAR1
CvsSt	MGI_Mammalian_Phenotype_Level_4_2021	abnormal dendrite morphology MP:0008143	14/72	0.00396684	0.121272	2.48859	13.7614	GRIA1;CAMK2A;SEZ6;SORBS2;ZDHHC8;FOXP2;ARHGAP33;MARVELD1;DPYSL2;KIF21B;APOE;SRGAP2;CAMK1G;ARHGEF6
CvsSt	MGI_Mammalian_Phenotype_Level_4_2021	decreased bone mass MP:0004016	9/37	0.00424383	0.128718	3.30997	18.08	COL1A1;RASSF2;TMEM178A;MGP;FHL2;COL10A1;GGT1;RUNX2;CTHRC1
CvsSt	MGI_Mammalian_Phenotype_Level_4_2021	reduced long term potentiation MP:0001473	20/120	0.00440276	0.132496	2.06424	11.1996	GRIA1;CAMK2B;CAMK2A;CYBB;OPRM1;CPLX2;KIF17;MMP9;SHISA7;IGSF11;CACNG8;EFNB3;DPYSL4;PRKAR1B;NETO1;TSPAN7;ST8SIA4;CNGA2;FYN;ARHGEF6
CvsSt	MGI_Mammalian_Phenotype_Level_4_2021	abnormal liver physiology MP:0000609	18/104	0.00446202	0.132941	2.15946	11.6873	KLB;IL10;EGR1;NOS3;SLC10A2;SLC40A1;NR1H4;TNF;C1QTNF9B;LRP6;C3;C1QTNF2;GJB1;LPCAT3;FAS;APOE;SLC13A5;TLR4
CvsSt	MGI_Mammalian_Phenotype_Level_4_2021	abnormal blood coagulation MP:0002551	11/51	0.00448659	0.132941	2.8332	15.3182	C3;PROCR;ADAMTS13;VWF;SERPINC1;ITGB3;FGL2;PRDX6;ZNF385A;KNG1;F5
CvsSt	MGI_Mammalian_Phenotype_Level_4_2021	short tibia MP:0002764	31/214	0.00457716	0.13459	1.75136	9.43402	FMN1;SLC7A2;SCUBE2;SPRED2;SHH;ADAMTS17;SEC14L5;PRKG2;S1PR3;CHAC1;GGT1;SLC13A5;TRPM6;EGR1;RBFOX1;WNT10A;MSX2;AHSG;IQSEC3;SPRY4;MMP9;SYT17;GOLPH3;SLC7A8;VGF;AAK1;ZNF831;FAM20A;KBTBD8;FBN1;FGFR1
CvsSt	MGI_Mammalian_Phenotype_Level_4_2021	abnormal response/metabolism to endogenous compounds MP:0003638	15/81	0.00473404	0.137583	2.34345	12.5444	NOS3;TNFRSF19;MMP9;HLA-E;ERN1;NT5E;FABP7;PAH;KIT;ADORA1;AGTR1;NOX4;ADAM8;ITGB6;HLA-DQB1
CvsSt	MGI_Mammalian_Phenotype_Level_4_2021	abnormal molar morphology MP:0002689	6/19	0.00478613	0.137583	4.74863	25.3673	EDAR;WNT10A;SATB2;FAM20A;NOTUM;RUNX2
CvsSt	MGI_Mammalian_Phenotype_Level_4_2021	decreased colon length MP:0013956	6/19	0.00478613	0.137583	4.74863	25.3673	FNDC4;GPR35;ADAMTS18;WNT5A;FAM3D;ENPP3
CvsSt	MGI_Mammalian_Phenotype_Level_4_2021	abnormal limb morphology MP:0002109	16/89	0.00487004	0.138959	2.2604	12.0358	NOS3;WNT5A;SPRY4;TMEM132A;EN1;FMN1;FRS2;AXIN2;PCSK5;TNF;LRP6;SMPD3;COL1A1;CYP26B1;SHH;FGFR1
CvsSt	MGI_Mammalian_Phenotype_Level_4_2021	abnormal gait MP:0001406	50/389	0.00510889	0.143219	1.52833	8.06468	CLIC5;VIPR1;CERK;CLSTN3;HEXB;KIF14;TMEM51;RORA;RORB;LYST;UCHL1;ATCAY;PHYH;DAPK1;EN1;MYO7A;SEZ6L;HSPG2;PLCB4;NPC1;GAN;ASPA;SCN4B;CFTR;IFNAR1;GRIA1;NDRG4;UHRF1;ADCY1;SEMA3F;CPLX2;EFNB3;PTCHD1;MARVELD1;EPB41L3;CASKIN1;GPR156;ZNF423;JAM3;EGR3;WHRN;DMRT3;GDAP1;ASS1;COL1A1;MARCO;PLP1;ATP13A2;HCN2;HCN1
CvsSt	MGI_Mammalian_Phenotype_Level_4_2021	arrested B cell differentiation MP:0001802	9/38	0.00513091	0.143219	3.19566	16.849	DOCK10;IL7;IRF4;POU2AF1;KIT;PLCG2;TNFRSF13C;POU2F2;JAK3
CvsSt	MGI_Mammalian_Phenotype_Level_4_2021	thick pulmonary interalveolar septum MP:0001179	9/38	0.00513091	0.143219	3.19566	16.849	DPP4;NPC1;CAV2;NOS3;ABCA3;CRH;ADRA2B;ROBO1;FBN1
CvsSt	MGI_Mammalian_Phenotype_Level_4_2021	decreased susceptibility to induced arthritis MP:0003436	11/52	0.00524331	0.145005	2.76395	14.5129	C3;DUSP2;TYROBP;IRF1;KIT;ALOX5AP;PLCG2;ADAM8;TNF;MMP9;TLR4
CvsSt	MGI_Mammalian_Phenotype_Level_4_2021	absent cochlear microphonics MP:0004413	4/9	0.00542077	0.145005	8.22528	42.9156	USH1G;WHRN;MYO7A;SLC26A5
CvsSt	MGI_Mammalian_Phenotype_Level_4_2021	increased airway resistance MP:0010935	4/9	0.00542077	0.145005	8.22528	42.9156	ADAL;APOE;AQP5;CCR4
CvsSt	MGI_Mammalian_Phenotype_Level_4_2021	increased erythrocyte protoporphyrin level MP:0011188	4/9	0.00542077	0.145005	8.22528	42.9156	KITLG;KIT;ANK1;SPTB
CvsSt	MGI_Mammalian_Phenotype_Level_4_2021	increased susceptibility to Poxviridae infection MP:0020928	4/9	0.00542077	0.145005	8.22528	42.9156	AGBL4;IRF1;TNF;IFNAR1
CvsSt	MGI_Mammalian_Phenotype_Level_4_2021	thick pulmonary valve MP:0010601	4/9	0.00542077	0.145005	8.22528	42.9156	GJA1;GALNT1;HEY2;GATA4
CvsSt	MGI_Mammalian_Phenotype_Level_4_2021	abnormal molar cusp morphology MP:0030457	5/14	0.00555241	0.146492	5.71397	29.6756	EDAR;WNT10A;SP6;FAM20A;LRP6
CvsSt	MGI_Mammalian_Phenotype_Level_4_2021	thick aortic valve MP:0010594	5/14	0.00555241	0.146492	5.71397	29.6756	GJA1;GALNT1;HEY2;GATA4;TNF
CvsSt	MGI_Mammalian_Phenotype_Level_4_2021	abnormal hair follicle development MP:0003704	8/32	0.00577121	0.150887	3.43137	17.6883	EDAR;CYP26B1;SHH;LEF1;EN1;FOXN1;ASS1;PPARD
CvsSt	MGI_Mammalian_Phenotype_Level_4_2021	enlarged thymus MP:0000709	12/60	0.00583706	0.150887	2.57596	13.2495	SLC24A4;GOLPH3;PTGIS;CDK6;HEPHL1;KRT27;IRF4;FAS;TNFRSF10A;KRT31;RUNX2;CHST2
CvsSt	MGI_Mammalian_Phenotype_Level_4_2021	increased cell proliferation MP:0000351	12/60	0.00583706	0.150887	2.57596	13.2495	COL1A1;EDNRB;EHD4;APC;DAPL1;GALNT1;CAMK2A;AGR2;EN1;TNF;SLC26A3;LTF
CvsSt	MGI_Mammalian_Phenotype_Level_4_2021	increased or absent threshold for auditory brainstem response MP:0011967	29/200	0.00587567	0.150887	1.7525	9.00249	CLIC5;GPSM2;COL11A2;CELSR1;SYNE4;CPLX1;EDNRA;SLITRK6;ATP6V0A4;APOE;TGIF1;KCNJ10;WHRN;MYO7A;FOXN1;BMP4;SLC7A8;LMX1A;USH1G;CLDN14;KIT;OCM;KCNQ4;FAS;ROR1;ASPA;HCN2;FGFR1;SLC26A5
CvsSt	MGI_Mammalian_Phenotype_Level_4_2021	abnormal urine homeostasis MP:0009643	15/83	0.00598413	0.152416	2.27428	11.6412	VAV3;SLC13A2;SLC14A1;SLC6A19;MAOB;UPK2;SLC23A1;SLC4A1;BHMT;PAH;SLCO2A1;CRH;KCTD11;ATP6V0A4;XDH
CvsSt	MGI_Mammalian_Phenotype_Level_4_2021	decreased tumor necrosis factor secretion MP:0008561	16/91	0.00607739	0.152416	2.19988	11.2264	CCR1;PRKCE;IL18;LY96;TNF;IL1B;DHX58;PDE4B;PLCG2;NOX4;APOE;CCR4;TLR4;FADS1;HLA-DQB1;IFNAR1
CvsSt	MGI_Mammalian_Phenotype_Level_4_2021	deafness MP:0001967	17/99	0.00609581	0.152416	2.13823	10.9053	TGIF1;CLIC5;GPSM2;WHRN;MYO7A;CELSR1;IKZF2;EDNRB;LMX1A;MECOM;USH1G;CLDN14;KIT;OCM;ROR1;APOE;SLC26A5
CvsSt	MGI_Mammalian_Phenotype_Level_4_2021	abnormal mast cell physiology MP:0002423	9/39	0.00615509	0.152416	3.08896	15.7243	C3;DUSP2;CMA1;KIT;LCN2;PADI2;PIP5K1B;ENPP3;FCGR2B
CvsSt	MGI_Mammalian_Phenotype_Level_4_2021	increased lung adenocarcinoma incidence MP:0002027	10/46	0.00622865	0.152416	2.86083	14.529	SRPX;PLK3;TPX2;DOK2;CDKN2C;GPRC5A;RASSF5;EAF2;LZTS1;ROBO1
CvsSt	MGI_Mammalian_Phenotype_Level_4_2021	decreased susceptibility to induced thrombosis MP:0031120	7/26	0.00625318	0.152416	3.79147	19.2404	FADS2;SCUBE1;VWF;ITGB3;TSPAN18;MERTK;KNG1
CvsSt	MGI_Mammalian_Phenotype_Level_4_2021	increased spleen weight MP:0004952	23/149	0.00628675	0.152416	1.88454	9.55333	PPP1R15A;EGR1;STEAP3;ALOX15;NR1H4;CYBB;TMEM51;TNF;ANK1;AGPAT2;PROCR;AGBL4;BHMT;TST;AGTR1;LCN2;FAS;APOE;PPT2;BCO2;KCNN4;ZFPM1;TLR4
CvsSt	MGI_Mammalian_Phenotype_Level_4_2021	abnormal hippocampus CA3 region morphology MP:0008267	6/20	0.00633087	0.152416	4.4092	22.3208	C3;GRIA2;SNAP25;LMX1A;NPC1;NCAM1
CvsSt	MGI_Mammalian_Phenotype_Level_4_2021	decreased susceptibility to ischemic brain injury MP:0006059	6/20	0.00633087	0.152416	4.4092	22.3208	VWF;DAPK1;GPX3;NOX4;MMP9;TLR4
CvsSt	MGI_Mammalian_Phenotype_Level_4_2021	jerky movement MP:0005424	6/20	0.00633087	0.152416	4.4092	22.3208	DDC;KCNJ10;DMRT3;MYO7A;PPT2;ASPA
CvsSt	MGI_Mammalian_Phenotype_Level_4_2021	abnormal renal glomerulus morphology MP:0005325	18/108	0.00667799	0.159774	2.06303	10.3336	CCR1;CLIC5;NOS3;C1GALT1;CYBB;FBLN1;CORO2B;BMP4;NPHS1;KIT;MGP;PMEPA1;FAS;KCTD11;ASL;APOE;XDH;IDO1
CvsSt	MGI_Mammalian_Phenotype_Level_4_2021	lethargy MP:0005202	16/92	0.00676587	0.160877	2.17081	10.8451	CLIC5;GRIA2;HEXB;SLC23A1;ABCA3;POU2F2;COL19A1;F5;SCNN1G;NT5E;COL10A1;ASL;SLC38A3;ASPA;IFNAR1;JAM3
CvsSt	MGI_Mammalian_Phenotype_Level_4_2021	perinatal lethality, incomplete penetrance MP:0011090	33/238	0.00689464	0.16198	1.66415	8.28251	SLC23A1;ITGB3;FMN1;FBLN1;AEBP1;GATA2;MLLT3;GJA1;SHH;MECOM;DVL2;SOX6;BUB1;CDON;JAM3;EN1;DIO3;NR2F2;ANK1;HSPG2;FOXP2;SMAD7;BMP4;KITLG;MAF;BMP1;NPHS1;KIT;LCP2;SCN4A;ZFPM1;HBEGF;FGFR1
CvsSt	MGI_Mammalian_Phenotype_Level_4_2021	respiratory distress MP:0001954	26/176	0.00689705	0.16198	1.79019	8.90915	DLX2;DGKD;FBLN1;WFDC2;LMOD2;DPP4;SMPD3;CYP26B1;EDNRB;CHST11;TUBB3;ADAMTSL2;HEY2;MSX1;SOX6;FBXW8;FOXF1;NOS3;ABCA3;COL1A1;ALDH1A3;MYCN;ROR1;SCN4A;MDFI;FBN1
CvsSt	MGI_Mammalian_Phenotype_Level_4_2021	abnormal common myeloid progenitor cell morphology MP:0006410	11/54	0.00705678	0.16198	2.6351	13.0537	CDH5;LRFN2;HOXA9;KITLG;MECOM;LMO2;OPRM1;MXD1;ANK1;ZFPM1;PLCD1
CvsSt	MGI_Mammalian_Phenotype_Level_4_2021	abnormal forelimb morphology MP:0000550	11/54	0.00705678	0.16198	2.6351	13.0537	BMP4;COL1A1;FKBP10;CYP26B1;GOLPH3;TNNI2;FMN1;PCSK5;HSPG2;LRP6;FGFR1
CvsSt	MGI_Mammalian_Phenotype_Level_4_2021	abnormal locomotor behavior MP:0001392	24/159	0.00705689	0.16198	1.83551	9.09268	GRIA1;SNAP25;NXPH3;HEXB;CAMK2A;SEZ6;ADCY1;CPLX2;CLN8;COL1A1;TF;CDK6;PLCB4;VGF;PTCHD1;CRTAC1;COL6A1;NEK2;KCTD11;KCTD12;APOE;TLR4;KCNK2;HCN1
CvsSt	MGI_Mammalian_Phenotype_Level_4_2021	impaired swimming MP:0001522	13/69	0.00710288	0.16198	2.39227	11.8352	CLIC5;WHRN;SEZ6;DMRT3;MYO7A;NREP;LYST;PTPRD;USH1G;MARVELD1;PAH;ATG4B;HCN2
CvsSt	MGI_Mammalian_Phenotype_Level_4_2021	hyperactivity MP:0001399	82/706	0.00710661	0.16198	1.3653	6.75378	CYFIP2;SNAP25;CLIC5;STEAP3;LPGAT1;LRRC4;AP2A1;PTPRK;CHD3;DUSP15;RYR3;PTPRG;LGALS4;FYCO1;UCHL1;EMILIN3;PIEZO2;EPHB2;CADPS2;ZHX3;CACNA2D3;LMTK3;NPY1R;EN1;NRG1;MYO7A;GTPBP2;SEZ6L;SORCS2;SHISA7;AJAP1;ALDH1A3;FNDC4;NPC1;LMX1A;VGF;KIFC1;PLA2G10;LCP2;ASPA;ABCG1;CES1;GRIA1;NLGN3;CAMK2B;GRIA2;NDRG4;MAOB;PDE1B;CTTNBP2;CAMK2A;GPR83;ADCY1;MLLT3;GDPD5;CACNA1F;CXXC4;NCALD;GPR153;GPNMB;PTCHD1;ERBB4;NT5DC2;CASKI…
CvsSt	MGI_Mammalian_Phenotype_Level_4_2021	abnormal neutrophil physiology MP:0002463	16/93	0.00751575	0.167914	2.1425	10.4785	CCR1;NOS3;C5AR1;CYBB;TNF;MMP9;ARHGAP25;PLAC8;GJA1;ALOX5;PLA2G10;FAM3D;LCP1;PADI4;S100A9;CD177
CvsSt	MGI_Mammalian_Phenotype_Level_4_2021	abnormal blood flow velocity MP:0000233	5/15	0.00772708	0.167914	5.14229	25.0071	ACTA2;NOS3;ERBB4;APOE;DCBLD2
CvsSt	MGI_Mammalian_Phenotype_Level_4_2021	abnormal susceptibility to infection MP:0001793	5/15	0.00772708	0.167914	5.14229	25.0071	IL15;LYST;TNF;TLR4;IFNAR1
CvsSt	MGI_Mammalian_Phenotype_Level_4_2021	increased susceptibility to Picornaviridae infection MP:0020937	5/15	0.00772708	0.167914	5.14229	25.0071	CD4;DHX58;FAS;MMP9;IFNAR1
CvsSt	MGI_Mammalian_Phenotype_Level_4_2021	abnormal motor neuron innervation pattern MP:0000940	7/27	0.00780656	0.167914	3.6017	17.4783	SLC5A7;ALCAM;EFNB3;ERBB4;GAN;GFRA1;NRG1
CvsSt	MGI_Mammalian_Phenotype_Level_4_2021	focal hair loss MP:0000418	7/27	0.00780656	0.167914	3.6017	17.4783	KRT71;COL1A1;EDAR;HEPHL1;PTCH1;HOXC13;COL19A1
CvsSt	MGI_Mammalian_Phenotype_Level_4_2021	increased exploration in new environment MP:0001415	26/178	0.00797674	0.167914	1.76644	8.53405	GRIA1;NDRG4;PXK;CHRNA4;PDE1B;SATB2;PRR9;GPR153;PTCHD1;CREG2;PDE4B;CKB;EPHB2;ERC2;CAMK1D;PTGIS;NOS3;ST8SIA2;GTPBP2;SHISA7;SLC6A7;GOLPH3;MAF;ACTC1;PAH;COL6A3
CvsSt	MGI_Mammalian_Phenotype_Level_4_2021	decreased freezing behavior MP:0020422	11/55	0.00813012	0.167914	2.57507	12.3917	COLEC12;CAMK1D;MAF;MOGAT2;LGI3;SHROOM2;PDE7B;KRT75;CLN8;JAK3;ROBO1
CvsSt	MGI_Mammalian_Phenotype_Level_4_2021	gastrointestinal hemorrhage MP:0000465	6/21	0.00820807	0.167914	4.11503	19.763	CLIC5;KITLG;APC;ITGB3;IL18;ZNF385A
CvsSt	MGI_Mammalian_Phenotype_Level_4_2021	increased susceptibility to type IV hypersensitivity reaction MP:0005617	6/21	0.00820807	0.167914	4.11503	19.763	CCR1;IL10;LGALS2;TSC22D3;MMP9;FBN1
CvsSt	MGI_Mammalian_Phenotype_Level_4_2021	increased oxygen consumption MP:0005289	15/86	0.00834403	0.167914	2.17782	10.4235	KCNJ11;CLSTN3;MOGAT2;WHRN;FOXO6;AGPAT2;TRHR;LIPE;C1QTNF2;FABP3;VGF;SLC13A5;TLR4;ABCG1;CES1
CvsSt	MGI_Mammalian_Phenotype_Level_4_2021	abnormal chondrocyte differentiation MP:0014105	4/10	0.0084045	0.167914	6.85403	32.7553	SCUBE2;SHH;COL10A1;FOSL2
CvsSt	MGI_Mammalian_Phenotype_Level_4_2021	abnormal primordial germ cell migration MP:0002982	4/10	0.0084045	0.167914	6.85403	32.7553	KITLG;KIT;WNT5A;PRDM1
CvsSt	MGI_Mammalian_Phenotype_Level_4_2021	abnormal testis physiology MP:0004884	4/10	0.0084045	0.167914	6.85403	32.7553	FADS2;SLC14A1;PITHD1;TNF
CvsSt	MGI_Mammalian_Phenotype_Level_4_2021	absent maxillary shelf MP:0000430	4/10	0.0084045	0.167914	6.85403	32.7553	DLX2;KCNJ13;MSX1;CDON
CvsSt	MGI_Mammalian_Phenotype_Level_4_2021	acanthocytosis MP:0010177	4/10	0.0084045	0.167914	6.85403	32.7553	PPP1R15A;ASL;ANK1;SPTB
CvsSt	MGI_Mammalian_Phenotype_Level_4_2021	decreased keratinocyte proliferation MP:0009584	4/10	0.0084045	0.167914	6.85403	32.7553	SHH;ITGB3;TNF;PPARD
CvsSt	MGI_Mammalian_Phenotype_Level_4_2021	decreased macrophage apoptosis MP:0011081	4/10	0.0084045	0.167914	6.85403	32.7553	PRKCE;FAS;LY96;TLR4
CvsSt	MGI_Mammalian_Phenotype_Level_4_2021	decreased thyroxine level MP:0005471	4/10	0.0084045	0.167914	6.85403	32.7553	SMPD3;GGT1;RUNX2;TRHR
CvsSt	MGI_Mammalian_Phenotype_Level_4_2021	intestinal hypoperistalsis MP:0003290	4/10	0.0084045	0.167914	6.85403	32.7553	DLX2;GFRA1;NRTN;GFRA2
CvsSt	MGI_Mammalian_Phenotype_Level_4_2021	reduced AMPA-mediated synaptic currents MP:0011003	4/10	0.0084045	0.167914	6.85403	32.7553	GRIA1;NLGN3;DLG4;SHISA7
CvsSt	MGI_Mammalian_Phenotype_Level_4_2021	reduced enamel thickness MP:0002577	4/10	0.0084045	0.167914	6.85403	32.7553	GJA1;SP6;AGPAT2;MMP20
CvsSt	MGI_Mammalian_Phenotype_Level_4_2021	wavy vibrissae MP:0001279	4/10	0.0084045	0.167914	6.85403	32.7553	HEPHL1;LIPH;DSG4;FOXN1
CvsSt	MGI_Mammalian_Phenotype_Level_4_2021	abnormal locomotor coordination MP:0003312	8/34	0.00850031	0.167914	3.16707	15.0995	UCHL1;PLCB4;KIF14;PLP1;EN1;NRG1;HSPG2;HCN2
CvsSt	MGI_Mammalian_Phenotype_Level_4_2021	impaired skeletal muscle contractility MP:0002841	8/34	0.00850031	0.167914	3.16707	15.0995	KCNJ11;COL6A1;COL6A3;SCN4A;CACNA1S;CASQ1;JPH1;ANK1
CvsSt	MGI_Mammalian_Phenotype_Level_4_2021	increased NK cell number MP:0008044	8/34	0.00850031	0.167914	3.16707	15.0995	PTPRC;UHRF1;TNFSF12;IL18;TSPO;FAS;TNFRSF10A;LCP2
CvsSt	MGI_Mammalian_Phenotype_Level_4_2021	increased circulating corticosterone level MP:0001745	9/41	0.00866757	0.170113	2.89559	13.7487	HSD11B1;VGF;WHRN;DLG4;PLA2G10;NPY1R;CRH;DBH;APOE
CvsSt	MGI_Mammalian_Phenotype_Level_4_2021	increased bleeding time MP:0005606	12/63	0.00869995	0.170113	2.42404	11.5007	FADS2;AGBL4;SCUBE1;VWF;ITGB3;GALNT1;KIT;TYRP1;RANBP10;SLC7A11;LYST;PAPSS2
CvsSt	MGI_Mammalian_Phenotype_Level_4_2021	cardiac hypertrophy MP:0001625	18/111	0.00886704	0.172504	1.99615	9.43262	TRIM63;NOS3;ITGB3;FHL2;CYBB;SLC4A1;CACNA1C;ANK1;SPTB;THBS4;NFATC4;GJA1;FABP3;NOX4;APOE;ABCD1;FBN1;HBEGF
CvsSt	MGI_Mammalian_Phenotype_Level_4_2021	decreased B cell proliferation MP:0005093	13/71	0.0090533	0.175243	2.30952	10.8654	PRKCB;DAPP1;LY96;TNFRSF13C;PARP14;SMAD7;PNP;PTPRC;IRF4;POU2AF1;PLCG2;TLR4;ARHGEF6
CvsSt	MGI_Mammalian_Phenotype_Level_4_2021	abnormal nervous system morphology MP:0003632	14/79	0.00923337	0.176417	2.21973	10.3993	DAGLA;UHRF1;PTCH1;GFRA1;CLN8;HSPG2;SHH;EDNRB;DLG2;GJB1;CCDC85C;GAN;OTX1;TLR4
CvsSt	MGI_Mammalian_Phenotype_Level_4_2021	glomerulonephritis MP:0002743	14/79	0.00923337	0.176417	2.21973	10.3993	CCR1;C1QA;C1GALT1;CYBB;ANK1;SPTB;C3;SOCS1;PTPRC;RASSF5;PLCG2;FAS;FCGR2B;IL12RB2
CvsSt	MGI_Mammalian_Phenotype_Level_4_2021	abnormal eye morphology MP:0002092	39/298	0.00926478	0.176417	1.55737	7.29089	SERPINC1;GRIK4;ZC3HAV1L;CACNA1F;TRAK2;RASGRP3;SHH;IGLON5;GPC1;TP53INP2;CASKIN1;HESX1;CTSH;NRTN;GJA8;MSX1;OTX1;EPHB2;CHST8;TLE4;EGR1;SEMA4A;CAMK1D;MSX2;ATG9B;AMBN;PMM2;SHROOM2;AXIN2;BMP4;SLC5A7;POR;LRCH2;BFSP1;CDK6;NAV3;BAMBI;IRF4;VWA2
CvsSt	MGI_Mammalian_Phenotype_Level_4_2021	increased circulating triglyceride level MP:0001552	27/189	0.00929715	0.176417	1.72117	8.05173	SNAP25;STEAP4;SLC40A1;AGPAT2;LRP6;LIPE;C1QTNF2;PLAGL2;APOE;B2M;TRPM6;NOS3;NR1H4;ARID3A;CPT1C;SLC5A7;FABP3;NFASC;OAS1;VGF;APC;CTH;CRH;PADI4;SMPDL3A;SIDT2;PPARD
CvsSt	MGI_Mammalian_Phenotype_Level_4_2021	decreased vasodilation MP:0005591	7/28	0.00962687	0.17902	3.43	15.9262	EDNRB;NOS3;CTH;ASL;APOE;KCNN4;RAMP1
CvsSt	MGI_Mammalian_Phenotype_Level_4_2021	decreased spleen weight MP:0004953	21/138	0.0102595	0.17902	1.85184	8.48059	GRIA1;NLGN3;SLC14A1;EGR4;PDE1B;IQSEC3;IL18;SLC7A13;ADCY1;CPT1C;SELENBP1;HOXA9;OTOA;RASSF2;IL7;POU2AF1;COL10A1;JAK3;FADS1;SYBU;RAI2
CvsSt	MGI_Mammalian_Phenotype_Level_4_2021	abnormal excitatory postsynaptic currents MP:0002910	15/88	0.0102907	0.17902	2.11792	9.6927	C1QA;DAGLA;CAMK2A;SEZ6;GRIK4;RORA;NRG1;ADCY1;CPLX1;LRFN2;CACNG8;TYROBP;DLG2;NETO1;ADORA1
CvsSt	MGI_Mammalian_Phenotype_Level_4_2021	neonatal lethality, complete penetrance MP:0011087	58/481	0.0103708	0.17902	1.42072	6.49094	CYFIP2;MESP2;SNAP25;FKBP10;DGKD;HHIP;SLC23A1;JPH1;WFDC2;LMNB2;ADAL;GJA1;SHH;CYP26B1;EDNRB;TUBB3;PPME1;SIX2;HEY2;COL27A1;WNT5A;EN1;NRG1;EBF3;GFRA1;PTBP2;RUNX2;F5;ALDH1A3;MAF;MYCN;SLCO2A1;KIT;ROR1;DLX2;CHRNA4;DLX6;FBLN1;CACNA1C;NALCN;LRP6;SCUBE1;WNT11;CHST11;MSX1;OTX1;GDF11;CBX4;FOXF1;ABCA3;KCNJ13;GSX2;TYR;POU2F2;ASS1;COL1A1;PNPLA1;FGFR1
CvsSt	MGI_Mammalian_Phenotype_Level_4_2021	abnormal enteric neuron morphology MP:0001046	5/16	0.0104297	0.17902	4.67455	21.3304	SHH;EDNRB;KIF26A;GFRA1;NRTN
CvsSt	MGI_Mammalian_Phenotype_Level_4_2021	abnormal glutamate-mediated receptor currents MP:0002886	5/16	0.0104297	0.17902	4.67455	21.3304	LGI1;NLGN3;CACNG8;DLG4;LZTS1
CvsSt	MGI_Mammalian_Phenotype_Level_4_2021	abnormal righting response MP:0002862	5/16	0.0104297	0.17902	4.67455	21.3304	NLGN3;EFNB3;LMX1A;NPY1R;FOXP2
CvsSt	MGI_Mammalian_Phenotype_Level_4_2021	abnormal tendon morphology MP:0005503	5/16	0.0104297	0.17902	4.67455	21.3304	COL14A1;PTCH1;COL6A3;PCOLCE;FBN1
CvsSt	MGI_Mammalian_Phenotype_Level_4_2021	decreased sensory neuron number MP:0000966	5/16	0.0104297	0.17902	4.67455	21.3304	HEYL;GAL;ENTPD3;GDF15;NRG1
CvsSt	MGI_Mammalian_Phenotype_Level_4_2021	increased erythrocyte osmotic fragility MP:0031085	5/16	0.0104297	0.17902	4.67455	21.3304	SLC4A1;AMPD3;KCNN4;ANK1;SPTB
CvsSt	MGI_Mammalian_Phenotype_Level_4_2021	abnormal circulating lipid level MP:0003949	6/22	0.0104536	0.17902	3.85763	17.5939	FNDC5;PHYH;BHMT;APOE;FADS1;CES1
CvsSt	MGI_Mammalian_Phenotype_Level_4_2021	abnormal nail morphology MP:0000579	6/22	0.0104536	0.17902	3.85763	17.5939	WNT10A;MSX2;EN1;SEMA3F;KRT75;FOXN1
CvsSt	MGI_Mammalian_Phenotype_Level_4_2021	increased susceptibility to induced thrombosis MP:0031121	6/22	0.0104536	0.17902	3.85763	17.5939	PROCR;NT5E;ADAMTS13;GDF15;GPX3;SERPINC1
CvsSt	MGI_Mammalian_Phenotype_Level_4_2021	abnormal renal tubule morphology MP:0002703	11/57	0.0106528	0.17902	2.46284	11.1861	MANBA;PTGIS;KCNJ10;DAPK1;SLC7A9;TRPV5;ATP6V0A4;DCHS1;TLR4;XDH;PRDX6
CvsSt	MGI_Mammalian_Phenotype_Level_4_2021	decreased litter size MP:0001935	37/283	0.0112003	0.17902	1.55492	6.98442	KHDRBS3;SYCP2;SERPINC1;CLN8;GMCL1;NKD1;NKD2;WNT6;SPRED2;GJA1;PRSS50;SULT1E1;MRC1;CHST15;CD59;S1PR3;BUB1;AMBP;NOS3;TET1;NR2F2;NRG2;OPRM1;FOXN1;MMP9;SMAD7;COL1A1;ATAT1;BMP4;KITLG;ASTL;PAH;KIT;ASB4;IGFALS;CFTR;BCL2L1
CvsSt	MGI_Mammalian_Phenotype_Level_4_2021	abnormal rod electrophysiology MP:0004021	16/97	0.0112057	0.17902	2.03625	9.14548	GUCY2D;MPP4;WHRN;GUCA1B;RORB;CACNA1F;MERTK;TRPM1;ACTA2;PLCB4;NCAM1;PDE6B;GNAT1;ERC2;RGS9;STRA6
CvsSt	MGI_Mammalian_Phenotype_Level_4_2021	increased B cell number MP:0005014	16/97	0.0112057	0.17902	2.03625	9.14548	IL10;CDKN2C;SPHK2;TNF;FOXN1;PTPRC;RASSF5;KIT;LCN2;COL10A1;FAS;APOE;JAK3;ABCG1;FBN1;HLA-DQB1
CvsSt	MGI_Mammalian_Phenotype_Level_4_2021	abnormal platelet physiology MP:0005464	10/50	0.0113586	0.17902	2.57418	11.5266	FADS2;AGBL4;NT5E;ADAMTS13;VWF;SLPI;SULT1E1;ITGB3;CD59;BCL2L1
CvsSt	MGI_Mammalian_Phenotype_Level_4_2021	abnormal filiform papillae morphology MP:0000763	3/6	0.0113863	0.17902	10.2769	45.9928	WNT10A;KRT36;HOXC13
CvsSt	MGI_Mammalian_Phenotype_Level_4_2021	abnormal gland physiology MP:0002164	3/6	0.0113863	0.17902	10.2769	45.9928	GAL;SLC23A1;APOE
CvsSt	MGI_Mammalian_Phenotype_Level_4_2021	abnormal hair follicle melanocyte morphology MP:0004381	3/6	0.0113863	0.17902	10.2769	45.9928	EDNRB;MLANA;LYST
CvsSt	MGI_Mammalian_Phenotype_Level_4_2021	abnormal melanoblast morphology MP:0009783	3/6	0.0113863	0.17902	10.2769	45.9928	KITLG;EDN3;KIT
CvsSt	MGI_Mammalian_Phenotype_Level_4_2021	abnormal mononuclear cell morphology MP:0008247	3/6	0.0113863	0.17902	10.2769	45.9928	ITGA4;MERTK;FADS1
CvsSt	MGI_Mammalian_Phenotype_Level_4_2021	abnormal muscle cell glucose uptake MP:0004130	3/6	0.0113863	0.17902	10.2769	45.9928	SLC27A1;PRKAA2;TLR4
CvsSt	MGI_Mammalian_Phenotype_Level_4_2021	abnormal pulmonary alveolar duct morphology MP:0002271	3/6	0.0113863	0.17902	10.2769	45.9928	HHIP;PRDX6;TLR4
CvsSt	MGI_Mammalian_Phenotype_Level_4_2021	abnormal sphingolipid level MP:0012230	3/6	0.0113863	0.17902	10.2769	45.9928	NPC1;ACER3;ASPA
CvsSt	MGI_Mammalian_Phenotype_Level_4_2021	abnormal thromboxane level MP:0009818	3/6	0.0113863	0.17902	10.2769	45.9928	PTGIS;ALOX5;ALOX5AP
CvsSt	MGI_Mammalian_Phenotype_Level_4_2021	abnormal tumor pathology MP:0010639	3/6	0.0113863	0.17902	10.2769	45.9928	APC;CAV2;LOXL2
CvsSt	MGI_Mammalian_Phenotype_Level_4_2021	abnormal visceral yolk sac mesenchyme morphology MP:0020516	3/6	0.0113863	0.17902	10.2769	45.9928	BMP4;FOXF1;FGFR1
CvsSt	MGI_Mammalian_Phenotype_Level_4_2021	abnormal zona pellucida morphology MP:0003696	3/6	0.0113863	0.17902	10.2769	45.9928	FADS2;C1GALT1;FETUB
CvsSt	MGI_Mammalian_Phenotype_Level_4_2021	absent alveolar lamellar bodies MP:0010814	3/6	0.0113863	0.17902	10.2769	45.9928	HSD11B1;NOS3;ABCA3
CvsSt	MGI_Mammalian_Phenotype_Level_4_2021	absent enamel MP:0003404	3/6	0.0113863	0.17902	10.2769	45.9928	AMBN;SP6;FAM20A
CvsSt	MGI_Mammalian_Phenotype_Level_4_2021	decreased thoracic vertebrae number MP:0004648	3/6	0.0113863	0.17902	10.2769	45.9928	DUSP4;MLLT3;FGFR1
CvsSt	MGI_Mammalian_Phenotype_Level_4_2021	decreased triiodothyronine level MP:0005473	3/6	0.0113863	0.17902	10.2769	45.9928	SMPD3;RUNX2;TRHR
CvsSt	MGI_Mammalian_Phenotype_Level_4_2021	hemochromatosis MP:0005638	3/6	0.0113863	0.17902	10.2769	45.9928	TF;SLC40A1;B2M
CvsSt	MGI_Mammalian_Phenotype_Level_4_2021	increased osteoblast proliferation MP:0030438	3/6	0.0113863	0.17902	10.2769	45.9928	AXIN2;RUNX2;FGFR1
CvsSt	MGI_Mammalian_Phenotype_Level_4_2021	increased susceptibility to Picornaviridae infection induced morbidity/mortality MP:0031040	3/6	0.0113863	0.17902	10.2769	45.9928	DHX58;MMP9;IFNAR1
CvsSt	MGI_Mammalian_Phenotype_Level_4_2021	pulmonary alveolar edema MP:0010894	3/6	0.0113863	0.17902	10.2769	45.9928	DPP4;NOS3;PRDX6
CvsSt	MGI_Mammalian_Phenotype_Level_4_2021	short cochlear outer hair cells MP:0004466	3/6	0.0113863	0.17902	10.2769	45.9928	USH1G;MYO7A;SLC26A5
CvsSt	MGI_Mammalian_Phenotype_Level_4_2021	thymus cortex atrophy MP:0013585	3/6	0.0113863	0.17902	10.2769	45.9928	CDK6;SOCS1;FAS
CvsSt	MGI_Mammalian_Phenotype_Level_4_2021	tubular nephritis MP:0002704	3/6	0.0113863	0.17902	10.2769	45.9928	MAF;MDK;SPTB
CvsSt	MGI_Mammalian_Phenotype_Level_4_2021	vestigial tail MP:0002632	3/6	0.0113863	0.17902	10.2769	45.9928	MESP2;WNT5A;DVL2
CvsSt	MGI_Mammalian_Phenotype_Level_4_2021	absent long term depression MP:0001899	7/29	0.0117384	0.183062	3.27391	14.5522	GRIA1;NLGN3;GRIA2;DAGLA;CALY;CAMK2A;RYR3
CvsSt	MGI_Mammalian_Phenotype_Level_4_2021	enhanced contextual conditioning behavior MP:0009453	7/29	0.0117384	0.183062	3.27391	14.5522	C3;PPP1R2;LRFN2;KCNIP3;FABP7;CASKIN1;CACNA1C
CvsSt	MGI_Mammalian_Phenotype_Level_4_2021	abnormal circulating amino acid level MP:0005311	9/43	0.0118889	0.183681	2.72496	12.0774	SLC7A9;CTH;PAH;ASL;SLC7A11;NAGS;SLC38A3;PTS;ASS1
CvsSt	MGI_Mammalian_Phenotype_Level_4_2021	increased spleen red pulp amount MP:0008476	9/43	0.0118889	0.183681	2.72496	12.0774	AKAP12;FADS2;PROCR;LGALS2;SOCS1;PTPRC;ASL;SPTB;ZFPM1
CvsSt	MGI_Mammalian_Phenotype_Level_4_2021	abnormal splenic cell ratio MP:0008826	8/36	0.0120945	0.183681	2.94053	12.9825	PPP1R15A;NPY1R;FAS;SLC4A1;TSPAN33;JAK3;FOXN1;RUNX2
CvsSt	MGI_Mammalian_Phenotype_Level_4_2021	impaired synaptic plasticity MP:0001900	8/36	0.0120945	0.183681	2.94053	12.9825	GRIA1;NLGN3;GRIA2;CLIP2;DPYSL4;MAP6;ADCY1;KIF17
CvsSt	MGI_Mammalian_Phenotype_Level_4_2021	abnormal hindlimb morphology MP:0000556	11/58	0.0121195	0.183681	2.41031	10.6365	GDF11;CYP26B1;SHH;UCHL1;DLX6;SATB2;TNNI2;FMN1;PCSK5;HSPG2;LRP6
CvsSt	MGI_Mammalian_Phenotype_Level_4_2021	abnormal immune system organ morphology MP:0002722	11/58	0.0121195	0.183681	2.41031	10.6365	CD4;PTPRC;MECOM;TNFSF12;NPY1R;FAS;RORA;SLC4A1;JAK3;FOXN1;HLA-DQB1
CvsSt	MGI_Mammalian_Phenotype_Level_4_2021	abnormal learning/memory/conditioning MP:0002063	11/58	0.0121195	0.183681	2.41031	10.6365	NLGN3;NETO1;MDK;NOS3;DLG4;PAH;PDE4B;NRCAM;RORB;CPLX2;HCN1
CvsSt	MGI_Mammalian_Phenotype_Level_4_2021	impaired coordination MP:0001405	47/379	0.0122119	0.183681	1.46495	6.45362	CAMK2B;NLGN3;GRIA2;SNAP25;VIPR1;DDC;NXPH3;HEXB;SEZ6;RORA;RORB;CACNA1C;CPLX2;TNF;PTPRG;ELAVL3;UCHL1;EFNB3;MARVELD1;CCR9;NRCAM;ABCD1;IL10;CADPS2;DTNA;KCNJ11;GDF15;EN1;CYBB;ATP1B2;SEZ6L;GDAP1;FOXP2;CLIP2;PLCB4;SLC7A8;NPC1;DLG4;ACER3;KLF9;PLP1;FAS;ATG4B;SCN4A;ASPA;HCN2;ASTN1
CvsSt	MGI_Mammalian_Phenotype_Level_4_2021	abnormal myeloid leukocyte morphology MP:0008250	4/11	0.0122892	0.183681	5.87456	25.8424	IL10;RASSF2;IL7;MXD1
CvsSt	MGI_Mammalian_Phenotype_Level_4_2021	abnormal thoracic cavity morphology MP:0004733	4/11	0.0122892	0.183681	5.87456	25.8424	PTCH1;FOXH1;WNT5A;CACNA1S
CvsSt	MGI_Mammalian_Phenotype_Level_4_2021	decreased heart rate MP:0005333	22/149	0.0123026	0.183681	1.78729	7.86042	KCNH2;ACADVL;DDC;NOS3;ITGB3;PDE2A;NPY1R;NRG1;CACNA1C;TNF;PTS;ANO3;GJA1;ABLIM3;P4HA3;HEY2;CREG2;AGTR1;DPF3;SPOCK1;IDO1;HCN1
CvsSt	MGI_Mammalian_Phenotype_Level_4_2021	slow postnatal weight gain MP:0008489	23/158	0.0125348	0.186425	1.75803	7.69886	IL10;CAMK2B;PPP1R13B;FBXW8;KCNJ11;KIF14;SLC4A1;MYO7A;ADRA2B;FOXP2;RUNX2;RGS5;BHMT;SHH;NPC1;KIT;MGP;COL10A1;PLAGL2;TNNI2;SCN4A;GNB5;XDH
CvsSt	MGI_Mammalian_Phenotype_Level_4_2021	abnormal uterus morphology MP:0001120	20/132	0.012596	0.186615	1.84185	8.05693	CHST8;EMX1;NNMT;PRKCE;SATB2;CPT1C;GDAP1;KBTBD11;RASGRP3;COL1A1;CDH5;PLCB4;WNT11;BAMBI;MAN2B2;VWA2;FAM20A;NOTUM;TLR4;SYBU
CvsSt	MGI_Mammalian_Phenotype_Level_4_2021	ataxia MP:0001393	30/221	0.0128155	0.189139	1.62223	7.0682	CAMK2B;SNAP25;VIPR1;GAL3ST1;HEXB;KIF14;MSI1;RORA;CLN8;CPLX1;UCHL1;ATCAY;EFNB3;STK36;EPB41L3;ADAM23;SLC38A3;ZNF423;PHYH;EGR3;CDKN2C;EN1;PLCB4;LMX1A;NPC1;MAP1A;PLP1;PPT2;ASPA;HCN2
CvsSt	MGI_Mammalian_Phenotype_Level_4_2021	small kidney MP:0002989	27/194	0.0129281	0.190073	1.66918	7.25818	CACNA1C;WNT11;IGLON5;SIX2;TP53INP2;PMEPA1;ASIC2;XDH;TLE4;GDF11;PTGIS;NOS3;AMBN;NAV1;DUSP8;BMP4;MAF;MYCN;PTK7;IRF4;TRPV5;MGP;KCTD11;DCHS1;PADI4;CCNO;CHST2
CvsSt	MGI_Mammalian_Phenotype_Level_4_2021	abnormal digestive system morphology MP:0000462	6/23	0.0131022	0.190451	3.63051	15.7382	COL1A1;SHH;APC;KIT;GFRA1;PAPSS2
CvsSt	MGI_Mammalian_Phenotype_Level_4_2021	abnormal iris pigmentation MP:0005102	6/23	0.0131022	0.190451	3.63051	15.7382	DCT;GPNMB;TYRP1;TYR;LYST;SLC24A5
CvsSt	MGI_Mammalian_Phenotype_Level_4_2021	decreased mean systemic arterial blood pressure MP:0004876	6/23	0.0131022	0.190451	3.63051	15.7382	GPSM1;IL10;RGS5;AGTR1;RORA;KCTD11
CvsSt	MGI_Mammalian_Phenotype_Level_4_2021	abnormal long term depression MP:0001898	5/17	0.013714	0.192796	4.28477	18.3789	CAMK2B;EFNB3;CAMK2A;FOXP2;ARHGEF6
CvsSt	MGI_Mammalian_Phenotype_Level_4_2021	abnormal lymph node cell ratio MP:0008828	5/17	0.013714	0.192796	4.28477	18.3789	RASSF5;NPY1R;FAS;TNF;HLA-DQB1
CvsSt	MGI_Mammalian_Phenotype_Level_4_2021	abnormal triglyceride level MP:0000187	5/17	0.013714	0.192796	4.28477	18.3789	APOBEC1;LIPE;SLC27A1;FABP3;APOE
CvsSt	MGI_Mammalian_Phenotype_Level_4_2021	absent lymph nodes MP:0008024	5/17	0.013714	0.192796	4.28477	18.3789	IL7;MMP15;COL10A1;TNF;JAK3
CvsSt	MGI_Mammalian_Phenotype_Level_4_2021	akinesia MP:0002690	5/17	0.013714	0.192796	4.28477	18.3789	LGI1;SNAP25;DDC;MAP6;SCN4A
CvsSt	MGI_Mammalian_Phenotype_Level_4_2021	anisopoikilocytosis MP:0002641	5/17	0.013714	0.192796	4.28477	18.3789	PPP1R15A;STEAP3;CD59;ANK1;SPTB
CvsSt	MGI_Mammalian_Phenotype_Level_4_2021	CNS inflammation MP:0006082	5/17	0.013714	0.192796	4.28477	18.3789	CXCL10;PTPRC;RNF128;HEXB;FAS
CvsSt	MGI_Mammalian_Phenotype_Level_4_2021	craniorachischisis MP:0008784	5/17	0.013714	0.192796	4.28477	18.3789	PTK7;PTCH1;CELSR1;LRP6;FGFR1
CvsSt	MGI_Mammalian_Phenotype_Level_4_2021	thick dermal layer MP:0001245	5/17	0.013714	0.192796	4.28477	18.3789	COL1A1;EGR1;RASSF9;DSG4;FBN1
CvsSt	MGI_Mammalian_Phenotype_Level_4_2021	disproportionate dwarf MP:0002427	9/44	0.0137994	0.19306	2.64696	11.3373	SMPD3;SPRED2;CHST11;COL10A1;PRKG2;GGT1;HSPG2;PAPSS2;RUNX2
CvsSt	MGI_Mammalian_Phenotype_Level_4_2021	abnormal kidney morphology MP:0002135	49/401	0.0138329	0.19306	1.44057	6.16665	GPSM1;FMN1;ROBO1;SPRED2;SHH;IGLON5;SIX2;PMEPA1;NEK2;TGM3;TLE4;COL27A1;PTGIS;WNT5A;CYBB;GFRA1;NAV1;DUSP8;OVOL1;KRT31;C1QL2;MAF;AGTR1;PADI4;FAM20A;CHST2;CCNO;CES1;CACNA1C;GATA2;CLN8;NALCN;WNT11;TP53INP2;ASIC2;GPR155;XDH;GDF15;NOS3;AMBN;LGI3;CCK;PRDX6;CYP24A1;NPHS1;BAMBI;TRPV5;FAS;NOTUM
CvsSt	MGI_Mammalian_Phenotype_Level_4_2021	abnormal brown adipose tissue morphology MP:0002971	7/30	0.014165	0.195481	3.13139	13.3303	LIPE;ACADVL;FABP3;GPR68;AGPAT2;ABCG1;LRP6
CvsSt	MGI_Mammalian_Phenotype_Level_4_2021	abnormal muscle electrophysiology MP:0004145	7/30	0.014165	0.195481	3.13139	13.3303	KCNH2;SCN4A;CACNA1C;CACNA1S;CASQ1;ANK1;HSPG2
CvsSt	MGI_Mammalian_Phenotype_Level_4_2021	abnormal pain threshold MP:0001970	7/30	0.014165	0.195481	3.13139	13.3303	NPC1;BAMBI;DLG4;OPRM1;ASPA;HCN1;PTGES
CvsSt	MGI_Mammalian_Phenotype_Level_4_2021	abnormal intestine physiology MP:0010155	8/37	0.0142602	0.195481	2.83898	12.0665	IL10;LGALS2;SLC6A19;EDNRB;AGR2;TNF;BCL2L14;CFTR
CvsSt	MGI_Mammalian_Phenotype_Level_4_2021	increased erythroid progenitor cell number MP:0003135	8/37	0.0142602	0.195481	2.83898	12.0665	STEAP3;KIT;LCN2;OPRM1;GATA2;ANK1;ZFPM1;JAM3
CvsSt	MGI_Mammalian_Phenotype_Level_4_2021	lung inflammation MP:0001861	20/134	0.0147213	0.201087	1.80934	7.63261	CCR1;FOXF1;RORA;AMPD3;TNF;ALOX15B;MMP9;DPP4;COL1A1;PTPRC;GPRC5A;RNF128;ENPP3;APOE;FCGR2B;TLR4;ABCG1;CFTR;FBN1;JAM3
CvsSt	MGI_Mammalian_Phenotype_Level_4_2021	abnormal motor learning MP:0002804	11/60	0.0155081	0.210953	2.31167	9.63134	C3;DDC;PEX5L;GRM4;CHRNA4;ATG4B;RORA;NRCAM;APOD;FOXP2;HCN1
CvsSt	MGI_Mammalian_Phenotype_Level_4_2021	hypoactivity MP:0001402	70/610	0.0156856	0.210953	1.34371	5.58314	SNAP25;VIPR1;OLFML2B;DAGLA;STEAP4;CLSTN3;HEXB;TMEM51;RORA;TNF;LMOD2;KIAA1549;GGT1;B2M;FADS1;DENND2D;SBSPON;GPT2;NPY1R;VPS37D;KRT77;OPRM1;SEZ6L;FOXP2;PLCB4;SLC7A8;DNAJC7;NPC1;LCP2;SCN4A;ASPA;CAMK2B;GRIA2;DDC;PRKAA2;INSIG1;SEZ6;FOXO6;CACNA1C;CPLX2;AGPAT2;PTS;RASGRP3;SV2C;HRH3;STK36;SLITRK6;TNNI2;APOD;JAM3;CDK18;RNF25;GDF15;NOS3;ALOX15B;SYT7;COL1A1;SLC6A7;UCK2;PTK7;DLG4;CTH;NMU;PLP1;LHX6;ATP13A2;PNP…
CvsSt	MGI_Mammalian_Phenotype_Level_4_2021	insulin resistance MP:0005331	20/135	0.0158848	0.210953	1.7935	7.42939	SNAP25;SLC6A19;GCKR;STEAP4;PRKAA2;NOS3;DBH;CPT1C;AGPAT2;C1QTNF9B;LRP6;LIPE;CORT;FABP4;HRH3;LCN2;CRH;LCMT1;WDTC1;CTHRC1
CvsSt	MGI_Mammalian_Phenotype_Level_4_2021	decreased circulating glucose level MP:0005560	47/385	0.0159019	0.210953	1.43847	5.95714	CLIC5;C1QA;LRP1;CLSTN3;GPR68;UBE2D1;FOXO6;DBH;TNF;NCALD;LRP6;C3;HSD11B1;RIMS2;PPP3CA;GPNMB;STK36;MDK;UCP3;TNNI2;IGF2BP2;APOE;CACNA1S;SLC38A3;SLC13A5;DUSP4;CPT1A;SPHKAP;WHRN;RNF25;NOS3;CACNA2D3;NR1H4;KLK14;SORBS2;MYO7A;NAV2;SPTB;COL1A1;PTPRD;FABP3;ACAP1;FABP5;VGF;LPCAT3;TSPAN18;CES1
CvsSt	MGI_Mammalian_Phenotype_Level_4_2021	decreased trabecular bone thickness MP:0009346	9/45	0.0159276	0.210953	2.57329	10.6526	SCUBE2;IL10;COL1A1;RASSF2;TMEM178A;MGP;TRPV5;RUNX2;CTHRC1
CvsSt	MGI_Mammalian_Phenotype_Level_4_2021	increased susceptibility to weight loss MP:0010180	9/45	0.0159276	0.210953	2.57329	10.6526	DPP4;CLIC5;FADS2;TKTL1;GPR15;GPR35;NOS3;CTH;ENPP3
CvsSt	MGI_Mammalian_Phenotype_Level_4_2021	spina bifida MP:0003054	9/45	0.0159276	0.210953	2.57329	10.6526	MESP2;KITLG;LMX1A;PTK7;GPR161;TMEM132A;MDFI;LRP6;FGFR1
CvsSt	MGI_Mammalian_Phenotype_Level_4_2021	abnormal oligodendrocyte morphology MP:0000953	6/24	0.0161865	0.210953	3.42863	14.1382	KCNJ10;PTPRC;TYROBP;IL1B;PLP1;ASPA
CvsSt	MGI_Mammalian_Phenotype_Level_4_2021	abnormal motor coordination/balance MP:0001516	16/101	0.0161923	0.210953	1.94	7.99905	NLGN3;LYNX1;KCNJ10;SLC20A2;NREP;TNF;COL1A1;CDH4;ATCAY;LMX1A;ATP6V0A4;ATP13A2;ZNF423;ABCD1;TLR4;KCNK3
CvsSt	MGI_Mammalian_Phenotype_Level_4_2021	decreased B cell number MP:0005017	28/207	0.0164842	0.210953	1.61481	6.62935	TNFRSF13C;SLC1A5;RASGRP3;DOCK10;RASSF2;SOCS1;MECOM;ARHGDIB;SCMH1;COL10A1;JAK3;TLE4;ITGA4;PRKCB;GALNT1;NPY1R;ARID3A;POU2F2;RUNX2;MRAS;PTPRC;IL7;POU2AF1;KIT;CHST1;FAS;TLR4;PLCD1
CvsSt	MGI_Mammalian_Phenotype_Level_4_2021	abnormal vertebral column morphology MP:0004703	8/38	0.0166946	0.210953	2.74419	11.2311	COL1A1;GDF11;CHST11;PMM2;CACNA1S;MLLT3;PCSK5;HSPG2
CvsSt	MGI_Mammalian_Phenotype_Level_4_2021	oligodactyly MP:0000565	8/38	0.0166946	0.210953	2.74419	11.2311	COL1A1;CYP26B1;SHH;SP6;FMN1;PRDM1;LRP6;FGFR1
CvsSt	MGI_Mammalian_Phenotype_Level_4_2021	reduced long term depression MP:0001475	8/38	0.0166946	0.210953	2.74419	11.2311	PLCB4;PRKAR1B;VGF;CAMK2A;ST8SIA4;KIF17;SCN4B;FOXP2
CvsSt	MGI_Mammalian_Phenotype_Level_4_2021	decreased vocalization MP:0020351	7/31	0.0169295	0.210953	3.00075	12.2392	NLGN3;LRFN2;CTTNBP2;DLG4;PLP1;CACNA1C;FOXP2
CvsSt	MGI_Mammalian_Phenotype_Level_4_2021	increased compact bone thickness MP:0004148	7/31	0.0169295	0.210953	3.00075	12.2392	PTH;NOS3;ITGB3;PCOLCE;APOE;NOTUM;HSPG2
CvsSt	MGI_Mammalian_Phenotype_Level_4_2021	lymph node hypoplasia MP:0008101	7/31	0.0169295	0.210953	3.00075	12.2392	IL7;GALNT1;IL34;LCP2;TNF;JAK3;FOXN1
CvsSt	MGI_Mammalian_Phenotype_Level_4_2021	abnormal dendritic spine morphology MP:0009936	10/53	0.0169346	0.210953	2.39419	9.76446	CYFIP2;C3;LRFN2;DLG4;FOXO6;ZDHHC8;CPT1C;SRGAP2;LZTS1;ARHGEF6
CvsSt	MGI_Mammalian_Phenotype_Level_4_2021	abnormal vascular wound healing MP:0004883	10/53	0.0169346	0.210953	2.39419	9.76446	EGR1;GJA1;PRKCB;NOS3;TGFB1I1;IL1B;IRF1;ABHD2;MMP9;TLR4
CvsSt	MGI_Mammalian_Phenotype_Level_4_2021	abnormal ameloblast morphology MP:0002650	4/12	0.017157	0.210953	5.13995	20.8957	AMBN;SP6;FAM20A;MMP20
CvsSt	MGI_Mammalian_Phenotype_Level_4_2021	abnormal esophagus morphology MP:0000467	4/12	0.017157	0.210953	5.13995	20.8957	SHH;MMP15;KIT;COL19A1
CvsSt	MGI_Mammalian_Phenotype_Level_4_2021	abnormal exocrine pancreas morphology MP:0005220	4/12	0.017157	0.210953	5.13995	20.8957	GDF11;VIPR1;SERPINF1;PPT2
CvsSt	MGI_Mammalian_Phenotype_Level_4_2021	abnormal intercostal muscle morphology MP:0002280	4/12	0.017157	0.210953	5.13995	20.8957	SNAP25;COL6A1;NRG1;FBN1
CvsSt	MGI_Mammalian_Phenotype_Level_4_2021	abnormal lung volume MP:0001942	4/12	0.017157	0.210953	5.13995	20.8957	ADAMTS18;SCN4A;APOE;RUNX2
CvsSt	MGI_Mammalian_Phenotype_Level_4_2021	abnormal vasoconstriction MP:0000250	4/12	0.017157	0.210953	5.13995	20.8957	KCNK6;NPY1R;RORA;ADRA2B
CvsSt	MGI_Mammalian_Phenotype_Level_4_2021	absent palatine bone horizontal plate MP:0000431	4/12	0.017157	0.210953	5.13995	20.8957	DLX2;EDNRB;KCNJ13;MSX1
CvsSt	MGI_Mammalian_Phenotype_Level_4_2021	decreased aerobic running capacity MP:0003061	4/12	0.017157	0.210953	5.13995	20.8957	KCNJ11;CACNA1C;CACNA1S;PPARD
CvsSt	MGI_Mammalian_Phenotype_Level_4_2021	dilated renal glomerular capsule MP:0003670	4/12	0.017157	0.210953	5.13995	20.8957	PTGIS;NPHS1;NOS3;FAS
CvsSt	MGI_Mammalian_Phenotype_Level_4_2021	patent ductus arteriosus MP:0003139	4/12	0.017157	0.210953	5.13995	20.8957	EDNRA;SLCO2A1;CACNA1C;PCSK5
CvsSt	MGI_Mammalian_Phenotype_Level_4_2021	pulmonary valve stenosis MP:0006128	4/12	0.017157	0.210953	5.13995	20.8957	GALNT1;HEY2;GATA4;HBEGF
CvsSt	MGI_Mammalian_Phenotype_Level_4_2021	variable body spotting MP:0002940	4/12	0.017157	0.210953	5.13995	20.8957	KITLG;EDNRB;EDN3;KIT
CvsSt	MGI_Mammalian_Phenotype_Level_4_2021	vestibular hair cell degeneration MP:0004324	4/12	0.017157	0.210953	5.13995	20.8957	CLIC5;KCNJ10;USH1G;KIT
CvsSt	MGI_Mammalian_Phenotype_Level_4_2021	abnormal long bone epiphyseal plate morphology MP:0003055	11/61	0.0174474	0.210953	2.26531	9.17128	TLE4;NOS3;MGP;MATN1;COL10A1;TNNI2;HSPG2;MMP9;RUNX2;ADAMTS10;PAPSS2
CvsSt	MGI_Mammalian_Phenotype_Level_4_2021	abnormal bone ossification MP:0008271	13/77	0.0174798	0.210953	2.09231	8.46699	MSX2;SATB2;HSPG2;RUNX2;PAPSS2;SMPD3;SCUBE2;EDNRB;TYROBP;CYP24A1;PRKG2;PPARD;CTHRC1
CvsSt	MGI_Mammalian_Phenotype_Level_4_2021	abnormal pregnancy MP:0009661	5/18	0.0176281	0.210953	3.95496	15.9712	TGIF1;APC;NOS3;ASB4;IDO1
CvsSt	MGI_Mammalian_Phenotype_Level_4_2021	abnormal thymus medulla morphology MP:0002375	5/18	0.0176281	0.210953	3.95496	15.9712	LRFN2;ATCAY;RASSF5;FAS;JAK3
CvsSt	MGI_Mammalian_Phenotype_Level_4_2021	hyperlipidemia MP:0001548	5/18	0.0176281	0.210953	3.95496	15.9712	APC;NOS3;APOE;CPT1C;LRP6
CvsSt	MGI_Mammalian_Phenotype_Level_4_2021	impaired leukocyte tethering or rolling MP:0020332	5/18	0.0176281	0.210953	3.95496	15.9712	GALNT1;GCNT1;FAS;ST3GAL6;CHST4
CvsSt	MGI_Mammalian_Phenotype_Level_4_2021	increased acute inflammation MP:0005088	5/18	0.0176281	0.210953	3.95496	15.9712	HPGDS;VWF;ADAMTS18;CYBB;ARHGAP25
CvsSt	MGI_Mammalian_Phenotype_Level_4_2021	increased susceptibility to neuronal excitotoxicity MP:0008235	5/18	0.0176281	0.210953	3.95496	15.9712	IL10;GRIA2;LYNX1;GAL;NOS3
CvsSt	MGI_Mammalian_Phenotype_Level_4_2021	abnormal myelopoiesis MP:0001601	9/46	0.0182868	0.210953	2.5036	10.0183	IL10;PLSCR1;PNP;TYROBP;ALOX15;LCN2;TNF;JAK3;ANK1
CvsSt	MGI_Mammalian_Phenotype_Level_4_2021	abnormal sexual interaction MP:0002566	9/46	0.0182868	0.210953	2.5036	10.0183	CHRM2;GRIA1;KIRREL3;EGR1;HEXB;LMTK3;RORA;RORB;CPLX1
CvsSt	MGI_Mammalian_Phenotype_Level_4_2021	abnormal cochlear nerve compound action potential MP:0004415	3/7	0.01862	0.210953	7.70728	30.7021	OTOA;MYO7A;FGFR1
CvsSt	MGI_Mammalian_Phenotype_Level_4_2021	abnormal erythrocyte cell number MP:0001586	3/7	0.01862	0.210953	7.70728	30.7021	KIT;AGTR1;SLC4A1
CvsSt	MGI_Mammalian_Phenotype_Level_4_2021	abnormal hypersensitivity reaction MP:0002148	3/7	0.01862	0.210953	7.70728	30.7021	IL10;FAS;FCGR2B
CvsSt	MGI_Mammalian_Phenotype_Level_4_2021	abnormal molar root morphology MP:0030494	3/7	0.01862	0.210953	7.70728	30.7021	EDAR;WNT10A;NOTUM
CvsSt	MGI_Mammalian_Phenotype_Level_4_2021	abnormal sclera morphology MP:0002698	3/7	0.01862	0.210953	7.70728	30.7021	SERPINC1;PRSS56;STRA6
CvsSt	MGI_Mammalian_Phenotype_Level_4_2021	abnormal surfactant composition MP:0004781	3/7	0.01862	0.210953	7.70728	30.7021	NPC1;ABCA3;CRH
CvsSt	MGI_Mammalian_Phenotype_Level_4_2021	absent endocochlear potential MP:0004410	3/7	0.01862	0.210953	7.70728	30.7021	KCNJ10;KIT;ATP6V0A4
CvsSt	MGI_Mammalian_Phenotype_Level_4_2021	absent lymph node germinal center MP:0008523	3/7	0.01862	0.210953	7.70728	30.7021	IRF4;POU2AF1;TNF
CvsSt	MGI_Mammalian_Phenotype_Level_4_2021	absent paraxial mesoderm MP:0012184	3/7	0.01862	0.210953	7.70728	30.7021	MESP2;MECOM;LRP6
CvsSt	MGI_Mammalian_Phenotype_Level_4_2021	absent popliteal lymph nodes MP:0009634	3/7	0.01862	0.210953	7.70728	30.7021	IL7;TOX;TNF
CvsSt	MGI_Mammalian_Phenotype_Level_4_2021	atherosclerotic lesions MP:0005338	3/7	0.01862	0.210953	7.70728	30.7021	RORA;APOE;TLR4
CvsSt	MGI_Mammalian_Phenotype_Level_4_2021	calcified aorta MP:0010522	3/7	0.01862	0.210953	7.70728	30.7021	GALNT3;MGP;FBN1
CvsSt	MGI_Mammalian_Phenotype_Level_4_2021	decreased cellular hemoglobin content MP:0008956	3/7	0.01862	0.210953	7.70728	30.7021	SLC25A37;ANK1;SPTB
CvsSt	MGI_Mammalian_Phenotype_Level_4_2021	decreased gamma-aminobutyric acid level MP:0030733	3/7	0.01862	0.210953	7.70728	30.7021	RORA;SLC38A3;ASPA
CvsSt	MGI_Mammalian_Phenotype_Level_4_2021	lipidosis MP:0008570	3/7	0.01862	0.210953	7.70728	30.7021	PHYH;NPC1;ABCG1
CvsSt	MGI_Mammalian_Phenotype_Level_4_2021	nonconvulsive seizures MP:0000948	3/7	0.01862	0.210953	7.70728	30.7021	AP3M2;OTX1;ELAVL3
CvsSt	MGI_Mammalian_Phenotype_Level_4_2021	reduced NMDA-mediated synaptic currents MP:0001902	3/7	0.01862	0.210953	7.70728	30.7021	DAPK1;FABP7;KIF17
CvsSt	MGI_Mammalian_Phenotype_Level_4_2021	decreased brain weight MP:0002175	13/78	0.019325	0.217224	2.06001	8.12953	EMX1;KIF14;CPT1C;NCALD;ASS1;ASPM;SHH;NPC1;GPC1;CKB;OTX1;PPT2;CCDC92
CvsSt	MGI_Mammalian_Phenotype_Level_4_2021	increased urine protein level MP:0002962	13/78	0.019325	0.217224	2.06001	8.12953	CCR1;CLIC5;C1GALT1;CYBB;PTPRC;NPHS1;RASSF5;KIT;CRH;FAS;FCGR2B;HLA-DQB1;IDO1
CvsSt	MGI_Mammalian_Phenotype_Level_4_2021	abnormal frontal bone morphology MP:0000107	8/39	0.0194145	0.217224	2.65552	10.4674	SHH;MSX2;DLX6;SATB2;PTCH1;FBLN1;MSX1;LRP6
CvsSt	MGI_Mammalian_Phenotype_Level_4_2021	abnormal vision MP:0002090	8/39	0.0194145	0.217224	2.65552	10.4674	TRPM1;EGR1;TENM2;PLCB4;NCAM1;CACNA1F;ERC2;TYR
CvsSt	MGI_Mammalian_Phenotype_Level_4_2021	abnormal inflammatory response MP:0001845	12/70	0.0195751	0.217224	2.13066	8.38094	IL10;C3;SOCS1;ALOX5;GCNT1;NPY1R;CRH;PLCG2;TNF;TLR4;IFNAR1;PTGES
CvsSt	MGI_Mammalian_Phenotype_Level_4_2021	abnormal cranial nerve morphology MP:0001056	6/25	0.0197374	0.217224	3.24799	12.7492	ERBB4;TUBB3;EN1;FBLN1;NRG1;CLN8
CvsSt	MGI_Mammalian_Phenotype_Level_4_2021	abnormal retinal rod cell outer segment morphology MP:0008456	6/25	0.0197374	0.217224	3.24799	12.7492	SEMA4A;RDH12;MSI1;GNAT1;CLN8;STRA6
CvsSt	MGI_Mammalian_Phenotype_Level_4_2021	abnormal tectorial membrane morphology MP:0003149	6/25	0.0197374	0.217224	3.24799	12.7492	TECTB;OTOA;KCNJ10;COL11A2;KIT;APOE
CvsSt	MGI_Mammalian_Phenotype_Level_4_2021	increased angiogenesis MP:0005601	6/25	0.0197374	0.217224	3.24799	12.7492	ITGB3;SERPINF1;RORA;VASH1;HPSE;MMP9
CvsSt	MGI_Mammalian_Phenotype_Level_4_2021	increased myocardial infarction size MP:0003037	6/25	0.0197374	0.217224	3.24799	12.7492	IL10;NT5E;GDF15;PRKCE;KIT;APOD
CvsSt	MGI_Mammalian_Phenotype_Level_4_2021	decreased susceptibility to parasitic infection MP:0005026	7/32	0.0200538	0.219453	2.88057	11.2611	MRC1;FCGR2B;TNF;B2M;ANK1;FOXN1;HLA-DQB1
CvsSt	MGI_Mammalian_Phenotype_Level_4_2021	polydipsia MP:0001426	7/32	0.0200538	0.219453	2.88057	11.2611	SLC2A9;CDK6;TRPV5;CRH;ATP6V0A4;KCTD11;AGPAT2
CvsSt	MGI_Mammalian_Phenotype_Level_4_2021	decreased circulating triglyceride level MP:0002644	34/267	0.0208546	0.227569	1.50706	5.83259	KLB;LRP1;MOGAT2;INSIG1;NXPH4;COL11A2;UBE2D1;AEBP1;PCSK5;TNF;C3;HSD11B1;LIPE;KIAA1549;ANPEP;HNF4A;APOE;IGF2BP2;OLAH;CADPS2;PHYH;ABCA6;AHSG;PDE2A;KLK14;APOA4;FABP4;ACAP1;CRISPLD2;FABP6;LPCAT3;IGFALS;SCN4B;CES1
CvsSt	MGI_Mammalian_Phenotype_Level_4_2021	decreased bone trabecula number MP:0010869	10/55	0.0216349	0.235083	2.28753	8.76912	SMPD3;IL10;SCUBE2;COL1A1;RASSF2;SERPINF1;MGP;RUNX2;CTHRC1;FBN1
CvsSt	MGI_Mammalian_Phenotype_Level_4_2021	intracranial hemorrhage MP:0001915	11/63	0.0218592	0.235083	2.17795	8.32658	COL1A1;POR;CCDC85C;SERPINC1;SLC23A1;C1GALT1;ITGA7;FBLN1;HSPG2;ZNF385A;JAM3
CvsSt	MGI_Mammalian_Phenotype_Level_4_2021	abnormal dopamine level MP:0001905	5/19	0.0222145	0.235083	3.67226	13.9803	SNAP25;DDC;NOS3;SLC23A1;PTS
CvsSt	MGI_Mammalian_Phenotype_Level_4_2021	abnormal olfactory sensory neuron morphology MP:0006092	5/19	0.0222145	0.235083	3.67226	13.9803	GDF11;NPC1;GSX2;NPY1R;CNGA2
CvsSt	MGI_Mammalian_Phenotype_Level_4_2021	blepharoptosis MP:0001344	5/19	0.0222145	0.235083	3.67226	13.9803	DDC;EGR3;NRTN;DBH;GFRA2
CvsSt	MGI_Mammalian_Phenotype_Level_4_2021	decreased paired-pulse facilitation MP:0002920	5/19	0.0222145	0.235083	3.67226	13.9803	SNAP25;LYNX1;UCHL1;GRM4;CAMK2A
CvsSt	MGI_Mammalian_Phenotype_Level_4_2021	decreased tumor incidence MP:0002052	5/19	0.0222145	0.235083	3.67226	13.9803	IL10;CHD1L;IGF2BP2;MMP9;BUB1
CvsSt	MGI_Mammalian_Phenotype_Level_4_2021	increased length of allograft survival MP:0004751	5/19	0.0222145	0.235083	3.67226	13.9803	CCR1;FGL2;TNFRSF13C;FOXN1;CCR4
CvsSt	MGI_Mammalian_Phenotype_Level_4_2021	increased skin tumor incidence MP:0010300	5/19	0.0222145	0.235083	3.67226	13.9803	APC;PTCH1;EAF2;PLCD1;PPARD
CvsSt	MGI_Mammalian_Phenotype_Level_4_2021	intestinal inflammation MP:0001858	5/19	0.0222145	0.235083	3.67226	13.9803	IL10;SOCS1;TRPV5;ENPP3;TNF
CvsSt	MGI_Mammalian_Phenotype_Level_4_2021	microcytic anemia MP:0002810	5/19	0.0222145	0.235083	3.67226	13.9803	IL10;STEAP3;KIT;SLC4A1;ANK1
CvsSt	MGI_Mammalian_Phenotype_Level_4_2021	increased Leydig cell number MP:0001152	8/40	0.0224358	0.236345	2.5724	9.76765	ASPM;KITLG;CDKN2C;CDK6;SULT1E1;EGR4;TSC22D3;KIT
CvsSt	MGI_Mammalian_Phenotype_Level_4_2021	abnormal action potential MP:0005402	14/88	0.0227077	0.236345	1.9488	7.3763	HCN3;PHYH;KCNK9;KCNJ11;HSPG2;GDAP1;CACNA1I;KIT;TSPAN7;KCTD12;SCN4B;HCN2;KCNK3;HCN1
CvsSt	MGI_Mammalian_Phenotype_Level_4_2021	abnormal lipid level MP:0001547	14/88	0.0227077	0.236345	1.9488	7.3763	IL10;SLC27A1;DAGLA;ASAH2;CPT1C;SMPD3;LIPE;BHMT;NPC1;APOE;TLR4;FADS1;ABCG1;PPARD
CvsSt	MGI_Mammalian_Phenotype_Level_4_2021	abnormal glossopharyngeal nerve morphology MP:0001073	4/13	0.0230722	0.236345	4.5686	17.2196	LMX1A;ERBB4;FBLN1;NRG1
CvsSt	MGI_Mammalian_Phenotype_Level_4_2021	abnormal platelet morphology MP:0004720	4/13	0.0230722	0.236345	4.5686	17.2196	AGBL4;MECOM;ZFPM1;ZNF385A
CvsSt	MGI_Mammalian_Phenotype_Level_4_2021	abnormal premaxilla morphology MP:0002820	4/13	0.0230722	0.236345	4.5686	17.2196	DLX6;SATB2;FBLN1;CDON
CvsSt	MGI_Mammalian_Phenotype_Level_4_2021	absent incisors MP:0000125	4/13	0.0230722	0.236345	4.5686	17.2196	EDAR;SATB2;LEF1;MSX1
CvsSt	MGI_Mammalian_Phenotype_Level_4_2021	absent trabeculae carneae MP:0000296	4/13	0.0230722	0.236345	4.5686	17.2196	POR;ERBB4;NRG1;NR2F2
CvsSt	MGI_Mammalian_Phenotype_Level_4_2021	decreased spleen iron level MP:0008808	4/13	0.0230722	0.236345	4.5686	17.2196	IL10;SLC40A1;ANK1;LTF
CvsSt	MGI_Mammalian_Phenotype_Level_4_2021	focal hepatic necrosis MP:0001656	4/13	0.0230722	0.236345	4.5686	17.2196	C3;NR1H4;FAS;TLR4
CvsSt	MGI_Mammalian_Phenotype_Level_4_2021	increased circulating ammonia level MP:0005309	4/13	0.0230722	0.236345	4.5686	17.2196	CA5A;ASL;NAGS;ASS1
CvsSt	MGI_Mammalian_Phenotype_Level_4_2021	spherocytosis MP:0002812	4/13	0.0230722	0.236345	4.5686	17.2196	TF;SLC4A1;ANK1;SPTB
CvsSt	MGI_Mammalian_Phenotype_Level_4_2021	abnormal cochlear hair cell morphology MP:0002622	7/33	0.0235585	0.236345	2.76962	10.3813	GPSM2;EDNRB;INSC;SLITRK6;ROR1;MYO7A;FGFR1
CvsSt	MGI_Mammalian_Phenotype_Level_4_2021	abnormal dermal layer morphology MP:0001243	7/33	0.0235585	0.236345	2.76962	10.3813	COL1A1;SHH;PTCH2;ASL;LYST;RUNX2;FBN1
CvsSt	MGI_Mammalian_Phenotype_Level_4_2021	abnormal skin pigmentation MP:0002095	7/33	0.0235585	0.236345	2.76962	10.3813	KITLG;KIT;TYR;DSG4;LYST;ANK1;FOXN1
CvsSt	MGI_Mammalian_Phenotype_Level_4_2021	increased heart weight MP:0002833	27/204	0.023575	0.236345	1.574	5.89869	STEAP3;ITGB3;NEXN;CACNA1C;TNF;THBS4;DUSP14;LMOD2;HEY2;APOE;KCNN4;PHYH;PTGIS;TRIM63;WHRN;NOS3;ANK1;DCBLD2;FABP3;AGTR1;LCN2;LNX1;ZFPM1;PTPN5;ARHGEF6;HBEGF;HCN1
CvsSt	MGI_Mammalian_Phenotype_Level_4_2021	increased fluid intake MP:0011941	9/48	0.023749	0.236345	2.37495	8.88283	SLC14A1;WNT10A;GDF15;NR1H4;AGTR1;APOE;MYO7A;AGPAT2;GFRA2
CvsSt	MGI_Mammalian_Phenotype_Level_4_2021	abnormal leukocyte cell number MP:0000217	6/26	0.0237827	0.236345	3.08542	11.5358	EGR1;PNP;PTPRC;CCR9;ANK1;FOXN1
CvsSt	MGI_Mammalian_Phenotype_Level_4_2021	abnormal palate morphology MP:0003755	6/26	0.0237827	0.236345	3.08542	11.5358	GDF11;EDNRA;DLX6;SATB2;MSX1;PCSK5
CvsSt	MGI_Mammalian_Phenotype_Level_4_2021	increased cholesterol level MP:0003982	6/26	0.0237827	0.236345	3.08542	11.5358	APOBEC1;NPC1;AQP12A;ABCG1;PNPLA1;LRP6
CvsSt	MGI_Mammalian_Phenotype_Level_4_2021	increased plasma cell number MP:0008097	6/26	0.0237827	0.236345	3.08542	11.5358	IL10;PTPRC;CTTNBP2;RASSF5;FAS;FBN1
CvsSt	MGI_Mammalian_Phenotype_Level_4_2021	shortened head MP:0000435	6/26	0.0237827	0.236345	3.08542	11.5358	EDNRA;MAF;PTCH1;CACNA1S;MSX1;AXIN2
CvsSt	MGI_Mammalian_Phenotype_Level_4_2021	wrinkled skin MP:0001211	6/26	0.0237827	0.236345	3.08542	11.5358	SP6;EN1;DSG4;FOXN1;ASS1;PNPLA1
CvsSt	MGI_Mammalian_Phenotype_Level_4_2021	increased erythrocyte cell number MP:0003131	15/97	0.0238063	0.236345	1.88453	7.04401	STEAP3;ABCA6;PMM2;SLC40A1;AGAP1;ANK1;DCBLD2;HPGDS;ACTC1;PLA2G10;KIT;LCN2;EPHB2;ZFPM1;DGKI
CvsSt	MGI_Mammalian_Phenotype_Level_4_2021	decreased body temperature MP:0005534	10/56	0.0243108	0.240489	2.23768	8.31708	PLAC8;CLIC5;CHRNA4;NOS3;SERPINF1;CASKIN1;NR1H4;TLR4;AGPAT2;ALOX15B
CvsSt	MGI_Mammalian_Phenotype_Level_4_2021	abnormal cytokine level MP:0008713	11/64	0.0243486	0.240489	2.13674	7.93857	IL10;TGIF1;SOCS1;IRF1;IL18;FAM3D;S1PR3;TNF;TLR4;IDO1;IFNAR1
CvsSt	MGI_Mammalian_Phenotype_Level_4_2021	decreased body length MP:0001258	49/415	0.0244552	0.240925	1.38438	5.13731	MESP2;KLB;CLIC5;CD84;DAGLA;SMPD3;SPRED2;PEBP4;PRKG2;MREG;WNT5A;TET1;DNTT;HSPG2;AJAP1;CLIP2;MYCN;PAPPA;COL6A3;ALDOB;ASPA;CFTR;NIM1K;SLC20A2;INSIG1;ADAMTS10;PAPSS2;NCALD;SCUBE2;WNT11;STK36;TP53INP2;IGF2BP2;APOE;SLC13A5;RAB6B;STRA6;EGR1;TPK1;PMM2;IQSEC3;KLK14;ASS1;NFATC4;COL1A1;MFAP4;CDK6;KBTBD8;HCN2
CvsSt	MGI_Mammalian_Phenotype_Level_4_2021	decreased width of hypertrophic chondrocyte zone MP:0003409	8/41	0.0257735	0.253264	2.49431	9.1252	SMPD3;SNAP25;SPRED2;ADAMTS17;MGP;TNNI2;PAPSS2;FOSL2
CvsSt	MGI_Mammalian_Phenotype_Level_4_2021	decreased T cell proliferation MP:0005095	19/133	0.0260116	0.253605	1.71789	6.26895	IL10;PRKCE;TNFRSF13C;LRFN2;PPP3CA;CD4;TYROBP;CDK6;PTPRC;IRF4;TNFSF4;CRH;ACKR4;CD48;LCP2;FYN;JAK3;BCL2L1;ARHGEF6
CvsSt	MGI_Mammalian_Phenotype_Level_4_2021	dermatitis MP:0001194	10/57	0.0272168	0.253605	2.18995	7.8924	FADS2;KITLG;ITGB3;ELOVL3;ALOX15;PLCG2;TRPV3;ACKR2;CACNA1C;DSG4
CvsSt	MGI_Mammalian_Phenotype_Level_4_2021	abnormal axonal transport MP:0004768	5/20	0.027509	0.253605	3.42725	12.315	GAN;DPYSL3;PLP1;GDAP1;KIF17
CvsSt	MGI_Mammalian_Phenotype_Level_4_2021	abnormal hippocampus development MP:0000808	5/20	0.027509	0.253605	3.42725	12.315	LMX1A;MDK;CHN2;LEF1;SEMA3F
CvsSt	MGI_Mammalian_Phenotype_Level_4_2021	abnormal orientation of outer hair cell stereociliary bundles MP:0004491	5/20	0.027509	0.253605	3.42725	12.315	GPSM2;PTK7;MYO7A;CELSR1;LRP6
CvsSt	MGI_Mammalian_Phenotype_Level_4_2021	abnormal tumor morphology MP:0003448	5/20	0.027509	0.253605	3.42725	12.315	PLK3;APC;CAV2;MMP9;IL12RB2
CvsSt	MGI_Mammalian_Phenotype_Level_4_2021	decreased spleen germinal center number MP:0008482	5/20	0.027509	0.253605	3.42725	12.315	C3;GALNT1;FAS;ASL;TNF
CvsSt	MGI_Mammalian_Phenotype_Level_4_2021	delayed sexual maturation MP:0001938	5/20	0.027509	0.253605	3.42725	12.315	COL1A1;SMPD3;VGF;NUPR1;CFTR
CvsSt	MGI_Mammalian_Phenotype_Level_4_2021	impaired olfaction MP:0008544	5/20	0.027509	0.253605	3.42725	12.315	NLGN3;SLC24A4;NPC1;ATP6V0A4;APOE
CvsSt	MGI_Mammalian_Phenotype_Level_4_2021	increased interleukin-13 secretion MP:0008672	5/20	0.027509	0.253605	3.42725	12.315	DUSP4;RGS16;POU2AF1;MMP9;FBN1
CvsSt	MGI_Mammalian_Phenotype_Level_4_2021	abnormal axon pruning MP:0008960	3/8	0.0278491	0.253605	6.16548	22.0783	EFNB3;CHN2;EPHB2
CvsSt	MGI_Mammalian_Phenotype_Level_4_2021	abnormal cerebellum deep nucleus morphology MP:0009979	3/8	0.0278491	0.253605	6.16548	22.0783	MANBA;ATG4B;RORA
CvsSt	MGI_Mammalian_Phenotype_Level_4_2021	abnormal dentin development MP:0030542	3/8	0.0278491	0.253605	6.16548	22.0783	SMPD3;NOTUM;AGPAT2
CvsSt	MGI_Mammalian_Phenotype_Level_4_2021	abnormal foot pad morphology MP:0000574	3/8	0.0278491	0.253605	6.16548	22.0783	PTCH1;PLCG2;EN1
CvsSt	MGI_Mammalian_Phenotype_Level_4_2021	abnormal lateral plate mesoderm morphology MP:0010117	3/8	0.0278491	0.253605	6.16548	22.0783	BMP4;FOXF1;FGFR1
CvsSt	MGI_Mammalian_Phenotype_Level_4_2021	abnormal miscarriage rate MP:0004244	3/8	0.0278491	0.253605	6.16548	22.0783	MECOM;ITGB3;TYR
CvsSt	MGI_Mammalian_Phenotype_Level_4_2021	absent fibula MP:0005430	3/8	0.0278491	0.253605	6.16548	22.0783	SHH;FMN1;PCSK5
CvsSt	MGI_Mammalian_Phenotype_Level_4_2021	absent lower incisors MP:0004791	3/8	0.0278491	0.253605	6.16548	22.0783	SATB2;LEF1;MSX1
CvsSt	MGI_Mammalian_Phenotype_Level_4_2021	absent skin pigmentation MP:0001189	3/8	0.0278491	0.253605	6.16548	22.0783	KITLG;KIT;TYR
CvsSt	MGI_Mammalian_Phenotype_Level_4_2021	absent third pharyngeal arch MP:0010642	3/8	0.0278491	0.253605	6.16548	22.0783	PTCH1;KDR;PRDM1
CvsSt	MGI_Mammalian_Phenotype_Level_4_2021	absent upper incisors MP:0004790	3/8	0.0278491	0.253605	6.16548	22.0783	LEF1;MSX1;CDON
CvsSt	MGI_Mammalian_Phenotype_Level_4_2021	adenohypophysis hypoplasia MP:0008365	3/8	0.0278491	0.253605	6.16548	22.0783	EGR1;CDK6;NPC1
CvsSt	MGI_Mammalian_Phenotype_Level_4_2021	crystalluria MP:0009645	3/8	0.0278491	0.253605	6.16548	22.0783	SLC7A9;AGXT;XDH
CvsSt	MGI_Mammalian_Phenotype_Level_4_2021	decreased compact bone mass MP:0010962	3/8	0.0278491	0.253605	6.16548	22.0783	IL10;CLSTN3;MGP
CvsSt	MGI_Mammalian_Phenotype_Level_4_2021	decreased inferior colliculus size MP:0009038	3/8	0.0278491	0.253605	6.16548	22.0783	EN1;OTX1;FGFR1
CvsSt	MGI_Mammalian_Phenotype_Level_4_2021	decreased lung compliance MP:0010896	3/8	0.0278491	0.253605	6.16548	22.0783	ADAL;EDNRA;AQP5
CvsSt	MGI_Mammalian_Phenotype_Level_4_2021	growth retardation of molars MP:0000128	3/8	0.0278491	0.253605	6.16548	22.0783	MSX1;RUNX2;LRP6
CvsSt	MGI_Mammalian_Phenotype_Level_4_2021	head spot MP:0002939	3/8	0.0278491	0.253605	6.16548	22.0783	KITLG;EDNRB;KIT
CvsSt	MGI_Mammalian_Phenotype_Level_4_2021	increased retinal ganglion cell number MP:0002983	3/8	0.0278491	0.253605	6.16548	22.0783	GDF11;NCAM1;RORB
CvsSt	MGI_Mammalian_Phenotype_Level_4_2021	priapism MP:0003415	3/8	0.0278491	0.253605	6.16548	22.0783	ADAL;SERPINC1;GGT1
CvsSt	MGI_Mammalian_Phenotype_Level_4_2021	urolithiasis MP:0005360	3/8	0.0278491	0.253605	6.16548	22.0783	SLC7A9;AGXT;SPTB
CvsSt	MGI_Mammalian_Phenotype_Level_4_2021	increased insulin sensitivity MP:0002891	20/143	0.0279744	0.254145	1.67611	5.99455	IL10;CADPS2;VIPR1;KCNJ11;CLSTN3;GPR68;AHSG;FOXO6;SORBS1;HSPA12A;LRP6;COL1A1;FABP3;FABP5;UCP3;ST3GAL5;IGF2BP2;SLC13A5;CES1;STRA6
CvsSt	MGI_Mammalian_Phenotype_Level_4_2021	abnormal hippocampus pyramidal cell layer MP:0008284	6/27	0.0283473	0.255723	2.93834	10.47	DPYSL4;LMX1A;CLSTN3;FYN;NCAM1;LYST
CvsSt	MGI_Mammalian_Phenotype_Level_4_2021	decreased B-2 B cell number MP:0008207	6/27	0.0283473	0.255723	2.93834	10.47	PNP;PTPRC;PLCG2;ARID3A;TNFRSF13C;JAK3
CvsSt	MGI_Mammalian_Phenotype_Level_4_2021	increased dendritic cell number MP:0008126	6/27	0.0283473	0.255723	2.93834	10.47	ADAL;PTPRC;TYROBP;IL18;TNF;ABCG1
CvsSt	MGI_Mammalian_Phenotype_Level_4_2021	limb grasping MP:0001513	31/245	0.028521	0.256689	1.49509	5.31819	CLIC5;NDRG4;DDC;HEXB;RORA;RORB;SEMA3F;CPLX2;CLN8;TRPM1;AKAP12;FOXRED2;UCHL1;EPB41L3;NEFL;NRCAM;MSX1;CACNA1S;STK32C;IL15;GDAP1;IGSF11;TF;FNDC4;VGF;ACER3;ATG4B;SCN4A;ATP13A2;PPT2;ASPA
CvsSt	MGI_Mammalian_Phenotype_Level_4_2021	increased CD8-positive, alpha-beta T cell number MP:0008078	16/108	0.0288326	0.258889	1.7917	6.35381	GPR15;NUP210;PRKCB;NPY1R;TNF;FOXP2;DPP4;LGALS2;CD4;CDK6;PTPRC;CCR4;JAK3;ABCG1;IFNAR1;HLA-DQB1
CvsSt	MGI_Mammalian_Phenotype_Level_4_2021	decreased ventricle muscle contractility MP:0005598	12/74	0.0291716	0.261324	1.99276	7.04352	FHOD3;VAV3;COL1A1;GJA1;GALNT1;HEY2;IL18;SLC4A1;NRG1;TNF;THBS4;HBEGF
CvsSt	MGI_Mammalian_Phenotype_Level_4_2021	abnormal cerebellum external granule cell layer morphology MP:0000872	8/42	0.0294419	0.261542	2.42081	8.53419	LGI1;CADPS2;SHH;PLCB4;RORA;ASS1;FOXP2;ASTN1
CvsSt	MGI_Mammalian_Phenotype_Level_4_2021	abnormal muscle morphology MP:0002108	8/42	0.0294419	0.261542	2.42081	8.53419	COL15A1;EDNRA;COL6A1;PMEPA1;SCN4A;CACNA1S;FOXN1;HSPG2
CvsSt	MGI_Mammalian_Phenotype_Level_4_2021	circling MP:0001394	14/91	0.0294783	0.261542	1.87256	6.5991	CLIC5;WHRN;CAMK2A;MYO7A;CELSR1;ASS1;BMP4;LMX1A;USH1G;ATG4B;MAP6;ATP6V0A4;OTX1;EPHB2
CvsSt	MGI_Mammalian_Phenotype_Level_4_2021	hydrometra MP:0009709	14/91	0.0294783	0.261542	1.87256	6.5991	EMX1;NNMT;ALOX15;SLC2A5;FOXN1;KBTBD11;PLCB4;WNT11;BAMBI;VWA2;FAM20A;B2M;SYBU;CHST2
CvsSt	MGI_Mammalian_Phenotype_Level_4_2021	abnormal dentin morphology MP:0002818	4/14	0.0300801	0.261542	4.11151	14.4063	WNT10A;SP6;NOTUM;RUNX2
CvsSt	MGI_Mammalian_Phenotype_Level_4_2021	abnormal grooming behavior MP:0001440	4/14	0.0300801	0.261542	4.11151	14.4063	GRIA2;GPNMB;NREP;CPLX2
CvsSt	MGI_Mammalian_Phenotype_Level_4_2021	abnormal rectum morphology MP:0000492	4/14	0.0300801	0.261542	4.11151	14.4063	TLE4;GDF11;WNT5A;PCSK5
CvsSt	MGI_Mammalian_Phenotype_Level_4_2021	abnormal sclerotome morphology MP:0006029	4/14	0.0300801	0.261542	4.11151	14.4063	MESP2;UHRF1;MDFI;EPHA2
CvsSt	MGI_Mammalian_Phenotype_Level_4_2021	decreased vascular permeability MP:0003071	4/14	0.0300801	0.261542	4.11151	14.4063	C3;CDH5;NOS3;KIT
CvsSt	MGI_Mammalian_Phenotype_Level_4_2021	increased T-helper 1 cell number MP:0008086	4/14	0.0300801	0.261542	4.11151	14.4063	NUP210;TNFSF12;B2M;DUSP14
CvsSt	MGI_Mammalian_Phenotype_Level_4_2021	kidney cortex atrophy MP:0011423	4/14	0.0300801	0.261542	4.11151	14.4063	SLC2A9;PTGIS;C1GALT1;KCTD11
CvsSt	MGI_Mammalian_Phenotype_Level_4_2021	short metacarpal bones MP:0004634	4/14	0.0300801	0.261542	4.11151	14.4063	SHH;PTH;ADAMTS17;FBN1
CvsSt	MGI_Mammalian_Phenotype_Level_4_2021	vagina atresia MP:0001144	4/14	0.0300801	0.261542	4.11151	14.4063	KITLG;DHX58;MERTK;OVOL1
CvsSt	MGI_Mammalian_Phenotype_Level_4_2021	abnormal maxilla morphology MP:0000455	9/50	0.0302824	0.261542	2.25885	7.89963	COL1A1;EDNRA;SHH;DLX2;DLX6;INSIG1;SATB2;IFT57;CDON
CvsSt	MGI_Mammalian_Phenotype_Level_4_2021	increased anti-double stranded DNA antibody level MP:0004762	9/50	0.0302824	0.261542	2.25885	7.89963	TYROBP;PTPRC;RNF128;RASSF5;CYBB;FAS;APOE;FCGR2B;HLA-DQB1
CvsSt	MGI_Mammalian_Phenotype_Level_4_2021	increased energy expenditure MP:0004889	9/50	0.0302824	0.261542	2.25885	7.89963	GPSM1;C1QTNF2;KCNJ11;CLSTN3;NR1H4;SCN4A;IGF2BP2;SLC13A5;ABCG1
CvsSt	MGI_Mammalian_Phenotype_Level_4_2021	abnormal long bone epiphyseal plate proliferative zone MP:0003662	10/58	0.0303621	0.261643	2.14421	7.49306	TLE4;SCUBE2;COL27A1;MGP;COL10A1;GGT1;HSPG2;RUNX2;ADAMTS10;PAPSS2
CvsSt	MGI_Mammalian_Phenotype_Level_4_2021	alopecia MP:0000414	15/100	0.0304329	0.261669	1.81772	6.34789	KRT71;MSX2;PTCH2;LEF1;RASSF9;HOXC13;TNF;PTS;ASS1;SHH;KIT;APOE;ITGB6;DSG4;PLCD1
CvsSt	MGI_Mammalian_Phenotype_Level_4_2021	abnormal object recognition memory MP:0001458	7/35	0.031783	0.270859	2.57151	8.86868	CAMK2B;SNAP25;GAL;SLC9A5;NPC1;PDE4B;LZTS1
CvsSt	MGI_Mammalian_Phenotype_Level_4_2021	abnormal reproductive system physiology MP:0001919	7/35	0.031783	0.270859	2.57151	8.86868	CHST8;IL10;FADS2;EGR1;CACNG8;ADAMTS18;TRPM6
CvsSt	MGI_Mammalian_Phenotype_Level_4_2021	abnormal retinal pigmentation MP:0005103	7/35	0.031783	0.270859	2.57151	8.86868	GPR143;KITLG;SERPINF1;MERTK;LYST;ARHGAP25;SLC24A5
CvsSt	MGI_Mammalian_Phenotype_Level_4_2021	malocclusion MP:0000120	7/35	0.031783	0.270859	2.57151	8.86868	EDNRA;MAST4;MECOM;MSX2;SPRY4;DMRT3;PAPSS2
CvsSt	MGI_Mammalian_Phenotype_Level_4_2021	polyuria MP:0001762	12/75	0.0320249	0.27179	1.96102	6.74834	SLC2A9;SLC14A1;KCNJ10;CDK6;UPK2;GDF15;TRPV5;CRH;SLC4A1;KCTD11;ATP6V0A4;FBN1
CvsSt	MGI_Mammalian_Phenotype_Level_4_2021	cardiac fibrosis MP:0003141	14/92	0.0320334	0.27179	1.84845	6.36049	VAV3;EGR1;DTNA;FHL2;NEXN;TNF;MMP9;THBS4;DUSP14;GJA1;HEY2;AGTR1;HBEGF;FBN1
CvsSt	MGI_Mammalian_Phenotype_Level_4_2021	decreased IgG level MP:0001805	15/101	0.0329168	0.27725	1.79648	6.13278	LMBR1L;CD84;CHRNA4;IL15;GALNT1;TNFRSF13C;TNF;RASGRP3;CD4;IRF4;POU2AF1;FAS;B2M;JAK3;HLA-DQB1
CvsSt	MGI_Mammalian_Phenotype_Level_4_2021	increased susceptibility to bacterial infection induced morbidity/mortality MP:0009788	11/67	0.0330463	0.27725	2.02193	6.89449	C3;GPR15;NOS3;IL1B;TRPV2;TNF;JAK3;ANK1;CAMP;CFTR;IFNAR1
CvsSt	MGI_Mammalian_Phenotype_Level_4_2021	abnormal parietal bone morphology MP:0000109	6/28	0.0334529	0.27725	2.80462	9.52903	GJA1;LMX1A;DLX6;PTCH1;FBLN1;RUNX2
CvsSt	MGI_Mammalian_Phenotype_Level_4_2021	abnormal lung vasculature morphology MP:0004007	8/43	0.033454	0.27725	2.35152	7.98948	ADAL;SHH;NPC1;FOXF1;NOS3;MGP;GATA4;FBN1
CvsSt	MGI_Mammalian_Phenotype_Level_4_2021	abnormal coat appearance MP:0001510	16/110	0.0335181	0.27725	1.75338	5.95392	KRT71;SLC6A19;FOXE1;ELOVL3;CELSR1;TYR;KRT31;LRP6;EDAR;PLAC8;SBK1;P4HA3;ZNF831;GGT1;DSG4;ST6GALNAC3
CvsSt	MGI_Mammalian_Phenotype_Level_4_2021	abnormal circulating chemokine level MP:0010209	5/21	0.0335406	0.27725	3.21287	10.9077	CCR1;ACKR4;CYBB;TNF;ZFPM1
CvsSt	MGI_Mammalian_Phenotype_Level_4_2021	abnormal enamel morphology MP:0002576	5/21	0.0335406	0.27725	3.21287	10.9077	SLC24A4;PTCH1;FAM20A;RUNX2;MMP20
CvsSt	MGI_Mammalian_Phenotype_Level_4_2021	abnormal hair texture MP:0002074	5/21	0.0335406	0.27725	3.21287	10.9077	EDAR;HEPHL1;KRT25;DSG4;TGM3
CvsSt	MGI_Mammalian_Phenotype_Level_4_2021	abnormal T cell number MP:0006387	5/21	0.0335406	0.27725	3.21287	10.9077	IRF1;NPY1R;APOE;B2M;JAK3
CvsSt	MGI_Mammalian_Phenotype_Level_4_2021	decreased serotonin level MP:0010070	5/21	0.0335406	0.27725	3.21287	10.9077	DDC;RNF180;PAH;EN1;PTS
CvsSt	MGI_Mammalian_Phenotype_Level_4_2021	increased incidence of induced tumors MP:0002021	5/21	0.0335406	0.27725	3.21287	10.9077	ADAM28;APC;LYST;BUB1;IFNAR1
CvsSt	MGI_Mammalian_Phenotype_Level_4_2021	pulmonary vascular congestion MP:0010018	5/21	0.0335406	0.27725	3.21287	10.9077	MECOM;NOS3;ABCA3;HEY2;RUNX2
CvsSt	MGI_Mammalian_Phenotype_Level_4_2021	abnormal digestive system physiology MP:0001663	9/51	0.0339783	0.279668	2.20495	7.45721	SLC4A9;CA2;KIT;APOE;EPHB2;KCNN4;SLC26A3;CFTR;JAM3
CvsSt	MGI_Mammalian_Phenotype_Level_4_2021	decreased platelet aggregation MP:0009549	9/51	0.0339783	0.279668	2.20495	7.45721	FADS2;AGBL4;SCUBE1;VWF;PLCG2;RANBP10;LCP2;PEAR1;MERTK
CvsSt	MGI_Mammalian_Phenotype_Level_4_2021	abnormal brain morphology MP:0002152	27/211	0.0344001	0.282536	1.51354	5.10015	SNAP25;GAL3ST1;CHRNA4;LEF1;RORA;CACNA1C;EDNRB;SCUBE1;GPC1;APOE;MSX1;WNT10B;CADPS2;PTGIS;EN1;NAV1;DUSP8;HSPG2;SPTB;MYCN;IRF4;PLP1;PPT2;NOTUM;ASPA;PPARD;FGFR1
CvsSt	MGI_Mammalian_Phenotype_Level_4_2021	cochlear outer hair cell degeneration MP:0004404	12/76	0.0350725	0.286835	1.93027	6.46706	CLIC5;KCNJ10;USH1G;CLDN14;WHRN;OCM;KCNQ4;MYO7A;APOE;CELSR1;SYNE4;SLC26A5
CvsSt	MGI_Mammalian_Phenotype_Level_4_2021	increased liver triglyceride level MP:0009355	12/76	0.0350725	0.286835	1.93027	6.46706	IL10;FADS2;EGR1;STEAP4;HKDC1;NR1H4;LCN2;BCO2;AGPAT2;C1QTNF9B;SIDT2;LRP6
CvsSt	MGI_Mammalian_Phenotype_Level_4_2021	kinked tail MP:0000585	15/102	0.0355451	0.289771	1.77573	5.92554	GEN1;MESP2;TGIF1;PTCH1;AEBP1;AXIN2;CELSR1;MFSD12;LRP6;EDAR;MYCN;LMX1A;DVL2;MDFI;EPHA2
CvsSt	MGI_Mammalian_Phenotype_Level_4_2021	abnormal synaptic vesicle number MP:0004792	7/36	0.0365354	0.289771	2.4827	8.21643	C3;CTTNBP2;DNAJC6;CAMK2A;MAP6;ERC2;FGF22
CvsSt	MGI_Mammalian_Phenotype_Level_4_2021	belly spot MP:0000373	7/36	0.0365354	0.289771	2.4827	8.21643	KITLG;EDNRB;LMX1A;PTCH1;GPR161;KIT;TYR
CvsSt	MGI_Mammalian_Phenotype_Level_4_2021	increased width of hypertrophic chondrocyte zone MP:0003408	7/36	0.0365354	0.289771	2.4827	8.21643	SMPD3;PTH;COL10A1;HSPG2;MMP9;ADAMTS10;RUNX2
CvsSt	MGI_Mammalian_Phenotype_Level_4_2021	lung hemorrhage MP:0001182	7/36	0.0365354	0.289771	2.4827	8.21643	DPP4;COL1A1;FOXF1;NOS3;HSPG2;PRDX6;FBN1
CvsSt	MGI_Mammalian_Phenotype_Level_4_2021	increased anxiety-related response MP:0001363	28/222	0.0372263	0.289771	1.48871	4.89896	GRIA1;SNAP25;DDC;LPGAT1;CHRNA4;CTTNBP2;RNF180;TNF;CRHBP;SV2C;HRH3;MDK;ADORA1;MAP6;APOE;FGFBP3;LZTS1;CADPS2;KCNJ11;NOS3;KCNIP3;MYO7A;SEZ6L;TRHR;DLG4;FABP7;LRRN1;LCP2
CvsSt	MGI_Mammalian_Phenotype_Level_4_2021	abnormal CD4-positive, alpha-beta T cell physiology MP:0005463	10/60	0.0374048	0.289771	2.05821	6.76319	SEMA4A;CD84;CD4;RNF128;SPHK2;ACKR4;FYN;TNF;HLA-E;HLA-DQB1
CvsSt	MGI_Mammalian_Phenotype_Level_4_2021	abnormal maternal nurturing MP:0001386	10/60	0.0374048	0.289771	2.05821	6.76319	RIMS2;CADPS2;CORT;DDC;AMBP;WHRN;DLG4;RORA;FYN;NAGS
CvsSt	MGI_Mammalian_Phenotype_Level_4_2021	decreased hematopoietic stem cell number MP:0004810	9/52	0.0379736	0.289771	2.15355	7.04398	TLE4;RASSF2;MYCN;CDK6;MECOM;ANGPTL7;ARID3A;GATA2;JAK3
CvsSt	MGI_Mammalian_Phenotype_Level_4_2021	decreased interleukin-4 secretion MP:0008700	9/52	0.0379736	0.289771	2.15355	7.04398	PPP3CA;MAF;RNF128;IL1B;TNFSF4;RFTN1;COL10A1;B2M;CCR4
CvsSt	MGI_Mammalian_Phenotype_Level_4_2021	abnormal bile salt level MP:0004774	4/15	0.0382084	0.289771	3.73753	12.2019	CD4;SLC10A2;NR1H4;TLR4
CvsSt	MGI_Mammalian_Phenotype_Level_4_2021	abnormal glomerular capillary endothelium morphology MP:0011453	4/15	0.0382084	0.289771	3.73753	12.2019	CLIC5;NOS3;FAS;FBLN1
CvsSt	MGI_Mammalian_Phenotype_Level_4_2021	abnormal protein level MP:0008469	4/15	0.0382084	0.289771	3.73753	12.2019	IL10;KCNIP3;IDO1;STRA6
CvsSt	MGI_Mammalian_Phenotype_Level_4_2021	chondrodystrophy MP:0002657	4/15	0.0382084	0.289771	3.73753	12.2019	COL27A1;MSX2;HSPG2;PAPSS2
CvsSt	MGI_Mammalian_Phenotype_Level_4_2021	decreased mast cell number MP:0000336	4/15	0.0382084	0.289771	3.73753	12.2019	CCR1;C3;KITLG;KIT
CvsSt	MGI_Mammalian_Phenotype_Level_4_2021	dilated renal tubules MP:0002705	12/77	0.0383204	0.289771	1.90047	6.19891	SLC2A9;MAF;CYP24A1;NPHS1;SLC7A9;NOS3;TRPV5;KCTD11;DCHS1;FAM20A;TLR4;XDH
CvsSt	MGI_Mammalian_Phenotype_Level_4_2021	increased neutrophil cell number MP:0000219	24/185	0.0384676	0.289771	1.53688	5.00708	LMBR1L;PDE2A;PTCH2;GCNT1;CYBB;TNF;ANK1;ARHGAP25;FOXN1;PIK3R5;DPP4;PLAC8;CDH5;PTPRC;IRF4;POU2AF1;LCN2;FAS;FAM3D;ZFPM1;CCR4;JAK3;ABCG1;CAMP
CvsSt	MGI_Mammalian_Phenotype_Level_4_2021	decreased bone mineral content MP:0010124	43/368	0.0385145	0.289771	1.36652	4.45037	GRIA1;LPGAT1;DAGLA;SLC20A2;TGFB1I1;SLC40A1;AGAP1;C8B;CXXC4;NCALD;ROBO1;GJA1;SHH;DPF3;COL10A1;RTTN;GBP2;IL10;TLE4;WNT10B;DDX59;GPR15;PLK5;IQSEC3;TMEM132A;NR1H4;ADAM32;KRT77;APTX;NFATC4;AJAP1;COL1A1;SLC6A7;TF;KITLG;GOLPH3;PAPPA;ATG4B;ALDOB;GNB5;TOX;ASPA;DGKI
CvsSt	MGI_Mammalian_Phenotype_Level_4_2021	abnormal alveolar process morphology MP:0004189	3/9	0.0390633	0.289771	5.13762	16.6591	SMPD3;EDNRA;WNT10A
CvsSt	MGI_Mammalian_Phenotype_Level_4_2021	abnormal aorta elastic tissue morphology MP:0009862	3/9	0.0390633	0.289771	5.13762	16.6591	ACTA2;COL1A1;FBN1
CvsSt	MGI_Mammalian_Phenotype_Level_4_2021	abnormal gland morphology MP:0002163	3/9	0.0390633	0.289771	5.13762	16.6591	GAL;FAS;CFTR
CvsSt	MGI_Mammalian_Phenotype_Level_4_2021	abnormal immune cell physiology MP:0001819	3/9	0.0390633	0.289771	5.13762	16.6591	NPY1R;LY96;FYN
CvsSt	MGI_Mammalian_Phenotype_Level_4_2021	abnormal lens vesicle development MP:0001292	3/9	0.0390633	0.289771	5.13762	16.6591	MAF;MYCN;MSX2
CvsSt	MGI_Mammalian_Phenotype_Level_4_2021	abnormal mandibular prominence morphology MP:0010939	3/9	0.0390633	0.289771	5.13762	16.6591	DLX6;PTCH1;KDR
CvsSt	MGI_Mammalian_Phenotype_Level_4_2021	abnormal optic choroid morphology MP:0005098	3/9	0.0390633	0.289771	5.13762	16.6591	SERPINC1;PRSS56;STRA6
CvsSt	MGI_Mammalian_Phenotype_Level_4_2021	abnormal tail development MP:0006281	3/9	0.0390633	0.289771	5.13762	16.6591	LMX1A;AXIN2;FGFR1
CvsSt	MGI_Mammalian_Phenotype_Level_4_2021	absent enteric neurons MP:0001048	3/9	0.0390633	0.289771	5.13762	16.6591	EDNRB;EDN3;GFRA1
CvsSt	MGI_Mammalian_Phenotype_Level_4_2021	decreased circulating interleukin-10 level MP:0008594	3/9	0.0390633	0.289771	5.13762	16.6591	IL10;CYBB;MMP9
CvsSt	MGI_Mammalian_Phenotype_Level_4_2021	decreased collagen level MP:0020254	3/9	0.0390633	0.289771	5.13762	16.6591	COL1A1;HSD11B1;TNNI2
CvsSt	MGI_Mammalian_Phenotype_Level_4_2021	decreased glucagon secretion MP:0002711	3/9	0.0390633	0.289771	5.13762	16.6591	SNAP25;KCNJ11;DBH
CvsSt	MGI_Mammalian_Phenotype_Level_4_2021	delayed dark adaptation MP:0003011	3/9	0.0390633	0.289771	5.13762	16.6591	RDH12;RDH5;RLBP1
CvsSt	MGI_Mammalian_Phenotype_Level_4_2021	hemolysis MP:0010163	3/9	0.0390633	0.289771	5.13762	16.6591	SLC4A1;ANK1;SPTB
CvsSt	MGI_Mammalian_Phenotype_Level_4_2021	hypochromic anemia MP:0008387	3/9	0.0390633	0.289771	5.13762	16.6591	IL10;TF;ANK1
CvsSt	MGI_Mammalian_Phenotype_Level_4_2021	increased hemoglobin concentration distribution width MP:0008850	3/9	0.0390633	0.289771	5.13762	16.6591	KCNN4;ANK1;ZFPM1
CvsSt	MGI_Mammalian_Phenotype_Level_4_2021	increased susceptibility to atherosclerosis MP:0005339	3/9	0.0390633	0.289771	5.13762	16.6591	TNFSF4;RORA;APOE
CvsSt	MGI_Mammalian_Phenotype_Level_4_2021	mammary gland hyperplasia MP:0000630	3/9	0.0390633	0.289771	5.13762	16.6591	CDH3;CDKN2C;APC
CvsSt	MGI_Mammalian_Phenotype_Level_4_2021	ocular hypertension MP:0005258	3/9	0.0390633	0.289771	5.13762	16.6591	BMP4;COL1A1;PRSS56
CvsSt	MGI_Mammalian_Phenotype_Level_4_2021	renal glomerulus fibrosis MP:0011377	3/9	0.0390633	0.289771	5.13762	16.6591	NPHS1;NOS3;KCTD11
CvsSt	MGI_Mammalian_Phenotype_Level_4_2021	small frontal bone MP:0004377	3/9	0.0390633	0.289771	5.13762	16.6591	GJA1;BMP1;SCUBE1
CvsSt	MGI_Mammalian_Phenotype_Level_4_2021	small scapula MP:0004343	3/9	0.0390633	0.289771	5.13762	16.6591	CHST11;TNNI2;CACNA1S
CvsSt	MGI_Mammalian_Phenotype_Level_4_2021	small visceral yolk sac MP:0012131	3/9	0.0390633	0.289771	5.13762	16.6591	HNF4A;LMO2;FGFR1
CvsSt	MGI_Mammalian_Phenotype_Level_4_2021	abnormal B cell activation MP:0008217	6/29	0.0391175	0.289771	2.68254	8.69459	PTPRC;IRF4;DAPP1;FAS;APOE;IL12RB2
CvsSt	MGI_Mammalian_Phenotype_Level_4_2021	absent mature ovarian follicles MP:0001132	6/29	0.0391175	0.289771	2.68254	8.69459	FADS2;EGR1;GJA1;APC;NPC1;VGF
CvsSt	MGI_Mammalian_Phenotype_Level_4_2021	decreased ovary weight MP:0004856	6/29	0.0391175	0.289771	2.68254	8.69459	ASPM;NPC1;VGF;TET1;CFTR;GALP
CvsSt	MGI_Mammalian_Phenotype_Level_4_2021	enhanced paired-pulse facilitation MP:0002919	6/29	0.0391175	0.289771	2.68254	8.69459	C3;PTPRD;SNAP25;DLG4;FGF22;FOXP2
CvsSt	MGI_Mammalian_Phenotype_Level_4_2021	increased liver tumor incidence MP:0008019	6/29	0.0391175	0.289771	2.68254	8.69459	PLK3;BHMT;APC;NR1H4;TSPAN33;BUB1
CvsSt	MGI_Mammalian_Phenotype_Level_4_2021	increased lung tumor incidence MP:0008014	6/29	0.0391175	0.289771	2.68254	8.69459	COL1A1;PLK3;DOK2;CDKN2C;GPRC5A;BUB1
CvsSt	MGI_Mammalian_Phenotype_Level_4_2021	rectal prolapse MP:0000493	6/29	0.0391175	0.289771	2.68254	8.69459	IL10;APC;AGR2;JAK3;SLC26A3;LOXL1
CvsSt	MGI_Mammalian_Phenotype_Level_4_2021	renal cast MP:0011402	6/29	0.0391175	0.289771	2.68254	8.69459	NOS3;SLC7A9;C1GALT1;FAS;PRDX6;TLR4
CvsSt	MGI_Mammalian_Phenotype_Level_4_2021	decreased circulating fructosamine level MP:0010088	11/69	0.0399425	0.292779	1.952	6.28605	SLC7A8;VGF;MAN2B2;HEXB;NMU;PEAR1;RAP1GAP;SLC7A2;IFNAR1;SIDT2;WDTC1
CvsSt	MGI_Mammalian_Phenotype_Level_4_2021	increased macrophage cell number MP:0005425	11/69	0.0399425	0.292779	1.952	6.28605	LMBR1L;DPP4;STEAP4;NPC1;IL18;LCN2;ASL;PPT2;CCR4;JAK3;MMP9
CvsSt	MGI_Mammalian_Phenotype_Level_4_2021	abnormal basisphenoid bone morphology MP:0000106	5/22	0.0403309	0.292779	3.02372	9.70806	DLX2;EDNRA;DLX6;PTCH1;FGFR1
CvsSt	MGI_Mammalian_Phenotype_Level_4_2021	abnormal circulating insulin level MP:0001560	5/22	0.0403309	0.292779	3.02372	9.70806	GLP1R;KLB;HSD11B1;GAL;SORBS1
CvsSt	MGI_Mammalian_Phenotype_Level_4_2021	abnormal endochondral bone ossification MP:0008272	5/22	0.0403309	0.292779	3.02372	9.70806	SCUBE2;COL10A1;DCHS1;HSPG2;PAPSS2
CvsSt	MGI_Mammalian_Phenotype_Level_4_2021	abnormal interferon level MP:0008750	5/22	0.0403309	0.292779	3.02372	9.70806	IL10;CXCL10;KIT;IL18;TNFRSF10A
CvsSt	MGI_Mammalian_Phenotype_Level_4_2021	abnormal tumor vascularization MP:0010144	5/22	0.0403309	0.292779	3.02372	9.70806	CAV2;ITGB3;IL1B;CCM2L;IL12RB2
CvsSt	MGI_Mammalian_Phenotype_Level_4_2021	absent spleen germinal center MP:0008474	5/22	0.0403309	0.292779	3.02372	9.70806	SOCS1;IRF4;POU2AF1;TNF;HLA-DQB1
CvsSt	MGI_Mammalian_Phenotype_Level_4_2021	absent startle reflex MP:0006359	5/22	0.0403309	0.292779	3.02372	9.70806	CLIC5;GPSM2;KCNJ10;LRRC4;MYO7A
CvsSt	MGI_Mammalian_Phenotype_Level_4_2021	hypopigmentation MP:0005408	5/22	0.0403309	0.292779	3.02372	9.70806	KITLG;PAH;TYR;LYST;SLC24A5
CvsSt	MGI_Mammalian_Phenotype_Level_4_2021	abnormal cerebral cortex morphology MP:0000788	21/158	0.0403598	0.292779	1.57975	5.07087	SNAP25;SLC20A2;GPT2;KIF14;MSI1;FRS2;TNF;SORCS2;LMNB2;ARHGAP33;CUX2;NPC1;CCDC85C;PAH;LHX6;NEFL;APOE;OTX1;PPT2;CDON;JAM3
CvsSt	MGI_Mammalian_Phenotype_Level_4_2021	abnormal CNS synaptic transmission MP:0002206	15/104	0.0412512	0.298606	1.73564	5.53335	CHRM2;SNAP25;DAGLA;CAMK2A;SEZ6;EN1;CACNA1C;ADCY1;LRFN2;DLG2;DLG4;ADORA1;PDE4B;ERC2;LZTS1
CvsSt	MGI_Mammalian_Phenotype_Level_4_2021	micrognathia MP:0002639	10/61	0.041318	0.298606	2.01774	6.42945	CYP26B1;EDNRA;PTK7;SATB2;WNT5A;FBLN1;CACNA1S;DRC1;DNAI1;ROBO1
CvsSt	MGI_Mammalian_Phenotype_Level_4_2021	abnormal trabecular bone morphology MP:0000130	17/122	0.0416281	0.299653	1.66774	5.30171	IL10;EGR1;MSX2;PTH;SATB2;PCOLCE;TNF;HSPG2;FOXN1;MMP9;RUNX2;PAPSS2;SCUBE2;COL1A1;RASSF2;PLCG2;COL10A1
CvsSt	MGI_Mammalian_Phenotype_Level_4_2021	impaired neutrophil chemotaxis MP:0008720	7/37	0.041733	0.299653	2.39981	7.62292	MDK;ALOX5;PLA2G10;PDE4B;IL18;TLR4;PIK3R5
CvsSt	MGI_Mammalian_Phenotype_Level_4_2021	lethality at weaning, incomplete penetrance MP:0011084	7/37	0.041733	0.299653	2.39981	7.62292	VIPR1;PTPRC;HEY2;KIT;RORA;ZNF423;HCN2
CvsSt	MGI_Mammalian_Phenotype_Level_4_2021	abnormal erythrocyte morphology MP:0002447	12/78	0.0417741	0.299653	1.87157	5.94314	PPP1R15A;STEAP3;ADAMTS13;CDK6;KIT;PTCH2;SLC40A1;SLC4A1;ASL;ANK1;SPTB;TSPAN33
CvsSt	MGI_Mammalian_Phenotype_Level_4_2021	impaired skin barrier function MP:0002796	9/53	0.042277	0.302697	2.10449	6.65758	CYP26B1;GJA1;FABP5;ELOVL3;RASSF9;OVOL1;TGM3;PNPLA1;NSMAF
CvsSt	MGI_Mammalian_Phenotype_Level_4_2021	abnormal osteoblast physiology MP:0005006	8/45	0.0425556	0.304126	2.22417	7.02157	COL1A1;GJA1;KITLG;NOS3;MGP;APOE;AXIN2;CTHRC1
CvsSt	MGI_Mammalian_Phenotype_Level_4_2021	decreased bone mineral density MP:0000063	45/391	0.0433475	0.308727	1.34325	4.21581	COL16A1;DGKD;LPGAT1;SLC20A2;SATB2;FHL2;SLC40A1;AKAP7;NCALD;LRP6;SMPD3;CACNA1I;GJA1;PRSS50;RASSF2;ATP6V0A4;WNT10B;EGR1;GPR15;CAMK1D;MSX2;TMEM178A;NOS3;IQSEC3;NR1H4;ADAM32;KRT77;APTX;FOSL2;COL1A1;KITLG;GOLPH3;CRISPLD2;PAPPA;MGP;CRH;ATG4B;ALDOB;GNB5;TOX;ASPA;DGKI;PPARD;IFNAR1;FBN1
CvsSt	MGI_Mammalian_Phenotype_Level_4_2021	abnormal embryonic tissue morphology MP:0002085	20/150	0.0433597	0.308727	1.58525	4.97486	FKBP10;DDC;FOXF1;TXNRD1;WNT5A;PMM2;HNF1B;CACNA1C;FOXN1;CENPA;POR;CYP26B1;BMP1;APC;HNF4A;KDR;MSX1;ABCD1;S100A8;FGFR1
CvsSt	MGI_Mammalian_Phenotype_Level_4_2021	abnormal spinal cord morphology MP:0000955	11/70	0.0437398	0.309494	1.91881	6.0049	GRIA1;GRIA2;GDF11;MANBA;KCNJ10;HEXB;KIF14;PDE4B;IFT57;PCSK5;ABCD1
CvsSt	MGI_Mammalian_Phenotype_Level_4_2021	decreased susceptibility to injury MP:0005166	11/70	0.0437398	0.309494	1.91881	6.0049	C3;COL1A1;IL1B;AGTR1;FAM3D;ITGB6;KCNN4;MMP9;SORCS2;TLR4;SLC29A2
CvsSt	MGI_Mammalian_Phenotype_Level_4_2021	abnormal humoral immune response MP:0001800	14/96	0.0438691	0.309494	1.7579	5.49615	PRKCB;C5AR1;DAPP1;TNFRSF13C;TNF;FOXN1;DUSP14;RASGRP3;C3;PTPRC;HEPHL1;PLCG2;ARHGEF6;HLA-DQB1
CvsSt	MGI_Mammalian_Phenotype_Level_4_2021	abnormal miniature excitatory postsynaptic currents MP:0004753	14/96	0.0438691	0.309494	1.7579	5.49615	CYFIP2;NLGN3;LGI1;SNAP25;C1QA;CLSTN3;SORBS2;CPLX1;SHISA7;LRFN2;CACNG8;TSPAN7;LZTS1;FGF22
CvsSt	MGI_Mammalian_Phenotype_Level_4_2021	increased susceptibility to induced colitis MP:0008537	14/96	0.0438691	0.309494	1.7579	5.49615	IL10;TKTL1;GPR15;GPR35;NOS3;MST1;IL18;APOA4;FNDC4;ADAMTS18;TRPV5;TFF3;AGR2;FAM3D
CvsSt	MGI_Mammalian_Phenotype_Level_4_2021	decreased testis weight MP:0004852	27/216	0.0441768	0.311095	1.47309	4.59538	GAL3ST1;SYCP2;DDX25;PRDM1;TNF;LIPE;FADS2;GJA1;SULT1E1;FYN;BCO2;BUB1;EGR1;EGR4;TSC22D3;OVOL1;ATAT1;ASPM;CCNA1;CPEB1;KITLG;EHD4;GAL;CDK6;VGF;KIT;NABP1
CvsSt	MGI_Mammalian_Phenotype_Level_4_2021	abnormal emotion/affect behavior MP:0002572	6/30	0.0453557	0.314292	2.57062	7.9515	GRIA1;GRIA2;CADPS2;KCNJ11;CHRNA4;HCN2
CvsSt	MGI_Mammalian_Phenotype_Level_4_2021	abnormal stria vascularis morphology MP:0000048	6/30	0.0453557	0.314292	2.57062	7.9515	EDNRB;KCNJ10;TYRP1;KIT;FAS;APOE
CvsSt	MGI_Mammalian_Phenotype_Level_4_2021	decreased retinal photoreceptor cell number MP:0001327	6/30	0.0453557	0.314292	2.57062	7.9515	GDF11;SEMA4A;PDE6B;MERTK;TYR;RLBP1
CvsSt	MGI_Mammalian_Phenotype_Level_4_2021	decreased susceptibility to autoimmune diabetes MP:0004804	6/30	0.0453557	0.314292	2.57062	7.9515	CD4;IFNGR2;TNFSF4;FAS;MERTK;B2M
CvsSt	MGI_Mammalian_Phenotype_Level_4_2021	increased susceptibility to type I hypersensitivity reaction MP:0005596	6/30	0.0453557	0.314292	2.57062	7.9515	HPGDS;FYN;PIP5K1B;ENPP3;FCGR2B;PTGES
CvsSt	MGI_Mammalian_Phenotype_Level_4_2021	decreased NK cell number MP:0008045	12/79	0.0454388	0.314292	1.84354	5.69909	LMBR1L;PTPRC;APC;IL15;PRKCE;IFNE;IRF1;NIPAL3;ATP13A5;TOX;JAK3;IFNAR1
CvsSt	MGI_Mammalian_Phenotype_Level_4_2021	abnormal innervation MP:0002184	9/54	0.0468965	0.314292	2.05761	6.2959	EFNB3;DLG4;EN1;KCTD11;SEMA3F;NPTX1;NPTX2;SORCS2;JAM3
CvsSt	MGI_Mammalian_Phenotype_Level_4_2021	small lung MP:0003641	9/54	0.0468965	0.314292	2.05761	6.2959	DAGLA;FOXF1;HHIP;ADAMTS18;MGP;FBLN1;DCHS1;CELSR1;PCSK5
CvsSt	MGI_Mammalian_Phenotype_Level_4_2021	increased incidence of tumors by chemical induction MP:0004499	14/97	0.0472531	0.314292	1.73662	5.30058	EGR1;DUSP5;SLC7A11;APC;ADAMTS18;IRF1;FAM3D;MAP3K6;BUB1;BCL2L14;EPHA2;IFNAR1;LTF;PPARD
CvsSt	MGI_Mammalian_Phenotype_Level_4_2021	abnormal chondrocyte morphology MP:0000166	7/38	0.0473868	0.314292	2.32227	7.08156	COL27A1;MIA;COL11A2;NCDN;HSPG2;PAPSS2;RUNX2
CvsSt	MGI_Mammalian_Phenotype_Level_4_2021	abnormal depression-related behavior MP:0003360	7/38	0.0473868	0.314292	2.32227	7.08156	PEX5L;CAMK2A;CASKIN1;FAM3D;HCN2;PTPRG;HCN1
CvsSt	MGI_Mammalian_Phenotype_Level_4_2021	decreased osteoblast cell number MP:0004989	7/38	0.0473868	0.314292	2.32227	7.08156	SCUBE2;RASSF2;PTH;CRH;TNNI2;RUNX2;CTHRC1
CvsSt	MGI_Mammalian_Phenotype_Level_4_2021	decreased systemic arterial systolic blood pressure MP:0006264	7/38	0.0473868	0.314292	2.32227	7.08156	ACTA2;RGS5;DDC;PTPRC;AGTR1;CYBB;KCTD11
CvsSt	MGI_Mammalian_Phenotype_Level_4_2021	increased circulating interferon-gamma level MP:0008577	7/38	0.0473868	0.314292	2.32227	7.08156	IL10;SOCS1;IRF1;DHX58;TNFRSF10A;MMP9;RAMP1
CvsSt	MGI_Mammalian_Phenotype_Level_4_2021	thin retinal inner nuclear layer MP:0008511	7/38	0.0473868	0.314292	2.32227	7.08156	BMP4;SEMA4A;HKDC1;NCAM1;RORB;APOE;GNAT1
CvsSt	MGI_Mammalian_Phenotype_Level_4_2021	abnormal bone marrow cell number MP:0000172	4/16	0.047468	0.314292	3.42588	10.4411	ALOX15;PTCH2;SLC4A1;ZFPM1
CvsSt	MGI_Mammalian_Phenotype_Level_4_2021	abnormal bronchus morphology MP:0002264	4/16	0.047468	0.314292	3.42588	10.4411	SHH;NOTUM;CFTR;ROBO1
CvsSt	MGI_Mammalian_Phenotype_Level_4_2021	abnormal endplate potential MP:0002914	4/16	0.047468	0.314292	3.42588	10.4411	SNAP25;UCHL1;NRG1;HSPG2
CvsSt	MGI_Mammalian_Phenotype_Level_4_2021	abnormal interparietal bone morphology MP:0000077	4/16	0.047468	0.314292	3.42588	10.4411	LMX1A;DLX6;PTCH1;RUNX2
CvsSt	MGI_Mammalian_Phenotype_Level_4_2021	abnormal medulla oblongata morphology MP:0000846	4/16	0.047468	0.314292	3.42588	10.4411	UCHL1;MYCN;SCUBE1;ZNF423
CvsSt	MGI_Mammalian_Phenotype_Level_4_2021	abnormal postsynaptic density morphology MP:0020551	4/16	0.047468	0.314292	3.42588	10.4411	LRFN2;CTTNBP2;CAMK2A;LHFPL3
CvsSt	MGI_Mammalian_Phenotype_Level_4_2021	abnormal serotonin level MP:0005322	4/16	0.047468	0.314292	3.42588	10.4411	GRIA1;SNAP25;NOS3;PTS
CvsSt	MGI_Mammalian_Phenotype_Level_4_2021	abnormal sinoatrial node conduction MP:0006142	4/16	0.047468	0.314292	3.42588	10.4411	GNB5;BVES;HCN2;HCN1
CvsSt	MGI_Mammalian_Phenotype_Level_4_2021	abnormal spermatogonia proliferation MP:0002685	4/16	0.047468	0.314292	3.42588	10.4411	GAL3ST1;TSC22D3;KIT;VRK1
CvsSt	MGI_Mammalian_Phenotype_Level_4_2021	abnormal stomach glandular epithelium morphology MP:0000473	4/16	0.047468	0.314292	3.42588	10.4411	SLC9A2;SHH;HHIP;AGR2
CvsSt	MGI_Mammalian_Phenotype_Level_4_2021	decreased eye pigmentation MP:0005172	4/16	0.047468	0.314292	3.42588	10.4411	SEMA4A;TYRP1;TYR;LYST
CvsSt	MGI_Mammalian_Phenotype_Level_4_2021	decreased urine potassium level MP:0005618	4/16	0.047468	0.314292	3.42588	10.4411	VAV3;SCNN1G;UPK2;AGTR1
CvsSt	MGI_Mammalian_Phenotype_Level_4_2021	impaired muscle relaxation MP:0003157	4/16	0.047468	0.314292	3.42588	10.4411	SCN4A;APOE;CASQ1;COL19A1
CvsSt	MGI_Mammalian_Phenotype_Level_4_2021	increased incidence of corneal inflammation MP:0001313	4/16	0.047468	0.314292	3.42588	10.4411	SOCS1;NRTN;FOXN1;CAMP
CvsSt	MGI_Mammalian_Phenotype_Level_4_2021	white spotting MP:0002938	4/16	0.047468	0.314292	3.42588	10.4411	KITLG;EDNRB;LMX1A;KIT
CvsSt	MGI_Mammalian_Phenotype_Level_4_2021	abnormal neural tube closure MP:0003720	15/106	0.0475815	0.314292	1.69731	5.16883	FHOD3;EGR1;UHRF1;PTCH1;CCNF;TMEM132A;SLC40A1;TET1;CELSR1;PCSK5;LRP6;BMP4;SCUBE1;TRPM6;FGFR1
CvsSt	MGI_Mammalian_Phenotype_Level_4_2021	abnormal interleukin level MP:0008751	8/46	0.0476648	0.314292	2.16552	6.59088	IL10;SOCS1;KIT;PLA2G10;IL18;FAS;B2M;TLR4
CvsSt	MGI_Mammalian_Phenotype_Level_4_2021	decreased osteoclast cell number MP:0004985	8/46	0.0476648	0.314292	2.16552	6.59088	C3;RASSF2;MSX2;PTH;PCDH7;C5AR1;PLCG2;COL10A1
CvsSt	MGI_Mammalian_Phenotype_Level_4_2021	abnormal anxiety-related response MP:0001362	5/23	0.0478944	0.314292	2.85557	8.6774	CYFIP2;HRH3;DLG4;CASKIN1;CPLX2
CvsSt	MGI_Mammalian_Phenotype_Level_4_2021	abnormal energy expenditure MP:0005450	5/23	0.0478944	0.314292	2.85557	8.6774	KLB;C3;HRH3;NPY1R;PPARD
CvsSt	MGI_Mammalian_Phenotype_Level_4_2021	abnormal pulmonary artery morphology MP:0000484	5/23	0.0478944	0.314292	2.85557	8.6774	SHH;FOXF1;NOS3;HEY2;ABCD1
CvsSt	MGI_Mammalian_Phenotype_Level_4_2021	decreased susceptibility to weight gain MP:0010182	5/23	0.0478944	0.314292	2.85557	8.6774	HSD11B1;AHSG;NR1H4;FOXO6;HSPA12A
CvsSt	MGI_Mammalian_Phenotype_Level_4_2021	increased cerebral infarction size MP:0006060	5/23	0.0478944	0.314292	2.85557	8.6774	IL10;NDRG4;NEIL3;CAMK2A;HSPA12A
CvsSt	MGI_Mammalian_Phenotype_Level_4_2021	increased T cell apoptosis MP:0006413	5/23	0.0478944	0.314292	2.85557	8.6774	DUSP5;CDK6;PTPRC;DHX58;MERTK
CvsSt	MGI_Mammalian_Phenotype_Level_4_2021	retinal rod cell degeneration MP:0008451	5/23	0.0478944	0.314292	2.85557	8.6774	LRAT;PDE6B;MYO7A;CACNA1F;MERTK
CvsSt	MGI_Mammalian_Phenotype_Level_4_2021	abnormal cone electrophysiology MP:0004022	12/80	0.0493193	0.31969	1.81633	5.46612	ACTA2;TRPM1;GUCY2D;WHRN;LRIT1;PDE6B;RORB;GNAT1;CACNA1F;MERTK;CPLX3;STRA6
CvsSt	MGI_Mammalian_Phenotype_Level_4_2021	decreased vertical activity MP:0002757	24/190	0.0499665	0.31969	1.49018	4.46518	GRIA1;CAMK2B;NLGN3;SNAP25;KCNJ11;LRRC49;SEZ6;CYBB;CPT1C;CPLX2;TNF;COL1A1;CDH4;KIAA1549;DLG4;TSPAN18;CASKIN1;ACER3;LHX6;NRCAM;APOD;APOE;ABCD1;ASPA
CvsSt	Jensen_TISSUES	Cuticle	22/62	6.75234e-09	6.58939e-06	5.70194	107.273	KRTAP24-1;KRT71;KRT82;KRTAP27-1;KRT35;HOXC13;KRT32;KRT31;KRT74;NKD1;KRT40;KRT84;LGALS4;TMEM37;KRT33A;KRT28;KRT27;KRT25;KRT36;S100A3;NOTUM;CER1
CvsSt	Jensen_TISSUES	Immune system	147/1046	1.05854e-08	6.58939e-06	1.73904	31.9354	CDA;CD84;VIPR1;UBE2D1;TNF;LGALS4;HPGDS;GJA1;ALCAM;PNP;ANPEP;KDR;GGT1;B2M;RBFOX3;CD93;LMO2;WNT5A;CYBB;HSPG2;HLA-E;MAF;TYROBP;MYCN;SLPI;PLA2G10;AGTR1;CYP2E1;S100A9;S100A8;CARD11;ABCG1;PTGES;FLG;C5AR1;LY96;GATA2;CSF2RA;KNG1;C3;DPP4;SOCS1;PLCG2;PMAIP1;APOE;PI3;A2M;KCNN4;WDTC1;CCR1;EGR1;GPR15;TNFSF12;TNFRSF10A;SMAD7;CXCL10;MARCO;TF;PTPRC;CDK6;IL7;ALB;LCN2;HLA-DRA;SLC26A3;NES;ADA;BCL2L1;SLC26A5;FGFR1;I…
CvsSt	Jensen_TISSUES	Synovia	19/63	1.28831e-06	0.00053465	4.4681	60.5972	IL10;MIA;IL15;IL18;UBE2D1;TNF;MMP9;CD4;IL1B;KIT;PLA2G10;ALB;PADI2;S100A12;CCL2;PADI4;CD69;A2M;B2M
CvsSt	Jensen_TISSUES	Hair shaft	11/24	2.20162e-06	0.000685255	8.73049	113.726	KRT71;KRTAP11-1;KRT33A;SLC22A14;KRT28;KRT27;LIPH;KRT25;PRR9;GPRC5D;B4GALT4
CvsSt	Jensen_TISSUES	Adult	122/918	3.63603e-06	0.000905372	1.61495	20.2266	SLC4A1;TNF;LGALS4;CDH5;HPGDS;HOXA9;GJA1;ALCAM;PNP;CYP2D6;TUBB3;ANPEP;ADORA1;KDR;BAALC;NRTN;GGT1;SOX6;B2M;RBFOX3;IGFBP4;IGFBP2;WNT5A;CYBB;FOXP2;RUNX2;MYCN;RBP1;AGTR1;CYP2E1;S100A8;CFTR;FLG;GRIA1;GRIA2;CHRNA4;LY96;GATA4;KLK3;CACNA1C;GATA2;NID1;KNG1;C3;HSD11B1;DPP4;ADAMTS13;APOE;A2M;WDTC1;EGR1;GFPT2;ST8SIA2;PTCH1;TNFRSF10A;COL1A1;BMP4;CXCL10;TF;PTPRC;GJB1;IL7;DLG4;ALB;LCN2;NES;FBN1;BCL2L1;FGFR1;GLP1…
CvsSt	Jensen_TISSUES	Mast cell	32/154	4.38585e-06	0.000910064	2.72251	33.588	GPSM2;CCL11;C5AR1;GATA2;TNF;KNG1;UCHL1;ALOX5;PLCG2;CCL2;FYN;ENPP3;CAMP;IL10;SRGN;CCL22;CMA1;IL18;MMP9;CD2;CXCL10;CD4;KITLG;PTPRC;TNFSF4;IL1B;ALB;KIT;CRH;LCP2;FCGR2B;TLR4
CvsSt	Jensen_TISSUES	Plasma cell	49/286	5.87299e-06	0.00104455	2.15335	25.9374	ITGB3;DBH;C8B;PTPRG;CDH5;SHH;ALCAM;MDK;ANPEP;NRCAM;B2M;CHST7;VWF;AHSG;SERPINF1;MST1;RNASE4;HSPG2;F5;OLFM1;KIT;FETUB;COL6A3;CDHR5;IGFALS;C1QA;LRP1;SERPINC1;FGL2;SLC3A2;KNG1;C3;DPP4;ADAMTS13;HLA-DMB;APOD;NCAM1;A2M;CA11;AMBP;MERTK;VASN;MARCO;MFAP4;TF;VNN2;FAP;LCN2;FGFR1
CvsSt	Jensen_TISSUES	Alveolar bone	19/70	7.29407e-06	0.00113514	3.85335	45.5791	DLX2;DLX3;MSX2;LAMC3;PTH;SATB2;AMBN;LEF1;TNF;MMP9;RUNX2;MMP20;BMP4;SHH;ADAM28;IL1B;LHX6;FAM20A;MSX1
CvsSt	Jensen_TISSUES	Artery	54/336	1.38185e-05	0.00191156	1.99518	22.3251	LRSAM1;SLC4A1;DBH;PCSK5;GJA1;EDNRA;EDNRB;HEY2;ADORA1;PDE4A;IL10;ACOT7;PTGIS;EDN3;AHSG;IL18;CYBB;DNTT;MMP9;RUNX2;ACTA2;MRAS;PAPPA;IL1B;SNORD46;AGTR1;ABCG1;HBEGF;PTH;SERPINC1;CACNA1C;PLA2G7;TSPAN33;KNG1;SELENBP1;SULT1E1;ALOX5;CCL2;APOE;KCNN4;WDTC1;EGR1;ZG16B;CMA1;NOS3;FABP3;CTH;ALB;MGP;ALOX5AP;LCN2;NOX4;RAMP1;FBN1
CvsSt	Jensen_TISSUES	Ectoderm	27/136	5.53844e-05	0.00677076	2.56558	25.1458	DLX2;DLX3;DLX6;LEF1;GATA4;GATA2;MMP20;WNT6;SHH;WNT11;HNF4A;NCAM1;MSX1;SOX6;WNT3;EMX1;MSX2;AMBN;PTCH1;EN1;RUNX2;EDAR;BMP4;ALDH1A3;LMX1A;LHX6;FGFR1
CvsSt	Jensen_TISSUES	Mesenchymal stem cell	30/159	5.9822e-05	0.00677076	2.41016	23.4367	GATA4;TNF;ELAVL3;CDH5;GJA1;SHH;ALCAM;ANPEP;KDR;COL10A1;CCL2;IL10;MSX2;ITGA4;VWF;WNT5A;MMP9;RUNX2;COL1A1;BMP4;CD4;KITLG;PTPRC;FABP4;IL1B;ALB;KIT;NES;TLR4;IDO1
CvsSt	Jensen_TISSUES	Neural crest	27/138	7.20677e-05	0.00747703	2.51908	24.0267	DLX2;DLX3;DLX6;TYRP1;DBH;EDNRA;SHH;UCHL1;EDNRB;NRTN;NCAM1;MSX1;MSX2;EDN3;NRG1;GFRA1;TYR;BMP4;OLFM1;KITLG;MYCN;DCT;RBP1;KIT;NES;KBTBD8;FGFR1
CvsSt	Jensen_TISSUES	Ganglion	49/323	0.000147844	0.0141589	1.85874	16.3928	SNAP25;FAAH;DBH;TNF;SHH;UCHL1;EDNRB;GRM4;TUBB3;ADORA1;TSPO;NRTN;RBFOX3;NPY1R;DNTT;GFRA1;NRG1;OPRM1;ANK1;FOXP2;CORT;GAL;LMX1A;IL1B;CRH;GRIA1;GRIA2;DDC;MAOB;CHRNA4;CDNF;TMTC1;KNG1;HRH3;SNCG;NCAM1;APOE;ASIC2;WDTC1;EGR1;GSX2;TRPV2;CCK;PTK7;DLG4;ALB;LHX6;ATP13A2;NES
CvsSt	Jensen_TISSUES	Blood vessel wall	10/30	0.00016981	0.015101	5.15402	44.7412	SERPINC1;NOS3;IL1B;ALB;CCL2;NOX4;APOE;MMP9;KNG1;WDTC1
CvsSt	Jensen_TISSUES	Vascular cell	12/43	0.000261636	0.0217158	3.99232	32.9309	CDH5;VWF;NOS3;IL1B;MGP;KDR;CCL2;CYBB;NOX4;APOE;TNF;MMP9
CvsSt	Jensen_TISSUES	Atherosclerotic plaque	16/69	0.000285346	0.0222035	3.11681	25.4388	IL10;VWF;CMA1;NOS3;IL18;TNF;MMP9;PLA2G7;IL1B;PAPPA;ALB;AGTR1;CCL2;APOE;TLR4;ABCG1
CvsSt	Jensen_TISSUES	Fibrosarcoma cell	7/17	0.000376097	0.0275436	7.20735	56.8347	UCK2;GDF15;HESX1;STC1;MMP9;HSPG2;AJAP1
CvsSt	Jensen_TISSUES	ae2	9/28	0.000488307	0.0337746	4.88026	37.2099	FLG;SLC9A2;SLC4A8;SLC4A9;CA2;SLC4A1;ATP6V0A4;SLC26A3;CFTR
CvsSt	Jensen_TISSUES	Blood vessel endothelium	23/124	0.000533196	0.0343988	2.35426	17.7432	IL10;EGR1;PTGIS;EDN3;SERPINC1;NOS3;CYBB;DNTT;MMP9;KNG1;GJA1;EDNRA;TF;EDNRB;IL1B;ALB;AGTR1;NOX4;CCL2;APOE;EPHA2;WDTC1;HBEGF
CvsSt	Jensen_TISSUES	Microvessel	8/23	0.000552592	0.0343988	5.49291	41.2017	SLC7A5;NOS3;IL1B;ALB;DNTT;VASH1;MMP9;KNG1
CvsSt	Jensen_TISSUES	Molaris	13/53	0.00058465	0.0346614	3.35213	24.9549	MSX2;AMBN;RUNX2;MMP20;EDAR;BMP4;SHH;UCHL1;OAF;IL1B;FAM20A;MSX1;NES
CvsSt	Jensen_TISSUES	Stromal cell	30/182	0.000688445	0.0389597	2.04286	14.8743	PTH;TNF;DPP4;GJA1;SHH;NT5E;ALCAM;ANPEP;KDR;CCL2;NCAM1;IL10;ITGA4;VWF;IGFBP4;IL15;WNT5A;IGFBP2;MMP9;RUNX2;BMP4;CXCL10;CD4;KITLG;PTPRC;IL7;IL1B;KIT;NES;HBEGF
CvsSt	Jensen_TISSUES	Blood plasma	29/176	0.0008429	0.0424281	2.04133	14.4499	DDC;MAOB;SERPINC1;PLA2G7;ACACA;CRHBP;LIPE;FADS2;ADAMTS13;CYP2D6;UCP3;APOD;A2M;FADS1;GCKR;VWF;GPX3;GFPT2;OMD;APOA4;CCK;CHD1L;F5;ATAT1;CORT;BHMT;DDAH2;CRH;BPI
CvsSt	Jensen_TISSUES	Vascular tissue	9/30	0.00085969	0.0424281	4.41499	31.1651	GPSM2;GOLPH3;VWF;NOS3;CMA1;PTCHD3;APOE;IGSF9;KNG1
CvsSt	Jensen_TISSUES	Tooth enamel	14/62	0.000890544	0.0424281	3.0087	21.1322	SPAG16;SRGN;SLC24A4;CA10;DLX3;MSX2;AMBN;PLK2;WDR72;RUNX2;MMP20;BMP4;ALB;FAM20A
CvsSt	Jensen_TISSUES	Marrow	19/98	0.000902744	0.0424281	2.48377	17.4114	ITGA4;PTH;ITGB3;CTPS1;DNTT;TNF;RUNX2;CD2;TF;CD4;KITLG;PTPRC;IL7;ANPEP;IL1B;ALB;KIT;NCAM1;B2M
CvsSt	Jensen_TISSUES	Vasculature	22/121	0.000920128	0.0424281	2.29634	16.0537	EDN3;VWF;NOS3;CYBB;TNF;MMP9;KNG1;CDH5;RGS5;EDNRA;EDNRB;PTPRC;ANPEP;IL1B;ALB;CA4;KDR;AGTR1;NOX4;CCL2;APOE;EPHA2
CvsSt	Jensen_TISSUES	Scalp	13/57	0.00121814	0.0541639	3.04672	20.4448	KRTAP24-1;KRT71;KRTAP11-1;KRTAP4-6;KRTAP17-1;KRT35;KRT74;KRT40;KRT84;KRT33A;KRT39;KRTAP3-3;KRTAP1-1
CvsSt	Jensen_TISSUES	BTO:0002979	11/44	0.00128384	0.0551167	3.43551	22.8732	IL10;MUC1;TF;CD4;SLPI;IL1B;ALB;KLK3;PI3;TNF;CFTR
CvsSt	Jensen_TISSUES	Sputum	12/51	0.0013923	0.0577805	3.17199	20.8615	IL10;CD4;CCL11;SLPI;IL1B;ALB;HSF4;A2M;TNF;MMP9;CAMP;CFTR
CvsSt	Jensen_TISSUES	Mesenchyme	38/264	0.00206013	0.0827376	1.7412	10.7693	DLX2;DLX3;CITED1;LEF1;UBE2D1;NID1;TNF;CDH5;GJA1;SHH;NT5E;ALCAM;ANPEP;SIX2;COL10A1;NCAM1;MSX1;WNT10B;MSX2;VWF;FOXF1;PTCH1;AMBN;WNT5A;MMP9;RUNX2;SMAD7;COL1A1;BMP4;ACTA2;ALDH1A3;KITLG;PTPRC;IL1B;KIT;ALDH1A1;NES;FGFR1
CvsSt	Jensen_TISSUES	Peritoneal fluid	5/12	0.0025534	0.0993433	7.34734	43.866	IL10;IL1B;ALB;CCL2;TNF
CvsSt	Jensen_TISSUES	Bronchoalveolar lavage	18/100	0.00288993	0.101984	2.2653	13.2441	IL10;CCL11;CCL22;SERPINC1;IL18;TNF;MMP9;CXCL10;MUC1;CD4;SLPI;IL1B;ALB;PDE4A;CCL2;PI3;CD69;TLR4
CvsSt	Jensen_TISSUES	Peripheral nerve	25/157	0.00298174	0.101984	1.95689	11.3798	GRIA1;GUCY2D;TMTC1;KNG1;MYOM2;LGALS4;PIEZO2;CNGA2;NRTN;NCAM1;PDE6B;ASIC2;TRPV2;TRPV3;NRG1;GFRA1;CCK;OPRM1;ANK1;GDAP1;NFASC;GJB1;GAL;GNB5;NES
CvsSt	Jensen_TISSUES	Latex	8/29	0.00299057	0.101984	3.92222	22.7971	C3;TF;CD4;VWF;IL1B;ALB;TNF;B2M
CvsSt	Jensen_TISSUES	Sweat	8/29	0.00299057	0.101984	3.92222	22.7971	EDAR;SLC4A8;SCNN1G;TSPAN7;TTK;AQP5;CAMP;CFTR
CvsSt	Jensen_TISSUES	Autonomic nervous system	14/70	0.00303084	0.101984	2.57775	14.9482	EDN3;CHRNA4;GFRA1;CCK;DBH;TNF;KNG1;UCHL1;EDNRB;GAL;IL1B;CRH;NRTN;ADAM8
CvsSt	Jensen_TISSUES	Incisor	13/63	0.00316173	0.103588	2.68023	15.4291	DLX2;WNT10A;MSX2;SATB2;AMBN;PLK2;SPRY4;MMP20;EDAR;BMP4;SHH;UCHL1;MSX1
CvsSt	Jensen_TISSUES	lat1	9/36	0.00348104	0.110098	3.43275	19.4308	SLC7A5;RBFOX1;SLC6A19;SLC7A8;SLCO3A1;SLC7A9;SLC3A2;SLC1A5;SLC7A2
CvsSt	Jensen_TISSUES	Peritoneal cavity	6/18	0.00353727	0.110098	5.14463	29.0384	IL10;CD4;IL1B;ALB;CCL2;TNF
CvsSt	Jensen_TISSUES	Periosteum	8/30	0.00376544	0.110379	3.74373	20.8971	TYROBP;ITGB3;KIT;SLCO2A1;PLCG2;CCL2;TNF;MMP9
CvsSt	Jensen_TISSUES	Lamina propria	11/50	0.00381919	0.110379	2.90601	16.1798	IL10;CD2;UCHL1;CD4;IL15;IL1B;KIT;CCR9;IL18;TNF;TLR4
CvsSt	Jensen_TISSUES	Mandibular incisor	7/24	0.00384899	0.110379	4.23799	23.563	EDAR;WNT10A;AMBN;WDR72;ITGB6;MSX1;MMP20
CvsSt	Jensen_TISSUES	BTO:0000964	35/247	0.00390094	0.110379	1.70803	9.47365	GRIA1;COLEC12;KCNE1;KCNK9;CHRNA4;SLC3A2;SLC2A5;GJA8;SLC17A1;ASIC2;BUB1;KCNH2;SLC13A2;SLC6A19;KCND1;KCNJ10;KCNJ11;NAV1;SLC2A9;SLC4A8;CPEB1;GJB1;ASTL;ALB;PDE3A;KCNQ4;SCN4A;PABPC1;RHCG;SGK2;KCNK2;CFTR;KCNK3;SLC29A2;SLC28A3
CvsSt	Jensen_TISSUES	BMMC cell	8/32	0.00577121	0.158077	3.43137	17.6883	KITLG;PTPRC;ALOX5;KIT;FYN;LCP2;GPR156;TNF
CvsSt	Jensen_TISSUES	Ileum	3/5	0.00609454	0.158077	15.4162	78.6284	FABP6;SLC10A2;CTSZ
CvsSt	Jensen_TISSUES	B-16 cell	3/5	0.00609454	0.158077	15.4162	78.6284	MIA;NXPH4;PCOLCE
CvsSt	Jensen_TISSUES	Regulatory T-lymphocyte	3/5	0.00609454	0.158077	15.4162	78.6284	IKZF2;LRRC32;FOXP2
CvsSt	Jensen_TISSUES	Synovial tissue	15/84	0.00670193	0.170284	2.24119	11.218	IL10;IL15;IL18;UBE2D1;TNFRSF10A;TNF;MMP9;CXCL10;CD4;IL1B;PADI2;CCL2;PADI4;B2M;TLR4
CvsSt	Jensen_TISSUES	Human aortic endothelial cell	5/15	0.00772708	0.192404	5.14229	25.0071	NOS3;NOX4;CCL2;APOE;TNF
CvsSt	Jensen_TISSUES	Mature cell	4/10	0.0084045	0.193771	6.85403	32.7553	CD4;KITLG;KIT;CD48
CvsSt	Jensen_TISSUES	Melanocyte cell line	4/10	0.0084045	0.193771	6.85403	32.7553	PMEL;MLANA;TYRP1;TYR
CvsSt	Jensen_TISSUES	ae1	4/10	0.0084045	0.193771	6.85403	32.7553	SLC4A9;ATP6V0A4;SLC4A1;AEBP1
CvsSt	Jensen_TISSUES	melan-a cell	4/10	0.0084045	0.193771	6.85403	32.7553	PMEL;DCT;MLANA;TYR
CvsSt	Jensen_TISSUES	Blood clot	12/63	0.00869995	0.196935	2.42404	11.5007	ADAMTS13;VWF;SERPINC1;NOS3;ITGB3;ALB;PLCG2;APOE;MMP9;TSPAN33;EPHA2;WDTC1
CvsSt	Jensen_TISSUES	Bud	17/103	0.0090715	0.201679	2.03833	9.58548	GDF11;STARD13;MSX2;PTCH1;WNT5A;LEF1;FMN1;AXIN2;RUNX2;BMP4;WNT6;SHH;GOLPH3;LMX1A;HNF4A;MSX1;FGFR1
CvsSt	Jensen_TISSUES	Neonate	15/87	0.00927705	0.20263	2.14745	10.0505	IL10;FOXE1;KCNJ11;PTH;SERPINC1;ABCA3;SLC4A1;TNF;RHD;IL1B;PAPPA;ALB;LCN2;B2M;TLR4
CvsSt	Jensen_TISSUES	Peripheral blood	16/96	0.0101718	0.209915	2.06182	9.4599	ACADVL;CCL22;IL18;CYBB;HLA-E;DPP4;FCGR3B;CD8B;GPNMB;APC;VNN2;ANPEP;TSPAN7;B2M;IDO1;CES1
CvsSt	Jensen_TISSUES	Dentin	13/72	0.010174	0.209915	2.27025	10.4157	SRGN;DLX3;AMBN;PLK2;OMD;MMP9;RUNX2;MMP20;COL1A1;BMP4;BMP1;MGP;NES
CvsSt	Jensen_TISSUES	Chondroblast	5/16	0.0104297	0.209915	4.67455	21.3304	NT5E;PTPRC;MSX2;SOX6;RUNX2
CvsSt	Jensen_TISSUES	Immature cell	5/16	0.0104297	0.209915	4.67455	21.3304	CD4;PTPRC;ANPEP;KIT;NES
CvsSt	Jensen_TISSUES	Nasal lavage fluid	6/22	0.0104536	0.209915	3.85763	17.5939	CCL11;SLPI;ALB;A2M;TNF;KNG1
CvsSt	Jensen_TISSUES	Neuroendocrine tumor cell line	3/6	0.0113863	0.220259	10.2769	45.9928	STC1;CCK;S100A3
CvsSt	Jensen_TISSUES	Osteocyte	9/43	0.0118889	0.220259	2.72496	12.0774	COL1A1;NT5E;GJA1;ALCAM;PTPRC;GALNT3;PTH;RUNX2;LRP6
CvsSt	Jensen_TISSUES	Yolk sac	9/43	0.0118889	0.220259	2.72496	12.0774	CDH5;TF;PTPRC;LMO2;KIT;ALB;KDR;GATA4;GATA2
CvsSt	Jensen_TISSUES	Neointima	11/58	0.0121195	0.220259	2.41031	10.6365	EGR1;PTPRC;VWF;NOS3;IL1B;KDR;AGTR1;CCL2;APOE;TNF;MMP9
CvsSt	Jensen_TISSUES	Nuchal ligament	4/11	0.0122892	0.220259	5.87456	25.8424	COL6A1;TMTC1;ADAMTS10;FBN1
CvsSt	Jensen_TISSUES	Skin epithelium	4/11	0.0122892	0.220259	5.87456	25.8424	WNT10B;MXD1;LGR6;FOXN1
CvsSt	Jensen_TISSUES	Endoderm	15/90	0.012578	0.220259	2.06122	9.01948	FOXF1;FOXH1;HNF1B;GATA4;NID1;FOXN1;BMP4;SHH;WNT11;HNF4A;ALB;KDR;NES;CER1;WNT3
CvsSt	Jensen_TISSUES	Submucosa	10/51	0.0130347	0.220259	2.51126	10.8992	SEMA5A;UCHL1;CD4;EDNRB;GAL;CMA1;KIT;TNF;KNG1;ELAVL3
CvsSt	Jensen_TISSUES	Bulb	6/23	0.0131022	0.220259	3.63051	15.7382	KRT71;KRTAP11-1;GJB1;KRT27;KRT15;TYR
CvsSt	Jensen_TISSUES	Gingival fluid	6/23	0.0131022	0.220259	3.63051	15.7382	IL10;IL1B;A2M;TNF;MMP9;CAMP
CvsSt	Jensen_TISSUES	Blastema	5/17	0.013714	0.220259	4.28477	18.3789	SHH;CITED1;SIX2;NCAM1;MSX1
CvsSt	Jensen_TISSUES	Bronchial epithelial cell line	5/17	0.013714	0.220259	4.28477	18.3789	CCL11;IL1B;ANKRD31;TNF;CFTR
CvsSt	Jensen_TISSUES	Jugular vein	5/17	0.013714	0.220259	4.28477	18.3789	PTH;SERPINC1;ALB;CCK;KNG1
CvsSt	Jensen_TISSUES	Saphenous vein	5/17	0.013714	0.220259	4.28477	18.3789	EDNRB;EDN3;NOS3;MMP9;KNG1
CvsSt	Jensen_TISSUES	Cerebrospinal fluid	9/44	0.0137994	0.220259	2.64696	11.3373	TF;SERPINC1;AHSG;SERPINF1;IGFBP2;APLP1;APOD;APOE;KNG1
CvsSt	Jensen_TISSUES	Rosette	9/44	0.0137994	0.220259	2.64696	11.3373	C3;CD2;CD4;FCGR3B;CD8B;ALB;NCAM1;B2M;NES
CvsSt	Jensen_TISSUES	Branchial arch	13/75	0.0141921	0.223661	2.16005	9.19114	DLX2;DLX3;MSX2;DLX4;LRRN2;SATB2;DLX6;BMP4;SHH;EDNRA;PLCB4;LRRN1;MSX1
CvsSt	Jensen_TISSUES	Amniotic fluid	10/52	0.0148898	0.231722	2.45133	10.3129	NT5E;IL1B;PAPPA;KIT;ALB;S100A12;A2M;TNF;B2M;RHD
CvsSt	Jensen_TISSUES	Trophoblast	23/161	0.0154774	0.237893	1.71953	7.16764	IL10;DLX3;NOS3;SLC1A5;GATA2;TNF;MMP9;HLA-E;HSD11B1;BMP4;GJA1;TF;MUC1;PAPPA;IL1B;ELF5;ADAM12;KDR;CRH;NCAM1;B2M;STOX1;HBEGF
CvsSt	Jensen_TISSUES	Tongue	55/463	0.0161818	0.245688	1.39551	5.75488	CRYBG3;SLC7A11;PCSK5;FADS2;CDH3;PNP;SCMH1;TGM3;TMPRSS11A;TNNC2;WNT5A;KRT78;EMP2;PGM2L1;FOXP2;CDC20B;EDAR;SLC7A8;SLPI;BBS12;RBP1;FETUB;VWA2;RHCG;ST6GALNAC3;S100A8;CAPS2;USP13;DLX2;SERPINB13;ALOX15;ASB15;KRT84;ASB16;GPC1;GPR155;SEMA4A;ZNF185;RNASE10;PDE2A;TNFRSF10A;PRSS36;FOSL2;TICRR;KITLG;CDK6;SUCLA2;NCEH1;FABP5;USH1G;PTK7;KRT15;ATP13A4;GJB7;ATP13A5
CvsSt	Jensen_TISSUES	BTO:0001439	8/38	0.0166946	0.248378	2.74419	11.2311	VWF;CHRNA4;PLA2G10;NAV1;ENPP3;KCNA7;KNG1;WDTC1
CvsSt	Jensen_TISSUES	Macrophage	7/31	0.0169295	0.248378	3.00075	12.2392	CCL22;TYROBP;ABCA6;IL1B;B2M;HBEGF;CES1
CvsSt	Jensen_TISSUES	Osteoblast	4/12	0.017157	0.248378	5.13995	20.8957	MSX2;OMD;ITGA7;RUNX2
CvsSt	Jensen_TISSUES	Venule	4/12	0.017157	0.248378	5.13995	20.8957	NOS3;IL1B;ALB;KNG1
CvsSt	Jensen_TISSUES	Feather bud	5/18	0.0176281	0.249397	3.95496	15.9712	EDAR;BMP4;WNT6;SHH;SLC24A5
CvsSt	Jensen_TISSUES	Peritoneal exudate	5/18	0.0176281	0.249397	3.95496	15.9712	IL10;CD4;IL1B;ALB;TNF
CvsSt	Jensen_TISSUES	Pulmonary artery	3/7	0.01862	0.254746	7.70728	30.7021	TSC22D3;NOX4;SMAD7
CvsSt	Jensen_TISSUES	RT-4 cell	3/7	0.01862	0.254746	7.70728	30.7021	UPK1B;UPK2;ELAVL3
CvsSt	Jensen_TISSUES	Sinus node	3/7	0.01862	0.254746	7.70728	30.7021	HCN3;USH1G;HCN2
CvsSt	Jensen_TISSUES	BTO:0000449	6/25	0.0197374	0.261416	3.24799	12.7492	FOXF1;FETUB;ATP13A2;CHD3;NKD1;NKD2
CvsSt	Jensen_TISSUES	Gastric adenocarcinoma cell	6/25	0.0197374	0.261416	3.24799	12.7492	GLP1R;LGALS4;GALNT6;ABHD2;EPHB2;HERC6
CvsSt	Jensen_TISSUES	B16-F10 cell	6/25	0.0197374	0.261416	3.24799	12.7492	PMEL;CD4;MLANA;TYRP1;TYR;MMP9
CvsSt	Jensen_TISSUES	Embryoid body	10/55	0.0216349	0.283532	2.28753	8.76912	BMP4;CDH5;SHH;PTPRC;KIT;KDR;TRIM36;GATA4;GATA2;NES
CvsSt	Jensen_TISSUES	Psmb	5/19	0.0222145	0.288094	3.67226	13.9803	KIFC1;C1GALT1;COL11A2;SERPINB7;HLA-E
CvsSt	Jensen_TISSUES	Corpus striatum	4/13	0.0230722	0.29015	4.5686	17.2196	CA4;DLGAP3;PTPN5;RGS9
CvsSt	Jensen_TISSUES	Inflorescence stalk	4/13	0.0230722	0.29015	4.5686	17.2196	MANBA;COL27A1;PLAGL2;PRR11
CvsSt	Jensen_TISSUES	oa1	4/13	0.0230722	0.29015	4.5686	17.2196	GPR143;SHROOM2;CACNA1F;XG
CvsSt	Jensen_TISSUES	Peripheral blood lymphocyte	6/26	0.0237827	0.290289	3.08542	11.5358	SLC7A5;APC;POU2AF1;TSPAN7;FAS;NRTN
CvsSt	Jensen_TISSUES	Fetal membrane	6/26	0.0237827	0.290289	3.08542	11.5358	HSD11B1;NT5E;PTPRC;IL1B;TNF;MMP9
CvsSt	Jensen_TISSUES	HaCaT cell	6/26	0.0237827	0.290289	3.08542	11.5358	FLG;CCL22;IL1B;TNF;MMP9;IVL
CvsSt	Jensen_TISSUES	Cranium	20/141	0.0244502	0.295539	1.704	6.32376	DLX2;DLX3;MSX2;PTH;DLX6;AMBN;PTCH1;SATB2;OMD;TNF;MMP9;RUNX2;KNG1;COL1A1;BMP4;SHH;IL1B;TFF3;MSX1;FGFR1
CvsSt	Jensen_TISSUES	Decidua	7/34	0.0274625	0.312361	2.6669	9.58732	HSD11B1;FCGR3B;IL15;PAPPA;NCAM1;CD69;HLA-E
CvsSt	Jensen_TISSUES	Epidermis	5/20	0.027509	0.312361	3.42725	12.315	LGALS7B;IL15;CORO2A;DSG4;PADI1
CvsSt	Jensen_TISSUES	Interdigit	3/8	0.0278491	0.312361	6.16548	22.0783	BMP4;MSX2;MSX1
CvsSt	Jensen_TISSUES	Larval integument	3/8	0.0278491	0.312361	6.16548	22.0783	PAH;XDH;MOCS1
CvsSt	Jensen_TISSUES	Leiomyosarcoma cell line	3/8	0.0278491	0.312361	6.16548	22.0783	ADORA1;ITGA7;KNG1
CvsSt	Jensen_TISSUES	MM-1 cell	3/8	0.0278491	0.312361	6.16548	22.0783	PLSCR1;TSC22D3;MT3
CvsSt	Jensen_TISSUES	Myelin	3/8	0.0278491	0.312361	6.16548	22.0783	GAL3ST1;PMP2;GDAP1
CvsSt	Jensen_TISSUES	Thymoma cell	3/8	0.0278491	0.312361	6.16548	22.0783	ENDOU;CD4;CD8B
CvsSt	Jensen_TISSUES	Sweat gland	6/27	0.0283473	0.315111	2.93834	10.47	EDAR;UCHL1;KRT15;AQP5;IVL;CFTR
CvsSt	Jensen_TISSUES	Myofibroblast	12/74	0.0291716	0.321404	1.99276	7.04352	ACTA2;COL1A1;GJA1;PTPRC;IL1B;KIT;CCL2;NOX4;TNF;MMP9;FBLN2;SMAD7
CvsSt	Jensen_TISSUES	Dental pulp	8/42	0.0294419	0.321537	2.42081	8.53419	COL1A1;BMP4;NT5E;ALCAM;OMD;MSX1;NES;RUNX2
CvsSt	Jensen_TISSUES	Small cell lung cancer cell	4/14	0.0300801	0.325649	4.11151	14.4063	SLC4A9;MYCN;SLCO5A1;SEZ6L
CvsSt	Jensen_TISSUES	Somite	10/58	0.0303621	0.325869	2.14421	7.49306	MESP2;BMP4;HES6;SHH;EN1;DMRT3;LRRN1;OTX1;MSX1;FGFR1
CvsSt	Jensen_TISSUES	DAUDI cell	6/28	0.0334529	0.350908	2.80462	9.52903	CD2;CD4;FCGR3B;NCAM1;B2M;IFNAR1
CvsSt	Jensen_TISSUES	Perichondrium	6/28	0.0334529	0.350908	2.80462	9.52903	BMP4;EMILIN3;MATN1;COL10A1;SOX6;RUNX2
CvsSt	Jensen_TISSUES	Visceral endoderm	5/21	0.0335406	0.350908	3.21287	10.9077	HNF4A;HESX1;HNF1B;OTX1;WNT3
CvsSt	Jensen_TISSUES	Tendon	16/111	0.0360592	0.374114	1.73483	5.76414	IL10;IL15;UBE2D1;TNF;MMP9;RUNX2;PTBP2;THBS4;COL1A1;CD4;PTPRC;IL1B;ALB;CCL2;PADI4;B2M
CvsSt	Jensen_TISSUES	Pulp	7/36	0.0365354	0.375922	2.4827	8.21643	DLX3;PTPRC;OMD;NES;KNG1;RUNX2;MMP20
CvsSt	Jensen_TISSUES	Aleurone layer	4/15	0.0382084	0.37753	3.73753	12.2019	WFDC12;WFDC5;NKD1;NKD2
CvsSt	Jensen_TISSUES	Superior vena cava	4/15	0.0382084	0.37753	3.73753	12.2019	SERPINC1;ALB;PLD5;DNAI1
CvsSt	Jensen_TISSUES	Capillary	15/103	0.038322	0.37753	1.75546	5.72584	FOXF1;SERPINC1;NOS3;AQP5;KRT75;MMP9;KNG1;TF;NPHS1;IL1B;ALB;AGTR1;CCL2;APOE;WDTC1
CvsSt	Jensen_TISSUES	Bone marrow stromal cell line	3/9	0.0390633	0.37753	5.13762	16.6591	KITLG;IL7;TICRR
CvsSt	Jensen_TISSUES	Breast invasive ductal carcinoma cell	3/9	0.0390633	0.37753	5.13762	16.6591	AEBP1;KRT72;CTHRC1
CvsSt	Jensen_TISSUES	Juxtaglomerular cell	3/9	0.0390633	0.37753	5.13762	16.6591	FLG;RBFOX3;IVL
CvsSt	Jensen_TISSUES	Mesenteric vein	3/9	0.0390633	0.37753	5.13762	16.6591	SERPINC1;ALB;KNG1
CvsSt	Jensen_TISSUES	Subcutaneous adipose tissue	6/29	0.0391175	0.37753	2.68254	8.69459	FNDC5;LIPE;FABP4;UBE2D1;AGPAT2;ACACA
CvsSt	Jensen_TISSUES	Palate	11/69	0.0399425	0.382526	1.952	6.28605	BMP4;SMCP;SHH;FOXE1;MSX2;CRISPLD2;SATB2;BPI;MSX1;WNT3;FGFR1
CvsSt	Jensen_TISSUES	Peripheral blood stem cell	5/22	0.0403309	0.383297	3.02372	9.70806	CD4;KITLG;PTPRC;NCAM1;MYOM2
CvsSt	Jensen_TISSUES	HUVEC cell	16/113	0.0415559	0.391948	1.69888	5.40364	ITGA4;VWF;NOS3;TNF;MMP9;KNG1;CDH5;PROCR;DDAH2;IL1B;ALB;KDR;NOX4;CCL2;APOE;TLR4
CvsSt	Jensen_TISSUES	Intervertebral disc	9/53	0.042277	0.395751	2.10449	6.65758	COL1A1;ADAMTS13;FOXF1;P4HA3;COL6A1;COL11A2;TMEM51;TNF;HSPG2
CvsSt	Jensen_TISSUES	Osteoclast	9/54	0.0468965	0.432091	2.05761	6.2959	VAV3;COL1A1;DOCK5;CA2;OAF;PTH;IL34;RUNX2;SLC9B2
CvsSt	Jensen_TISSUES	CEM cell	4/16	0.047468	0.432091	3.42588	10.4411	CD4;FAS;METTL9;SLC28A3
CvsSt	Jensen_TISSUES	Peritoneal mesothelium	4/16	0.047468	0.432091	3.42588	10.4411	IL1B;CCL2;TNF;SMAD7
CvsSt	Jensen_TISSUES	Tear	5/23	0.0478944	0.432091	2.85557	8.6774	FLG;SLPI;MSLN;B2M;LTF
CvsSt	Jensen_TISSUES	Spiral organ	5/23	0.0478944	0.432091	2.85557	8.6774	TECTB;KCNE1;CHRNA4;CLDN14;SYNE4
