# Supplementary material for: Altered hair root gene expression profiles highlight calcium signaling and lipid metabolism pathways to be associated with curly hair initiation and maintenance in Mangalitza pigs
Source: Front Genet. 2023 Jun 7;14:1184015. doi: 10.3389/fgene.2023.1184015 (PMC10282778; doi:10.3389/fgene.2023.1184015)
Supplement: Supplementary file 13 [file Table7.XLSX]

## Sheet: Sheet1
Table S7 Differentially expressed genes (DEGs) from SHvsP analysis. All significant DEGs (adjusted p-value <0.05, |log2(FC)| >2) are displayed.
Analysis	Ensembl ID	BaseMean	Log2FoldChange	lfcSE	Stat	p-value	padj	Target	Name	Description
SHvsP	ENSSSCG00000000774	16.1113	2.26327	0.400241	5.65477	1.56054e-08	5.05593e-07	396777	USP18	ubiquitin specific peptidase 18 [Source:NCBI gene (formerly Entrezgene);Acc:396777]
SHvsP	ENSSSCG00000001484	8.06097	2.32521	0.656741	3.54054	0.000399314	0.00264006	100153159	TINAG	tubulointerstitial nephritis antigen [Source:VGNC Symbol;Acc:VGNC:93998]
SHvsP	ENSSSCG00000001485	61.4463	2.55968	0.446501	5.73275	9.8814e-09	3.41405e-07	100623023	MLIP	muscular LMNA interacting protein [Source:VGNC Symbol;Acc:VGNC:90253]
SHvsP	ENSSSCG00000001616	2.24257	4.40372	1.61364	2.72906	0.00635145	0.0248704	100738047	TREML2	triggering receptor expressed on myeloid cells like 2 [Source:VGNC Symbol;Acc:VGNC:94386]
SHvsP	ENSSSCG00000001725	3.94666	4.76887	1.05919	4.50238	6.71967e-06	8.75817e-05	100152930	ADGRF5	adhesion G protein-coupled receptor F5 [Source:HGNC Symbol;Acc:HGNC:19030]
SHvsP	ENSSSCG00000001826	21.7539	2.03085	0.504769	4.02333	5.73816e-05	0.000526615	100155072	CFAP100	cilia and flagella associated protein 100 [Source:VGNC Symbol;Acc:VGNC:86593]
SHvsP	ENSSSCG00000001939	2.67145	2.60413	0.895041	2.90951	0.0036199	0.0158212	100625559	TTC6	tetratricopeptide repeat domain 6 [Source:VGNC Symbol;Acc:VGNC:94556]
SHvsP	ENSSSCG00000002129	4.66287	3.15957	0.713767	4.42661	9.57265e-06	0.000117058	100155563	RPGRIP1	RPGR interacting protein 1 [Source:VGNC Symbol;Acc:VGNC:92423]
SHvsP	ENSSSCG00000002373	3.73841	2.83193	0.708721	3.99584	6.4466e-05	0.000579939	100155976	PROX2	prospero homeobox 2 [Source:VGNC Symbol;Acc:VGNC:91838]
SHvsP	ENSSSCG00000002737	13.0773	3.36468	0.4664	7.21415	5.427e-13	6.63186e-11	106510480	CHST4	carbohydrate sulfotransferase 4 [Source:VGNC Symbol;Acc:VGNC:86680]
SHvsP	ENSSSCG00000002814	2.96791	2.59565	0.754444	3.44048	0.000580693	0.00355878	100514842	ADGRG3	adhesion G protein-coupled receptor G3 [Source:VGNC Symbol;Acc:VGNC:85131]
SHvsP	ENSSSCG00000003590	96.7541	2.17495	0.408565	5.3234	1.01845e-07	2.48245e-06	100515955	PTPRU	protein tyrosine phosphatase receptor type U [Source:VGNC Symbol;Acc:VGNC:91995]
SHvsP	ENSSSCG00000003608	1.71245	3.03359	1.22937	2.4676	0.0136022	0.0452527	100233188	LCK	LCK proto-onco, Src family tyrosine kinase [Source:VGNC Symbol;Acc:VGNC:89657]
SHvsP	ENSSSCG00000003640	80.812	2.67652	0.457399	5.85161	4.86826e-09	1.83143e-07	100511641	GRIK3	glutamate ionotropic receptor kainate type subunit 3 [Source:VGNC Symbol;Acc:VGNC:88679]
SHvsP	ENSSSCG00000003748	7.78969	3.79303	0.650545	5.83054	5.52474e-09	2.06136e-07	100521138	CELF4	CUGBP Elav-like family member 4 [Source:VGNC Symbol;Acc:VGNC:86539]
SHvsP	ENSSSCG00000003754	124.285	2.34956	0.43025	5.46091	4.73711e-08	1.29361e-06	100522145	ENSSSCG00000003754	cytochrome P450 family 4 subfamily A member 90 [Source:VGNC Symbol;Acc:VGNC:103358]
SHvsP	ENSSSCG00000003762	2.17986	3.02478	1.15833	2.61134	0.00901891	0.0327124	100525348	ADGRL4	adhesion G protein-coupled receptor L4 [Source:VGNC Symbol;Acc:VGNC:85138]
SHvsP	ENSSSCG00000004012	1650.47	2.08375	0.289732	7.19199	6.38535e-13	7.69964e-11	100153940	THBS2	thrombospondin 2 [Source:VGNC Symbol;Acc:VGNC:93947]
SHvsP	ENSSSCG00000004301	15.2561	2.82968	0.647435	4.37061	1.23902e-05	0.000145361	100517621	C6orf163	chromosome 1 C6orf163 homolog [Source:VGNC Symbol;Acc:VGNC:85968]
SHvsP	ENSSSCG00000004399	5.13379	2.10328	0.521926	4.02984	5.58143e-05	0.000514045	100525793	SLC22A16	solute carrier family 22 member 16 [Source:VGNC Symbol;Acc:VGNC:92976]
SHvsP	ENSSSCG00000004433	25.6632	2.26576	0.294546	7.69236	1.44441e-14	2.50474e-12	100155403	HS3ST5	heparan sulfate-glucosamine 3-sulfotransferase 5 [Source:VGNC Symbol;Acc:VGNC:88979]
SHvsP	ENSSSCG00000004503	2.99359	2.30741	0.805062	2.86613	0.00415525	0.0176525	100519879	LOXHD1	lipoxygenase homology domains 1 [Source:VGNC Symbol;Acc:VGNC:89779]
SHvsP	ENSSSCG00000004678	32.762	2.11919	0.287392	7.37386	1.65754e-13	2.32157e-11	397060	DUOX2	dual oxidase 2 [Source:VGNC Symbol;Acc:VGNC:103086]
SHvsP	ENSSSCG00000005081	4.90861	2.48123	0.715316	3.46872	0.000522936	0.00328659	100622535	LRRC9	leucine rich repeat containing 9 [Source:VGNC Symbol;Acc:VGNC:103120]
SHvsP	ENSSSCG00000005122	4.30094	2.9836	0.840049	3.55169	0.00038276	0.00254725	396729	TEK	TEK receptor tyrosine kinase [Source:VGNC Symbol;Acc:VGNC:93866]
SHvsP	ENSSSCG00000005167	6.3979	2.30675	0.639418	3.60757	0.000309073	0.0021349	100625506	SLC24A2	solute carrier family 24 member 2 [Source:VGNC Symbol;Acc:VGNC:92987]
SHvsP	ENSSSCG00000005369	3.50502	2.06428	0.682007	3.02677	0.00247183	0.0116418	100157892	FOXE1	forkhead box E1 [Source:VGNC Symbol;Acc:VGNC:88202]
SHvsP	ENSSSCG00000005457	78.2502	2.02677	0.316126	6.41127	1.44308e-10	8.53107e-09	100512581	LPAR1	lysophosphatidic acid receptor 1 [Source:VGNC Symbol;Acc:VGNC:103117]
SHvsP	ENSSSCG00000005494	205.153	2.0051	0.271178	7.39403	1.42444e-13	2.04222e-11	397460	TNC	tenascin C [Source:VGNC Symbol;Acc:VGNC:103192]
SHvsP	ENSSSCG00000005707	3.60562	3.46563	0.991088	3.49679	0.000470895	0.00302756	100523302	FIBCD1	fibrinogen C domain containing 1 [Source:VGNC Symbol;Acc:VGNC:88133]
SHvsP	ENSSSCG00000006696	7.80091	2.10349	0.419908	5.00941	5.45982e-07	1.05758e-05	100157795	GJA5	gap junction protein alpha 5 [Source:VGNC Symbol;Acc:VGNC:88460]
SHvsP	ENSSSCG00000006810	33.099	2.22441	0.33243	6.69136	2.21107e-11	1.71315e-09	100623937	KCNC4	potassium voltage-gated channel subfamily C member 4 [Source:VGNC Symbol;Acc:VGNC:89335]
SHvsP	ENSSSCG00000006846	2.33602	2.36307	0.794528	2.97419	0.00293768	0.0133523	100153448	HENMT1	HEN methyltransferase 1 [Source:VGNC Symbol;Acc:VGNC:88844]
SHvsP	ENSSSCG00000006912	152.753	2.07019	0.276103	7.49788	6.48571e-14	1.00933e-11	100156806	HFM1	helicase for meiosis 1 [Source:VGNC Symbol;Acc:VGNC:88867]
SHvsP	ENSSSCG00000007439	5.45661	2.02501	0.728047	2.78143	0.00541204	0.0218401	100153556	CDH22	cadherin 22 [Source:VGNC Symbol;Acc:VGNC:95579]
SHvsP	ENSSSCG00000007453	22.7774	2.59074	0.297655	8.70381	3.20916e-18	1.2985e-15	100624872	EYA2	EYA transcriptional coactivator and phosphatase 2 [Source:VGNC Symbol;Acc:VGNC:96292]
SHvsP	ENSSSCG00000007933	2.21257	2.59514	0.839808	3.09016	0.00200047	0.00979153	100624981	SEPTIN12	septin 12 [Source:NCBI gene (formerly Entrezgene);Acc:100624981]
SHvsP	ENSSSCG00000008115	111.483	2.70799	0.31719	8.53742	1.37249e-17	4.90004e-15	100521617	MAL	mal, T cell differentiation protein [Source:HGNC Symbol;Acc:HGNC:6817]
SHvsP	ENSSSCG00000008564	2.55111	2.1888	0.770392	2.84115	0.00449509	0.0187722	100737617	CIB4	calcium and integrin binding family member 4 [Source:VGNC Symbol;Acc:VGNC:86697]
SHvsP	ENSSSCG00000008634	881.256	2.03021	0.314853	6.44814	1.13235e-10	6.80454e-09	100512277	ATP6V1C2	ATPase H+ transporting V1 subunit C2 [Source:VGNC Symbol;Acc:VGNC:85673]
SHvsP	ENSSSCG00000008841	22.1809	2.42593	0.742166	3.26871	0.00108038	0.0059216	100627123	PDGFRA	platelet derived growth factor receptor alpha [Source:VGNC Symbol;Acc:VGNC:98179]
SHvsP	ENSSSCG00000008844	9.305	2.70737	0.606535	4.46366	8.05707e-06	0.000101314	397311	KDR	kinase insert domain receptor [Source:VGNC Symbol;Acc:VGNC:89418]
SHvsP	ENSSSCG00000008888	9.36378	2.11859	0.436681	4.85157	1.22487e-06	2.09405e-05	397547	NPY1R	neuropeptide Y receptor Y1 [Source:VGNC Symbol;Acc:VGNC:90865]
SHvsP	ENSSSCG00000008908	4.21086	4.028	0.90181	4.46658	7.94804e-06	0.00010029	100523453	PDCL2	phosducin like 2 [Source:VGNC Symbol;Acc:VGNC:91246]
SHvsP	ENSSSCG00000009051	1.92985	2.79792	0.996781	2.80695	0.00500125	0.0205189	397683	IL15	interleukin 15 [Source:VGNC Symbol;Acc:VGNC:89083]
SHvsP	ENSSSCG00000009301	1.15488	2.93555	1.14427	2.56543	0.0103048	0.036236	100736641	GPR12	G protein-coupled receptor 12 [Source:VGNC Symbol;Acc:VGNC:88598]
SHvsP	ENSSSCG00000009320	39.4504	2.37839	0.502226	4.73569	2.18307e-06	3.38293e-05	396763	FLT1	fms related receptor tyrosine kinase 1 [Source:VGNC Symbol;Acc:VGNC:88162]
SHvsP	ENSSSCG00000009649	3.08747	2.61283	0.944364	2.76677	0.00566155	0.022647	100521224	NEFL	neurofilament light [Source:VGNC Symbol;Acc:VGNC:90670]
SHvsP	ENSSSCG00000009745	15.4133	2.12794	0.380226	5.59652	2.18699e-08	6.78377e-07	100736874	ADGRD1	adhesion G protein-coupled receptor D1 [Source:HGNC Symbol;Acc:HGNC:19893]
SHvsP	ENSSSCG00000010036	481.185	2.22193	0.281886	7.88239	3.21168e-15	6.35634e-13	397113	SLC5A1	solute carrier family 5 member 1 [Source:VGNC Symbol;Acc:VGNC:93140]
SHvsP	ENSSSCG00000010336	5.34872	2.038	0.639868	3.18503	0.00144738	0.00748476	397503	SFTPA1	surfactant protein A1 [Source:NCBI gene (formerly Entrezgene);Acc:397503]
SHvsP	ENSSSCG00000010617	8.93531	2.41391	0.828327	2.9142	0.00356604	0.0156196	100511162	SORCS3	sortilin related VPS10 domain containing receptor 3 [Source:VGNC Symbol;Acc:VGNC:93341]
SHvsP	ENSSSCG00000010903	101.564	3.88787	0.350548	11.0908	1.38971e-28	8.4346e-25	397597	LHX9	LIM homeobox 9 [Source:VGNC Symbol;Acc:VGNC:95608]
SHvsP	ENSSSCG00000010959	18.5112	3.01311	0.519946	5.79505	6.83015e-09	2.46264e-07	100519209	NTRK2	neurotrophic receptor tyrosine kinase 2 [Source:VGNC Symbol;Acc:VGNC:96455]
SHvsP	ENSSSCG00000011724	1.59255	2.90084	1.00732	2.87977	0.0039797	0.017062
SHvsP	ENSSSCG00000011751	4.22562	2.05341	0.630162	3.25855	0.00111983	0.00609746	100519624	TMEM212	transmembrane protein 212 [Source:VGNC Symbol;Acc:VGNC:94138]
SHvsP	ENSSSCG00000011799	25.9755	2.41853	0.361517	6.68995	2.23254e-11	1.71519e-09	397585	AHSG	alpha 2-HS glycoprotein [Source:HGNC Symbol;Acc:HGNC:349]
SHvsP	ENSSSCG00000011800	160.244	2.05556	0.375352	5.47635	4.34199e-08	1.19424e-06	100517609	FETUB	fetuin B [Source:VGNC Symbol;Acc:VGNC:88091]
SHvsP	ENSSSCG00000012153	0.960395	2.63571	1.04125	2.53128	0.0113646	0.0392204	100154649	RAI2	retinoic acid induced 2 [Source:VGNC Symbol;Acc:VGNC:92069]
SHvsP	ENSSSCG00000012309	38.3374	2.03247	0.360777	5.63359	1.76494e-08	5.61819e-07	100513967	SHROOM4	shroom family member 4 [Source:VGNC Symbol;Acc:VGNC:92861]
SHvsP	ENSSSCG00000012384	4.71273	2.35656	0.826381	2.85167	0.00434907	0.0183009	100151799	AWAT2	acyl-CoA wax alcohol acyltransferase 2 [Source:VGNC Symbol;Acc:VGNC:85705]
SHvsP	ENSSSCG00000012773	8.05117	2.17653	0.528213	4.12055	3.77963e-05	0.000371596	100337678	PNCK	pregnancy up-regulated nonubiquitous CaM kinase [Source:VGNC Symbol;Acc:VGNC:91593]
SHvsP	ENSSSCG00000012915	5.63518	2.99656	0.601228	4.98408	6.22587e-07	1.18207e-05	100513263	ENSSSCG00000012915	cardiotrophin like cytokine factor 1 [Source:VGNC Symbol;Acc:VGNC:86725]
SHvsP	ENSSSCG00000013093	4.24494	2.03147	0.704335	2.88424	0.00392358	0.016889	100522060	VWCE	von Willebrand factor C and EGF domains [Source:VGNC Symbol;Acc:VGNC:94888]
SHvsP	ENSSSCG00000013095	1.463	2.80746	1.03894	2.70224	0.00688747	0.02645	396749	PAG6	pregnancy-associated glycoprotein 6 [Source:NCBI gene (formerly Entrezgene);Acc:396749]
SHvsP	ENSSSCG00000013173	7.29947	2.03409	0.495852	4.1022	4.09233e-05	0.000396769	100514032	ENSSSCG00000013173
SHvsP	ENSSSCG00000014007	5.93568	2.82058	1.05053	2.68491	0.00725494	0.0275662	100518179	FLT4	fms related receptor tyrosine kinase 4 [Source:VGNC Symbol;Acc:VGNC:88164]
SHvsP	ENSSSCG00000014039	37.4109	2.27403	0.38767	5.8659	4.46693e-09	1.68742e-07	100524790	RGS14	regulator of G protein signaling 14 [Source:VGNC Symbol;Acc:VGNC:92261]
SHvsP	ENSSSCG00000014259	19.265	2.22685	0.463938	4.79988	1.58763e-06	2.60428e-05	100518181	ADAMTS19	ADAM metallopeptidase with thrombospondin type 1 motif 19 [Source:VGNC Symbol;Acc:VGNC:96786]
SHvsP	ENSSSCG00000014418	6.70161	2.57076	0.779751	3.2969	0.000977581	0.00545337	100622368	STK32A	serine/threonine kinase 32A [Source:VGNC Symbol;Acc:VGNC:93552]
SHvsP	ENSSSCG00000014982	29.8463	2.48937	0.600318	4.14675	3.3723e-05	0.000339242	397411	MMP7	matrix metallopeptidase 7 [Source:VGNC Symbol;Acc:VGNC:90279]
SHvsP	ENSSSCG00000015137	6.89142	2.00177	0.549402	3.64354	0.000268913	0.00189929	100521388	CRTAM	cytotoxic and regulatory T cell molecule [Source:VGNC Symbol;Acc:VGNC:87005]
SHvsP	ENSSSCG00000015255	3.25698	2.91636	0.830107	3.51324	0.000442679	0.00288486	100626754	IGSF9B	immunoglobulin superfamily member 9B [Source:HGNC Symbol;Acc:HGNC:32326]
SHvsP	ENSSSCG00000015862	5.27131	2.70068	0.706014	3.82524	0.000130644	0.00103831	100517009	LIMS2	LIM zinc finger domain containing 2 [Source:VGNC Symbol;Acc:VGNC:95731]
SHvsP	ENSSSCG00000016131	2.7371	2.31197	0.858349	2.69351	0.00707038	0.0270173	100518044	ADAM23	ADAM metallopeptidase domain 23 [Source:VGNC Symbol;Acc:VGNC:95933]
SHvsP	ENSSSCG00000016258	23.5635	2.06949	0.404793	5.11247	3.17967e-07	6.6623e-06	100518938	DNER	delta/notch like EGF repeat containing [Source:VGNC Symbol;Acc:VGNC:96041]
SHvsP	ENSSSCG00000016548	6.23839	2.83195	0.831571	3.40554	0.000660342	0.00395053	100512201	ENSSSCG00000016548
SHvsP	ENSSSCG00000016703	89.3411	2.23167	0.319589	6.98292	2.89107e-12	2.80374e-10	100499568	HOXA5	homeobox A5 [Source:VGNC Symbol;Acc:VGNC:88939]
SHvsP	ENSSSCG00000017433	437.767	2.04353	0.719696	2.83944	0.00451926	0.0188601	100737030	ENSSSCG00000017433
SHvsP	ENSSSCG00000017583	5.19119	2.1154	0.710945	2.97548	0.00292534	0.0133062	100240723	SGCA	sarcoglycan alpha [Source:VGNC Symbol;Acc:VGNC:92788]
SHvsP	ENSSSCG00000021375	1.86776	2.74969	0.899322	3.05751	0.00223186	0.0107365	100153213	HS6ST2	heparan sulfate 6-O-sulfotransferase 2 [Source:HGNC Symbol;Acc:HGNC:19133]
SHvsP	ENSSSCG00000021540	3.45041	2.36745	0.658318	3.59621	0.000322891	0.00221689	100622378	C2CD4D	C2 calcium dependent domain containing 4D [Source:VGNC Symbol;Acc:VGNC:85994]
SHvsP	ENSSSCG00000021606	106.407	2.05866	0.227141	9.06337	1.26479e-19	7.42883e-17	100217391	FLVCR2	FLVCR heme transporter 2 [Source:VGNC Symbol;Acc:VGNC:96581]
SHvsP	ENSSSCG00000021656	24.0022	2.16311	0.359558	6.01602	1.78756e-09	7.7454e-08
SHvsP	ENSSSCG00000021675	2.64271	2.10878	0.721514	2.92272	0.00346986	0.0152902	100516420	ENSSSCG00000021675
SHvsP	ENSSSCG00000022384	4.1385	2.4084	0.730842	3.29537	0.000982926	0.0054748	102157658	ENSSSCG00000022384
SHvsP	ENSSSCG00000023451	35.3376	2.83518	0.478088	5.93024	3.02492e-09	1.22395e-07	100627197	KCNK2	potassium two pore domain channel subfamily K member 2 [Source:VGNC Symbol;Acc:VGNC:89369]
SHvsP	ENSSSCG00000023760	2.241	2.54602	0.994227	2.5608	0.0104431	0.0366537	100157365	CLEC14A	C-type lectin domain containing 14A [Source:VGNC Symbol;Acc:VGNC:86747]
SHvsP	ENSSSCG00000023909	9.07408	3.14087	0.727913	4.3149	1.59676e-05	0.000179912	100620258	THPO	thrombopoietin [Source:VGNC Symbol;Acc:VGNC:93962]
SHvsP	ENSSSCG00000024103	1.31846	2.66558	1.02791	2.5932	0.00950882	0.0340351	100620837	ENSSSCG00000024103
SHvsP	ENSSSCG00000024268	5.67194	2.06535	0.486867	4.24213	2.21404e-05	0.000235733
SHvsP	ENSSSCG00000024610	64.8665	2.02426	0.498472	4.06094	4.88764e-05	0.00046111	100157675	KRT4	keratin 4 [Source:VGNC Symbol;Acc:VGNC:89591]
SHvsP	ENSSSCG00000025013	104.782	2.31465	0.455219	5.08471	3.68191e-07	7.60093e-06	100152394	RTN1	reticulon 1 [Source:VGNC Symbol;Acc:VGNC:103169]
SHvsP	ENSSSCG00000025270	11.8822	2.89765	0.694117	4.17459	2.98523e-05	0.000306796	100620350	CHRD	chordin [Source:VGNC Symbol;Acc:VGNC:86661]
SHvsP	ENSSSCG00000026486	35.461	2.51814	0.798088	3.15522	0.00160376	0.00814541	100627175	ENSSSCG00000026486
SHvsP	ENSSSCG00000026754	4.18885	2.15023	0.643068	3.34371	0.000826663	0.00474524	100626830	ATCAY	ATCAY kinesin light chain interacting caytaxin [Source:VGNC Symbol;Acc:VGNC:85603]
SHvsP	ENSSSCG00000026780	47.7538	2.39967	0.351388	6.82912	8.54397e-12	7.26956e-10	100516065	EDIL3	EGF like repeats and discoidin domains 3 [Source:VGNC Symbol;Acc:VGNC:99642]
SHvsP	ENSSSCG00000027678	2.33727	2.79794	1.14979	2.43343	0.0149567	0.0485811	100622158	CCDC175	coiled-coil domain containing 175 [Source:VGNC Symbol;Acc:VGNC:86274]
SHvsP	ENSSSCG00000027954	2.32574	3.96749	0.944216	4.20189	2.64699e-05	0.000275723	100523263	NMU	neuromedin U [Source:VGNC Symbol;Acc:VGNC:90803]
SHvsP	ENSSSCG00000028204	5.52742	2.02737	0.541828	3.74172	0.000182766	0.00137386	100623094	TREH	trehalase [Source:VGNC Symbol;Acc:VGNC:94382]
SHvsP	ENSSSCG00000028997	2.55525	3.68977	0.928658	3.97323	7.09034e-05	0.000628534	100519066	ENSSSCG00000028997
SHvsP	ENSSSCG00000031813	3.50797	2.28172	0.784544	2.90833	0.0036336	0.0158658	100621597	XKR4	XK related 4 [Source:VGNC Symbol;Acc:VGNC:98900]
SHvsP	ENSSSCG00000032503	1.9569	2.08972	0.856576	2.43962	0.0147028	0.0479421
SHvsP	ENSSSCG00000033382	4.77139	2.78787	0.709389	3.92995	8.49633e-05	0.000728005	110259210	ENSSSCG00000033382	mucin 5AC, oligomeric mucus/gel-forming [Source:VGNC Symbol;Acc:VGNC:90483]
SHvsP	ENSSSCG00000033544	6.13764	2.56777	0.773213	3.32091	0.000897235	0.00507671	100144493	NTF3	neurotrophin 3 [Source:VGNC Symbol;Acc:VGNC:90928]
SHvsP	ENSSSCG00000033641	43.7294	2.20207	0.367626	5.98996	2.09889e-09	8.88757e-08	100525585	COL8A2	collagen type VIII alpha 2 chain [Source:VGNC Symbol;Acc:VGNC:86881]
SHvsP	ENSSSCG00000034000	782.708	2.28337	0.410063	5.56835	2.57162e-08	7.73631e-07	100153783	ENSSSCG00000034000
SHvsP	ENSSSCG00000034015	1.31456	2.55714	1.00289	2.54977	0.0107795	0.0375569	100134978	XIRP1	xin actin binding repeat containing 1 [Source:NCBI gene (formerly Entrezgene);Acc:100134978]
SHvsP	ENSSSCG00000034253	2.99166	2.15644	0.742788	2.90317	0.00369406	0.0160797
SHvsP	ENSSSCG00000034619	1.74782	2.08553	0.861215	2.42161	0.0154519	0.0498315	110258919	ENSSSCG00000034619
SHvsP	ENSSSCG00000034623	3.72505	2.22431	0.723298	3.07523	0.0021034	0.0102102	100049687	ENSSSCG00000034623
SHvsP	ENSSSCG00000034812	1.41556	2.27114	0.929718	2.44283	0.0145725	0.0476282	102162017	EFCAB8	EF-hand calcium binding domain 8 [Source:HGNC Symbol;Acc:HGNC:34532]
SHvsP	ENSSSCG00000035071	8.97299	2.12538	0.573184	3.70803	0.000208876	0.00153727	100622304	DCST1	DC-STAMP domain containing 1 [Source:VGNC Symbol;Acc:VGNC:87190]
SHvsP	ENSSSCG00000035269	1.23798	2.55762	1.03206	2.47817	0.0132056	0.0442652	100739001	NXNL2	nucleoredoxin like 2 [Source:VGNC Symbol;Acc:VGNC:90996]
SHvsP	ENSSSCG00000035689	55.8648	2.62269	0.372259	7.04533	1.85022e-12	1.92507e-10	100738677	NEXMIF	neurite extension and migration factor [Source:VGNC Symbol;Acc:VGNC:90703]
SHvsP	ENSSSCG00000035772	3.21426	2.68028	0.926634	2.89249	0.00382203	0.0165261	414737	CDH5	cadherin 5 [Source:VGNC Symbol;Acc:VGNC:86486]
SHvsP	ENSSSCG00000036155	15.957	2.39811	0.415626	5.76987	7.93323e-09	2.81028e-07	100622618	ENSSSCG00000036155
SHvsP	ENSSSCG00000036177	44.8993	2.23856	0.446312	5.01569	5.28431e-07	1.02467e-05	100521553	ENSSSCG00000036177	tetraspanin 8 [Source:VGNC Symbol;Acc:VGNC:94515]
SHvsP	ENSSSCG00000036227	101.3	2.1156	0.227274	9.30858	1.29547e-20	9.82833e-18
SHvsP	ENSSSCG00000036364	2.8739	2.18375	0.842868	2.59086	0.00957367	0.0342259	100516906	EGR4	early growth response 4 [Source:VGNC Symbol;Acc:VGNC:87592]
SHvsP	ENSSSCG00000036647	1.96671	2.83645	0.960832	2.95208	0.00315643	0.0141244	110257779	SPIN4	spindlin family member 4 [Source:VGNC Symbol;Acc:VGNC:93408]
SHvsP	ENSSSCG00000037025	4.95866	3.0394	0.882045	3.44585	0.000569259	0.00350764	110259322	PLVAP	plasmalemma vesicle associated protein [Source:VGNC Symbol;Acc:VGNC:91577]
SHvsP	ENSSSCG00000037156	38.3478	2.05513	0.383776	5.35503	8.55439e-08	2.1366e-06	102163140	RBPJL	recombination signal binding protein for immunoglobulin kappa J region like [Source:HGNC Symbol;Acc:HGNC:13761]
SHvsP	ENSSSCG00000037598	26.1343	2.08207	0.406185	5.12591	2.96097e-07	6.29094e-06	100520876	SNX10	sorting nexin 10 [Source:VGNC Symbol;Acc:VGNC:93303]
SHvsP	ENSSSCG00000037862	1.70373	2.56173	1.04107	2.46066	0.013868	0.0459488
SHvsP	ENSSSCG00000037935	1.43886	3.27597	1.09971	2.97893	0.00289254	0.0131866	100154451	CYYR1	cysteine and tyrosine rich 1 [Source:VGNC Symbol;Acc:VGNC:87139]
SHvsP	ENSSSCG00000038080	3.33981	3.14343	0.896624	3.50585	0.000455145	0.00294711	100628129	EMCN	endomucin [Source:VGNC Symbol;Acc:VGNC:87674]
SHvsP	ENSSSCG00000038228	13.5439	2.2207	0.422421	5.25707	1.46371e-07	3.45223e-06	102166005	ENSSSCG00000038228
SHvsP	ENSSSCG00000038264	4.28374	2.34056	0.696593	3.36	0.000779411	0.0045081	110261361	ENSSSCG00000038264
SHvsP	ENSSSCG00000038460	6.78572	2.14895	0.49908	4.30583	1.66364e-05	0.000185497	106510450	FOXF1	forkhead box F1 [Source:VGNC Symbol;Acc:VGNC:88204]
SHvsP	ENSSSCG00000038924	1.92555	2.27149	0.89935	2.5257	0.0115468	0.0396988
SHvsP	ENSSSCG00000039041	4.8538	2.04199	0.590768	3.4565	0.000547236	0.00340535	100623053	ZNF467	zinc finger protein 467 [Source:HGNC Symbol;Acc:HGNC:23154]
SHvsP	ENSSSCG00000039358	109.533	2.5487	0.25015	10.1887	2.22761e-24	3.12003e-21	110256562	SUSD5	sushi domain containing 5 [Source:VGNC Symbol;Acc:VGNC:93635]
SHvsP	ENSSSCG00000039673	5.5507	2.3512	0.535375	4.39168	1.12476e-05	0.000133767	100514598	ASB16	ankyrin repeat and SOCS box containing 16 [Source:VGNC Symbol;Acc:VGNC:98974]
SHvsP	ENSSSCG00000039723	10.2223	2.07398	0.442403	4.68799	2.75898e-06	4.11092e-05
SHvsP	ENSSSCG00000039821	15.0594	2.61899	0.719715	3.63892	0.000273784	0.00192995
SHvsP	ENSSSCG00000040411	30.9538	2.16222	0.262262	8.24452	1.65821e-16	4.64502e-14	100515590	CCDC69	coiled-coil domain containing 69 [Source:VGNC Symbol;Acc:VGNC:86309]
SHvsP	ENSSSCG00000040650	5.62938	2.72158	0.558036	4.87706	1.07677e-06	1.87616e-05	102159212	ENSSSCG00000040650
SHvsP	ENSSSCG00000040822	21.5781	3.53527	0.558352	6.33162	2.42601e-10	1.35085e-08	100153016	RERGL	RERG like [Source:VGNC Symbol;Acc:VGNC:92218]
SHvsP	ENSSSCG00000041016	2.03613	2.04695	0.844184	2.42477	0.0153181	0.0495141
SHvsP	ENSSSCG00000041066	3.77419	2.30593	0.680471	3.38872	0.000702196	0.00414041
SHvsP	ENSSSCG00000041353	2.28672	3.0203	1.06978	2.82328	0.00475347	0.0196663
SHvsP	ENSSSCG00000041532	6.06014	2.44747	0.648511	3.77398	0.000160662	0.0012385
SHvsP	ENSSSCG00000041798	4.70159	2.05979	0.568253	3.62478	0.000289207	0.0020199
SHvsP	ENSSSCG00000041926	1.35412	2.6991	1.00539	2.68463	0.00726096	0.0275662
SHvsP	ENSSSCG00000041993	2.04053	2.43431	0.945412	2.57487	0.0100278	0.035502
SHvsP	ENSSSCG00000042020	1.22518	2.44143	0.964634	2.53094	0.0113758	0.0392441
SHvsP	ENSSSCG00000042227	1.20179	2.98235	1.00289	2.97375	0.0029418	0.013361
SHvsP	ENSSSCG00000042352	2.49777	3.57426	1.27359	2.80646	0.00500897	0.0205459
SHvsP	ENSSSCG00000042587	2.26321	2.06289	0.838412	2.46047	0.0138755	0.0459521
SHvsP	ENSSSCG00000042617	2.11111	2.15448	0.792215	2.71956	0.00653688	0.0253836
SHvsP	ENSSSCG00000043143	1.38104	2.65402	1.00904	2.63023	0.00853259	0.0313355
SHvsP	ENSSSCG00000043301	7.66083	2.36743	0.511299	4.63023	3.65253e-06	5.19167e-05	100153724	IFN-ALPHA-8	interferon-alpha-8 [Source:NCBI gene (formerly Entrezgene);Acc:100153724]
SHvsP	ENSSSCG00000044366	1.43683	2.37833	0.974441	2.44072	0.0146581	0.0478305
SHvsP	ENSSSCG00000044427	1.46761	2.83762	1.00117	2.83432	0.0045924	0.0190997
SHvsP	ENSSSCG00000044652	5.16252	2.64051	0.814661	3.24123	0.00119013	0.00640207
SHvsP	ENSSSCG00000044923	2.67903	2.45265	0.822142	2.98324	0.00285215	0.0130482	110259258	ENSSSCG00000044923
SHvsP	ENSSSCG00000045003	3.55149	2.21543	0.668331	3.31487	0.00091687	0.00516854
SHvsP	ENSSSCG00000045498	7.07942	2.2436	0.495532	4.52766	5.96409e-06	7.92658e-05
SHvsP	ENSSSCG00000045673	7.62642	2.49553	0.610078	4.09052	4.30412e-05	0.000414785	100622765	ENSSSCG00000045673
SHvsP	ENSSSCG00000045787	1.23495	3.00678	0.997635	3.01391	0.00257903	0.0120408
SHvsP	ENSSSCG00000046319	58.8031	2.14546	0.362569	5.91739	3.27083e-09	1.30604e-07	100737172	ENSSSCG00000046319
SHvsP	ENSSSCG00000046323	2.30191	2.26339	0.930601	2.43218	0.0150083	0.0487247
SHvsP	ENSSSCG00000046418	6.35721	2.09213	0.535235	3.90882	9.275e-05	0.000785434
SHvsP	ENSSSCG00000046459	1.88295	2.25137	0.8963	2.51185	0.0120099	0.0409968
SHvsP	ENSSSCG00000046683	1.47685	2.72528	1.08335	2.51561	0.0118827	0.0406767
SHvsP	ENSSSCG00000046848	2.02694	2.81046	1.08408	2.59249	0.00952851	0.0340983
SHvsP	ENSSSCG00000046920	2.92813	3.49628	0.885256	3.94946	7.83284e-05	0.00068109
SHvsP	ENSSSCG00000046999	1.73069	2.12405	0.87654	2.42322	0.0153837	0.0496739
SHvsP	ENSSSCG00000047456	7.38176	2.88391	0.632929	4.55645	5.20243e-06	7.07398e-05
SHvsP	ENSSSCG00000047465	2.9737	2.0716	0.766029	2.70434	0.00684411	0.0263486	106507011	SERTM2	serine rich and transmembrane domain containing 2 [Source:NCBI gene (formerly Entrezgene);Acc:106507011]
SHvsP	ENSSSCG00000048159	19.1061	2.98789	1.02578	2.91279	0.00358219	0.015679	106510141	ENSSSCG00000048159
SHvsP	ENSSSCG00000048223	2.19416	2.31403	0.828418	2.79331	0.00521718	0.021171
SHvsP	ENSSSCG00000048235	1.17178	2.97512	1.07169	2.7761	0.00550154	0.0221326	100737419	ENSSSCG00000048235
SHvsP	ENSSSCG00000048255	2.73953	2.60591	0.765207	3.40549	0.000660447	0.00395053
SHvsP	ENSSSCG00000048324	9.37816	2.05975	0.426421	4.83033	1.36308e-06	2.28325e-05
SHvsP	ENSSSCG00000048349	5.62859	2.19665	0.51289	4.28288	1.8449e-05	0.000202045
SHvsP	ENSSSCG00000048443	2.61564	2.40876	0.834872	2.88519	0.00391179	0.0168462	100625006	APLN	apelin [Source:HGNC Symbol;Acc:HGNC:16665]
SHvsP	ENSSSCG00000048476	2.89671	2.83519	0.870069	3.25858	0.0011197	0.00609746
SHvsP	ENSSSCG00000049378	1.43084	2.64422	1.0565	2.50282	0.012321	0.0418858
SHvsP	ENSSSCG00000049476	3.03824	2.02998	0.665616	3.04977	0.00229015	0.0109562
SHvsP	ENSSSCG00000049501	3.43331	2.23665	0.65809	3.39869	0.000677084	0.00402361
SHvsP	ENSSSCG00000049805	2.44789	2.14891	0.829818	2.58962	0.00960811	0.0343163
SHvsP	ENSSSCG00000050433	1.41604	2.70521	1.0206	2.65062	0.00803454	0.0298801
SHvsP	ENSSSCG00000050584	2.49541	3.65479	0.903531	4.045	5.23222e-05	0.000486523
SHvsP	ENSSSCG00000051063	0.995462	2.74116	1.02102	2.68473	0.00725894	0.0275662
SHvsP	ENSSSCG00000051246	3.61523	2.20892	0.641326	3.4443	0.000572536	0.00352492
SHvsP	ENSSSCG00000051258	3.33256	2.12164	0.649864	3.26475	0.0010956	0.00598701
SHvsP	ENSSSCG00000051272	3.37894	4.55992	1.06502	4.28152	1.85618e-05	0.000202865
SHvsP	ENSSSCG00000051284	3.80923	2.07259	0.726394	2.85325	0.00432745	0.0182305
SHvsP	ENSSSCG00000051631	7.6146	2.36754	0.544248	4.35011	1.3607e-05	0.000157106
SHvsP	ENSSSCG00000051637	48.6278	2.64851	0.306772	8.63348	5.95146e-18	2.30562e-15
SHvsP	ENSSSCG00000051701	7.46917	3.22691	0.589116	5.47755	4.3126e-08	1.18795e-06
SHvsP	ENSSSCG00000051780	1.1352	2.90101	1.19628	2.42502	0.0153075	0.0494973
SHvsP	ENSSSCG00000000289	2.9843	-3.92007	1.17079	-3.34822	0.000813334	0.004682	100157948	ENSSSCG00000000289	nuclear factor, erythroid 2 [Source:VGNC Symbol;Acc:VGNC:90712]
SHvsP	ENSSSCG00000000590	3.66094	-2.12155	0.710755	-2.98492	0.00283652	0.0129898	397632	PLCZ1	phospholipase C zeta 1 [Source:VGNC Symbol;Acc:VGNC:103310]
SHvsP	ENSSSCG00000000795	8.10654	-2.01453	0.57652	-3.49429	0.00047532	0.00304955	100049661	ADAMTS20	ADAM metallopeptidase with thrombospondin type 1 motif 20 [Source:VGNC Symbol;Acc:VGNC:85082]
SHvsP	ENSSSCG00000000932	4.11343	-2.27102	0.783537	-2.89842	0.00375049	0.0162903	100739079	NTS	neurotensin [Source:VGNC Symbol;Acc:VGNC:90938]
SHvsP	ENSSSCG00000000991	44.528	-3.35227	0.429295	-7.80877	5.77476e-15	1.07293e-12	100152843	FOXQ1	forkhead box Q1 [Source:VGNC Symbol;Acc:VGNC:88225]
SHvsP	ENSSSCG00000001101	10.8463	-4.4986	0.819048	-5.49248	3.96335e-08	1.10431e-06	768111	SCGN	secretagogin, EF-hand calcium binding protein [Source:VGNC Symbol;Acc:VGNC:92624]
SHvsP	ENSSSCG00000001729	7.48271	-4.52278	0.811177	-5.57558	2.46701e-08	7.49905e-07	100626713	PTCHD4	patched domain containing 4 [Source:VGNC Symbol;Acc:VGNC:91943]
SHvsP	ENSSSCG00000001909	159.9	-6.51308	0.635867	-10.2428	1.27458e-24	2.10977e-21	100153335	STRA6	signaling receptor and transporter of retinol STRA6 [Source:VGNC Symbol;Acc:VGNC:93573]
SHvsP	ENSSSCG00000001910	2.05283	-2.9053	0.983962	-2.95265	0.00315056	0.0141051	100152082	ISLR	immunoglobulin superfamily containing leucine rich repeat [Source:VGNC Symbol;Acc:VGNC:98052]
SHvsP	ENSSSCG00000002038	2.24916	-2.70972	1.00266	-2.70253	0.00688134	0.0264448	100153926	PSMB11	proteasome subunit beta 11 [Source:VGNC Symbol;Acc:VGNC:91904]
SHvsP	ENSSSCG00000002481	5.19078	-4.11079	1.11135	-3.69894	0.000216506	0.00157864	100153513	SERPINA5	serpin family A member 5 [Source:VGNC Symbol;Acc:VGNC:92734]
SHvsP	ENSSSCG00000002821	2.68668	-4.63306	1.17588	-3.94007	8.14582e-05	0.000703601	100516016	CCL22	C-C motif chemokine ligand 22 [Source:VGNC Symbol;Acc:VGNC:86339]
SHvsP	ENSSSCG00000003018	173.612	-3.54801	0.393343	-9.02013	1.87866e-19	1.06896e-16	397583	LIPE	lipase E, hormone sensitive type [Source:VGNC Symbol;Acc:VGNC:98493]
SHvsP	ENSSSCG00000003140	510.57	-2.36564	0.37879	-6.24525	4.2312e-10	2.21384e-08	100302504	FGF21	fibroblast growth factor 21 [Source:VGNC Symbol;Acc:VGNC:88109]
SHvsP	ENSSSCG00000003483	636.722	-2.58396	0.326371	-7.91724	2.42832e-15	5.14127e-13	100524749	PADI4	peptidyl arginine deiminase 4 [Source:VGNC Symbol;Acc:VGNC:98175]
SHvsP	ENSSSCG00000003622	7.37668	-2.74452	0.55948	-4.90549	9.31967e-07	1.66365e-05
SHvsP	ENSSSCG00000003694	56.0612	-2.12825	0.381094	-5.58458	2.34267e-08	7.16897e-07	100522875	EMILIN2	elastin microfibril interfacer 2 [Source:VGNC Symbol;Acc:VGNC:87681]
SHvsP	ENSSSCG00000003805	28.5791	-2.05189	0.425052	-4.82739	1.38335e-06	2.31083e-05	100037941	PDE4B	phosphodiesterase 4B [Source:VGNC Symbol;Acc:VGNC:91255]
SHvsP	ENSSSCG00000003821	46.0152	-2.09774	0.413478	-5.07339	3.90785e-07	7.97692e-06	100523255	KANK4	KN motif and ankyrin repeat domains 4 [Source:VGNC Symbol;Acc:VGNC:89298]
SHvsP	ENSSSCG00000004614	449.404	-5.08677	0.778412	-6.5348	6.36944e-11	4.26378e-09	100516123	UNC13C	unc-13 homolog C [Source:VGNC Symbol;Acc:VGNC:94702]
SHvsP	ENSSSCG00000004663	140.053	-3.1714	0.415755	-7.62804	2.38341e-14	3.90965e-12	100511850	SEMA6D	semaphorin 6D [Source:VGNC Symbol;Acc:VGNC:92711]
SHvsP	ENSSSCG00000005177	29.0681	-2.49976	0.450899	-5.54395	2.95725e-08	8.61529e-07	100155580	SH3GL2	SH3 domain containing GRB2 like 2, endophilin A1 [Source:VGNC Symbol;Acc:VGNC:92824]
SHvsP	ENSSSCG00000005762	4.88482	-2.73796	0.694079	-3.94474	7.98875e-05	0.000692663	100519817	KCNT1	potassium sodium-activated channel subfamily T member 1 [Source:VGNC Symbol;Acc:VGNC:89388]
SHvsP	ENSSSCG00000006183	277.347	-3.42939	0.423827	-8.09148	5.8944e-16	1.47021e-13	100517890	SBSPON	somatomedin B and thrombospondin type 1 domain containing [Source:VGNC Symbol;Acc:VGNC:92599]
SHvsP	ENSSSCG00000006243	55.5782	-2.90378	0.480957	-6.03751	1.56507e-09	6.8833e-08	100152093	PENK	proenkephalin [Source:VGNC Symbol;Acc:VGNC:91312]
SHvsP	ENSSSCG00000006250	5.5903	-2.06797	0.687667	-3.00722	0.0026365	0.01224	100152890	LYN	LYN proto-onco, Src family tyrosine kinase [Source:VGNC Symbol;Acc:VGNC:89910]
SHvsP	ENSSSCG00000006588	127.128	-4.51151	0.413896	-10.9001	1.15122e-27	3.49358e-24	100127489	ENSSSCG00000006588	S100 calcium binding protein A9 [Source:VGNC Symbol;Acc:VGNC:92547]
SHvsP	ENSSSCG00000006590	139.698	-4.23643	0.494109	-8.57388	1.00059e-17	3.71809e-15	100127488	S100A8	S100 calcium binding protein A8 [Source:VGNC Symbol;Acc:VGNC:92546]
SHvsP	ENSSSCG00000006758	109.84	-4.9535	0.490127	-10.1066	5.16717e-24	6.27225e-21	100152816	SYT6	synaptotagmin 6 [Source:VGNC Symbol;Acc:VGNC:93687]
SHvsP	ENSSSCG00000006774	13.2227	-3.14339	0.56655	-5.54831	2.88447e-08	8.4574e-07	102162031	PPM1J	protein phosphatase, Mg2+/Mn2+ dependent 1J [Source:VGNC Symbol;Acc:VGNC:91709]
SHvsP	ENSSSCG00000006917	50.9099	-2.14245	0.37183	-5.76191	8.31684e-09	2.93475e-07	100156403	LRRC8C	leucine rich repeat containing 8 VRAC subunit C [Source:VGNC Symbol;Acc:VGNC:98087]
SHvsP	ENSSSCG00000006969	49.7033	-2.30216	0.368598	-6.24573	4.21832e-10	2.21346e-08	100525134	TRMT9B	tRNA methyltransferase 9B (putative) [Source:HGNC Symbol;Acc:HGNC:26725]
SHvsP	ENSSSCG00000007063	16.7873	-2.40285	0.606867	-3.95943	7.51284e-05	0.000659247	100517504	ANKEF1	ankyrin repeat and EF-hand domain containing 1 [Source:VGNC Symbol;Acc:VGNC:95662]
SHvsP	ENSSSCG00000007112	69.0627	-7.16826	0.853052	-8.40307	4.34943e-17	1.4399e-14	100739820	PAX1	paired box 1 [Source:VGNC Symbol;Acc:VGNC:96467]
SHvsP	ENSSSCG00000007369	0.880401	-3.48356	1.20297	-2.8958	0.00378196	0.0163918	100155350	ENSSSCG00000007369
SHvsP	ENSSSCG00000007603	26.8207	-2.38798	0.717	-3.33052	0.000866841	0.00493541	100521613	NPTX2	neuronal pentraxin 2 [Source:VGNC Symbol;Acc:VGNC:90863]
SHvsP	ENSSSCG00000008073	23.1909	-2.09705	0.313295	-6.69352	2.17865e-11	1.69525e-09	100511925	OMD	osteomodulin [Source:VGNC Symbol;Acc:VGNC:91040]
SHvsP	ENSSSCG00000008624	362.248	-2.4161	0.332657	-7.26304	3.78494e-13	4.85325e-11	100170845	LPIN1	lipin 1 [Source:VGNC Symbol;Acc:VGNC:89793]
SHvsP	ENSSSCG00000008625	1.71485	-2.963	1.11223	-2.66403	0.00772111	0.0289748	100620275	NTSR2	neurotensin receptor 2 [Source:VGNC Symbol;Acc:VGNC:90939]
SHvsP	ENSSSCG00000008648	8.04735	-3.35808	0.765994	-4.38395	1.16544e-05	0.000138153	396752	RSAD2	radical S-adenosyl methionine domain containing 2 [Source:VGNC Symbol;Acc:VGNC:92472]
SHvsP	ENSSSCG00000008823	25.4729	-4.27669	0.525835	-8.13313	4.18355e-16	1.05797e-13	100520624	SLC10A4	solute carrier family 10 member 4 [Source:VGNC Symbol;Acc:VGNC:92917]
SHvsP	ENSSSCG00000008824	0.943748	-3.64422	1.26596	-2.87863	0.00399401	0.0171073	574050	ZAR1	zygote arrest 1 [Source:VGNC Symbol;Acc:VGNC:95051]
SHvsP	ENSSSCG00000008889	4.16765	-4.42484	1.05172	-4.20723	2.58518e-05	0.000270203	100517770	NPY5R	neuropeptide Y receptor Y5 [Source:VGNC Symbol;Acc:VGNC:90866]
SHvsP	ENSSSCG00000008930	177.267	-3.08724	0.650513	-4.74586	2.07625e-06	3.25339e-05	100513296	TMPRSS11F	transmembrane serine protease 11F [Source:HGNC Symbol;Acc:HGNC:29994]
SHvsP	ENSSSCG00000008932	11.0351	-6.29891	1.43676	-4.38412	1.16455e-05	0.000138138	100513484	TMPRSS11B	transmembrane serine protease 11B [Source:HGNC Symbol;Acc:HGNC:25398]
SHvsP	ENSSSCG00000008944	3.90253	-3.27392	0.765131	-4.27889	1.87824e-05	0.000205153	100524634	NPFFR2	neuropeptide FF receptor 2 [Source:VGNC Symbol;Acc:VGNC:90847]
SHvsP	ENSSSCG00000008953	4.02922	-3.05417	0.878657	-3.47595	0.00050904	0.00322611	396880	CXCL8	C-X-C motif chemokine ligand 8 [Source:VGNC Symbol;Acc:VGNC:87106]
SHvsP	ENSSSCG00000008972	19.629	-2.15565	0.440827	-4.89002	1.00824e-06	1.77201e-05	100511942	PPEF2	protein phosphatase with EF-hand domain 2 [Source:VGNC Symbol;Acc:VGNC:91690]
SHvsP	ENSSSCG00000008984	310.796	-2.74395	0.340205	-8.06557	7.28922e-16	1.75034e-13
SHvsP	ENSSSCG00000009004	1.08603	-3.32297	1.10604	-3.00437	0.00266129	0.0123425	100516027	SFRP2	secreted frizzled related protein 2 [Source:VGNC Symbol;Acc:VGNC:92775]
SHvsP	ENSSSCG00000009053	42.8267	-2.41946	0.364792	-6.63244	3.30181e-11	2.43398e-09	100624789	RNF150	ring finger protein 150 [Source:VGNC Symbol;Acc:VGNC:98293]
SHvsP	ENSSSCG00000009115	132.896	-2.03493	0.368285	-5.52543	3.28672e-08	9.42434e-07	100525060	NDST3	N-deacetylase and N-sulfotransferase 3 [Source:VGNC Symbol;Acc:VGNC:90635]
SHvsP	ENSSSCG00000009434	21.9682	-2.11728	0.500427	-4.23095	2.32707e-05	0.000246058	100625944	RGCC	regulator of cell cycle [Source:VGNC Symbol;Acc:VGNC:92251]
SHvsP	ENSSSCG00000009720	27.9409	-2.38249	0.676206	-3.52333	0.000426164	0.00279525	100158037	DDX60	DExD/H-box helicase 60 [Source:VGNC Symbol;Acc:VGNC:87234]
SHvsP	ENSSSCG00000009870	7.53886	-2.13296	0.649762	-3.28267	0.00102828	0.00568052	100154365	SDSL	serine dehydratase like [Source:VGNC Symbol;Acc:VGNC:92665]
SHvsP	ENSSSCG00000009951	32.0788	-5.38056	0.913855	-5.88776	3.91469e-09	1.51014e-07	100152606	SGSM1	small G protein signaling modulator 1 [Source:VGNC Symbol;Acc:VGNC:92800]
SHvsP	ENSSSCG00000010304	2.93248	-2.2466	0.726035	-3.09434	0.0019725	0.00968195	574060	MYOZ1	myozenin 1 [Source:VGNC Symbol;Acc:VGNC:90542]
SHvsP	ENSSSCG00000010506	8.09867	-3.08374	0.534319	-5.77135	7.86371e-09	2.79108e-07	397416	OPALIN	oligodendrocytic myelin paranodal and inner loop protein [Source:VGNC Symbol;Acc:VGNC:91046]
SHvsP	ENSSSCG00000010507	98.6382	-2.88055	0.317676	-9.06757	1.21701e-19	7.42883e-17	100157589	TLL2	tolloid like 2 [Source:VGNC Symbol;Acc:VGNC:94019]
SHvsP	ENSSSCG00000010639	11.5029	-2.24344	0.557985	-4.0206	5.80498e-05	0.000532479	100157966	HABP2	hyaluronan binding protein 2 [Source:NCBI gene (formerly Entrezgene);Acc:100157966]
SHvsP	ENSSSCG00000010640	40.7204	-2.26444	0.496156	-4.56396	5.01972e-06	6.86695e-05	733691	NRAP	nebulin related anchoring protein [Source:VGNC Symbol;Acc:VGNC:90888]
SHvsP	ENSSSCG00000010701	91.3227	-5.71274	0.996828	-5.73092	9.98848e-09	3.44451e-07	100737536	BTBD16	BTB domain containing 16 [Source:VGNC Symbol;Acc:VGNC:85902]
SHvsP	ENSSSCG00000010800	23.1513	-2.42847	0.517904	-4.68903	2.74498e-06	4.09341e-05	100525885	B3GALT2	beta-1,3-galactosyltransferase 2 [Source:VGNC Symbol;Acc:VGNC:96495]
SHvsP	ENSSSCG00000011059	100.051	-2.12591	0.333733	-6.37011	1.88891e-10	1.08155e-08
SHvsP	ENSSSCG00000011060	100.046	-4.43159	0.493982	-8.97115	2.93428e-19	1.56271e-16	396929	GAD2	glutamate decarboxylase 2 [Source:NCBI gene (formerly Entrezgene);Acc:396929]
SHvsP	ENSSSCG00000011322	26.5345	-2.31474	0.584643	-3.95924	7.51888e-05	0.00065946	414374	CCR1	C-C motif chemokine receptor 1 [Source:NCBI gene (formerly Entrezgene);Acc:414374]
SHvsP	ENSSSCG00000011349	4.69552	-2.3583	0.722307	-3.26495	0.00109482	0.00598452	110256441	NPG1	protegrin 4 [Source:NCBI gene (formerly Entrezgene);Acc:396871]
SHvsP	ENSSSCG00000011486	3.34357	-2.02351	0.678951	-2.98035	0.00287922	0.0131358	100157232	C3orf14	chromosome 13 C3orf14 homolog [Source:VGNC Symbol;Acc:VGNC:85931]
SHvsP	ENSSSCG00000011609	29.6339	-2.02097	0.322007	-6.27616	3.47027e-10	1.86943e-08	100621722	FBLN2	fibulin 2 [Source:HGNC Symbol;Acc:HGNC:3601]
SHvsP	ENSSSCG00000011850	14.6651	-4.18958	0.643833	-6.50725	7.65391e-11	4.94193e-09	100157344	ENSSSCG00000011850	mucin 4, cell surface associated [Source:NCBI gene (formerly Entrezgene);Acc:100157344]
SHvsP	ENSSSCG00000011905	0.975476	-3.07814	1.17935	-2.61003	0.00905331	0.0327991	100511595	ENSSSCG00000011905
SHvsP	ENSSSCG00000011964	27.5339	-2.02976	0.337886	-6.00722	1.88726e-09	8.10452e-08	100522706	LNP1	leukemia NUP98 fusion partner 1 [Source:HGNC Symbol;Acc:HGNC:28014]
SHvsP	ENSSSCG00000011977	243.365	-2.1246	0.312069	-6.80809	9.89001e-12	8.26043e-10	106504106	DCBLD2	discoidin, CUB and LCCL domain containing 2 [Source:VGNC Symbol;Acc:VGNC:87180]
SHvsP	ENSSSCG00000012310	9.43585	-2.23518	0.661352	-3.37971	0.000725613	0.00425095	448811	BMP15	bone morphotic protein 15 [Source:VGNC Symbol;Acc:VGNC:85840]
SHvsP	ENSSSCG00000012638	62.752	-2.88809	0.503077	-5.74084	9.4209e-09	3.27358e-07	100519996	GRIA3	glutamate ionotropic receptor AMPA type subunit 3 [Source:VGNC Symbol;Acc:VGNC:88672]
SHvsP	ENSSSCG00000012883	66.9702	-2.35036	0.690999	-3.4014	0.000670422	0.00399284	397465	GAL	galanin and GMAP prepropeptide [Source:VGNC Symbol;Acc:VGNC:98016]
SHvsP	ENSSSCG00000013377	1.36253	-3.6458	1.06873	-3.41133	0.000646457	0.00388856	100514274	USH1C	USH1 protein network component harmonin [Source:VGNC Symbol;Acc:VGNC:94738]
SHvsP	ENSSSCG00000013767	125.652	-3.07412	0.429632	-7.15523	8.3531e-13	9.68747e-11	100513460	PALM3	paralemmin 3 [Source:VGNC Symbol;Acc:VGNC:91161]
SHvsP	ENSSSCG00000013869	7.26278	-3.4679	0.639986	-5.41871	6.00304e-08	1.598e-06
SHvsP	ENSSSCG00000013880	114.963	-3.57867	0.628083	-5.69777	1.21386e-08	4.07784e-07	100627038	ENSSSCG00000013880	unc-13 homolog A [Source:VGNC Symbol;Acc:VGNC:100880]
SHvsP	ENSSSCG00000014213	1.14885	-2.85553	1.17021	-2.44018	0.0146798	0.0478843	100519705	KCNN2	potassium calcium-activated channel subfamily N member 2 [Source:VGNC Symbol;Acc:VGNC:89380]
SHvsP	ENSSSCG00000014395	11.7595	-2.58776	0.568351	-4.5531	5.28611e-06	7.16676e-05	100520068	PCDH12	protocadherin 12 [Source:VGNC Symbol;Acc:VGNC:91212]
SHvsP	ENSSSCG00000014897	1.25224	-2.64555	1.05604	-2.50516	0.0122396	0.0416635	100517667	FAM181B	family with sequence similarity 181 member B [Source:VGNC Symbol;Acc:VGNC:87936]
SHvsP	ENSSSCG00000015100	324.15	-2.68965	0.411392	-6.53793	6.23778e-11	4.20657e-09	397075	UPK2	uroplakin 2 [Source:VGNC Symbol;Acc:VGNC:94723]
SHvsP	ENSSSCG00000015297	87.4953	-4.51878	0.649374	-6.95867	3.43509e-12	3.2075e-10	100513676	ADAM22	ADAM metallopeptidase domain 22 [Source:VGNC Symbol;Acc:VGNC:85067]
SHvsP	ENSSSCG00000015299	99.8183	-2.98188	0.49736	-5.99542	2.02958e-09	8.65447e-08	100310802	STEAP4	STEAP4 metalloreductase [Source:VGNC Symbol;Acc:VGNC:93544]
SHvsP	ENSSSCG00000015401	32.024	-2.00021	0.394191	-5.07421	3.89102e-07	7.95147e-06	100524640	PCLO	piccolo presynaptic cytomatrix protein [Source:HGNC Symbol;Acc:HGNC:13406]
SHvsP	ENSSSCG00000015595	286.399	-2.4508	0.342935	-7.14656	8.89827e-13	1.02544e-10	100738612	ATF3	activating transcription factor 3 [Source:VGNC Symbol;Acc:VGNC:85606]
SHvsP	ENSSSCG00000015652	4.53019	-3.80193	1.0752	-3.53602	0.000406198	0.00267779	397106	IL10	interleukin 10 [Source:NCBI gene (formerly Entrezgene);Acc:397106]
SHvsP	ENSSSCG00000015753	4.34167	-2.34103	0.788158	-2.97025	0.00297555	0.0134706	396730	ANGPT2	angiopoietin 2 [Source:NCBI gene (formerly Entrezgene);Acc:396730]
SHvsP	ENSSSCG00000015807	7.63482	-2.13573	0.444435	-4.80549	1.54373e-06	2.54974e-05	100525542	ADAM32	ADAM metallopeptidase domain 32 [Source:HGNC Symbol;Acc:HGNC:15479]
SHvsP	ENSSSCG00000015926	6.98551	-3.35208	0.822569	-4.07514	4.59876e-05	0.000437712	100518154	ABCB11	ATP binding cassette subfamily B member 11 [Source:VGNC Symbol;Acc:VGNC:97853]
SHvsP	ENSSSCG00000016064	3.26592	-2.13506	0.708884	-3.01187	0.00259648	0.0120918	654831	TMEFF2	transmembrane protein with EGF like and two follistatin like domains 2 [Source:HGNC Symbol;Acc:HGNC:11867]
SHvsP	ENSSSCG00000016182	1.83039	-4.07705	1.25752	-3.24213	0.00118642	0.00639025	100156394	RUFY4	RUN and FYVE domain containing 4 [Source:VGNC Symbol;Acc:VGNC:96056]
SHvsP	ENSSSCG00000016613	299.449	-3.00781	0.394699	-7.62052	2.52665e-14	4.10762e-12	100513962	AASS	aminoadipate-semialdehyde synthase [Source:VGNC Symbol;Acc:VGNC:84944]
SHvsP	ENSSSCG00000016652	827.472	-6.85983	0.681402	-10.0672	7.71139e-24	8.77556e-21	100520161	LRRN3	leucine rich repeat neuronal 3 [Source:VGNC Symbol;Acc:VGNC:89862]
SHvsP	ENSSSCG00000016746	10.579	-6.64561	0.979537	-6.78444	1.16537e-11	9.55812e-10	100515982	NPC1L1	NPC1 like intracellular cholesterol transporter 1 [Source:VGNC Symbol;Acc:VGNC:90842]
SHvsP	ENSSSCG00000016983	394.057	-2.81765	0.553848	-5.08741	3.62986e-07	7.50199e-06	100126236	STC2	stanniocalcin 2 [Source:VGNC Symbol;Acc:VGNC:93543]
SHvsP	ENSSSCG00000017072	64.4051	-3.33712	0.354404	-9.41616	4.67894e-21	4.4839e-18	100511419	GALNT10	polypeptide N-acetylgalactosaminyltransferase 10 [Source:VGNC Symbol;Acc:VGNC:88327]
SHvsP	ENSSSCG00000019358	13.977	-2.40441	0.40673	-5.91157	3.38871e-09	1.3472e-07
SHvsP	ENSSSCG00000021255	136.499	-2.1305	0.42089	-5.0619	4.15102e-07	8.36082e-06	100625920	ADA	adenosine deaminase [Source:VGNC Symbol;Acc:VGNC:95889]
SHvsP	ENSSSCG00000021464	47.833	-2.43112	0.348105	-6.98387	2.8715e-12	2.80374e-10	100628166	SOAT1	sterol O-acyltransferase 1 [Source:VGNC Symbol;Acc:VGNC:93327]
SHvsP	ENSSSCG00000021557	524.178	-2.51944	0.298422	-8.44254	3.10503e-17	1.04697e-14	396640	SULT1A3	sulfotransferase family 1A member 3 [Source:NCBI gene (formerly Entrezgene);Acc:396640]
SHvsP	ENSSSCG00000021910	11.5908	-3.45915	0.635427	-5.44382	5.21488e-08	1.41088e-06	445524	GAST	gastrin [Source:VGNC Symbol;Acc:VGNC:98994]
SHvsP	ENSSSCG00000022114	1.97927	-2.36926	0.954271	-2.48279	0.0130356	0.0438001	100620949	ENSSSCG00000022114	membrane spanning 4-domains A14 [Source:VGNC Symbol;Acc:VGNC:90409]
SHvsP	ENSSSCG00000022829	1.14147	-2.91782	1.10825	-2.63282	0.008468	0.031136
SHvsP	ENSSSCG00000022951	230.844	-3.51189	0.666265	-5.27101	1.35678e-07	3.23355e-06	100626921	NFASC	neurofascin [Source:VGNC Symbol;Acc:VGNC:90707]
SHvsP	ENSSSCG00000023041	49.5865	-2.41001	0.384615	-6.26604	3.70353e-10	1.97175e-08	100624867	ENSSSCG00000023041
SHvsP	ENSSSCG00000023186	30.4579	-3.33402	0.522279	-6.3836	1.72969e-10	1.003e-08	100511956	CA4	carbonic anhydrase 4 [Source:VGNC Symbol;Acc:VGNC:86100]
SHvsP	ENSSSCG00000023235	97.2474	-4.2418	0.428426	-9.90089	4.12572e-23	4.41889e-20	100524150	MAN1C1	mannosidase alpha class 1C member 1 [Source:VGNC Symbol;Acc:VGNC:89968]
SHvsP	ENSSSCG00000023462	3.80677	-4.7386	1.35819	-3.4889	0.00048502	0.0030976	100620104	GPR50	G protein-coupled receptor 50 [Source:VGNC Symbol;Acc:VGNC:88633]
SHvsP	ENSSSCG00000023525	32.6438	-4.04485	0.824301	-4.90701	9.24755e-07	1.6524e-05	100157089	TMEM26	transmembrane protein 26 [Source:VGNC Symbol;Acc:VGNC:94163]
SHvsP	ENSSSCG00000024233	2.33149	-2.76059	0.971392	-2.84189	0.00448467	0.0187372	100516775	RAB39B	RAB39B, member RAS onco family [Source:VGNC Symbol;Acc:VGNC:98263]
SHvsP	ENSSSCG00000024344	16.9114	-3.1618	0.615429	-5.13756	2.78335e-07	5.96929e-06	414371	CCR5	chemokine (C-C motif) receptor 5 [Source:NCBI gene (formerly Entrezgene);Acc:414371]
SHvsP	ENSSSCG00000024347	11.563	-2.52383	0.629085	-4.0119	6.02314e-05	0.000548346	100158244	CRISP3	cysteine rich secretory protein 3 [Source:HGNC Symbol;Acc:HGNC:16904]
SHvsP	ENSSSCG00000024633	101.418	-2.70557	0.404526	-6.68826	2.25839e-11	1.72776e-09	100624964	JAKMIP3	Janus kinase and microtubule interacting protein 3 [Source:VGNC Symbol;Acc:VGNC:89275]
SHvsP	ENSSSCG00000024917	62.5212	-2.54965	0.365401	-6.97769	3.00083e-12	2.89096e-10
SHvsP	ENSSSCG00000025005	236.167	-6.77823	0.731254	-9.26932	1.87334e-20	1.31191e-17	100517222	ENSSSCG00000025005	beta-1,4-galactosyltransferase 6 [Source:VGNC Symbol;Acc:VGNC:85734]
SHvsP	ENSSSCG00000025097	29.466	-2.4843	0.421498	-5.89399	3.76976e-09	1.4698e-07	100628096	TMEM61	transmembrane protein 61 [Source:VGNC Symbol;Acc:VGNC:94195]
SHvsP	ENSSSCG00000025468	4.23214	-2.60753	0.686331	-3.79924	0.000145142	0.0011352	100158001	ENSSSCG00000025468
SHvsP	ENSSSCG00000025858	6.62631	-2.67767	0.54498	-4.91334	8.95357e-07	1.60617e-05	100628118	ELN	elastin [Source:VGNC Symbol;Acc:VGNC:87655]
SHvsP	ENSSSCG00000026317	24.2754	-2.19251	0.639725	-3.42727	0.000609675	0.00370402	100625109	SLC10A2	solute carrier family 10 member 2 [Source:VGNC Symbol;Acc:VGNC:92915]
SHvsP	ENSSSCG00000026451	4.55288	-2.32664	0.640119	-3.6347	0.000278304	0.00195576
SHvsP	ENSSSCG00000028115	2.71685	-3.19621	0.974167	-3.28097	0.00103451	0.00570798	100738255	ALDH8A1	aldehyde dehydrogenase 8 family member A1 [Source:VGNC Symbol;Acc:VGNC:85244]
SHvsP	ENSSSCG00000028674	4.51652	-2.63947	0.775447	-3.40381	0.000664533	0.00396845
SHvsP	ENSSSCG00000029249	43.3677	-2.82379	0.339062	-8.32823	8.20582e-17	2.5324e-14	100622883	NAV3	neuron navigator 3 [Source:VGNC Symbol;Acc:VGNC:90589]
SHvsP	ENSSSCG00000029284	53.5607	-2.39399	0.270546	-8.84877	8.84926e-19	4.06069e-16	100622946	NPHS1	NPHS1 adhesion molecule, nephrin [Source:VGNC Symbol;Acc:VGNC:90849]
SHvsP	ENSSSCG00000029295	4.11032	-3.533	0.942293	-3.74937	0.00017728	0.00133767	100113429	BPIFB4	BPI fold containing family B member 4 [Source:VGNC Symbol;Acc:VGNC:95773]
SHvsP	ENSSSCG00000029592	668.184	-4.61243	0.422659	-10.9129	1.00045e-27	3.49358e-24	100624186	GPRC5A	G protein-coupled receptor class C group 5 member A [Source:VGNC Symbol;Acc:VGNC:88642]
SHvsP	ENSSSCG00000030513	1.77059	-2.42359	0.980196	-2.47256	0.0134151	0.0448049	100623546	CFAP74	cilia and flagella associated protein 74 [Source:VGNC Symbol;Acc:VGNC:96949]
SHvsP	ENSSSCG00000031290	4.91368	-2.4033	0.688316	-3.49157	0.000480191	0.00307443	100736832	GRIN2A	glutamate ionotropic receptor NMDA type subunit 2A [Source:VGNC Symbol;Acc:VGNC:88683]
SHvsP	ENSSSCG00000031344	37.2954	-2.98962	0.408863	-7.31204	2.6311e-13	3.49686e-11	110261085	AJAP1	adherens junctions associated protein 1 [Source:VGNC Symbol;Acc:VGNC:85207]
SHvsP	ENSSSCG00000031565	6.81856	-2.25256	0.616869	-3.6516	0.00026061	0.00184853
SHvsP	ENSSSCG00000031696	4.2594	-2.41676	0.625263	-3.86519	0.000111002	0.000909596	100625168	ENSSSCG00000031696
SHvsP	ENSSSCG00000031818	154.853	-2.81464	0.391818	-7.18354	6.79272e-13	8.13696e-11
SHvsP	ENSSSCG00000031944	1.68881	-3.04551	0.989743	-3.07707	0.00209047	0.010161	106504136	SLC17A4	solute carrier family 17 member 4 [Source:HGNC Symbol;Acc:HGNC:10932]
SHvsP	ENSSSCG00000031988	7.30256	-4.32814	0.961846	-4.49982	6.80102e-06	8.8389e-05	396571	MYOCD	myocardin [Source:VGNC Symbol;Acc:VGNC:90536]
SHvsP	ENSSSCG00000032177	1.85191	-2.11106	0.825362	-2.55774	0.0105355	0.0368762	100621555	MYO3B	myosin IIIB [Source:HGNC Symbol;Acc:HGNC:15576]
SHvsP	ENSSSCG00000032433	54.6968	-2.95574	0.343722	-8.59923	8.02548e-18	3.04433e-15	100151829	PTCHD1	patched domain containing 1 [Source:VGNC Symbol;Acc:VGNC:91942]
SHvsP	ENSSSCG00000032434	17.4041	-2.17567	0.353604	-6.15285	7.61027e-10	3.66581e-08	100521017	PLAUR	plasminogen activator, urokinase receptor [Source:VGNC Symbol;Acc:VGNC:91512]
SHvsP	ENSSSCG00000032691	13.0611	-2.75627	0.525362	-5.24642	1.55085e-07	3.61561e-06	100155360	ANKRD66	ankyrin repeat domain 66 [Source:HGNC Symbol;Acc:HGNC:44669]
SHvsP	ENSSSCG00000032803	170.104	-2.24352	0.34307	-6.53955	6.17047e-11	4.17665e-09	106510546	CYP2S1	cytochrome P450 family 2 subfamily S member 1 [Source:VGNC Symbol;Acc:VGNC:103351]
SHvsP	ENSSSCG00000032857	742.615	-4.28526	0.388264	-11.037	2.5337e-28	1.15334e-24	100301483	S100A12	S100 calcium binding protein A12 [Source:VGNC Symbol;Acc:VGNC:92538]
SHvsP	ENSSSCG00000033514	17.768	-5.90847	0.894234	-6.6073	3.914e-11	2.78383e-09	100240719	CRHR2	corticotropin releasing hormone receptor 2 [Source:VGNC Symbol;Acc:VGNC:86994]
SHvsP	ENSSSCG00000033560	386.167	-4.38525	0.408046	-10.7469	6.12607e-27	1.59348e-23	110261637	ENSSSCG00000033560
SHvsP	ENSSSCG00000033669	1083.84	-2.41426	0.273446	-8.82903	1.05592e-18	4.57765e-16	100127136	RDH10	retinol dehydrogenase 10 [Source:VGNC Symbol;Acc:VGNC:92190]
SHvsP	ENSSSCG00000033800	3.86472	-2.02219	0.582692	-3.47042	0.000519638	0.00326938	100152019	PELI2	pellino E3 ubiquitin protein ligase family member 2 [Source:VGNC Symbol;Acc:VGNC:91307]
SHvsP	ENSSSCG00000034335	4.36253	-2.47026	0.619529	-3.98731	6.68256e-05	0.00059821
SHvsP	ENSSSCG00000034393	1.23288	-3.46548	1.16525	-2.97401	0.00293937	0.0133533
SHvsP	ENSSSCG00000034431	3.97531	-4.78839	1.12182	-4.26841	1.96868e-05	0.000213113
SHvsP	ENSSSCG00000035105	148.962	-5.29313	0.739638	-7.15638	8.28372e-13	9.66859e-11	100154205	ENSSSCG00000035105	dual specificity phosphatase 13 [Source:NCBI gene (formerly Entrezgene);Acc:100154205]
SHvsP	ENSSSCG00000035621	10.535	-2.05605	0.511421	-4.02027	5.8131e-05	0.000532956	100623822	GABRB1	gamma-aminobutyric acid type A receptor subunit beta1 [Source:VGNC Symbol;Acc:VGNC:88306]
SHvsP	ENSSSCG00000035677	1.52872	-2.40767	0.92885	-2.5921	0.00953911	0.0341234	110256018	EPOP	elongin BC and polycomb repressive complex 2 associated protein [Source:VGNC Symbol;Acc:VGNC:87745]
SHvsP	ENSSSCG00000036045	2.5287	-4.57974	1.03324	-4.43241	9.31847e-06	0.000114585	100152135	ENSSSCG00000036045
SHvsP	ENSSSCG00000036138	3.27901	-3.62596	0.988168	-3.66938	0.000243139	0.00174226
SHvsP	ENSSSCG00000036213	419.608	-2.02491	0.277435	-7.2987	2.90563e-13	3.83374e-11
SHvsP	ENSSSCG00000036435	182.769	-3.81708	0.678438	-5.62628	1.84133e-08	5.82066e-07
SHvsP	ENSSSCG00000036695	135.408	-2.64331	0.17207	-15.3619	2.94954e-53	5.37052e-49	100621977	IGF2BP3	insulin like growth factor 2 mRNA binding protein 3 [Source:VGNC Symbol;Acc:VGNC:89056]
SHvsP	ENSSSCG00000036865	6.48558	-4.3896	0.884482	-4.96291	6.94445e-07	1.2982e-05	100155595	SDS	serine dehydratase [Source:HGNC Symbol;Acc:HGNC:10691]
SHvsP	ENSSSCG00000036990	17.5927	-2.14473	0.432251	-4.96176	6.98564e-07	1.30456e-05	414378	DIO3	iodothyronine deiodinase 3 [Source:VGNC Symbol;Acc:VGNC:87305]
SHvsP	ENSSSCG00000037534	58.359	-2.42955	0.389548	-6.23683	4.46517e-10	2.29666e-08	100738337	OPCML	opioid binding protein/cell adhesion molecule like [Source:VGNC Symbol;Acc:VGNC:91047]
SHvsP	ENSSSCG00000037645	427.544	-2.14932	0.302302	-7.10984	1.1618e-12	1.25917e-10	100621773	ENSSSCG00000037645
SHvsP	ENSSSCG00000037987	142.284	-2.43708	0.414141	-5.88466	3.98867e-09	1.52432e-07	102163819	MS4A10	membrane spanning 4-domains A10 [Source:VGNC Symbol;Acc:VGNC:90407]
SHvsP	ENSSSCG00000038062	9.58673	-2.14463	0.530547	-4.0423	5.29304e-05	0.000491324	100157298	ENSSSCG00000038062	SAM domain, SH3 domain and nuclear localization signals 1 [Source:VGNC Symbol;Acc:VGNC:92573]
SHvsP	ENSSSCG00000038141	5.92093	-2.26916	0.481921	-4.70858	2.49444e-06	3.76295e-05	100520421	ENSSSCG00000038141	toll like receptor adaptor molecule 2 [Source:NCBI gene (formerly Entrezgene);Acc:100520421]
SHvsP	ENSSSCG00000038429	22.1268	-2.46583	0.336	-7.33878	2.15549e-13	2.95092e-11
SHvsP	ENSSSCG00000038606	4.92241	-2.63322	0.744128	-3.53867	0.000402143	0.00265587	102160380	ENSSSCG00000038606
SHvsP	ENSSSCG00000038616	8.17974	-2.62324	0.634148	-4.13664	3.52432e-05	0.000351236	100513671	ENSSSCG00000038616
SHvsP	ENSSSCG00000038637	8.96527	-3.04882	0.614694	-4.95989	7.05327e-07	1.31315e-05
SHvsP	ENSSSCG00000039245	30.6754	-2.78785	0.362563	-7.68928	1.47969e-14	2.54172e-12	100511883	RIMS3	regulating synaptic membrane exocytosis 3 [Source:VGNC Symbol;Acc:VGNC:92310]
SHvsP	ENSSSCG00000039270	12.9716	-2.83574	0.597444	-4.74646	2.07007e-06	3.2493e-05	100737974	TREM2	triggering receptor expressed on myeloid cells 2 [Source:VGNC Symbol;Acc:VGNC:94384]
SHvsP	ENSSSCG00000039316	71.828	-2.15353	0.493948	-4.35982	1.30169e-05	0.000151059	100513795	GSG1	germ cell associated 1 [Source:VGNC Symbol;Acc:VGNC:88721]
SHvsP	ENSSSCG00000039318	136.964	-2.03741	0.257548	-7.91077	2.55794e-15	5.35344e-13	100737777	HS3ST3B1	heparan sulfate-glucosamine 3-sulfotransferase 3B1 [Source:VGNC Symbol;Acc:VGNC:99003]
SHvsP	ENSSSCG00000039339	3.96703	-2.4995	0.775429	-3.22338	0.00126688	0.0067054	100737336	ENSSSCG00000039339
SHvsP	ENSSSCG00000039561	49.0642	-3.34467	0.37802	-8.84787	8.92068e-19	4.06069e-16
SHvsP	ENSSSCG00000039651	311.307	-2.83282	0.27334	-10.3637	3.62507e-25	7.33392e-22	100625876	SLC2A5	solute carrier family 2 member 5 [Source:VGNC Symbol;Acc:VGNC:93050]
SHvsP	ENSSSCG00000039874	1.76509	-4.01582	1.30899	-3.06788	0.00215582	0.0104314	780409	CCL26	C-C motif chemokine ligand 26 [Source:VGNC Symbol;Acc:VGNC:86341]
SHvsP	ENSSSCG00000039903	1.35321	-3.07216	0.996763	-3.08214	0.00205518	0.0100324	100153102	SPATS1	spermatosis associated serine rich 1 [Source:VGNC Symbol;Acc:VGNC:93392]
SHvsP	ENSSSCG00000039904	48.4611	-2.52487	0.384748	-6.5624	5.29469e-11	3.65173e-09
SHvsP	ENSSSCG00000040382	913.037	-6.84573	0.674326	-10.152	3.24751e-24	4.22362e-21
SHvsP	ENSSSCG00000040397	16.1195	-2.8232	0.467485	-6.03912	1.54953e-09	6.84449e-08	102166764	COLEC12	collectin subfamily member 12 [Source:VGNC Symbol;Acc:VGNC:96956]
SHvsP	ENSSSCG00000040557	7.22273	-3.11807	0.607667	-5.13121	2.8788e-07	6.15226e-06	100154799	SERTM1	serine rich and transmembrane domain containing 1 [Source:VGNC Symbol;Acc:VGNC:98311]
SHvsP	ENSSSCG00000040836	1.01505	-3.10807	1.20722	-2.57457	0.0100364	0.0355076	100152102	DCC	DCC netrin 1 receptor [Source:VGNC Symbol;Acc:VGNC:103078]
SHvsP	ENSSSCG00000040961	25.2715	-4.37781	0.667281	-6.56066	5.35702e-11	3.68078e-09	399503	LIF	LIF interleukin 6 family cytokine [Source:VGNC Symbol;Acc:VGNC:89719]
SHvsP	ENSSSCG00000040981	3.609	-2.66403	0.699451	-3.80875	0.000139673	0.00109761	100515973	GMFG	glia maturation factor gamma [Source:VGNC Symbol;Acc:VGNC:88510]
SHvsP	ENSSSCG00000041503	1.99504	-2.20367	0.846651	-2.60281	0.00924626	0.0332522
SHvsP	ENSSSCG00000041660	1.13135	-3.42966	1.19177	-2.8778	0.00400461	0.0171446	100153329	H2AC1	H2A clustered histone 1 [Source:HGNC Symbol;Acc:HGNC:18729]
SHvsP	ENSSSCG00000041733	11.7012	-3.24436	0.571241	-5.67949	1.35097e-08	4.47244e-07	100156127	ENSSSCG00000041733
SHvsP	ENSSSCG00000041774	6.38149	-2.30163	0.559397	-4.11448	3.8805e-05	0.000379887
SHvsP	ENSSSCG00000041851	1.2807	-3.09756	1.22814	-2.52215	0.0116639	0.0400334
SHvsP	ENSSSCG00000042043	11.173	-2.07263	0.669811	-3.09434	0.00197248	0.00968195
SHvsP	ENSSSCG00000042118	2.01335	-2.30981	0.887381	-2.60295	0.00924244	0.0332516	100522704	TAFA1	TAFA chemokine like family member 1 [Source:HGNC Symbol;Acc:HGNC:21587]
SHvsP	ENSSSCG00000042123	2.15476	-3.03714	0.985461	-3.08195	0.00205647	0.0100348
SHvsP	ENSSSCG00000042333	2.1845	-2.87166	0.97915	-2.93281	0.00335909	0.0148886
SHvsP	ENSSSCG00000042384	4.27185	-3.39427	0.838957	-4.04582	5.21397e-05	0.000485357
SHvsP	ENSSSCG00000042548	2.28052	-2.0846	0.815739	-2.55548	0.0106042	0.0370597
SHvsP	ENSSSCG00000042625	32.1866	-2.29313	0.321377	-7.13531	9.65699e-13	1.09897e-10
SHvsP	ENSSSCG00000042771	2.14024	-4.26465	1.36164	-3.132	0.00173619	0.00872552
SHvsP	ENSSSCG00000042878	24.8151	-4.1137	0.511428	-8.04355	8.727e-16	2.0372e-13
SHvsP	ENSSSCG00000043022	3.67701	-5.06602	1.05744	-4.79084	1.66085e-06	2.71116e-05
SHvsP	ENSSSCG00000043139	10.8503	-2.97687	0.552071	-5.39219	6.96044e-08	1.80278e-06
SHvsP	ENSSSCG00000043196	1010.05	-3.07513	0.396619	-7.75337	8.94867e-15	1.64583e-12
SHvsP	ENSSSCG00000043242	6138.09	-5.32256	0.541108	-9.8364	7.84653e-23	7.9372e-20
SHvsP	ENSSSCG00000043291	3.37375	-2.54506	0.717633	-3.54647	0.000390432	0.00258791
SHvsP	ENSSSCG00000043529	2.23112	-2.60158	0.997595	-2.60785	0.00911117	0.0329293
SHvsP	ENSSSCG00000043656	1.66673	-2.95787	1.08023	-2.7382	0.00617764	0.02431
SHvsP	ENSSSCG00000043756	839.244	-2.56747	0.41812	-6.14052	8.22541e-10	3.90143e-08
SHvsP	ENSSSCG00000043977	44.8812	-3.40179	0.257467	-13.2126	7.42548e-40	6.76016e-36	100519366	ENSSSCG00000043977
SHvsP	ENSSSCG00000044096	11507.1	-2.06234	0.412839	-4.9955	5.86848e-07	1.12693e-05
SHvsP	ENSSSCG00000044605	6.22257	-2.54039	0.608824	-4.17262	3.01121e-05	0.000308773
SHvsP	ENSSSCG00000044630	2.74959	-3.78523	1.16889	-3.23832	0.00120237	0.00644607
SHvsP	ENSSSCG00000044632	19.1793	-2.53585	0.426261	-5.94905	2.697e-09	1.10601e-07
SHvsP	ENSSSCG00000044664	8.73527	-4.30929	0.852617	-5.05419	4.32216e-07	8.65666e-06
SHvsP	ENSSSCG00000044761	5.78485	-2.18146	0.550498	-3.96271	7.41032e-05	0.000652768
SHvsP	ENSSSCG00000044768	129.946	-2.29737	0.315599	-7.27941	3.35286e-13	4.39201e-11
SHvsP	ENSSSCG00000044997	7.32258	-2.5067	0.540477	-4.63794	3.51904e-06	5.02547e-05
SHvsP	ENSSSCG00000045069	259.509	-3.3344	0.422159	-7.89843	2.82439e-15	5.71405e-13
SHvsP	ENSSSCG00000045333	8.2906	-5.46715	0.928748	-5.88658	3.94265e-09	1.51771e-07
SHvsP	ENSSSCG00000045347	1.61265	-3.05767	1.00228	-3.05072	0.00228294	0.0109331
SHvsP	ENSSSCG00000045573	1.37448	-3.16389	1.0509	-3.01065	0.00260688	0.0121273
SHvsP	ENSSSCG00000045649	26.5113	-2.59555	0.343142	-7.56409	3.90595e-14	6.23855e-12
SHvsP	ENSSSCG00000045712	90.1251	-2.40733	0.383337	-6.27991	3.38758e-10	1.83352e-08	100158055	OLFML3	olfactomedin like 3 [Source:HGNC Symbol;Acc:HGNC:24956]
SHvsP	ENSSSCG00000045846	6.12197	-2.19847	0.49592	-4.43312	9.28798e-06	0.000114422
SHvsP	ENSSSCG00000045922	40.8859	-2.40595	0.426482	-5.64139	1.68684e-08	5.38843e-07
SHvsP	ENSSSCG00000046754	13.3451	-2.06729	0.353784	-5.84337	5.11559e-09	1.92051e-07
SHvsP	ENSSSCG00000046881	133.37	-8.03581	1.17354	-6.84747	7.51671e-12	6.48645e-10	102165141	DPRX	divergent-paired related homeobox [Source:HGNC Symbol;Acc:HGNC:32166]
SHvsP	ENSSSCG00000047186	22.0899	-2.36767	0.334499	-7.07827	1.4597e-12	1.56342e-10
SHvsP	ENSSSCG00000047202	3.02173	-2.16674	0.825271	-2.62549	0.00865236	0.0316668
SHvsP	ENSSSCG00000047326	3.83581	-2.20306	0.66135	-3.33115	0.000864868	0.00493034
SHvsP	ENSSSCG00000047430	1.97879	-2.83676	0.894396	-3.1717	0.00151549	0.00775551
SHvsP	ENSSSCG00000047463	3.66687	-2.21101	0.610299	-3.62283	0.000291394	0.00203206
SHvsP	ENSSSCG00000048009	1.97123	-4.62498	0.99846	-4.63211	3.61952e-06	5.1528e-05
SHvsP	ENSSSCG00000048122	2.5816	-2.08642	0.809553	-2.57725	0.00995902	0.0353202	106509841	ENSSSCG00000048122
SHvsP	ENSSSCG00000048194	3.20667	-2.21705	0.785981	-2.82075	0.0047912	0.0198089
SHvsP	ENSSSCG00000048589	46.2569	-4.30898	0.526099	-8.19044	2.60271e-16	6.96914e-14
SHvsP	ENSSSCG00000048628	0.906942	-3.49147	1.35892	-2.5693	0.0101905	0.0359382
SHvsP	ENSSSCG00000048728	1.45986	-2.67093	1.07949	-2.47425	0.0133516	0.0446311
SHvsP	ENSSSCG00000048738	1.16493	-2.92181	1.18825	-2.45891	0.0139358	0.0460764
SHvsP	ENSSSCG00000049061	35.1332	-2.83829	0.419062	-6.77295	1.26181e-11	1.02111e-09
SHvsP	ENSSSCG00000049114	5.34333	-4.79375	0.976566	-4.90878	9.16446e-07	1.64077e-05
SHvsP	ENSSSCG00000049117	285.087	-2.11804	0.301945	-7.01465	2.30521e-12	2.29116e-10
SHvsP	ENSSSCG00000049188	218.011	-2.7603	0.583605	-4.72973	2.24818e-06	3.4574e-05
SHvsP	ENSSSCG00000049300	4.7948	-4.2529	0.841935	-5.05134	4.38714e-07	8.75889e-06
SHvsP	ENSSSCG00000049374	4.58391	-3.58399	0.832066	-4.30734	1.6523e-05	0.000184798	102158424	ENSSSCG00000049374
SHvsP	ENSSSCG00000049399	15.1831	-2.02083	0.474204	-4.26151	2.03049e-05	0.000219283
SHvsP	ENSSSCG00000049534	158.599	-3.11289	0.417639	-7.45354	9.087e-14	1.34517e-11
SHvsP	ENSSSCG00000049543	4.36747	-5.7904	1.06791	-5.42216	5.88842e-08	1.5744e-06
SHvsP	ENSSSCG00000049721	3.04467	-2.83593	0.938676	-3.0212	0.00251773	0.011806
SHvsP	ENSSSCG00000049740	6.29382	-3.08928	0.60855	-5.07646	3.84522e-07	7.87556e-06
SHvsP	ENSSSCG00000049893	238.246	-4.02742	0.385327	-10.452	1.4354e-25	3.26698e-22
SHvsP	ENSSSCG00000050128	9.62283	-2.22513	0.477482	-4.66013	3.1601e-06	4.62906e-05
SHvsP	ENSSSCG00000050313	7.33862	-6.13028	1.03732	-5.90971	3.42711e-09	1.35949e-07
SHvsP	ENSSSCG00000050432	5.27958	-2.43026	0.629214	-3.86238	0.000112287	0.000917651
SHvsP	ENSSSCG00000050525	6.14654	-2.63313	0.632214	-4.16494	3.11438e-05	0.000316443
SHvsP	ENSSSCG00000051036	1.73977	-3.0294	1.15021	-2.63377	0.00844415	0.0310797
SHvsP	ENSSSCG00000051098	5.98714	-2.61755	0.635339	-4.11992	3.7901e-05	0.000372423
SHvsP	ENSSSCG00000051300	8.76502	-2.59876	0.496979	-5.22912	1.70321e-07	3.94556e-06
SHvsP	ENSSSCG00000051441	3.96643	-2.19292	0.554342	-3.95591	7.62442e-05	0.000666811
SHvsP	ENSSSCG00000051493	18.3065	-2.30816	0.50431	-4.57687	4.71984e-06	6.51546e-05
SHvsP	ENSSSCG00000051522	1.75347	-4.44469	1.12191	-3.96172	7.44121e-05	0.000655124
