# Supplementary material for: Altered hair root gene expression profiles highlight calcium signaling and lipid metabolism pathways to be associated with curly hair initiation and maintenance in Mangalitza pigs
Source: Front Genet. 2023 Jun 7;14:1184015. doi: 10.3389/fgene.2023.1184015 (PMC10282778; doi:10.3389/fgene.2023.1184015)
Supplement: Supplementary file 14 [file Table8.XLSX]

## Sheet: Sheet1
Table S8 Complete list of transcripts assigned to differentially expressed genes from SHvsP analysis. Differentially upregulated and downregulated genes are presented with their Ensembl ID and their unique transcript identifier and predicted transcripts assigned by Cufflinks tool.
Ensembl ID	Status	Transcripts ID	Chromosome	Strand	Start	End	Transcript name	Number of exons	Length	Cufflinks gene ID	Gene name	Description
ENSSSCG00000010903	Upregulated	143257	10	-	20740675	20766401	TCONS_00026601	8	4922	XLOC_007512	LHX9	LIM homeobox 9 [Source:VGNC Symbol;Acc:VGNC:95608]
ENSSSCG00000010903	Upregulated	143258	10	-	20742285	20760322	TCONS_00026602	8	1904	XLOC_007512	LHX9	LIM homeobox 9 [Source:VGNC Symbol;Acc:VGNC:95608]
ENSSSCG00000010903	Upregulated	143259	10	-	20742285	20766401	TCONS_00026603	8	5035	XLOC_007512	LHX9	LIM homeobox 9 [Source:VGNC Symbol;Acc:VGNC:95608]
ENSSSCG00000010903	Upregulated	143260	10	-	20742285	20766401	TCONS_00026604	8	4984	XLOC_007512	LHX9	LIM homeobox 9 [Source:VGNC Symbol;Acc:VGNC:95608]
ENSSSCG00000010903	Upregulated	143261	10	+	20742368	20764009	TCONS_00023150	8	2570	XLOC_006486	LHX9	LIM homeobox 9 [Source:VGNC Symbol;Acc:VGNC:95608]
ENSSSCG00000010903	Upregulated	143262	10	+	20742398	20761205	TCONS_00023151	8	2674	XLOC_006486	LHX9	LIM homeobox 9 [Source:VGNC Symbol;Acc:VGNC:95608]
ENSSSCG00000010903	Upregulated	143263	10	+	20742398	20764009	TCONS_00023152	8	2530	XLOC_006486	LHX9	LIM homeobox 9 [Source:VGNC Symbol;Acc:VGNC:95608]
ENSSSCG00000010903	Upregulated	143264	10	+	20747743	20761205	TCONS_00023153	5	2941	XLOC_006486	LHX9	LIM homeobox 9 [Source:VGNC Symbol;Acc:VGNC:95608]
ENSSSCG00000010903	Upregulated	143265	10	+	20747743	20762086	TCONS_00023154	5	3822	XLOC_006486	LHX9	LIM homeobox 9 [Source:VGNC Symbol;Acc:VGNC:95608]
ENSSSCG00000010903	Upregulated	143266	10	+	20747743	20764009	TCONS_00023155	5	2797	XLOC_006486	LHX9	LIM homeobox 9 [Source:VGNC Symbol;Acc:VGNC:95608]
ENSSSCG00000010903	Upregulated	143267	10	-	20747744	20763834	TCONS_00026605	5	2621	XLOC_007512	LHX9	LIM homeobox 9 [Source:VGNC Symbol;Acc:VGNC:95608]
ENSSSCG00000010903	Upregulated	143268	10	-	20747744	20766401	TCONS_00026606	5	5137	XLOC_007512	LHX9	LIM homeobox 9 [Source:VGNC Symbol;Acc:VGNC:95608]
ENSSSCG00000010903	Upregulated	143269	10	-	20750249	20763873	TCONS_00026607	4	2053	XLOC_007512	LHX9	LIM homeobox 9 [Source:VGNC Symbol;Acc:VGNC:95608]
ENSSSCG00000039358	Upregulated	166748	13	-	18995539	19085179	TCONS_00055863	13	8320	XLOC_015460	SUSD5	sushi domain containing 5 [Source:VGNC Symbol;Acc:VGNC:93635]
ENSSSCG00000039358	Upregulated	166749	13	-	18995539	19085179	TCONS_00055864	11	10710	XLOC_015460	SUSD5	sushi domain containing 5 [Source:VGNC Symbol;Acc:VGNC:93635]
ENSSSCG00000039358	Upregulated	166750	13	-	18995539	19085249	TCONS_00055865	12	10528	XLOC_015460	SUSD5	sushi domain containing 5 [Source:VGNC Symbol;Acc:VGNC:93635]
ENSSSCG00000039358	Upregulated	166751	13	-	18995539	19085575	TCONS_00055866	12	10854	XLOC_015460	SUSD5	sushi domain containing 5 [Source:VGNC Symbol;Acc:VGNC:93635]
ENSSSCG00000039358	Upregulated	166752	13	-	18995539	19085583	TCONS_00055867	12	8976	XLOC_015460	SUSD5	sushi domain containing 5 [Source:VGNC Symbol;Acc:VGNC:93635]
ENSSSCG00000039358	Upregulated	166753	13	-	18995539	19085584	TCONS_00055868	12	8845	XLOC_015460	SUSD5	sushi domain containing 5 [Source:VGNC Symbol;Acc:VGNC:93635]
ENSSSCG00000039358	Upregulated	166756	13	-	19040070	19085179	TCONS_00055870	5	5053	XLOC_015460	SUSD5	sushi domain containing 5 [Source:VGNC Symbol;Acc:VGNC:93635]
ENSSSCG00000036227	Upregulated	168274	13	+	29478116	29484916	TCONS_00047898	1	6801	XLOC_013321	ENSSSCG00000036227
ENSSSCG00000021606	Upregulated	117947	7	+	98718095	98772204	TCONS_00196152	12	3381	XLOC_052978	FLVCR2	FLVCR heme transporter 2 [Source:VGNC Symbol;Acc:VGNC:96581]
ENSSSCG00000021606	Upregulated	117948	7	+	98718095	98772204	TCONS_00196153	11	3442	XLOC_052978	FLVCR2	FLVCR heme transporter 2 [Source:VGNC Symbol;Acc:VGNC:96581]
ENSSSCG00000021606	Upregulated	117949	7	+	98718095	98807875	TCONS_00196154	5	1348	XLOC_052978	FLVCR2	FLVCR heme transporter 2 [Source:VGNC Symbol;Acc:VGNC:96581]
ENSSSCG00000021606	Upregulated	117950	7	+	98718095	98823839	TCONS_00196155	7	1469	XLOC_052978	FLVCR2	FLVCR heme transporter 2 [Source:VGNC Symbol;Acc:VGNC:96581]
ENSSSCG00000021606	Upregulated	117952	7	-	98718141	98768240	TCONS_00203323	9	1889	XLOC_054940	FLVCR2	FLVCR heme transporter 2 [Source:VGNC Symbol;Acc:VGNC:96581]
ENSSSCG00000021606	Upregulated	117953	7	+	98718456	98772198	TCONS_00196157	11	3135	XLOC_052978	FLVCR2	FLVCR heme transporter 2 [Source:VGNC Symbol;Acc:VGNC:96581]
ENSSSCG00000021606	Upregulated	117954	7	+	98745664	98807861	TCONS_00196158	9	911	XLOC_052978	FLVCR2	FLVCR heme transporter 2 [Source:VGNC Symbol;Acc:VGNC:96581]
ENSSSCG00000007453	Upregulated	218750	17	-	48966395	49243729	TCONS_00100597	16	2361	XLOC_027597	EYA2	EYA transcriptional coactivator and phosphatase 2 [Source:VGNC Symbol;Acc:VGNC:96292]
ENSSSCG00000007453	Upregulated	218751	17	+	48966814	49243743	TCONS_00096934	17	2621	XLOC_026586	EYA2	EYA transcriptional coactivator and phosphatase 2 [Source:VGNC Symbol;Acc:VGNC:96292]
ENSSSCG00000007453	Upregulated	218752	17	+	48966814	49243743	TCONS_00096935	15	2384	XLOC_026586	EYA2	EYA transcriptional coactivator and phosphatase 2 [Source:VGNC Symbol;Acc:VGNC:96292]
ENSSSCG00000007453	Upregulated	218753	17	+	48966814	49243743	TCONS_00096936	16	2531	XLOC_026586	EYA2	EYA transcriptional coactivator and phosphatase 2 [Source:VGNC Symbol;Acc:VGNC:96292]
ENSSSCG00000007453	Upregulated	218754	17	+	48966814	49243747	TCONS_00096937	14	2239	XLOC_026586	EYA2	EYA transcriptional coactivator and phosphatase 2 [Source:VGNC Symbol;Acc:VGNC:96292]
ENSSSCG00000007453	Upregulated	218755	17	+	48966814	49243747	TCONS_00096938	13	2142	XLOC_026586	EYA2	EYA transcriptional coactivator and phosphatase 2 [Source:VGNC Symbol;Acc:VGNC:96292]
ENSSSCG00000007453	Upregulated	218756	17	+	48966814	49243747	TCONS_00096939	18	2760	XLOC_026586	EYA2	EYA transcriptional coactivator and phosphatase 2 [Source:VGNC Symbol;Acc:VGNC:96292]
ENSSSCG00000007453	Upregulated	218757	17	-	48966920	49243729	TCONS_00100598	16	2352	XLOC_027597	EYA2	EYA transcriptional coactivator and phosphatase 2 [Source:VGNC Symbol;Acc:VGNC:96292]
ENSSSCG00000007453	Upregulated	218758	17	-	48966920	49243729	TCONS_00100599	15	2237	XLOC_027597	EYA2	EYA transcriptional coactivator and phosphatase 2 [Source:VGNC Symbol;Acc:VGNC:96292]
ENSSSCG00000007453	Upregulated	218759	17	-	49018450	49243729	TCONS_00100600	16	2348	XLOC_027597	EYA2	EYA transcriptional coactivator and phosphatase 2 [Source:VGNC Symbol;Acc:VGNC:96292]
ENSSSCG00000007453	Upregulated	218760	17	-	49028437	49243729	TCONS_00100601	15	2248	XLOC_027597	EYA2	EYA transcriptional coactivator and phosphatase 2 [Source:VGNC Symbol;Acc:VGNC:96292]
ENSSSCG00000007453	Upregulated	218761	17	-	49028437	49243729	TCONS_00100602	16	2332	XLOC_027597	EYA2	EYA transcriptional coactivator and phosphatase 2 [Source:VGNC Symbol;Acc:VGNC:96292]
ENSSSCG00000007453	Upregulated	218762	17	-	49028486	49243729	TCONS_00100603	16	2527	XLOC_027597	EYA2	EYA transcriptional coactivator and phosphatase 2 [Source:VGNC Symbol;Acc:VGNC:96292]
ENSSSCG00000007453	Upregulated	218763	17	-	49155939	49243729	TCONS_00100604	7	1330	XLOC_027597	EYA2	EYA transcriptional coactivator and phosphatase 2 [Source:VGNC Symbol;Acc:VGNC:96292]
ENSSSCG00000007453	Upregulated	218764	17	-	49193035	49243729	TCONS_00100605	8	1496	XLOC_027597	EYA2	EYA transcriptional coactivator and phosphatase 2 [Source:VGNC Symbol;Acc:VGNC:96292]
ENSSSCG00000051637	Upregulated	143067	10	-	19321285	19359474	TCONS_00026495	6	10549	XLOC_007478	ENSSSCG00000051637
ENSSSCG00000051637	Upregulated	143068	10	-	19321285	19373041	TCONS_00026496	11	7378	XLOC_007478	ENSSSCG00000051637
ENSSSCG00000051637	Upregulated	143069	10	-	19321285	19374657	TCONS_00026497	12	7398	XLOC_007478	ENSSSCG00000051637
ENSSSCG00000051637	Upregulated	143070	10	-	19321285	19375045	TCONS_00026498	14	7719	XLOC_007478	ENSSSCG00000051637
ENSSSCG00000051637	Upregulated	143071	10	-	19321285	19375097	TCONS_00026499	14	7771	XLOC_007478	ENSSSCG00000051637
ENSSSCG00000051637	Upregulated	143072	10	-	19321285	19381763	TCONS_00026500	14	7714	XLOC_007478	ENSSSCG00000051637
ENSSSCG00000051637	Upregulated	143073	10	-	19321285	19387432	TCONS_00026501	15	7793	XLOC_007478	ENSSSCG00000051637
ENSSSCG00000051637	Upregulated	143074	10	-	19321285	19387445	TCONS_00026502	12	7412	XLOC_007478	ENSSSCG00000051637
ENSSSCG00000051637	Upregulated	143075	10	-	19321285	19387466	TCONS_00026503	15	7812	XLOC_007478	ENSSSCG00000051637
ENSSSCG00000051637	Upregulated	143076	10	+	19321331	19364091	TCONS_00023066	6	6534	XLOC_006454	ENSSSCG00000051637
ENSSSCG00000051637	Upregulated	143089	10	-	19325133	19387434	TCONS_00026504	13	3983	XLOC_007478	ENSSSCG00000051637
ENSSSCG00000051637	Upregulated	143090	10	-	19325133	19387466	TCONS_00026505	15	4299	XLOC_007478	ENSSSCG00000051637
ENSSSCG00000051637	Upregulated	143095	10	-	19352719	19363861	TCONS_00026506	4	2364	XLOC_007478	ENSSSCG00000051637
ENSSSCG00000051637	Upregulated	143096	10	-	19352719	19386478	TCONS_00026507	7	3195	XLOC_007478	ENSSSCG00000051637
ENSSSCG00000051637	Upregulated	143097	10	-	19353026	19373036	TCONS_00026508	7	3227	XLOC_007478	ENSSSCG00000051637
ENSSSCG00000051637	Upregulated	143098	10	-	19353026	19374674	TCONS_00026509	8	3147	XLOC_007478	ENSSSCG00000051637
ENSSSCG00000051637	Upregulated	143099	10	-	19353026	19386478	TCONS_00026510	6	2991	XLOC_007478	ENSSSCG00000051637
ENSSSCG00000051637	Upregulated	143100	10	-	19353123	19359474	TCONS_00026511	2	6306	XLOC_007478	ENSSSCG00000051637
ENSSSCG00000008115	Upregulated	50092	3	-	46143138	46238329	TCONS_00138749	2	1436	XLOC_037646	MAL	mal, T cell differentiation protein [Source:HGNC Symbol;Acc:HGNC:6817]
ENSSSCG00000008115	Upregulated	50097	3	-	46181555	46196708	TCONS_00138750	4	1234	XLOC_037647	MAL	mal, T cell differentiation protein [Source:HGNC Symbol;Acc:HGNC:6817]
ENSSSCG00000008115	Upregulated	50098	3	-	46181555	46241893	TCONS_00138751	4	1175	XLOC_037647	MAL	mal, T cell differentiation protein [Source:HGNC Symbol;Acc:HGNC:6817]
ENSSSCG00000008115	Upregulated	50099	3	+	46181653	46186087	TCONS_00130536	3	765	XLOC_035513	MAL	mal, T cell differentiation protein [Source:HGNC Symbol;Acc:HGNC:6817]
ENSSSCG00000008115	Upregulated	50100	3	-	46182702	46224970	TCONS_00138752	2	233	XLOC_037648	MAL	mal, T cell differentiation protein [Source:HGNC Symbol;Acc:HGNC:6817]
ENSSSCG00000008115	Upregulated	50102	3	-	46223611	46234227	TCONS_00138753	4	4572	XLOC_037647	MAL	mal, T cell differentiation protein [Source:HGNC Symbol;Acc:HGNC:6817]
ENSSSCG00000008115	Upregulated	50103	3	-	46223611	46241761	TCONS_00138754	3	941	XLOC_037647	MAL	mal, T cell differentiation protein [Source:HGNC Symbol;Acc:HGNC:6817]
ENSSSCG00000008115	Upregulated	50104	3	-	46223611	46242047	TCONS_00138755	4	1353	XLOC_037647	MAL	mal, T cell differentiation protein [Source:HGNC Symbol;Acc:HGNC:6817]
ENSSSCG00000008115	Upregulated	50105	3	-	46223614	46241674	TCONS_00138756	3	809	XLOC_037647	MAL	mal, T cell differentiation protein [Source:HGNC Symbol;Acc:HGNC:6817]
ENSSSCG00000008115	Upregulated	50106	3	-	46223614	46242047	TCONS_00138757	4	1350	XLOC_037647	MAL	mal, T cell differentiation protein [Source:HGNC Symbol;Acc:HGNC:6817]
ENSSSCG00000008115	Upregulated	50107	3	+	46223659	46229231	TCONS_00130538	3	728	XLOC_035515	MAL	mal, T cell differentiation protein [Source:HGNC Symbol;Acc:HGNC:6817]
ENSSSCG00000008115	Upregulated	50108	3	+	46223659	46234377	TCONS_00130539	4	4674	XLOC_035515	MAL	mal, T cell differentiation protein [Source:HGNC Symbol;Acc:HGNC:6817]
ENSSSCG00000008115	Upregulated	50109	3	+	46223659	46241668	TCONS_00130540	4	926	XLOC_035515	MAL	mal, T cell differentiation protein [Source:HGNC Symbol;Acc:HGNC:6817]
ENSSSCG00000008115	Upregulated	50110	3	+	46223659	46241668	TCONS_00130541	4	926	XLOC_035515	MAL	mal, T cell differentiation protein [Source:HGNC Symbol;Acc:HGNC:6817]
ENSSSCG00000008115	Upregulated	50111	3	+	46223659	46321034	TCONS_00130542	5	2916	XLOC_035515	MAL	mal, T cell differentiation protein [Source:HGNC Symbol;Acc:HGNC:6817]
ENSSSCG00000040411	Upregulated	212505	16	+	71680074	71821924	TCONS_00091128	6	7122	XLOC_024886	CCDC69	coiled-coil domain containing 69 [Source:VGNC Symbol;Acc:VGNC:86309]
ENSSSCG00000040411	Upregulated	212520	16	+	71763256	71821924	TCONS_00091136	9	5206	XLOC_024886	CCDC69	coiled-coil domain containing 69 [Source:VGNC Symbol;Acc:VGNC:86309]
ENSSSCG00000040411	Upregulated	212530	16	+	71774477	71821924	TCONS_00091142	9	5206	XLOC_024886	CCDC69	coiled-coil domain containing 69 [Source:VGNC Symbol;Acc:VGNC:86309]
ENSSSCG00000040411	Upregulated	212532	16	+	71778456	71821924	TCONS_00091143	11	5866	XLOC_024886	CCDC69	coiled-coil domain containing 69 [Source:VGNC Symbol;Acc:VGNC:86309]
ENSSSCG00000040411	Upregulated	212533	16	+	71778456	71821924	TCONS_00091144	9	5310	XLOC_024886	CCDC69	coiled-coil domain containing 69 [Source:VGNC Symbol;Acc:VGNC:86309]
ENSSSCG00000040411	Upregulated	212534	16	+	71778456	71821924	TCONS_00091145	11	5866	XLOC_024886	CCDC69	coiled-coil domain containing 69 [Source:VGNC Symbol;Acc:VGNC:86309]
ENSSSCG00000040411	Upregulated	212535	16	+	71778456	71821924	TCONS_00091146	11	5866	XLOC_024886	CCDC69	coiled-coil domain containing 69 [Source:VGNC Symbol;Acc:VGNC:86309]
ENSSSCG00000040411	Upregulated	212536	16	+	71796804	71820828	TCONS_00091147	7	6353	XLOC_024886	CCDC69	coiled-coil domain containing 69 [Source:VGNC Symbol;Acc:VGNC:86309]
ENSSSCG00000040411	Upregulated	212537	16	+	71796804	71821924	TCONS_00091148	7	7449	XLOC_024886	CCDC69	coiled-coil domain containing 69 [Source:VGNC Symbol;Acc:VGNC:86309]
ENSSSCG00000040411	Upregulated	212538	16	+	71810199	71821924	TCONS_00091149	6	4932	XLOC_024886	CCDC69	coiled-coil domain containing 69 [Source:VGNC Symbol;Acc:VGNC:86309]
ENSSSCG00000040411	Upregulated	212539	16	-	71810221	71818855	TCONS_00093761	6	1841	XLOC_025674	CCDC69	coiled-coil domain containing 69 [Source:VGNC Symbol;Acc:VGNC:86309]
ENSSSCG00000010036	Upregulated	188833	14	+	48566343	48705841	TCONS_00066896	16	3855	XLOC_018284	SLC5A1	solute carrier family 5 member 1 [Source:VGNC Symbol;Acc:VGNC:93140]
ENSSSCG00000010036	Upregulated	188838	14	-	48627919	48704101	TCONS_00074292	13	3944	XLOC_020121	SLC5A1	solute carrier family 5 member 1 [Source:VGNC Symbol;Acc:VGNC:93140]
ENSSSCG00000010036	Upregulated	188839	14	-	48627919	48704235	TCONS_00074293	15	4243	XLOC_020121	SLC5A1	solute carrier family 5 member 1 [Source:VGNC Symbol;Acc:VGNC:93140]
ENSSSCG00000010036	Upregulated	188840	14	+	48628019	48705841	TCONS_00066897	16	4041	XLOC_018284	SLC5A1	solute carrier family 5 member 1 [Source:VGNC Symbol;Acc:VGNC:93140]
ENSSSCG00000010036	Upregulated	188841	14	+	48628085	48705841	TCONS_00066898	13	3510	XLOC_018284	SLC5A1	solute carrier family 5 member 1 [Source:VGNC Symbol;Acc:VGNC:93140]
ENSSSCG00000010036	Upregulated	188842	14	+	48628090	48705841	TCONS_00066899	14	3753	XLOC_018284	SLC5A1	solute carrier family 5 member 1 [Source:VGNC Symbol;Acc:VGNC:93140]
ENSSSCG00000010036	Upregulated	188843	14	+	48628093	48705841	TCONS_00066900	12	3421	XLOC_018284	SLC5A1	solute carrier family 5 member 1 [Source:VGNC Symbol;Acc:VGNC:93140]
ENSSSCG00000010036	Upregulated	188844	14	+	48628107	48705841	TCONS_00066901	13	3488	XLOC_018284	SLC5A1	solute carrier family 5 member 1 [Source:VGNC Symbol;Acc:VGNC:93140]
ENSSSCG00000010036	Upregulated	188845	14	+	48628144	48705841	TCONS_00066902	15	3844	XLOC_018284	SLC5A1	solute carrier family 5 member 1 [Source:VGNC Symbol;Acc:VGNC:93140]
ENSSSCG00000010036	Upregulated	188846	14	+	48628144	48705841	TCONS_00066903	16	3922	XLOC_018284	SLC5A1	solute carrier family 5 member 1 [Source:VGNC Symbol;Acc:VGNC:93140]
ENSSSCG00000010036	Upregulated	188847	14	+	48628224	48705841	TCONS_00066904	17	3926	XLOC_018284	SLC5A1	solute carrier family 5 member 1 [Source:VGNC Symbol;Acc:VGNC:93140]
ENSSSCG00000010036	Upregulated	188848	14	+	48628224	48705841	TCONS_00066905	17	3920	XLOC_018284	SLC5A1	solute carrier family 5 member 1 [Source:VGNC Symbol;Acc:VGNC:93140]
ENSSSCG00000010036	Upregulated	188849	14	+	48629684	48702296	TCONS_00066906	15	5688	XLOC_018284	SLC5A1	solute carrier family 5 member 1 [Source:VGNC Symbol;Acc:VGNC:93140]
ENSSSCG00000010036	Upregulated	188850	14	+	48629684	48705841	TCONS_00066907	16	7525	XLOC_018284	SLC5A1	solute carrier family 5 member 1 [Source:VGNC Symbol;Acc:VGNC:93140]
ENSSSCG00000010036	Upregulated	188851	14	-	48633659	48704085	TCONS_00074294	14	3561	XLOC_020121	SLC5A1	solute carrier family 5 member 1 [Source:VGNC Symbol;Acc:VGNC:93140]
ENSSSCG00000010036	Upregulated	188852	14	-	48685167	48704094	TCONS_00074295	5	2536	XLOC_020121	SLC5A1	solute carrier family 5 member 1 [Source:VGNC Symbol;Acc:VGNC:93140]
ENSSSCG00000010036	Upregulated	188853	14	-	48689607	48704235	TCONS_00074296	3	2258	XLOC_020121	SLC5A1	solute carrier family 5 member 1 [Source:VGNC Symbol;Acc:VGNC:93140]
ENSSSCG00000004433	Upregulated	5864	1	-	79955657	80243797	TCONS_00013934	5	3324	XLOC_003969	HS3ST5	heparan sulfate-glucosamine 3-sulfotransferase 5 [Source:VGNC Symbol;Acc:VGNC:88979]
ENSSSCG00000004433	Upregulated	5865	1	-	79955657	80243797	TCONS_00013935	5	3320	XLOC_003969	HS3ST5	heparan sulfate-glucosamine 3-sulfotransferase 5 [Source:VGNC Symbol;Acc:VGNC:88979]
ENSSSCG00000004433	Upregulated	5866	1	-	79955657	80243797	TCONS_00013936	6	3352	XLOC_003969	HS3ST5	heparan sulfate-glucosamine 3-sulfotransferase 5 [Source:VGNC Symbol;Acc:VGNC:88979]
ENSSSCG00000004433	Upregulated	5867	1	+	79956576	79971107	TCONS_00002871	3	1834	XLOC_000900	HS3ST5	heparan sulfate-glucosamine 3-sulfotransferase 5 [Source:VGNC Symbol;Acc:VGNC:88979]
ENSSSCG00000004433	Upregulated	5868	1	+	79956576	80078401	TCONS_00002872	3	1886	XLOC_000900	HS3ST5	heparan sulfate-glucosamine 3-sulfotransferase 5 [Source:VGNC Symbol;Acc:VGNC:88979]
ENSSSCG00000004433	Upregulated	5869	1	+	79956576	80244446	TCONS_00002873	5	2113	XLOC_000900	HS3ST5	heparan sulfate-glucosamine 3-sulfotransferase 5 [Source:VGNC Symbol;Acc:VGNC:88979]
ENSSSCG00000006912	Upregulated	71168	4	+	125522317	125606882	TCONS_00149327	39	5018	XLOC_040519	HFM1	helicase for meiosis 1 [Source:VGNC Symbol;Acc:VGNC:88867]
ENSSSCG00000006912	Upregulated	71169	4	+	125522317	125607001	TCONS_00149328	35	5770	XLOC_040519	HFM1	helicase for meiosis 1 [Source:VGNC Symbol;Acc:VGNC:88867]
ENSSSCG00000006912	Upregulated	71170	4	+	125522334	125606882	TCONS_00149329	38	4888	XLOC_040519	HFM1	helicase for meiosis 1 [Source:VGNC Symbol;Acc:VGNC:88867]
ENSSSCG00000006912	Upregulated	71171	4	-	125573349	125605493	TCONS_00156016	16	1870	XLOC_042278	HFM1	helicase for meiosis 1 [Source:VGNC Symbol;Acc:VGNC:88867]
ENSSSCG00000006912	Upregulated	71172	4	-	125573349	125606339	TCONS_00156017	13	1577	XLOC_042278	HFM1	helicase for meiosis 1 [Source:VGNC Symbol;Acc:VGNC:88867]
ENSSSCG00000006912	Upregulated	71173	4	-	125573349	125606407	TCONS_00156018	13	1648	XLOC_042278	HFM1	helicase for meiosis 1 [Source:VGNC Symbol;Acc:VGNC:88867]
ENSSSCG00000006912	Upregulated	71174	4	-	125573349	125606539	TCONS_00156019	13	1773	XLOC_042278	HFM1	helicase for meiosis 1 [Source:VGNC Symbol;Acc:VGNC:88867]
ENSSSCG00000006912	Upregulated	71175	4	-	125573349	125606789	TCONS_00156020	12	1939	XLOC_042278	HFM1	helicase for meiosis 1 [Source:VGNC Symbol;Acc:VGNC:88867]
ENSSSCG00000006912	Upregulated	71176	4	-	125573349	125606823	TCONS_00156021	11	2901	XLOC_042278	HFM1	helicase for meiosis 1 [Source:VGNC Symbol;Acc:VGNC:88867]
ENSSSCG00000006912	Upregulated	71177	4	-	125573349	125609538	TCONS_00156022	12	4829	XLOC_042278	HFM1	helicase for meiosis 1 [Source:VGNC Symbol;Acc:VGNC:88867]
ENSSSCG00000006912	Upregulated	71178	4	+	125573377	125609577	TCONS_00149330	15	4586	XLOC_040519	HFM1	helicase for meiosis 1 [Source:VGNC Symbol;Acc:VGNC:88867]
ENSSSCG00000006912	Upregulated	71179	4	+	125573380	125609577	TCONS_00149331	17	4767	XLOC_040519	HFM1	helicase for meiosis 1 [Source:VGNC Symbol;Acc:VGNC:88867]
ENSSSCG00000006912	Upregulated	71180	4	+	125573521	125607001	TCONS_00149332	17	2467	XLOC_040519	HFM1	helicase for meiosis 1 [Source:VGNC Symbol;Acc:VGNC:88867]
ENSSSCG00000006912	Upregulated	71181	4	-	125580742	125606675	TCONS_00156023	16	2055	XLOC_042278	HFM1	helicase for meiosis 1 [Source:VGNC Symbol;Acc:VGNC:88867]
ENSSSCG00000006912	Upregulated	71182	4	-	125583572	125605838	TCONS_00156024	13	1795	XLOC_042278	HFM1	helicase for meiosis 1 [Source:VGNC Symbol;Acc:VGNC:88867]
ENSSSCG00000005494	Upregulated	19674	1	-	255532449	255630161	TCONS_00020854	26	7383	XLOC_005787	TNC	tenascin C [Source:VGNC Symbol;Acc:VGNC:103192]
ENSSSCG00000005494	Upregulated	19675	1	-	255532449	255630377	TCONS_00020855	30	8694	XLOC_005787	TNC	tenascin C [Source:VGNC Symbol;Acc:VGNC:103192]
ENSSSCG00000005494	Upregulated	19676	1	-	255532449	255630377	TCONS_00020856	26	7599	XLOC_005787	TNC	tenascin C [Source:VGNC Symbol;Acc:VGNC:103192]
ENSSSCG00000005494	Upregulated	19677	1	-	255532449	255630377	TCONS_00020857	25	7659	XLOC_005787	TNC	tenascin C [Source:VGNC Symbol;Acc:VGNC:103192]
ENSSSCG00000005494	Upregulated	19678	1	-	255532449	255630377	TCONS_00020858	29	8450	XLOC_005787	TNC	tenascin C [Source:VGNC Symbol;Acc:VGNC:103192]
ENSSSCG00000005494	Upregulated	19679	1	-	255532449	255630377	TCONS_00020859	27	8205	XLOC_005787	TNC	tenascin C [Source:VGNC Symbol;Acc:VGNC:103192]
ENSSSCG00000005494	Upregulated	19680	1	-	255532449	255630377	TCONS_00020860	26	7935	XLOC_005787	TNC	tenascin C [Source:VGNC Symbol;Acc:VGNC:103192]
ENSSSCG00000005494	Upregulated	19681	1	-	255532449	255630377	TCONS_00020861	29	8754	XLOC_005787	TNC	tenascin C [Source:VGNC Symbol;Acc:VGNC:103192]
ENSSSCG00000005494	Upregulated	19682	1	-	255532449	255630377	TCONS_00020862	27	8205	XLOC_005787	TNC	tenascin C [Source:VGNC Symbol;Acc:VGNC:103192]
ENSSSCG00000005494	Upregulated	19683	1	-	255532449	255630377	TCONS_00020863	28	8481	XLOC_005787	TNC	tenascin C [Source:VGNC Symbol;Acc:VGNC:103192]
ENSSSCG00000005494	Upregulated	19684	1	-	255532449	255630377	TCONS_00020864	28	8478	XLOC_005787	TNC	tenascin C [Source:VGNC Symbol;Acc:VGNC:103192]
ENSSSCG00000005494	Upregulated	19685	1	-	255532449	255630377	TCONS_00020865	28	8481	XLOC_005787	TNC	tenascin C [Source:VGNC Symbol;Acc:VGNC:103192]
ENSSSCG00000005494	Upregulated	19686	1	-	255532449	255630377	TCONS_00020866	26	7932	XLOC_005787	TNC	tenascin C [Source:VGNC Symbol;Acc:VGNC:103192]
ENSSSCG00000005494	Upregulated	19687	1	-	255533236	255630375	TCONS_00020867	30	7905	XLOC_005787	TNC	tenascin C [Source:VGNC Symbol;Acc:VGNC:103192]
ENSSSCG00000005494	Upregulated	19688	1	-	255533236	255630375	TCONS_00020868	26	7143	XLOC_005787	TNC	tenascin C [Source:VGNC Symbol;Acc:VGNC:103192]
ENSSSCG00000005494	Upregulated	19689	1	-	255533236	255630375	TCONS_00020869	26	7146	XLOC_005787	TNC	tenascin C [Source:VGNC Symbol;Acc:VGNC:103192]
ENSSSCG00000005494	Upregulated	19690	1	-	255533236	255630375	TCONS_00020870	29	7965	XLOC_005787	TNC	tenascin C [Source:VGNC Symbol;Acc:VGNC:103192]
ENSSSCG00000005494	Upregulated	19691	1	-	255533236	255630375	TCONS_00020871	28	7692	XLOC_005787	TNC	tenascin C [Source:VGNC Symbol;Acc:VGNC:103192]
ENSSSCG00000005494	Upregulated	19692	1	-	255533236	255630375	TCONS_00020872	28	7692	XLOC_005787	TNC	tenascin C [Source:VGNC Symbol;Acc:VGNC:103192]
ENSSSCG00000005494	Upregulated	19693	1	-	255533239	255630376	TCONS_00020873	27	7414	XLOC_005787	TNC	tenascin C [Source:VGNC Symbol;Acc:VGNC:103192]
ENSSSCG00000005494	Upregulated	19694	1	-	255533239	255630376	TCONS_00020874	26	6946	XLOC_005787	TNC	tenascin C [Source:VGNC Symbol;Acc:VGNC:103192]
ENSSSCG00000005494	Upregulated	19695	1	-	255533239	255630377	TCONS_00020875	28	7688	XLOC_005787	TNC	tenascin C [Source:VGNC Symbol;Acc:VGNC:103192]
ENSSSCG00000005494	Upregulated	19696	1	+	255533271	255596421	TCONS_00009709	20	3984	XLOC_002748	TNC	tenascin C [Source:VGNC Symbol;Acc:VGNC:103192]
ENSSSCG00000005494	Upregulated	19697	1	+	255533277	255572797	TCONS_00009710	14	2855	XLOC_002748	TNC	tenascin C [Source:VGNC Symbol;Acc:VGNC:103192]
ENSSSCG00000005494	Upregulated	19698	1	+	255533277	255596421	TCONS_00009711	19	3705	XLOC_002748	TNC	tenascin C [Source:VGNC Symbol;Acc:VGNC:103192]
ENSSSCG00000005494	Upregulated	19699	1	+	255533285	255547478	TCONS_00009712	7	1392	XLOC_002748	TNC	tenascin C [Source:VGNC Symbol;Acc:VGNC:103192]
ENSSSCG00000005494	Upregulated	19700	1	+	255533285	255552914	TCONS_00009713	10	1799	XLOC_002748	TNC	tenascin C [Source:VGNC Symbol;Acc:VGNC:103192]
ENSSSCG00000005494	Upregulated	19701	1	+	255533285	255552914	TCONS_00009714	10	1799	XLOC_002748	TNC	tenascin C [Source:VGNC Symbol;Acc:VGNC:103192]
ENSSSCG00000005494	Upregulated	19702	1	+	255533285	255577698	TCONS_00009715	15	2929	XLOC_002748	TNC	tenascin C [Source:VGNC Symbol;Acc:VGNC:103192]
ENSSSCG00000005494	Upregulated	19703	1	+	255533285	255584778	TCONS_00009716	13	2357	XLOC_002748	TNC	tenascin C [Source:VGNC Symbol;Acc:VGNC:103192]
ENSSSCG00000004678	Upregulated	9245	1	+	126620477	126641419	TCONS_00004573	33	6396	XLOC_001304	DUOX2	dual oxidase 2 [Source:VGNC Symbol;Acc:VGNC:103086]
ENSSSCG00000004678	Upregulated	9246	1	+	126620510	126641406	TCONS_00004574	33	6067	XLOC_001304	DUOX2	dual oxidase 2 [Source:VGNC Symbol;Acc:VGNC:103086]
ENSSSCG00000004678	Upregulated	9247	1	+	126620510	126641406	TCONS_00004575	32	5818	XLOC_001304	DUOX2	dual oxidase 2 [Source:VGNC Symbol;Acc:VGNC:103086]
ENSSSCG00000002737	Upregulated	85991	6	+	14535863	14549890	TCONS_00169489	2	7206	XLOC_046042	CHST4	carbohydrate sulfotransferase 4 [Source:VGNC Symbol;Acc:VGNC:86680]
ENSSSCG00000002737	Upregulated	85992	6	+	14535863	14550020	TCONS_00169490	3	7465	XLOC_046042	CHST4	carbohydrate sulfotransferase 4 [Source:VGNC Symbol;Acc:VGNC:86680]
ENSSSCG00000002737	Upregulated	85993	6	+	14535891	14544437	TCONS_00169491	3	1854	XLOC_046042	CHST4	carbohydrate sulfotransferase 4 [Source:VGNC Symbol;Acc:VGNC:86680]
ENSSSCG00000002737	Upregulated	85994	6	-	14536038	14546826	TCONS_00180182	2	3967	XLOC_048794	CHST4	carbohydrate sulfotransferase 4 [Source:VGNC Symbol;Acc:VGNC:86680]
ENSSSCG00000002737	Upregulated	85995	6	-	14548562	14549121	TCONS_00180183	1	560	XLOC_048795	CHST4	carbohydrate sulfotransferase 4 [Source:VGNC Symbol;Acc:VGNC:86680]
ENSSSCG00000004012	Upregulated	191	1	+	855030	882181	TCONS_00000104	21	5390	XLOC_000029	THBS2	thrombospondin 2 [Source:VGNC Symbol;Acc:VGNC:93947]
ENSSSCG00000004012	Upregulated	192	1	+	855281	882465	TCONS_00000105	22	5513	XLOC_000029	THBS2	thrombospondin 2 [Source:VGNC Symbol;Acc:VGNC:93947]
ENSSSCG00000004012	Upregulated	193	1	+	855389	882465	TCONS_00000106	21	6800	XLOC_000029	THBS2	thrombospondin 2 [Source:VGNC Symbol;Acc:VGNC:93947]
ENSSSCG00000004012	Upregulated	194	1	+	855389	882473	TCONS_00000107	23	5710	XLOC_000029	THBS2	thrombospondin 2 [Source:VGNC Symbol;Acc:VGNC:93947]
ENSSSCG00000004012	Upregulated	195	1	+	855389	882473	TCONS_00000108	23	5729	XLOC_000029	THBS2	thrombospondin 2 [Source:VGNC Symbol;Acc:VGNC:93947]
ENSSSCG00000004012	Upregulated	196	1	+	857288	882179	TCONS_00000109	22	5307	XLOC_000029	THBS2	thrombospondin 2 [Source:VGNC Symbol;Acc:VGNC:93947]
ENSSSCG00000004012	Upregulated	197	1	+	857563	882183	TCONS_00000110	22	5241	XLOC_000029	THBS2	thrombospondin 2 [Source:VGNC Symbol;Acc:VGNC:93947]
ENSSSCG00000004012	Upregulated	198	1	-	868757	882449	TCONS_00011046	13	3892	XLOC_003050	THBS2	thrombospondin 2 [Source:VGNC Symbol;Acc:VGNC:93947]
ENSSSCG00000004012	Upregulated	199	1	-	869748	882439	TCONS_00011047	12	3327	XLOC_003050	THBS2	thrombospondin 2 [Source:VGNC Symbol;Acc:VGNC:93947]
ENSSSCG00000004012	Upregulated	200	1	+	873839	882473	TCONS_00000111	7	3236	XLOC_000029	THBS2	thrombospondin 2 [Source:VGNC Symbol;Acc:VGNC:93947]
ENSSSCG00000004012	Upregulated	201	1	+	875779	882473	TCONS_00000112	5	2591	XLOC_000029	THBS2	thrombospondin 2 [Source:VGNC Symbol;Acc:VGNC:93947]
ENSSSCG00000004012	Upregulated	202	1	-	875953	882415	TCONS_00011048	5	2583	XLOC_003050	THBS2	thrombospondin 2 [Source:VGNC Symbol;Acc:VGNC:93947]
ENSSSCG00000004012	Upregulated	203	1	+	876270	882473	TCONS_00000113	5	2412	XLOC_000029	THBS2	thrombospondin 2 [Source:VGNC Symbol;Acc:VGNC:93947]
ENSSSCG00000035689	Upregulated	229982	X	-	59967528	60120021	TCONS_00236665	5	8130	XLOC_065483	NEXMIF	neurite extension and migration factor [Source:VGNC Symbol;Acc:VGNC:90703]
ENSSSCG00000035689	Upregulated	229984	X	+	59967604	59972498	TCONS_00232748	1	4895	XLOC_064336	NEXMIF	neurite extension and migration factor [Source:VGNC Symbol;Acc:VGNC:90703]
ENSSSCG00000035689	Upregulated	229985	X	-	59967635	60120021	TCONS_00236667	5	10828	XLOC_065483	NEXMIF	neurite extension and migration factor [Source:VGNC Symbol;Acc:VGNC:90703]
ENSSSCG00000016703	Upregulated	224569	18	+	45417203	45432897	TCONS_00103443	7	6619	XLOC_028434	HOXA5	homeobox A5 [Source:VGNC Symbol;Acc:VGNC:88939]
ENSSSCG00000016703	Upregulated	224571	18	+	45421636	45425673	TCONS_00103444	3	2492	XLOC_028434	HOXA5	homeobox A5 [Source:VGNC Symbol;Acc:VGNC:88939]
ENSSSCG00000016703	Upregulated	224572	18	+	45421663	45432885	TCONS_00103445	4	6070	XLOC_028434	HOXA5	homeobox A5 [Source:VGNC Symbol;Acc:VGNC:88939]
ENSSSCG00000016703	Upregulated	224573	18	+	45421663	45432897	TCONS_00103446	5	5927	XLOC_028434	HOXA5	homeobox A5 [Source:VGNC Symbol;Acc:VGNC:88939]
ENSSSCG00000016703	Upregulated	224574	18	-	45423149	45425652	TCONS_00106138	1	2504	XLOC_029197	HOXA5	homeobox A5 [Source:VGNC Symbol;Acc:VGNC:88939]
ENSSSCG00000016703	Upregulated	224575	18	-	45428760	45429920	TCONS_00106139	1	1161	XLOC_029198	HOXA5	homeobox A5 [Source:VGNC Symbol;Acc:VGNC:88939]
ENSSSCG00000016703	Upregulated	224576	18	-	45430663	45432880	TCONS_00106140	2	1205	XLOC_029199	HOXA5	homeobox A5 [Source:VGNC Symbol;Acc:VGNC:88939]
ENSSSCG00000026780	Upregulated	37036	2	-	91903147	92132335	TCONS_00123952	5	509	XLOC_033746	EDIL3	EGF like repeats and discoidin domains 3 [Source:VGNC Symbol;Acc:VGNC:99642]
ENSSSCG00000026780	Upregulated	37037	2	-	91903147	92554262	TCONS_00123953	14	3823	XLOC_033746	EDIL3	EGF like repeats and discoidin domains 3 [Source:VGNC Symbol;Acc:VGNC:99642]
ENSSSCG00000026780	Upregulated	37038	2	+	91903170	92125584	TCONS_00114013	5	955	XLOC_031163	EDIL3	EGF like repeats and discoidin domains 3 [Source:VGNC Symbol;Acc:VGNC:99642]
ENSSSCG00000026780	Upregulated	37039	2	+	91904735	92133157	TCONS_00114014	5	1281	XLOC_031163	EDIL3	EGF like repeats and discoidin domains 3 [Source:VGNC Symbol;Acc:VGNC:99642]
ENSSSCG00000026780	Upregulated	37040	2	+	91904739	92133157	TCONS_00114015	5	1280	XLOC_031163	EDIL3	EGF like repeats and discoidin domains 3 [Source:VGNC Symbol;Acc:VGNC:99642]
ENSSSCG00000026780	Upregulated	37041	2	+	92123268	92554175	TCONS_00114016	10	5289	XLOC_031163	EDIL3	EGF like repeats and discoidin domains 3 [Source:VGNC Symbol;Acc:VGNC:99642]
ENSSSCG00000026780	Upregulated	37042	2	-	92123307	92554262	TCONS_00123954	11	5367	XLOC_033746	EDIL3	EGF like repeats and discoidin domains 3 [Source:VGNC Symbol;Acc:VGNC:99642]
ENSSSCG00000026780	Upregulated	37043	2	-	92123307	92554262	TCONS_00123955	9	5199	XLOC_033746	EDIL3	EGF like repeats and discoidin domains 3 [Source:VGNC Symbol;Acc:VGNC:99642]
ENSSSCG00000026780	Upregulated	37044	2	-	92123345	92554191	TCONS_00123956	10	5228	XLOC_033746	EDIL3	EGF like repeats and discoidin domains 3 [Source:VGNC Symbol;Acc:VGNC:99642]
ENSSSCG00000026780	Upregulated	37045	2	-	92123345	92554262	TCONS_00123957	11	5320	XLOC_033746	EDIL3	EGF like repeats and discoidin domains 3 [Source:VGNC Symbol;Acc:VGNC:99642]
ENSSSCG00000026780	Upregulated	37046	2	-	92123418	92554189	TCONS_00123958	10	5054	XLOC_033746	EDIL3	EGF like repeats and discoidin domains 3 [Source:VGNC Symbol;Acc:VGNC:99642]
ENSSSCG00000006810	Upregulated	69741	4	-	109885116	109908476	TCONS_00155305	4	6613	XLOC_042113	KCNC4	potassium voltage-gated channel subfamily C member 4 [Source:VGNC Symbol;Acc:VGNC:89335]
ENSSSCG00000006810	Upregulated	69742	4	-	109885116	109908476	TCONS_00155306	4	3097	XLOC_042113	KCNC4	potassium voltage-gated channel subfamily C member 4 [Source:VGNC Symbol;Acc:VGNC:89335]
ENSSSCG00000006810	Upregulated	69743	4	-	109885116	109908476	TCONS_00155307	4	6613	XLOC_042113	KCNC4	potassium voltage-gated channel subfamily C member 4 [Source:VGNC Symbol;Acc:VGNC:89335]
ENSSSCG00000006810	Upregulated	69744	4	+	109885170	109892413	TCONS_00148615	2	4625	XLOC_040329	KCNC4	potassium voltage-gated channel subfamily C member 4 [Source:VGNC Symbol;Acc:VGNC:89335]
ENSSSCG00000006810	Upregulated	69745	4	+	109885172	109907718	TCONS_00148616	4	2283	XLOC_040329	KCNC4	potassium voltage-gated channel subfamily C member 4 [Source:VGNC Symbol;Acc:VGNC:89335]
ENSSSCG00000011799	Upregulated	176682	13	+	124426308	124438840	TCONS_00051991	8	1999	XLOC_014362	AHSG	alpha 2-HS glycoprotein [Source:HGNC Symbol;Acc:HGNC:349]
ENSSSCG00000011799	Upregulated	176683	13	+	124426308	124438845	TCONS_00051992	9	1958	XLOC_014362	AHSG	alpha 2-HS glycoprotein [Source:HGNC Symbol;Acc:HGNC:349]
ENSSSCG00000011799	Upregulated	176684	13	+	124431759	124438830	TCONS_00051993	8	1496	XLOC_014362	AHSG	alpha 2-HS glycoprotein [Source:HGNC Symbol;Acc:HGNC:349]
ENSSSCG00000011799	Upregulated	176685	13	-	124431976	124438812	TCONS_00060819	7	1307	XLOC_016637	AHSG	alpha 2-HS glycoprotein [Source:HGNC Symbol;Acc:HGNC:349]
ENSSSCG00000011799	Upregulated	176686	13	-	124433728	124438821	TCONS_00060820	7	1424	XLOC_016637	AHSG	alpha 2-HS glycoprotein [Source:HGNC Symbol;Acc:HGNC:349]
ENSSSCG00000011799	Upregulated	176687	13	+	124433750	124438845	TCONS_00051994	8	1380	XLOC_014362	AHSG	alpha 2-HS glycoprotein [Source:HGNC Symbol;Acc:HGNC:349]
ENSSSCG00000011799	Upregulated	176688	13	-	124434088	124438793	TCONS_00060821	6	1133	XLOC_016637	AHSG	alpha 2-HS glycoprotein [Source:HGNC Symbol;Acc:HGNC:349]
ENSSSCG00000011799	Upregulated	176689	13	+	124436346	124438845	TCONS_00051995	5	998	XLOC_014362	AHSG	alpha 2-HS glycoprotein [Source:HGNC Symbol;Acc:HGNC:349]
ENSSSCG00000008634	Upregulated	57696	3	-	125752001	125825244	TCONS_00142582	27	3868	XLOC_038642	ATP6V1C2	ATPase H+ transporting V1 subunit C2 [Source:VGNC Symbol;Acc:VGNC:85673]
ENSSSCG00000008634	Upregulated	57697	3	-	125752001	125825244	TCONS_00142583	26	4167	XLOC_038642	ATP6V1C2	ATPase H+ transporting V1 subunit C2 [Source:VGNC Symbol;Acc:VGNC:85673]
ENSSSCG00000008634	Upregulated	57698	3	-	125752001	125825244	TCONS_00142584	24	3649	XLOC_038642	ATP6V1C2	ATPase H+ transporting V1 subunit C2 [Source:VGNC Symbol;Acc:VGNC:85673]
ENSSSCG00000008634	Upregulated	57699	3	-	125752001	125825244	TCONS_00142585	27	3868	XLOC_038642	ATP6V1C2	ATPase H+ transporting V1 subunit C2 [Source:VGNC Symbol;Acc:VGNC:85673]
ENSSSCG00000008634	Upregulated	57700	3	-	125752001	125825244	TCONS_00142586	26	3838	XLOC_038642	ATP6V1C2	ATPase H+ transporting V1 subunit C2 [Source:VGNC Symbol;Acc:VGNC:85673]
ENSSSCG00000008634	Upregulated	57701	3	-	125752001	125825668	TCONS_00142587	25	3616	XLOC_038642	ATP6V1C2	ATPase H+ transporting V1 subunit C2 [Source:VGNC Symbol;Acc:VGNC:85673]
ENSSSCG00000008634	Upregulated	57702	3	-	125752001	125825675	TCONS_00142588	26	3778	XLOC_038642	ATP6V1C2	ATPase H+ transporting V1 subunit C2 [Source:VGNC Symbol;Acc:VGNC:85673]
ENSSSCG00000008634	Upregulated	57703	3	-	125752001	125825707	TCONS_00142589	26	3810	XLOC_038642	ATP6V1C2	ATPase H+ transporting V1 subunit C2 [Source:VGNC Symbol;Acc:VGNC:85673]
ENSSSCG00000008634	Upregulated	57715	3	-	125758269	125933245	TCONS_00142590	2	943	XLOC_038643	ATP6V1C2	ATPase H+ transporting V1 subunit C2 [Source:VGNC Symbol;Acc:VGNC:85673]
ENSSSCG00000008634	Upregulated	57716	3	-	125763041	125927654	TCONS_00142591	2	633	XLOC_038644	ATP6V1C2	ATPase H+ transporting V1 subunit C2 [Source:VGNC Symbol;Acc:VGNC:85673]
ENSSSCG00000008634	Upregulated	57717	3	-	125773424	125825244	TCONS_00142592	14	2401	XLOC_038642	ATP6V1C2	ATPase H+ transporting V1 subunit C2 [Source:VGNC Symbol;Acc:VGNC:85673]
ENSSSCG00000008634	Upregulated	57718	3	-	125775100	125825220	TCONS_00142593	14	1868	XLOC_038642	ATP6V1C2	ATPase H+ transporting V1 subunit C2 [Source:VGNC Symbol;Acc:VGNC:85673]
ENSSSCG00000008634	Upregulated	57719	3	-	125775100	125825220	TCONS_00142594	15	1865	XLOC_038642	ATP6V1C2	ATPase H+ transporting V1 subunit C2 [Source:VGNC Symbol;Acc:VGNC:85673]
ENSSSCG00000008634	Upregulated	57720	3	-	125775100	125825220	TCONS_00142595	12	1646	XLOC_038642	ATP6V1C2	ATPase H+ transporting V1 subunit C2 [Source:VGNC Symbol;Acc:VGNC:85673]
ENSSSCG00000008634	Upregulated	57721	3	-	125776967	125825244	TCONS_00142596	11	2110	XLOC_038642	ATP6V1C2	ATPase H+ transporting V1 subunit C2 [Source:VGNC Symbol;Acc:VGNC:85673]
ENSSSCG00000008634	Upregulated	57722	3	+	125777383	125825714	TCONS_00134292	13	1174	XLOC_036540	ATP6V1C2	ATPase H+ transporting V1 subunit C2 [Source:VGNC Symbol;Acc:VGNC:85673]
ENSSSCG00000008634	Upregulated	57723	3	-	125780189	126036519	TCONS_00142597	2	252	XLOC_038645	ATP6V1C2	ATPase H+ transporting V1 subunit C2 [Source:VGNC Symbol;Acc:VGNC:85673]
ENSSSCG00000005457	Upregulated	19164	1	+	251810379	251977920	TCONS_00009451	4	4729	XLOC_002697	LPAR1	lysophosphatidic acid receptor 1 [Source:VGNC Symbol;Acc:VGNC:103117]
ENSSSCG00000005457	Upregulated	19165	1	+	251810379	251978166	TCONS_00009452	4	4629	XLOC_002697	LPAR1	lysophosphatidic acid receptor 1 [Source:VGNC Symbol;Acc:VGNC:103117]
ENSSSCG00000005457	Upregulated	19166	1	+	251810379	251979403	TCONS_00009453	4	5181	XLOC_002697	LPAR1	lysophosphatidic acid receptor 1 [Source:VGNC Symbol;Acc:VGNC:103117]
ENSSSCG00000005457	Upregulated	19167	1	+	251810379	251979403	TCONS_00009454	3	5023	XLOC_002697	LPAR1	lysophosphatidic acid receptor 1 [Source:VGNC Symbol;Acc:VGNC:103117]
ENSSSCG00000005457	Upregulated	19169	1	-	251811584	251977847	TCONS_00020605	4	3279	XLOC_005729	LPAR1	lysophosphatidic acid receptor 1 [Source:VGNC Symbol;Acc:VGNC:103117]
ENSSSCG00000005457	Upregulated	19170	1	-	251811584	251977847	TCONS_00020606	4	3451	XLOC_005729	LPAR1	lysophosphatidic acid receptor 1 [Source:VGNC Symbol;Acc:VGNC:103117]
ENSSSCG00000005457	Upregulated	19171	1	-	251811584	251979159	TCONS_00020607	4	3560	XLOC_005729	LPAR1	lysophosphatidic acid receptor 1 [Source:VGNC Symbol;Acc:VGNC:103117]
ENSSSCG00000005457	Upregulated	19172	1	-	251811584	251979159	TCONS_00020608	4	3732	XLOC_005729	LPAR1	lysophosphatidic acid receptor 1 [Source:VGNC Symbol;Acc:VGNC:103117]
ENSSSCG00000005457	Upregulated	19173	1	-	251811584	251979159	TCONS_00020609	5	3737	XLOC_005729	LPAR1	lysophosphatidic acid receptor 1 [Source:VGNC Symbol;Acc:VGNC:103117]
ENSSSCG00000005457	Upregulated	19174	1	-	251811584	251979191	TCONS_00020610	5	3597	XLOC_005729	LPAR1	lysophosphatidic acid receptor 1 [Source:VGNC Symbol;Acc:VGNC:103117]
ENSSSCG00000005457	Upregulated	19175	1	-	251813315	251977847	TCONS_00020611	4	1548	XLOC_005729	LPAR1	lysophosphatidic acid receptor 1 [Source:VGNC Symbol;Acc:VGNC:103117]
ENSSSCG00000040822	Upregulated	79240	5	+	54839769	54955691	TCONS_00160057	7	7492	XLOC_043393	RERGL	RERG like [Source:VGNC Symbol;Acc:VGNC:92218]
ENSSSCG00000040822	Upregulated	79242	5	+	54840714	54955691	TCONS_00160058	7	7461	XLOC_043393	RERGL	RERG like [Source:VGNC Symbol;Acc:VGNC:92218]
ENSSSCG00000040822	Upregulated	79243	5	+	54841314	54955691	TCONS_00160059	7	7516	XLOC_043393	RERGL	RERG like [Source:VGNC Symbol;Acc:VGNC:92218]
ENSSSCG00000040822	Upregulated	79244	5	+	54842863	54955691	TCONS_00160060	6	7420	XLOC_043393	RERGL	RERG like [Source:VGNC Symbol;Acc:VGNC:92218]
ENSSSCG00000040822	Upregulated	79245	5	+	54847098	54955691	TCONS_00160061	6	7413	XLOC_043393	RERGL	RERG like [Source:VGNC Symbol;Acc:VGNC:92218]
ENSSSCG00000040822	Upregulated	79263	5	-	54939240	54949202	TCONS_00166100	6	948	XLOC_045060	RERGL	RERG like [Source:VGNC Symbol;Acc:VGNC:92218]
ENSSSCG00000040822	Upregulated	79264	5	+	54939244	54955691	TCONS_00160072	6	7433	XLOC_043393	RERGL	RERG like [Source:VGNC Symbol;Acc:VGNC:92218]
ENSSSCG00000040822	Upregulated	79265	5	+	54939886	54955639	TCONS_00160073	6	6308	XLOC_043393	RERGL	RERG like [Source:VGNC Symbol;Acc:VGNC:92218]
ENSSSCG00000040822	Upregulated	79266	5	+	54940259	54955691	TCONS_00160074	5	7810	XLOC_043393	RERGL	RERG like [Source:VGNC Symbol;Acc:VGNC:92218]
ENSSSCG00000040822	Upregulated	79267	5	+	54940384	54951884	TCONS_00160075	5	3878	XLOC_043393	RERGL	RERG like [Source:VGNC Symbol;Acc:VGNC:92218]
ENSSSCG00000040822	Upregulated	79268	5	-	54941108	54949202	TCONS_00166101	4	846	XLOC_045060	RERGL	RERG like [Source:VGNC Symbol;Acc:VGNC:92218]
ENSSSCG00000021656	Upregulated	177978	13	-	135803791	135985205	TCONS_00061448	24	2969	XLOC_016798	ENSSSCG00000021656
ENSSSCG00000021656	Upregulated	177979	13	-	135803791	135985205	TCONS_00061449	24	2996	XLOC_016798	ENSSSCG00000021656
ENSSSCG00000021656	Upregulated	177980	13	-	135803791	135985205	TCONS_00061450	24	2996	XLOC_016798	ENSSSCG00000021656
ENSSSCG00000021656	Upregulated	177981	13	-	135803791	135985205	TCONS_00061451	24	2969	XLOC_016798	ENSSSCG00000021656
ENSSSCG00000021656	Upregulated	177982	13	-	135803791	135985205	TCONS_00061452	24	2969	XLOC_016798	ENSSSCG00000021656
ENSSSCG00000021656	Upregulated	177983	13	-	135803791	136154242	TCONS_00061453	34	4895	XLOC_016798	ENSSSCG00000021656
ENSSSCG00000021656	Upregulated	177984	13	-	135803791	136154242	TCONS_00061454	34	4895	XLOC_016798	ENSSSCG00000021656
ENSSSCG00000021656	Upregulated	177985	13	-	135803791	136154242	TCONS_00061455	34	4922	XLOC_016798	ENSSSCG00000021656
ENSSSCG00000021656	Upregulated	177986	13	-	135803791	136154242	TCONS_00061456	34	4895	XLOC_016798	ENSSSCG00000021656
ENSSSCG00000021656	Upregulated	177987	13	-	135803791	136154242	TCONS_00061457	34	4895	XLOC_016798	ENSSSCG00000021656
ENSSSCG00000021656	Upregulated	177993	13	-	135863098	135985205	TCONS_00061458	24	4345	XLOC_016798	ENSSSCG00000021656
ENSSSCG00000021656	Upregulated	177994	13	-	135863098	135985205	TCONS_00061459	24	4357	XLOC_016798	ENSSSCG00000021656
ENSSSCG00000021656	Upregulated	177995	13	-	135863098	135985205	TCONS_00061460	24	4318	XLOC_016798	ENSSSCG00000021656
ENSSSCG00000021656	Upregulated	177996	13	-	135863098	135985205	TCONS_00061461	24	4318	XLOC_016798	ENSSSCG00000021656
ENSSSCG00000021656	Upregulated	177997	13	-	135863098	135985205	TCONS_00061462	24	4318	XLOC_016798	ENSSSCG00000021656
ENSSSCG00000021656	Upregulated	177998	13	-	135863098	135985205	TCONS_00061463	24	4318	XLOC_016798	ENSSSCG00000021656
ENSSSCG00000021656	Upregulated	177999	13	-	135863098	135985205	TCONS_00061464	24	4318	XLOC_016798	ENSSSCG00000021656
ENSSSCG00000021656	Upregulated	178000	13	-	135863098	135985205	TCONS_00061465	24	4345	XLOC_016798	ENSSSCG00000021656
ENSSSCG00000021656	Upregulated	178001	13	-	135863098	135996639	TCONS_00061466	25	4569	XLOC_016798	ENSSSCG00000021656
ENSSSCG00000021656	Upregulated	178002	13	-	135863098	135999438	TCONS_00061467	25	4588	XLOC_016798	ENSSSCG00000021656
ENSSSCG00000021656	Upregulated	178003	13	-	135863098	136046165	TCONS_00061468	26	4678	XLOC_016798	ENSSSCG00000021656
ENSSSCG00000021656	Upregulated	178004	13	-	135863098	136154242	TCONS_00061469	34	6244	XLOC_016798	ENSSSCG00000021656
ENSSSCG00000021656	Upregulated	178005	13	-	135863098	136154242	TCONS_00061470	34	6205	XLOC_016798	ENSSSCG00000021656
ENSSSCG00000021656	Upregulated	178006	13	-	135863098	136154242	TCONS_00061471	34	6232	XLOC_016798	ENSSSCG00000021656
ENSSSCG00000021656	Upregulated	178007	13	-	135863098	136154242	TCONS_00061472	34	6205	XLOC_016798	ENSSSCG00000021656
ENSSSCG00000021656	Upregulated	178008	13	-	135863098	136154242	TCONS_00061473	34	6244	XLOC_016798	ENSSSCG00000021656
ENSSSCG00000021656	Upregulated	178009	13	-	135863098	136154242	TCONS_00061474	34	6271	XLOC_016798	ENSSSCG00000021656
ENSSSCG00000021656	Upregulated	178010	13	-	135863098	136154242	TCONS_00061475	34	6205	XLOC_016798	ENSSSCG00000021656
ENSSSCG00000021656	Upregulated	178011	13	-	135863098	136154242	TCONS_00061476	34	6244	XLOC_016798	ENSSSCG00000021656
ENSSSCG00000021656	Upregulated	178012	13	-	135863098	136154242	TCONS_00061477	34	6205	XLOC_016798	ENSSSCG00000021656
ENSSSCG00000021656	Upregulated	178013	13	-	135863098	136154242	TCONS_00061478	34	6244	XLOC_016798	ENSSSCG00000021656
ENSSSCG00000021656	Upregulated	178014	13	-	135863098	136346692	TCONS_00061479	34	6260	XLOC_016798	ENSSSCG00000021656
ENSSSCG00000021656	Upregulated	178015	13	+	135864598	135980346	TCONS_00052663	22	2427	XLOC_014515	ENSSSCG00000021656
ENSSSCG00000021656	Upregulated	178016	13	-	135896936	135985205	TCONS_00061480	19	2373	XLOC_016798	ENSSSCG00000021656
ENSSSCG00000033641	Upregulated	98961	6	-	92246055	92257819	TCONS_00186722	3	4304	XLOC_050390	COL8A2	collagen type VIII alpha 2 chain [Source:VGNC Symbol;Acc:VGNC:86881]
ENSSSCG00000033641	Upregulated	98962	6	-	92246055	92258379	TCONS_00186723	3	4280	XLOC_050390	COL8A2	collagen type VIII alpha 2 chain [Source:VGNC Symbol;Acc:VGNC:86881]
ENSSSCG00000033641	Upregulated	98963	6	-	92246055	92271454	TCONS_00186724	5	3009	XLOC_050390	COL8A2	collagen type VIII alpha 2 chain [Source:VGNC Symbol;Acc:VGNC:86881]
ENSSSCG00000033641	Upregulated	98964	6	-	92246055	92271454	TCONS_00186725	3	4206	XLOC_050390	COL8A2	collagen type VIII alpha 2 chain [Source:VGNC Symbol;Acc:VGNC:86881]
ENSSSCG00000033641	Upregulated	98965	6	-	92246459	92271454	TCONS_00186726	4	4023	XLOC_050390	COL8A2	collagen type VIII alpha 2 chain [Source:VGNC Symbol;Acc:VGNC:86881]
ENSSSCG00000023451	Upregulated	140185	9	-	128357160	128659717	TCONS_00225273	7	1797	XLOC_061248	KCNK2	potassium two pore domain channel subfamily K member 2 [Source:VGNC Symbol;Acc:VGNC:89369]
ENSSSCG00000023451	Upregulated	140186	9	-	128429097	128589103	TCONS_00225274	9	4288	XLOC_061248	KCNK2	potassium two pore domain channel subfamily K member 2 [Source:VGNC Symbol;Acc:VGNC:89369]
ENSSSCG00000023451	Upregulated	140187	9	-	128429097	128589103	TCONS_00225275	7	4495	XLOC_061248	KCNK2	potassium two pore domain channel subfamily K member 2 [Source:VGNC Symbol;Acc:VGNC:89369]
ENSSSCG00000023451	Upregulated	140188	9	-	128429097	128589103	TCONS_00225276	8	4801	XLOC_061248	KCNK2	potassium two pore domain channel subfamily K member 2 [Source:VGNC Symbol;Acc:VGNC:89369]
ENSSSCG00000023451	Upregulated	140189	9	-	128429097	128589103	TCONS_00225277	8	4613	XLOC_061248	KCNK2	potassium two pore domain channel subfamily K member 2 [Source:VGNC Symbol;Acc:VGNC:89369]
ENSSSCG00000023451	Upregulated	140190	9	-	128429097	128589103	TCONS_00225278	8	4664	XLOC_061248	KCNK2	potassium two pore domain channel subfamily K member 2 [Source:VGNC Symbol;Acc:VGNC:89369]
ENSSSCG00000023451	Upregulated	140191	9	-	128429097	128589828	TCONS_00225279	8	4830	XLOC_061248	KCNK2	potassium two pore domain channel subfamily K member 2 [Source:VGNC Symbol;Acc:VGNC:89369]
ENSSSCG00000023451	Upregulated	140192	9	-	128429097	128589904	TCONS_00225280	8	4826	XLOC_061248	KCNK2	potassium two pore domain channel subfamily K member 2 [Source:VGNC Symbol;Acc:VGNC:89369]
ENSSSCG00000023451	Upregulated	140193	9	-	128429097	128659717	TCONS_00225281	7	5021	XLOC_061248	KCNK2	potassium two pore domain channel subfamily K member 2 [Source:VGNC Symbol;Acc:VGNC:89369]
ENSSSCG00000023451	Upregulated	140194	9	-	128429111	128589103	TCONS_00225282	8	4650	XLOC_061248	KCNK2	potassium two pore domain channel subfamily K member 2 [Source:VGNC Symbol;Acc:VGNC:89369]
ENSSSCG00000023451	Upregulated	140195	9	+	128429148	128589102	TCONS_00219152	8	4561	XLOC_059476	KCNK2	potassium two pore domain channel subfamily K member 2 [Source:VGNC Symbol;Acc:VGNC:89369]
ENSSSCG00000023451	Upregulated	140196	9	+	128429238	128585002	TCONS_00219153	6	4130	XLOC_059476	KCNK2	potassium two pore domain channel subfamily K member 2 [Source:VGNC Symbol;Acc:VGNC:89369]
ENSSSCG00000023451	Upregulated	140197	9	+	128429238	128588224	TCONS_00219154	6	4307	XLOC_059476	KCNK2	potassium two pore domain channel subfamily K member 2 [Source:VGNC Symbol;Acc:VGNC:89369]
ENSSSCG00000023451	Upregulated	140198	9	+	128429238	128588422	TCONS_00219155	6	4368	XLOC_059476	KCNK2	potassium two pore domain channel subfamily K member 2 [Source:VGNC Symbol;Acc:VGNC:89369]
ENSSSCG00000023451	Upregulated	140199	9	+	128429238	128588422	TCONS_00219156	7	4486	XLOC_059476	KCNK2	potassium two pore domain channel subfamily K member 2 [Source:VGNC Symbol;Acc:VGNC:89369]
ENSSSCG00000023451	Upregulated	140200	9	+	128429238	128589806	TCONS_00219157	7	4444	XLOC_059476	KCNK2	potassium two pore domain channel subfamily K member 2 [Source:VGNC Symbol;Acc:VGNC:89369]
ENSSSCG00000023451	Upregulated	140201	9	-	128429571	128588282	TCONS_00225283	7	4150	XLOC_061248	KCNK2	potassium two pore domain channel subfamily K member 2 [Source:VGNC Symbol;Acc:VGNC:89369]
ENSSSCG00000023451	Upregulated	140202	9	-	128430560	128659615	TCONS_00225284	7	3456	XLOC_061248	KCNK2	potassium two pore domain channel subfamily K member 2 [Source:VGNC Symbol;Acc:VGNC:89369]
ENSSSCG00000023451	Upregulated	140203	9	-	128430567	128589093	TCONS_00225285	7	3015	XLOC_061248	KCNK2	potassium two pore domain channel subfamily K member 2 [Source:VGNC Symbol;Acc:VGNC:89369]
ENSSSCG00000046319	Upregulated	1256	1	+	12419121	12602742	TCONS_00000623	17	6478	XLOC_000191	ENSSSCG00000046319
ENSSSCG00000046319	Upregulated	1257	1	+	12419181	12602742	TCONS_00000624	16	6310	XLOC_000191	ENSSSCG00000046319
ENSSSCG00000046319	Upregulated	1261	1	+	12480365	12602742	TCONS_00000625	16	6284	XLOC_000191	ENSSSCG00000046319
ENSSSCG00000046319	Upregulated	1264	1	+	12491440	12602742	TCONS_00000626	11	6091	XLOC_000191	ENSSSCG00000046319
ENSSSCG00000046319	Upregulated	1268	1	+	12514488	12602742	TCONS_00000627	10	6008	XLOC_000191	ENSSSCG00000046319
ENSSSCG00000046319	Upregulated	1269	1	+	12514496	12602742	TCONS_00000628	12	6210	XLOC_000191	ENSSSCG00000046319
ENSSSCG00000046319	Upregulated	1270	1	+	12527871	12602656	TCONS_00000629	12	6170	XLOC_000191	ENSSSCG00000046319
ENSSSCG00000046319	Upregulated	1271	1	+	12527871	12602742	TCONS_00000630	12	5683	XLOC_000191	ENSSSCG00000046319
ENSSSCG00000046319	Upregulated	1273	1	-	12553727	12599535	TCONS_00011597	6	2741	XLOC_003231	ENSSSCG00000046319
ENSSSCG00000046319	Upregulated	1274	1	+	12554225	12602742	TCONS_00000631	3	4927	XLOC_000191	ENSSSCG00000046319
ENSSSCG00000014039	Upregulated	35782	2	-	80574259	80584025	TCONS_00123267	15	3393	XLOC_033588	RGS14	regulator of G protein signaling 14 [Source:VGNC Symbol;Acc:VGNC:92261]
ENSSSCG00000014039	Upregulated	35783	2	-	80574259	80590003	TCONS_00123268	14	4001	XLOC_033588	RGS14	regulator of G protein signaling 14 [Source:VGNC Symbol;Acc:VGNC:92261]
ENSSSCG00000014039	Upregulated	35784	2	-	80574259	80590003	TCONS_00123269	14	3423	XLOC_033588	RGS14	regulator of G protein signaling 14 [Source:VGNC Symbol;Acc:VGNC:92261]
ENSSSCG00000014039	Upregulated	35785	2	-	80574259	80590003	TCONS_00123270	15	3547	XLOC_033588	RGS14	regulator of G protein signaling 14 [Source:VGNC Symbol;Acc:VGNC:92261]
ENSSSCG00000014039	Upregulated	35786	2	-	80574259	80590003	TCONS_00123271	14	4035	XLOC_033588	RGS14	regulator of G protein signaling 14 [Source:VGNC Symbol;Acc:VGNC:92261]
ENSSSCG00000014039	Upregulated	35787	2	-	80574259	80590022	TCONS_00123272	13	3841	XLOC_033588	RGS14	regulator of G protein signaling 14 [Source:VGNC Symbol;Acc:VGNC:92261]
ENSSSCG00000014039	Upregulated	35788	2	+	80574341	80576892	TCONS_00113447	5	2014	XLOC_031022	RGS14	regulator of G protein signaling 14 [Source:VGNC Symbol;Acc:VGNC:92261]
ENSSSCG00000014039	Upregulated	35789	2	-	80574411	80590003	TCONS_00123273	15	3395	XLOC_033588	RGS14	regulator of G protein signaling 14 [Source:VGNC Symbol;Acc:VGNC:92261]
ENSSSCG00000014039	Upregulated	35790	2	+	80574451	80576892	TCONS_00113448	5	1904	XLOC_031022	RGS14	regulator of G protein signaling 14 [Source:VGNC Symbol;Acc:VGNC:92261]
ENSSSCG00000014039	Upregulated	35791	2	+	80574456	80576892	TCONS_00113449	5	1899	XLOC_031022	RGS14	regulator of G protein signaling 14 [Source:VGNC Symbol;Acc:VGNC:92261]
ENSSSCG00000014039	Upregulated	35792	2	+	80574456	80576892	TCONS_00113450	5	1899	XLOC_031022	RGS14	regulator of G protein signaling 14 [Source:VGNC Symbol;Acc:VGNC:92261]
ENSSSCG00000014039	Upregulated	35793	2	+	80574456	80576892	TCONS_00113451	5	1899	XLOC_031022	RGS14	regulator of G protein signaling 14 [Source:VGNC Symbol;Acc:VGNC:92261]
ENSSSCG00000014039	Upregulated	35794	2	+	80576950	80581795	TCONS_00113452	6	1142	XLOC_031023	RGS14	regulator of G protein signaling 14 [Source:VGNC Symbol;Acc:VGNC:92261]
ENSSSCG00000014039	Upregulated	35795	2	-	80581440	80608551	TCONS_00123274	9	1582	XLOC_033589	RGS14	regulator of G protein signaling 14 [Source:VGNC Symbol;Acc:VGNC:92261]
ENSSSCG00000003640	Upregulated	99114	6	-	92880296	92945597	TCONS_00186799	12	6045	XLOC_050403	GRIK3	glutamate ionotropic receptor kainate type subunit 3 [Source:VGNC Symbol;Acc:VGNC:88679]
ENSSSCG00000003640	Upregulated	99115	6	-	92880296	93075848	TCONS_00186800	18	7109	XLOC_050403	GRIK3	glutamate ionotropic receptor kainate type subunit 3 [Source:VGNC Symbol;Acc:VGNC:88679]
ENSSSCG00000003640	Upregulated	99116	6	-	92880296	93127957	TCONS_00186801	16	8168	XLOC_050403	GRIK3	glutamate ionotropic receptor kainate type subunit 3 [Source:VGNC Symbol;Acc:VGNC:88679]
ENSSSCG00000003640	Upregulated	99117	6	-	92880296	93127957	TCONS_00186802	18	7211	XLOC_050403	GRIK3	glutamate ionotropic receptor kainate type subunit 3 [Source:VGNC Symbol;Acc:VGNC:88679]
ENSSSCG00000003640	Upregulated	99118	6	-	92880296	93127957	TCONS_00186803	18	7211	XLOC_050403	GRIK3	glutamate ionotropic receptor kainate type subunit 3 [Source:VGNC Symbol;Acc:VGNC:88679]
ENSSSCG00000003640	Upregulated	99119	6	-	92880296	93127957	TCONS_00186804	17	7034	XLOC_050403	GRIK3	glutamate ionotropic receptor kainate type subunit 3 [Source:VGNC Symbol;Acc:VGNC:88679]
ENSSSCG00000003640	Upregulated	99120	6	-	92880296	93127957	TCONS_00186805	17	7034	XLOC_050403	GRIK3	glutamate ionotropic receptor kainate type subunit 3 [Source:VGNC Symbol;Acc:VGNC:88679]
ENSSSCG00000003640	Upregulated	99121	6	-	92880296	93127957	TCONS_00186806	18	7211	XLOC_050403	GRIK3	glutamate ionotropic receptor kainate type subunit 3 [Source:VGNC Symbol;Acc:VGNC:88679]
ENSSSCG00000003640	Upregulated	99122	6	-	92880296	93128582	TCONS_00186807	17	8547	XLOC_050403	GRIK3	glutamate ionotropic receptor kainate type subunit 3 [Source:VGNC Symbol;Acc:VGNC:88679]
ENSSSCG00000003640	Upregulated	99123	6	-	92880296	93128582	TCONS_00186808	18	7413	XLOC_050403	GRIK3	glutamate ionotropic receptor kainate type subunit 3 [Source:VGNC Symbol;Acc:VGNC:88679]
ENSSSCG00000003640	Upregulated	99124	6	-	92880301	93127914	TCONS_00186809	18	7163	XLOC_050403	GRIK3	glutamate ionotropic receptor kainate type subunit 3 [Source:VGNC Symbol;Acc:VGNC:88679]
ENSSSCG00000003640	Upregulated	99125	6	-	92880301	93127957	TCONS_00186810	17	7029	XLOC_050403	GRIK3	glutamate ionotropic receptor kainate type subunit 3 [Source:VGNC Symbol;Acc:VGNC:88679]
ENSSSCG00000003640	Upregulated	99126	6	-	92880301	93128582	TCONS_00186811	18	7408	XLOC_050403	GRIK3	glutamate ionotropic receptor kainate type subunit 3 [Source:VGNC Symbol;Acc:VGNC:88679]
ENSSSCG00000003640	Upregulated	99127	6	+	92880356	92945606	TCONS_00175974	9	7815	XLOC_047634	GRIK3	glutamate ionotropic receptor kainate type subunit 3 [Source:VGNC Symbol;Acc:VGNC:88679]
ENSSSCG00000003640	Upregulated	99128	6	+	92880356	92957731	TCONS_00175975	13	8445	XLOC_047634	GRIK3	glutamate ionotropic receptor kainate type subunit 3 [Source:VGNC Symbol;Acc:VGNC:88679]
ENSSSCG00000003640	Upregulated	99129	6	+	92880366	92889444	TCONS_00175976	3	6712	XLOC_047634	GRIK3	glutamate ionotropic receptor kainate type subunit 3 [Source:VGNC Symbol;Acc:VGNC:88679]
ENSSSCG00000003640	Upregulated	99130	6	+	92880366	92910784	TCONS_00175977	6	7274	XLOC_047634	GRIK3	glutamate ionotropic receptor kainate type subunit 3 [Source:VGNC Symbol;Acc:VGNC:88679]
ENSSSCG00000003748	Upregulated	101467	6	+	121065657	121093203	TCONS_00177138	5	3029	XLOC_047917	CELF4	CUGBP Elav-like family member 4 [Source:VGNC Symbol;Acc:VGNC:86539]
ENSSSCG00000003748	Upregulated	101468	6	-	121066573	121144516	TCONS_00187985	12	2423	XLOC_050693	CELF4	CUGBP Elav-like family member 4 [Source:VGNC Symbol;Acc:VGNC:86539]
ENSSSCG00000003748	Upregulated	101469	6	-	121066573	121144588	TCONS_00187986	12	2492	XLOC_050693	CELF4	CUGBP Elav-like family member 4 [Source:VGNC Symbol;Acc:VGNC:86539]
ENSSSCG00000003748	Upregulated	101470	6	-	121066573	121144594	TCONS_00187987	11	2417	XLOC_050693	CELF4	CUGBP Elav-like family member 4 [Source:VGNC Symbol;Acc:VGNC:86539]
ENSSSCG00000003748	Upregulated	101471	6	-	121066573	121301026	TCONS_00187988	13	2451	XLOC_050693	CELF4	CUGBP Elav-like family member 4 [Source:VGNC Symbol;Acc:VGNC:86539]
ENSSSCG00000003748	Upregulated	101472	6	-	121066573	121301068	TCONS_00187989	12	2406	XLOC_050693	CELF4	CUGBP Elav-like family member 4 [Source:VGNC Symbol;Acc:VGNC:86539]
ENSSSCG00000003748	Upregulated	101473	6	-	121066573	121381029	TCONS_00187990	10	2681	XLOC_050693	CELF4	CUGBP Elav-like family member 4 [Source:VGNC Symbol;Acc:VGNC:86539]
ENSSSCG00000003748	Upregulated	101474	6	-	121066573	121381029	TCONS_00187991	10	2714	XLOC_050693	CELF4	CUGBP Elav-like family member 4 [Source:VGNC Symbol;Acc:VGNC:86539]
ENSSSCG00000003748	Upregulated	101475	6	-	121066573	121381029	TCONS_00187992	12	2828	XLOC_050693	CELF4	CUGBP Elav-like family member 4 [Source:VGNC Symbol;Acc:VGNC:86539]
ENSSSCG00000003748	Upregulated	101476	6	-	121066573	121381029	TCONS_00187993	13	2912	XLOC_050693	CELF4	CUGBP Elav-like family member 4 [Source:VGNC Symbol;Acc:VGNC:86539]
ENSSSCG00000003748	Upregulated	101477	6	-	121066573	121381029	TCONS_00187994	10	2711	XLOC_050693	CELF4	CUGBP Elav-like family member 4 [Source:VGNC Symbol;Acc:VGNC:86539]
ENSSSCG00000003748	Upregulated	101478	6	-	121066573	121381029	TCONS_00187995	13	2915	XLOC_050693	CELF4	CUGBP Elav-like family member 4 [Source:VGNC Symbol;Acc:VGNC:86539]
ENSSSCG00000003748	Upregulated	101479	6	-	121066573	121381029	TCONS_00187996	10	2681	XLOC_050693	CELF4	CUGBP Elav-like family member 4 [Source:VGNC Symbol;Acc:VGNC:86539]
ENSSSCG00000003748	Upregulated	101480	6	-	121066573	121381029	TCONS_00187997	13	2910	XLOC_050693	CELF4	CUGBP Elav-like family member 4 [Source:VGNC Symbol;Acc:VGNC:86539]
ENSSSCG00000003748	Upregulated	101481	6	-	121066573	121381029	TCONS_00187998	13	2940	XLOC_050693	CELF4	CUGBP Elav-like family member 4 [Source:VGNC Symbol;Acc:VGNC:86539]
ENSSSCG00000003748	Upregulated	101482	6	-	121066573	121381029	TCONS_00187999	15	3084	XLOC_050693	CELF4	CUGBP Elav-like family member 4 [Source:VGNC Symbol;Acc:VGNC:86539]
ENSSSCG00000003748	Upregulated	101483	6	-	121066573	121381029	TCONS_00188000	15	3081	XLOC_050693	CELF4	CUGBP Elav-like family member 4 [Source:VGNC Symbol;Acc:VGNC:86539]
ENSSSCG00000003748	Upregulated	101484	6	-	121066749	121380983	TCONS_00188001	13	2714	XLOC_050693	CELF4	CUGBP Elav-like family member 4 [Source:VGNC Symbol;Acc:VGNC:86539]
ENSSSCG00000003748	Upregulated	101485	6	-	121066749	121380983	TCONS_00188002	14	2780	XLOC_050693	CELF4	CUGBP Elav-like family member 4 [Source:VGNC Symbol;Acc:VGNC:86539]
ENSSSCG00000003748	Upregulated	101486	6	-	121066749	121380985	TCONS_00188003	13	2725	XLOC_050693	CELF4	CUGBP Elav-like family member 4 [Source:VGNC Symbol;Acc:VGNC:86539]
ENSSSCG00000003748	Upregulated	101487	6	-	121066750	121381029	TCONS_00188004	12	2684	XLOC_050693	CELF4	CUGBP Elav-like family member 4 [Source:VGNC Symbol;Acc:VGNC:86539]
ENSSSCG00000003748	Upregulated	101488	6	-	121067154	121380850	TCONS_00188005	13	2150	XLOC_050693	CELF4	CUGBP Elav-like family member 4 [Source:VGNC Symbol;Acc:VGNC:86539]
ENSSSCG00000003748	Upregulated	101489	6	-	121067154	121380983	TCONS_00188006	15	2487	XLOC_050693	CELF4	CUGBP Elav-like family member 4 [Source:VGNC Symbol;Acc:VGNC:86539]
ENSSSCG00000003748	Upregulated	101490	6	-	121067578	121380962	TCONS_00188007	10	1639	XLOC_050693	CELF4	CUGBP Elav-like family member 4 [Source:VGNC Symbol;Acc:VGNC:86539]
ENSSSCG00000003748	Upregulated	101491	6	+	121094666	121096276	TCONS_00177139	3	269	XLOC_047918	CELF4	CUGBP Elav-like family member 4 [Source:VGNC Symbol;Acc:VGNC:86539]
ENSSSCG00000010959	Upregulated	144479	10	-	30033379	30429812	TCONS_00027217	21	6128	XLOC_007700	NTRK2	neurotrophic receptor tyrosine kinase 2 [Source:VGNC Symbol;Acc:VGNC:96455]
ENSSSCG00000010959	Upregulated	144480	10	-	30033379	30429882	TCONS_00027218	21	6198	XLOC_007700	NTRK2	neurotrophic receptor tyrosine kinase 2 [Source:VGNC Symbol;Acc:VGNC:96455]
ENSSSCG00000010959	Upregulated	144481	10	-	30033940	30429882	TCONS_00027219	19	5520	XLOC_007700	NTRK2	neurotrophic receptor tyrosine kinase 2 [Source:VGNC Symbol;Acc:VGNC:96455]
ENSSSCG00000010959	Upregulated	144482	10	-	30033940	30429882	TCONS_00027220	20	5589	XLOC_007700	NTRK2	neurotrophic receptor tyrosine kinase 2 [Source:VGNC Symbol;Acc:VGNC:96455]
ENSSSCG00000010959	Upregulated	144483	10	-	30033940	30429882	TCONS_00027221	19	5517	XLOC_007700	NTRK2	neurotrophic receptor tyrosine kinase 2 [Source:VGNC Symbol;Acc:VGNC:96455]
ENSSSCG00000010959	Upregulated	144485	10	+	30120453	30354264	TCONS_00023755	2	119	XLOC_006668	NTRK2	neurotrophic receptor tyrosine kinase 2 [Source:VGNC Symbol;Acc:VGNC:96455]
ENSSSCG00000010959	Upregulated	144488	10	-	30199037	30429758	TCONS_00027224	16	3024	XLOC_007700	NTRK2	neurotrophic receptor tyrosine kinase 2 [Source:VGNC Symbol;Acc:VGNC:96455]
ENSSSCG00000010959	Upregulated	144489	10	-	30199037	30429882	TCONS_00027225	17	3221	XLOC_007700	NTRK2	neurotrophic receptor tyrosine kinase 2 [Source:VGNC Symbol;Acc:VGNC:96455]
ENSSSCG00000010959	Upregulated	144490	10	-	30199037	30429882	TCONS_00027226	17	3221	XLOC_007700	NTRK2	neurotrophic receptor tyrosine kinase 2 [Source:VGNC Symbol;Acc:VGNC:96455]
ENSSSCG00000010959	Upregulated	144491	10	-	30199052	30428953	TCONS_00027227	16	2803	XLOC_007700	NTRK2	neurotrophic receptor tyrosine kinase 2 [Source:VGNC Symbol;Acc:VGNC:96455]
ENSSSCG00000010959	Upregulated	144492	10	+	30257561	30427654	TCONS_00023756	12	6976	XLOC_006669	NTRK2	neurotrophic receptor tyrosine kinase 2 [Source:VGNC Symbol;Acc:VGNC:96455]
ENSSSCG00000010959	Upregulated	144493	10	-	30389938	30495577	TCONS_00027228	2	125	XLOC_007703	NTRK2	neurotrophic receptor tyrosine kinase 2 [Source:VGNC Symbol;Acc:VGNC:96455]
ENSSSCG00000010959	Upregulated	144494	10	+	30389939	30495579	TCONS_00023757	2	126	XLOC_006670	NTRK2	neurotrophic receptor tyrosine kinase 2 [Source:VGNC Symbol;Acc:VGNC:96455]
ENSSSCG00000036155	Upregulated	126332	8	-	99148489	99310519	TCONS_00212206	23	15431	XLOC_057532	ENSSSCG00000036155
ENSSSCG00000036155	Upregulated	126333	8	-	99148489	99310519	TCONS_00212207	22	15804	XLOC_057532	ENSSSCG00000036155
ENSSSCG00000036155	Upregulated	126334	8	-	99148489	99310519	TCONS_00212208	22	15804	XLOC_057532	ENSSSCG00000036155
ENSSSCG00000036155	Upregulated	126335	8	-	99148489	99310519	TCONS_00212209	22	15804	XLOC_057532	ENSSSCG00000036155
ENSSSCG00000036155	Upregulated	126336	8	-	99148489	99310519	TCONS_00212210	22	15804	XLOC_057532	ENSSSCG00000036155
ENSSSCG00000001485	Upregulated	109387	7	-	26561205	26700067	TCONS_00198956	9	3089	XLOC_053837	MLIP	muscular LMNA interacting protein [Source:VGNC Symbol;Acc:VGNC:90253]
ENSSSCG00000001485	Upregulated	109388	7	-	26561205	26700067	TCONS_00198957	12	3299	XLOC_053837	MLIP	muscular LMNA interacting protein [Source:VGNC Symbol;Acc:VGNC:90253]
ENSSSCG00000001485	Upregulated	109389	7	-	26561205	26700067	TCONS_00198958	10	3029	XLOC_053837	MLIP	muscular LMNA interacting protein [Source:VGNC Symbol;Acc:VGNC:90253]
ENSSSCG00000001485	Upregulated	109390	7	-	26561205	26700067	TCONS_00198959	12	3215	XLOC_053837	MLIP	muscular LMNA interacting protein [Source:VGNC Symbol;Acc:VGNC:90253]
ENSSSCG00000001485	Upregulated	109391	7	-	26561205	26700067	TCONS_00198960	11	4583	XLOC_053837	MLIP	muscular LMNA interacting protein [Source:VGNC Symbol;Acc:VGNC:90253]
ENSSSCG00000001485	Upregulated	109392	7	-	26561205	26700067	TCONS_00198961	11	2987	XLOC_053837	MLIP	muscular LMNA interacting protein [Source:VGNC Symbol;Acc:VGNC:90253]
ENSSSCG00000001485	Upregulated	109393	7	-	26561205	26700067	TCONS_00198962	11	3215	XLOC_053837	MLIP	muscular LMNA interacting protein [Source:VGNC Symbol;Acc:VGNC:90253]
ENSSSCG00000001485	Upregulated	109394	7	-	26561205	26700067	TCONS_00198963	12	4637	XLOC_053837	MLIP	muscular LMNA interacting protein [Source:VGNC Symbol;Acc:VGNC:90253]
ENSSSCG00000001485	Upregulated	109395	7	-	26561205	26700067	TCONS_00198964	9	2957	XLOC_053837	MLIP	muscular LMNA interacting protein [Source:VGNC Symbol;Acc:VGNC:90253]
ENSSSCG00000001485	Upregulated	109396	7	-	26561205	26700067	TCONS_00198965	9	4439	XLOC_053837	MLIP	muscular LMNA interacting protein [Source:VGNC Symbol;Acc:VGNC:90253]
ENSSSCG00000001485	Upregulated	109397	7	-	26561205	26700067	TCONS_00198966	9	2885	XLOC_053837	MLIP	muscular LMNA interacting protein [Source:VGNC Symbol;Acc:VGNC:90253]
ENSSSCG00000001485	Upregulated	109398	7	-	26561205	26700067	TCONS_00198967	10	3174	XLOC_053837	MLIP	muscular LMNA interacting protein [Source:VGNC Symbol;Acc:VGNC:90253]
ENSSSCG00000001485	Upregulated	109399	7	-	26561205	26700067	TCONS_00198968	10	3059	XLOC_053837	MLIP	muscular LMNA interacting protein [Source:VGNC Symbol;Acc:VGNC:90253]
ENSSSCG00000001485	Upregulated	109400	7	-	26561205	26700067	TCONS_00198969	10	3041	XLOC_053837	MLIP	muscular LMNA interacting protein [Source:VGNC Symbol;Acc:VGNC:90253]
ENSSSCG00000001485	Upregulated	109401	7	-	26561205	26700067	TCONS_00198970	11	3161	XLOC_053837	MLIP	muscular LMNA interacting protein [Source:VGNC Symbol;Acc:VGNC:90253]
ENSSSCG00000001485	Upregulated	109402	7	-	26561205	26700067	TCONS_00198971	10	2915	XLOC_053837	MLIP	muscular LMNA interacting protein [Source:VGNC Symbol;Acc:VGNC:90253]
ENSSSCG00000001485	Upregulated	109403	7	-	26561205	26700080	TCONS_00198972	10	3042	XLOC_053837	MLIP	muscular LMNA interacting protein [Source:VGNC Symbol;Acc:VGNC:90253]
ENSSSCG00000001485	Upregulated	109404	7	-	26561205	26793724	TCONS_00198973	13	3411	XLOC_053837	MLIP	muscular LMNA interacting protein [Source:VGNC Symbol;Acc:VGNC:90253]
ENSSSCG00000001485	Upregulated	109405	7	-	26561205	26793724	TCONS_00198974	11	3153	XLOC_053837	MLIP	muscular LMNA interacting protein [Source:VGNC Symbol;Acc:VGNC:90253]
ENSSSCG00000001485	Upregulated	109406	7	-	26561205	26793724	TCONS_00198975	11	3042	XLOC_053837	MLIP	muscular LMNA interacting protein [Source:VGNC Symbol;Acc:VGNC:90253]
ENSSSCG00000001485	Upregulated	109407	7	-	26561205	26793724	TCONS_00198976	12	3339	XLOC_053837	MLIP	muscular LMNA interacting protein [Source:VGNC Symbol;Acc:VGNC:90253]
ENSSSCG00000001485	Upregulated	109408	7	-	26561205	26793724	TCONS_00198977	10	3069	XLOC_053837	MLIP	muscular LMNA interacting protein [Source:VGNC Symbol;Acc:VGNC:90253]
ENSSSCG00000001485	Upregulated	109409	7	-	26561205	26793724	TCONS_00198978	10	2814	XLOC_053837	MLIP	muscular LMNA interacting protein [Source:VGNC Symbol;Acc:VGNC:90253]
ENSSSCG00000001485	Upregulated	109410	7	-	26561205	26793724	TCONS_00198979	11	4530	XLOC_053837	MLIP	muscular LMNA interacting protein [Source:VGNC Symbol;Acc:VGNC:90253]
ENSSSCG00000001485	Upregulated	109411	7	-	26561205	26793724	TCONS_00198980	13	4911	XLOC_053837	MLIP	muscular LMNA interacting protein [Source:VGNC Symbol;Acc:VGNC:90253]
ENSSSCG00000001485	Upregulated	109412	7	-	26561205	26793724	TCONS_00198981	11	2886	XLOC_053837	MLIP	muscular LMNA interacting protein [Source:VGNC Symbol;Acc:VGNC:90253]
ENSSSCG00000001485	Upregulated	109413	7	-	26561205	26793724	TCONS_00198982	11	3042	XLOC_053837	MLIP	muscular LMNA interacting protein [Source:VGNC Symbol;Acc:VGNC:90253]
ENSSSCG00000001485	Upregulated	109414	7	-	26561205	26793724	TCONS_00198983	6	2715	XLOC_053837	MLIP	muscular LMNA interacting protein [Source:VGNC Symbol;Acc:VGNC:90253]
ENSSSCG00000001485	Upregulated	109415	7	-	26561205	26793724	TCONS_00198984	10	4563	XLOC_053837	MLIP	muscular LMNA interacting protein [Source:VGNC Symbol;Acc:VGNC:90253]
ENSSSCG00000001485	Upregulated	109416	7	-	26561205	26793724	TCONS_00198985	7	2628	XLOC_053837	MLIP	muscular LMNA interacting protein [Source:VGNC Symbol;Acc:VGNC:90253]
ENSSSCG00000001485	Upregulated	109417	7	-	26561205	26793724	TCONS_00198986	6	2887	XLOC_053837	MLIP	muscular LMNA interacting protein [Source:VGNC Symbol;Acc:VGNC:90253]
ENSSSCG00000001485	Upregulated	109418	7	-	26561205	26793724	TCONS_00198987	9	2772	XLOC_053837	MLIP	muscular LMNA interacting protein [Source:VGNC Symbol;Acc:VGNC:90253]
ENSSSCG00000001485	Upregulated	109419	7	-	26561205	26793724	TCONS_00198988	7	2791	XLOC_053837	MLIP	muscular LMNA interacting protein [Source:VGNC Symbol;Acc:VGNC:90253]
ENSSSCG00000001485	Upregulated	109420	7	-	26561205	26793724	TCONS_00198989	12	4768	XLOC_053837	MLIP	muscular LMNA interacting protein [Source:VGNC Symbol;Acc:VGNC:90253]
ENSSSCG00000001485	Upregulated	109421	7	-	26561205	26793724	TCONS_00198990	6	2574	XLOC_053837	MLIP	muscular LMNA interacting protein [Source:VGNC Symbol;Acc:VGNC:90253]
ENSSSCG00000001485	Upregulated	109422	7	-	26561205	26793724	TCONS_00198991	11	3060	XLOC_053837	MLIP	muscular LMNA interacting protein [Source:VGNC Symbol;Acc:VGNC:90253]
ENSSSCG00000001485	Upregulated	109423	7	-	26561205	26796741	TCONS_00198992	12	4811	XLOC_053837	MLIP	muscular LMNA interacting protein [Source:VGNC Symbol;Acc:VGNC:90253]
ENSSSCG00000001485	Upregulated	109424	7	+	26561307	26709775	TCONS_00191976	10	2846	XLOC_051909	MLIP	muscular LMNA interacting protein [Source:VGNC Symbol;Acc:VGNC:90253]
ENSSSCG00000001485	Upregulated	109425	7	+	26561307	26709775	TCONS_00191977	9	2780	XLOC_051909	MLIP	muscular LMNA interacting protein [Source:VGNC Symbol;Acc:VGNC:90253]
ENSSSCG00000001485	Upregulated	109426	7	-	26561359	26793724	TCONS_00198993	13	4583	XLOC_053837	MLIP	muscular LMNA interacting protein [Source:VGNC Symbol;Acc:VGNC:90253]
ENSSSCG00000001485	Upregulated	109427	7	-	26561362	26793716	TCONS_00198994	10	4161	XLOC_053837	MLIP	muscular LMNA interacting protein [Source:VGNC Symbol;Acc:VGNC:90253]
ENSSSCG00000001485	Upregulated	109428	7	-	26561363	26700037	TCONS_00198995	12	4479	XLOC_053837	MLIP	muscular LMNA interacting protein [Source:VGNC Symbol;Acc:VGNC:90253]
ENSSSCG00000001485	Upregulated	109429	7	-	26561366	26793689	TCONS_00198996	14	4769	XLOC_053837	MLIP	muscular LMNA interacting protein [Source:VGNC Symbol;Acc:VGNC:90253]
ENSSSCG00000001485	Upregulated	109430	7	+	26561471	26709775	TCONS_00191978	10	2688	XLOC_051909	MLIP	muscular LMNA interacting protein [Source:VGNC Symbol;Acc:VGNC:90253]
ENSSSCG00000001485	Upregulated	109431	7	+	26561472	26699985	TCONS_00191979	10	2680	XLOC_051909	MLIP	muscular LMNA interacting protein [Source:VGNC Symbol;Acc:VGNC:90253]
ENSSSCG00000001485	Upregulated	109432	7	+	26561472	26709775	TCONS_00191980	11	2891	XLOC_051909	MLIP	muscular LMNA interacting protein [Source:VGNC Symbol;Acc:VGNC:90253]
ENSSSCG00000001485	Upregulated	109433	7	+	26561472	26709775	TCONS_00191981	11	2741	XLOC_051909	MLIP	muscular LMNA interacting protein [Source:VGNC Symbol;Acc:VGNC:90253]
ENSSSCG00000001485	Upregulated	109434	7	+	26561472	26709775	TCONS_00191982	8	2561	XLOC_051909	MLIP	muscular LMNA interacting protein [Source:VGNC Symbol;Acc:VGNC:90253]
ENSSSCG00000001485	Upregulated	109435	7	+	26561472	26709775	TCONS_00191983	9	2531	XLOC_051909	MLIP	muscular LMNA interacting protein [Source:VGNC Symbol;Acc:VGNC:90253]
ENSSSCG00000001485	Upregulated	109436	7	+	26561472	26709775	TCONS_00191984	10	2669	XLOC_051909	MLIP	muscular LMNA interacting protein [Source:VGNC Symbol;Acc:VGNC:90253]
ENSSSCG00000001485	Upregulated	109437	7	+	26561472	26709775	TCONS_00191985	7	2489	XLOC_051909	MLIP	muscular LMNA interacting protein [Source:VGNC Symbol;Acc:VGNC:90253]
ENSSSCG00000001485	Upregulated	109438	7	+	26561472	26709775	TCONS_00191986	9	2627	XLOC_051909	MLIP	muscular LMNA interacting protein [Source:VGNC Symbol;Acc:VGNC:90253]
ENSSSCG00000001485	Upregulated	109439	7	+	26561472	26709775	TCONS_00191987	6	2333	XLOC_051909	MLIP	muscular LMNA interacting protein [Source:VGNC Symbol;Acc:VGNC:90253]
ENSSSCG00000001485	Upregulated	109440	7	+	26561472	26709775	TCONS_00191988	9	2642	XLOC_051909	MLIP	muscular LMNA interacting protein [Source:VGNC Symbol;Acc:VGNC:90253]
ENSSSCG00000001485	Upregulated	109441	7	+	26561472	26793541	TCONS_00191989	10	2619	XLOC_051909	MLIP	muscular LMNA interacting protein [Source:VGNC Symbol;Acc:VGNC:90253]
ENSSSCG00000001485	Upregulated	109442	7	-	26562802	26793675	TCONS_00198997	13	3265	XLOC_053837	MLIP	muscular LMNA interacting protein [Source:VGNC Symbol;Acc:VGNC:90253]
ENSSSCG00000001485	Upregulated	109443	7	-	26562812	26793652	TCONS_00198998	12	3089	XLOC_053837	MLIP	muscular LMNA interacting protein [Source:VGNC Symbol;Acc:VGNC:90253]
ENSSSCG00000001485	Upregulated	109444	7	+	26573845	26796473	TCONS_00191990	8	915	XLOC_051909	MLIP	muscular LMNA interacting protein [Source:VGNC Symbol;Acc:VGNC:90253]
ENSSSCG00000001485	Upregulated	109445	7	-	26598955	26700037	TCONS_00198999	9	3327	XLOC_053837	MLIP	muscular LMNA interacting protein [Source:VGNC Symbol;Acc:VGNC:90253]
ENSSSCG00000001485	Upregulated	109446	7	-	26598955	26700067	TCONS_00199000	12	1690	XLOC_053837	MLIP	muscular LMNA interacting protein [Source:VGNC Symbol;Acc:VGNC:90253]
ENSSSCG00000001485	Upregulated	109447	7	-	26598955	26700067	TCONS_00199001	11	3243	XLOC_053837	MLIP	muscular LMNA interacting protein [Source:VGNC Symbol;Acc:VGNC:90253]
ENSSSCG00000001485	Upregulated	109448	7	-	26598955	26793724	TCONS_00199002	11	1646	XLOC_053837	MLIP	muscular LMNA interacting protein [Source:VGNC Symbol;Acc:VGNC:90253]
ENSSSCG00000001485	Upregulated	109449	7	-	26599056	26793654	TCONS_00199003	13	3113	XLOC_053837	MLIP	muscular LMNA interacting protein [Source:VGNC Symbol;Acc:VGNC:90253]
ENSSSCG00000001485	Upregulated	109450	7	+	26599449	26709775	TCONS_00191991	7	994	XLOC_051909	MLIP	muscular LMNA interacting protein [Source:VGNC Symbol;Acc:VGNC:90253]
ENSSSCG00000001485	Upregulated	109451	7	+	26599550	26709775	TCONS_00191992	8	959	XLOC_051909	MLIP	muscular LMNA interacting protein [Source:VGNC Symbol;Acc:VGNC:90253]
ENSSSCG00000000774	Upregulated	81391	5	+	70183308	70227985	TCONS_00161153	10	3165	XLOC_043684	USP18	ubiquitin specific peptidase 18 [Source:NCBI gene (formerly Entrezgene);Acc:396777]
ENSSSCG00000000774	Upregulated	81392	5	+	70183308	70227990	TCONS_00161154	11	1685	XLOC_043684	USP18	ubiquitin specific peptidase 18 [Source:NCBI gene (formerly Entrezgene);Acc:396777]
ENSSSCG00000000774	Upregulated	81393	5	+	70183308	70227990	TCONS_00161155	11	1685	XLOC_043684	USP18	ubiquitin specific peptidase 18 [Source:NCBI gene (formerly Entrezgene);Acc:396777]
ENSSSCG00000000774	Upregulated	81394	5	+	70183308	70227990	TCONS_00161156	11	2252	XLOC_043684	USP18	ubiquitin specific peptidase 18 [Source:NCBI gene (formerly Entrezgene);Acc:396777]
ENSSSCG00000000774	Upregulated	81395	5	+	70183308	70227990	TCONS_00161157	11	1730	XLOC_043684	USP18	ubiquitin specific peptidase 18 [Source:NCBI gene (formerly Entrezgene);Acc:396777]
ENSSSCG00000000774	Upregulated	81396	5	+	70183308	70227990	TCONS_00161158	11	2252	XLOC_043684	USP18	ubiquitin specific peptidase 18 [Source:NCBI gene (formerly Entrezgene);Acc:396777]
ENSSSCG00000000774	Upregulated	81397	5	-	70183315	70227940	TCONS_00167140	11	1628	XLOC_045349	USP18	ubiquitin specific peptidase 18 [Source:NCBI gene (formerly Entrezgene);Acc:396777]
ENSSSCG00000000774	Upregulated	81398	5	-	70204385	70227939	TCONS_00167141	11	1741	XLOC_045349	USP18	ubiquitin specific peptidase 18 [Source:NCBI gene (formerly Entrezgene);Acc:396777]
ENSSSCG00000000774	Upregulated	81399	5	+	70205755	70227990	TCONS_00161159	10	1732	XLOC_043684	USP18	ubiquitin specific peptidase 18 [Source:NCBI gene (formerly Entrezgene);Acc:396777]
ENSSSCG00000000774	Upregulated	81400	5	+	70205755	70227990	TCONS_00161160	10	2299	XLOC_043684	USP18	ubiquitin specific peptidase 18 [Source:NCBI gene (formerly Entrezgene);Acc:396777]
ENSSSCG00000012309	Upregulated	228562	X	-	44302048	44384140	TCONS_00235969	11	6119	XLOC_065281	SHROOM4	shroom family member 4 [Source:VGNC Symbol;Acc:VGNC:92861]
ENSSSCG00000012309	Upregulated	228563	X	-	44302048	44386195	TCONS_00235970	12	6185	XLOC_065281	SHROOM4	shroom family member 4 [Source:VGNC Symbol;Acc:VGNC:92861]
ENSSSCG00000012309	Upregulated	228564	X	-	44302048	44543549	TCONS_00235971	13	5685	XLOC_065281	SHROOM4	shroom family member 4 [Source:VGNC Symbol;Acc:VGNC:92861]
ENSSSCG00000012309	Upregulated	228565	X	-	44302048	44543549	TCONS_00235972	12	6633	XLOC_065281	SHROOM4	shroom family member 4 [Source:VGNC Symbol;Acc:VGNC:92861]
ENSSSCG00000012309	Upregulated	228566	X	-	44302074	44543372	TCONS_00235973	11	6280	XLOC_065281	SHROOM4	shroom family member 4 [Source:VGNC Symbol;Acc:VGNC:92861]
ENSSSCG00000012309	Upregulated	228567	X	-	44302206	44543549	TCONS_00235974	12	6475	XLOC_065281	SHROOM4	shroom family member 4 [Source:VGNC Symbol;Acc:VGNC:92861]
ENSSSCG00000012309	Upregulated	228568	X	+	44329959	44340482	TCONS_00232026	3	4523	XLOC_064117	SHROOM4	shroom family member 4 [Source:VGNC Symbol;Acc:VGNC:92861]
ENSSSCG00000012309	Upregulated	228571	X	-	44330179	44543549	TCONS_00235975	10	8201	XLOC_065281	SHROOM4	shroom family member 4 [Source:VGNC Symbol;Acc:VGNC:92861]
ENSSSCG00000012309	Upregulated	228572	X	-	44330179	44543549	TCONS_00235976	10	8372	XLOC_065281	SHROOM4	shroom family member 4 [Source:VGNC Symbol;Acc:VGNC:92861]
ENSSSCG00000009745	Upregulated	185361	14	-	24059019	24072921	TCONS_00072583	7	4920	XLOC_019763	ADGRD1	adhesion G protein-coupled receptor D1 [Source:HGNC Symbol;Acc:HGNC:19893]
ENSSSCG00000009745	Upregulated	185362	14	-	24059019	24072921	TCONS_00072584	7	6162	XLOC_019763	ADGRD1	adhesion G protein-coupled receptor D1 [Source:HGNC Symbol;Acc:HGNC:19893]
ENSSSCG00000009745	Upregulated	185363	14	-	24059019	24119324	TCONS_00072585	7	2985	XLOC_019763	ADGRD1	adhesion G protein-coupled receptor D1 [Source:HGNC Symbol;Acc:HGNC:19893]
ENSSSCG00000009745	Upregulated	185364	14	-	24059019	24184378	TCONS_00072586	16	3966	XLOC_019763	ADGRD1	adhesion G protein-coupled receptor D1 [Source:HGNC Symbol;Acc:HGNC:19893]
ENSSSCG00000009745	Upregulated	185365	14	-	24059019	24241176	TCONS_00072587	26	6460	XLOC_019763	ADGRD1	adhesion G protein-coupled receptor D1 [Source:HGNC Symbol;Acc:HGNC:19893]
ENSSSCG00000009745	Upregulated	185366	14	-	24059019	24241176	TCONS_00072588	21	5169	XLOC_019763	ADGRD1	adhesion G protein-coupled receptor D1 [Source:HGNC Symbol;Acc:HGNC:19893]
ENSSSCG00000009745	Upregulated	185367	14	-	24059019	24241176	TCONS_00072589	27	5769	XLOC_019763	ADGRD1	adhesion G protein-coupled receptor D1 [Source:HGNC Symbol;Acc:HGNC:19893]
ENSSSCG00000009745	Upregulated	185368	14	-	24059019	24241176	TCONS_00072590	27	5769	XLOC_019763	ADGRD1	adhesion G protein-coupled receptor D1 [Source:HGNC Symbol;Acc:HGNC:19893]
ENSSSCG00000009745	Upregulated	185369	14	-	24059019	24241176	TCONS_00072591	22	5265	XLOC_019763	ADGRD1	adhesion G protein-coupled receptor D1 [Source:HGNC Symbol;Acc:HGNC:19893]
ENSSSCG00000009745	Upregulated	185370	14	-	24059019	24241176	TCONS_00072592	26	5673	XLOC_019763	ADGRD1	adhesion G protein-coupled receptor D1 [Source:HGNC Symbol;Acc:HGNC:19893]
ENSSSCG00000009745	Upregulated	185371	14	-	24059674	24072921	TCONS_00072593	6	5774	XLOC_019763	ADGRD1	adhesion G protein-coupled receptor D1 [Source:HGNC Symbol;Acc:HGNC:19893]
ENSSSCG00000009745	Upregulated	185372	14	-	24059674	24241125	TCONS_00072594	26	5330	XLOC_019763	ADGRD1	adhesion G protein-coupled receptor D1 [Source:HGNC Symbol;Acc:HGNC:19893]
ENSSSCG00000009745	Upregulated	185373	14	+	24059734	24061384	TCONS_00065133	1	1651	XLOC_017931	ADGRD1	adhesion G protein-coupled receptor D1 [Source:HGNC Symbol;Acc:HGNC:19893]
ENSSSCG00000009745	Upregulated	185374	14	-	24062576	24241176	TCONS_00072595	25	3170	XLOC_019763	ADGRD1	adhesion G protein-coupled receptor D1 [Source:HGNC Symbol;Acc:HGNC:19893]
ENSSSCG00000009745	Upregulated	185375	14	+	24066947	24081450	TCONS_00065134	3	188	XLOC_017932	ADGRD1	adhesion G protein-coupled receptor D1 [Source:HGNC Symbol;Acc:HGNC:19893]
ENSSSCG00000034000	Upregulated	12056	1	-	157781827	157937636	TCONS_00017085	9	1376	XLOC_004712	ENSSSCG00000034000
ENSSSCG00000034000	Upregulated	12091	1	+	157917296	157942953	TCONS_00005896	9	7261	XLOC_001639	ENSSSCG00000034000
ENSSSCG00000034000	Upregulated	12092	1	+	157917378	157933014	TCONS_00005897	7	6493	XLOC_001639	ENSSSCG00000034000
ENSSSCG00000034000	Upregulated	12093	1	+	157917378	157937170	TCONS_00005898	7	6598	XLOC_001639	ENSSSCG00000034000
ENSSSCG00000034000	Upregulated	12094	1	+	157917378	157937170	TCONS_00005899	8	6754	XLOC_001639	ENSSSCG00000034000
ENSSSCG00000034000	Upregulated	12095	1	+	157917378	157942953	TCONS_00005900	9	7025	XLOC_001639	ENSSSCG00000034000
ENSSSCG00000034000	Upregulated	12096	1	+	157917378	157942953	TCONS_00005901	8	7023	XLOC_001639	ENSSSCG00000034000
ENSSSCG00000034000	Upregulated	12097	1	-	157918264	157937613	TCONS_00017111	7	5719	XLOC_004712	ENSSSCG00000034000
ENSSSCG00000034000	Upregulated	12098	1	-	157918264	157937633	TCONS_00017112	8	5895	XLOC_004712	ENSSSCG00000034000
ENSSSCG00000034000	Upregulated	12099	1	-	157920463	157937594	TCONS_00017113	8	3657	XLOC_004712	ENSSSCG00000034000
ENSSSCG00000051701	Upregulated	16082	1	+	208915182	209168985	TCONS_00007916	3	2239	XLOC_002273	ENSSSCG00000051701
ENSSSCG00000051701	Upregulated	16083	1	+	208915182	209169748	TCONS_00007917	3	3002	XLOC_002273	ENSSSCG00000051701
ENSSSCG00000051701	Upregulated	16084	1	+	208915182	209173777	TCONS_00007918	5	4119	XLOC_002273	ENSSSCG00000051701
ENSSSCG00000051701	Upregulated	16085	1	+	208915182	209173777	TCONS_00007919	4	4034	XLOC_002273	ENSSSCG00000051701
ENSSSCG00000051701	Upregulated	16087	1	-	208984450	209173706	TCONS_00019076	4	3663	XLOC_005290	ENSSSCG00000051701
ENSSSCG00000051701	Upregulated	16088	1	+	208987279	209169748	TCONS_00007920	3	2672	XLOC_002273	ENSSSCG00000051701
ENSSSCG00000051701	Upregulated	16089	1	+	209060325	209173777	TCONS_00007921	3	3127	XLOC_002273	ENSSSCG00000051701
ENSSSCG00000051701	Upregulated	16090	1	-	209143628	209173638	TCONS_00019077	3	3003	XLOC_005290	ENSSSCG00000051701
ENSSSCG00000011800	Upregulated	176690	13	+	124460272	124494196	TCONS_00051996	8	1309	XLOC_014363	FETUB	fetuin B [Source:VGNC Symbol;Acc:VGNC:88091]
ENSSSCG00000011800	Upregulated	176691	13	-	124472120	124493008	TCONS_00060822	8	993	XLOC_016638	FETUB	fetuin B [Source:VGNC Symbol;Acc:VGNC:88091]
ENSSSCG00000011800	Upregulated	176692	13	-	124472120	124493008	TCONS_00060823	8	1147	XLOC_016638	FETUB	fetuin B [Source:VGNC Symbol;Acc:VGNC:88091]
ENSSSCG00000011800	Upregulated	176693	13	-	124472120	124493074	TCONS_00060824	8	1213	XLOC_016638	FETUB	fetuin B [Source:VGNC Symbol;Acc:VGNC:88091]
ENSSSCG00000011800	Upregulated	176694	13	-	124472120	124494176	TCONS_00060825	8	1580	XLOC_016638	FETUB	fetuin B [Source:VGNC Symbol;Acc:VGNC:88091]
ENSSSCG00000011800	Upregulated	176695	13	-	124472120	124494176	TCONS_00060826	8	1426	XLOC_016638	FETUB	fetuin B [Source:VGNC Symbol;Acc:VGNC:88091]
ENSSSCG00000011800	Upregulated	176696	13	-	124472120	124494176	TCONS_00060827	8	1463	XLOC_016638	FETUB	fetuin B [Source:VGNC Symbol;Acc:VGNC:88091]
ENSSSCG00000011800	Upregulated	176697	13	+	124472277	124494197	TCONS_00051997	8	1444	XLOC_014363	FETUB	fetuin B [Source:VGNC Symbol;Acc:VGNC:88091]
ENSSSCG00000011800	Upregulated	176698	13	+	124472344	124493030	TCONS_00051998	8	945	XLOC_014363	FETUB	fetuin B [Source:VGNC Symbol;Acc:VGNC:88091]
ENSSSCG00000011800	Upregulated	176699	13	+	124472362	124494197	TCONS_00051999	8	1205	XLOC_014363	FETUB	fetuin B [Source:VGNC Symbol;Acc:VGNC:88091]
ENSSSCG00000011800	Upregulated	176700	13	+	124472367	124494197	TCONS_00052000	8	1237	XLOC_014363	FETUB	fetuin B [Source:VGNC Symbol;Acc:VGNC:88091]
ENSSSCG00000011800	Upregulated	176701	13	+	124472401	124494197	TCONS_00052001	8	1320	XLOC_014363	FETUB	fetuin B [Source:VGNC Symbol;Acc:VGNC:88091]
ENSSSCG00000003754	Upregulated	101649	6	+	128704958	128722876	TCONS_00177221	11	2165	XLOC_047938	ENSSSCG00000003754	cytochrome P450 family 4 subfamily A member 90 [Source:VGNC Symbol;Acc:VGNC:103358]
ENSSSCG00000003754	Upregulated	101650	6	+	128704958	128722876	TCONS_00177222	12	2320	XLOC_047938	ENSSSCG00000003754	cytochrome P450 family 4 subfamily A member 90 [Source:VGNC Symbol;Acc:VGNC:103358]
ENSSSCG00000003754	Upregulated	101651	6	+	128704958	128722876	TCONS_00177223	12	2320	XLOC_047938	ENSSSCG00000003754	cytochrome P450 family 4 subfamily A member 90 [Source:VGNC Symbol;Acc:VGNC:103358]
ENSSSCG00000003754	Upregulated	101652	6	-	128704964	128723022	TCONS_00188084	12	2460	XLOC_050720	ENSSSCG00000003754	cytochrome P450 family 4 subfamily A member 90 [Source:VGNC Symbol;Acc:VGNC:103358]
ENSSSCG00000003754	Upregulated	101653	6	-	128711921	128722829	TCONS_00188085	11	1996	XLOC_050720	ENSSSCG00000003754	cytochrome P450 family 4 subfamily A member 90 [Source:VGNC Symbol;Acc:VGNC:103358]
ENSSSCG00000037156	Upregulated	218450	17	+	47626457	47643074	TCONS_00096789	13	4479	XLOC_026551	RBPJL	recombination signal binding protein for immunoglobulin kappa J region like [Source:HGNC Symbol;Acc:HGNC:13761]
ENSSSCG00000037156	Upregulated	218451	17	+	47628596	47640654	TCONS_00096790	12	1747	XLOC_026551	RBPJL	recombination signal binding protein for immunoglobulin kappa J region like [Source:HGNC Symbol;Acc:HGNC:13761]
ENSSSCG00000037156	Upregulated	218453	17	+	47631700	47643074	TCONS_00096792	9	5816	XLOC_026551	RBPJL	recombination signal binding protein for immunoglobulin kappa J region like [Source:HGNC Symbol;Acc:HGNC:13761]
ENSSSCG00000003590	Upregulated	97986	6	+	86137737	86223364	TCONS_00175450	27	4363	XLOC_047520	PTPRU	protein tyrosine phosphatase receptor type U [Source:VGNC Symbol;Acc:VGNC:91995]
ENSSSCG00000003590	Upregulated	97987	6	+	86137737	86228146	TCONS_00175451	30	5596	XLOC_047520	PTPRU	protein tyrosine phosphatase receptor type U [Source:VGNC Symbol;Acc:VGNC:91995]
ENSSSCG00000003590	Upregulated	97988	6	+	86137737	86228146	TCONS_00175452	31	5608	XLOC_047520	PTPRU	protein tyrosine phosphatase receptor type U [Source:VGNC Symbol;Acc:VGNC:91995]
ENSSSCG00000003590	Upregulated	97989	6	+	86137737	86228146	TCONS_00175453	29	5479	XLOC_047520	PTPRU	protein tyrosine phosphatase receptor type U [Source:VGNC Symbol;Acc:VGNC:91995]
ENSSSCG00000003590	Upregulated	97990	6	+	86137737	86228149	TCONS_00175454	30	5590	XLOC_047520	PTPRU	protein tyrosine phosphatase receptor type U [Source:VGNC Symbol;Acc:VGNC:91995]
ENSSSCG00000003590	Upregulated	97991	6	+	86137737	86228149	TCONS_00175455	30	5593	XLOC_047520	PTPRU	protein tyrosine phosphatase receptor type U [Source:VGNC Symbol;Acc:VGNC:91995]
ENSSSCG00000003590	Upregulated	97992	6	+	86137737	86228149	TCONS_00175456	30	5584	XLOC_047520	PTPRU	protein tyrosine phosphatase receptor type U [Source:VGNC Symbol;Acc:VGNC:91995]
ENSSSCG00000003590	Upregulated	97993	6	+	86137769	86228140	TCONS_00175457	31	5588	XLOC_047520	PTPRU	protein tyrosine phosphatase receptor type U [Source:VGNC Symbol;Acc:VGNC:91995]
ENSSSCG00000003590	Upregulated	97994	6	+	86140517	86228149	TCONS_00175458	29	5298	XLOC_047520	PTPRU	protein tyrosine phosphatase receptor type U [Source:VGNC Symbol;Acc:VGNC:91995]
ENSSSCG00000003590	Upregulated	97995	6	-	86183018	86228144	TCONS_00186196	19	3505	XLOC_050277	PTPRU	protein tyrosine phosphatase receptor type U [Source:VGNC Symbol;Acc:VGNC:91995]
ENSSSCG00000003590	Upregulated	97996	6	-	86183018	86228144	TCONS_00186197	19	3514	XLOC_050277	PTPRU	protein tyrosine phosphatase receptor type U [Source:VGNC Symbol;Acc:VGNC:91995]
ENSSSCG00000003590	Upregulated	97997	6	-	86203140	86228144	TCONS_00186198	15	2901	XLOC_050277	PTPRU	protein tyrosine phosphatase receptor type U [Source:VGNC Symbol;Acc:VGNC:91995]
ENSSSCG00000003590	Upregulated	97998	6	+	86210384	86228149	TCONS_00175459	13	2673	XLOC_047520	PTPRU	protein tyrosine phosphatase receptor type U [Source:VGNC Symbol;Acc:VGNC:91995]
ENSSSCG00000003590	Upregulated	97999	6	-	86213316	86228144	TCONS_00186199	9	2285	XLOC_050277	PTPRU	protein tyrosine phosphatase receptor type U [Source:VGNC Symbol;Acc:VGNC:91995]
ENSSSCG00000003590	Upregulated	98000	6	+	86217943	86228149	TCONS_00175460	7	1981	XLOC_047520	PTPRU	protein tyrosine phosphatase receptor type U [Source:VGNC Symbol;Acc:VGNC:91995]
ENSSSCG00000003590	Upregulated	98001	6	+	86217956	86228149	TCONS_00175461	7	1974	XLOC_047520	PTPRU	protein tyrosine phosphatase receptor type U [Source:VGNC Symbol;Acc:VGNC:91995]
ENSSSCG00000003590	Upregulated	98002	6	+	86218373	86228149	TCONS_00175462	7	1956	XLOC_047520	PTPRU	protein tyrosine phosphatase receptor type U [Source:VGNC Symbol;Acc:VGNC:91995]
ENSSSCG00000038228	Upregulated	50400	3	-	48529584	48644998	TCONS_00138937	12	4923	XLOC_037687	ENSSSCG00000038228
ENSSSCG00000038228	Upregulated	50401	3	-	48529584	48644998	TCONS_00138938	11	4652	XLOC_037687	ENSSSCG00000038228
ENSSSCG00000038228	Upregulated	50402	3	-	48529584	48648638	TCONS_00138939	11	4680	XLOC_037687	ENSSSCG00000038228
ENSSSCG00000038228	Upregulated	50403	3	-	48529584	48648638	TCONS_00138940	12	4840	XLOC_037687	ENSSSCG00000038228
ENSSSCG00000038228	Upregulated	50406	3	-	48598129	48644998	TCONS_00138942	10	3719	XLOC_037687	ENSSSCG00000038228
ENSSSCG00000038228	Upregulated	50407	3	-	48598129	48644998	TCONS_00138943	9	3425	XLOC_037687	ENSSSCG00000038228
ENSSSCG00000038228	Upregulated	50408	3	-	48598129	48648366	TCONS_00138944	9	2633	XLOC_037687	ENSSSCG00000038228
ENSSSCG00000038228	Upregulated	50409	3	-	48617598	48643530	TCONS_00138945	8	5069	XLOC_037687	ENSSSCG00000038228
ENSSSCG00000038228	Upregulated	50410	3	-	48617598	48644998	TCONS_00138946	9	6013	XLOC_037687	ENSSSCG00000038228
ENSSSCG00000038228	Upregulated	50411	3	-	48617598	48644998	TCONS_00138947	8	5719	XLOC_037687	ENSSSCG00000038228
ENSSSCG00000038228	Upregulated	50412	3	-	48617598	48644998	TCONS_00138948	9	5990	XLOC_037687	ENSSSCG00000038228
ENSSSCG00000038228	Upregulated	50413	3	-	48617598	48648638	TCONS_00138949	9	6041	XLOC_037687	ENSSSCG00000038228
ENSSSCG00000038228	Upregulated	50414	3	-	48617904	48648399	TCONS_00138950	8	5202	XLOC_037687	ENSSSCG00000038228
ENSSSCG00000037598	Upregulated	224673	18	-	46061863	46068582	TCONS_00106186	3	1247	XLOC_029226	SNX10	sorting nexin 10 [Source:VGNC Symbol;Acc:VGNC:93303]
ENSSSCG00000037598	Upregulated	224674	18	+	46061898	46068510	TCONS_00103495	3	1140	XLOC_028453	SNX10	sorting nexin 10 [Source:VGNC Symbol;Acc:VGNC:93303]
ENSSSCG00000037598	Upregulated	224675	18	-	46062698	46068525	TCONS_00106187	3	1176	XLOC_029226	SNX10	sorting nexin 10 [Source:VGNC Symbol;Acc:VGNC:93303]
ENSSSCG00000037598	Upregulated	224676	18	+	46062742	46068510	TCONS_00103496	4	681	XLOC_028453	SNX10	sorting nexin 10 [Source:VGNC Symbol;Acc:VGNC:93303]
ENSSSCG00000037598	Upregulated	224677	18	+	46062848	46142867	TCONS_00103497	8	691	XLOC_028453	SNX10	sorting nexin 10 [Source:VGNC Symbol;Acc:VGNC:93303]
ENSSSCG00000037598	Upregulated	224679	18	+	46063507	46067534	TCONS_00103499	1	4028	XLOC_028453	SNX10	sorting nexin 10 [Source:VGNC Symbol;Acc:VGNC:93303]
ENSSSCG00000037598	Upregulated	224680	18	+	46063507	46142867	TCONS_00103500	7	3489	XLOC_028453	SNX10	sorting nexin 10 [Source:VGNC Symbol;Acc:VGNC:93303]
ENSSSCG00000037598	Upregulated	224681	18	+	46063507	46142867	TCONS_00103501	7	3506	XLOC_028453	SNX10	sorting nexin 10 [Source:VGNC Symbol;Acc:VGNC:93303]
ENSSSCG00000037598	Upregulated	224682	18	-	46064411	46067404	TCONS_00106188	2	2541	XLOC_029226	SNX10	sorting nexin 10 [Source:VGNC Symbol;Acc:VGNC:93303]
ENSSSCG00000037598	Upregulated	224683	18	-	46064411	46142945	TCONS_00106189	8	2771	XLOC_029226	SNX10	sorting nexin 10 [Source:VGNC Symbol;Acc:VGNC:93303]
ENSSSCG00000037598	Upregulated	224684	18	-	46064411	46142945	TCONS_00106190	8	2771	XLOC_029226	SNX10	sorting nexin 10 [Source:VGNC Symbol;Acc:VGNC:93303]
ENSSSCG00000037598	Upregulated	224685	18	-	46064411	46142945	TCONS_00106191	7	2663	XLOC_029226	SNX10	sorting nexin 10 [Source:VGNC Symbol;Acc:VGNC:93303]
ENSSSCG00000037598	Upregulated	224686	18	-	46064411	46142945	TCONS_00106192	7	3224	XLOC_029226	SNX10	sorting nexin 10 [Source:VGNC Symbol;Acc:VGNC:93303]
ENSSSCG00000037598	Upregulated	224687	18	-	46064411	46142945	TCONS_00106193	7	2663	XLOC_029226	SNX10	sorting nexin 10 [Source:VGNC Symbol;Acc:VGNC:93303]
ENSSSCG00000037598	Upregulated	224688	18	-	46064579	46142945	TCONS_00106194	8	2603	XLOC_029226	SNX10	sorting nexin 10 [Source:VGNC Symbol;Acc:VGNC:93303]
ENSSSCG00000037598	Upregulated	224689	18	+	46064643	46067534	TCONS_00103502	2	2439	XLOC_028453	SNX10	sorting nexin 10 [Source:VGNC Symbol;Acc:VGNC:93303]
ENSSSCG00000037598	Upregulated	224690	18	+	46064679	46067534	TCONS_00103503	2	2391	XLOC_028453	SNX10	sorting nexin 10 [Source:VGNC Symbol;Acc:VGNC:93303]
ENSSSCG00000016258	Upregulated	206578	15	-	130414161	130548321	TCONS_00088342	8	1978	XLOC_023921	DNER	delta/notch like EGF repeat containing [Source:VGNC Symbol;Acc:VGNC:96041]
ENSSSCG00000016258	Upregulated	206579	15	-	130414161	130585889	TCONS_00088343	10	2310	XLOC_023921	DNER	delta/notch like EGF repeat containing [Source:VGNC Symbol;Acc:VGNC:96041]
ENSSSCG00000016258	Upregulated	206580	15	-	130414161	130706516	TCONS_00088344	13	2881	XLOC_023921	DNER	delta/notch like EGF repeat containing [Source:VGNC Symbol;Acc:VGNC:96041]
ENSSSCG00000016258	Upregulated	206581	15	-	130414161	130754051	TCONS_00088345	13	3845	XLOC_023921	DNER	delta/notch like EGF repeat containing [Source:VGNC Symbol;Acc:VGNC:96041]
ENSSSCG00000016258	Upregulated	206582	15	-	130414161	130754051	TCONS_00088346	13	3845	XLOC_023921	DNER	delta/notch like EGF repeat containing [Source:VGNC Symbol;Acc:VGNC:96041]
ENSSSCG00000016258	Upregulated	206583	15	-	130414161	130754051	TCONS_00088347	13	3845	XLOC_023921	DNER	delta/notch like EGF repeat containing [Source:VGNC Symbol;Acc:VGNC:96041]
ENSSSCG00000016258	Upregulated	206584	15	-	130414161	130754051	TCONS_00088348	13	3845	XLOC_023921	DNER	delta/notch like EGF repeat containing [Source:VGNC Symbol;Acc:VGNC:96041]
ENSSSCG00000016258	Upregulated	206585	15	-	130414161	130754051	TCONS_00088349	13	3845	XLOC_023921	DNER	delta/notch like EGF repeat containing [Source:VGNC Symbol;Acc:VGNC:96041]
ENSSSCG00000016258	Upregulated	206586	15	-	130414161	130754051	TCONS_00088350	13	3845	XLOC_023921	DNER	delta/notch like EGF repeat containing [Source:VGNC Symbol;Acc:VGNC:96041]
ENSSSCG00000016258	Upregulated	206587	15	-	130414161	130754051	TCONS_00088351	13	3845	XLOC_023921	DNER	delta/notch like EGF repeat containing [Source:VGNC Symbol;Acc:VGNC:96041]
ENSSSCG00000016258	Upregulated	206588	15	-	130414161	130754051	TCONS_00088352	13	3845	XLOC_023921	DNER	delta/notch like EGF repeat containing [Source:VGNC Symbol;Acc:VGNC:96041]
ENSSSCG00000016258	Upregulated	206589	15	-	130414161	130754051	TCONS_00088353	13	3845	XLOC_023921	DNER	delta/notch like EGF repeat containing [Source:VGNC Symbol;Acc:VGNC:96041]
ENSSSCG00000016258	Upregulated	206590	15	-	130414161	130754051	TCONS_00088354	13	3845	XLOC_023921	DNER	delta/notch like EGF repeat containing [Source:VGNC Symbol;Acc:VGNC:96041]
ENSSSCG00000016258	Upregulated	206591	15	-	130414161	130754051	TCONS_00088355	13	3845	XLOC_023921	DNER	delta/notch like EGF repeat containing [Source:VGNC Symbol;Acc:VGNC:96041]
ENSSSCG00000016258	Upregulated	206592	15	-	130414161	130754051	TCONS_00088356	13	3845	XLOC_023921	DNER	delta/notch like EGF repeat containing [Source:VGNC Symbol;Acc:VGNC:96041]
ENSSSCG00000016258	Upregulated	206593	15	+	130414207	130496460	TCONS_00083039	6	1606	XLOC_022468	DNER	delta/notch like EGF repeat containing [Source:VGNC Symbol;Acc:VGNC:96041]
ENSSSCG00000016258	Upregulated	206597	15	+	130414245	130433482	TCONS_00083043	2	1058	XLOC_022468	DNER	delta/notch like EGF repeat containing [Source:VGNC Symbol;Acc:VGNC:96041]
ENSSSCG00000025013	Upregulated	14851	1	-	188704260	188718424	TCONS_00018530	7	1414	XLOC_005063	RTN1	reticulon 1 [Source:VGNC Symbol;Acc:VGNC:103169]
ENSSSCG00000025013	Upregulated	14852	1	-	188704260	188729714	TCONS_00018531	7	1572	XLOC_005063	RTN1	reticulon 1 [Source:VGNC Symbol;Acc:VGNC:103169]
ENSSSCG00000025013	Upregulated	14853	1	-	188704260	188803375	TCONS_00018532	7	1451	XLOC_005063	RTN1	reticulon 1 [Source:VGNC Symbol;Acc:VGNC:103169]
ENSSSCG00000025013	Upregulated	14854	1	-	188704260	188828864	TCONS_00018533	9	2928	XLOC_005063	RTN1	reticulon 1 [Source:VGNC Symbol;Acc:VGNC:103169]
ENSSSCG00000025013	Upregulated	14855	1	-	188704260	188926087	TCONS_00018534	9	3377	XLOC_005063	RTN1	reticulon 1 [Source:VGNC Symbol;Acc:VGNC:103169]
ENSSSCG00000025013	Upregulated	14856	1	-	188704262	188926056	TCONS_00018535	9	3344	XLOC_005063	RTN1	reticulon 1 [Source:VGNC Symbol;Acc:VGNC:103169]
ENSSSCG00000025013	Upregulated	14857	1	+	188704284	188727388	TCONS_00007232	7	1429	XLOC_002027	RTN1	reticulon 1 [Source:VGNC Symbol;Acc:VGNC:103169]
ENSSSCG00000025013	Upregulated	14858	1	+	188704290	188804010	TCONS_00007233	7	2056	XLOC_002027	RTN1	reticulon 1 [Source:VGNC Symbol;Acc:VGNC:103169]
ENSSSCG00000025013	Upregulated	14859	1	+	188704290	188926235	TCONS_00007234	9	3495	XLOC_002027	RTN1	reticulon 1 [Source:VGNC Symbol;Acc:VGNC:103169]
ENSSSCG00000025013	Upregulated	14860	1	+	188704308	188828855	TCONS_00007235	9	2871	XLOC_002027	RTN1	reticulon 1 [Source:VGNC Symbol;Acc:VGNC:103169]
ENSSSCG00000025013	Upregulated	14861	1	+	188704320	188804010	TCONS_00007236	8	2156	XLOC_002027	RTN1	reticulon 1 [Source:VGNC Symbol;Acc:VGNC:103169]
ENSSSCG00000025013	Upregulated	14862	1	+	188704330	188926235	TCONS_00007237	7	1949	XLOC_002027	RTN1	reticulon 1 [Source:VGNC Symbol;Acc:VGNC:103169]
ENSSSCG00000025013	Upregulated	14863	1	+	188704337	188729604	TCONS_00007238	7	1385	XLOC_002027	RTN1	reticulon 1 [Source:VGNC Symbol;Acc:VGNC:103169]
ENSSSCG00000025013	Upregulated	14864	1	+	188704419	188718418	TCONS_00007239	7	1249	XLOC_002027	RTN1	reticulon 1 [Source:VGNC Symbol;Acc:VGNC:103169]
ENSSSCG00000025013	Upregulated	14865	1	+	188704421	188812484	TCONS_00007240	7	1245	XLOC_002027	RTN1	reticulon 1 [Source:VGNC Symbol;Acc:VGNC:103169]
ENSSSCG00000025013	Upregulated	14866	1	+	188704422	188729604	TCONS_00007241	7	1300	XLOC_002027	RTN1	reticulon 1 [Source:VGNC Symbol;Acc:VGNC:103169]
ENSSSCG00000025013	Upregulated	14867	1	+	188704451	188804010	TCONS_00007242	6	1687	XLOC_002027	RTN1	reticulon 1 [Source:VGNC Symbol;Acc:VGNC:103169]
ENSSSCG00000025013	Upregulated	14868	1	-	188709282	188926056	TCONS_00018536	9	2499	XLOC_005063	RTN1	reticulon 1 [Source:VGNC Symbol;Acc:VGNC:103169]
ENSSSCG00000025013	Upregulated	14869	1	-	188709282	188926087	TCONS_00018537	9	2530	XLOC_005063	RTN1	reticulon 1 [Source:VGNC Symbol;Acc:VGNC:103169]
ENSSSCG00000025013	Upregulated	14871	1	-	188809834	188926087	TCONS_00018539	3	4622	XLOC_005063	RTN1	reticulon 1 [Source:VGNC Symbol;Acc:VGNC:103169]
ENSSSCG00000025013	Upregulated	14872	1	+	188821138	188926235	TCONS_00007243	3	1410	XLOC_002027	RTN1	reticulon 1 [Source:VGNC Symbol;Acc:VGNC:103169]
ENSSSCG00000036177	Upregulated	77870	5	-	35127965	35293392	TCONS_00165430	12	5906	XLOC_044888	ENSSSCG00000036177	tetraspanin 8 [Source:VGNC Symbol;Acc:VGNC:94515]
ENSSSCG00000036177	Upregulated	77871	5	-	35186872	35293392	TCONS_00165431	14	6126	XLOC_044888	ENSSSCG00000036177	tetraspanin 8 [Source:VGNC Symbol;Acc:VGNC:94515]
ENSSSCG00000036177	Upregulated	77872	5	-	35186872	35293392	TCONS_00165432	13	6046	XLOC_044888	ENSSSCG00000036177	tetraspanin 8 [Source:VGNC Symbol;Acc:VGNC:94515]
ENSSSCG00000036177	Upregulated	77873	5	-	35194696	35293392	TCONS_00165433	12	5922	XLOC_044888	ENSSSCG00000036177	tetraspanin 8 [Source:VGNC Symbol;Acc:VGNC:94515]
ENSSSCG00000036177	Upregulated	77874	5	-	35194696	35293392	TCONS_00165434	12	1681	XLOC_044888	ENSSSCG00000036177	tetraspanin 8 [Source:VGNC Symbol;Acc:VGNC:94515]
ENSSSCG00000036177	Upregulated	77875	5	-	35194696	35293392	TCONS_00165435	13	1732	XLOC_044888	ENSSSCG00000036177	tetraspanin 8 [Source:VGNC Symbol;Acc:VGNC:94515]
ENSSSCG00000036177	Upregulated	77876	5	-	35199889	35327558	TCONS_00165436	14	5983	XLOC_044888	ENSSSCG00000036177	tetraspanin 8 [Source:VGNC Symbol;Acc:VGNC:94515]
ENSSSCG00000036177	Upregulated	77877	5	-	35199889	35462932	TCONS_00165437	13	2868	XLOC_044888	ENSSSCG00000036177	tetraspanin 8 [Source:VGNC Symbol;Acc:VGNC:94515]
ENSSSCG00000036177	Upregulated	77879	5	-	35211450	35293392	TCONS_00165439	12	6266	XLOC_044888	ENSSSCG00000036177	tetraspanin 8 [Source:VGNC Symbol;Acc:VGNC:94515]
ENSSSCG00000036177	Upregulated	77880	5	-	35211450	35293392	TCONS_00165440	15	6168	XLOC_044888	ENSSSCG00000036177	tetraspanin 8 [Source:VGNC Symbol;Acc:VGNC:94515]
ENSSSCG00000036177	Upregulated	77881	5	-	35212072	35293392	TCONS_00165441	12	6106	XLOC_044888	ENSSSCG00000036177	tetraspanin 8 [Source:VGNC Symbol;Acc:VGNC:94515]
ENSSSCG00000036177	Upregulated	77882	5	-	35212072	35293392	TCONS_00165442	13	2631	XLOC_044888	ENSSSCG00000036177	tetraspanin 8 [Source:VGNC Symbol;Acc:VGNC:94515]
ENSSSCG00000036177	Upregulated	77883	5	-	35212072	35293392	TCONS_00165443	11	6660	XLOC_044888	ENSSSCG00000036177	tetraspanin 8 [Source:VGNC Symbol;Acc:VGNC:94515]
ENSSSCG00000036177	Upregulated	77884	5	-	35212072	35293392	TCONS_00165444	12	6653	XLOC_044888	ENSSSCG00000036177	tetraspanin 8 [Source:VGNC Symbol;Acc:VGNC:94515]
ENSSSCG00000036177	Upregulated	77885	5	-	35212072	35293392	TCONS_00165445	12	2580	XLOC_044888	ENSSSCG00000036177	tetraspanin 8 [Source:VGNC Symbol;Acc:VGNC:94515]
ENSSSCG00000036177	Upregulated	77886	5	-	35212072	35293392	TCONS_00165446	12	6711	XLOC_044888	ENSSSCG00000036177	tetraspanin 8 [Source:VGNC Symbol;Acc:VGNC:94515]
ENSSSCG00000036177	Upregulated	77887	5	-	35212072	35321818	TCONS_00165447	11	6626	XLOC_044888	ENSSSCG00000036177	tetraspanin 8 [Source:VGNC Symbol;Acc:VGNC:94515]
ENSSSCG00000036177	Upregulated	77888	5	+	35212162	35243347	TCONS_00159351	2	3526	XLOC_043226	ENSSSCG00000036177	tetraspanin 8 [Source:VGNC Symbol;Acc:VGNC:94515]
ENSSSCG00000036177	Upregulated	77889	5	+	35212898	35247273	TCONS_00159352	4	928	XLOC_043226	ENSSSCG00000036177	tetraspanin 8 [Source:VGNC Symbol;Acc:VGNC:94515]
ENSSSCG00000036177	Upregulated	77890	5	+	35222630	35243347	TCONS_00159353	3	2751	XLOC_043226	ENSSSCG00000036177	tetraspanin 8 [Source:VGNC Symbol;Acc:VGNC:94515]
ENSSSCG00000036177	Upregulated	77891	5	+	35222630	35247273	TCONS_00159354	5	889	XLOC_043226	ENSSSCG00000036177	tetraspanin 8 [Source:VGNC Symbol;Acc:VGNC:94515]
ENSSSCG00000036177	Upregulated	77892	5	-	35238179	35319992	TCONS_00165448	11	5699	XLOC_044888	ENSSSCG00000036177	tetraspanin 8 [Source:VGNC Symbol;Acc:VGNC:94515]
ENSSSCG00000036177	Upregulated	77893	5	-	35238179	35321837	TCONS_00165449	11	5712	XLOC_044888	ENSSSCG00000036177	tetraspanin 8 [Source:VGNC Symbol;Acc:VGNC:94515]
ENSSSCG00000036177	Upregulated	77894	5	+	35240297	35243347	TCONS_00159355	3	2767	XLOC_043226	ENSSSCG00000036177	tetraspanin 8 [Source:VGNC Symbol;Acc:VGNC:94515]
ENSSSCG00000036177	Upregulated	77895	5	-	35240302	35463018	TCONS_00165450	11	7130	XLOC_044888	ENSSSCG00000036177	tetraspanin 8 [Source:VGNC Symbol;Acc:VGNC:94515]
ENSSSCG00000036177	Upregulated	77896	5	-	35240328	35293392	TCONS_00165451	10	6064	XLOC_044888	ENSSSCG00000036177	tetraspanin 8 [Source:VGNC Symbol;Acc:VGNC:94515]
ENSSSCG00000006696	Upregulated	68584	4	+	99799736	99921999	TCONS_00148069	4	387	XLOC_040185	GJA5	gap junction protein alpha 5 [Source:VGNC Symbol;Acc:VGNC:88460]
ENSSSCG00000006696	Upregulated	68585	4	+	99854392	99871285	TCONS_00148070	3	3393	XLOC_040185	GJA5	gap junction protein alpha 5 [Source:VGNC Symbol;Acc:VGNC:88460]
ENSSSCG00000006696	Upregulated	68586	4	+	99854392	99871288	TCONS_00148071	2	3262	XLOC_040185	GJA5	gap junction protein alpha 5 [Source:VGNC Symbol;Acc:VGNC:88460]
ENSSSCG00000006696	Upregulated	68587	4	+	99854392	99871337	TCONS_00148072	4	2410	XLOC_040185	GJA5	gap junction protein alpha 5 [Source:VGNC Symbol;Acc:VGNC:88460]
ENSSSCG00000006696	Upregulated	68588	4	+	99854392	99921999	TCONS_00148073	5	1189	XLOC_040185	GJA5	gap junction protein alpha 5 [Source:VGNC Symbol;Acc:VGNC:88460]
ENSSSCG00000006696	Upregulated	68589	4	-	99862496	99922162	TCONS_00154698	3	659	XLOC_041959	GJA5	gap junction protein alpha 5 [Source:VGNC Symbol;Acc:VGNC:88460]
ENSSSCG00000006696	Upregulated	68590	4	-	99867398	99870036	TCONS_00154699	2	1915	XLOC_041959	GJA5	gap junction protein alpha 5 [Source:VGNC Symbol;Acc:VGNC:88460]
ENSSSCG00000006696	Upregulated	68591	4	-	99867398	99921862	TCONS_00154700	3	1547	XLOC_041959	GJA5	gap junction protein alpha 5 [Source:VGNC Symbol;Acc:VGNC:88460]
ENSSSCG00000006696	Upregulated	68592	4	-	99870341	99870671	TCONS_00154701	1	331	XLOC_041960	GJA5	gap junction protein alpha 5 [Source:VGNC Symbol;Acc:VGNC:88460]
ENSSSCG00000012915	Upregulated	23722	2	+	5143582	5152748	TCONS_00107491	3	2412	XLOC_029563	ENSSSCG00000012915	cardiotrophin like cytokine factor 1 [Source:VGNC Symbol;Acc:VGNC:86725]
ENSSSCG00000012915	Upregulated	23723	2	+	5143582	5177711	TCONS_00107492	4	3695	XLOC_029563	ENSSSCG00000012915	cardiotrophin like cytokine factor 1 [Source:VGNC Symbol;Acc:VGNC:86725]
ENSSSCG00000012915	Upregulated	23724	2	+	5146848	5152748	TCONS_00107493	3	1745	XLOC_029563	ENSSSCG00000012915	cardiotrophin like cytokine factor 1 [Source:VGNC Symbol;Acc:VGNC:86725]
ENSSSCG00000040650	Upregulated	140653	9	+	131960573	132322206	TCONS_00219387	11	2240	XLOC_059547	ENSSSCG00000040650
ENSSSCG00000040650	Upregulated	140654	9	+	131960573	132334976	TCONS_00219388	11	3143	XLOC_059547	ENSSSCG00000040650
ENSSSCG00000040650	Upregulated	140655	9	+	131960573	132342813	TCONS_00219389	10	10783	XLOC_059547	ENSSSCG00000040650
ENSSSCG00000040650	Upregulated	140656	9	+	131960573	132342813	TCONS_00219390	11	10817	XLOC_059547	ENSSSCG00000040650
ENSSSCG00000040650	Upregulated	140657	9	+	131960573	132342813	TCONS_00219391	11	10980	XLOC_059547	ENSSSCG00000040650
ENSSSCG00000040650	Upregulated	140658	9	+	131960573	132342813	TCONS_00219392	11	10899	XLOC_059547	ENSSSCG00000040650
ENSSSCG00000040650	Upregulated	140659	9	-	131960705	132216101	TCONS_00225498	7	1160	XLOC_061306	ENSSSCG00000040650
ENSSSCG00000040650	Upregulated	140660	9	-	131960705	132221819	TCONS_00225499	9	1664	XLOC_061306	ENSSSCG00000040650
ENSSSCG00000040650	Upregulated	140661	9	+	131966000	132342813	TCONS_00219393	11	10780	XLOC_059547	ENSSSCG00000040650
ENSSSCG00000040650	Upregulated	140662	9	+	131989870	132342813	TCONS_00219394	11	10759	XLOC_059547	ENSSSCG00000040650
ENSSSCG00000040650	Upregulated	140663	9	-	131989874	132216116	TCONS_00225500	8	1475	XLOC_061306	ENSSSCG00000040650
ENSSSCG00000008888	Upregulated	123199	8	-	52152651	52162943	TCONS_00210624	3	3086	XLOC_057057	NPY1R	neuropeptide Y receptor Y1 [Source:VGNC Symbol;Acc:VGNC:90865]
ENSSSCG00000008888	Upregulated	123200	8	-	52152651	52162943	TCONS_00210625	4	3294	XLOC_057057	NPY1R	neuropeptide Y receptor Y1 [Source:VGNC Symbol;Acc:VGNC:90865]
ENSSSCG00000008888	Upregulated	123201	8	+	52152653	52161618	TCONS_00205891	3	3018	XLOC_055691	NPY1R	neuropeptide Y receptor Y1 [Source:VGNC Symbol;Acc:VGNC:90865]
ENSSSCG00000008888	Upregulated	123202	8	+	52152653	52162784	TCONS_00205892	3	2925	XLOC_055691	NPY1R	neuropeptide Y receptor Y1 [Source:VGNC Symbol;Acc:VGNC:90865]
ENSSSCG00000048324	Upregulated	119491	7	+	120016829	120019616	TCONS_00196870	2	2402	XLOC_053179	ENSSSCG00000048324
ENSSSCG00000048324	Upregulated	119492	7	+	120016877	120019616	TCONS_00196871	1	2740	XLOC_053179	ENSSSCG00000048324
ENSSSCG00000048324	Upregulated	119493	7	-	120017050	120019383	TCONS_00204146	3	1677	XLOC_055138	ENSSSCG00000048324
ENSSSCG00000048324	Upregulated	119494	7	-	120017050	120019384	TCONS_00204147	2	1949	XLOC_055138	ENSSSCG00000048324
ENSSSCG00000048324	Upregulated	119495	7	-	120017050	120024533	TCONS_00204148	5	1978	XLOC_055138	ENSSSCG00000048324
ENSSSCG00000048324	Upregulated	119496	7	-	120017050	120024533	TCONS_00204149	4	2364	XLOC_055138	ENSSSCG00000048324
ENSSSCG00000048324	Upregulated	119497	7	-	120017050	120024533	TCONS_00204150	3	2635	XLOC_055138	ENSSSCG00000048324
ENSSSCG00000048324	Upregulated	119498	7	-	120018279	120024533	TCONS_00204151	4	1135	XLOC_055138	ENSSSCG00000048324
ENSSSCG00000048324	Upregulated	119499	7	-	120022178	120024533	TCONS_00204152	4	1717	XLOC_055138	ENSSSCG00000048324
ENSSSCG00000014259	Upregulated	39251	2	+	132145389	132409915	TCONS_00115064	23	4001	XLOC_031514	ADAMTS19	ADAM metallopeptidase with thrombospondin type 1 motif 19 [Source:VGNC Symbol;Acc:VGNC:96786]
ENSSSCG00000014259	Upregulated	39252	2	+	132145389	132410878	TCONS_00115065	23	4957	XLOC_031514	ADAMTS19	ADAM metallopeptidase with thrombospondin type 1 motif 19 [Source:VGNC Symbol;Acc:VGNC:96786]
ENSSSCG00000014259	Upregulated	39253	2	+	132145389	132410878	TCONS_00115066	23	4960	XLOC_031514	ADAMTS19	ADAM metallopeptidase with thrombospondin type 1 motif 19 [Source:VGNC Symbol;Acc:VGNC:96786]
ENSSSCG00000014259	Upregulated	39254	2	+	132145389	132410878	TCONS_00115067	23	4964	XLOC_031514	ADAMTS19	ADAM metallopeptidase with thrombospondin type 1 motif 19 [Source:VGNC Symbol;Acc:VGNC:96786]
ENSSSCG00000014259	Upregulated	39255	2	+	132145389	132410878	TCONS_00115068	23	4964	XLOC_031514	ADAMTS19	ADAM metallopeptidase with thrombospondin type 1 motif 19 [Source:VGNC Symbol;Acc:VGNC:96786]
ENSSSCG00000014259	Upregulated	39256	2	+	132145389	132410878	TCONS_00115069	23	4887	XLOC_031514	ADAMTS19	ADAM metallopeptidase with thrombospondin type 1 motif 19 [Source:VGNC Symbol;Acc:VGNC:96786]
ENSSSCG00000014259	Upregulated	39257	2	+	132145389	132410878	TCONS_00115070	23	4964	XLOC_031514	ADAMTS19	ADAM metallopeptidase with thrombospondin type 1 motif 19 [Source:VGNC Symbol;Acc:VGNC:96786]
ENSSSCG00000014259	Upregulated	39258	2	+	132145389	132410878	TCONS_00115071	23	4982	XLOC_031514	ADAMTS19	ADAM metallopeptidase with thrombospondin type 1 motif 19 [Source:VGNC Symbol;Acc:VGNC:96786]
ENSSSCG00000014259	Upregulated	39259	2	+	132145389	132410878	TCONS_00115072	22	4759	XLOC_031514	ADAMTS19	ADAM metallopeptidase with thrombospondin type 1 motif 19 [Source:VGNC Symbol;Acc:VGNC:96786]
ENSSSCG00000014259	Upregulated	39260	2	+	132145862	132410878	TCONS_00115073	23	4742	XLOC_031514	ADAMTS19	ADAM metallopeptidase with thrombospondin type 1 motif 19 [Source:VGNC Symbol;Acc:VGNC:96786]
ENSSSCG00000014259	Upregulated	39261	2	-	132146792	132410768	TCONS_00125097	22	4055	XLOC_034068	ADAMTS19	ADAM metallopeptidase with thrombospondin type 1 motif 19 [Source:VGNC Symbol;Acc:VGNC:96786]
ENSSSCG00000014259	Upregulated	39262	2	-	132146792	132410768	TCONS_00125098	21	3879	XLOC_034068	ADAMTS19	ADAM metallopeptidase with thrombospondin type 1 motif 19 [Source:VGNC Symbol;Acc:VGNC:96786]
ENSSSCG00000014259	Upregulated	39263	2	-	132146792	132410768	TCONS_00125099	22	4084	XLOC_034068	ADAMTS19	ADAM metallopeptidase with thrombospondin type 1 motif 19 [Source:VGNC Symbol;Acc:VGNC:96786]
ENSSSCG00000014259	Upregulated	39264	2	+	132210631	132410878	TCONS_00115074	20	3824	XLOC_031514	ADAMTS19	ADAM metallopeptidase with thrombospondin type 1 motif 19 [Source:VGNC Symbol;Acc:VGNC:96786]
ENSSSCG00000014259	Upregulated	39265	2	+	132210650	132410878	TCONS_00115075	19	3605	XLOC_031514	ADAMTS19	ADAM metallopeptidase with thrombospondin type 1 motif 19 [Source:VGNC Symbol;Acc:VGNC:96786]
ENSSSCG00000014259	Upregulated	39266	2	+	132210653	132410878	TCONS_00115076	20	3807	XLOC_031514	ADAMTS19	ADAM metallopeptidase with thrombospondin type 1 motif 19 [Source:VGNC Symbol;Acc:VGNC:96786]
ENSSSCG00000014259	Upregulated	39267	2	+	132210665	132364964	TCONS_00115077	16	1794	XLOC_031514	ADAMTS19	ADAM metallopeptidase with thrombospondin type 1 motif 19 [Source:VGNC Symbol;Acc:VGNC:96786]
ENSSSCG00000014259	Upregulated	39268	2	+	132229888	132410878	TCONS_00115078	18	3574	XLOC_031514	ADAMTS19	ADAM metallopeptidase with thrombospondin type 1 motif 19 [Source:VGNC Symbol;Acc:VGNC:96786]
ENSSSCG00000014259	Upregulated	39269	2	-	132309548	132362536	TCONS_00125100	8	786	XLOC_034068	ADAMTS19	ADAM metallopeptidase with thrombospondin type 1 motif 19 [Source:VGNC Symbol;Acc:VGNC:96786]
ENSSSCG00000014259	Upregulated	39270	2	-	132309548	132379491	TCONS_00125101	10	1071	XLOC_034068	ADAMTS19	ADAM metallopeptidase with thrombospondin type 1 motif 19 [Source:VGNC Symbol;Acc:VGNC:96786]
ENSSSCG00000014259	Upregulated	39271	2	-	132309548	132410768	TCONS_00125102	13	2812	XLOC_034068	ADAMTS19	ADAM metallopeptidase with thrombospondin type 1 motif 19 [Source:VGNC Symbol;Acc:VGNC:96786]
ENSSSCG00000014259	Upregulated	39272	2	+	132341130	132410878	TCONS_00115079	8	2414	XLOC_031514	ADAMTS19	ADAM metallopeptidase with thrombospondin type 1 motif 19 [Source:VGNC Symbol;Acc:VGNC:96786]
ENSSSCG00000014259	Upregulated	39273	2	+	132362522	132410878	TCONS_00115080	7	2257	XLOC_031514	ADAMTS19	ADAM metallopeptidase with thrombospondin type 1 motif 19 [Source:VGNC Symbol;Acc:VGNC:96786]
ENSSSCG00000014259	Upregulated	39274	2	+	132362737	132410878	TCONS_00115081	7	2219	XLOC_031514	ADAMTS19	ADAM metallopeptidase with thrombospondin type 1 motif 19 [Source:VGNC Symbol;Acc:VGNC:96786]
ENSSSCG00000014259	Upregulated	39275	2	+	132363175	132410878	TCONS_00115082	7	2212	XLOC_031514	ADAMTS19	ADAM metallopeptidase with thrombospondin type 1 motif 19 [Source:VGNC Symbol;Acc:VGNC:96786]
ENSSSCG00000009320	Upregulated	148910	11	-	5620700	5795264	TCONS_00032018	30	6703	XLOC_009271	FLT1	fms related receptor tyrosine kinase 1 [Source:VGNC Symbol;Acc:VGNC:88162]
ENSSSCG00000009320	Upregulated	148911	11	-	5620700	5795264	TCONS_00032019	29	6571	XLOC_009271	FLT1	fms related receptor tyrosine kinase 1 [Source:VGNC Symbol;Acc:VGNC:88162]
ENSSSCG00000009320	Upregulated	148912	11	-	5620700	5795264	TCONS_00032020	29	6598	XLOC_009271	FLT1	fms related receptor tyrosine kinase 1 [Source:VGNC Symbol;Acc:VGNC:88162]
ENSSSCG00000009320	Upregulated	148913	11	-	5620700	5795264	TCONS_00032021	29	6571	XLOC_009271	FLT1	fms related receptor tyrosine kinase 1 [Source:VGNC Symbol;Acc:VGNC:88162]
ENSSSCG00000009320	Upregulated	148914	11	-	5620700	5795264	TCONS_00032022	30	6703	XLOC_009271	FLT1	fms related receptor tyrosine kinase 1 [Source:VGNC Symbol;Acc:VGNC:88162]
ENSSSCG00000009320	Upregulated	148915	11	-	5620700	5795264	TCONS_00032023	29	6598	XLOC_009271	FLT1	fms related receptor tyrosine kinase 1 [Source:VGNC Symbol;Acc:VGNC:88162]
ENSSSCG00000009320	Upregulated	148916	11	-	5620700	5795264	TCONS_00032024	29	6571	XLOC_009271	FLT1	fms related receptor tyrosine kinase 1 [Source:VGNC Symbol;Acc:VGNC:88162]
ENSSSCG00000009320	Upregulated	148917	11	-	5620700	5795264	TCONS_00032025	29	6571	XLOC_009271	FLT1	fms related receptor tyrosine kinase 1 [Source:VGNC Symbol;Acc:VGNC:88162]
ENSSSCG00000009320	Upregulated	148918	11	-	5620700	5795264	TCONS_00032026	30	6703	XLOC_009271	FLT1	fms related receptor tyrosine kinase 1 [Source:VGNC Symbol;Acc:VGNC:88162]
ENSSSCG00000009320	Upregulated	148919	11	-	5620700	5795264	TCONS_00032027	29	6598	XLOC_009271	FLT1	fms related receptor tyrosine kinase 1 [Source:VGNC Symbol;Acc:VGNC:88162]
ENSSSCG00000009320	Upregulated	148920	11	-	5620700	5795264	TCONS_00032028	29	6598	XLOC_009271	FLT1	fms related receptor tyrosine kinase 1 [Source:VGNC Symbol;Acc:VGNC:88162]
ENSSSCG00000009320	Upregulated	148921	11	-	5620700	5795264	TCONS_00032029	29	6598	XLOC_009271	FLT1	fms related receptor tyrosine kinase 1 [Source:VGNC Symbol;Acc:VGNC:88162]
ENSSSCG00000009320	Upregulated	148922	11	-	5620700	5795264	TCONS_00032030	29	6598	XLOC_009271	FLT1	fms related receptor tyrosine kinase 1 [Source:VGNC Symbol;Acc:VGNC:88162]
ENSSSCG00000009320	Upregulated	148923	11	-	5620700	5795264	TCONS_00032031	29	6598	XLOC_009271	FLT1	fms related receptor tyrosine kinase 1 [Source:VGNC Symbol;Acc:VGNC:88162]
ENSSSCG00000009320	Upregulated	148924	11	-	5620700	5795264	TCONS_00032032	29	6571	XLOC_009271	FLT1	fms related receptor tyrosine kinase 1 [Source:VGNC Symbol;Acc:VGNC:88162]
ENSSSCG00000009320	Upregulated	148925	11	-	5620700	5795264	TCONS_00032033	29	6571	XLOC_009271	FLT1	fms related receptor tyrosine kinase 1 [Source:VGNC Symbol;Acc:VGNC:88162]
ENSSSCG00000009320	Upregulated	148926	11	-	5620700	5795264	TCONS_00032034	29	6571	XLOC_009271	FLT1	fms related receptor tyrosine kinase 1 [Source:VGNC Symbol;Acc:VGNC:88162]
ENSSSCG00000009320	Upregulated	148927	11	-	5620700	5795264	TCONS_00032035	29	6598	XLOC_009271	FLT1	fms related receptor tyrosine kinase 1 [Source:VGNC Symbol;Acc:VGNC:88162]
ENSSSCG00000009320	Upregulated	148928	11	-	5620705	5794912	TCONS_00032036	29	6214	XLOC_009271	FLT1	fms related receptor tyrosine kinase 1 [Source:VGNC Symbol;Acc:VGNC:88162]
ENSSSCG00000009320	Upregulated	148929	11	+	5620777	5632066	TCONS_00029370	7	2305	XLOC_008414	FLT1	fms related receptor tyrosine kinase 1 [Source:VGNC Symbol;Acc:VGNC:88162]
ENSSSCG00000009320	Upregulated	148930	11	+	5620799	5796418	TCONS_00029371	30	6385	XLOC_008414	FLT1	fms related receptor tyrosine kinase 1 [Source:VGNC Symbol;Acc:VGNC:88162]
ENSSSCG00000009320	Upregulated	148931	11	+	5622907	5794964	TCONS_00029372	30	4196	XLOC_008414	FLT1	fms related receptor tyrosine kinase 1 [Source:VGNC Symbol;Acc:VGNC:88162]
ENSSSCG00000009320	Upregulated	148932	11	+	5634637	5794964	TCONS_00029373	26	3440	XLOC_008414	FLT1	fms related receptor tyrosine kinase 1 [Source:VGNC Symbol;Acc:VGNC:88162]
ENSSSCG00000039723	Upregulated	237231	AEMK02000278.1	+	60817	144751	TCONS_00226585	11	2545	XLOC_061859	ENSSSCG00000039723
ENSSSCG00000039723	Upregulated	237232	AEMK02000278.1	+	60817	224269	TCONS_00226586	4	1069	XLOC_061859	ENSSSCG00000039723
ENSSSCG00000039723	Upregulated	237233	AEMK02000278.1	+	60817	224269	TCONS_00226587	13	2975	XLOC_061859	ENSSSCG00000039723
ENSSSCG00000039723	Upregulated	237234	AEMK02000278.1	+	60817	224269	TCONS_00226588	3	955	XLOC_061859	ENSSSCG00000039723
ENSSSCG00000039723	Upregulated	237235	AEMK02000278.1	+	60817	225554	TCONS_00226589	4	1219	XLOC_061859	ENSSSCG00000039723
ENSSSCG00000039723	Upregulated	237236	AEMK02000278.1	+	60817	225563	TCONS_00226590	14	3422	XLOC_061859	ENSSSCG00000039723
ENSSSCG00000039723	Upregulated	237237	AEMK02000278.1	+	60817	225563	TCONS_00226591	7	2722	XLOC_061859	ENSSSCG00000039723
ENSSSCG00000039723	Upregulated	237238	AEMK02000278.1	+	61126	225557	TCONS_00226592	4	1237	XLOC_061859	ENSSSCG00000039723
ENSSSCG00000039723	Upregulated	237243	AEMK02000278.1	+	61308	225557	TCONS_00226593	13	2961	XLOC_061859	ENSSSCG00000039723
ENSSSCG00000039723	Upregulated	237244	AEMK02000278.1	+	61392	224269	TCONS_00226594	11	1327	XLOC_061859	ENSSSCG00000039723
ENSSSCG00000039723	Upregulated	237248	AEMK02000278.1	+	130607	225563	TCONS_00226595	6	1203	XLOC_061859	ENSSSCG00000039723
ENSSSCG00000039723	Upregulated	237249	AEMK02000278.1	-	224407	225373	TCONS_00226603	2	534	XLOC_061860	ENSSSCG00000039723
ENSSSCG00000043301	Upregulated	15626	1	-	201334366	201367860	TCONS_00018855	3	867	XLOC_005188	IFN-ALPHA-8	interferon-alpha-8 [Source:NCBI gene (formerly Entrezgene);Acc:100153724]
ENSSSCG00000043301	Upregulated	15627	1	-	201334366	201367876	TCONS_00018856	3	847	XLOC_005188	IFN-ALPHA-8	interferon-alpha-8 [Source:NCBI gene (formerly Entrezgene);Acc:100153724]
ENSSSCG00000043301	Upregulated	15628	1	+	201334780	201367921	TCONS_00007680	4	516	XLOC_002183	IFN-ALPHA-8	interferon-alpha-8 [Source:NCBI gene (formerly Entrezgene);Acc:100153724]
ENSSSCG00000043301	Upregulated	15629	1	+	201341268	201367921	TCONS_00007681	2	372	XLOC_002183	IFN-ALPHA-8	interferon-alpha-8 [Source:NCBI gene (formerly Entrezgene);Acc:100153724]
ENSSSCG00000043301	Upregulated	15630	1	+	201341279	201367921	TCONS_00007682	4	488	XLOC_002183	IFN-ALPHA-8	interferon-alpha-8 [Source:NCBI gene (formerly Entrezgene);Acc:100153724]
ENSSSCG00000043301	Upregulated	15632	1	-	201347953	201392587	TCONS_00018858	3	5155	XLOC_005190	IFN-ALPHA-8	interferon-alpha-8 [Source:NCBI gene (formerly Entrezgene);Acc:100153724]
ENSSSCG00000043301	Upregulated	15633	1	-	201347953	201408266	TCONS_00018859	3	1117	XLOC_005190	IFN-ALPHA-8	interferon-alpha-8 [Source:NCBI gene (formerly Entrezgene);Acc:100153724]
ENSSSCG00000043301	Upregulated	15634	1	+	201356829	201367921	TCONS_00007683	3	497	XLOC_002183	IFN-ALPHA-8	interferon-alpha-8 [Source:NCBI gene (formerly Entrezgene);Acc:100153724]
ENSSSCG00000047456	Upregulated	197789	14	+	140675191	140679063	TCONS_00071352	2	2217	XLOC_019410	ENSSSCG00000047456
ENSSSCG00000047456	Upregulated	197790	14	-	140675569	140677618	TCONS_00078776	1	2050	XLOC_021245	ENSSSCG00000047456
ENSSSCG00000047456	Upregulated	197791	14	-	140677706	140678896	TCONS_00078777	1	1191	XLOC_021246	ENSSSCG00000047456
ENSSSCG00000045498	Upregulated	174906	13	+	96643347	96648515	TCONS_00051142	2	3007	XLOC_014094	ENSSSCG00000045498
ENSSSCG00000045498	Upregulated	174907	13	+	96643409	96648515	TCONS_00051143	2	2950	XLOC_014094	ENSSSCG00000045498
ENSSSCG00000045498	Upregulated	174908	13	-	96643694	96648822	TCONS_00059904	3	2362	XLOC_016390	ENSSSCG00000045498
ENSSSCG00000045498	Upregulated	174909	13	-	96643694	96649303	TCONS_00059905	2	3453	XLOC_016390	ENSSSCG00000045498
ENSSSCG00000001725	Upregulated	111753	7	-	41640258	41711791	TCONS_00200168	21	5465	XLOC_054071	ADGRF5	adhesion G protein-coupled receptor F5 [Source:HGNC Symbol;Acc:HGNC:19030]
ENSSSCG00000001725	Upregulated	111754	7	-	41640258	41728844	TCONS_00200169	21	5533	XLOC_054071	ADGRF5	adhesion G protein-coupled receptor F5 [Source:HGNC Symbol;Acc:HGNC:19030]
ENSSSCG00000001725	Upregulated	111755	7	-	41640258	41769286	TCONS_00200170	21	5798	XLOC_054071	ADGRF5	adhesion G protein-coupled receptor F5 [Source:HGNC Symbol;Acc:HGNC:19030]
ENSSSCG00000001725	Upregulated	111756	7	-	41640258	41769286	TCONS_00200171	21	5798	XLOC_054071	ADGRF5	adhesion G protein-coupled receptor F5 [Source:HGNC Symbol;Acc:HGNC:19030]
ENSSSCG00000001725	Upregulated	111757	7	-	41640258	41769286	TCONS_00200172	21	5798	XLOC_054071	ADGRF5	adhesion G protein-coupled receptor F5 [Source:HGNC Symbol;Acc:HGNC:19030]
ENSSSCG00000001725	Upregulated	111758	7	-	41640258	41769286	TCONS_00200173	21	5801	XLOC_054071	ADGRF5	adhesion G protein-coupled receptor F5 [Source:HGNC Symbol;Acc:HGNC:19030]
ENSSSCG00000001725	Upregulated	111759	7	-	41640258	41769286	TCONS_00200174	21	5798	XLOC_054071	ADGRF5	adhesion G protein-coupled receptor F5 [Source:HGNC Symbol;Acc:HGNC:19030]
ENSSSCG00000001725	Upregulated	111760	7	-	41642404	41663383	TCONS_00200175	11	2720	XLOC_054071	ADGRF5	adhesion G protein-coupled receptor F5 [Source:HGNC Symbol;Acc:HGNC:19030]
ENSSSCG00000001725	Upregulated	111761	7	+	41647040	41648834	TCONS_00193128	2	773	XLOC_052156	ADGRF5	adhesion G protein-coupled receptor F5 [Source:HGNC Symbol;Acc:HGNC:19030]
ENSSSCG00000001725	Upregulated	111762	7	+	41652511	41656502	TCONS_00193129	2	271	XLOC_052157	ADGRF5	adhesion G protein-coupled receptor F5 [Source:HGNC Symbol;Acc:HGNC:19030]
ENSSSCG00000008908	Upregulated	123436	8	+	54916469	54950069	TCONS_00206006	6	2241	XLOC_055746	PDCL2	phosducin like 2 [Source:VGNC Symbol;Acc:VGNC:91246]
ENSSSCG00000008908	Upregulated	123437	8	+	54916607	54949919	TCONS_00206007	4	6797	XLOC_055746	PDCL2	phosducin like 2 [Source:VGNC Symbol;Acc:VGNC:91246]
ENSSSCG00000008908	Upregulated	123438	8	+	54916636	54949919	TCONS_00206008	3	6677	XLOC_055746	PDCL2	phosducin like 2 [Source:VGNC Symbol;Acc:VGNC:91246]
ENSSSCG00000008908	Upregulated	123439	8	+	54916636	54949919	TCONS_00206009	5	4384	XLOC_055746	PDCL2	phosducin like 2 [Source:VGNC Symbol;Acc:VGNC:91246]
ENSSSCG00000008908	Upregulated	123440	8	+	54917668	54949919	TCONS_00206010	5	846	XLOC_055746	PDCL2	phosducin like 2 [Source:VGNC Symbol;Acc:VGNC:91246]
ENSSSCG00000008908	Upregulated	123441	8	-	54917689	54950086	TCONS_00210746	5	1068	XLOC_057110	PDCL2	phosducin like 2 [Source:VGNC Symbol;Acc:VGNC:91246]
ENSSSCG00000008908	Upregulated	123442	8	-	54917689	54950086	TCONS_00210747	4	859	XLOC_057110	PDCL2	phosducin like 2 [Source:VGNC Symbol;Acc:VGNC:91246]
ENSSSCG00000008908	Upregulated	123443	8	-	54917689	54950086	TCONS_00210748	5	950	XLOC_057110	PDCL2	phosducin like 2 [Source:VGNC Symbol;Acc:VGNC:91246]
ENSSSCG00000008908	Upregulated	123444	8	+	54917757	54949919	TCONS_00206011	4	3172	XLOC_055746	PDCL2	phosducin like 2 [Source:VGNC Symbol;Acc:VGNC:91246]
ENSSSCG00000008908	Upregulated	123445	8	+	54917757	54950069	TCONS_00206012	4	774	XLOC_055746	PDCL2	phosducin like 2 [Source:VGNC Symbol;Acc:VGNC:91246]
ENSSSCG00000008908	Upregulated	123446	8	-	54917953	54950086	TCONS_00210749	6	895	XLOC_057110	PDCL2	phosducin like 2 [Source:VGNC Symbol;Acc:VGNC:91246]
ENSSSCG00000008908	Upregulated	123447	8	+	54918014	54950069	TCONS_00206013	5	608	XLOC_055746	PDCL2	phosducin like 2 [Source:VGNC Symbol;Acc:VGNC:91246]
ENSSSCG00000008908	Upregulated	123448	8	+	54918014	54950069	TCONS_00206014	5	3080	XLOC_055746	PDCL2	phosducin like 2 [Source:VGNC Symbol;Acc:VGNC:91246]
ENSSSCG00000008844	Upregulated	122765	8	-	41809116	41852816	TCONS_00210399	30	5679	XLOC_056998	KDR	kinase insert domain receptor [Source:VGNC Symbol;Acc:VGNC:89418]
ENSSSCG00000008844	Upregulated	122766	8	-	41809116	41852816	TCONS_00210400	30	5679	XLOC_056998	KDR	kinase insert domain receptor [Source:VGNC Symbol;Acc:VGNC:89418]
ENSSSCG00000008844	Upregulated	122767	8	-	41809116	41852816	TCONS_00210401	30	5679	XLOC_056998	KDR	kinase insert domain receptor [Source:VGNC Symbol;Acc:VGNC:89418]
ENSSSCG00000008844	Upregulated	122768	8	-	41809116	41852816	TCONS_00210402	29	5574	XLOC_056998	KDR	kinase insert domain receptor [Source:VGNC Symbol;Acc:VGNC:89418]
ENSSSCG00000008844	Upregulated	122769	8	-	41809116	41852816	TCONS_00210403	29	5574	XLOC_056998	KDR	kinase insert domain receptor [Source:VGNC Symbol;Acc:VGNC:89418]
ENSSSCG00000008844	Upregulated	122770	8	-	41809116	41852816	TCONS_00210404	29	5574	XLOC_056998	KDR	kinase insert domain receptor [Source:VGNC Symbol;Acc:VGNC:89418]
ENSSSCG00000008844	Upregulated	122771	8	-	41809116	41852816	TCONS_00210405	30	5679	XLOC_056998	KDR	kinase insert domain receptor [Source:VGNC Symbol;Acc:VGNC:89418]
ENSSSCG00000008844	Upregulated	122772	8	-	41809116	41852816	TCONS_00210406	30	5679	XLOC_056998	KDR	kinase insert domain receptor [Source:VGNC Symbol;Acc:VGNC:89418]
ENSSSCG00000008844	Upregulated	122773	8	-	41809116	41852816	TCONS_00210407	30	5679	XLOC_056998	KDR	kinase insert domain receptor [Source:VGNC Symbol;Acc:VGNC:89418]
ENSSSCG00000008844	Upregulated	122774	8	-	41809116	41852816	TCONS_00210408	30	5691	XLOC_056998	KDR	kinase insert domain receptor [Source:VGNC Symbol;Acc:VGNC:89418]
ENSSSCG00000008844	Upregulated	122775	8	-	41809116	41852816	TCONS_00210409	30	5691	XLOC_056998	KDR	kinase insert domain receptor [Source:VGNC Symbol;Acc:VGNC:89418]
ENSSSCG00000008844	Upregulated	122776	8	-	41809116	41852816	TCONS_00210410	30	5691	XLOC_056998	KDR	kinase insert domain receptor [Source:VGNC Symbol;Acc:VGNC:89418]
ENSSSCG00000008844	Upregulated	122777	8	-	41809116	41852816	TCONS_00210411	30	5679	XLOC_056998	KDR	kinase insert domain receptor [Source:VGNC Symbol;Acc:VGNC:89418]
ENSSSCG00000008844	Upregulated	122778	8	-	41809116	41852816	TCONS_00210412	29	5586	XLOC_056998	KDR	kinase insert domain receptor [Source:VGNC Symbol;Acc:VGNC:89418]
ENSSSCG00000008844	Upregulated	122779	8	-	41809116	41852816	TCONS_00210413	29	5580	XLOC_056998	KDR	kinase insert domain receptor [Source:VGNC Symbol;Acc:VGNC:89418]
ENSSSCG00000008844	Upregulated	122780	8	-	41809116	41852816	TCONS_00210414	30	5691	XLOC_056998	KDR	kinase insert domain receptor [Source:VGNC Symbol;Acc:VGNC:89418]
ENSSSCG00000008844	Upregulated	122781	8	-	41809116	41852816	TCONS_00210415	30	5691	XLOC_056998	KDR	kinase insert domain receptor [Source:VGNC Symbol;Acc:VGNC:89418]
ENSSSCG00000008844	Upregulated	122782	8	-	41809116	41852816	TCONS_00210416	30	5691	XLOC_056998	KDR	kinase insert domain receptor [Source:VGNC Symbol;Acc:VGNC:89418]
ENSSSCG00000008844	Upregulated	122783	8	-	41809116	41852816	TCONS_00210417	30	5679	XLOC_056998	KDR	kinase insert domain receptor [Source:VGNC Symbol;Acc:VGNC:89418]
ENSSSCG00000008844	Upregulated	122784	8	-	41809116	41852816	TCONS_00210418	30	5679	XLOC_056998	KDR	kinase insert domain receptor [Source:VGNC Symbol;Acc:VGNC:89418]
ENSSSCG00000008844	Upregulated	122785	8	-	41809116	41856339	TCONS_00210419	30	6034	XLOC_056998	KDR	kinase insert domain receptor [Source:VGNC Symbol;Acc:VGNC:89418]
ENSSSCG00000008844	Upregulated	122786	8	-	41809116	41856339	TCONS_00210420	30	6022	XLOC_056998	KDR	kinase insert domain receptor [Source:VGNC Symbol;Acc:VGNC:89418]
ENSSSCG00000008844	Upregulated	122787	8	-	41809116	41856339	TCONS_00210421	30	6022	XLOC_056998	KDR	kinase insert domain receptor [Source:VGNC Symbol;Acc:VGNC:89418]
ENSSSCG00000008844	Upregulated	122788	8	-	41809116	41856339	TCONS_00210422	30	6022	XLOC_056998	KDR	kinase insert domain receptor [Source:VGNC Symbol;Acc:VGNC:89418]
ENSSSCG00000008844	Upregulated	122789	8	-	41809116	41856339	TCONS_00210423	30	6034	XLOC_056998	KDR	kinase insert domain receptor [Source:VGNC Symbol;Acc:VGNC:89418]
ENSSSCG00000008844	Upregulated	122790	8	-	41809116	41856339	TCONS_00210424	29	5929	XLOC_056998	KDR	kinase insert domain receptor [Source:VGNC Symbol;Acc:VGNC:89418]
ENSSSCG00000008844	Upregulated	122791	8	-	41809116	41856339	TCONS_00210425	29	5917	XLOC_056998	KDR	kinase insert domain receptor [Source:VGNC Symbol;Acc:VGNC:89418]
ENSSSCG00000008844	Upregulated	122792	8	-	41809116	41856339	TCONS_00210426	30	6022	XLOC_056998	KDR	kinase insert domain receptor [Source:VGNC Symbol;Acc:VGNC:89418]
ENSSSCG00000008844	Upregulated	122793	8	-	41809116	41856339	TCONS_00210427	30	6022	XLOC_056998	KDR	kinase insert domain receptor [Source:VGNC Symbol;Acc:VGNC:89418]
ENSSSCG00000008844	Upregulated	122794	8	-	41809116	41856339	TCONS_00210428	30	6022	XLOC_056998	KDR	kinase insert domain receptor [Source:VGNC Symbol;Acc:VGNC:89418]
ENSSSCG00000008844	Upregulated	122795	8	-	41809122	41856339	TCONS_00210429	30	6028	XLOC_056998	KDR	kinase insert domain receptor [Source:VGNC Symbol;Acc:VGNC:89418]
ENSSSCG00000008844	Upregulated	122796	8	-	41809127	41856331	TCONS_00210430	29	5898	XLOC_056998	KDR	kinase insert domain receptor [Source:VGNC Symbol;Acc:VGNC:89418]
ENSSSCG00000008844	Upregulated	122797	8	+	41809309	41842484	TCONS_00205682	22	4327	XLOC_055618	KDR	kinase insert domain receptor [Source:VGNC Symbol;Acc:VGNC:89418]
ENSSSCG00000008844	Upregulated	122798	8	+	41809438	41842484	TCONS_00205683	22	4210	XLOC_055618	KDR	kinase insert domain receptor [Source:VGNC Symbol;Acc:VGNC:89418]
ENSSSCG00000008844	Upregulated	122799	8	-	41818598	41852816	TCONS_00210431	28	3644	XLOC_056998	KDR	kinase insert domain receptor [Source:VGNC Symbol;Acc:VGNC:89418]
ENSSSCG00000002129	Upregulated	115854	7	-	77780932	77864109	TCONS_00202206	33	6170	XLOC_054614	RPGRIP1	RPGR interacting protein 1 [Source:VGNC Symbol;Acc:VGNC:92423]
ENSSSCG00000002129	Upregulated	115858	7	-	77814708	77864194	TCONS_00202207	9	1343	XLOC_054614	RPGRIP1	RPGR interacting protein 1 [Source:VGNC Symbol;Acc:VGNC:92423]
ENSSSCG00000002129	Upregulated	115859	7	-	77814708	77871364	TCONS_00202208	13	1886	XLOC_054614	RPGRIP1	RPGR interacting protein 1 [Source:VGNC Symbol;Acc:VGNC:92423]
ENSSSCG00000002129	Upregulated	115860	7	-	77814708	77871364	TCONS_00202209	13	1934	XLOC_054614	RPGRIP1	RPGR interacting protein 1 [Source:VGNC Symbol;Acc:VGNC:92423]
ENSSSCG00000002129	Upregulated	115861	7	-	77814708	77871364	TCONS_00202210	13	1883	XLOC_054614	RPGRIP1	RPGR interacting protein 1 [Source:VGNC Symbol;Acc:VGNC:92423]
ENSSSCG00000002129	Upregulated	115862	7	-	77814708	77871364	TCONS_00202211	13	1886	XLOC_054614	RPGRIP1	RPGR interacting protein 1 [Source:VGNC Symbol;Acc:VGNC:92423]
ENSSSCG00000002129	Upregulated	115863	7	-	77814708	77903928	TCONS_00202212	21	2938	XLOC_054614	RPGRIP1	RPGR interacting protein 1 [Source:VGNC Symbol;Acc:VGNC:92423]
ENSSSCG00000002129	Upregulated	115864	7	-	77814708	77903928	TCONS_00202213	21	2890	XLOC_054614	RPGRIP1	RPGR interacting protein 1 [Source:VGNC Symbol;Acc:VGNC:92423]
ENSSSCG00000002129	Upregulated	115865	7	-	77864780	77871364	TCONS_00202214	7	1019	XLOC_054614	RPGRIP1	RPGR interacting protein 1 [Source:VGNC Symbol;Acc:VGNC:92423]
ENSSSCG00000039673	Upregulated	157378	12	-	19033480	19036820	TCONS_00042455	4	2317	XLOC_011921	ASB16	ankyrin repeat and SOCS box containing 16 [Source:VGNC Symbol;Acc:VGNC:98974]
ENSSSCG00000039673	Upregulated	157379	12	-	19033480	19040434	TCONS_00042456	5	3147	XLOC_011921	ASB16	ankyrin repeat and SOCS box containing 16 [Source:VGNC Symbol;Acc:VGNC:98974]
ENSSSCG00000004301	Upregulated	4248	1	+	55753908	55791891	TCONS_00002049	7	8344	XLOC_000637	C6orf163	chromosome 1 C6orf163 homolog [Source:VGNC Symbol;Acc:VGNC:85968]
ENSSSCG00000004301	Upregulated	4254	1	+	55765774	55791891	TCONS_00002054	5	4600	XLOC_000637	C6orf163	chromosome 1 C6orf163 homolog [Source:VGNC Symbol;Acc:VGNC:85968]
ENSSSCG00000051631	Upregulated	29424	2	+	52257611	52258711	TCONS_00110331	1	1101	XLOC_030310	ENSSSCG00000051631
ENSSSCG00000023909	Upregulated	176399	13	-	122260216	122267861	TCONS_00060673	7	2772	XLOC_016603	THPO	thrombopoietin [Source:VGNC Symbol;Acc:VGNC:93962]
ENSSSCG00000023909	Upregulated	176400	13	-	122260216	122267861	TCONS_00060674	2	1511	XLOC_016603	THPO	thrombopoietin [Source:VGNC Symbol;Acc:VGNC:93962]
ENSSSCG00000023909	Upregulated	176401	13	-	122260216	122267861	TCONS_00060675	6	2888	XLOC_016603	THPO	thrombopoietin [Source:VGNC Symbol;Acc:VGNC:93962]
ENSSSCG00000023909	Upregulated	176402	13	-	122260551	122267861	TCONS_00060676	7	2449	XLOC_016603	THPO	thrombopoietin [Source:VGNC Symbol;Acc:VGNC:93962]
ENSSSCG00000023909	Upregulated	176405	13	-	122265687	122268064	TCONS_00060677	2	1344	XLOC_016603	THPO	thrombopoietin [Source:VGNC Symbol;Acc:VGNC:93962]
ENSSSCG00000038460	Upregulated	84584	6	-	2592993	2597336	TCONS_00179499	2	2980	XLOC_048580	FOXF1	forkhead box F1 [Source:VGNC Symbol;Acc:VGNC:88204]
ENSSSCG00000038460	Upregulated	84585	6	-	2592993	2597659	TCONS_00179500	3	2678	XLOC_048580	FOXF1	forkhead box F1 [Source:VGNC Symbol;Acc:VGNC:88204]
ENSSSCG00000038460	Upregulated	84586	6	+	2593011	2595927	TCONS_00168768	2	1553	XLOC_045840	FOXF1	forkhead box F1 [Source:VGNC Symbol;Acc:VGNC:88204]
ENSSSCG00000048349	Upregulated	73541	5	-	8969286	8976270	TCONS_00163242	2	4223	XLOC_044278	ENSSSCG00000048349
ENSSSCG00000048349	Upregulated	73542	5	-	8969286	8982115	TCONS_00163243	3	10019	XLOC_044278	ENSSSCG00000048349
ENSSSCG00000048349	Upregulated	73543	5	-	8975661	8981848	TCONS_00163244	2	6139	XLOC_044278	ENSSSCG00000048349
ENSSSCG00000048349	Upregulated	73544	5	+	8979884	8980630	TCONS_00157221	1	747	XLOC_042655	ENSSSCG00000048349
ENSSSCG00000048349	Upregulated	73545	5	+	8981026	8981453	TCONS_00157222	1	428	XLOC_042656	ENSSSCG00000048349
ENSSSCG00000051272	Upregulated	103013	6	+	150743845	150756106	TCONS_00177874	3	2715	XLOC_048136	ENSSSCG00000051272
ENSSSCG00000051272	Upregulated	103014	6	+	150743845	150756106	TCONS_00177875	2	4976	XLOC_048136	ENSSSCG00000051272
ENSSSCG00000051272	Upregulated	103015	6	-	150751567	150754029	TCONS_00188792	2	202	XLOC_050895	ENSSSCG00000051272
ENSSSCG00000051272	Upregulated	103016	6	-	150755182	150755332	TCONS_00188793	1	151	XLOC_050896	ENSSSCG00000051272
ENSSSCG00000024268	Upregulated	168325	13	+	29640568	29648007	TCONS_00047937	2	627	XLOC_013331	ENSSSCG00000024268
ENSSSCG00000024268	Upregulated	168326	13	-	29640741	29667227	TCONS_00056540	5	1039	XLOC_015656	ENSSSCG00000024268
ENSSSCG00000027954	Upregulated	123449	8	-	54952339	54963939	TCONS_00210750	8	658	XLOC_057111	NMU	neuromedin U [Source:VGNC Symbol;Acc:VGNC:90803]
ENSSSCG00000027954	Upregulated	123450	8	-	54952339	54963944	TCONS_00210751	8	663	XLOC_057111	NMU	neuromedin U [Source:VGNC Symbol;Acc:VGNC:90803]
ENSSSCG00000027954	Upregulated	123451	8	-	54952339	54963984	TCONS_00210752	7	628	XLOC_057111	NMU	neuromedin U [Source:VGNC Symbol;Acc:VGNC:90803]
ENSSSCG00000027954	Upregulated	123452	8	-	54952339	54964176	TCONS_00210753	8	895	XLOC_057111	NMU	neuromedin U [Source:VGNC Symbol;Acc:VGNC:90803]
ENSSSCG00000027954	Upregulated	123453	8	-	54952339	54978551	TCONS_00210754	9	766	XLOC_057111	NMU	neuromedin U [Source:VGNC Symbol;Acc:VGNC:90803]
ENSSSCG00000027954	Upregulated	123454	8	-	54952339	54978574	TCONS_00210755	11	923	XLOC_057111	NMU	neuromedin U [Source:VGNC Symbol;Acc:VGNC:90803]
ENSSSCG00000027954	Upregulated	123455	8	-	54952505	54978574	TCONS_00210756	10	698	XLOC_057111	NMU	neuromedin U [Source:VGNC Symbol;Acc:VGNC:90803]
ENSSSCG00000027954	Upregulated	123456	8	-	54952505	54978574	TCONS_00210757	8	617	XLOC_057111	NMU	neuromedin U [Source:VGNC Symbol;Acc:VGNC:90803]
ENSSSCG00000027954	Upregulated	123457	8	-	54952505	54978574	TCONS_00210758	9	650	XLOC_057111	NMU	neuromedin U [Source:VGNC Symbol;Acc:VGNC:90803]
ENSSSCG00000027954	Upregulated	123458	8	+	54952527	54964203	TCONS_00206015	8	734	XLOC_055747	NMU	neuromedin U [Source:VGNC Symbol;Acc:VGNC:90803]
ENSSSCG00000027954	Upregulated	123459	8	+	54952541	54964203	TCONS_00206016	7	645	XLOC_055747	NMU	neuromedin U [Source:VGNC Symbol;Acc:VGNC:90803]
ENSSSCG00000027954	Upregulated	123460	8	+	54953971	54964203	TCONS_00206017	8	988	XLOC_055747	NMU	neuromedin U [Source:VGNC Symbol;Acc:VGNC:90803]
ENSSSCG00000027954	Upregulated	123461	8	+	54958530	54964203	TCONS_00206018	7	654	XLOC_055747	NMU	neuromedin U [Source:VGNC Symbol;Acc:VGNC:90803]
ENSSSCG00000025270	Upregulated	176398	13	+	122259892	122277513	TCONS_00051853	25	6982	XLOC_014311	CHRD	chordin [Source:VGNC Symbol;Acc:VGNC:86661]
ENSSSCG00000025270	Upregulated	176403	13	+	122264242	122277513	TCONS_00051854	25	5563	XLOC_014311	CHRD	chordin [Source:VGNC Symbol;Acc:VGNC:86661]
ENSSSCG00000025270	Upregulated	176404	13	+	122264779	122277513	TCONS_00051855	25	5624	XLOC_014311	CHRD	chordin [Source:VGNC Symbol;Acc:VGNC:86661]
ENSSSCG00000025270	Upregulated	176406	13	+	122266496	122277513	TCONS_00051856	25	4794	XLOC_014311	CHRD	chordin [Source:VGNC Symbol;Acc:VGNC:86661]
ENSSSCG00000025270	Upregulated	176407	13	+	122266615	122277493	TCONS_00051857	24	4733	XLOC_014311	CHRD	chordin [Source:VGNC Symbol;Acc:VGNC:86661]
ENSSSCG00000025270	Upregulated	176408	13	+	122266631	122277509	TCONS_00051858	23	5371	XLOC_014311	CHRD	chordin [Source:VGNC Symbol;Acc:VGNC:86661]
ENSSSCG00000025270	Upregulated	176409	13	+	122273536	122277513	TCONS_00051859	10	1476	XLOC_014311	CHRD	chordin [Source:VGNC Symbol;Acc:VGNC:86661]
ENSSSCG00000025270	Upregulated	176410	13	-	122275287	122277458	TCONS_00060678	5	796	XLOC_016604	CHRD	chordin [Source:VGNC Symbol;Acc:VGNC:86661]
ENSSSCG00000014982	Upregulated	132217	9	-	33214594	33225080	TCONS_00221316	6	1247	XLOC_060197	MMP7	matrix metallopeptidase 7 [Source:VGNC Symbol;Acc:VGNC:90279]
ENSSSCG00000014982	Upregulated	132218	9	-	33214594	33225080	TCONS_00221317	6	1247	XLOC_060197	MMP7	matrix metallopeptidase 7 [Source:VGNC Symbol;Acc:VGNC:90279]
ENSSSCG00000014982	Upregulated	132219	9	-	33214594	33225080	TCONS_00221318	6	1247	XLOC_060197	MMP7	matrix metallopeptidase 7 [Source:VGNC Symbol;Acc:VGNC:90279]
ENSSSCG00000014982	Upregulated	132220	9	-	33214594	33225080	TCONS_00221319	6	1247	XLOC_060197	MMP7	matrix metallopeptidase 7 [Source:VGNC Symbol;Acc:VGNC:90279]
ENSSSCG00000014982	Upregulated	132221	9	-	33214594	33225080	TCONS_00221320	6	1247	XLOC_060197	MMP7	matrix metallopeptidase 7 [Source:VGNC Symbol;Acc:VGNC:90279]
ENSSSCG00000014982	Upregulated	132222	9	+	33214606	33224962	TCONS_00215154	6	1117	XLOC_058456	MMP7	matrix metallopeptidase 7 [Source:VGNC Symbol;Acc:VGNC:90279]
ENSSSCG00000014982	Upregulated	132223	9	+	33214657	33224962	TCONS_00215155	6	1066	XLOC_058456	MMP7	matrix metallopeptidase 7 [Source:VGNC Symbol;Acc:VGNC:90279]
ENSSSCG00000014982	Upregulated	132224	9	+	33214702	33224962	TCONS_00215156	4	645	XLOC_058456	MMP7	matrix metallopeptidase 7 [Source:VGNC Symbol;Acc:VGNC:90279]
ENSSSCG00000014982	Upregulated	132225	9	-	33217406	33225080	TCONS_00221321	6	951	XLOC_060197	MMP7	matrix metallopeptidase 7 [Source:VGNC Symbol;Acc:VGNC:90279]
ENSSSCG00000014982	Upregulated	132226	9	-	33217406	33250043	TCONS_00221322	6	736	XLOC_060197	MMP7	matrix metallopeptidase 7 [Source:VGNC Symbol;Acc:VGNC:90279]
ENSSSCG00000012773	Upregulated	233349	X	-	124425867	124429262	TCONS_00238402	12	1488	XLOC_065997	PNCK	pregnancy up-regulated nonubiquitous CaM kinase [Source:VGNC Symbol;Acc:VGNC:91593]
ENSSSCG00000012773	Upregulated	233350	X	-	124425867	124429262	TCONS_00238403	12	1489	XLOC_065997	PNCK	pregnancy up-regulated nonubiquitous CaM kinase [Source:VGNC Symbol;Acc:VGNC:91593]
ENSSSCG00000012773	Upregulated	233351	X	-	124425867	124429433	TCONS_00238404	12	1404	XLOC_065997	PNCK	pregnancy up-regulated nonubiquitous CaM kinase [Source:VGNC Symbol;Acc:VGNC:91593]
ENSSSCG00000012773	Upregulated	233352	X	-	124425867	124429769	TCONS_00238405	12	1405	XLOC_065997	PNCK	pregnancy up-regulated nonubiquitous CaM kinase [Source:VGNC Symbol;Acc:VGNC:91593]
ENSSSCG00000012773	Upregulated	233353	X	-	124425867	124429982	TCONS_00238406	12	1404	XLOC_065997	PNCK	pregnancy up-regulated nonubiquitous CaM kinase [Source:VGNC Symbol;Acc:VGNC:91593]
ENSSSCG00000012773	Upregulated	233354	X	-	124425870	124429433	TCONS_00238407	12	1397	XLOC_065997	PNCK	pregnancy up-regulated nonubiquitous CaM kinase [Source:VGNC Symbol;Acc:VGNC:91593]
ENSSSCG00000012773	Upregulated	233355	X	-	124425871	124429255	TCONS_00238408	11	1624	XLOC_065997	PNCK	pregnancy up-regulated nonubiquitous CaM kinase [Source:VGNC Symbol;Acc:VGNC:91593]
ENSSSCG00000012773	Upregulated	233356	X	+	124426130	124430011	TCONS_00234376	12	1139	XLOC_064824	PNCK	pregnancy up-regulated nonubiquitous CaM kinase [Source:VGNC Symbol;Acc:VGNC:91593]
ENSSSCG00000012773	Upregulated	233357	X	+	124426578	124428618	TCONS_00234377	10	878	XLOC_064824	PNCK	pregnancy up-regulated nonubiquitous CaM kinase [Source:VGNC Symbol;Acc:VGNC:91593]
ENSSSCG00000013173	Upregulated	26088	2	-	13125004	13127841	TCONS_00118383	1	2838	XLOC_032349	ENSSSCG00000013173
ENSSSCG00000013173	Upregulated	26089	2	+	13125852	13130382	TCONS_00108653	2	4503	XLOC_029844	ENSSSCG00000013173
ENSSSCG00000013173	Upregulated	26090	2	+	13126088	13130382	TCONS_00108654	1	4295	XLOC_029844	ENSSSCG00000013173
ENSSSCG00000013173	Upregulated	26091	2	-	13128987	13130129	TCONS_00118384	1	1143	XLOC_032350	ENSSSCG00000013173
ENSSSCG00000045673	Upregulated	168265	13	+	29471647	29477670	TCONS_00047894	3	2376	XLOC_013328	ENSSSCG00000045673
ENSSSCG00000045673	Upregulated	168266	13	+	29471662	29477670	TCONS_00047895	4	2012	XLOC_013328	ENSSSCG00000045673
ENSSSCG00000045673	Upregulated	168267	13	+	29472901	29476277	TCONS_00047896	3	1081	XLOC_013328	ENSSSCG00000045673
ENSSSCG00000045673	Upregulated	168268	13	+	29472901	29476288	TCONS_00047897	2	1947	XLOC_013328	ENSSSCG00000045673
ENSSSCG00000024610	Upregulated	75435	5	-	18090751	18099045	TCONS_00164182	10	2813	XLOC_044547	KRT4	keratin 4 [Source:VGNC Symbol;Acc:VGNC:89591]
ENSSSCG00000024610	Upregulated	75436	5	-	18090751	18099045	TCONS_00164183	12	2891	XLOC_044547	KRT4	keratin 4 [Source:VGNC Symbol;Acc:VGNC:89591]
ENSSSCG00000024610	Upregulated	75437	5	-	18090751	18099045	TCONS_00164184	10	2957	XLOC_044547	KRT4	keratin 4 [Source:VGNC Symbol;Acc:VGNC:89591]
ENSSSCG00000024610	Upregulated	75438	5	-	18091737	18098980	TCONS_00164185	10	2066	XLOC_044547	KRT4	keratin 4 [Source:VGNC Symbol;Acc:VGNC:89591]
ENSSSCG00000024610	Upregulated	75439	5	-	18091737	18099045	TCONS_00164186	10	2119	XLOC_044547	KRT4	keratin 4 [Source:VGNC Symbol;Acc:VGNC:89591]
ENSSSCG00000024610	Upregulated	75440	5	+	18091790	18093969	TCONS_00158167	5	1020	XLOC_042894	KRT4	keratin 4 [Source:VGNC Symbol;Acc:VGNC:89591]
ENSSSCG00000024610	Upregulated	75441	5	-	18092041	18098980	TCONS_00164187	9	1485	XLOC_044547	KRT4	keratin 4 [Source:VGNC Symbol;Acc:VGNC:89591]
ENSSSCG00000050584	Upregulated	171051	13	-	46220925	46247500	TCONS_00057984	3	2731	XLOC_015874	ENSSSCG00000050584
ENSSSCG00000004399	Upregulated	5507	1	-	76423352	76467576	TCONS_00013750	8	2042	XLOC_003906	SLC22A16	solute carrier family 22 member 16 [Source:VGNC Symbol;Acc:VGNC:92976]
ENSSSCG00000004399	Upregulated	5508	1	-	76423352	76467576	TCONS_00013751	8	2042	XLOC_003906	SLC22A16	solute carrier family 22 member 16 [Source:VGNC Symbol;Acc:VGNC:92976]
ENSSSCG00000004399	Upregulated	5509	1	+	76436797	76450664	TCONS_00002699	4	1079	XLOC_000830	SLC22A16	solute carrier family 22 member 16 [Source:VGNC Symbol;Acc:VGNC:92976]
ENSSSCG00000001826	Upregulated	113070	7	+	53909425	53930935	TCONS_00193812	14	1590	XLOC_052342	CFAP100	cilia and flagella associated protein 100 [Source:VGNC Symbol;Acc:VGNC:86593]
ENSSSCG00000001826	Upregulated	113071	7	+	53909425	53949630	TCONS_00193813	17	2115	XLOC_052342	CFAP100	cilia and flagella associated protein 100 [Source:VGNC Symbol;Acc:VGNC:86593]
ENSSSCG00000001826	Upregulated	113072	7	+	53909425	53949630	TCONS_00193814	16	2190	XLOC_052342	CFAP100	cilia and flagella associated protein 100 [Source:VGNC Symbol;Acc:VGNC:86593]
ENSSSCG00000001826	Upregulated	113073	7	-	53909438	53933033	TCONS_00200800	12	5871	XLOC_054247	CFAP100	cilia and flagella associated protein 100 [Source:VGNC Symbol;Acc:VGNC:86593]
ENSSSCG00000001826	Upregulated	113074	7	-	53909438	53948065	TCONS_00200801	13	4063	XLOC_054247	CFAP100	cilia and flagella associated protein 100 [Source:VGNC Symbol;Acc:VGNC:86593]
ENSSSCG00000001826	Upregulated	113075	7	-	53909438	53949480	TCONS_00200802	15	1776	XLOC_054247	CFAP100	cilia and flagella associated protein 100 [Source:VGNC Symbol;Acc:VGNC:86593]
ENSSSCG00000001826	Upregulated	113076	7	-	53909438	53949480	TCONS_00200803	14	4220	XLOC_054247	CFAP100	cilia and flagella associated protein 100 [Source:VGNC Symbol;Acc:VGNC:86593]
ENSSSCG00000001826	Upregulated	113077	7	+	53909925	53949630	TCONS_00193815	17	2118	XLOC_052342	CFAP100	cilia and flagella associated protein 100 [Source:VGNC Symbol;Acc:VGNC:86593]
ENSSSCG00000001826	Upregulated	113078	7	-	53925830	53933105	TCONS_00200804	6	3423	XLOC_054247	CFAP100	cilia and flagella associated protein 100 [Source:VGNC Symbol;Acc:VGNC:86593]
ENSSSCG00000001826	Upregulated	113079	7	-	53925830	53933105	TCONS_00200805	5	5544	XLOC_054247	CFAP100	cilia and flagella associated protein 100 [Source:VGNC Symbol;Acc:VGNC:86593]
ENSSSCG00000001826	Upregulated	113080	7	-	53925830	53949480	TCONS_00200806	9	1628	XLOC_054247	CFAP100	cilia and flagella associated protein 100 [Source:VGNC Symbol;Acc:VGNC:86593]
ENSSSCG00000001826	Upregulated	113081	7	-	53925830	53949480	TCONS_00200807	8	1579	XLOC_054247	CFAP100	cilia and flagella associated protein 100 [Source:VGNC Symbol;Acc:VGNC:86593]
ENSSSCG00000002373	Upregulated	117837	7	-	98065323	98074822	TCONS_00203268	4	1999	XLOC_054924	PROX2	prospero homeobox 2 [Source:VGNC Symbol;Acc:VGNC:91838]
ENSSSCG00000028997	Upregulated	224561	18	+	45408377	45411510	TCONS_00103436	3	1883	XLOC_028432	ENSSSCG00000028997
ENSSSCG00000028997	Upregulated	224562	18	+	45408377	45411510	TCONS_00103437	2	2056	XLOC_028432	ENSSSCG00000028997
ENSSSCG00000028997	Upregulated	224563	18	+	45408432	45410566	TCONS_00103438	3	884	XLOC_028432	ENSSSCG00000028997
ENSSSCG00000028997	Upregulated	224564	18	+	45409402	45411510	TCONS_00103439	2	1500	XLOC_028432	ENSSSCG00000028997
ENSSSCG00000028997	Upregulated	224565	18	-	45410853	45411441	TCONS_00106136	1	589	XLOC_029195	ENSSSCG00000028997
ENSSSCG00000046920	Upregulated	37062	2	-	94345407	94549013	TCONS_00123969	2	228	XLOC_033751	ENSSSCG00000046920
ENSSSCG00000046920	Upregulated	37067	2	-	94449910	94464565	TCONS_00123971	2	2336	XLOC_033753	ENSSSCG00000046920
ENSSSCG00000046920	Upregulated	37068	2	-	94449992	94452163	TCONS_00123972	1	2172	XLOC_033753	ENSSSCG00000046920
ENSSSCG00000046920	Upregulated	37069	2	+	94451639	94464630	TCONS_00114025	2	672	XLOC_031171	ENSSSCG00000046920
ENSSSCG00000033382	Upregulated	22682	2	+	661564	1088862	TCONS_00106996	3	111	XLOC_029442	ENSSSCG00000033382	mucin 5AC, oligomeric mucus/gel-forming [Source:VGNC Symbol;Acc:VGNC:90483]
ENSSSCG00000033382	Upregulated	22689	2	+	760215	790317	TCONS_00107003	55	10333	XLOC_029444	ENSSSCG00000033382	mucin 5AC, oligomeric mucus/gel-forming [Source:VGNC Symbol;Acc:VGNC:90483]
ENSSSCG00000033382	Upregulated	22691	2	+	785811	790317	TCONS_00107005	11	1708	XLOC_029444	ENSSSCG00000033382	mucin 5AC, oligomeric mucus/gel-forming [Source:VGNC Symbol;Acc:VGNC:90483]
ENSSSCG00000046418	Upregulated	77772	5	+	34354275	34402325	TCONS_00159319	2	343	XLOC_043217	ENSSSCG00000046418
ENSSSCG00000046418	Upregulated	77778	5	-	34376752	34378411	TCONS_00165369	1	1660	XLOC_044876	ENSSSCG00000046418
ENSSSCG00000046418	Upregulated	77779	5	+	34377307	34379705	TCONS_00159320	2	1856	XLOC_043218	ENSSSCG00000046418
ENSSSCG00000046418	Upregulated	77780	5	-	34378519	34378997	TCONS_00165370	1	479	XLOC_044877	ENSSSCG00000046418
ENSSSCG00000046418	Upregulated	77781	5	-	34379294	34379934	TCONS_00165371	1	641	XLOC_044878	ENSSSCG00000046418
ENSSSCG00000015862	Upregulated	201213	15	+	59672538	59709378	TCONS_00080449	10	2040	XLOC_021773	LIMS2	LIM zinc finger domain containing 2 [Source:VGNC Symbol;Acc:VGNC:95731]
ENSSSCG00000015862	Upregulated	201214	15	+	59672538	59709380	TCONS_00080450	13	2393	XLOC_021773	LIMS2	LIM zinc finger domain containing 2 [Source:VGNC Symbol;Acc:VGNC:95731]
ENSSSCG00000015862	Upregulated	201215	15	+	59672836	59708766	TCONS_00080451	13	1481	XLOC_021773	LIMS2	LIM zinc finger domain containing 2 [Source:VGNC Symbol;Acc:VGNC:95731]
ENSSSCG00000015862	Upregulated	201216	15	+	59672836	59709380	TCONS_00080452	12	2032	XLOC_021773	LIMS2	LIM zinc finger domain containing 2 [Source:VGNC Symbol;Acc:VGNC:95731]
ENSSSCG00000015862	Upregulated	201220	15	+	59672940	59709380	TCONS_00080453	11	1676	XLOC_021773	LIMS2	LIM zinc finger domain containing 2 [Source:VGNC Symbol;Acc:VGNC:95731]
ENSSSCG00000015862	Upregulated	201221	15	+	59686065	59709380	TCONS_00080454	11	3102	XLOC_021773	LIMS2	LIM zinc finger domain containing 2 [Source:VGNC Symbol;Acc:VGNC:95731]
ENSSSCG00000015862	Upregulated	201222	15	+	59686065	59709380	TCONS_00080455	10	3158	XLOC_021773	LIMS2	LIM zinc finger domain containing 2 [Source:VGNC Symbol;Acc:VGNC:95731]
ENSSSCG00000015862	Upregulated	201223	15	+	59691758	59709380	TCONS_00080456	10	1646	XLOC_021773	LIMS2	LIM zinc finger domain containing 2 [Source:VGNC Symbol;Acc:VGNC:95731]
ENSSSCG00000041532	Upregulated	225952	X	+	581729	585472	TCONS_00230715	2	2965	XLOC_063731	ENSSSCG00000041532
ENSSSCG00000028204	Upregulated	133608	9	-	45949894	45954353	TCONS_00221989	12	1431	XLOC_060377	TREH	trehalase [Source:VGNC Symbol;Acc:VGNC:94382]
ENSSSCG00000028204	Upregulated	133609	9	-	45949894	45965341	TCONS_00221990	15	1893	XLOC_060377	TREH	trehalase [Source:VGNC Symbol;Acc:VGNC:94382]
ENSSSCG00000028204	Upregulated	133610	9	-	45949894	45965341	TCONS_00221991	14	1730	XLOC_060377	TREH	trehalase [Source:VGNC Symbol;Acc:VGNC:94382]
ENSSSCG00000028204	Upregulated	133611	9	-	45949894	45965341	TCONS_00221992	15	1893	XLOC_060377	TREH	trehalase [Source:VGNC Symbol;Acc:VGNC:94382]
ENSSSCG00000028204	Upregulated	133612	9	-	45949894	45965341	TCONS_00221993	14	1800	XLOC_060377	TREH	trehalase [Source:VGNC Symbol;Acc:VGNC:94382]
ENSSSCG00000028204	Upregulated	133613	9	-	45949894	45971406	TCONS_00221994	15	2524	XLOC_060377	TREH	trehalase [Source:VGNC Symbol;Acc:VGNC:94382]
ENSSSCG00000028204	Upregulated	133614	9	-	45949894	45982368	TCONS_00221995	18	2818	XLOC_060377	TREH	trehalase [Source:VGNC Symbol;Acc:VGNC:94382]
ENSSSCG00000028204	Upregulated	133615	9	-	45949895	45962416	TCONS_00221996	15	3677	XLOC_060377	TREH	trehalase [Source:VGNC Symbol;Acc:VGNC:94382]
ENSSSCG00000035071	Upregulated	66814	4	-	94748214	94768432	TCONS_00153796	15	2545	XLOC_041727	DCST1	DC-STAMP domain containing 1 [Source:VGNC Symbol;Acc:VGNC:87190]
ENSSSCG00000035071	Upregulated	66815	4	-	94748214	94768432	TCONS_00153797	16	2620	XLOC_041727	DCST1	DC-STAMP domain containing 1 [Source:VGNC Symbol;Acc:VGNC:87190]
ENSSSCG00000035071	Upregulated	66816	4	+	94752205	94753797	TCONS_00147209	3	253	XLOC_039957	DCST1	DC-STAMP domain containing 1 [Source:VGNC Symbol;Acc:VGNC:87190]
ENSSSCG00000035071	Upregulated	66817	4	+	94753075	94753976	TCONS_00147210	3	349	XLOC_039957	DCST1	DC-STAMP domain containing 1 [Source:VGNC Symbol;Acc:VGNC:87190]
ENSSSCG00000035071	Upregulated	66818	4	-	94754753	94768432	TCONS_00153798	10	1478	XLOC_041727	DCST1	DC-STAMP domain containing 1 [Source:VGNC Symbol;Acc:VGNC:87190]
ENSSSCG00000015137	Upregulated	134221	9	+	49783731	49810068	TCONS_00216218	11	1215	XLOC_058691	CRTAM	cytotoxic and regulatory T cell molecule [Source:VGNC Symbol;Acc:VGNC:87005]
ENSSSCG00000015137	Upregulated	134222	9	+	49783731	49811313	TCONS_00216219	11	2460	XLOC_058691	CRTAM	cytotoxic and regulatory T cell molecule [Source:VGNC Symbol;Acc:VGNC:87005]
ENSSSCG00000015137	Upregulated	134223	9	+	49783731	49811313	TCONS_00216220	11	2457	XLOC_058691	CRTAM	cytotoxic and regulatory T cell molecule [Source:VGNC Symbol;Acc:VGNC:87005]
ENSSSCG00000015137	Upregulated	134224	9	+	49783731	49811313	TCONS_00216221	11	2574	XLOC_058691	CRTAM	cytotoxic and regulatory T cell molecule [Source:VGNC Symbol;Acc:VGNC:87005]
ENSSSCG00000015137	Upregulated	134225	9	+	49783731	49811313	TCONS_00216222	11	2460	XLOC_058691	CRTAM	cytotoxic and regulatory T cell molecule [Source:VGNC Symbol;Acc:VGNC:87005]
ENSSSCG00000015137	Upregulated	134226	9	+	49783792	49811313	TCONS_00216223	11	2450	XLOC_058691	CRTAM	cytotoxic and regulatory T cell molecule [Source:VGNC Symbol;Acc:VGNC:87005]
ENSSSCG00000015137	Upregulated	134227	9	+	49783909	49811313	TCONS_00216224	10	2405	XLOC_058691	CRTAM	cytotoxic and regulatory T cell molecule [Source:VGNC Symbol;Acc:VGNC:87005]
ENSSSCG00000015137	Upregulated	134228	9	+	49784044	49811295	TCONS_00216225	10	2366	XLOC_058691	CRTAM	cytotoxic and regulatory T cell molecule [Source:VGNC Symbol;Acc:VGNC:87005]
ENSSSCG00000015137	Upregulated	134229	9	-	49797140	49811144	TCONS_00222254	6	1745	XLOC_060461	CRTAM	cytotoxic and regulatory T cell molecule [Source:VGNC Symbol;Acc:VGNC:87005]
ENSSSCG00000015137	Upregulated	134230	9	+	49809711	49955121	TCONS_00216226	2	123	XLOC_058692	CRTAM	cytotoxic and regulatory T cell molecule [Source:VGNC Symbol;Acc:VGNC:87005]
ENSSSCG00000039821	Upregulated	128102	8	+	129792144	129878509	TCONS_00208280	6	11696	XLOC_056434	ENSSSCG00000039821
ENSSSCG00000039821	Upregulated	128103	8	+	129792152	129878509	TCONS_00208281	4	11994	XLOC_056434	ENSSSCG00000039821
ENSSSCG00000039821	Upregulated	128104	8	+	129792170	129878509	TCONS_00208282	6	11994	XLOC_056434	ENSSSCG00000039821
ENSSSCG00000039821	Upregulated	128105	8	+	129792170	129878509	TCONS_00208283	6	11994	XLOC_056434	ENSSSCG00000039821
ENSSSCG00000039821	Upregulated	128106	8	+	129799950	129878509	TCONS_00208284	9	11677	XLOC_056434	ENSSSCG00000039821
ENSSSCG00000039821	Upregulated	128107	8	+	129801494	129878509	TCONS_00208285	6	12282	XLOC_056434	ENSSSCG00000039821
ENSSSCG00000039821	Upregulated	128108	8	+	129802039	129874408	TCONS_00208286	3	7158	XLOC_056434	ENSSSCG00000039821
ENSSSCG00000039821	Upregulated	128114	8	+	129845466	129878509	TCONS_00208288	2	11546	XLOC_056434	ENSSSCG00000039821
ENSSSCG00000039821	Upregulated	128116	8	+	129867164	129869489	TCONS_00208290	5	2163	XLOC_056434	ENSSSCG00000039821
ENSSSCG00000039821	Upregulated	128117	8	+	129870538	129878509	TCONS_00208291	2	7742	XLOC_056434	ENSSSCG00000039821
ENSSSCG00000041798	Upregulated	134918	9	-	56440122	56448123	TCONS_00222584	2	367	XLOC_060565	ENSSSCG00000041798
ENSSSCG00000041798	Upregulated	134919	9	-	56440122	56453873	TCONS_00222585	3	747	XLOC_060565	ENSSSCG00000041798
ENSSSCG00000041798	Upregulated	134920	9	-	56440122	56454046	TCONS_00222586	3	503	XLOC_060565	ENSSSCG00000041798
ENSSSCG00000041798	Upregulated	134921	9	-	56440122	56461168	TCONS_00222587	3	6228	XLOC_060565	ENSSSCG00000041798
ENSSSCG00000041798	Upregulated	134922	9	-	56440122	56468579	TCONS_00222588	4	4170	XLOC_060565	ENSSSCG00000041798
ENSSSCG00000041798	Upregulated	134925	9	+	56440190	56454109	TCONS_00216583	3	498	XLOC_058797	ENSSSCG00000041798
ENSSSCG00000041798	Upregulated	134926	9	+	56440190	56477569	TCONS_00216584	7	4874	XLOC_058797	ENSSSCG00000041798
ENSSSCG00000041798	Upregulated	134927	9	+	56440221	56454109	TCONS_00216585	3	884	XLOC_058797	ENSSSCG00000041798
ENSSSCG00000041798	Upregulated	134928	9	+	56440221	56477569	TCONS_00216586	6	4740	XLOC_058797	ENSSSCG00000041798
ENSSSCG00000041798	Upregulated	134929	9	+	56440257	56477569	TCONS_00216587	7	8611	XLOC_058797	ENSSSCG00000041798
ENSSSCG00000041798	Upregulated	134930	9	+	56440257	56477569	TCONS_00216588	8	4823	XLOC_058797	ENSSSCG00000041798
ENSSSCG00000041798	Upregulated	134931	9	+	56445107	56451133	TCONS_00216589	2	5740	XLOC_058797	ENSSSCG00000041798
ENSSSCG00000005167	Upregulated	15780	1	+	203059588	203333792	TCONS_00007756	9	7088	XLOC_002218	SLC24A2	solute carrier family 24 member 2 [Source:VGNC Symbol;Acc:VGNC:92987]
ENSSSCG00000005167	Upregulated	15781	1	+	203059588	203333939	TCONS_00007757	10	7274	XLOC_002218	SLC24A2	solute carrier family 24 member 2 [Source:VGNC Symbol;Acc:VGNC:92987]
ENSSSCG00000005167	Upregulated	15782	1	+	203059687	203333792	TCONS_00007758	11	7079	XLOC_002218	SLC24A2	solute carrier family 24 member 2 [Source:VGNC Symbol;Acc:VGNC:92987]
ENSSSCG00000005167	Upregulated	15783	1	-	203258935	203323588	TCONS_00018933	6	590	XLOC_005237	SLC24A2	solute carrier family 24 member 2 [Source:VGNC Symbol;Acc:VGNC:92987]
ENSSSCG00000005167	Upregulated	15784	1	-	203332238	203333464	TCONS_00018934	1	1227	XLOC_005238	SLC24A2	solute carrier family 24 member 2 [Source:VGNC Symbol;Acc:VGNC:92987]
ENSSSCG00000021540	Upregulated	67635	4	+	97367459	97369598	TCONS_00147622	2	1257	XLOC_040100	C2CD4D	C2 calcium dependent domain containing 4D [Source:VGNC Symbol;Acc:VGNC:85994]
ENSSSCG00000021540	Upregulated	67636	4	+	97367511	97369598	TCONS_00147623	2	1224	XLOC_040100	C2CD4D	C2 calcium dependent domain containing 4D [Source:VGNC Symbol;Acc:VGNC:85994]
ENSSSCG00000021540	Upregulated	67638	4	+	97368453	97369514	TCONS_00147625	1	1062	XLOC_040100	C2CD4D	C2 calcium dependent domain containing 4D [Source:VGNC Symbol;Acc:VGNC:85994]
ENSSSCG00000021540	Upregulated	67639	4	-	97369260	97369859	TCONS_00154198	1	600	XLOC_041882	C2CD4D	C2 calcium dependent domain containing 4D [Source:VGNC Symbol;Acc:VGNC:85994]
ENSSSCG00000005122	Upregulated	15328	1	-	195937394	196029496	TCONS_00018732	22	6542	XLOC_005126	TEK	TEK receptor tyrosine kinase [Source:VGNC Symbol;Acc:VGNC:93866]
ENSSSCG00000005122	Upregulated	15329	1	-	195937394	196029496	TCONS_00018733	23	6683	XLOC_005126	TEK	TEK receptor tyrosine kinase [Source:VGNC Symbol;Acc:VGNC:93866]
ENSSSCG00000005122	Upregulated	15330	1	-	195937394	196029496	TCONS_00018734	24	6599	XLOC_005126	TEK	TEK receptor tyrosine kinase [Source:VGNC Symbol;Acc:VGNC:93866]
ENSSSCG00000005122	Upregulated	15331	1	-	195937394	196029496	TCONS_00018735	23	6458	XLOC_005126	TEK	TEK receptor tyrosine kinase [Source:VGNC Symbol;Acc:VGNC:93866]
ENSSSCG00000005122	Upregulated	15332	1	-	195937394	196051957	TCONS_00018736	23	6636	XLOC_005126	TEK	TEK receptor tyrosine kinase [Source:VGNC Symbol;Acc:VGNC:93866]
ENSSSCG00000005122	Upregulated	15333	1	-	195937394	196051957	TCONS_00018737	24	6549	XLOC_005126	TEK	TEK receptor tyrosine kinase [Source:VGNC Symbol;Acc:VGNC:93866]
ENSSSCG00000005122	Upregulated	15334	1	-	195937394	196051957	TCONS_00018738	23	6423	XLOC_005126	TEK	TEK receptor tyrosine kinase [Source:VGNC Symbol;Acc:VGNC:93866]
ENSSSCG00000005122	Upregulated	15335	1	-	195937394	196051957	TCONS_00018739	23	6411	XLOC_005126	TEK	TEK receptor tyrosine kinase [Source:VGNC Symbol;Acc:VGNC:93866]
ENSSSCG00000005122	Upregulated	15336	1	-	195937394	196051957	TCONS_00018740	24	6552	XLOC_005126	TEK	TEK receptor tyrosine kinase [Source:VGNC Symbol;Acc:VGNC:93866]
ENSSSCG00000005122	Upregulated	15337	1	-	195937394	196051957	TCONS_00018741	23	6423	XLOC_005126	TEK	TEK receptor tyrosine kinase [Source:VGNC Symbol;Acc:VGNC:93866]
ENSSSCG00000005122	Upregulated	15338	1	-	195939562	196029496	TCONS_00018742	23	4515	XLOC_005126	TEK	TEK receptor tyrosine kinase [Source:VGNC Symbol;Acc:VGNC:93866]
ENSSSCG00000005122	Upregulated	15339	1	+	195939605	195940545	TCONS_00007507	1	941	XLOC_002095	TEK	TEK receptor tyrosine kinase [Source:VGNC Symbol;Acc:VGNC:93866]
ENSSSCG00000005122	Upregulated	15340	1	-	195943916	196029496	TCONS_00018743	19	3279	XLOC_005126	TEK	TEK receptor tyrosine kinase [Source:VGNC Symbol;Acc:VGNC:93866]
ENSSSCG00000005122	Upregulated	15341	1	+	195944078	195952583	TCONS_00007508	5	434	XLOC_002096	TEK	TEK receptor tyrosine kinase [Source:VGNC Symbol;Acc:VGNC:93866]
ENSSSCG00000005122	Upregulated	15342	1	+	195959768	195961672	TCONS_00007509	2	507	XLOC_002097	TEK	TEK receptor tyrosine kinase [Source:VGNC Symbol;Acc:VGNC:93866]
ENSSSCG00000005122	Upregulated	15343	1	+	195990624	196008730	TCONS_00007510	4	489	XLOC_002098	TEK	TEK receptor tyrosine kinase [Source:VGNC Symbol;Acc:VGNC:93866]
ENSSSCG00000001484	Upregulated	109372	7	-	26445695	26486679	TCONS_00198943	3	3663	XLOC_053836	TINAG	tubulointerstitial nephritis antigen [Source:VGNC Symbol;Acc:VGNC:93998]
ENSSSCG00000001484	Upregulated	109373	7	-	26445695	26522965	TCONS_00198944	12	4878	XLOC_053836	TINAG	tubulointerstitial nephritis antigen [Source:VGNC Symbol;Acc:VGNC:93998]
ENSSSCG00000001484	Upregulated	109374	7	-	26445695	26522965	TCONS_00198945	11	4828	XLOC_053836	TINAG	tubulointerstitial nephritis antigen [Source:VGNC Symbol;Acc:VGNC:93998]
ENSSSCG00000001484	Upregulated	109375	7	-	26445695	26522965	TCONS_00198946	12	4878	XLOC_053836	TINAG	tubulointerstitial nephritis antigen [Source:VGNC Symbol;Acc:VGNC:93998]
ENSSSCG00000001484	Upregulated	109376	7	-	26445695	26522965	TCONS_00198947	11	4832	XLOC_053836	TINAG	tubulointerstitial nephritis antigen [Source:VGNC Symbol;Acc:VGNC:93998]
ENSSSCG00000001484	Upregulated	109377	7	-	26445695	26522965	TCONS_00198948	11	4828	XLOC_053836	TINAG	tubulointerstitial nephritis antigen [Source:VGNC Symbol;Acc:VGNC:93998]
ENSSSCG00000001484	Upregulated	109378	7	-	26445695	26522965	TCONS_00198949	11	4832	XLOC_053836	TINAG	tubulointerstitial nephritis antigen [Source:VGNC Symbol;Acc:VGNC:93998]
ENSSSCG00000001484	Upregulated	109379	7	-	26445695	26523054	TCONS_00198950	12	4967	XLOC_053836	TINAG	tubulointerstitial nephritis antigen [Source:VGNC Symbol;Acc:VGNC:93998]
ENSSSCG00000001484	Upregulated	109380	7	-	26445695	26526066	TCONS_00198951	11	4837	XLOC_053836	TINAG	tubulointerstitial nephritis antigen [Source:VGNC Symbol;Acc:VGNC:93998]
ENSSSCG00000001484	Upregulated	109381	7	-	26446306	26522357	TCONS_00198952	11	4293	XLOC_053836	TINAG	tubulointerstitial nephritis antigen [Source:VGNC Symbol;Acc:VGNC:93998]
ENSSSCG00000001484	Upregulated	109382	7	+	26448701	26493720	TCONS_00191974	6	913	XLOC_051907	TINAG	tubulointerstitial nephritis antigen [Source:VGNC Symbol;Acc:VGNC:93998]
ENSSSCG00000001484	Upregulated	109383	7	-	26448759	26522355	TCONS_00198953	10	1792	XLOC_053836	TINAG	tubulointerstitial nephritis antigen [Source:VGNC Symbol;Acc:VGNC:93998]
ENSSSCG00000001484	Upregulated	109384	7	-	26448929	26522965	TCONS_00198954	12	1644	XLOC_053836	TINAG	tubulointerstitial nephritis antigen [Source:VGNC Symbol;Acc:VGNC:93998]
ENSSSCG00000001484	Upregulated	109385	7	+	26498015	26526114	TCONS_00191975	6	767	XLOC_051908	TINAG	tubulointerstitial nephritis antigen [Source:VGNC Symbol;Acc:VGNC:93998]
ENSSSCG00000001484	Upregulated	109386	7	-	26508385	26522965	TCONS_00198955	5	743	XLOC_053836	TINAG	tubulointerstitial nephritis antigen [Source:VGNC Symbol;Acc:VGNC:93998]
ENSSSCG00000015255	Upregulated	135146	9	-	60479030	60522066	TCONS_00222704	20	5129	XLOC_060596	IGSF9B	immunoglobulin superfamily member 9B [Source:HGNC Symbol;Acc:HGNC:32326]
ENSSSCG00000015255	Upregulated	135147	9	-	60479030	60522066	TCONS_00222705	20	5129	XLOC_060596	IGSF9B	immunoglobulin superfamily member 9B [Source:HGNC Symbol;Acc:HGNC:32326]
ENSSSCG00000015255	Upregulated	135148	9	-	60479030	60522066	TCONS_00222706	20	5129	XLOC_060596	IGSF9B	immunoglobulin superfamily member 9B [Source:HGNC Symbol;Acc:HGNC:32326]
ENSSSCG00000015255	Upregulated	135149	9	-	60487538	60522066	TCONS_00222707	20	4934	XLOC_060596	IGSF9B	immunoglobulin superfamily member 9B [Source:HGNC Symbol;Acc:HGNC:32326]
ENSSSCG00000015255	Upregulated	135150	9	-	60487538	60522066	TCONS_00222708	19	4844	XLOC_060596	IGSF9B	immunoglobulin superfamily member 9B [Source:HGNC Symbol;Acc:HGNC:32326]
ENSSSCG00000015255	Upregulated	135151	9	-	60487538	60522066	TCONS_00222709	20	4934	XLOC_060596	IGSF9B	immunoglobulin superfamily member 9B [Source:HGNC Symbol;Acc:HGNC:32326]
ENSSSCG00000038080	Upregulated	127663	8	+	120138279	120220407	TCONS_00208072	11	846	XLOC_056365	EMCN	endomucin [Source:VGNC Symbol;Acc:VGNC:87674]
ENSSSCG00000038080	Upregulated	127664	8	+	120138279	120230966	TCONS_00208073	12	5129	XLOC_056365	EMCN	endomucin [Source:VGNC Symbol;Acc:VGNC:87674]
ENSSSCG00000038080	Upregulated	127665	8	+	120138279	120230966	TCONS_00208074	12	5111	XLOC_056365	EMCN	endomucin [Source:VGNC Symbol;Acc:VGNC:87674]
ENSSSCG00000038080	Upregulated	127666	8	+	120145804	120230944	TCONS_00208075	12	5083	XLOC_056365	EMCN	endomucin [Source:VGNC Symbol;Acc:VGNC:87674]
ENSSSCG00000038080	Upregulated	127667	8	+	120145804	120230966	TCONS_00208076	12	5108	XLOC_056365	EMCN	endomucin [Source:VGNC Symbol;Acc:VGNC:87674]
ENSSSCG00000038080	Upregulated	127668	8	+	120145804	120230966	TCONS_00208077	12	5105	XLOC_056365	EMCN	endomucin [Source:VGNC Symbol;Acc:VGNC:87674]
ENSSSCG00000038080	Upregulated	127669	8	+	120145804	120230966	TCONS_00208078	12	5105	XLOC_056365	EMCN	endomucin [Source:VGNC Symbol;Acc:VGNC:87674]
ENSSSCG00000038080	Upregulated	127670	8	-	120175690	120227120	TCONS_00212888	10	1450	XLOC_057747	EMCN	endomucin [Source:VGNC Symbol;Acc:VGNC:87674]
ENSSSCG00000038080	Upregulated	127672	8	-	120218241	120226937	TCONS_00212889	3	701	XLOC_057747	EMCN	endomucin [Source:VGNC Symbol;Acc:VGNC:87674]
ENSSSCG00000005707	Upregulated	21612	1	-	270918249	270956350	TCONS_00021812	8	5045	XLOC_005992	FIBCD1	fibrinogen C domain containing 1 [Source:VGNC Symbol;Acc:VGNC:88133]
ENSSSCG00000005081	Upregulated	14873	1	+	188966632	189081902	TCONS_00007244	32	5899	XLOC_002028	LRRC9	leucine rich repeat containing 9 [Source:VGNC Symbol;Acc:VGNC:103120]
ENSSSCG00000005081	Upregulated	14874	1	+	188966637	189081732	TCONS_00007245	31	5583	XLOC_002028	LRRC9	leucine rich repeat containing 9 [Source:VGNC Symbol;Acc:VGNC:103120]
ENSSSCG00000005081	Upregulated	14875	1	+	188966637	189081902	TCONS_00007246	32	5972	XLOC_002028	LRRC9	leucine rich repeat containing 9 [Source:VGNC Symbol;Acc:VGNC:103120]
ENSSSCG00000005081	Upregulated	14876	1	+	188966637	189081902	TCONS_00007247	33	6111	XLOC_002028	LRRC9	leucine rich repeat containing 9 [Source:VGNC Symbol;Acc:VGNC:103120]
ENSSSCG00000005081	Upregulated	14877	1	+	188966637	189081902	TCONS_00007248	33	6090	XLOC_002028	LRRC9	leucine rich repeat containing 9 [Source:VGNC Symbol;Acc:VGNC:103120]
ENSSSCG00000005081	Upregulated	14878	1	+	188966688	189081736	TCONS_00007249	33	5896	XLOC_002028	LRRC9	leucine rich repeat containing 9 [Source:VGNC Symbol;Acc:VGNC:103120]
ENSSSCG00000005081	Upregulated	14879	1	+	188967702	189170531	TCONS_00007250	8	1976	XLOC_002029	LRRC9	leucine rich repeat containing 9 [Source:VGNC Symbol;Acc:VGNC:103120]
ENSSSCG00000039041	Upregulated	225758	18	-	55775264	55783421	TCONS_00106716	7	4755	XLOC_029373	ZNF467	zinc finger protein 467 [Source:HGNC Symbol;Acc:HGNC:23154]
ENSSSCG00000039041	Upregulated	225759	18	-	55775264	55783421	TCONS_00106717	7	4509	XLOC_029373	ZNF467	zinc finger protein 467 [Source:HGNC Symbol;Acc:HGNC:23154]
ENSSSCG00000039041	Upregulated	225760	18	-	55775264	55783421	TCONS_00106718	7	1955	XLOC_029373	ZNF467	zinc finger protein 467 [Source:HGNC Symbol;Acc:HGNC:23154]
ENSSSCG00000039041	Upregulated	225761	18	-	55776780	55783237	TCONS_00106719	5	3016	XLOC_029373	ZNF467	zinc finger protein 467 [Source:HGNC Symbol;Acc:HGNC:23154]
ENSSSCG00000039041	Upregulated	225762	18	+	55777660	55781434	TCONS_00104047	3	2571	XLOC_028599	ZNF467	zinc finger protein 467 [Source:HGNC Symbol;Acc:HGNC:23154]
ENSSSCG00000039041	Upregulated	225763	18	+	55777660	55781434	TCONS_00104048	4	2227	XLOC_028599	ZNF467	zinc finger protein 467 [Source:HGNC Symbol;Acc:HGNC:23154]
ENSSSCG00000037025	Upregulated	30527	2	+	60324560	60344448	TCONS_00110828	7	2436	XLOC_030483	PLVAP	plasmalemma vesicle associated protein [Source:VGNC Symbol;Acc:VGNC:91577]
ENSSSCG00000037025	Upregulated	30528	2	+	60324560	60344448	TCONS_00110829	8	2316	XLOC_030483	PLVAP	plasmalemma vesicle associated protein [Source:VGNC Symbol;Acc:VGNC:91577]
ENSSSCG00000037025	Upregulated	30529	2	+	60324560	60344448	TCONS_00110830	7	2436	XLOC_030483	PLVAP	plasmalemma vesicle associated protein [Source:VGNC Symbol;Acc:VGNC:91577]
ENSSSCG00000037025	Upregulated	30530	2	-	60325310	60344443	TCONS_00120638	4	1914	XLOC_032968	PLVAP	plasmalemma vesicle associated protein [Source:VGNC Symbol;Acc:VGNC:91577]
ENSSSCG00000037025	Upregulated	30531	2	-	60325310	60344443	TCONS_00120639	7	1934	XLOC_032968	PLVAP	plasmalemma vesicle associated protein [Source:VGNC Symbol;Acc:VGNC:91577]
ENSSSCG00000051246	Upregulated	125158	8	+	76419695	76426597	TCONS_00206856	2	5987	XLOC_055979	ENSSSCG00000051246
ENSSSCG00000002814	Upregulated	86691	6	+	19574399	19599082	TCONS_00169792	12	2781	XLOC_046115	ADGRG3	adhesion G protein-coupled receptor G3 [Source:VGNC Symbol;Acc:VGNC:85131]
ENSSSCG00000002814	Upregulated	86692	6	+	19574514	19599082	TCONS_00169793	12	2666	XLOC_046115	ADGRG3	adhesion G protein-coupled receptor G3 [Source:VGNC Symbol;Acc:VGNC:85131]
ENSSSCG00000002814	Upregulated	86693	6	+	19574514	19599082	TCONS_00169794	12	2666	XLOC_046115	ADGRG3	adhesion G protein-coupled receptor G3 [Source:VGNC Symbol;Acc:VGNC:85131]
ENSSSCG00000002814	Upregulated	86694	6	-	19589574	19591872	TCONS_00180578	5	713	XLOC_048874	ADGRG3	adhesion G protein-coupled receptor G3 [Source:VGNC Symbol;Acc:VGNC:85131]
ENSSSCG00000002814	Upregulated	86695	6	+	19593110	19599082	TCONS_00169795	5	1753	XLOC_046115	ADGRG3	adhesion G protein-coupled receptor G3 [Source:VGNC Symbol;Acc:VGNC:85131]
ENSSSCG00000002814	Upregulated	86696	6	-	19593166	19594237	TCONS_00180579	2	911	XLOC_048875	ADGRG3	adhesion G protein-coupled receptor G3 [Source:VGNC Symbol;Acc:VGNC:85131]
ENSSSCG00000002814	Upregulated	86697	6	-	19594663	19599036	TCONS_00180580	2	2610	XLOC_048876	ADGRG3	adhesion G protein-coupled receptor G3 [Source:VGNC Symbol;Acc:VGNC:85131]
ENSSSCG00000048255	Upregulated	114431	7	-	64561646	64571090	TCONS_00201479	2	238	XLOC_054410	ENSSSCG00000048255
ENSSSCG00000048255	Upregulated	114432	7	+	64561733	64563728	TCONS_00194491	3	949	XLOC_052516	ENSSSCG00000048255
ENSSSCG00000016548	Upregulated	222449	18	+	17444339	17494884	TCONS_00102443	8	6189	XLOC_028119	ENSSSCG00000016548
ENSSSCG00000016548	Upregulated	222450	18	-	17484060	17485546	TCONS_00105017	2	309	XLOC_028881	ENSSSCG00000016548
ENSSSCG00000016548	Upregulated	222451	18	-	17486011	17488972	TCONS_00105018	4	418	XLOC_028882	ENSSSCG00000016548
ENSSSCG00000016548	Upregulated	222452	18	-	17492698	17494372	TCONS_00105019	1	1675	XLOC_028883	ENSSSCG00000016548
ENSSSCG00000049501	Upregulated	187	1	+	830860	838755	TCONS_00000101	2	7265	XLOC_000028	ENSSSCG00000049501
ENSSSCG00000049501	Upregulated	188	1	+	830860	847692	TCONS_00000102	3	5660	XLOC_000028	ENSSSCG00000049501
ENSSSCG00000049501	Upregulated	189	1	+	836193	845492	TCONS_00000103	2	1810	XLOC_000028	ENSSSCG00000049501
ENSSSCG00000041066	Upregulated	70230	4	+	111635931	111723963	TCONS_00148854	6	4195	XLOC_040388	ENSSSCG00000041066
ENSSSCG00000041066	Upregulated	70231	4	+	111719804	111725091	TCONS_00148855	2	1588	XLOC_040388	ENSSSCG00000041066
ENSSSCG00000026754	Upregulated	33940	2	-	74626694	74906540	TCONS_00122327	5	855	XLOC_033380	ATCAY	ATCAY kinesin light chain interacting caytaxin [Source:VGNC Symbol;Acc:VGNC:85603]
ENSSSCG00000026754	Upregulated	33943	2	-	74628225	74906540	TCONS_00122328	5	484	XLOC_033380	ATCAY	ATCAY kinesin light chain interacting caytaxin [Source:VGNC Symbol;Acc:VGNC:85603]
ENSSSCG00000026754	Upregulated	34001	2	-	74800048	74838671	TCONS_00122357	13	4501	XLOC_033391	ATCAY	ATCAY kinesin light chain interacting caytaxin [Source:VGNC Symbol;Acc:VGNC:85603]
ENSSSCG00000033544	Upregulated	80676	5	-	65052517	65054676	TCONS_00166775	2	1261	XLOC_045261	NTF3	neurotrophin 3 [Source:VGNC Symbol;Acc:VGNC:90928]
ENSSSCG00000033544	Upregulated	80677	5	-	65052517	65059295	TCONS_00166776	2	1217	XLOC_045261	NTF3	neurotrophin 3 [Source:VGNC Symbol;Acc:VGNC:90928]
ENSSSCG00000033544	Upregulated	80678	5	-	65052517	65122019	TCONS_00166777	3	1549	XLOC_045261	NTF3	neurotrophin 3 [Source:VGNC Symbol;Acc:VGNC:90928]
ENSSSCG00000033544	Upregulated	80679	5	-	65052517	65122019	TCONS_00166778	2	1430	XLOC_045261	NTF3	neurotrophin 3 [Source:VGNC Symbol;Acc:VGNC:90928]
ENSSSCG00000033544	Upregulated	80680	5	+	65052558	65120831	TCONS_00160804	2	1239	XLOC_043603	NTF3	neurotrophin 3 [Source:VGNC Symbol;Acc:VGNC:90928]
ENSSSCG00000033544	Upregulated	80681	5	+	65052558	65122056	TCONS_00160805	2	1426	XLOC_043603	NTF3	neurotrophin 3 [Source:VGNC Symbol;Acc:VGNC:90928]
ENSSSCG00000033544	Upregulated	80682	5	-	65052609	65122019	TCONS_00166779	3	1457	XLOC_045261	NTF3	neurotrophin 3 [Source:VGNC Symbol;Acc:VGNC:90928]
ENSSSCG00000033544	Upregulated	80683	5	-	65052611	65123788	TCONS_00166780	2	1322	XLOC_045261	NTF3	neurotrophin 3 [Source:VGNC Symbol;Acc:VGNC:90928]
ENSSSCG00000033544	Upregulated	80684	5	-	65052750	65056253	TCONS_00166781	2	2407	XLOC_045261	NTF3	neurotrophin 3 [Source:VGNC Symbol;Acc:VGNC:90928]
ENSSSCG00000045003	Upregulated	149649	11	+	13307944	13310328	TCONS_00029708	2	2324	XLOC_008528	ENSSSCG00000045003
ENSSSCG00000045003	Upregulated	149650	11	+	13307944	13314187	TCONS_00029709	3	1841	XLOC_008528	ENSSSCG00000045003
ENSSSCG00000045003	Upregulated	149651	11	+	13307944	13490978	TCONS_00029710	3	2104	XLOC_008528	ENSSSCG00000045003
ENSSSCG00000014418	Upregulated	41276	2	+	148519678	148651232	TCONS_00116096	12	1473	XLOC_031796	STK32A	serine/threonine kinase 32A [Source:VGNC Symbol;Acc:VGNC:93552]
ENSSSCG00000014418	Upregulated	41277	2	+	148519678	148659462	TCONS_00116097	12	4903	XLOC_031796	STK32A	serine/threonine kinase 32A [Source:VGNC Symbol;Acc:VGNC:93552]
ENSSSCG00000014418	Upregulated	41278	2	+	148519678	148659462	TCONS_00116098	13	4993	XLOC_031796	STK32A	serine/threonine kinase 32A [Source:VGNC Symbol;Acc:VGNC:93552]
ENSSSCG00000014418	Upregulated	41279	2	+	148519678	148659462	TCONS_00116099	12	4928	XLOC_031796	STK32A	serine/threonine kinase 32A [Source:VGNC Symbol;Acc:VGNC:93552]
ENSSSCG00000014418	Upregulated	41280	2	+	148519678	148659462	TCONS_00116100	12	4820	XLOC_031796	STK32A	serine/threonine kinase 32A [Source:VGNC Symbol;Acc:VGNC:93552]
ENSSSCG00000014418	Upregulated	41281	2	+	148519678	148659462	TCONS_00116101	14	5054	XLOC_031796	STK32A	serine/threonine kinase 32A [Source:VGNC Symbol;Acc:VGNC:93552]
ENSSSCG00000014418	Upregulated	41282	2	+	148519678	148659462	TCONS_00116102	13	5018	XLOC_031796	STK32A	serine/threonine kinase 32A [Source:VGNC Symbol;Acc:VGNC:93552]
ENSSSCG00000014418	Upregulated	41283	2	+	148519678	148659462	TCONS_00116103	13	4990	XLOC_031796	STK32A	serine/threonine kinase 32A [Source:VGNC Symbol;Acc:VGNC:93552]
ENSSSCG00000014418	Upregulated	41284	2	+	148519678	148659462	TCONS_00116104	13	4993	XLOC_031796	STK32A	serine/threonine kinase 32A [Source:VGNC Symbol;Acc:VGNC:93552]
ENSSSCG00000014418	Upregulated	41285	2	-	148519816	148659433	TCONS_00126086	12	4736	XLOC_034350	STK32A	serine/threonine kinase 32A [Source:VGNC Symbol;Acc:VGNC:93552]
ENSSSCG00000014418	Upregulated	41286	2	-	148519816	148659433	TCONS_00126087	13	4826	XLOC_034350	STK32A	serine/threonine kinase 32A [Source:VGNC Symbol;Acc:VGNC:93552]
ENSSSCG00000014418	Upregulated	41287	2	+	148529534	148659462	TCONS_00116105	11	4489	XLOC_031796	STK32A	serine/threonine kinase 32A [Source:VGNC Symbol;Acc:VGNC:93552]
ENSSSCG00000014418	Upregulated	41288	2	+	148556846	148659462	TCONS_00116106	12	4602	XLOC_031796	STK32A	serine/threonine kinase 32A [Source:VGNC Symbol;Acc:VGNC:93552]
ENSSSCG00000014418	Upregulated	41289	2	+	148556870	148659462	TCONS_00116107	12	4578	XLOC_031796	STK32A	serine/threonine kinase 32A [Source:VGNC Symbol;Acc:VGNC:93552]
ENSSSCG00000014418	Upregulated	41290	2	-	148638429	148659433	TCONS_00126088	7	4044	XLOC_034350	STK32A	serine/threonine kinase 32A [Source:VGNC Symbol;Acc:VGNC:93552]
ENSSSCG00000014418	Upregulated	41291	2	-	148647915	148659433	TCONS_00126089	4	3823	XLOC_034350	STK32A	serine/threonine kinase 32A [Source:VGNC Symbol;Acc:VGNC:93552]
ENSSSCG00000022384	Upregulated	232912	X	-	118446401	118450375	TCONS_00238182	2	3899	XLOC_065918	ENSSSCG00000022384
ENSSSCG00000022384	Upregulated	232913	X	-	118446401	118453447	TCONS_00238183	2	3752	XLOC_065918	ENSSSCG00000022384
ENSSSCG00000022384	Upregulated	232914	X	-	118446401	118472638	TCONS_00238184	3	3812	XLOC_065918	ENSSSCG00000022384
ENSSSCG00000022384	Upregulated	232915	X	-	118446401	118567379	TCONS_00238185	3	4428	XLOC_065918	ENSSSCG00000022384
ENSSSCG00000022384	Upregulated	232916	X	-	118446401	118567379	TCONS_00238186	3	4523	XLOC_065918	ENSSSCG00000022384
ENSSSCG00000022384	Upregulated	232917	X	+	118448544	118450606	TCONS_00234160	1	2063	XLOC_064758	ENSSSCG00000022384
ENSSSCG00000022384	Upregulated	232918	X	+	118448732	118566800	TCONS_00234161	4	1601	XLOC_064758	ENSSSCG00000022384
ENSSSCG00000022384	Upregulated	232919	X	+	118448762	118451994	TCONS_00234162	2	1446	XLOC_064758	ENSSSCG00000022384
ENSSSCG00000022384	Upregulated	232920	X	+	118448762	118566800	TCONS_00234163	3	1488	XLOC_064758	ENSSSCG00000022384
ENSSSCG00000022384	Upregulated	232921	X	+	118471891	118566800	TCONS_00234164	4	763	XLOC_064758	ENSSSCG00000022384
ENSSSCG00000022384	Upregulated	232922	X	+	118527609	118566800	TCONS_00234165	3	422	XLOC_064758	ENSSSCG00000022384
ENSSSCG00000008841	Upregulated	122705	8	-	40859549	41021387	TCONS_00210370	6	3600	XLOC_056983	PDGFRA	platelet derived growth factor receptor alpha [Source:VGNC Symbol;Acc:VGNC:98179]
ENSSSCG00000008841	Upregulated	122718	8	-	40966646	41021376	TCONS_00210378	23	6187	XLOC_056983	PDGFRA	platelet derived growth factor receptor alpha [Source:VGNC Symbol;Acc:VGNC:98179]
ENSSSCG00000008841	Upregulated	122719	8	+	40967493	41021441	TCONS_00205656	24	6521	XLOC_055610	PDGFRA	platelet derived growth factor receptor alpha [Source:VGNC Symbol;Acc:VGNC:98179]
ENSSSCG00000008841	Upregulated	122720	8	+	40967493	41021442	TCONS_00205657	25	6484	XLOC_055610	PDGFRA	platelet derived growth factor receptor alpha [Source:VGNC Symbol;Acc:VGNC:98179]
ENSSSCG00000008841	Upregulated	122721	8	+	40967493	41021442	TCONS_00205658	25	6386	XLOC_055610	PDGFRA	platelet derived growth factor receptor alpha [Source:VGNC Symbol;Acc:VGNC:98179]
ENSSSCG00000008841	Upregulated	122722	8	-	40967537	41021385	TCONS_00210379	22	6174	XLOC_056983	PDGFRA	platelet derived growth factor receptor alpha [Source:VGNC Symbol;Acc:VGNC:98179]
ENSSSCG00000008841	Upregulated	122723	8	-	40967537	41021422	TCONS_00210380	23	6529	XLOC_056983	PDGFRA	platelet derived growth factor receptor alpha [Source:VGNC Symbol;Acc:VGNC:98179]
ENSSSCG00000008841	Upregulated	122724	8	-	40968660	41021363	TCONS_00210381	22	5930	XLOC_056983	PDGFRA	platelet derived growth factor receptor alpha [Source:VGNC Symbol;Acc:VGNC:98179]
ENSSSCG00000008841	Upregulated	122725	8	-	40968660	41021371	TCONS_00210382	23	6256	XLOC_056983	PDGFRA	platelet derived growth factor receptor alpha [Source:VGNC Symbol;Acc:VGNC:98179]
ENSSSCG00000008841	Upregulated	122726	8	+	40968732	41021442	TCONS_00205659	23	6255	XLOC_055610	PDGFRA	platelet derived growth factor receptor alpha [Source:VGNC Symbol;Acc:VGNC:98179]
ENSSSCG00000008841	Upregulated	122727	8	-	40969364	41021366	TCONS_00210383	23	6129	XLOC_056983	PDGFRA	platelet derived growth factor receptor alpha [Source:VGNC Symbol;Acc:VGNC:98179]
ENSSSCG00000008841	Upregulated	122728	8	-	40969364	41021371	TCONS_00210384	22	6117	XLOC_056983	PDGFRA	platelet derived growth factor receptor alpha [Source:VGNC Symbol;Acc:VGNC:98179]
ENSSSCG00000008841	Upregulated	122729	8	-	40969364	41021409	TCONS_00210385	23	6266	XLOC_056983	PDGFRA	platelet derived growth factor receptor alpha [Source:VGNC Symbol;Acc:VGNC:98179]
ENSSSCG00000008841	Upregulated	122730	8	+	40969393	41021442	TCONS_00205660	24	6232	XLOC_055610	PDGFRA	platelet derived growth factor receptor alpha [Source:VGNC Symbol;Acc:VGNC:98179]
ENSSSCG00000008841	Upregulated	122731	8	-	40970385	41021371	TCONS_00210386	23	6209	XLOC_056983	PDGFRA	platelet derived growth factor receptor alpha [Source:VGNC Symbol;Acc:VGNC:98179]
ENSSSCG00000008841	Upregulated	122732	8	+	40978396	41021442	TCONS_00205661	21	6088	XLOC_055610	PDGFRA	platelet derived growth factor receptor alpha [Source:VGNC Symbol;Acc:VGNC:98179]
ENSSSCG00000008841	Upregulated	122733	8	+	40978396	41021442	TCONS_00205662	24	6078	XLOC_055610	PDGFRA	platelet derived growth factor receptor alpha [Source:VGNC Symbol;Acc:VGNC:98179]
ENSSSCG00000008841	Upregulated	122734	8	+	40978396	41021442	TCONS_00205663	23	6063	XLOC_055610	PDGFRA	platelet derived growth factor receptor alpha [Source:VGNC Symbol;Acc:VGNC:98179]
ENSSSCG00000008841	Upregulated	122735	8	+	40987376	41021442	TCONS_00205664	16	5099	XLOC_055610	PDGFRA	platelet derived growth factor receptor alpha [Source:VGNC Symbol;Acc:VGNC:98179]
ENSSSCG00000008841	Upregulated	122736	8	-	40994914	41021399	TCONS_00210387	12	4376	XLOC_056983	PDGFRA	platelet derived growth factor receptor alpha [Source:VGNC Symbol;Acc:VGNC:98179]
ENSSSCG00000008841	Upregulated	122737	8	-	40999587	41021409	TCONS_00210388	8	3848	XLOC_056983	PDGFRA	platelet derived growth factor receptor alpha [Source:VGNC Symbol;Acc:VGNC:98179]
ENSSSCG00000008841	Upregulated	122739	8	+	41017531	41021442	TCONS_00205666	2	3147	XLOC_055610	PDGFRA	platelet derived growth factor receptor alpha [Source:VGNC Symbol;Acc:VGNC:98179]
ENSSSCG00000051258	Upregulated	186029	14	+	30371705	30375798	TCONS_00065454	2	4030	XLOC_018007	ENSSSCG00000051258
ENSSSCG00000011751	Upregulated	175583	13	-	110401165	110422617	TCONS_00060264	3	205	XLOC_016497	TMEM212	transmembrane protein 212 [Source:VGNC Symbol;Acc:VGNC:94138]
ENSSSCG00000011751	Upregulated	175584	13	-	110401165	110423692	TCONS_00060265	4	661	XLOC_016497	TMEM212	transmembrane protein 212 [Source:VGNC Symbol;Acc:VGNC:94138]
ENSSSCG00000011751	Upregulated	175585	13	-	110401165	110434136	TCONS_00060266	4	584	XLOC_016497	TMEM212	transmembrane protein 212 [Source:VGNC Symbol;Acc:VGNC:94138]
ENSSSCG00000011751	Upregulated	175586	13	+	110401263	110434355	TCONS_00051451	4	705	XLOC_014197	TMEM212	transmembrane protein 212 [Source:VGNC Symbol;Acc:VGNC:94138]
ENSSSCG00000011751	Upregulated	175587	13	-	110401277	110423692	TCONS_00060267	3	377	XLOC_016497	TMEM212	transmembrane protein 212 [Source:VGNC Symbol;Acc:VGNC:94138]
ENSSSCG00000011751	Upregulated	175588	13	+	110414319	110426109	TCONS_00051452	3	3057	XLOC_014197	TMEM212	transmembrane protein 212 [Source:VGNC Symbol;Acc:VGNC:94138]
ENSSSCG00000011751	Upregulated	175589	13	+	110414319	110434355	TCONS_00051453	4	954	XLOC_014197	TMEM212	transmembrane protein 212 [Source:VGNC Symbol;Acc:VGNC:94138]
ENSSSCG00000048476	Upregulated	126337	8	+	99174611	99188491	TCONS_00207426	2	3151	XLOC_056166	ENSSSCG00000048476
ENSSSCG00000048476	Upregulated	126338	8	+	99177267	99188400	TCONS_00207427	2	7261	XLOC_056166	ENSSSCG00000048476
ENSSSCG00000044652	Upregulated	164519	12	+	55512928	55526313	TCONS_00039986	2	3680	XLOC_011284	ENSSSCG00000044652
ENSSSCG00000044652	Upregulated	164524	12	+	55513253	55526166	TCONS_00039991	2	3262	XLOC_011284	ENSSSCG00000044652
ENSSSCG00000044652	Upregulated	164526	12	+	55521668	55530806	TCONS_00039992	3	936	XLOC_011285	ENSSSCG00000044652
ENSSSCG00000044652	Upregulated	164527	12	+	55521796	55530806	TCONS_00039993	3	353	XLOC_011285	ENSSSCG00000044652
ENSSSCG00000044652	Upregulated	164528	12	+	55522598	55530806	TCONS_00039994	2	668	XLOC_011285	ENSSSCG00000044652
ENSSSCG00000044652	Upregulated	164529	12	+	55522598	55617016	TCONS_00039995	2	878	XLOC_011285	ENSSSCG00000044652
ENSSSCG00000010336	Upregulated	192507	14	-	81805073	82107675	TCONS_00076166	4	1219	XLOC_020552	SFTPA1	surfactant protein A1 [Source:NCBI gene (formerly Entrezgene);Acc:397503]
ENSSSCG00000010336	Upregulated	192567	14	-	82091178	82095393	TCONS_00076206	4	2154	XLOC_020552	SFTPA1	surfactant protein A1 [Source:NCBI gene (formerly Entrezgene);Acc:397503]
ENSSSCG00000010336	Upregulated	192568	14	-	82091178	82095393	TCONS_00076207	5	1895	XLOC_020552	SFTPA1	surfactant protein A1 [Source:NCBI gene (formerly Entrezgene);Acc:397503]
ENSSSCG00000010336	Upregulated	192569	14	-	82091181	82107675	TCONS_00076208	6	5673	XLOC_020552	SFTPA1	surfactant protein A1 [Source:NCBI gene (formerly Entrezgene);Acc:397503]
ENSSSCG00000026486	Upregulated	13327	1	-	169636335	169645093	TCONS_00017738	11	3389	XLOC_004849	ENSSSCG00000026486
ENSSSCG00000026486	Upregulated	13328	1	-	169636335	169645093	TCONS_00017739	11	3389	XLOC_004849	ENSSSCG00000026486
ENSSSCG00000026486	Upregulated	13329	1	-	169636335	169864805	TCONS_00017740	2	1792	XLOC_004849	ENSSSCG00000026486
ENSSSCG00000026486	Upregulated	13330	1	+	169636337	169645116	TCONS_00006503	12	3258	XLOC_001777	ENSSSCG00000026486
ENSSSCG00000026486	Upregulated	13331	1	+	169636623	169642638	TCONS_00006504	7	2674	XLOC_001777	ENSSSCG00000026486
ENSSSCG00000026486	Upregulated	13332	1	-	169638116	169645093	TCONS_00017741	11	1608	XLOC_004849	ENSSSCG00000026486
ENSSSCG00000007933	Upregulated	47605	3	+	37606277	37618658	TCONS_00129363	10	2964	XLOC_035238	SEPTIN12	septin 12 [Source:NCBI gene (formerly Entrezgene);Acc:100624981]
ENSSSCG00000007933	Upregulated	47606	3	+	37606277	37627196	TCONS_00129364	10	1037	XLOC_035238	SEPTIN12	septin 12 [Source:NCBI gene (formerly Entrezgene);Acc:100624981]
ENSSSCG00000007933	Upregulated	47607	3	+	37606277	37628920	TCONS_00129365	10	2761	XLOC_035238	SEPTIN12	septin 12 [Source:NCBI gene (formerly Entrezgene);Acc:100624981]
ENSSSCG00000007933	Upregulated	47608	3	+	37606277	37628920	TCONS_00129366	10	2913	XLOC_035238	SEPTIN12	septin 12 [Source:NCBI gene (formerly Entrezgene);Acc:100624981]
ENSSSCG00000007933	Upregulated	47609	3	+	37606277	37628920	TCONS_00129367	10	2913	XLOC_035238	SEPTIN12	septin 12 [Source:NCBI gene (formerly Entrezgene);Acc:100624981]
ENSSSCG00000034623	Upregulated	200297	15	-	47104510	47163891	TCONS_00085125	12	1604	XLOC_023103	ENSSSCG00000034623
ENSSSCG00000034623	Upregulated	200298	15	-	47104510	47178927	TCONS_00085126	16	1878	XLOC_023103	ENSSSCG00000034623
ENSSSCG00000034623	Upregulated	200299	15	-	47104510	47198872	TCONS_00085127	17	1949	XLOC_023103	ENSSSCG00000034623
ENSSSCG00000034623	Upregulated	200300	15	+	47104571	47186451	TCONS_00079990	18	2125	XLOC_021643	ENSSSCG00000034623
ENSSSCG00000034623	Upregulated	200301	15	+	47104571	47187940	TCONS_00079991	19	2201	XLOC_021643	ENSSSCG00000034623
ENSSSCG00000034623	Upregulated	200302	15	+	47104571	47187940	TCONS_00079992	19	2181	XLOC_021643	ENSSSCG00000034623
ENSSSCG00000034623	Upregulated	200303	15	+	47104571	47187940	TCONS_00079993	20	2280	XLOC_021643	ENSSSCG00000034623
ENSSSCG00000034623	Upregulated	200304	15	+	47104571	47198952	TCONS_00079994	21	2439	XLOC_021643	ENSSSCG00000034623
ENSSSCG00000034623	Upregulated	200305	15	+	47104571	47198954	TCONS_00079995	21	2441	XLOC_021643	ENSSSCG00000034623
ENSSSCG00000034623	Upregulated	200306	15	+	47104571	47198954	TCONS_00079996	20	2362	XLOC_021643	ENSSSCG00000034623
ENSSSCG00000034623	Upregulated	200307	15	+	47104571	47198954	TCONS_00079997	21	2441	XLOC_021643	ENSSSCG00000034623
ENSSSCG00000034623	Upregulated	200308	15	+	47104571	47198954	TCONS_00079998	19	2216	XLOC_021643	ENSSSCG00000034623
ENSSSCG00000034623	Upregulated	200309	15	+	47104571	47198954	TCONS_00079999	20	2266	XLOC_021643	ENSSSCG00000034623
ENSSSCG00000034623	Upregulated	200310	15	+	47104571	47198954	TCONS_00080000	21	2441	XLOC_021643	ENSSSCG00000034623
ENSSSCG00000034623	Upregulated	200311	15	+	47104571	47198954	TCONS_00080001	19	2285	XLOC_021643	ENSSSCG00000034623
ENSSSCG00000034623	Upregulated	200312	15	-	47130851	47159070	TCONS_00085128	8	891	XLOC_023103	ENSSSCG00000034623
ENSSSCG00000021375	Upregulated	232416	X	-	108757821	109044695	TCONS_00237910	5	2777	XLOC_065832	HS6ST2	heparan sulfate 6-O-sulfotransferase 2 [Source:HGNC Symbol;Acc:HGNC:19133]
ENSSSCG00000021375	Upregulated	232417	X	-	108757821	109044695	TCONS_00237911	3	2657	XLOC_065832	HS6ST2	heparan sulfate 6-O-sulfotransferase 2 [Source:HGNC Symbol;Acc:HGNC:19133]
ENSSSCG00000049476	Upregulated	74051	5	+	10374707	10412643	TCONS_00157491	3	824	XLOC_042715	ENSSSCG00000049476
ENSSSCG00000049476	Upregulated	74052	5	+	10374707	10426998	TCONS_00157492	2	1007	XLOC_042715	ENSSSCG00000049476
ENSSSCG00000049476	Upregulated	74053	5	+	10374707	10426998	TCONS_00157493	3	1200	XLOC_042715	ENSSSCG00000049476
ENSSSCG00000049476	Upregulated	74055	5	+	10417337	10429478	TCONS_00157494	2	2904	XLOC_042715	ENSSSCG00000049476
ENSSSCG00000005369	Upregulated	18168	1	+	239727855	239728976	TCONS_00008942	1	1122	XLOC_002528	FOXE1	forkhead box E1 [Source:VGNC Symbol;Acc:VGNC:88202]
ENSSSCG00000045787	Upregulated	229452	X	+	56310888	56313401	TCONS_00232496	8	650	XLOC_064264	ENSSSCG00000045787
ENSSSCG00000044923	Upregulated	26078	2	+	13034861	13055718	TCONS_00108649	3	3517	XLOC_029842	ENSSSCG00000044923
ENSSSCG00000044923	Upregulated	26079	2	+	13034861	13058603	TCONS_00108650	3	6402	XLOC_029842	ENSSSCG00000044923
ENSSSCG00000044923	Upregulated	26080	2	+	13045847	13058603	TCONS_00108651	2	6268	XLOC_029842	ENSSSCG00000044923
ENSSSCG00000037935	Upregulated	180711	13	-	189794417	189962530	TCONS_00062790	2	112	XLOC_017238	CYYR1	cysteine and tyrosine rich 1 [Source:VGNC Symbol;Acc:VGNC:87139]
ENSSSCG00000037935	Upregulated	180715	13	-	189957606	190003554	TCONS_00062792	3	3138	XLOC_017247	CYYR1	cysteine and tyrosine rich 1 [Source:VGNC Symbol;Acc:VGNC:87139]
ENSSSCG00000037935	Upregulated	180716	13	-	189957606	190066539	TCONS_00062793	4	3579	XLOC_017247	CYYR1	cysteine and tyrosine rich 1 [Source:VGNC Symbol;Acc:VGNC:87139]
ENSSSCG00000037935	Upregulated	180717	13	+	189959270	189960055	TCONS_00054047	1	786	XLOC_014947	CYYR1	cysteine and tyrosine rich 1 [Source:VGNC Symbol;Acc:VGNC:87139]
ENSSSCG00000037935	Upregulated	180718	13	-	189970498	190066539	TCONS_00062794	4	721	XLOC_017247	CYYR1	cysteine and tyrosine rich 1 [Source:VGNC Symbol;Acc:VGNC:87139]
ENSSSCG00000017583	Upregulated	159498	12	+	26356773	26367864	TCONS_00037486	8	1188	XLOC_010778	SGCA	sarcoglycan alpha [Source:VGNC Symbol;Acc:VGNC:92788]
ENSSSCG00000017583	Upregulated	159499	12	+	26356781	26371564	TCONS_00037487	10	4248	XLOC_010778	SGCA	sarcoglycan alpha [Source:VGNC Symbol;Acc:VGNC:92788]
ENSSSCG00000017583	Upregulated	159500	12	+	26357691	26371601	TCONS_00037488	11	3485	XLOC_010778	SGCA	sarcoglycan alpha [Source:VGNC Symbol;Acc:VGNC:92788]
ENSSSCG00000017583	Upregulated	159501	12	+	26357691	26371605	TCONS_00037489	10	3396	XLOC_010778	SGCA	sarcoglycan alpha [Source:VGNC Symbol;Acc:VGNC:92788]
ENSSSCG00000017583	Upregulated	159503	12	+	26365388	26375930	TCONS_00037490	2	1731	XLOC_010778	SGCA	sarcoglycan alpha [Source:VGNC Symbol;Acc:VGNC:92788]
ENSSSCG00000017583	Upregulated	159504	12	-	26365395	26376179	TCONS_00043458	2	1973	XLOC_012246	SGCA	sarcoglycan alpha [Source:VGNC Symbol;Acc:VGNC:92788]
ENSSSCG00000017583	Upregulated	159505	12	+	26366312	26371605	TCONS_00037491	2	910	XLOC_010778	SGCA	sarcoglycan alpha [Source:VGNC Symbol;Acc:VGNC:92788]
ENSSSCG00000006846	Upregulated	70210	4	+	111364451	111382420	TCONS_00148846	9	1550	XLOC_040383	HENMT1	HEN methyltransferase 1 [Source:VGNC Symbol;Acc:VGNC:88844]
ENSSSCG00000006846	Upregulated	70212	4	-	111377630	111382099	TCONS_00155544	3	303	XLOC_042157	HENMT1	HEN methyltransferase 1 [Source:VGNC Symbol;Acc:VGNC:88844]
ENSSSCG00000042227	Upregulated	192467	14	+	81309858	81314288	TCONS_00068667	2	3291	XLOC_018742	ENSSSCG00000042227
ENSSSCG00000042227	Upregulated	192468	14	+	81309858	81314288	TCONS_00068668	2	3536	XLOC_018742	ENSSSCG00000042227
ENSSSCG00000036647	Upregulated	229176	X	-	49976946	49981084	TCONS_00236272	1	4139	XLOC_065367	SPIN4	spindlin family member 4 [Source:VGNC Symbol;Acc:VGNC:93408]
ENSSSCG00000036647	Upregulated	229177	X	+	49978806	49980734	TCONS_00232335	1	1929	XLOC_064211	SPIN4	spindlin family member 4 [Source:VGNC Symbol;Acc:VGNC:93408]
ENSSSCG00000021675	Upregulated	31140	2	-	64544366	64569334	TCONS_00120958	14	3566	XLOC_033059	ENSSSCG00000021675
ENSSSCG00000021675	Upregulated	31141	2	-	64544366	64571618	TCONS_00120959	15	5777	XLOC_033059	ENSSSCG00000021675
ENSSSCG00000021675	Upregulated	31142	2	-	64544366	64571618	TCONS_00120960	14	5847	XLOC_033059	ENSSSCG00000021675
ENSSSCG00000021675	Upregulated	31143	2	-	64544366	64571618	TCONS_00120961	14	6337	XLOC_033059	ENSSSCG00000021675
ENSSSCG00000021675	Upregulated	31144	2	-	64544366	64571618	TCONS_00120962	14	6337	XLOC_033059	ENSSSCG00000021675
ENSSSCG00000021675	Upregulated	31145	2	-	64544366	64571618	TCONS_00120963	14	6346	XLOC_033059	ENSSSCG00000021675
ENSSSCG00000021675	Upregulated	31146	2	-	64544366	64571692	TCONS_00120964	14	5933	XLOC_033059	ENSSSCG00000021675
ENSSSCG00000021675	Upregulated	31147	2	-	64544366	64571725	TCONS_00120965	15	5861	XLOC_033059	ENSSSCG00000021675
ENSSSCG00000021675	Upregulated	31148	2	-	64544366	64571725	TCONS_00120966	14	5957	XLOC_033059	ENSSSCG00000021675
ENSSSCG00000021675	Upregulated	31149	2	-	64544366	64606932	TCONS_00120967	25	9262	XLOC_033059	ENSSSCG00000021675
ENSSSCG00000021675	Upregulated	31150	2	-	64563473	64571618	TCONS_00120968	5	2854	XLOC_033059	ENSSSCG00000021675
ENSSSCG00000010617	Upregulated	195786	14	+	115587215	116198111	TCONS_00070320	27	6023	XLOC_019141	SORCS3	sortilin related VPS10 domain containing receptor 3 [Source:VGNC Symbol;Acc:VGNC:93341]
ENSSSCG00000010617	Upregulated	195787	14	+	115587215	116198111	TCONS_00070321	29	6283	XLOC_019141	SORCS3	sortilin related VPS10 domain containing receptor 3 [Source:VGNC Symbol;Acc:VGNC:93341]
ENSSSCG00000010617	Upregulated	195788	14	+	115587215	116198111	TCONS_00070322	29	6283	XLOC_019141	SORCS3	sortilin related VPS10 domain containing receptor 3 [Source:VGNC Symbol;Acc:VGNC:93341]
ENSSSCG00000010617	Upregulated	195789	14	+	115587215	116198111	TCONS_00070323	28	6184	XLOC_019141	SORCS3	sortilin related VPS10 domain containing receptor 3 [Source:VGNC Symbol;Acc:VGNC:93341]
ENSSSCG00000010617	Upregulated	195790	14	+	115587821	116198106	TCONS_00070324	26	5434	XLOC_019141	SORCS3	sortilin related VPS10 domain containing receptor 3 [Source:VGNC Symbol;Acc:VGNC:93341]
ENSSSCG00000010617	Upregulated	195791	14	-	116159748	116178670	TCONS_00077808	5	696	XLOC_020979	SORCS3	sortilin related VPS10 domain containing receptor 3 [Source:VGNC Symbol;Acc:VGNC:93341]
ENSSSCG00000010617	Upregulated	195792	14	-	116196154	116196636	TCONS_00077809	1	483	XLOC_020980	SORCS3	sortilin related VPS10 domain containing receptor 3 [Source:VGNC Symbol;Acc:VGNC:93341]
ENSSSCG00000010617	Upregulated	195793	14	-	116196850	116197244	TCONS_00077810	1	395	XLOC_020981	SORCS3	sortilin related VPS10 domain containing receptor 3 [Source:VGNC Symbol;Acc:VGNC:93341]
ENSSSCG00000048159	Upregulated	113199	7	+	54981795	54994132	TCONS_00193885	3	2622	XLOC_052356	ENSSSCG00000048159
ENSSSCG00000048159	Upregulated	113200	7	+	54981795	54994132	TCONS_00193886	2	5096	XLOC_052356	ENSSSCG00000048159
ENSSSCG00000048159	Upregulated	113201	7	+	54981795	55008822	TCONS_00193887	3	5819	XLOC_052356	ENSSSCG00000048159
ENSSSCG00000048159	Upregulated	113202	7	+	54981795	55008822	TCONS_00193888	4	5877	XLOC_052356	ENSSSCG00000048159
ENSSSCG00000048159	Upregulated	113203	7	+	54981795	55008822	TCONS_00193889	3	3174	XLOC_052356	ENSSSCG00000048159
ENSSSCG00000048159	Upregulated	113206	7	+	54982611	55006921	TCONS_00193890	3	3102	XLOC_052356	ENSSSCG00000048159
ENSSSCG00000048159	Upregulated	113207	7	+	54982617	55004617	TCONS_00193891	4	850	XLOC_052356	ENSSSCG00000048159
ENSSSCG00000001939	Upregulated	114320	7	-	62228449	62280102	TCONS_00201422	11	1782	XLOC_054393	TTC6	tetratricopeptide repeat domain 6 [Source:VGNC Symbol;Acc:VGNC:94556]
ENSSSCG00000001939	Upregulated	114321	7	-	62228449	62393388	TCONS_00201423	31	4892	XLOC_054393	TTC6	tetratricopeptide repeat domain 6 [Source:VGNC Symbol;Acc:VGNC:94556]
ENSSSCG00000001939	Upregulated	114322	7	-	62228449	62443707	TCONS_00201424	29	5529	XLOC_054393	TTC6	tetratricopeptide repeat domain 6 [Source:VGNC Symbol;Acc:VGNC:94556]
ENSSSCG00000001939	Upregulated	114323	7	-	62228449	62443707	TCONS_00201425	31	5817	XLOC_054393	TTC6	tetratricopeptide repeat domain 6 [Source:VGNC Symbol;Acc:VGNC:94556]
ENSSSCG00000001939	Upregulated	114324	7	-	62336666	62443707	TCONS_00201426	7	1756	XLOC_054393	TTC6	tetratricopeptide repeat domain 6 [Source:VGNC Symbol;Acc:VGNC:94556]
ENSSSCG00000001939	Upregulated	114325	7	+	62362969	62393366	TCONS_00194438	5	618	XLOC_052494	TTC6	tetratricopeptide repeat domain 6 [Source:VGNC Symbol;Acc:VGNC:94556]
ENSSSCG00000031813	Upregulated	64136	4	-	76062403	76382818	TCONS_00152501	4	7016	XLOC_041450	XKR4	XK related 4 [Source:VGNC Symbol;Acc:VGNC:98900]
ENSSSCG00000031813	Upregulated	64137	4	+	76065296	76065637	TCONS_00145831	1	342	XLOC_039664	XKR4	XK related 4 [Source:VGNC Symbol;Acc:VGNC:98900]
ENSSSCG00000031813	Upregulated	64138	4	+	76066083	76066991	TCONS_00145832	1	909	XLOC_039665	XKR4	XK related 4 [Source:VGNC Symbol;Acc:VGNC:98900]
ENSSSCG00000034253	Upregulated	116293	7	-	80570597	80570975	TCONS_00202418	2	216	XLOC_054684	ENSSSCG00000034253
ENSSSCG00000034253	Upregulated	116294	7	+	80570711	80571084	TCONS_00195412	1	374	XLOC_052752	ENSSSCG00000034253
ENSSSCG00000035772	Upregulated	87114	6	+	27108600	27142180	TCONS_00170016	12	3971	XLOC_046178	CDH5	cadherin 5 [Source:VGNC Symbol;Acc:VGNC:86486]
ENSSSCG00000035772	Upregulated	87115	6	+	27108609	27142171	TCONS_00170017	12	3920	XLOC_046178	CDH5	cadherin 5 [Source:VGNC Symbol;Acc:VGNC:86486]
ENSSSCG00000035772	Upregulated	87116	6	+	27108609	27142180	TCONS_00170018	13	3807	XLOC_046178	CDH5	cadherin 5 [Source:VGNC Symbol;Acc:VGNC:86486]
ENSSSCG00000035772	Upregulated	87117	6	+	27118058	27141994	TCONS_00170019	13	3818	XLOC_046178	CDH5	cadherin 5 [Source:VGNC Symbol;Acc:VGNC:86486]
ENSSSCG00000035772	Upregulated	87118	6	+	27118058	27142180	TCONS_00170020	14	3882	XLOC_046178	CDH5	cadherin 5 [Source:VGNC Symbol;Acc:VGNC:86486]
ENSSSCG00000035772	Upregulated	87119	6	+	27118080	27142180	TCONS_00170021	13	3962	XLOC_046178	CDH5	cadherin 5 [Source:VGNC Symbol;Acc:VGNC:86486]
ENSSSCG00000035772	Upregulated	87120	6	-	27119994	27130446	TCONS_00180777	6	972	XLOC_048955	CDH5	cadherin 5 [Source:VGNC Symbol;Acc:VGNC:86486]
ENSSSCG00000035772	Upregulated	87121	6	-	27140437	27141937	TCONS_00180778	1	1501	XLOC_048956	CDH5	cadherin 5 [Source:VGNC Symbol;Acc:VGNC:86486]
ENSSSCG00000048443	Upregulated	232115	X	-	106236748	106246378	TCONS_00237760	3	2995	XLOC_065793	APLN	apelin [Source:HGNC Symbol;Acc:HGNC:16665]
ENSSSCG00000013093	Upregulated	25715	2	+	10206012	10226827	TCONS_00108488	15	2460	XLOC_029778	VWCE	von Willebrand factor C and EGF domains [Source:VGNC Symbol;Acc:VGNC:94888]
ENSSSCG00000013093	Upregulated	25716	2	+	10206012	10240175	TCONS_00108489	22	5096	XLOC_029778	VWCE	von Willebrand factor C and EGF domains [Source:VGNC Symbol;Acc:VGNC:94888]
ENSSSCG00000013093	Upregulated	25717	2	+	10206012	10240175	TCONS_00108490	21	5013	XLOC_029778	VWCE	von Willebrand factor C and EGF domains [Source:VGNC Symbol;Acc:VGNC:94888]
ENSSSCG00000013093	Upregulated	25718	2	+	10206012	10240175	TCONS_00108491	21	5022	XLOC_029778	VWCE	von Willebrand factor C and EGF domains [Source:VGNC Symbol;Acc:VGNC:94888]
ENSSSCG00000013093	Upregulated	25719	2	+	10206012	10240175	TCONS_00108492	21	5037	XLOC_029778	VWCE	von Willebrand factor C and EGF domains [Source:VGNC Symbol;Acc:VGNC:94888]
ENSSSCG00000013093	Upregulated	25720	2	+	10206012	10244248	TCONS_00108493	20	2518	XLOC_029778	VWCE	von Willebrand factor C and EGF domains [Source:VGNC Symbol;Acc:VGNC:94888]
ENSSSCG00000011724	Upregulated	174870	13	+	95880137	95903811	TCONS_00051121	11	2487	XLOC_014087	ENSSSCG00000011724
ENSSSCG00000004503	Upregulated	6721	1	-	96079709	96276992	TCONS_00014353	36	7055	XLOC_004106	LOXHD1	lipoxygenase homology domains 1 [Source:VGNC Symbol;Acc:VGNC:89779]
ENSSSCG00000004503	Upregulated	6722	1	-	96079709	96276992	TCONS_00014354	40	7452	XLOC_004106	LOXHD1	lipoxygenase homology domains 1 [Source:VGNC Symbol;Acc:VGNC:89779]
ENSSSCG00000004503	Upregulated	6723	1	-	96079709	96276992	TCONS_00014355	39	7894	XLOC_004106	LOXHD1	lipoxygenase homology domains 1 [Source:VGNC Symbol;Acc:VGNC:89779]
ENSSSCG00000004503	Upregulated	6724	1	-	96079709	96276992	TCONS_00014356	40	8335	XLOC_004106	LOXHD1	lipoxygenase homology domains 1 [Source:VGNC Symbol;Acc:VGNC:89779]
ENSSSCG00000004503	Upregulated	6725	1	-	96079709	96276992	TCONS_00014357	41	8521	XLOC_004106	LOXHD1	lipoxygenase homology domains 1 [Source:VGNC Symbol;Acc:VGNC:89779]
ENSSSCG00000004503	Upregulated	6726	1	-	96081095	96166191	TCONS_00014358	22	3351	XLOC_004106	LOXHD1	lipoxygenase homology domains 1 [Source:VGNC Symbol;Acc:VGNC:89779]
ENSSSCG00000051284	Upregulated	151492	11	+	48231714	48571269	TCONS_00030606	7	685	XLOC_008829	ENSSSCG00000051284
ENSSSCG00000051284	Upregulated	151499	11	+	48416370	48561434	TCONS_00030609	3	2106	XLOC_008829	ENSSSCG00000051284
ENSSSCG00000051284	Upregulated	151519	11	+	48462465	48629399	TCONS_00030618	3	3216	XLOC_008840	ENSSSCG00000051284
ENSSSCG00000051284	Upregulated	151520	11	+	48484244	48493079	TCONS_00030619	2	5738	XLOC_008841	ENSSSCG00000051284
ENSSSCG00000012384	Upregulated	229411	X	-	56103401	56114671	TCONS_00236373	7	960	XLOC_065414	AWAT2	acyl-CoA wax alcohol acyltransferase 2 [Source:VGNC Symbol;Acc:VGNC:85705]
ENSSSCG00000012384	Upregulated	229412	X	+	56103841	56114755	TCONS_00232469	7	1644	XLOC_064257	AWAT2	acyl-CoA wax alcohol acyltransferase 2 [Source:VGNC Symbol;Acc:VGNC:85705]
ENSSSCG00000012384	Upregulated	229413	X	+	56103871	56114755	TCONS_00232470	8	1384	XLOC_064257	AWAT2	acyl-CoA wax alcohol acyltransferase 2 [Source:VGNC Symbol;Acc:VGNC:85705]
ENSSSCG00000012384	Upregulated	229414	X	+	56103912	56107092	TCONS_00232471	5	1315	XLOC_064257	AWAT2	acyl-CoA wax alcohol acyltransferase 2 [Source:VGNC Symbol;Acc:VGNC:85705]
ENSSSCG00000012384	Upregulated	229415	X	+	56103912	56114755	TCONS_00232472	7	1711	XLOC_064257	AWAT2	acyl-CoA wax alcohol acyltransferase 2 [Source:VGNC Symbol;Acc:VGNC:85705]
ENSSSCG00000012384	Upregulated	229416	X	-	56104545	56114671	TCONS_00236374	7	994	XLOC_065414	AWAT2	acyl-CoA wax alcohol acyltransferase 2 [Source:VGNC Symbol;Acc:VGNC:85705]
ENSSSCG00000008564	Upregulated	56585	3	+	112407075	112457103	TCONS_00133714	7	694	XLOC_036378	CIB4	calcium and integrin binding family member 4 [Source:VGNC Symbol;Acc:VGNC:86697]
ENSSSCG00000017433	Upregulated	158073	12	+	21014283	21021924	TCONS_00036741	8	1389	XLOC_010550	ENSSSCG00000017433
ENSSSCG00000044427	Upregulated	33708	2	+	74026291	74027994	TCONS_00112427	2	1349	XLOC_030822	ENSSSCG00000044427
ENSSSCG00000044427	Upregulated	33710	2	-	74027442	74027818	TCONS_00122215	1	377	XLOC_033357	ENSSSCG00000044427
ENSSSCG00000041353	Upregulated	213413	17	-	3312716	3426202	TCONS_00097967	7	1045	XLOC_026899	ENSSSCG00000041353
ENSSSCG00000041353	Upregulated	213414	17	-	3312716	3492035	TCONS_00097968	8	1099	XLOC_026899	ENSSSCG00000041353
ENSSSCG00000041353	Upregulated	213415	17	-	3312716	3492291	TCONS_00097969	9	1159	XLOC_026899	ENSSSCG00000041353
ENSSSCG00000041353	Upregulated	213416	17	-	3312716	3498745	TCONS_00097970	10	1236	XLOC_026899	ENSSSCG00000041353
ENSSSCG00000041353	Upregulated	213417	17	-	3312716	3498997	TCONS_00097971	8	1145	XLOC_026899	ENSSSCG00000041353
ENSSSCG00000041353	Upregulated	213418	17	-	3312716	3505380	TCONS_00097972	11	1294	XLOC_026899	ENSSSCG00000041353
ENSSSCG00000041353	Upregulated	213419	17	-	3312716	3505735	TCONS_00097973	10	1583	XLOC_026899	ENSSSCG00000041353
ENSSSCG00000041353	Upregulated	213420	17	-	3312716	3506226	TCONS_00097974	10	2077	XLOC_026899	ENSSSCG00000041353
ENSSSCG00000041353	Upregulated	213421	17	-	3312716	3624440	TCONS_00097975	11	1694	XLOC_026899	ENSSSCG00000041353
ENSSSCG00000041353	Upregulated	213427	17	-	3342148	3502558	TCONS_00097976	3	224	XLOC_026900	ENSSSCG00000041353
ENSSSCG00000041353	Upregulated	213429	17	-	3356389	3359584	TCONS_00097977	2	3069	XLOC_026901	ENSSSCG00000041353
ENSSSCG00000009051	Upregulated	125757	8	-	85667287	85740911	TCONS_00211901	8	1849	XLOC_057428	IL15	interleukin 15 [Source:VGNC Symbol;Acc:VGNC:89083]
ENSSSCG00000009051	Upregulated	125758	8	-	85667287	85747540	TCONS_00211902	7	1696	XLOC_057428	IL15	interleukin 15 [Source:VGNC Symbol;Acc:VGNC:89083]
ENSSSCG00000009051	Upregulated	125759	8	-	85667307	85677502	TCONS_00211903	6	1608	XLOC_057428	IL15	interleukin 15 [Source:VGNC Symbol;Acc:VGNC:89083]
ENSSSCG00000009051	Upregulated	125760	8	-	85667307	85677837	TCONS_00211904	6	1524	XLOC_057428	IL15	interleukin 15 [Source:VGNC Symbol;Acc:VGNC:89083]
ENSSSCG00000009051	Upregulated	125761	8	+	85667386	85740402	TCONS_00207157	7	1655	XLOC_056059	IL15	interleukin 15 [Source:VGNC Symbol;Acc:VGNC:89083]
ENSSSCG00000009051	Upregulated	125762	8	+	85667386	85740879	TCONS_00207158	7	1638	XLOC_056059	IL15	interleukin 15 [Source:VGNC Symbol;Acc:VGNC:89083]
ENSSSCG00000009051	Upregulated	125763	8	-	85667543	85740911	TCONS_00211905	9	2363	XLOC_057428	IL15	interleukin 15 [Source:VGNC Symbol;Acc:VGNC:89083]
ENSSSCG00000009051	Upregulated	125764	8	+	85707341	85707663	TCONS_00207159	1	323	XLOC_056060	IL15	interleukin 15 [Source:VGNC Symbol;Acc:VGNC:89083]
ENSSSCG00000042352	Upregulated	131886	9	+	27113509	27373611	TCONS_00215000	3	1486	XLOC_058394	ENSSSCG00000042352
ENSSSCG00000042352	Upregulated	131949	9	-	27335657	27377684	TCONS_00221178	2	1087	XLOC_060134	ENSSSCG00000042352
ENSSSCG00000042352	Upregulated	131950	9	+	27349101	27369954	TCONS_00215025	4	898	XLOC_058411	ENSSSCG00000042352
ENSSSCG00000042352	Upregulated	131951	9	+	27349101	27369954	TCONS_00215026	3	666	XLOC_058411	ENSSSCG00000042352
ENSSSCG00000042352	Upregulated	131952	9	+	27349101	27371757	TCONS_00215027	4	1105	XLOC_058411	ENSSSCG00000042352
ENSSSCG00000042352	Upregulated	131953	9	+	27349101	27371757	TCONS_00215028	5	1288	XLOC_058411	ENSSSCG00000042352
ENSSSCG00000042352	Upregulated	131954	9	-	27349212	27363904	TCONS_00221179	3	2146	XLOC_060135	ENSSSCG00000042352
ENSSSCG00000042352	Upregulated	131955	9	-	27349212	27363968	TCONS_00221180	2	3292	XLOC_060135	ENSSSCG00000042352
ENSSSCG00000042352	Upregulated	131956	9	-	27349212	27371320	TCONS_00221181	4	557	XLOC_060135	ENSSSCG00000042352
ENSSSCG00000042352	Upregulated	131957	9	-	27364161	27371265	TCONS_00221182	4	1052	XLOC_060135	ENSSSCG00000042352
ENSSSCG00000048223	Upregulated	36201	2	+	82688040	82691427	TCONS_00113634	2	2333	XLOC_031057	ENSSSCG00000048223
ENSSSCG00000048223	Upregulated	36202	2	+	82688040	82698185	TCONS_00113635	3	456	XLOC_031057	ENSSSCG00000048223
ENSSSCG00000007439	Upregulated	218666	17	-	48339557	48347441	TCONS_00100548	3	1780	XLOC_027585	CDH22	cadherin 22 [Source:VGNC Symbol;Acc:VGNC:95579]
ENSSSCG00000007439	Upregulated	218667	17	-	48339557	48352121	TCONS_00100549	5	1918	XLOC_027585	CDH22	cadherin 22 [Source:VGNC Symbol;Acc:VGNC:95579]
ENSSSCG00000007439	Upregulated	218668	17	-	48339557	48413683	TCONS_00100550	11	3415	XLOC_027585	CDH22	cadherin 22 [Source:VGNC Symbol;Acc:VGNC:95579]
ENSSSCG00000007439	Upregulated	218669	17	-	48339557	48413683	TCONS_00100551	11	3399	XLOC_027585	CDH22	cadherin 22 [Source:VGNC Symbol;Acc:VGNC:95579]
ENSSSCG00000007439	Upregulated	218670	17	-	48339557	48413683	TCONS_00100552	11	3416	XLOC_027585	CDH22	cadherin 22 [Source:VGNC Symbol;Acc:VGNC:95579]
ENSSSCG00000007439	Upregulated	218671	17	-	48339557	48413683	TCONS_00100553	11	3394	XLOC_027585	CDH22	cadherin 22 [Source:VGNC Symbol;Acc:VGNC:95579]
ENSSSCG00000007439	Upregulated	218672	17	-	48339557	48413683	TCONS_00100554	11	3416	XLOC_027585	CDH22	cadherin 22 [Source:VGNC Symbol;Acc:VGNC:95579]
ENSSSCG00000007439	Upregulated	218673	17	+	48339561	48340440	TCONS_00096900	1	880	XLOC_026574	CDH22	cadherin 22 [Source:VGNC Symbol;Acc:VGNC:95579]
ENSSSCG00000007439	Upregulated	218674	17	-	48339694	48413683	TCONS_00100555	11	3279	XLOC_027585	CDH22	cadherin 22 [Source:VGNC Symbol;Acc:VGNC:95579]
ENSSSCG00000007439	Upregulated	218675	17	-	48339694	48413683	TCONS_00100556	10	3387	XLOC_027585	CDH22	cadherin 22 [Source:VGNC Symbol;Acc:VGNC:95579]
ENSSSCG00000007439	Upregulated	218676	17	+	48340819	48351189	TCONS_00096901	3	426	XLOC_026575	CDH22	cadherin 22 [Source:VGNC Symbol;Acc:VGNC:95579]
ENSSSCG00000048235	Upregulated	25743	2	-	10452826	10461288	TCONS_00118192	9	1291	XLOC_032281	ENSSSCG00000048235
ENSSSCG00000009649	Upregulated	184048	14	-	8990750	8997300	TCONS_00071967	5	4469	XLOC_019586	NEFL	neurofilament light [Source:VGNC Symbol;Acc:VGNC:90670]
ENSSSCG00000009649	Upregulated	184049	14	-	8990750	8997300	TCONS_00071968	4	4523	XLOC_019586	NEFL	neurofilament light [Source:VGNC Symbol;Acc:VGNC:90670]
ENSSSCG00000009649	Upregulated	184050	14	-	8990750	8997300	TCONS_00071969	4	5084	XLOC_019586	NEFL	neurofilament light [Source:VGNC Symbol;Acc:VGNC:90670]
ENSSSCG00000009649	Upregulated	184051	14	-	8991326	8997112	TCONS_00071970	4	3759	XLOC_019586	NEFL	neurofilament light [Source:VGNC Symbol;Acc:VGNC:90670]
ENSSSCG00000009649	Upregulated	184052	14	+	8991383	8996210	TCONS_00064437	4	2800	XLOC_017758	NEFL	neurofilament light [Source:VGNC Symbol;Acc:VGNC:90670]
ENSSSCG00000001616	Upregulated	110810	7	-	36481579	36493906	TCONS_00199697	7	2484	XLOC_053984	TREML2	triggering receptor expressed on myeloid cells like 2 [Source:VGNC Symbol;Acc:VGNC:94386]
ENSSSCG00000001616	Upregulated	110811	7	-	36481944	36490269	TCONS_00199698	5	1992	XLOC_053984	TREML2	triggering receptor expressed on myeloid cells like 2 [Source:VGNC Symbol;Acc:VGNC:94386]
ENSSSCG00000001616	Upregulated	110812	7	-	36482058	36493906	TCONS_00199699	6	2267	XLOC_053984	TREML2	triggering receptor expressed on myeloid cells like 2 [Source:VGNC Symbol;Acc:VGNC:94386]
ENSSSCG00000001616	Upregulated	110813	7	+	36482301	36531759	TCONS_00192656	5	2322	XLOC_052054	TREML2	triggering receptor expressed on myeloid cells like 2 [Source:VGNC Symbol;Acc:VGNC:94386]
ENSSSCG00000042617	Upregulated	137275	9	+	88739064	88742446	TCONS_00217701	2	3214	XLOC_059079	ENSSSCG00000042617
ENSSSCG00000047465	Upregulated	231381	X	+	91498608	91548871	TCONS_00233450	4	5029	XLOC_064556	SERTM2	serine rich and transmembrane domain containing 2 [Source:NCBI gene (formerly Entrezgene);Acc:106507011]
ENSSSCG00000047465	Upregulated	231383	X	+	91536230	91548871	TCONS_00233452	4	5200	XLOC_064556	SERTM2	serine rich and transmembrane domain containing 2 [Source:NCBI gene (formerly Entrezgene);Acc:106507011]
ENSSSCG00000047465	Upregulated	231384	X	+	91537899	91548871	TCONS_00233453	3	5080	XLOC_064556	SERTM2	serine rich and transmembrane domain containing 2 [Source:NCBI gene (formerly Entrezgene);Acc:106507011]
ENSSSCG00000013095	Upregulated	25736	2	-	10379084	10386868	TCONS_00118186	8	1253	XLOC_032279	PAG6	pregnancy-associated glycoprotein 6 [Source:NCBI gene (formerly Entrezgene);Acc:396749]
ENSSSCG00000013095	Upregulated	25737	2	-	10379084	10386868	TCONS_00118187	8	1253	XLOC_032279	PAG6	pregnancy-associated glycoprotein 6 [Source:NCBI gene (formerly Entrezgene);Acc:396749]
ENSSSCG00000016131	Upregulated	204895	15	+	109637668	109886299	TCONS_00082250	26	6476	XLOC_022239	ADAM23	ADAM metallopeptidase domain 23 [Source:VGNC Symbol;Acc:VGNC:95933]
ENSSSCG00000016131	Upregulated	204911	15	+	109695273	109886151	TCONS_00082261	26	6442	XLOC_022239	ADAM23	ADAM metallopeptidase domain 23 [Source:VGNC Symbol;Acc:VGNC:95933]
ENSSSCG00000016131	Upregulated	204912	15	+	109695273	109886299	TCONS_00082262	25	6499	XLOC_022239	ADAM23	ADAM metallopeptidase domain 23 [Source:VGNC Symbol;Acc:VGNC:95933]
ENSSSCG00000016131	Upregulated	204913	15	+	109695273	109886299	TCONS_00082263	25	6499	XLOC_022239	ADAM23	ADAM metallopeptidase domain 23 [Source:VGNC Symbol;Acc:VGNC:95933]
ENSSSCG00000016131	Upregulated	204914	15	+	109695282	109886154	TCONS_00082264	26	6436	XLOC_022239	ADAM23	ADAM metallopeptidase domain 23 [Source:VGNC Symbol;Acc:VGNC:95933]
ENSSSCG00000016131	Upregulated	204915	15	-	109695760	109886098	TCONS_00087454	25	5811	XLOC_023686	ADAM23	ADAM metallopeptidase domain 23 [Source:VGNC Symbol;Acc:VGNC:95933]
ENSSSCG00000016131	Upregulated	204916	15	-	109831761	109886028	TCONS_00087455	15	4860	XLOC_023686	ADAM23	ADAM metallopeptidase domain 23 [Source:VGNC Symbol;Acc:VGNC:95933]
ENSSSCG00000016131	Upregulated	204917	15	-	109881117	109886028	TCONS_00087456	1	4912	XLOC_023686	ADAM23	ADAM metallopeptidase domain 23 [Source:VGNC Symbol;Acc:VGNC:95933]
ENSSSCG00000016131	Upregulated	204918	15	-	109881117	109886028	TCONS_00087457	2	4595	XLOC_023686	ADAM23	ADAM metallopeptidase domain 23 [Source:VGNC Symbol;Acc:VGNC:95933]
ENSSSCG00000041926	Upregulated	154694	12	-	4061157	4072575	TCONS_00041146	5	2354	XLOC_011632	ENSSSCG00000041926
ENSSSCG00000041926	Upregulated	154695	12	+	4061229	4069368	TCONS_00034999	3	540	XLOC_010206	ENSSSCG00000041926
ENSSSCG00000041926	Upregulated	154696	12	+	4061255	4069368	TCONS_00035000	2	432	XLOC_010206	ENSSSCG00000041926
ENSSSCG00000041926	Upregulated	154697	12	-	4067688	4071636	TCONS_00041147	4	2775	XLOC_011632	ENSSSCG00000041926
ENSSSCG00000041926	Upregulated	154698	12	-	4067688	4072575	TCONS_00041148	5	3133	XLOC_011632	ENSSSCG00000041926
ENSSSCG00000041926	Upregulated	154699	12	-	4067688	4072575	TCONS_00041149	4	3505	XLOC_011632	ENSSSCG00000041926
ENSSSCG00000041926	Upregulated	154700	12	-	4068653	4072575	TCONS_00041150	4	2540	XLOC_011632	ENSSSCG00000041926
ENSSSCG00000051063	Upregulated	54200	3	-	87142257	87149760	TCONS_00140802	2	4417	XLOC_038160	ENSSSCG00000051063
ENSSSCG00000051063	Upregulated	54201	3	-	87142257	87231276	TCONS_00140803	3	4572	XLOC_038160	ENSSSCG00000051063
ENSSSCG00000014007	Upregulated	35232	2	+	78076080	78093808	TCONS_00113185	7	888	XLOC_030969	FLT4	fms related receptor tyrosine kinase 4 [Source:VGNC Symbol;Acc:VGNC:88164]
ENSSSCG00000014007	Upregulated	35233	2	+	78076080	78115137	TCONS_00113186	31	5662	XLOC_030969	FLT4	fms related receptor tyrosine kinase 4 [Source:VGNC Symbol;Acc:VGNC:88164]
ENSSSCG00000014007	Upregulated	35234	2	+	78076080	78115142	TCONS_00113187	31	5670	XLOC_030969	FLT4	fms related receptor tyrosine kinase 4 [Source:VGNC Symbol;Acc:VGNC:88164]
ENSSSCG00000014007	Upregulated	35235	2	+	78076080	78115142	TCONS_00113188	30	5498	XLOC_030969	FLT4	fms related receptor tyrosine kinase 4 [Source:VGNC Symbol;Acc:VGNC:88164]
ENSSSCG00000014007	Upregulated	35236	2	-	78108689	78115051	TCONS_00122979	4	2148	XLOC_033525	FLT4	fms related receptor tyrosine kinase 4 [Source:VGNC Symbol;Acc:VGNC:88164]
ENSSSCG00000014007	Upregulated	35237	2	-	78108689	78115051	TCONS_00122980	4	2148	XLOC_033525	FLT4	fms related receptor tyrosine kinase 4 [Source:VGNC Symbol;Acc:VGNC:88164]
ENSSSCG00000050433	Upregulated	192479	14	+	81405546	81413237	TCONS_00068675	4	1140	XLOC_018745	ENSSSCG00000050433
ENSSSCG00000043143	Upregulated	111526	7	-	39235497	39237189	TCONS_00200056	2	1562	XLOC_054050	ENSSSCG00000043143
ENSSSCG00000003762	Upregulated	101858	6	+	134362901	134462694	TCONS_00177334	17	3640	XLOC_047968	ADGRL4	adhesion G protein-coupled receptor L4 [Source:VGNC Symbol;Acc:VGNC:85138]
ENSSSCG00000003762	Upregulated	101859	6	+	134362901	134462694	TCONS_00177335	16	3490	XLOC_047968	ADGRL4	adhesion G protein-coupled receptor L4 [Source:VGNC Symbol;Acc:VGNC:85138]
ENSSSCG00000003762	Upregulated	101860	6	-	134414512	134423175	TCONS_00188180	3	324	XLOC_050747	ADGRL4	adhesion G protein-coupled receptor L4 [Source:VGNC Symbol;Acc:VGNC:85138]
ENSSSCG00000003762	Upregulated	101861	6	-	134424408	134430169	TCONS_00188181	3	439	XLOC_050748	ADGRL4	adhesion G protein-coupled receptor L4 [Source:VGNC Symbol;Acc:VGNC:85138]
ENSSSCG00000003762	Upregulated	101862	6	-	134460842	134461993	TCONS_00188182	2	780	XLOC_050749	ADGRL4	adhesion G protein-coupled receptor L4 [Source:VGNC Symbol;Acc:VGNC:85138]
ENSSSCG00000024103	Upregulated	153241	11	-	78662304	78677383	TCONS_00034213	7	1183	XLOC_009969	ENSSSCG00000024103
ENSSSCG00000036364	Upregulated	52357	3	+	69486079	69491595	TCONS_00131667	2	5116	XLOC_035787	EGR4	early growth response 4 [Source:VGNC Symbol;Acc:VGNC:87592]
ENSSSCG00000036364	Upregulated	52358	3	+	69486079	69491595	TCONS_00131668	2	5119	XLOC_035787	EGR4	early growth response 4 [Source:VGNC Symbol;Acc:VGNC:87592]
ENSSSCG00000049805	Upregulated	153355	11	-	78903428	78905513	TCONS_00034285	2	1706	XLOC_009983	ENSSSCG00000049805
ENSSSCG00000049805	Upregulated	153356	11	-	78903428	78905653	TCONS_00034286	2	1704	XLOC_009983	ENSSSCG00000049805
ENSSSCG00000049805	Upregulated	153357	11	-	78903428	78905969	TCONS_00034287	2	1800	XLOC_009983	ENSSSCG00000049805
ENSSSCG00000049805	Upregulated	153358	11	+	78903490	78906077	TCONS_00031533	2	1846	XLOC_009149	ENSSSCG00000049805
ENSSSCG00000049805	Upregulated	153359	11	+	78903490	78906077	TCONS_00031534	1	2588	XLOC_009149	ENSSSCG00000049805
ENSSSCG00000049805	Upregulated	153360	11	+	78903490	78906152	TCONS_00031535	2	1695	XLOC_009149	ENSSSCG00000049805
ENSSSCG00000049805	Upregulated	153361	11	-	78903646	78922370	TCONS_00034288	5	2535	XLOC_009983	ENSSSCG00000049805
ENSSSCG00000041993	Upregulated	189995	14	+	55011923	55050606	TCONS_00067458	4	2125	XLOC_018415	ENSSSCG00000041993
ENSSSCG00000041993	Upregulated	189996	14	+	55017130	55050606	TCONS_00067459	2	2647	XLOC_018415	ENSSSCG00000041993
ENSSSCG00000009301	Upregulated	148730	11	-	4425060	4428740	TCONS_00031927	2	3003	XLOC_009244	GPR12	G protein-coupled receptor 12 [Source:VGNC Symbol;Acc:VGNC:88598]
ENSSSCG00000023760	Upregulated	114316	7	+	61826015	61832830	TCONS_00194436	1	6816	XLOC_052492	CLEC14A	C-type lectin domain containing 14A [Source:VGNC Symbol;Acc:VGNC:86747]
ENSSSCG00000023760	Upregulated	114317	7	-	61826846	61828014	TCONS_00201420	1	1169	XLOC_054391	CLEC14A	C-type lectin domain containing 14A [Source:VGNC Symbol;Acc:VGNC:86747]
ENSSSCG00000034015	Upregulated	167290	13	-	23867478	23873589	TCONS_00056079	3	4901	XLOC_015515	XIRP1	xin actin binding repeat containing 1 [Source:NCBI gene (formerly Entrezgene);Acc:100134978]
ENSSSCG00000012153	Upregulated	226666	X	-	14244279	14308623	TCONS_00235006	3	4003	XLOC_065038	RAI2	retinoic acid induced 2 [Source:VGNC Symbol;Acc:VGNC:92069]
ENSSSCG00000012153	Upregulated	226667	X	-	14246779	14309143	TCONS_00235007	2	2213	XLOC_065038	RAI2	retinoic acid induced 2 [Source:VGNC Symbol;Acc:VGNC:92069]
ENSSSCG00000042020	Upregulated	226663	X	+	14226768	14227151	TCONS_00231098	1	384	XLOC_063857	ENSSSCG00000042020
ENSSSCG00000042020	Upregulated	226664	X	+	14226783	14231303	TCONS_00231099	2	3077	XLOC_063857	ENSSSCG00000042020
ENSSSCG00000038924	Upregulated	26964	2	-	18618271	18640668	TCONS_00118837	3	2078	XLOC_032453	ENSSSCG00000038924
ENSSSCG00000038924	Upregulated	26965	2	-	18618271	18641984	TCONS_00118838	3	500	XLOC_032453	ENSSSCG00000038924
ENSSSCG00000038924	Upregulated	26966	2	-	18618271	18726548	TCONS_00118839	4	891	XLOC_032453	ENSSSCG00000038924
ENSSSCG00000046683	Upregulated	72969	5	-	6284979	6292068	TCONS_00162954	3	2959	XLOC_044212	ENSSSCG00000046683
ENSSSCG00000046459	Upregulated	135940	9	-	67154103	67157127	TCONS_00223133	4	1013	XLOC_060689	ENSSSCG00000046459
ENSSSCG00000046459	Upregulated	135941	9	-	67154103	67157127	TCONS_00223134	3	2387	XLOC_060689	ENSSSCG00000046459
ENSSSCG00000046459	Upregulated	135942	9	-	67154976	67156602	TCONS_00223135	2	253	XLOC_060689	ENSSSCG00000046459
ENSSSCG00000049378	Upregulated	114156	7	+	60065034	60299471	TCONS_00194356	28	6675	XLOC_052480	ENSSSCG00000049378
ENSSSCG00000049378	Upregulated	114157	7	+	60065034	60299471	TCONS_00194357	28	6735	XLOC_052480	ENSSSCG00000049378
ENSSSCG00000049378	Upregulated	114158	7	+	60065036	60299471	TCONS_00194358	27	6595	XLOC_052480	ENSSSCG00000049378
ENSSSCG00000049378	Upregulated	114159	7	+	60065060	60299471	TCONS_00194359	29	5155	XLOC_052480	ENSSSCG00000049378
ENSSSCG00000049378	Upregulated	114160	7	+	60066762	60299471	TCONS_00194360	28	4886	XLOC_052480	ENSSSCG00000049378
ENSSSCG00000049378	Upregulated	114162	7	+	60066787	60299471	TCONS_00194362	29	4955	XLOC_052480	ENSSSCG00000049378
ENSSSCG00000049378	Upregulated	114165	7	+	60066801	60299471	TCONS_00194364	26	4637	XLOC_052480	ENSSSCG00000049378
ENSSSCG00000049378	Upregulated	114166	7	+	60066811	60299471	TCONS_00194365	28	4946	XLOC_052480	ENSSSCG00000049378
ENSSSCG00000049378	Upregulated	114167	7	+	60066820	60299471	TCONS_00194366	28	4888	XLOC_052480	ENSSSCG00000049378
ENSSSCG00000049378	Upregulated	114170	7	+	60279210	60284880	TCONS_00194369	2	5611	XLOC_052481	ENSSSCG00000049378
ENSSSCG00000035269	Upregulated	183024	14	+	348345	357230	TCONS_00063921	3	1101	XLOC_017629	NXNL2	nucleoredoxin like 2 [Source:VGNC Symbol;Acc:VGNC:90996]
ENSSSCG00000035269	Upregulated	183025	14	-	356690	357030	TCONS_00071459	1	341	XLOC_019452	NXNL2	nucleoredoxin like 2 [Source:VGNC Symbol;Acc:VGNC:90996]
ENSSSCG00000003608	Upregulated	98344	6	+	88720176	88745915	TCONS_00175609	14	2226	XLOC_047556	LCK	LCK proto-onco, Src family tyrosine kinase [Source:VGNC Symbol;Acc:VGNC:89657]
ENSSSCG00000003608	Upregulated	98345	6	+	88736857	88745917	TCONS_00175610	13	2062	XLOC_047556	LCK	LCK proto-onco, Src family tyrosine kinase [Source:VGNC Symbol;Acc:VGNC:89657]
ENSSSCG00000003608	Upregulated	98346	6	+	88736857	88889821	TCONS_00175611	14	13433	XLOC_047556	LCK	LCK proto-onco, Src family tyrosine kinase [Source:VGNC Symbol;Acc:VGNC:89657]
ENSSSCG00000003608	Upregulated	98347	6	-	88738337	88745891	TCONS_00186395	8	1535	XLOC_050318	LCK	LCK proto-onco, Src family tyrosine kinase [Source:VGNC Symbol;Acc:VGNC:89657]
ENSSSCG00000003608	Upregulated	98348	6	-	88738422	88745891	TCONS_00186396	8	1505	XLOC_050318	LCK	LCK proto-onco, Src family tyrosine kinase [Source:VGNC Symbol;Acc:VGNC:89657]
ENSSSCG00000037862	Upregulated	236953	AEMK02000496.1	-	294433	316935	TCONS_00228664	2	8336	XLOC_062806	ENSSSCG00000037862
ENSSSCG00000037862	Upregulated	236954	AEMK02000496.1	+	294473	316997	TCONS_00228647	2	8358	XLOC_062792	ENSSSCG00000037862
ENSSSCG00000037862	Upregulated	236957	AEMK02000496.1	+	313365	314520	TCONS_00228650	4	582	XLOC_062795	ENSSSCG00000037862
ENSSSCG00000042587	Upregulated	80701	5	-	65455895	65460990	TCONS_00166793	2	5024	XLOC_045271	ENSSSCG00000042587
ENSSSCG00000042587	Upregulated	80702	5	-	65455895	65468398	TCONS_00166794	6	6448	XLOC_045271	ENSSSCG00000042587
ENSSSCG00000042587	Upregulated	80703	5	-	65455895	65468398	TCONS_00166795	9	5762	XLOC_045271	ENSSSCG00000042587
ENSSSCG00000042587	Upregulated	80704	5	-	65459489	65468398	TCONS_00166796	5	2926	XLOC_045271	ENSSSCG00000042587
ENSSSCG00000042587	Upregulated	80705	5	+	65459541	65463994	TCONS_00160811	4	906	XLOC_043608	ENSSSCG00000042587
ENSSSCG00000042587	Upregulated	80706	5	-	65459646	65467963	TCONS_00166797	8	1648	XLOC_045271	ENSSSCG00000042587
ENSSSCG00000034812	Upregulated	216719	17	+	36431992	36487494	TCONS_00095890	25	6253	XLOC_026344	EFCAB8	EF-hand calcium binding domain 8 [Source:HGNC Symbol;Acc:HGNC:34532]
ENSSSCG00000044366	Upregulated	5870	1	+	80244522	80592306	TCONS_00002874	7	3138	XLOC_000901	ENSSSCG00000044366
ENSSSCG00000044366	Upregulated	5871	1	+	80244522	80686293	TCONS_00002875	6	5163	XLOC_000901	ENSSSCG00000044366
ENSSSCG00000044366	Upregulated	5872	1	+	80244624	80377196	TCONS_00002876	5	1364	XLOC_000901	ENSSSCG00000044366
ENSSSCG00000044366	Upregulated	5873	1	+	80244699	80592306	TCONS_00002877	6	3103	XLOC_000901	ENSSSCG00000044366
ENSSSCG00000044366	Upregulated	5874	1	+	80245415	80336448	TCONS_00002878	3	460	XLOC_000901	ENSSSCG00000044366
ENSSSCG00000044366	Upregulated	5875	1	-	80336377	80376731	TCONS_00013937	3	654	XLOC_003970	ENSSSCG00000044366
ENSSSCG00000032503	Upregulated	199824	15	-	38095676	38109270	TCONS_00084864	5	907	XLOC_023037	ENSSSCG00000032503
ENSSSCG00000032503	Upregulated	199825	15	-	38095676	38119360	TCONS_00084865	2	774	XLOC_023037	ENSSSCG00000032503
ENSSSCG00000032503	Upregulated	199826	15	-	38096087	38103450	TCONS_00084866	5	703	XLOC_023037	ENSSSCG00000032503
ENSSSCG00000032503	Upregulated	199827	15	+	38098767	38129941	TCONS_00079778	5	337	XLOC_021579	ENSSSCG00000032503
ENSSSCG00000032503	Upregulated	199828	15	+	38098775	38109326	TCONS_00079779	4	310	XLOC_021579	ENSSSCG00000032503
ENSSSCG00000032503	Upregulated	199829	15	+	38098779	38109326	TCONS_00079780	4	306	XLOC_021579	ENSSSCG00000032503
ENSSSCG00000032503	Upregulated	199830	15	+	38102566	38109326	TCONS_00079781	3	355	XLOC_021579	ENSSSCG00000032503
ENSSSCG00000027678	Upregulated										CCDC175	coiled-coil domain containing 175 [Source:VGNC Symbol;Acc:VGNC:86274]
ENSSSCG00000046323	Upregulated	151524	11	+	48621879	48627688	TCONS_00030621	2	5469	XLOC_008840	ENSSSCG00000046323
ENSSSCG00000046323	Upregulated	151525	11	+	48621879	48629399	TCONS_00030622	3	6933	XLOC_008840	ENSSSCG00000046323
ENSSSCG00000046323	Upregulated	151526	11	+	48621879	48629399	TCONS_00030623	2	7180	XLOC_008840	ENSSSCG00000046323
ENSSSCG00000046323	Upregulated	151527	11	-	48626197	48629463	TCONS_00033370	1	3267	XLOC_009678	ENSSSCG00000046323
ENSSSCG00000051780	Upregulated	53098	3	+	74462588	74466716	TCONS_00132058	2	979	XLOC_035879	ENSSSCG00000051780
ENSSSCG00000051780	Upregulated	53099	3	+	74462588	74469125	TCONS_00132059	2	1214	XLOC_035879	ENSSSCG00000051780
ENSSSCG00000051780	Upregulated	53100	3	+	74462588	74476750	TCONS_00132060	2	790	XLOC_035879	ENSSSCG00000051780
ENSSSCG00000051780	Upregulated	53101	3	-	74474536	74507250	TCONS_00140223	3	1203	XLOC_038023	ENSSSCG00000051780
ENSSSCG00000041016	Upregulated	123303	8	-	53780824	53813485	TCONS_00210673	2	359	XLOC_057083	ENSSSCG00000041016
ENSSSCG00000041016	Upregulated	123307	8	+	53799230	53802264	TCONS_00205948	1	3035	XLOC_055717	ENSSSCG00000041016
ENSSSCG00000041016	Upregulated	123308	8	-	53801163	53801724	TCONS_00210675	1	562	XLOC_057085	ENSSSCG00000041016
ENSSSCG00000041016	Upregulated	123309	8	-	53801971	53802228	TCONS_00210676	1	258	XLOC_057086	ENSSSCG00000041016
ENSSSCG00000046999	Upregulated	50415	3	+	48620887	48644562	TCONS_00130653	7	1776	XLOC_035547	ENSSSCG00000046999
ENSSSCG00000046999	Upregulated	50416	3	+	48631645	48644562	TCONS_00130654	6	2052	XLOC_035547	ENSSSCG00000046999
ENSSSCG00000046999	Upregulated	50417	3	+	48632104	48644562	TCONS_00130655	6	1631	XLOC_035547	ENSSSCG00000046999
ENSSSCG00000046999	Upregulated	50418	3	+	48638012	48644562	TCONS_00130656	3	1714	XLOC_035547	ENSSSCG00000046999
ENSSSCG00000046999	Upregulated	50419	3	+	48638012	48644562	TCONS_00130657	2	2238	XLOC_035547	ENSSSCG00000046999
ENSSSCG00000034619	Upregulated	237239	AEMK02000278.1	-	61297	133402	TCONS_00226596	15	2344	XLOC_061860	ENSSSCG00000034619
ENSSSCG00000034619	Upregulated	237240	AEMK02000278.1	-	61297	224299	TCONS_00226597	4	619	XLOC_061860	ENSSSCG00000034619
ENSSSCG00000034619	Upregulated	237241	AEMK02000278.1	-	61297	225373	TCONS_00226598	3	766	XLOC_061860	ENSSSCG00000034619
ENSSSCG00000034619	Upregulated	237242	AEMK02000278.1	-	61297	225535	TCONS_00226599	4	1044	XLOC_061860	ENSSSCG00000034619
ENSSSCG00000034619	Upregulated	237245	AEMK02000278.1	-	120362	133402	TCONS_00226600	15	3718	XLOC_061860	ENSSSCG00000034619
ENSSSCG00000034619	Upregulated	237246	AEMK02000278.1	-	120362	133402	TCONS_00226601	14	3637	XLOC_061860	ENSSSCG00000034619
ENSSSCG00000034619	Upregulated	237247	AEMK02000278.1	-	120362	225373	TCONS_00226602	12	4259	XLOC_061860	ENSSSCG00000034619
ENSSSCG00000036695	Downregulated	137523	9	-	92055227	92113256	TCONS_00223932	2	642	XLOC_060912	IGF2BP3	insulin like growth factor 2 mRNA binding protein 3 [Source:VGNC Symbol;Acc:VGNC:89056]
ENSSSCG00000036695	Downregulated	137530	9	-	92104847	92271980	TCONS_00223935	13	4039	XLOC_060914	IGF2BP3	insulin like growth factor 2 mRNA binding protein 3 [Source:VGNC Symbol;Acc:VGNC:89056]
ENSSSCG00000036695	Downregulated	137531	9	-	92104847	92272211	TCONS_00223936	13	4105	XLOC_060914	IGF2BP3	insulin like growth factor 2 mRNA binding protein 3 [Source:VGNC Symbol;Acc:VGNC:89056]
ENSSSCG00000036695	Downregulated	137532	9	-	92104847	92272211	TCONS_00223937	15	4513	XLOC_060914	IGF2BP3	insulin like growth factor 2 mRNA binding protein 3 [Source:VGNC Symbol;Acc:VGNC:89056]
ENSSSCG00000036695	Downregulated	137533	9	-	92104849	92271990	TCONS_00223938	14	4173	XLOC_060914	IGF2BP3	insulin like growth factor 2 mRNA binding protein 3 [Source:VGNC Symbol;Acc:VGNC:89056]
ENSSSCG00000036695	Downregulated	137534	9	-	92104851	92271843	TCONS_00223939	14	4006	XLOC_060914	IGF2BP3	insulin like growth factor 2 mRNA binding protein 3 [Source:VGNC Symbol;Acc:VGNC:89056]
ENSSSCG00000036695	Downregulated	137535	9	-	92104854	92272009	TCONS_00223940	14	4967	XLOC_060914	IGF2BP3	insulin like growth factor 2 mRNA binding protein 3 [Source:VGNC Symbol;Acc:VGNC:89056]
ENSSSCG00000036695	Downregulated	137536	9	-	92104868	92271837	TCONS_00223941	14	3827	XLOC_060914	IGF2BP3	insulin like growth factor 2 mRNA binding protein 3 [Source:VGNC Symbol;Acc:VGNC:89056]
ENSSSCG00000036695	Downregulated	137539	9	-	92268408	92272211	TCONS_00223942	3	2441	XLOC_060914	IGF2BP3	insulin like growth factor 2 mRNA binding protein 3 [Source:VGNC Symbol;Acc:VGNC:89056]
ENSSSCG00000043977	Downregulated	88076	6	-	32077536	32081683	TCONS_00181297	2	3805	XLOC_049061	ENSSSCG00000043977
ENSSSCG00000043977	Downregulated	88077	6	-	32077536	32083692	TCONS_00181298	3	3725	XLOC_049061	ENSSSCG00000043977
ENSSSCG00000043977	Downregulated	88078	6	+	32081055	32084735	TCONS_00170457	1	3681	XLOC_046259	ENSSSCG00000043977
ENSSSCG00000032857	Downregulated	67274	4	-	96225480	96227160	TCONS_00154045	3	703	XLOC_041792	S100A12	S100 calcium binding protein A12 [Source:VGNC Symbol;Acc:VGNC:92538]
ENSSSCG00000032857	Downregulated	67275	4	+	96225693	96227137	TCONS_00147420	3	467	XLOC_040006	S100A12	S100 calcium binding protein A12 [Source:VGNC Symbol;Acc:VGNC:92538]
ENSSSCG00000029592	Downregulated	79526	5	-	59522630	59597460	TCONS_00166240	2	287	XLOC_045110	GPRC5A	G protein-coupled receptor class C group 5 member A [Source:VGNC Symbol;Acc:VGNC:88642]
ENSSSCG00000029592	Downregulated	79571	5	-	59565326	59575267	TCONS_00166267	4	2412	XLOC_045118	GPRC5A	G protein-coupled receptor class C group 5 member A [Source:VGNC Symbol;Acc:VGNC:88642]
ENSSSCG00000029592	Downregulated	79572	5	-	59565326	59586600	TCONS_00166268	3	3238	XLOC_045118	GPRC5A	G protein-coupled receptor class C group 5 member A [Source:VGNC Symbol;Acc:VGNC:88642]
ENSSSCG00000029592	Downregulated	79573	5	-	59565326	59586600	TCONS_00166269	4	2469	XLOC_045118	GPRC5A	G protein-coupled receptor class C group 5 member A [Source:VGNC Symbol;Acc:VGNC:88642]
ENSSSCG00000029592	Downregulated	79574	5	-	59565326	59586600	TCONS_00166270	5	3278	XLOC_045118	GPRC5A	G protein-coupled receptor class C group 5 member A [Source:VGNC Symbol;Acc:VGNC:88642]
ENSSSCG00000029592	Downregulated	79575	5	-	59565326	59586600	TCONS_00166271	3	1540	XLOC_045118	GPRC5A	G protein-coupled receptor class C group 5 member A [Source:VGNC Symbol;Acc:VGNC:88642]
ENSSSCG00000029592	Downregulated	79576	5	-	59565326	59586789	TCONS_00166272	5	2817	XLOC_045118	GPRC5A	G protein-coupled receptor class C group 5 member A [Source:VGNC Symbol;Acc:VGNC:88642]
ENSSSCG00000029592	Downregulated	79577	5	-	59565408	59586598	TCONS_00166273	4	3313	XLOC_045118	GPRC5A	G protein-coupled receptor class C group 5 member A [Source:VGNC Symbol;Acc:VGNC:88642]
ENSSSCG00000029592	Downregulated	79578	5	-	59565799	59570768	TCONS_00166274	5	1777	XLOC_045118	GPRC5A	G protein-coupled receptor class C group 5 member A [Source:VGNC Symbol;Acc:VGNC:88642]
ENSSSCG00000029592	Downregulated	79579	5	-	59565799	59586600	TCONS_00166275	5	1877	XLOC_045118	GPRC5A	G protein-coupled receptor class C group 5 member A [Source:VGNC Symbol;Acc:VGNC:88642]
ENSSSCG00000029592	Downregulated	79580	5	+	59565807	59586588	TCONS_00160213	4	1976	XLOC_043449	GPRC5A	G protein-coupled receptor class C group 5 member A [Source:VGNC Symbol;Acc:VGNC:88642]
ENSSSCG00000029592	Downregulated	79581	5	+	59565817	59586588	TCONS_00160214	4	1966	XLOC_043449	GPRC5A	G protein-coupled receptor class C group 5 member A [Source:VGNC Symbol;Acc:VGNC:88642]
ENSSSCG00000029592	Downregulated	79582	5	+	59565817	59586588	TCONS_00160215	3	1037	XLOC_043449	GPRC5A	G protein-coupled receptor class C group 5 member A [Source:VGNC Symbol;Acc:VGNC:88642]
ENSSSCG00000006588	Downregulated	67268	4	-	96185649	96351292	TCONS_00154042	3	1086	XLOC_041789	ENSSSCG00000006588	S100 calcium binding protein A9 [Source:VGNC Symbol;Acc:VGNC:92547]
ENSSSCG00000006588	Downregulated	67273	4	-	96212155	96346918	TCONS_00154044	2	309	XLOC_041791	ENSSSCG00000006588	S100 calcium binding protein A9 [Source:VGNC Symbol;Acc:VGNC:92547]
ENSSSCG00000006588	Downregulated	67276	4	-	96236113	96239285	TCONS_00154046	5	853	XLOC_041793	ENSSSCG00000006588	S100 calcium binding protein A9 [Source:VGNC Symbol;Acc:VGNC:92547]
ENSSSCG00000006588	Downregulated	67277	4	-	96236113	96239285	TCONS_00154047	4	794	XLOC_041793	ENSSSCG00000006588	S100 calcium binding protein A9 [Source:VGNC Symbol;Acc:VGNC:92547]
ENSSSCG00000006588	Downregulated	67278	4	+	96236118	96239273	TCONS_00147421	4	777	XLOC_040007	ENSSSCG00000006588	S100 calcium binding protein A9 [Source:VGNC Symbol;Acc:VGNC:92547]
ENSSSCG00000006588	Downregulated	67279	4	+	96236146	96239273	TCONS_00147422	4	745	XLOC_040007	ENSSSCG00000006588	S100 calcium binding protein A9 [Source:VGNC Symbol;Acc:VGNC:92547]
ENSSSCG00000006588	Downregulated	67280	4	-	96236318	96238875	TCONS_00154048	4	447	XLOC_041793	ENSSSCG00000006588	S100 calcium binding protein A9 [Source:VGNC Symbol;Acc:VGNC:92547]
ENSSSCG00000033560	Downregulated	12113	1	+	157953963	158143100	TCONS_00005906	24	6211	XLOC_001640	ENSSSCG00000033560
ENSSSCG00000033560	Downregulated	12123	1	+	158053372	158069376	TCONS_00005912	7	2575	XLOC_001642	ENSSSCG00000033560
ENSSSCG00000033560	Downregulated	12124	1	+	158053372	158079439	TCONS_00005913	7	2750	XLOC_001642	ENSSSCG00000033560
ENSSSCG00000033560	Downregulated	12125	1	+	158053372	158079439	TCONS_00005914	7	2750	XLOC_001642	ENSSSCG00000033560
ENSSSCG00000033560	Downregulated	12126	1	+	158053372	158089159	TCONS_00005915	8	1997	XLOC_001642	ENSSSCG00000033560
ENSSSCG00000033560	Downregulated	12127	1	+	158053372	158089159	TCONS_00005916	7	2610	XLOC_001642	ENSSSCG00000033560
ENSSSCG00000033560	Downregulated	12128	1	+	158053372	158089159	TCONS_00005917	7	2610	XLOC_001642	ENSSSCG00000033560
ENSSSCG00000033560	Downregulated	12129	1	+	158053372	158089159	TCONS_00005918	7	2610	XLOC_001642	ENSSSCG00000033560
ENSSSCG00000033560	Downregulated	12130	1	+	158053658	158068946	TCONS_00005919	8	1085	XLOC_001642	ENSSSCG00000033560
ENSSSCG00000033560	Downregulated	12131	1	+	158053658	158068946	TCONS_00005920	9	1241	XLOC_001642	ENSSSCG00000033560
ENSSSCG00000033560	Downregulated	12132	1	+	158063578	158069376	TCONS_00005921	7	1159	XLOC_001642	ENSSSCG00000033560
ENSSSCG00000033560	Downregulated	12133	1	+	158063578	158069376	TCONS_00005922	8	1515	XLOC_001642	ENSSSCG00000033560
ENSSSCG00000033560	Downregulated	12134	1	+	158063578	158069376	TCONS_00005923	8	1676	XLOC_001642	ENSSSCG00000033560
ENSSSCG00000033560	Downregulated	12135	1	+	158063578	158079439	TCONS_00005924	8	1851	XLOC_001642	ENSSSCG00000033560
ENSSSCG00000033560	Downregulated	12136	1	+	158063578	158089159	TCONS_00005925	8	1711	XLOC_001642	ENSSSCG00000033560
ENSSSCG00000033560	Downregulated	12137	1	+	158063578	158089159	TCONS_00005926	8	1711	XLOC_001642	ENSSSCG00000033560
ENSSSCG00000033560	Downregulated	12138	1	-	158064242	158065069	TCONS_00017127	2	197	XLOC_004719	ENSSSCG00000033560
ENSSSCG00000033560	Downregulated	12139	1	-	158068062	158088875	TCONS_00017128	4	653	XLOC_004720	ENSSSCG00000033560
ENSSSCG00000033560	Downregulated	12140	1	+	158074168	158079439	TCONS_00005927	7	1772	XLOC_001642	ENSSSCG00000033560
ENSSSCG00000033560	Downregulated	12141	1	+	158074168	158089159	TCONS_00005928	7	1632	XLOC_001642	ENSSSCG00000033560
ENSSSCG00000049893	Downregulated	67356	4	+	96525437	96525661	TCONS_00147462	2	217	XLOC_040019	ENSSSCG00000049893
ENSSSCG00000049893	Downregulated	67357	4	-	96525521	96526259	TCONS_00154080	2	606	XLOC_041811	ENSSSCG00000049893
ENSSSCG00000039651	Downregulated	94524	6	-	69507825	69510781	TCONS_00184458	7	1372	XLOC_049927	SLC2A5	solute carrier family 2 member 5 [Source:VGNC Symbol;Acc:VGNC:93050]
ENSSSCG00000039651	Downregulated	94525	6	-	69507825	69524490	TCONS_00184459	11	1934	XLOC_049927	SLC2A5	solute carrier family 2 member 5 [Source:VGNC Symbol;Acc:VGNC:93050]
ENSSSCG00000039651	Downregulated	94526	6	-	69507825	69535372	TCONS_00184460	12	2154	XLOC_049927	SLC2A5	solute carrier family 2 member 5 [Source:VGNC Symbol;Acc:VGNC:93050]
ENSSSCG00000039651	Downregulated	94527	6	-	69507825	69535372	TCONS_00184461	12	2152	XLOC_049927	SLC2A5	solute carrier family 2 member 5 [Source:VGNC Symbol;Acc:VGNC:93050]
ENSSSCG00000039651	Downregulated	94528	6	-	69507825	69535372	TCONS_00184462	12	2154	XLOC_049927	SLC2A5	solute carrier family 2 member 5 [Source:VGNC Symbol;Acc:VGNC:93050]
ENSSSCG00000039651	Downregulated	94529	6	-	69507825	69535372	TCONS_00184463	12	2154	XLOC_049927	SLC2A5	solute carrier family 2 member 5 [Source:VGNC Symbol;Acc:VGNC:93050]
ENSSSCG00000039651	Downregulated	94530	6	-	69507825	69535372	TCONS_00184464	12	2154	XLOC_049927	SLC2A5	solute carrier family 2 member 5 [Source:VGNC Symbol;Acc:VGNC:93050]
ENSSSCG00000039651	Downregulated	94531	6	-	69507825	69535372	TCONS_00184465	12	2154	XLOC_049927	SLC2A5	solute carrier family 2 member 5 [Source:VGNC Symbol;Acc:VGNC:93050]
ENSSSCG00000039651	Downregulated	94532	6	-	69507825	69535372	TCONS_00184466	12	2154	XLOC_049927	SLC2A5	solute carrier family 2 member 5 [Source:VGNC Symbol;Acc:VGNC:93050]
ENSSSCG00000039651	Downregulated	94533	6	-	69507825	69535372	TCONS_00184467	12	2154	XLOC_049927	SLC2A5	solute carrier family 2 member 5 [Source:VGNC Symbol;Acc:VGNC:93050]
ENSSSCG00000039651	Downregulated	94534	6	-	69507825	69535372	TCONS_00184468	12	2154	XLOC_049927	SLC2A5	solute carrier family 2 member 5 [Source:VGNC Symbol;Acc:VGNC:93050]
ENSSSCG00000039651	Downregulated	94535	6	-	69507825	69535372	TCONS_00184469	12	2154	XLOC_049927	SLC2A5	solute carrier family 2 member 5 [Source:VGNC Symbol;Acc:VGNC:93050]
ENSSSCG00000039651	Downregulated	94536	6	+	69507857	69532747	TCONS_00173737	12	2035	XLOC_047141	SLC2A5	solute carrier family 2 member 5 [Source:VGNC Symbol;Acc:VGNC:93050]
ENSSSCG00000039651	Downregulated	94537	6	+	69507857	69535799	TCONS_00173738	12	2549	XLOC_047141	SLC2A5	solute carrier family 2 member 5 [Source:VGNC Symbol;Acc:VGNC:93050]
ENSSSCG00000039651	Downregulated	94538	6	+	69507857	69535799	TCONS_00173739	12	2547	XLOC_047141	SLC2A5	solute carrier family 2 member 5 [Source:VGNC Symbol;Acc:VGNC:93050]
ENSSSCG00000001909	Downregulated	114025	7	-	59317974	59347252	TCONS_00201263	18	3841	XLOC_054357	STRA6	signaling receptor and transporter of retinol STRA6 [Source:VGNC Symbol;Acc:VGNC:93573]
ENSSSCG00000001909	Downregulated	114026	7	-	59317974	59347252	TCONS_00201264	18	3833	XLOC_054357	STRA6	signaling receptor and transporter of retinol STRA6 [Source:VGNC Symbol;Acc:VGNC:93573]
ENSSSCG00000001909	Downregulated	114027	7	+	59318010	59343872	TCONS_00194302	16	1748	XLOC_052464	STRA6	signaling receptor and transporter of retinol STRA6 [Source:VGNC Symbol;Acc:VGNC:93573]
ENSSSCG00000001909	Downregulated	114028	7	+	59318010	59347267	TCONS_00194303	20	3054	XLOC_052464	STRA6	signaling receptor and transporter of retinol STRA6 [Source:VGNC Symbol;Acc:VGNC:93573]
ENSSSCG00000001909	Downregulated	114029	7	+	59318010	59347267	TCONS_00194304	18	3009	XLOC_052464	STRA6	signaling receptor and transporter of retinol STRA6 [Source:VGNC Symbol;Acc:VGNC:93573]
ENSSSCG00000001909	Downregulated	114030	7	+	59318010	59347292	TCONS_00194305	19	2915	XLOC_052464	STRA6	signaling receptor and transporter of retinol STRA6 [Source:VGNC Symbol;Acc:VGNC:93573]
ENSSSCG00000001909	Downregulated	114031	7	+	59318010	59347292	TCONS_00194306	19	3067	XLOC_052464	STRA6	signaling receptor and transporter of retinol STRA6 [Source:VGNC Symbol;Acc:VGNC:93573]
ENSSSCG00000001909	Downregulated	114032	7	+	59318010	59347292	TCONS_00194307	19	3017	XLOC_052464	STRA6	signaling receptor and transporter of retinol STRA6 [Source:VGNC Symbol;Acc:VGNC:93573]
ENSSSCG00000001909	Downregulated	114033	7	+	59318010	59347292	TCONS_00194308	19	3038	XLOC_052464	STRA6	signaling receptor and transporter of retinol STRA6 [Source:VGNC Symbol;Acc:VGNC:93573]
ENSSSCG00000001909	Downregulated	114034	7	-	59329736	59347252	TCONS_00201265	16	2464	XLOC_054357	STRA6	signaling receptor and transporter of retinol STRA6 [Source:VGNC Symbol;Acc:VGNC:93573]
ENSSSCG00000001909	Downregulated	114035	7	-	59336297	59347252	TCONS_00201266	8	1612	XLOC_054357	STRA6	signaling receptor and transporter of retinol STRA6 [Source:VGNC Symbol;Acc:VGNC:93573]
ENSSSCG00000001909	Downregulated	114036	7	-	59341368	59345742	TCONS_00201267	5	701	XLOC_054357	STRA6	signaling receptor and transporter of retinol STRA6 [Source:VGNC Symbol;Acc:VGNC:93573]
ENSSSCG00000040382	Downregulated	180977	13	+	193824464	193825532	TCONS_00054172	1	1069	XLOC_014991	ENSSSCG00000040382
ENSSSCG00000040382	Downregulated	180978	13	-	193824913	193825407	TCONS_00062928	2	465	XLOC_017292	ENSSSCG00000040382
ENSSSCG00000006758	Downregulated	69282	4	+	106346937	106626957	TCONS_00148403	17	6730	XLOC_040271	SYT6	synaptotagmin 6 [Source:VGNC Symbol;Acc:VGNC:93687]
ENSSSCG00000006758	Downregulated	69287	4	+	106425692	106484738	TCONS_00148404	7	2422	XLOC_040272	SYT6	synaptotagmin 6 [Source:VGNC Symbol;Acc:VGNC:93687]
ENSSSCG00000006758	Downregulated	69288	4	+	106425692	106486931	TCONS_00148405	8	4753	XLOC_040272	SYT6	synaptotagmin 6 [Source:VGNC Symbol;Acc:VGNC:93687]
ENSSSCG00000006758	Downregulated	69289	4	+	106425692	106487082	TCONS_00148406	8	4835	XLOC_040272	SYT6	synaptotagmin 6 [Source:VGNC Symbol;Acc:VGNC:93687]
ENSSSCG00000006758	Downregulated	69290	4	+	106425692	106487082	TCONS_00148407	7	4766	XLOC_040272	SYT6	synaptotagmin 6 [Source:VGNC Symbol;Acc:VGNC:93687]
ENSSSCG00000006758	Downregulated	69291	4	-	106437468	106485390	TCONS_00155062	7	3075	XLOC_042049	SYT6	synaptotagmin 6 [Source:VGNC Symbol;Acc:VGNC:93687]
ENSSSCG00000006758	Downregulated	69292	4	-	106439389	106485355	TCONS_00155063	6	2427	XLOC_042049	SYT6	synaptotagmin 6 [Source:VGNC Symbol;Acc:VGNC:93687]
ENSSSCG00000016652	Downregulated	223782	18	-	34424513	34465457	TCONS_00105711	2	4702	XLOC_029053	LRRN3	leucine rich repeat neuronal 3 [Source:VGNC Symbol;Acc:VGNC:89862]
ENSSSCG00000016652	Downregulated	223783	18	+	34425844	34465672	TCONS_00103082	2	3586	XLOC_028310	LRRN3	leucine rich repeat neuronal 3 [Source:VGNC Symbol;Acc:VGNC:89862]
ENSSSCG00000016652	Downregulated	223784	18	+	34425882	34436077	TCONS_00103083	3	2535	XLOC_028310	LRRN3	leucine rich repeat neuronal 3 [Source:VGNC Symbol;Acc:VGNC:89862]
ENSSSCG00000023235	Downregulated	97070	6	+	83089072	83226863	TCONS_00175019	14	1530	XLOC_047415	MAN1C1	mannosidase alpha class 1C member 1 [Source:VGNC Symbol;Acc:VGNC:89968]
ENSSSCG00000023235	Downregulated	97071	6	+	83089072	83228008	TCONS_00175020	13	1703	XLOC_047415	MAN1C1	mannosidase alpha class 1C member 1 [Source:VGNC Symbol;Acc:VGNC:89968]
ENSSSCG00000023235	Downregulated	97072	6	+	83089072	83228779	TCONS_00175021	14	2480	XLOC_047415	MAN1C1	mannosidase alpha class 1C member 1 [Source:VGNC Symbol;Acc:VGNC:89968]
ENSSSCG00000023235	Downregulated	97073	6	+	83089072	83228779	TCONS_00175022	15	2479	XLOC_047415	MAN1C1	mannosidase alpha class 1C member 1 [Source:VGNC Symbol;Acc:VGNC:89968]
ENSSSCG00000023235	Downregulated	97074	6	+	83089072	83228779	TCONS_00175023	14	2473	XLOC_047415	MAN1C1	mannosidase alpha class 1C member 1 [Source:VGNC Symbol;Acc:VGNC:89968]
ENSSSCG00000023235	Downregulated	97075	6	+	83089072	83228779	TCONS_00175024	14	3446	XLOC_047415	MAN1C1	mannosidase alpha class 1C member 1 [Source:VGNC Symbol;Acc:VGNC:89968]
ENSSSCG00000023235	Downregulated	97076	6	+	83089072	83228779	TCONS_00175025	14	2480	XLOC_047415	MAN1C1	mannosidase alpha class 1C member 1 [Source:VGNC Symbol;Acc:VGNC:89968]
ENSSSCG00000023235	Downregulated	97077	6	+	83089072	83228779	TCONS_00175026	13	2474	XLOC_047415	MAN1C1	mannosidase alpha class 1C member 1 [Source:VGNC Symbol;Acc:VGNC:89968]
ENSSSCG00000023235	Downregulated	97078	6	+	83089072	83228779	TCONS_00175027	13	3440	XLOC_047415	MAN1C1	mannosidase alpha class 1C member 1 [Source:VGNC Symbol;Acc:VGNC:89968]
ENSSSCG00000023235	Downregulated	97079	6	+	83089988	83228644	TCONS_00175028	11	4489	XLOC_047415	MAN1C1	mannosidase alpha class 1C member 1 [Source:VGNC Symbol;Acc:VGNC:89968]
ENSSSCG00000023235	Downregulated	97080	6	+	83089988	83228779	TCONS_00175029	12	3657	XLOC_047415	MAN1C1	mannosidase alpha class 1C member 1 [Source:VGNC Symbol;Acc:VGNC:89968]
ENSSSCG00000023235	Downregulated	97081	6	-	83090764	83225028	TCONS_00185713	9	1482	XLOC_050189	MAN1C1	mannosidase alpha class 1C member 1 [Source:VGNC Symbol;Acc:VGNC:89968]
ENSSSCG00000023235	Downregulated	97082	6	-	83090764	83228699	TCONS_00185714	12	2801	XLOC_050189	MAN1C1	mannosidase alpha class 1C member 1 [Source:VGNC Symbol;Acc:VGNC:89968]
ENSSSCG00000023235	Downregulated	97083	6	+	83147018	83262808	TCONS_00175030	2	889	XLOC_047416	MAN1C1	mannosidase alpha class 1C member 1 [Source:VGNC Symbol;Acc:VGNC:89968]
ENSSSCG00000023235	Downregulated	97084	6	+	83193805	83228779	TCONS_00175031	10	3026	XLOC_047415	MAN1C1	mannosidase alpha class 1C member 1 [Source:VGNC Symbol;Acc:VGNC:89968]
ENSSSCG00000043242	Downregulated	180979	13	+	193827816	193834300	TCONS_00054173	3	1101	XLOC_014992	ENSSSCG00000043242
ENSSSCG00000043242	Downregulated	180980	13	-	193827885	193828820	TCONS_00062929	1	936	XLOC_017293	ENSSSCG00000043242
ENSSSCG00000043242	Downregulated	180981	13	-	193827885	193830370	TCONS_00062930	3	648	XLOC_017293	ENSSSCG00000043242
ENSSSCG00000043242	Downregulated	180982	13	+	193827955	193828361	TCONS_00054174	1	407	XLOC_014992	ENSSSCG00000043242
ENSSSCG00000043242	Downregulated	180983	13	+	193827955	193828756	TCONS_00054175	3	608	XLOC_014992	ENSSSCG00000043242
ENSSSCG00000017072	Downregulated	212360	16	-	68723995	68961287	TCONS_00093663	11	5573	XLOC_025650	GALNT10	polypeptide N-acetylgalactosaminyltransferase 10 [Source:VGNC Symbol;Acc:VGNC:88327]
ENSSSCG00000017072	Downregulated	212361	16	-	68723995	68961287	TCONS_00093664	12	5690	XLOC_025650	GALNT10	polypeptide N-acetylgalactosaminyltransferase 10 [Source:VGNC Symbol;Acc:VGNC:88327]
ENSSSCG00000017072	Downregulated	212362	16	-	68723995	68961287	TCONS_00093665	10	5365	XLOC_025650	GALNT10	polypeptide N-acetylgalactosaminyltransferase 10 [Source:VGNC Symbol;Acc:VGNC:88327]
ENSSSCG00000017072	Downregulated	212363	16	-	68723995	68961287	TCONS_00093666	10	5387	XLOC_025650	GALNT10	polypeptide N-acetylgalactosaminyltransferase 10 [Source:VGNC Symbol;Acc:VGNC:88327]
ENSSSCG00000017072	Downregulated	212364	16	-	68723995	68961287	TCONS_00093667	12	5690	XLOC_025650	GALNT10	polypeptide N-acetylgalactosaminyltransferase 10 [Source:VGNC Symbol;Acc:VGNC:88327]
ENSSSCG00000017072	Downregulated	212365	16	-	68723995	68961287	TCONS_00093668	12	5690	XLOC_025650	GALNT10	polypeptide N-acetylgalactosaminyltransferase 10 [Source:VGNC Symbol;Acc:VGNC:88327]
ENSSSCG00000017072	Downregulated	212366	16	-	68723995	68961287	TCONS_00093669	12	5690	XLOC_025650	GALNT10	polypeptide N-acetylgalactosaminyltransferase 10 [Source:VGNC Symbol;Acc:VGNC:88327]
ENSSSCG00000017072	Downregulated	212367	16	-	68723995	68961287	TCONS_00093670	12	5690	XLOC_025650	GALNT10	polypeptide N-acetylgalactosaminyltransferase 10 [Source:VGNC Symbol;Acc:VGNC:88327]
ENSSSCG00000017072	Downregulated	212368	16	-	68723995	68961287	TCONS_00093671	12	5690	XLOC_025650	GALNT10	polypeptide N-acetylgalactosaminyltransferase 10 [Source:VGNC Symbol;Acc:VGNC:88327]
ENSSSCG00000017072	Downregulated	212369	16	-	68723995	68961287	TCONS_00093672	12	5690	XLOC_025650	GALNT10	polypeptide N-acetylgalactosaminyltransferase 10 [Source:VGNC Symbol;Acc:VGNC:88327]
ENSSSCG00000017072	Downregulated	212370	16	-	68723995	68961287	TCONS_00093673	12	5690	XLOC_025650	GALNT10	polypeptide N-acetylgalactosaminyltransferase 10 [Source:VGNC Symbol;Acc:VGNC:88327]
ENSSSCG00000017072	Downregulated	212371	16	-	68723995	68961287	TCONS_00093674	11	5504	XLOC_025650	GALNT10	polypeptide N-acetylgalactosaminyltransferase 10 [Source:VGNC Symbol;Acc:VGNC:88327]
ENSSSCG00000017072	Downregulated	212372	16	-	68723995	68961287	TCONS_00093675	11	5573	XLOC_025650	GALNT10	polypeptide N-acetylgalactosaminyltransferase 10 [Source:VGNC Symbol;Acc:VGNC:88327]
ENSSSCG00000017072	Downregulated	212373	16	-	68723995	69006111	TCONS_00093676	10	5197	XLOC_025650	GALNT10	polypeptide N-acetylgalactosaminyltransferase 10 [Source:VGNC Symbol;Acc:VGNC:88327]
ENSSSCG00000017072	Downregulated	212374	16	+	68724072	68727867	TCONS_00091070	1	3796	XLOC_024863	GALNT10	polypeptide N-acetylgalactosaminyltransferase 10 [Source:VGNC Symbol;Acc:VGNC:88327]
ENSSSCG00000017072	Downregulated	212375	16	+	68740583	68766231	TCONS_00091071	3	325	XLOC_024864	GALNT10	polypeptide N-acetylgalactosaminyltransferase 10 [Source:VGNC Symbol;Acc:VGNC:88327]
ENSSSCG00000010507	Downregulated	194335	14	-	107812941	107830502	TCONS_00077111	9	4081	XLOC_020816	TLL2	tolloid like 2 [Source:VGNC Symbol;Acc:VGNC:94019]
ENSSSCG00000010507	Downregulated	194336	14	-	107812941	107842295	TCONS_00077112	13	4626	XLOC_020816	TLL2	tolloid like 2 [Source:VGNC Symbol;Acc:VGNC:94019]
ENSSSCG00000010507	Downregulated	194337	14	-	107812941	107842295	TCONS_00077113	13	4626	XLOC_020816	TLL2	tolloid like 2 [Source:VGNC Symbol;Acc:VGNC:94019]
ENSSSCG00000010507	Downregulated	194338	14	-	107812941	107878222	TCONS_00077114	20	5546	XLOC_020816	TLL2	tolloid like 2 [Source:VGNC Symbol;Acc:VGNC:94019]
ENSSSCG00000010507	Downregulated	194339	14	-	107812941	107894206	TCONS_00077115	20	5443	XLOC_020816	TLL2	tolloid like 2 [Source:VGNC Symbol;Acc:VGNC:94019]
ENSSSCG00000010507	Downregulated	194340	14	-	107812941	107894211	TCONS_00077116	19	5302	XLOC_020816	TLL2	tolloid like 2 [Source:VGNC Symbol;Acc:VGNC:94019]
ENSSSCG00000010507	Downregulated	194341	14	-	107812941	107894221	TCONS_00077117	20	5458	XLOC_020816	TLL2	tolloid like 2 [Source:VGNC Symbol;Acc:VGNC:94019]
ENSSSCG00000010507	Downregulated	194342	14	-	107812941	107961155	TCONS_00077118	20	6613	XLOC_020816	TLL2	tolloid like 2 [Source:VGNC Symbol;Acc:VGNC:94019]
ENSSSCG00000010507	Downregulated	194343	14	-	107812941	107961155	TCONS_00077119	22	6119	XLOC_020816	TLL2	tolloid like 2 [Source:VGNC Symbol;Acc:VGNC:94019]
ENSSSCG00000010507	Downregulated	194344	14	-	107812941	107961155	TCONS_00077120	22	6119	XLOC_020816	TLL2	tolloid like 2 [Source:VGNC Symbol;Acc:VGNC:94019]
ENSSSCG00000010507	Downregulated	194345	14	-	107812941	107961155	TCONS_00077121	21	5973	XLOC_020816	TLL2	tolloid like 2 [Source:VGNC Symbol;Acc:VGNC:94019]
ENSSSCG00000010507	Downregulated	194346	14	-	107812941	107961155	TCONS_00077122	22	6119	XLOC_020816	TLL2	tolloid like 2 [Source:VGNC Symbol;Acc:VGNC:94019]
ENSSSCG00000010507	Downregulated	194347	14	-	107812945	107961155	TCONS_00077123	21	6037	XLOC_020816	TLL2	tolloid like 2 [Source:VGNC Symbol;Acc:VGNC:94019]
ENSSSCG00000010507	Downregulated	194348	14	-	107812945	107961155	TCONS_00077124	21	5959	XLOC_020816	TLL2	tolloid like 2 [Source:VGNC Symbol;Acc:VGNC:94019]
ENSSSCG00000010507	Downregulated	194349	14	-	107812945	107961155	TCONS_00077125	22	6115	XLOC_020816	TLL2	tolloid like 2 [Source:VGNC Symbol;Acc:VGNC:94019]
ENSSSCG00000010507	Downregulated	194350	14	+	107813051	107827805	TCONS_00069569	5	4203	XLOC_018999	TLL2	tolloid like 2 [Source:VGNC Symbol;Acc:VGNC:94019]
ENSSSCG00000010507	Downregulated	194351	14	+	107840227	107842352	TCONS_00069570	4	440	XLOC_019000	TLL2	tolloid like 2 [Source:VGNC Symbol;Acc:VGNC:94019]
ENSSSCG00000003018	Downregulated	90798	6	+	49540907	49560126	TCONS_00171854	10	3582	XLOC_046636	LIPE	lipase E, hormone sensitive type [Source:VGNC Symbol;Acc:VGNC:98493]
ENSSSCG00000003018	Downregulated	90799	6	+	49543017	49560126	TCONS_00171855	11	3444	XLOC_046636	LIPE	lipase E, hormone sensitive type [Source:VGNC Symbol;Acc:VGNC:98493]
ENSSSCG00000003018	Downregulated	90800	6	-	49543584	49559570	TCONS_00182618	10	2441	XLOC_049409	LIPE	lipase E, hormone sensitive type [Source:VGNC Symbol;Acc:VGNC:98493]
ENSSSCG00000003018	Downregulated	90801	6	+	49549303	49560125	TCONS_00171856	10	2855	XLOC_046636	LIPE	lipase E, hormone sensitive type [Source:VGNC Symbol;Acc:VGNC:98493]
ENSSSCG00000003018	Downregulated	90802	6	-	49549306	49559577	TCONS_00182619	10	2304	XLOC_049409	LIPE	lipase E, hormone sensitive type [Source:VGNC Symbol;Acc:VGNC:98493]
ENSSSCG00000011060	Downregulated	146297	10	-	49313641	49390926	TCONS_00028095	16	5411	XLOC_007982	GAD2	glutamate decarboxylase 2 [Source:NCBI gene (formerly Entrezgene);Acc:396929]
ENSSSCG00000011060	Downregulated	146298	10	-	49313641	49390926	TCONS_00028096	16	5411	XLOC_007982	GAD2	glutamate decarboxylase 2 [Source:NCBI gene (formerly Entrezgene);Acc:396929]
ENSSSCG00000011060	Downregulated	146299	10	-	49313641	49390926	TCONS_00028097	16	5411	XLOC_007982	GAD2	glutamate decarboxylase 2 [Source:NCBI gene (formerly Entrezgene);Acc:396929]
ENSSSCG00000011060	Downregulated	146300	10	-	49313641	49390926	TCONS_00028098	17	5411	XLOC_007982	GAD2	glutamate decarboxylase 2 [Source:NCBI gene (formerly Entrezgene);Acc:396929]
ENSSSCG00000011060	Downregulated	146301	10	-	49313641	49390993	TCONS_00028099	16	5478	XLOC_007982	GAD2	glutamate decarboxylase 2 [Source:NCBI gene (formerly Entrezgene);Acc:396929]
ENSSSCG00000011060	Downregulated	146302	10	-	49313641	49391019	TCONS_00028100	15	5360	XLOC_007982	GAD2	glutamate decarboxylase 2 [Source:NCBI gene (formerly Entrezgene);Acc:396929]
ENSSSCG00000011060	Downregulated	146303	10	-	49313641	49391059	TCONS_00028101	17	5544	XLOC_007982	GAD2	glutamate decarboxylase 2 [Source:NCBI gene (formerly Entrezgene);Acc:396929]
ENSSSCG00000011060	Downregulated	146304	10	+	49313680	49317926	TCONS_00024688	1	4247	XLOC_006942	GAD2	glutamate decarboxylase 2 [Source:NCBI gene (formerly Entrezgene);Acc:396929]
ENSSSCG00000011060	Downregulated	146305	10	+	49313680	49334426	TCONS_00024689	4	3889	XLOC_006942	GAD2	glutamate decarboxylase 2 [Source:NCBI gene (formerly Entrezgene);Acc:396929]
ENSSSCG00000039561	Downregulated	177256	13	-	131091438	131125504	TCONS_00061094	5	821	XLOC_016717	ENSSSCG00000039561
ENSSSCG00000039561	Downregulated	177257	13	-	131091438	131125504	TCONS_00061095	5	953	XLOC_016717	ENSSSCG00000039561
ENSSSCG00000039561	Downregulated	177258	13	+	131091748	131102715	TCONS_00052290	4	491	XLOC_014448	ENSSSCG00000039561
ENSSSCG00000039561	Downregulated	177263	13	-	131098274	131125504	TCONS_00061098	4	2673	XLOC_016717	ENSSSCG00000039561
ENSSSCG00000039561	Downregulated	177264	13	+	131099556	131102715	TCONS_00052293	3	1239	XLOC_014448	ENSSSCG00000039561
ENSSSCG00000029284	Downregulated	89294	6	-	45247968	45271550	TCONS_00181894	29	4786	XLOC_049215	NPHS1	NPHS1 adhesion molecule, nephrin [Source:VGNC Symbol;Acc:VGNC:90849]
ENSSSCG00000029284	Downregulated	89295	6	-	45247968	45271550	TCONS_00181895	28	4664	XLOC_049215	NPHS1	NPHS1 adhesion molecule, nephrin [Source:VGNC Symbol;Acc:VGNC:90849]
ENSSSCG00000029284	Downregulated	89296	6	-	45247968	45271550	TCONS_00181896	29	4815	XLOC_049215	NPHS1	NPHS1 adhesion molecule, nephrin [Source:VGNC Symbol;Acc:VGNC:90849]
ENSSSCG00000029284	Downregulated	89297	6	-	45247968	45271550	TCONS_00181897	29	4846	XLOC_049215	NPHS1	NPHS1 adhesion molecule, nephrin [Source:VGNC Symbol;Acc:VGNC:90849]
ENSSSCG00000029284	Downregulated	89298	6	-	45247968	45271550	TCONS_00181898	29	4846	XLOC_049215	NPHS1	NPHS1 adhesion molecule, nephrin [Source:VGNC Symbol;Acc:VGNC:90849]
ENSSSCG00000029284	Downregulated	89299	6	-	45247968	45271550	TCONS_00181899	29	4846	XLOC_049215	NPHS1	NPHS1 adhesion molecule, nephrin [Source:VGNC Symbol;Acc:VGNC:90849]
ENSSSCG00000029284	Downregulated	89300	6	-	45247968	45271550	TCONS_00181900	29	4846	XLOC_049215	NPHS1	NPHS1 adhesion molecule, nephrin [Source:VGNC Symbol;Acc:VGNC:90849]
ENSSSCG00000029284	Downregulated	89301	6	-	45247968	45271550	TCONS_00181901	29	4846	XLOC_049215	NPHS1	NPHS1 adhesion molecule, nephrin [Source:VGNC Symbol;Acc:VGNC:90849]
ENSSSCG00000029284	Downregulated	89302	6	-	45247968	45271550	TCONS_00181902	29	4846	XLOC_049215	NPHS1	NPHS1 adhesion molecule, nephrin [Source:VGNC Symbol;Acc:VGNC:90849]
ENSSSCG00000029284	Downregulated	89303	6	+	45248071	45264050	TCONS_00171076	14	2520	XLOC_046426	NPHS1	NPHS1 adhesion molecule, nephrin [Source:VGNC Symbol;Acc:VGNC:90849]
ENSSSCG00000029284	Downregulated	89304	6	+	45248071	45264191	TCONS_00171077	14	3066	XLOC_046426	NPHS1	NPHS1 adhesion molecule, nephrin [Source:VGNC Symbol;Acc:VGNC:90849]
ENSSSCG00000029284	Downregulated	89305	6	-	45248317	45271550	TCONS_00181903	28	4377	XLOC_049215	NPHS1	NPHS1 adhesion molecule, nephrin [Source:VGNC Symbol;Acc:VGNC:90849]
ENSSSCG00000029284	Downregulated	89306	6	-	45248317	45271550	TCONS_00181904	29	4497	XLOC_049215	NPHS1	NPHS1 adhesion molecule, nephrin [Source:VGNC Symbol;Acc:VGNC:90849]
ENSSSCG00000033669	Downregulated	63160	4	-	62569885	62601508	TCONS_00152001	7	3948	XLOC_041327	RDH10	retinol dehydrogenase 10 [Source:VGNC Symbol;Acc:VGNC:92190]
ENSSSCG00000033669	Downregulated	63162	4	+	62569930	62576309	TCONS_00145356	4	3184	XLOC_039531	RDH10	retinol dehydrogenase 10 [Source:VGNC Symbol;Acc:VGNC:92190]
ENSSSCG00000033669	Downregulated	63163	4	+	62569930	62599122	TCONS_00145357	6	3490	XLOC_039531	RDH10	retinol dehydrogenase 10 [Source:VGNC Symbol;Acc:VGNC:92190]
ENSSSCG00000033669	Downregulated	63164	4	+	62569930	62600607	TCONS_00145358	6	3607	XLOC_039531	RDH10	retinol dehydrogenase 10 [Source:VGNC Symbol;Acc:VGNC:92190]
ENSSSCG00000033669	Downregulated	63165	4	-	62571093	62601508	TCONS_00152003	7	2740	XLOC_041327	RDH10	retinol dehydrogenase 10 [Source:VGNC Symbol;Acc:VGNC:92190]
ENSSSCG00000032433	Downregulated	226975	X	+	19507998	19563296	TCONS_00231237	4	6767	XLOC_063892	PTCHD1	patched domain containing 1 [Source:VGNC Symbol;Acc:VGNC:91942]
ENSSSCG00000032433	Downregulated	226976	X	+	19507998	19563296	TCONS_00231238	3	6895	XLOC_063892	PTCHD1	patched domain containing 1 [Source:VGNC Symbol;Acc:VGNC:91942]
ENSSSCG00000032433	Downregulated	226977	X	-	19558017	19563740	TCONS_00235177	1	5724	XLOC_065076	PTCHD1	patched domain containing 1 [Source:VGNC Symbol;Acc:VGNC:91942]
ENSSSCG00000006590	Downregulated	67271	4	-	96209543	96210603	TCONS_00154043	3	513	XLOC_041790	S100A8	S100 calcium binding protein A8 [Source:VGNC Symbol;Acc:VGNC:92546]
ENSSSCG00000006590	Downregulated	67272	4	+	96209551	96210602	TCONS_00147419	3	504	XLOC_040005	S100A8	S100 calcium binding protein A8 [Source:VGNC Symbol;Acc:VGNC:92546]
ENSSSCG00000021557	Downregulated	45714	3	+	18351220	18354653	TCONS_00128402	8	1127	XLOC_034994	SULT1A3	sulfotransferase family 1A member 3 [Source:NCBI gene (formerly Entrezgene);Acc:396640]
ENSSSCG00000021557	Downregulated	45715	3	+	18351220	18354653	TCONS_00128403	8	1159	XLOC_034994	SULT1A3	sulfotransferase family 1A member 3 [Source:NCBI gene (formerly Entrezgene);Acc:396640]
ENSSSCG00000021557	Downregulated	45716	3	+	18351223	18354653	TCONS_00128404	7	954	XLOC_034994	SULT1A3	sulfotransferase family 1A member 3 [Source:NCBI gene (formerly Entrezgene);Acc:396640]
ENSSSCG00000021557	Downregulated	45717	3	+	18351235	18354653	TCONS_00128405	8	1108	XLOC_034994	SULT1A3	sulfotransferase family 1A member 3 [Source:NCBI gene (formerly Entrezgene);Acc:396640]
ENSSSCG00000021557	Downregulated	45718	3	+	18351621	18354651	TCONS_00128406	8	1203	XLOC_034994	SULT1A3	sulfotransferase family 1A member 3 [Source:NCBI gene (formerly Entrezgene);Acc:396640]
ENSSSCG00000021557	Downregulated	45719	3	+	18351621	18354653	TCONS_00128407	8	1237	XLOC_034994	SULT1A3	sulfotransferase family 1A member 3 [Source:NCBI gene (formerly Entrezgene);Acc:396640]
ENSSSCG00000021557	Downregulated	45720	3	+	18351844	18354653	TCONS_00128408	8	1157	XLOC_034994	SULT1A3	sulfotransferase family 1A member 3 [Source:NCBI gene (formerly Entrezgene);Acc:396640]
ENSSSCG00000021557	Downregulated	45721	3	+	18351844	18354653	TCONS_00128409	8	1125	XLOC_034994	SULT1A3	sulfotransferase family 1A member 3 [Source:NCBI gene (formerly Entrezgene);Acc:396640]
ENSSSCG00000021557	Downregulated	45722	3	+	18353666	18354653	TCONS_00128410	3	468	XLOC_034994	SULT1A3	sulfotransferase family 1A member 3 [Source:NCBI gene (formerly Entrezgene);Acc:396640]
ENSSSCG00000007112	Downregulated	215602	17	+	29422101	29436680	TCONS_00095281	5	7169	XLOC_026193	PAX1	paired box 1 [Source:VGNC Symbol;Acc:VGNC:96467]
ENSSSCG00000007112	Downregulated	215603	17	+	29422129	29431990	TCONS_00095282	5	2451	XLOC_026193	PAX1	paired box 1 [Source:VGNC Symbol;Acc:VGNC:96467]
ENSSSCG00000007112	Downregulated	215604	17	-	29430999	29437863	TCONS_00099106	1	6865	XLOC_027199	PAX1	paired box 1 [Source:VGNC Symbol;Acc:VGNC:96467]
ENSSSCG00000029249	Downregulated	83778	5	-	103013798	103177471	TCONS_00168327	29	8628	XLOC_045701	NAV3	neuron navigator 3 [Source:VGNC Symbol;Acc:VGNC:90589]
ENSSSCG00000029249	Downregulated	83779	5	-	103013798	103177471	TCONS_00168328	30	8649	XLOC_045701	NAV3	neuron navigator 3 [Source:VGNC Symbol;Acc:VGNC:90589]
ENSSSCG00000029249	Downregulated	83780	5	-	103013798	103177471	TCONS_00168329	31	8715	XLOC_045701	NAV3	neuron navigator 3 [Source:VGNC Symbol;Acc:VGNC:90589]
ENSSSCG00000029249	Downregulated	83781	5	-	103013798	103177471	TCONS_00168330	32	8757	XLOC_045701	NAV3	neuron navigator 3 [Source:VGNC Symbol;Acc:VGNC:90589]
ENSSSCG00000029249	Downregulated	83782	5	-	103013798	103368021	TCONS_00168331	37	9950	XLOC_045701	NAV3	neuron navigator 3 [Source:VGNC Symbol;Acc:VGNC:90589]
ENSSSCG00000029249	Downregulated	83783	5	-	103013798	103368021	TCONS_00168332	36	9881	XLOC_045701	NAV3	neuron navigator 3 [Source:VGNC Symbol;Acc:VGNC:90589]
ENSSSCG00000029249	Downregulated	83784	5	-	103013798	103368021	TCONS_00168333	37	9923	XLOC_045701	NAV3	neuron navigator 3 [Source:VGNC Symbol;Acc:VGNC:90589]
ENSSSCG00000029249	Downregulated	83785	5	-	103013798	103368021	TCONS_00168334	38	9971	XLOC_045701	NAV3	neuron navigator 3 [Source:VGNC Symbol;Acc:VGNC:90589]
ENSSSCG00000029249	Downregulated	83786	5	-	103013798	103368021	TCONS_00168335	37	9923	XLOC_045701	NAV3	neuron navigator 3 [Source:VGNC Symbol;Acc:VGNC:90589]
ENSSSCG00000029249	Downregulated	83787	5	-	103013798	103368021	TCONS_00168336	37	9923	XLOC_045701	NAV3	neuron navigator 3 [Source:VGNC Symbol;Acc:VGNC:90589]
ENSSSCG00000029249	Downregulated	83788	5	-	103013798	103368021	TCONS_00168337	38	9944	XLOC_045701	NAV3	neuron navigator 3 [Source:VGNC Symbol;Acc:VGNC:90589]
ENSSSCG00000029249	Downregulated	83789	5	-	103013798	103368021	TCONS_00168338	37	9923	XLOC_045701	NAV3	neuron navigator 3 [Source:VGNC Symbol;Acc:VGNC:90589]
ENSSSCG00000029249	Downregulated	83790	5	-	103013798	103368021	TCONS_00168339	38	9971	XLOC_045701	NAV3	neuron navigator 3 [Source:VGNC Symbol;Acc:VGNC:90589]
ENSSSCG00000029249	Downregulated	83791	5	-	103013798	103368021	TCONS_00168340	40	10079	XLOC_045701	NAV3	neuron navigator 3 [Source:VGNC Symbol;Acc:VGNC:90589]
ENSSSCG00000029249	Downregulated	83792	5	-	103013798	103368021	TCONS_00168341	38	9992	XLOC_045701	NAV3	neuron navigator 3 [Source:VGNC Symbol;Acc:VGNC:90589]
ENSSSCG00000029249	Downregulated	83793	5	-	103013798	103368021	TCONS_00168342	38	9944	XLOC_045701	NAV3	neuron navigator 3 [Source:VGNC Symbol;Acc:VGNC:90589]
ENSSSCG00000029249	Downregulated	83794	5	-	103013798	103368021	TCONS_00168343	39	10013	XLOC_045701	NAV3	neuron navigator 3 [Source:VGNC Symbol;Acc:VGNC:90589]
ENSSSCG00000029249	Downregulated	83795	5	-	103013806	103177471	TCONS_00168344	30	8662	XLOC_045701	NAV3	neuron navigator 3 [Source:VGNC Symbol;Acc:VGNC:90589]
ENSSSCG00000029249	Downregulated	83796	5	+	103013925	103021178	TCONS_00162351	2	2694	XLOC_044037	NAV3	neuron navigator 3 [Source:VGNC Symbol;Acc:VGNC:90589]
ENSSSCG00000048589	Downregulated	190244	14	-	56609138	56611227	TCONS_00074984	2	602	XLOC_020277	ENSSSCG00000048589
ENSSSCG00000048589	Downregulated	190245	14	-	56609151	56614423	TCONS_00074985	2	3085	XLOC_020277	ENSSSCG00000048589
ENSSSCG00000048589	Downregulated	190246	14	-	56611483	56614348	TCONS_00074986	3	876	XLOC_020277	ENSSSCG00000048589
ENSSSCG00000008823	Downregulated	122334	8	+	38378798	38386195	TCONS_00205502	3	2595	XLOC_055560	SLC10A4	solute carrier family 10 member 4 [Source:VGNC Symbol;Acc:VGNC:92917]
ENSSSCG00000006183	Downregulated	63195	4	+	62756342	62791528	TCONS_00145376	6	3055	XLOC_039535	SBSPON	somatomedin B and thrombospondin type 1 domain containing [Source:VGNC Symbol;Acc:VGNC:92599]
ENSSSCG00000006183	Downregulated	63196	4	+	62756342	62791613	TCONS_00145377	6	3179	XLOC_039535	SBSPON	somatomedin B and thrombospondin type 1 domain containing [Source:VGNC Symbol;Acc:VGNC:92599]
ENSSSCG00000006183	Downregulated	63197	4	+	62756342	62791615	TCONS_00145378	6	3142	XLOC_039535	SBSPON	somatomedin B and thrombospondin type 1 domain containing [Source:VGNC Symbol;Acc:VGNC:92599]
ENSSSCG00000006183	Downregulated	63198	4	+	62756342	62792968	TCONS_00145379	8	3188	XLOC_039535	SBSPON	somatomedin B and thrombospondin type 1 domain containing [Source:VGNC Symbol;Acc:VGNC:92599]
ENSSSCG00000006183	Downregulated	63199	4	-	62769820	62791891	TCONS_00152016	5	2484	XLOC_041330	SBSPON	somatomedin B and thrombospondin type 1 domain containing [Source:VGNC Symbol;Acc:VGNC:92599]
ENSSSCG00000006183	Downregulated	63200	4	-	62769820	62791900	TCONS_00152017	4	3163	XLOC_041330	SBSPON	somatomedin B and thrombospondin type 1 domain containing [Source:VGNC Symbol;Acc:VGNC:92599]
ENSSSCG00000008984	Downregulated	124791	8	+	72409708	72443219	TCONS_00206668	9	2670	XLOC_055915	ENSSSCG00000008984
ENSSSCG00000008984	Downregulated	124792	8	+	72409708	72443931	TCONS_00206669	8	3846	XLOC_055915	ENSSSCG00000008984
ENSSSCG00000008984	Downregulated	124793	8	+	72409708	72443931	TCONS_00206670	9	3447	XLOC_055915	ENSSSCG00000008984
ENSSSCG00000008984	Downregulated	124794	8	+	72409708	72443931	TCONS_00206671	9	3382	XLOC_055915	ENSSSCG00000008984
ENSSSCG00000008984	Downregulated	124795	8	-	72422711	72444012	TCONS_00211427	5	2748	XLOC_057280	ENSSSCG00000008984
ENSSSCG00000008984	Downregulated	124796	8	-	72422711	72444127	TCONS_00211428	6	2694	XLOC_057280	ENSSSCG00000008984
ENSSSCG00000008984	Downregulated	124797	8	-	72424507	72432537	TCONS_00211429	3	642	XLOC_057280	ENSSSCG00000008984
ENSSSCG00000008984	Downregulated	124798	8	+	72432601	72443931	TCONS_00206672	4	1338	XLOC_055915	ENSSSCG00000008984
ENSSSCG00000008984	Downregulated	124799	8	-	72438660	72443853	TCONS_00211430	3	1768	XLOC_057280	ENSSSCG00000008984
ENSSSCG00000008984	Downregulated	124800	8	+	72438675	72443931	TCONS_00206673	4	1371	XLOC_055915	ENSSSCG00000008984
ENSSSCG00000042878	Downregulated	10662	1	-	132034113	132218036	TCONS_00016371	6	3121	XLOC_004491	ENSSSCG00000042878
ENSSSCG00000042878	Downregulated	10674	1	-	132144322	132307473	TCONS_00016378	3	1406	XLOC_004491	ENSSSCG00000042878
ENSSSCG00000042878	Downregulated	10675	1	-	132187909	132307473	TCONS_00016379	2	3557	XLOC_004491	ENSSSCG00000042878
ENSSSCG00000042878	Downregulated	10676	1	-	132187909	132307473	TCONS_00016380	3	3705	XLOC_004491	ENSSSCG00000042878
ENSSSCG00000042878	Downregulated	10677	1	-	132189015	132306651	TCONS_00016381	2	1629	XLOC_004491	ENSSSCG00000042878
ENSSSCG00000042878	Downregulated	10678	1	-	132190182	132218036	TCONS_00016382	2	645	XLOC_004491	ENSSSCG00000042878
ENSSSCG00000042878	Downregulated	10679	1	-	132190182	132218036	TCONS_00016383	3	773	XLOC_004491	ENSSSCG00000042878
ENSSSCG00000003483	Downregulated	95750	6	-	75935853	75963622	TCONS_00185039	15	1706	XLOC_050062	PADI4	peptidyl arginine deiminase 4 [Source:VGNC Symbol;Acc:VGNC:98175]
ENSSSCG00000003483	Downregulated	95751	6	-	75935853	75966254	TCONS_00185040	15	2231	XLOC_050062	PADI4	peptidyl arginine deiminase 4 [Source:VGNC Symbol;Acc:VGNC:98175]
ENSSSCG00000003483	Downregulated	95752	6	-	75935853	75966254	TCONS_00185041	15	2163	XLOC_050062	PADI4	peptidyl arginine deiminase 4 [Source:VGNC Symbol;Acc:VGNC:98175]
ENSSSCG00000003483	Downregulated	95753	6	-	75935853	75966275	TCONS_00185042	16	2323	XLOC_050062	PADI4	peptidyl arginine deiminase 4 [Source:VGNC Symbol;Acc:VGNC:98175]
ENSSSCG00000003483	Downregulated	95754	6	+	75935861	75966322	TCONS_00174381	15	2291	XLOC_047268	PADI4	peptidyl arginine deiminase 4 [Source:VGNC Symbol;Acc:VGNC:98175]
ENSSSCG00000003483	Downregulated	95755	6	+	75935880	75966322	TCONS_00174382	16	2343	XLOC_047268	PADI4	peptidyl arginine deiminase 4 [Source:VGNC Symbol;Acc:VGNC:98175]
ENSSSCG00000003483	Downregulated	95756	6	+	75935882	75966322	TCONS_00174383	14	2128	XLOC_047268	PADI4	peptidyl arginine deiminase 4 [Source:VGNC Symbol;Acc:VGNC:98175]
ENSSSCG00000003483	Downregulated	95757	6	+	75935903	75962747	TCONS_00174384	12	1309	XLOC_047268	PADI4	peptidyl arginine deiminase 4 [Source:VGNC Symbol;Acc:VGNC:98175]
ENSSSCG00000003483	Downregulated	95758	6	+	75935903	75966169	TCONS_00174385	16	2170	XLOC_047268	PADI4	peptidyl arginine deiminase 4 [Source:VGNC Symbol;Acc:VGNC:98175]
ENSSSCG00000003483	Downregulated	95759	6	+	75935903	75966322	TCONS_00174386	14	2364	XLOC_047268	PADI4	peptidyl arginine deiminase 4 [Source:VGNC Symbol;Acc:VGNC:98175]
ENSSSCG00000003483	Downregulated	95760	6	+	75935903	75966322	TCONS_00174387	15	2222	XLOC_047268	PADI4	peptidyl arginine deiminase 4 [Source:VGNC Symbol;Acc:VGNC:98175]
ENSSSCG00000003483	Downregulated	95761	6	+	75935903	75966322	TCONS_00174388	15	2212	XLOC_047268	PADI4	peptidyl arginine deiminase 4 [Source:VGNC Symbol;Acc:VGNC:98175]
ENSSSCG00000003483	Downregulated	95762	6	+	75935903	75966322	TCONS_00174389	15	2249	XLOC_047268	PADI4	peptidyl arginine deiminase 4 [Source:VGNC Symbol;Acc:VGNC:98175]
ENSSSCG00000003483	Downregulated	95763	6	+	75935903	75966322	TCONS_00174390	15	2252	XLOC_047268	PADI4	peptidyl arginine deiminase 4 [Source:VGNC Symbol;Acc:VGNC:98175]
ENSSSCG00000003483	Downregulated	95764	6	+	75935903	75966322	TCONS_00174391	16	2403	XLOC_047268	PADI4	peptidyl arginine deiminase 4 [Source:VGNC Symbol;Acc:VGNC:98175]
ENSSSCG00000003483	Downregulated	95765	6	-	75944810	75966254	TCONS_00185043	12	1607	XLOC_050062	PADI4	peptidyl arginine deiminase 4 [Source:VGNC Symbol;Acc:VGNC:98175]
ENSSSCG00000003483	Downregulated	95766	6	-	75954874	75966254	TCONS_00185044	10	1417	XLOC_050062	PADI4	peptidyl arginine deiminase 4 [Source:VGNC Symbol;Acc:VGNC:98175]
ENSSSCG00000003483	Downregulated	95767	6	-	75962409	75966254	TCONS_00185045	4	1032	XLOC_050062	PADI4	peptidyl arginine deiminase 4 [Source:VGNC Symbol;Acc:VGNC:98175]
ENSSSCG00000039318	Downregulated	164695	12	+	58123662	58168407	TCONS_00040089	3	4995	XLOC_011305	HS3ST3B1	heparan sulfate-glucosamine 3-sulfotransferase 3B1 [Source:VGNC Symbol;Acc:VGNC:99003]
ENSSSCG00000039318	Downregulated	164696	12	+	58124657	58168407	TCONS_00040090	3	5307	XLOC_011305	HS3ST3B1	heparan sulfate-glucosamine 3-sulfotransferase 3B1 [Source:VGNC Symbol;Acc:VGNC:99003]
ENSSSCG00000039318	Downregulated	164697	12	+	58126044	58168407	TCONS_00040091	2	5365	XLOC_011305	HS3ST3B1	heparan sulfate-glucosamine 3-sulfotransferase 3B1 [Source:VGNC Symbol;Acc:VGNC:99003]
ENSSSCG00000039318	Downregulated	164698	12	+	58147299	58168407	TCONS_00040092	2	3846	XLOC_011305	HS3ST3B1	heparan sulfate-glucosamine 3-sulfotransferase 3B1 [Source:VGNC Symbol;Acc:VGNC:99003]
ENSSSCG00000039318	Downregulated	164699	12	-	58165139	58168434	TCONS_00046040	1	3296	XLOC_012812	HS3ST3B1	heparan sulfate-glucosamine 3-sulfotransferase 3B1 [Source:VGNC Symbol;Acc:VGNC:99003]
ENSSSCG00000045069	Downregulated	107411	7	-	16885827	16891770	TCONS_00197901	2	1859	XLOC_053527	ENSSSCG00000045069
ENSSSCG00000045069	Downregulated	107412	7	-	16885827	16891770	TCONS_00197902	3	3253	XLOC_053527	ENSSSCG00000045069
ENSSSCG00000045069	Downregulated	107413	7	-	16885827	16891770	TCONS_00197903	2	3647	XLOC_053527	ENSSSCG00000045069
ENSSSCG00000045069	Downregulated	107414	7	-	16885827	16895413	TCONS_00197904	4	4385	XLOC_053527	ENSSSCG00000045069
ENSSSCG00000045069	Downregulated	107415	7	-	16885827	16895430	TCONS_00197905	3	4936	XLOC_053527	ENSSSCG00000045069
ENSSSCG00000045069	Downregulated	107416	7	-	16885827	16896420	TCONS_00197906	3	3692	XLOC_053527	ENSSSCG00000045069
ENSSSCG00000000991	Downregulated	105806	7	+	663884	666755	TCONS_00190281	1	2872	XLOC_051335	FOXQ1	forkhead box Q1 [Source:VGNC Symbol;Acc:VGNC:88225]
ENSSSCG00000000991	Downregulated	105807	7	+	663963	666755	TCONS_00190282	2	2146	XLOC_051335	FOXQ1	forkhead box Q1 [Source:VGNC Symbol;Acc:VGNC:88225]
ENSSSCG00000000991	Downregulated	105808	7	+	664373	665563	TCONS_00190283	1	1191	XLOC_051335	FOXQ1	forkhead box Q1 [Source:VGNC Symbol;Acc:VGNC:88225]
ENSSSCG00000000991	Downregulated	105809	7	-	665467	666561	TCONS_00197094	2	448	XLOC_053259	FOXQ1	forkhead box Q1 [Source:VGNC Symbol;Acc:VGNC:88225]
ENSSSCG00000000991	Downregulated	105810	7	-	665467	666586	TCONS_00197095	2	473	XLOC_053259	FOXQ1	forkhead box Q1 [Source:VGNC Symbol;Acc:VGNC:88225]
ENSSSCG00000000991	Downregulated	105811	7	-	665467	666656	TCONS_00197096	2	1050	XLOC_053259	FOXQ1	forkhead box Q1 [Source:VGNC Symbol;Acc:VGNC:88225]
ENSSSCG00000043196	Downregulated	158165	12	+	21405064	21407862	TCONS_00036796	2	1726	XLOC_010573	ENSSSCG00000043196
ENSSSCG00000039245	Downregulated	105582	6	+	170506426	170546939	TCONS_00179106	10	6129	XLOC_048471	RIMS3	regulating synaptic membrane exocytosis 3 [Source:VGNC Symbol;Acc:VGNC:92310]
ENSSSCG00000039245	Downregulated	105583	6	+	170506426	170546939	TCONS_00179107	10	3927	XLOC_048471	RIMS3	regulating synaptic membrane exocytosis 3 [Source:VGNC Symbol;Acc:VGNC:92310]
ENSSSCG00000039245	Downregulated	105584	6	+	170506426	170546939	TCONS_00179108	9	6019	XLOC_048471	RIMS3	regulating synaptic membrane exocytosis 3 [Source:VGNC Symbol;Acc:VGNC:92310]
ENSSSCG00000039245	Downregulated	105585	6	+	170506426	170546939	TCONS_00179109	10	6120	XLOC_048471	RIMS3	regulating synaptic membrane exocytosis 3 [Source:VGNC Symbol;Acc:VGNC:92310]
ENSSSCG00000039245	Downregulated	105586	6	+	170506426	170546939	TCONS_00179110	11	4028	XLOC_048471	RIMS3	regulating synaptic membrane exocytosis 3 [Source:VGNC Symbol;Acc:VGNC:92310]
ENSSSCG00000039245	Downregulated	105587	6	+	170506441	170545188	TCONS_00179111	8	5112	XLOC_048471	RIMS3	regulating synaptic membrane exocytosis 3 [Source:VGNC Symbol;Acc:VGNC:92310]
ENSSSCG00000039245	Downregulated	105588	6	-	170535584	170540261	TCONS_00190120	4	419	XLOC_051270	RIMS3	regulating synaptic membrane exocytosis 3 [Source:VGNC Symbol;Acc:VGNC:92310]
ENSSSCG00000039245	Downregulated	105589	6	-	170546023	170546649	TCONS_00190121	1	627	XLOC_051271	RIMS3	regulating synaptic membrane exocytosis 3 [Source:VGNC Symbol;Acc:VGNC:92310]
ENSSSCG00000004663	Downregulated	9047	1	-	123987519	124042165	TCONS_00015484	19	5897	XLOC_004362	SEMA6D	semaphorin 6D [Source:VGNC Symbol;Acc:VGNC:92711]
ENSSSCG00000004663	Downregulated	9048	1	-	123987519	124042165	TCONS_00015485	19	6032	XLOC_004362	SEMA6D	semaphorin 6D [Source:VGNC Symbol;Acc:VGNC:92711]
ENSSSCG00000004663	Downregulated	9049	1	-	123987519	124042165	TCONS_00015486	19	5885	XLOC_004362	SEMA6D	semaphorin 6D [Source:VGNC Symbol;Acc:VGNC:92711]
ENSSSCG00000004663	Downregulated	9050	1	-	123987519	124042165	TCONS_00015487	17	5672	XLOC_004362	SEMA6D	semaphorin 6D [Source:VGNC Symbol;Acc:VGNC:92711]
ENSSSCG00000004663	Downregulated	9051	1	-	123987519	124042165	TCONS_00015488	18	5729	XLOC_004362	SEMA6D	semaphorin 6D [Source:VGNC Symbol;Acc:VGNC:92711]
ENSSSCG00000004663	Downregulated	9052	1	-	123987519	124042165	TCONS_00015489	17	5819	XLOC_004362	SEMA6D	semaphorin 6D [Source:VGNC Symbol;Acc:VGNC:92711]
ENSSSCG00000004663	Downregulated	9053	1	-	123987519	124042165	TCONS_00015490	19	5885	XLOC_004362	SEMA6D	semaphorin 6D [Source:VGNC Symbol;Acc:VGNC:92711]
ENSSSCG00000004663	Downregulated	9054	1	-	123987519	124043344	TCONS_00015491	20	6378	XLOC_004362	SEMA6D	semaphorin 6D [Source:VGNC Symbol;Acc:VGNC:92711]
ENSSSCG00000004663	Downregulated	9055	1	-	123987519	124043344	TCONS_00015492	19	6120	XLOC_004362	SEMA6D	semaphorin 6D [Source:VGNC Symbol;Acc:VGNC:92711]
ENSSSCG00000004663	Downregulated	9056	1	-	123987519	124043344	TCONS_00015493	19	5973	XLOC_004362	SEMA6D	semaphorin 6D [Source:VGNC Symbol;Acc:VGNC:92711]
ENSSSCG00000004663	Downregulated	9057	1	-	123987519	124043344	TCONS_00015494	18	5904	XLOC_004362	SEMA6D	semaphorin 6D [Source:VGNC Symbol;Acc:VGNC:92711]
ENSSSCG00000004663	Downregulated	9058	1	-	123987519	124043344	TCONS_00015495	18	6018	XLOC_004362	SEMA6D	semaphorin 6D [Source:VGNC Symbol;Acc:VGNC:92711]
ENSSSCG00000004663	Downregulated	9059	1	-	123987519	124043344	TCONS_00015496	19	6012	XLOC_004362	SEMA6D	semaphorin 6D [Source:VGNC Symbol;Acc:VGNC:92711]
ENSSSCG00000004663	Downregulated	9060	1	-	123987519	124043344	TCONS_00015497	19	5961	XLOC_004362	SEMA6D	semaphorin 6D [Source:VGNC Symbol;Acc:VGNC:92711]
ENSSSCG00000004663	Downregulated	9061	1	-	123987519	124043344	TCONS_00015498	19	6242	XLOC_004362	SEMA6D	semaphorin 6D [Source:VGNC Symbol;Acc:VGNC:92711]
ENSSSCG00000004663	Downregulated	9062	1	-	123987519	124043344	TCONS_00015499	18	5805	XLOC_004362	SEMA6D	semaphorin 6D [Source:VGNC Symbol;Acc:VGNC:92711]
ENSSSCG00000004663	Downregulated	9063	1	-	123987519	124307241	TCONS_00015500	18	5512	XLOC_004362	SEMA6D	semaphorin 6D [Source:VGNC Symbol;Acc:VGNC:92711]
ENSSSCG00000004663	Downregulated	9064	1	-	123987519	124307241	TCONS_00015501	19	5595	XLOC_004362	SEMA6D	semaphorin 6D [Source:VGNC Symbol;Acc:VGNC:92711]
ENSSSCG00000004663	Downregulated	9065	1	-	123987519	124307241	TCONS_00015502	20	5776	XLOC_004362	SEMA6D	semaphorin 6D [Source:VGNC Symbol;Acc:VGNC:92711]
ENSSSCG00000004663	Downregulated	9066	1	-	123987519	124307241	TCONS_00015503	20	5725	XLOC_004362	SEMA6D	semaphorin 6D [Source:VGNC Symbol;Acc:VGNC:92711]
ENSSSCG00000004663	Downregulated	9067	1	-	123987519	124307241	TCONS_00015504	19	5569	XLOC_004362	SEMA6D	semaphorin 6D [Source:VGNC Symbol;Acc:VGNC:92711]
ENSSSCG00000004663	Downregulated	9068	1	-	123987519	124307241	TCONS_00015505	21	5967	XLOC_004362	SEMA6D	semaphorin 6D [Source:VGNC Symbol;Acc:VGNC:92711]
ENSSSCG00000004663	Downregulated	9069	1	-	123987519	124307241	TCONS_00015506	19	5854	XLOC_004362	SEMA6D	semaphorin 6D [Source:VGNC Symbol;Acc:VGNC:92711]
ENSSSCG00000004663	Downregulated	9070	1	-	123987519	124307241	TCONS_00015507	20	5923	XLOC_004362	SEMA6D	semaphorin 6D [Source:VGNC Symbol;Acc:VGNC:92711]
ENSSSCG00000004663	Downregulated	9071	1	-	123987519	124307241	TCONS_00015508	18	5659	XLOC_004362	SEMA6D	semaphorin 6D [Source:VGNC Symbol;Acc:VGNC:92711]
ENSSSCG00000004663	Downregulated	9072	1	-	123987519	124307241	TCONS_00015509	19	5668	XLOC_004362	SEMA6D	semaphorin 6D [Source:VGNC Symbol;Acc:VGNC:92711]
ENSSSCG00000004663	Downregulated	9073	1	-	123987519	124307241	TCONS_00015510	19	5707	XLOC_004362	SEMA6D	semaphorin 6D [Source:VGNC Symbol;Acc:VGNC:92711]
ENSSSCG00000004663	Downregulated	9074	1	-	123987519	124307241	TCONS_00015511	20	5652	XLOC_004362	SEMA6D	semaphorin 6D [Source:VGNC Symbol;Acc:VGNC:92711]
ENSSSCG00000004663	Downregulated	9075	1	-	123987519	124307241	TCONS_00015512	20	5764	XLOC_004362	SEMA6D	semaphorin 6D [Source:VGNC Symbol;Acc:VGNC:92711]
ENSSSCG00000004663	Downregulated	9076	1	-	123987530	124043311	TCONS_00015513	18	6007	XLOC_004362	SEMA6D	semaphorin 6D [Source:VGNC Symbol;Acc:VGNC:92711]
ENSSSCG00000004663	Downregulated	9077	1	-	123987530	124043344	TCONS_00015514	18	5941	XLOC_004362	SEMA6D	semaphorin 6D [Source:VGNC Symbol;Acc:VGNC:92711]
ENSSSCG00000004663	Downregulated	9078	1	-	123987534	124042165	TCONS_00015515	18	5999	XLOC_004362	SEMA6D	semaphorin 6D [Source:VGNC Symbol;Acc:VGNC:92711]
ENSSSCG00000004663	Downregulated	9079	1	-	123987534	124043269	TCONS_00015516	19	6018	XLOC_004362	SEMA6D	semaphorin 6D [Source:VGNC Symbol;Acc:VGNC:92711]
ENSSSCG00000004663	Downregulated	9080	1	+	123987588	123994724	TCONS_00004491	3	3897	XLOC_001278	SEMA6D	semaphorin 6D [Source:VGNC Symbol;Acc:VGNC:92711]
ENSSSCG00000004663	Downregulated	9081	1	+	123987588	123996774	TCONS_00004492	7	4229	XLOC_001278	SEMA6D	semaphorin 6D [Source:VGNC Symbol;Acc:VGNC:92711]
ENSSSCG00000004663	Downregulated	9082	1	+	123987606	123993190	TCONS_00004493	2	3716	XLOC_001278	SEMA6D	semaphorin 6D [Source:VGNC Symbol;Acc:VGNC:92711]
ENSSSCG00000004663	Downregulated	9083	1	+	123987606	123993809	TCONS_00004494	2	3736	XLOC_001278	SEMA6D	semaphorin 6D [Source:VGNC Symbol;Acc:VGNC:92711]
ENSSSCG00000004663	Downregulated	9084	1	+	123987606	123995169	TCONS_00004495	2	3722	XLOC_001278	SEMA6D	semaphorin 6D [Source:VGNC Symbol;Acc:VGNC:92711]
ENSSSCG00000004663	Downregulated	9085	1	-	123988901	124307240	TCONS_00015517	21	4584	XLOC_004362	SEMA6D	semaphorin 6D [Source:VGNC Symbol;Acc:VGNC:92711]
ENSSSCG00000004663	Downregulated	9086	1	-	123989592	124043311	TCONS_00015518	18	3912	XLOC_004362	SEMA6D	semaphorin 6D [Source:VGNC Symbol;Acc:VGNC:92711]
ENSSSCG00000004663	Downregulated	9087	1	-	123989592	124307241	TCONS_00015519	20	3850	XLOC_004362	SEMA6D	semaphorin 6D [Source:VGNC Symbol;Acc:VGNC:92711]
ENSSSCG00000016613	Downregulated	223272	18	+	24938298	25039346	TCONS_00102857	25	6068	XLOC_028245	AASS	aminoadipate-semialdehyde synthase [Source:VGNC Symbol;Acc:VGNC:84944]
ENSSSCG00000016613	Downregulated	223273	18	-	24938353	25039175	TCONS_00105426	24	5719	XLOC_028987	AASS	aminoadipate-semialdehyde synthase [Source:VGNC Symbol;Acc:VGNC:84944]
ENSSSCG00000016613	Downregulated	223274	18	-	24938353	25039175	TCONS_00105427	25	5842	XLOC_028987	AASS	aminoadipate-semialdehyde synthase [Source:VGNC Symbol;Acc:VGNC:84944]
ENSSSCG00000016613	Downregulated	223275	18	+	24938469	25039346	TCONS_00102858	25	5913	XLOC_028245	AASS	aminoadipate-semialdehyde synthase [Source:VGNC Symbol;Acc:VGNC:84944]
ENSSSCG00000016613	Downregulated	223276	18	+	24938715	25039346	TCONS_00102859	25	5876	XLOC_028245	AASS	aminoadipate-semialdehyde synthase [Source:VGNC Symbol;Acc:VGNC:84944]
ENSSSCG00000016613	Downregulated	223277	18	+	24938780	25039346	TCONS_00102860	22	5392	XLOC_028245	AASS	aminoadipate-semialdehyde synthase [Source:VGNC Symbol;Acc:VGNC:84944]
ENSSSCG00000016613	Downregulated	223278	18	+	24938780	25039346	TCONS_00102861	23	5599	XLOC_028245	AASS	aminoadipate-semialdehyde synthase [Source:VGNC Symbol;Acc:VGNC:84944]
ENSSSCG00000016613	Downregulated	223279	18	+	24938886	25039346	TCONS_00102862	23	5470	XLOC_028245	AASS	aminoadipate-semialdehyde synthase [Source:VGNC Symbol;Acc:VGNC:84944]
ENSSSCG00000016613	Downregulated	223280	18	+	24974816	25039196	TCONS_00102863	25	5602	XLOC_028245	AASS	aminoadipate-semialdehyde synthase [Source:VGNC Symbol;Acc:VGNC:84944]
ENSSSCG00000016613	Downregulated	223281	18	+	24974816	25039346	TCONS_00102864	24	5614	XLOC_028245	AASS	aminoadipate-semialdehyde synthase [Source:VGNC Symbol;Acc:VGNC:84944]
ENSSSCG00000016613	Downregulated	223282	18	+	24974816	25039346	TCONS_00102865	23	5540	XLOC_028245	AASS	aminoadipate-semialdehyde synthase [Source:VGNC Symbol;Acc:VGNC:84944]
ENSSSCG00000016613	Downregulated	223283	18	+	24974816	25039346	TCONS_00102866	24	5629	XLOC_028245	AASS	aminoadipate-semialdehyde synthase [Source:VGNC Symbol;Acc:VGNC:84944]
ENSSSCG00000016613	Downregulated	223284	18	+	24974816	25039346	TCONS_00102867	22	5442	XLOC_028245	AASS	aminoadipate-semialdehyde synthase [Source:VGNC Symbol;Acc:VGNC:84944]
ENSSSCG00000016613	Downregulated	223285	18	+	24974816	25039346	TCONS_00102868	24	5670	XLOC_028245	AASS	aminoadipate-semialdehyde synthase [Source:VGNC Symbol;Acc:VGNC:84944]
ENSSSCG00000016613	Downregulated	223286	18	+	24974816	25039346	TCONS_00102869	24	5629	XLOC_028245	AASS	aminoadipate-semialdehyde synthase [Source:VGNC Symbol;Acc:VGNC:84944]
ENSSSCG00000016613	Downregulated	223287	18	+	24974816	25039346	TCONS_00102870	23	5558	XLOC_028245	AASS	aminoadipate-semialdehyde synthase [Source:VGNC Symbol;Acc:VGNC:84944]
ENSSSCG00000016613	Downregulated	223288	18	+	24974816	25039346	TCONS_00102871	24	5654	XLOC_028245	AASS	aminoadipate-semialdehyde synthase [Source:VGNC Symbol;Acc:VGNC:84944]
ENSSSCG00000016613	Downregulated	223289	18	+	24974816	25039346	TCONS_00102872	24	5654	XLOC_028245	AASS	aminoadipate-semialdehyde synthase [Source:VGNC Symbol;Acc:VGNC:84944]
ENSSSCG00000016613	Downregulated	223290	18	+	24974816	25039346	TCONS_00102873	24	5647	XLOC_028245	AASS	aminoadipate-semialdehyde synthase [Source:VGNC Symbol;Acc:VGNC:84944]
ENSSSCG00000016613	Downregulated	223291	18	+	24974816	25039346	TCONS_00102874	24	5654	XLOC_028245	AASS	aminoadipate-semialdehyde synthase [Source:VGNC Symbol;Acc:VGNC:84944]
ENSSSCG00000016613	Downregulated	223292	18	+	24974816	25100940	TCONS_00102875	23	2496	XLOC_028245	AASS	aminoadipate-semialdehyde synthase [Source:VGNC Symbol;Acc:VGNC:84944]
ENSSSCG00000016613	Downregulated	223293	18	+	24974827	25039194	TCONS_00102876	23	5402	XLOC_028245	AASS	aminoadipate-semialdehyde synthase [Source:VGNC Symbol;Acc:VGNC:84944]
ENSSSCG00000016613	Downregulated	223294	18	+	24974844	25039122	TCONS_00102877	23	5279	XLOC_028245	AASS	aminoadipate-semialdehyde synthase [Source:VGNC Symbol;Acc:VGNC:84944]
ENSSSCG00000016613	Downregulated	223295	18	+	24983021	25039346	TCONS_00102878	23	5576	XLOC_028245	AASS	aminoadipate-semialdehyde synthase [Source:VGNC Symbol;Acc:VGNC:84944]
ENSSSCG00000016613	Downregulated	223296	18	-	24988452	25039175	TCONS_00105428	23	5225	XLOC_028987	AASS	aminoadipate-semialdehyde synthase [Source:VGNC Symbol;Acc:VGNC:84944]
ENSSSCG00000016613	Downregulated	223297	18	-	24991294	25039175	TCONS_00105429	22	5102	XLOC_028987	AASS	aminoadipate-semialdehyde synthase [Source:VGNC Symbol;Acc:VGNC:84944]
ENSSSCG00000016613	Downregulated	223298	18	+	24999710	25039346	TCONS_00102879	16	4678	XLOC_028245	AASS	aminoadipate-semialdehyde synthase [Source:VGNC Symbol;Acc:VGNC:84944]
ENSSSCG00000016613	Downregulated	223299	18	-	25012186	25039175	TCONS_00105430	12	4000	XLOC_028987	AASS	aminoadipate-semialdehyde synthase [Source:VGNC Symbol;Acc:VGNC:84944]
ENSSSCG00000016613	Downregulated	223300	18	+	25027601	25039346	TCONS_00102880	5	3286	XLOC_028245	AASS	aminoadipate-semialdehyde synthase [Source:VGNC Symbol;Acc:VGNC:84944]
ENSSSCG00000016613	Downregulated	223301	18	-	25030223	25036713	TCONS_00105431	4	628	XLOC_028987	AASS	aminoadipate-semialdehyde synthase [Source:VGNC Symbol;Acc:VGNC:84944]
ENSSSCG00000016613	Downregulated	223302	18	-	25032995	25036833	TCONS_00105432	4	724	XLOC_028987	AASS	aminoadipate-semialdehyde synthase [Source:VGNC Symbol;Acc:VGNC:84944]
ENSSSCG00000016613	Downregulated	223303	18	-	25033111	25036782	TCONS_00105433	4	594	XLOC_028987	AASS	aminoadipate-semialdehyde synthase [Source:VGNC Symbol;Acc:VGNC:84944]
ENSSSCG00000016613	Downregulated	223304	18	+	25033725	25039346	TCONS_00102881	4	3167	XLOC_028245	AASS	aminoadipate-semialdehyde synthase [Source:VGNC Symbol;Acc:VGNC:84944]
ENSSSCG00000045649	Downregulated	190234	14	+	56585222	56611242	TCONS_00067600	3	916	XLOC_018453	ENSSSCG00000045649
ENSSSCG00000045649	Downregulated	190239	14	+	56601643	56611242	TCONS_00067605	4	5470	XLOC_018453	ENSSSCG00000045649
ENSSSCG00000045649	Downregulated	190240	14	+	56601643	56611242	TCONS_00067606	5	5354	XLOC_018453	ENSSSCG00000045649
ENSSSCG00000045649	Downregulated	190241	14	+	56601643	56611363	TCONS_00067607	5	5377	XLOC_018453	ENSSSCG00000045649
ENSSSCG00000045649	Downregulated	190242	14	+	56601786	56605734	TCONS_00067608	2	3842	XLOC_018453	ENSSSCG00000045649
ENSSSCG00000045649	Downregulated	190243	14	+	56604885	56609225	TCONS_00067609	2	1807	XLOC_018453	ENSSSCG00000045649
ENSSSCG00000049534	Downregulated	107417	7	+	16890251	16895519	TCONS_00191076	4	2996	XLOC_051622	ENSSSCG00000049534
ENSSSCG00000049534	Downregulated	107418	7	-	16892435	16895464	TCONS_00197907	3	1762	XLOC_053527	ENSSSCG00000049534
ENSSSCG00000049534	Downregulated	107419	7	-	16892435	16895482	TCONS_00197908	1	3048	XLOC_053527	ENSSSCG00000049534
ENSSSCG00000049534	Downregulated	107420	7	+	16892475	16895519	TCONS_00191077	2	2636	XLOC_051622	ENSSSCG00000049534
ENSSSCG00000049534	Downregulated	107421	7	+	16892478	16895519	TCONS_00191078	3	1978	XLOC_051622	ENSSSCG00000049534
ENSSSCG00000049534	Downregulated	107422	7	+	16893351	16894170	TCONS_00191079	2	411	XLOC_051622	ENSSSCG00000049534
ENSSSCG00000049534	Downregulated	107423	7	+	16893504	16909797	TCONS_00191080	3	1750	XLOC_051622	ENSSSCG00000049534
ENSSSCG00000038429	Downregulated	147798	10	-	66433107	66435679	TCONS_00028841	3	1162	XLOC_008240	ENSSSCG00000038429
ENSSSCG00000038429	Downregulated	147799	10	-	66433107	66435876	TCONS_00028842	3	1319	XLOC_008240	ENSSSCG00000038429
ENSSSCG00000038429	Downregulated	147800	10	-	66433107	66436882	TCONS_00028843	5	1687	XLOC_008240	ENSSSCG00000038429
ENSSSCG00000038429	Downregulated	147801	10	-	66433107	66436987	TCONS_00028844	5	1792	XLOC_008240	ENSSSCG00000038429
ENSSSCG00000038429	Downregulated	147802	10	-	66433107	66437271	TCONS_00028845	6	1986	XLOC_008240	ENSSSCG00000038429
ENSSSCG00000038429	Downregulated	147803	10	-	66433107	66437677	TCONS_00028846	6	2297	XLOC_008240	ENSSSCG00000038429
ENSSSCG00000038429	Downregulated	147804	10	-	66433107	66437692	TCONS_00028847	4	3758	XLOC_008240	ENSSSCG00000038429
ENSSSCG00000038429	Downregulated	147805	10	-	66433252	66436118	TCONS_00028848	4	1080	XLOC_008240	ENSSSCG00000038429
ENSSSCG00000038429	Downregulated	147806	10	-	66433253	66436118	TCONS_00028849	4	931	XLOC_008240	ENSSSCG00000038429
ENSSSCG00000038429	Downregulated	147807	10	-	66433260	66436882	TCONS_00028850	3	1924	XLOC_008240	ENSSSCG00000038429
ENSSSCG00000038429	Downregulated	147808	10	+	66433344	66436141	TCONS_00025433	4	790	XLOC_007188	ENSSSCG00000038429
ENSSSCG00000031344	Downregulated	94126	6	+	65847983	65951768	TCONS_00173563	6	1527	XLOC_047092	AJAP1	adherens junctions associated protein 1 [Source:VGNC Symbol;Acc:VGNC:85207]
ENSSSCG00000031344	Downregulated	94127	6	+	65847983	65952127	TCONS_00173564	6	1886	XLOC_047092	AJAP1	adherens junctions associated protein 1 [Source:VGNC Symbol;Acc:VGNC:85207]
ENSSSCG00000031344	Downregulated	94128	6	+	65889467	65951768	TCONS_00173565	6	1691	XLOC_047092	AJAP1	adherens junctions associated protein 1 [Source:VGNC Symbol;Acc:VGNC:85207]
ENSSSCG00000031344	Downregulated	94129	6	+	65892746	65902537	TCONS_00173566	2	5209	XLOC_047093	AJAP1	adherens junctions associated protein 1 [Source:VGNC Symbol;Acc:VGNC:85207]
ENSSSCG00000031344	Downregulated	94130	6	-	65896949	65902660	TCONS_00184234	3	4977	XLOC_049870	AJAP1	adherens junctions associated protein 1 [Source:VGNC Symbol;Acc:VGNC:85207]
ENSSSCG00000031344	Downregulated	94131	6	-	65896949	65902660	TCONS_00184235	1	5712	XLOC_049870	AJAP1	adherens junctions associated protein 1 [Source:VGNC Symbol;Acc:VGNC:85207]
ENSSSCG00000031344	Downregulated	94132	6	-	65896949	65910966	TCONS_00184236	2	4847	XLOC_049870	AJAP1	adherens junctions associated protein 1 [Source:VGNC Symbol;Acc:VGNC:85207]
ENSSSCG00000031344	Downregulated	94133	6	-	65896949	65946121	TCONS_00184237	4	797	XLOC_049870	AJAP1	adherens junctions associated protein 1 [Source:VGNC Symbol;Acc:VGNC:85207]
ENSSSCG00000031344	Downregulated	94134	6	-	65896949	65946157	TCONS_00184238	4	833	XLOC_049870	AJAP1	adherens junctions associated protein 1 [Source:VGNC Symbol;Acc:VGNC:85207]
ENSSSCG00000031344	Downregulated	94135	6	-	65896949	65951741	TCONS_00184239	5	942	XLOC_049870	AJAP1	adherens junctions associated protein 1 [Source:VGNC Symbol;Acc:VGNC:85207]
ENSSSCG00000031344	Downregulated	94136	6	-	65951007	65952761	TCONS_00184240	1	1755	XLOC_049870	AJAP1	adherens junctions associated protein 1 [Source:VGNC Symbol;Acc:VGNC:85207]
ENSSSCG00000044768	Downregulated	67497	4	-	96861306	96862942	TCONS_00154141	2	983	XLOC_041855	ENSSSCG00000044768
ENSSSCG00000044768	Downregulated	67498	4	-	96861306	96863129	TCONS_00154142	2	968	XLOC_041855	ENSSSCG00000044768
ENSSSCG00000044768	Downregulated	67499	4	+	96861405	96863103	TCONS_00147541	2	843	XLOC_040067	ENSSSCG00000044768
ENSSSCG00000044768	Downregulated	67500	4	+	96861405	96863103	TCONS_00147542	3	478	XLOC_040067	ENSSSCG00000044768
ENSSSCG00000044768	Downregulated	67501	4	-	96861733	96862061	TCONS_00154143	2	290	XLOC_041855	ENSSSCG00000044768
ENSSSCG00000008624	Downregulated	57613	3	-	124935974	125034653	TCONS_00142544	22	5561	XLOC_038628	LPIN1	lipin 1 [Source:VGNC Symbol;Acc:VGNC:89793]
ENSSSCG00000008624	Downregulated	57614	3	-	124940548	125021013	TCONS_00142545	22	5966	XLOC_038628	LPIN1	lipin 1 [Source:VGNC Symbol;Acc:VGNC:89793]
ENSSSCG00000008624	Downregulated	57615	3	-	124940548	125021050	TCONS_00142546	24	6587	XLOC_038628	LPIN1	lipin 1 [Source:VGNC Symbol;Acc:VGNC:89793]
ENSSSCG00000008624	Downregulated	57616	3	-	124940548	125021050	TCONS_00142547	21	5665	XLOC_038628	LPIN1	lipin 1 [Source:VGNC Symbol;Acc:VGNC:89793]
ENSSSCG00000008624	Downregulated	57617	3	-	124940548	125021050	TCONS_00142548	20	5587	XLOC_038628	LPIN1	lipin 1 [Source:VGNC Symbol;Acc:VGNC:89793]
ENSSSCG00000008624	Downregulated	57618	3	-	124940548	125034653	TCONS_00142549	21	5669	XLOC_038628	LPIN1	lipin 1 [Source:VGNC Symbol;Acc:VGNC:89793]
ENSSSCG00000008624	Downregulated	57619	3	-	124940548	125034653	TCONS_00142550	20	5579	XLOC_038628	LPIN1	lipin 1 [Source:VGNC Symbol;Acc:VGNC:89793]
ENSSSCG00000008624	Downregulated	57620	3	-	124940548	125034653	TCONS_00142551	21	5685	XLOC_038628	LPIN1	lipin 1 [Source:VGNC Symbol;Acc:VGNC:89793]
ENSSSCG00000008624	Downregulated	57621	3	-	124940559	125034653	TCONS_00142552	21	5676	XLOC_038628	LPIN1	lipin 1 [Source:VGNC Symbol;Acc:VGNC:89793]
ENSSSCG00000008624	Downregulated	57622	3	-	124940559	125074123	TCONS_00142553	21	5655	XLOC_038628	LPIN1	lipin 1 [Source:VGNC Symbol;Acc:VGNC:89793]
ENSSSCG00000008624	Downregulated	57623	3	-	124940560	125021050	TCONS_00142554	20	5572	XLOC_038628	LPIN1	lipin 1 [Source:VGNC Symbol;Acc:VGNC:89793]
ENSSSCG00000008624	Downregulated	57624	3	+	124940610	125001525	TCONS_00134240	19	5466	XLOC_036532	LPIN1	lipin 1 [Source:VGNC Symbol;Acc:VGNC:89793]
ENSSSCG00000008624	Downregulated	57625	3	+	124940610	125020936	TCONS_00134241	20	5411	XLOC_036532	LPIN1	lipin 1 [Source:VGNC Symbol;Acc:VGNC:89793]
ENSSSCG00000008624	Downregulated	57626	3	-	124940722	125021037	TCONS_00142555	22	5783	XLOC_038628	LPIN1	lipin 1 [Source:VGNC Symbol;Acc:VGNC:89793]
ENSSSCG00000008624	Downregulated	57627	3	-	124941996	125020957	TCONS_00142556	24	5046	XLOC_038628	LPIN1	lipin 1 [Source:VGNC Symbol;Acc:VGNC:89793]
ENSSSCG00000008624	Downregulated	57628	3	-	124942010	125021031	TCONS_00142557	21	4184	XLOC_038628	LPIN1	lipin 1 [Source:VGNC Symbol;Acc:VGNC:89793]
ENSSSCG00000008624	Downregulated	57629	3	-	124972307	125003006	TCONS_00142558	11	5825	XLOC_038628	LPIN1	lipin 1 [Source:VGNC Symbol;Acc:VGNC:89793]
ENSSSCG00000031818	Downregulated	137957	9	+	102371547	102663400	TCONS_00218077	2	404	XLOC_059177	ENSSSCG00000031818
ENSSSCG00000031818	Downregulated	137965	9	+	102435424	102554304	TCONS_00218078	4	726	XLOC_059178	ENSSSCG00000031818
ENSSSCG00000031818	Downregulated	137966	9	+	102435429	102455904	TCONS_00218079	4	1798	XLOC_059178	ENSSSCG00000031818
ENSSSCG00000031818	Downregulated	137967	9	+	102435441	102455904	TCONS_00218080	3	1590	XLOC_059178	ENSSSCG00000031818
ENSSSCG00000031818	Downregulated	137968	9	+	102435442	102455904	TCONS_00218081	5	2112	XLOC_059178	ENSSSCG00000031818
ENSSSCG00000031818	Downregulated	137969	9	+	102435442	102455904	TCONS_00218082	3	1589	XLOC_059178	ENSSSCG00000031818
ENSSSCG00000031818	Downregulated	137970	9	+	102435442	102455904	TCONS_00218083	5	2790	XLOC_059178	ENSSSCG00000031818
ENSSSCG00000031818	Downregulated	137972	9	-	102449407	102455912	TCONS_00224131	4	1084	XLOC_060979	ENSSSCG00000031818
ENSSSCG00000035105	Downregulated	192234	14	-	77645667	77737578	TCONS_00076002	6	5955	XLOC_020520	ENSSSCG00000035105	dual specificity phosphatase 13 [Source:NCBI gene (formerly Entrezgene);Acc:100154205]
ENSSSCG00000035105	Downregulated	192235	14	-	77651967	77669231	TCONS_00076003	6	6040	XLOC_020521	ENSSSCG00000035105	dual specificity phosphatase 13 [Source:NCBI gene (formerly Entrezgene);Acc:100154205]
ENSSSCG00000035105	Downregulated	192236	14	-	77651967	77677666	TCONS_00076004	10	6527	XLOC_020521	ENSSSCG00000035105	dual specificity phosphatase 13 [Source:NCBI gene (formerly Entrezgene);Acc:100154205]
ENSSSCG00000035105	Downregulated	192237	14	-	77651967	77677707	TCONS_00076005	8	6274	XLOC_020521	ENSSSCG00000035105	dual specificity phosphatase 13 [Source:NCBI gene (formerly Entrezgene);Acc:100154205]
ENSSSCG00000035105	Downregulated	192238	14	-	77660124	77677707	TCONS_00076006	8	4046	XLOC_020521	ENSSSCG00000035105	dual specificity phosphatase 13 [Source:NCBI gene (formerly Entrezgene);Acc:100154205]
ENSSSCG00000035105	Downregulated	192239	14	-	77660124	77677707	TCONS_00076007	8	5271	XLOC_020521	ENSSSCG00000035105	dual specificity phosphatase 13 [Source:NCBI gene (formerly Entrezgene);Acc:100154205]
ENSSSCG00000035105	Downregulated	192240	14	-	77660124	77677707	TCONS_00076008	11	4285	XLOC_020521	ENSSSCG00000035105	dual specificity phosphatase 13 [Source:NCBI gene (formerly Entrezgene);Acc:100154205]
ENSSSCG00000035105	Downregulated	192241	14	-	77660124	77677707	TCONS_00076009	9	3991	XLOC_020521	ENSSSCG00000035105	dual specificity phosphatase 13 [Source:NCBI gene (formerly Entrezgene);Acc:100154205]
ENSSSCG00000035105	Downregulated	192242	14	-	77660124	77677707	TCONS_00076010	9	5467	XLOC_020521	ENSSSCG00000035105	dual specificity phosphatase 13 [Source:NCBI gene (formerly Entrezgene);Acc:100154205]
ENSSSCG00000035105	Downregulated	192243	14	-	77660124	77677707	TCONS_00076011	7	5326	XLOC_020521	ENSSSCG00000035105	dual specificity phosphatase 13 [Source:NCBI gene (formerly Entrezgene);Acc:100154205]
ENSSSCG00000035105	Downregulated	192244	14	-	77660124	77875500	TCONS_00076012	8	5278	XLOC_020521	ENSSSCG00000035105	dual specificity phosphatase 13 [Source:NCBI gene (formerly Entrezgene);Acc:100154205]
ENSSSCG00000035105	Downregulated	192245	14	-	77660129	77669231	TCONS_00076013	6	5032	XLOC_020521	ENSSSCG00000035105	dual specificity phosphatase 13 [Source:NCBI gene (formerly Entrezgene);Acc:100154205]
ENSSSCG00000035105	Downregulated	192246	14	-	77660129	77677666	TCONS_00076014	10	4294	XLOC_020521	ENSSSCG00000035105	dual specificity phosphatase 13 [Source:NCBI gene (formerly Entrezgene);Acc:100154205]
ENSSSCG00000035105	Downregulated	192247	14	-	77664133	77677666	TCONS_00076015	10	1554	XLOC_020521	ENSSSCG00000035105	dual specificity phosphatase 13 [Source:NCBI gene (formerly Entrezgene);Acc:100154205]
ENSSSCG00000013767	Downregulated	31323	2	+	65117290	65127119	TCONS_00111202	8	2628	XLOC_030567	PALM3	paralemmin 3 [Source:VGNC Symbol;Acc:VGNC:91161]
ENSSSCG00000013767	Downregulated	31324	2	+	65117290	65127119	TCONS_00111203	8	2427	XLOC_030567	PALM3	paralemmin 3 [Source:VGNC Symbol;Acc:VGNC:91161]
ENSSSCG00000013767	Downregulated	31325	2	+	65117290	65127119	TCONS_00111204	7	2559	XLOC_030567	PALM3	paralemmin 3 [Source:VGNC Symbol;Acc:VGNC:91161]
ENSSSCG00000013767	Downregulated	31326	2	-	65117299	65127082	TCONS_00121059	7	2513	XLOC_033077	PALM3	paralemmin 3 [Source:VGNC Symbol;Acc:VGNC:91161]
ENSSSCG00000015595	Downregulated	140422	9	-	130770428	130778809	TCONS_00225405	2	4580	XLOC_061279	ATF3	activating transcription factor 3 [Source:VGNC Symbol;Acc:VGNC:85606]
ENSSSCG00000015595	Downregulated	140423	9	-	130770428	130787462	TCONS_00225406	4	9865	XLOC_061279	ATF3	activating transcription factor 3 [Source:VGNC Symbol;Acc:VGNC:85606]
ENSSSCG00000015595	Downregulated	140424	9	-	130770428	130787462	TCONS_00225407	6	5813	XLOC_061279	ATF3	activating transcription factor 3 [Source:VGNC Symbol;Acc:VGNC:85606]
ENSSSCG00000015595	Downregulated	140425	9	-	130770428	130787462	TCONS_00225408	5	5700	XLOC_061279	ATF3	activating transcription factor 3 [Source:VGNC Symbol;Acc:VGNC:85606]
ENSSSCG00000015595	Downregulated	140426	9	-	130770428	130787462	TCONS_00225409	3	6940	XLOC_061279	ATF3	activating transcription factor 3 [Source:VGNC Symbol;Acc:VGNC:85606]
ENSSSCG00000015595	Downregulated	140427	9	-	130772259	130785506	TCONS_00225410	5	2113	XLOC_061279	ATF3	activating transcription factor 3 [Source:VGNC Symbol;Acc:VGNC:85606]
ENSSSCG00000015595	Downregulated	140428	9	-	130772259	130787462	TCONS_00225411	4	3956	XLOC_061279	ATF3	activating transcription factor 3 [Source:VGNC Symbol;Acc:VGNC:85606]
ENSSSCG00000015595	Downregulated	140429	9	-	130772259	130787462	TCONS_00225412	5	3869	XLOC_061279	ATF3	activating transcription factor 3 [Source:VGNC Symbol;Acc:VGNC:85606]
ENSSSCG00000015595	Downregulated	140430	9	+	130772301	130785412	TCONS_00219255	4	1864	XLOC_059503	ATF3	activating transcription factor 3 [Source:VGNC Symbol;Acc:VGNC:85606]
ENSSSCG00000015595	Downregulated	140431	9	+	130772305	130785014	TCONS_00219256	4	1780	XLOC_059503	ATF3	activating transcription factor 3 [Source:VGNC Symbol;Acc:VGNC:85606]
ENSSSCG00000015595	Downregulated	140432	9	+	130772341	130778348	TCONS_00219257	3	1972	XLOC_059503	ATF3	activating transcription factor 3 [Source:VGNC Symbol;Acc:VGNC:85606]
ENSSSCG00000015595	Downregulated	140433	9	+	130772353	130785412	TCONS_00219258	3	2965	XLOC_059503	ATF3	activating transcription factor 3 [Source:VGNC Symbol;Acc:VGNC:85606]
ENSSSCG00000015595	Downregulated	140434	9	+	130772362	130778348	TCONS_00219259	3	1945	XLOC_059503	ATF3	activating transcription factor 3 [Source:VGNC Symbol;Acc:VGNC:85606]
ENSSSCG00000042625	Downregulated	164705	12	+	58251352	58289935	TCONS_00040095	4	4653	XLOC_011309	ENSSSCG00000042625
ENSSSCG00000042625	Downregulated	164706	12	+	58251352	58338547	TCONS_00040096	5	535	XLOC_011309	ENSSSCG00000042625
ENSSSCG00000042625	Downregulated	164707	12	+	58257438	58289948	TCONS_00040097	4	4659	XLOC_011309	ENSSSCG00000042625
ENSSSCG00000042625	Downregulated	164708	12	+	58257438	58398366	TCONS_00040098	9	2436	XLOC_011309	ENSSSCG00000042625
ENSSSCG00000042625	Downregulated	164709	12	+	58257438	58398366	TCONS_00040099	9	2436	XLOC_011309	ENSSSCG00000042625
ENSSSCG00000042625	Downregulated	164711	12	+	58282998	58289948	TCONS_00040101	3	5375	XLOC_011309	ENSSSCG00000042625
ENSSSCG00000042625	Downregulated	164712	12	+	58282998	58421114	TCONS_00040102	9	2031	XLOC_011309	ENSSSCG00000042625
ENSSSCG00000042625	Downregulated	164713	12	-	58284570	58339468	TCONS_00046044	4	958	XLOC_012815	ENSSSCG00000042625
ENSSSCG00000042625	Downregulated	164716	12	+	58344536	58398322	TCONS_00040105	6	4089	XLOC_011309	ENSSSCG00000042625
ENSSSCG00000042625	Downregulated	164717	12	+	58344536	58398366	TCONS_00040106	7	4184	XLOC_011309	ENSSSCG00000042625
ENSSSCG00000042625	Downregulated	164718	12	+	58344536	58421114	TCONS_00040107	8	3063	XLOC_011309	ENSSSCG00000042625
ENSSSCG00000042625	Downregulated	164719	12	-	58358999	58368289	TCONS_00046045	3	1142	XLOC_012816	ENSSSCG00000042625
ENSSSCG00000042625	Downregulated	164720	12	+	58359060	58369574	TCONS_00040108	4	837	XLOC_011313	ENSSSCG00000042625
ENSSSCG00000042625	Downregulated	164721	12	+	58370141	58378366	TCONS_00040109	2	7954	XLOC_011309	ENSSSCG00000042625
ENSSSCG00000042625	Downregulated	164722	12	+	58370141	58398366	TCONS_00040110	5	6157	XLOC_011309	ENSSSCG00000042625
ENSSSCG00000037645	Downregulated	84788	6	+	4043140	4146435	TCONS_00168863	2	604	XLOC_045862	ENSSSCG00000037645
ENSSSCG00000037645	Downregulated	84807	6	+	4099414	4103009	TCONS_00168869	3	3230	XLOC_045862	ENSSSCG00000037645
ENSSSCG00000037645	Downregulated	84808	6	+	4099415	4146276	TCONS_00168870	5	1626	XLOC_045862	ENSSSCG00000037645
ENSSSCG00000037645	Downregulated	84813	6	+	4116250	4146281	TCONS_00168872	3	1519	XLOC_045862	ENSSSCG00000037645
ENSSSCG00000047186	Downregulated	230475	X	-	82031513	82034288	TCONS_00236891	3	2578	XLOC_065570	ENSSSCG00000047186
ENSSSCG00000047186	Downregulated	230476	X	+	82031539	82034448	TCONS_00233015	1	2910	XLOC_064436	ENSSSCG00000047186
ENSSSCG00000047186	Downregulated	230477	X	-	82031562	82034055	TCONS_00236892	2	2387	XLOC_065570	ENSSSCG00000047186
ENSSSCG00000049117	Downregulated	84809	6	-	4099496	4146272	TCONS_00179621	4	1693	XLOC_048609	ENSSSCG00000049117
ENSSSCG00000049117	Downregulated	84810	6	-	4099496	4146627	TCONS_00179622	5	1940	XLOC_048609	ENSSSCG00000049117
ENSSSCG00000049117	Downregulated	84814	6	-	4129466	4146272	TCONS_00179624	2	3886	XLOC_048609	ENSSSCG00000049117
ENSSSCG00000021464	Downregulated	139486	9	+	121045232	121113693	TCONS_00218758	16	4811	XLOC_059391	SOAT1	sterol O-acyltransferase 1 [Source:VGNC Symbol;Acc:VGNC:93327]
ENSSSCG00000021464	Downregulated	139487	9	+	121045232	121113693	TCONS_00218759	15	4703	XLOC_059391	SOAT1	sterol O-acyltransferase 1 [Source:VGNC Symbol;Acc:VGNC:93327]
ENSSSCG00000021464	Downregulated	139488	9	+	121045232	121113694	TCONS_00218760	15	4704	XLOC_059391	SOAT1	sterol O-acyltransferase 1 [Source:VGNC Symbol;Acc:VGNC:93327]
ENSSSCG00000021464	Downregulated	139489	9	+	121045247	121113689	TCONS_00218761	15	4733	XLOC_059391	SOAT1	sterol O-acyltransferase 1 [Source:VGNC Symbol;Acc:VGNC:93327]
ENSSSCG00000021464	Downregulated	139490	9	-	121045266	121101143	TCONS_00224968	10	1148	XLOC_061174	SOAT1	sterol O-acyltransferase 1 [Source:VGNC Symbol;Acc:VGNC:93327]
ENSSSCG00000021464	Downregulated	139491	9	-	121045266	121112603	TCONS_00224969	16	3687	XLOC_061174	SOAT1	sterol O-acyltransferase 1 [Source:VGNC Symbol;Acc:VGNC:93327]
ENSSSCG00000024917	Downregulated	25302	2	+	9065327	9293073	TCONS_00108281	4	1771	XLOC_029740	ENSSSCG00000024917
ENSSSCG00000024917	Downregulated	25303	2	-	9065357	9066443	TCONS_00117972	2	524	XLOC_032230	ENSSSCG00000024917
ENSSSCG00000024917	Downregulated	25304	2	+	9066240	9066940	TCONS_00108282	2	684	XLOC_029740	ENSSSCG00000024917
ENSSSCG00000015297	Downregulated	136166	9	+	68235558	68508850	TCONS_00217176	9	1544	XLOC_058943	ADAM22	ADAM metallopeptidase domain 22 [Source:VGNC Symbol;Acc:VGNC:85067]
ENSSSCG00000015297	Downregulated	136169	9	+	68252704	68487617	TCONS_00217177	31	7272	XLOC_058944	ADAM22	ADAM metallopeptidase domain 22 [Source:VGNC Symbol;Acc:VGNC:85067]
ENSSSCG00000015297	Downregulated	136170	9	+	68252704	68487617	TCONS_00217178	31	7251	XLOC_058944	ADAM22	ADAM metallopeptidase domain 22 [Source:VGNC Symbol;Acc:VGNC:85067]
ENSSSCG00000015297	Downregulated	136171	9	+	68252704	68487619	TCONS_00217179	30	7259	XLOC_058944	ADAM22	ADAM metallopeptidase domain 22 [Source:VGNC Symbol;Acc:VGNC:85067]
ENSSSCG00000015297	Downregulated	136172	9	+	68252704	68487944	TCONS_00217180	32	7629	XLOC_058944	ADAM22	ADAM metallopeptidase domain 22 [Source:VGNC Symbol;Acc:VGNC:85067]
ENSSSCG00000015297	Downregulated	136173	9	+	68252704	68487944	TCONS_00217181	29	7461	XLOC_058944	ADAM22	ADAM metallopeptidase domain 22 [Source:VGNC Symbol;Acc:VGNC:85067]
ENSSSCG00000015297	Downregulated	136174	9	+	68252704	68487944	TCONS_00217182	30	7458	XLOC_058944	ADAM22	ADAM metallopeptidase domain 22 [Source:VGNC Symbol;Acc:VGNC:85067]
ENSSSCG00000015297	Downregulated	136175	9	+	68252704	68487944	TCONS_00217183	31	6134	XLOC_058944	ADAM22	ADAM metallopeptidase domain 22 [Source:VGNC Symbol;Acc:VGNC:85067]
ENSSSCG00000015297	Downregulated	136176	9	+	68252704	68487944	TCONS_00217184	31	9947	XLOC_058944	ADAM22	ADAM metallopeptidase domain 22 [Source:VGNC Symbol;Acc:VGNC:85067]
ENSSSCG00000015297	Downregulated	136177	9	+	68252704	68487944	TCONS_00217185	30	7581	XLOC_058944	ADAM22	ADAM metallopeptidase domain 22 [Source:VGNC Symbol;Acc:VGNC:85067]
ENSSSCG00000015297	Downregulated	136178	9	+	68252704	68487944	TCONS_00217186	29	7470	XLOC_058944	ADAM22	ADAM metallopeptidase domain 22 [Source:VGNC Symbol;Acc:VGNC:85067]
ENSSSCG00000015297	Downregulated	136179	9	+	68252704	68487944	TCONS_00217187	32	7644	XLOC_058944	ADAM22	ADAM metallopeptidase domain 22 [Source:VGNC Symbol;Acc:VGNC:85067]
ENSSSCG00000015297	Downregulated	136180	9	+	68252704	68487944	TCONS_00217188	31	7429	XLOC_058944	ADAM22	ADAM metallopeptidase domain 22 [Source:VGNC Symbol;Acc:VGNC:85067]
ENSSSCG00000015297	Downregulated	136181	9	+	68252704	68487944	TCONS_00217189	33	7737	XLOC_058944	ADAM22	ADAM metallopeptidase domain 22 [Source:VGNC Symbol;Acc:VGNC:85067]
ENSSSCG00000015297	Downregulated	136182	9	+	68252704	68487944	TCONS_00217190	31	7509	XLOC_058944	ADAM22	ADAM metallopeptidase domain 22 [Source:VGNC Symbol;Acc:VGNC:85067]
ENSSSCG00000015297	Downregulated	136183	9	+	68252704	68487944	TCONS_00217191	32	7596	XLOC_058944	ADAM22	ADAM metallopeptidase domain 22 [Source:VGNC Symbol;Acc:VGNC:85067]
ENSSSCG00000015297	Downregulated	136184	9	+	68253064	68471393	TCONS_00217192	30	4890	XLOC_058944	ADAM22	ADAM metallopeptidase domain 22 [Source:VGNC Symbol;Acc:VGNC:85067]
ENSSSCG00000015297	Downregulated	136185	9	+	68253064	68473812	TCONS_00217193	29	5221	XLOC_058944	ADAM22	ADAM metallopeptidase domain 22 [Source:VGNC Symbol;Acc:VGNC:85067]
ENSSSCG00000015297	Downregulated	136186	9	+	68253306	68487617	TCONS_00217194	31	6658	XLOC_058944	ADAM22	ADAM metallopeptidase domain 22 [Source:VGNC Symbol;Acc:VGNC:85067]
ENSSSCG00000015297	Downregulated	136187	9	+	68253306	68487617	TCONS_00217195	32	6697	XLOC_058944	ADAM22	ADAM metallopeptidase domain 22 [Source:VGNC Symbol;Acc:VGNC:85067]
ENSSSCG00000015297	Downregulated	136188	9	+	68253306	68487617	TCONS_00217196	33	6808	XLOC_058944	ADAM22	ADAM metallopeptidase domain 22 [Source:VGNC Symbol;Acc:VGNC:85067]
ENSSSCG00000015297	Downregulated	136189	9	+	68253306	68487617	TCONS_00217197	33	6865	XLOC_058944	ADAM22	ADAM metallopeptidase domain 22 [Source:VGNC Symbol;Acc:VGNC:85067]
ENSSSCG00000015297	Downregulated	136190	9	+	68253306	68487617	TCONS_00217198	33	6784	XLOC_058944	ADAM22	ADAM metallopeptidase domain 22 [Source:VGNC Symbol;Acc:VGNC:85067]
ENSSSCG00000015297	Downregulated	136191	9	-	68455142	68473737	TCONS_00223240	4	207	XLOC_060717	ADAM22	ADAM metallopeptidase domain 22 [Source:VGNC Symbol;Acc:VGNC:85067]
ENSSSCG00000015297	Downregulated	136192	9	-	68455142	68488069	TCONS_00223241	5	4686	XLOC_060717	ADAM22	ADAM metallopeptidase domain 22 [Source:VGNC Symbol;Acc:VGNC:85067]
ENSSSCG00000015297	Downregulated	136193	9	-	68473799	68488069	TCONS_00223242	3	4505	XLOC_060717	ADAM22	ADAM metallopeptidase domain 22 [Source:VGNC Symbol;Acc:VGNC:85067]
ENSSSCG00000046881	Downregulated	91760	6	-	56561181	56563657	TCONS_00183102	3	1506	XLOC_049540	DPRX	divergent-paired related homeobox [Source:HGNC Symbol;Acc:HGNC:32166]
ENSSSCG00000046881	Downregulated	91761	6	-	56561181	56566498	TCONS_00183103	3	1556	XLOC_049540	DPRX	divergent-paired related homeobox [Source:HGNC Symbol;Acc:HGNC:32166]
ENSSSCG00000046881	Downregulated	91762	6	-	56561181	56567318	TCONS_00183104	4	2415	XLOC_049540	DPRX	divergent-paired related homeobox [Source:HGNC Symbol;Acc:HGNC:32166]
ENSSSCG00000046881	Downregulated	91763	6	-	56561189	56568363	TCONS_00183105	3	1540	XLOC_049540	DPRX	divergent-paired related homeobox [Source:HGNC Symbol;Acc:HGNC:32166]
ENSSSCG00000011977	Downregulated	179728	13	+	160049252	160182679	TCONS_00053538	8	2556	XLOC_014764	DCBLD2	discoidin, CUB and LCCL domain containing 2 [Source:VGNC Symbol;Acc:VGNC:87180]
[truncated: 1,126 more rows]
